# Supplementary material for: STRIPAK directs PP2A activity toward MAP4K4 to promote oncogenic transformation of human cells
Source: eLife. 2020 Jan 8;9:e53003. doi: 10.7554/eLife.53003 (PMC6984821; doi:10.7554/eLife.53003)
Supplement: Figure 2—source data 1. [file elife-53003-fig2-data1.xlsx]

## Sheet: 2C
	GFP	SV40 ST	shLuc	shMAP4K4-82
Replicate 1	10	364	9	264
Replicate 2	9	300	14	184
Replicate 3	15	356	7	180
*Colony number quantified using cellprofiler

## Sheet: 2D
Days	shLuc-1	shLuc-2	shLuc-3	shLuc-4	shLuc-5	shLuc-6	shLuc-7	shLuc-8	shLuc-9	shLuc-10	shLuc-11	shLuc-12	shLuc-13	shLuc-14	shLuc-15
0	0	0	0	0	0	0	0	0	0	0	0	0	0	0	0
7	0	0	1.152	9.126	5.5125	18.944	0	0	9.126	0	3.4295	10.478	0	0	0
14	0	0	4	15.3	17.298	41.067	0	12.1945	30.42	0	7.8125	24.75	0	0	0
21	0	0	6.912	31.046	34.3	63.504	0	21.142	37.926	0	24.064	71.944	0	0	0
28	0	0	15.376	69.629	95	118.098	0	37.975	74.36	0	46.546	97.5375	0	0	0
Days	shMAP4K4-82-1	shMAP4K4-82-2	shMAP4K4-82-3	shMAP4K4-82-4	shMAP4K4-82-5	shMAP4K4-82-6	shMAP4K4-82-7	shMAP4K4-82-8	shMAP4K4-82-9	shMAP4K4-82-10	shMAP4K4-82-11	shMAP4K4-82-12	shMAP4K4-82-13	shMAP4K4-82-14	shMAP4K4-82-15
0	0	0	0	0	0	0	0	0	0	0	0	0	0	0	0
7	23.04	48.074	98.696	6.0835	19.968	45.63	9.0625	18.7395	102.602	4.6305	31.941	140.899	25.3265	19.602	56.7
14	49.5895	158.438	120.787	36.822	55.47	69.696	36.1415	36.1	75.118	72.03	118.588	179.56	87.808	78.652	104.284
21	151.838	346.56	387.099	96.8	129.96	118.098	78.732	93.312	214.243	110.466	233.28	388.08	176.418	194.078	196.52
28	348.174	576.888	635.904	379.456	344.45	352.616	344.389	356.224	489.268	312.666	379.312	684.28	498.677	391.072	390.15
*Tumor volume measured across 5 time points

## Sheet: 2E
	shLuc	shMAP4K4-82
Tumor 1	0	348.174
Tumor 2	0	576.888
Tumor 3	15.376	635.904
Tumor 4	69.629	379.456
Tumor 5	95	344.45
Tumor 6	118.098	352.616
Tumor 7	0	344.389
Tumor 8	37.975	356.224
Tumor 9	74.36	489.268
Tumor 10	0	312.666
Tumor 11	46.546	379.312
Tumor 12	97.5375	684.28
Tumor 13	0	498.677
Tumor 14	0	391.072
Tumor 15	0	390.15
*Tumor volume at day 28
