# Supplementary material for: STRIPAK directs PP2A activity toward MAP4K4 to promote oncogenic transformation of human cells
Source: eLife. 2020 Jan 8;9:e53003. doi: 10.7554/eLife.53003 (PMC6984821; doi:10.7554/eLife.53003)
Supplement: Figure 3—source data 1. [file elife-53003-fig3-data1.xlsx]

## Sheet: 3B
UniProt Accession	Protein Description	Gene Symbol	normGFP/sT_IP1	normGFP/sT_IP2
O95819	Mitogen-activated protein kinase kinase kinase kinase 4	MAP4K4	1	1
Q9Y3A3	MOB-like protein phocein	MOB4	0.375783	0.274835
P30153	Serine/threonine-protein phosphatase 2A 65 kDa regulatory subunit A alpha isoform	PPP2R1A	0.638435	0.556223
Q14BN4	Sarcolemmal membrane-associated protein	SLMAP	0.684263	0.377311
Q5VSL9	Striatin-interacting protein 1	STRIP1	0.374461	0.289106
O43815	Striatin	STRN	0.430341	0.280521
Q13033	Striatin-3	STRN3	0.364963	0.321377
Q9NRL3	Striatin-4	STRN4	0.372888	0.275482

## Sheet: 3D
Sites (O95819-6)	Peptides	norm(GFP/sT)_IP1	norm(GFP/sT)_IP2
S9	sLVDIDLSSLR	2.21314	2.1011
S324; S326	GEKDETEYEYsGsEEEEEEVPEQEGEPSSIVNVPGESTLR; RGEKDETEYEYsGsEEEEEEVPEQEGEPSSIVNVPGESTLR; DETEYEYsGsEEEEEEVPEQEGEPSSIVNVPGESTLR	4.50915	1.08843
T597; S600	TtSRsPVLSR	1.40367	1.90888
S598; S600	TTsRsPVLSR	1.40367	1.97291
S600	TTSRsPVLSR	0.745501	0.952923
S608	RDsPLQGSGQQNSQAGQR; DsPLQGSGQQNSQAGQR	1.00399	1.06604
S651	LVPRPGSGSSsGSSNSGSQPGSHPGSQSGSGER	1.73426	1.92259
S771; S775	AASsLNLsNGETESVK	4.17491	4.18768
S775	AASSLNLsNGETESVK	1.56093	1.61983
T798	TMIVHDDVESEPAMtPSK	1.26877	0.996743
S876	LTANETQsASSTLQK	2.69355	2.57433
S888	SSsSFTPFIDPR	1.13787	1.56549
S889	SSSsFTPFIDPR	1.34848	1.37672
S934	KGsVVNVNPTNTRPQSDTPEIR	1.63387	1.30295
S947	GSVVNVNPTNTRPQsDTPEIR	1.08556	0.783884
T949	GSVVNVNPTNTRPQSDtPEIR; KGSVVNVNPTNTRPQSDtPEIR	1.66259	1.29353
S1251	VFFAsVR	2.54067	2.5485

## Sheet: 3E
	HEK TER GFP-replicate 1	HEK TER GFP-replicate 2	HEK TER GFP-replicate 3	HEK TER ST-replicate 1	HEK TER ST-replicate 2	HEK TER ST-replicate 3	HEK TER GFP + OA-replicate 1	HEK TER GFP + OA-replicate 2	HEK TER GFP + OA-replicate 3	HEK TER ST + OA-replicate 1	HEK TER ST + OA-replicate 2	HEK TER ST + OA-replicate 3
MAP4K4 phosphopeptide 1	1	1	1	2.3204	2.42283	1.93978	0.266667	0.0443975	0.0588235	0.148259	0.00422833	0.0322129
MAP4K4 phosphopeptide 2	1	1	1	2.36933	2.33496	2.25369	0.11615	0.126829	0.166811	0.105383	0.0252033	0.0556038
MAP4K4 phosphopeptide 3	1	1	1	1.36599	1.28158	1.3755	0.0537265	0.10921	0.13911	0.0745304	0.122589	0.14575
*Quantified phosphatase activity normalized to GFP control
