# Supplementary material for: STRIPAK directs PP2A activity toward MAP4K4 to promote oncogenic transformation of human cells
Source: eLife. 2020 Jan 8;9:e53003. doi: 10.7554/eLife.53003 (PMC6984821; doi:10.7554/eLife.53003)
Supplement: Figure 4—source data 1. [file elife-53003-fig4-data1.xlsx]

## Sheet: 4A
	GFP	ST
Replicate 1	1.46194	1
Replicate 2	2.41845	1
Replicate 3	1.65131	1
*Quantified in vitro kinase activity normalized to ST

## Sheet: 4B
Compound 29 - Concentration (uM)	0	0.01	0.1	0.4	0.8	1	2
Replicate 1	7	11	20	28	45	82	30
Replicate 2	17	20	21	36	42	70	39
Replicate 3	13	15	14	40	52	78	35

## Sheet: 4C
	GFP	ST	MAP4K4 WT	MAP4K4 K54R
Replicate 1	28	120	21	127
Replicate 2	36	89	37	140
Replicate 3	13	85	17	89
*Colony number quantified using cell profiler
	GFP	ST	MAP4K4 WT	MAP4K4 K54R
Mean	25.6667	98	25	118.667
STDEV	11.6762	19.1572	10.583	26.5016
