# Supplementary material for: STRIPAK directs PP2A activity toward MAP4K4 to promote oncogenic transformation of human cells
Source: eLife. 2020 Jan 8;9:e53003. doi: 10.7554/eLife.53003 (PMC6984821; doi:10.7554/eLife.53003)
Supplement: Figure 5—source data 1. [file elife-53003-fig5-data1.xlsx]

## Sheet: 5C
	shLuc	shSTRN4-58
Replicate 1	48	25
Replicate 2	72	38
Replicate 3	55	33
*Colony number quantified using cellprofiler

## Sheet: 5D
	shLuc-replicate 1	shLuc-replicate 2	shLuc-replicate 3	shSTRN4-58-replicate 1	shSTRN4-58-replicate 2	shSTRN4-58-replicate 3
LacZ	100	162	71	27	52	66
STRN4-58R	76	135	126	70	76	128
*Colony number quantified using cellprofiler

## Sheet: 5E
Days	shLuc-1	shLuc-2	shLuc-3	shLuc-4	shLuc-5	shLuc-6	shLuc-7	shLuc-8	shLuc-9	shLuc-10	shLuc-11	shLuc-12	shLuc-13	shLuc-14	shLuc-15	shSTRN4-58-1	shSTRN4-58-2	shSTRN4-58-3	shSTRN4-58-4	shSTRN4-58-5	shSTRN4-58-6	shSTRN4-58-7	shSTRN4-58-8	shSTRN4-58-9	shSTRN4-58-10	shSTRN4-58-11	shSTRN4-58-12	shSTRN4-58-13	shSTRN4-58-14	shSTRN4-58-15
0	0	0	0	0	0	0	0	0	0	0	0	0	0	0	0	0	0	0	0	0	0	0	0	0	0	0	0	0	0	0
7	310.005	284.752	373.968	195.272	249.952	222.206	215.825	182.574	257.911	288	135.759	180.336	162.662	143.36	367.84	16.384	34.2225	52.9	1.6875	21.866	92.697	0	0	52.92	5.324	5.324	95.2875	51.304	36.1375	72.897
14	632.462	495.144	744.185	373.977	472.384	547.428	409.05	455.455	625.931	350.413	439.002	667.013	437.712	368.562	632.736	84.7	90.944	138.6	22.542	57.6	114.464	5.2345	22.5	120.6	6.912	7.986	145.926	131.584	71.25	154.422
21	848.318	772.808	990.976	583.808	661.567	851.238	756.25	661.5	912.022	612.864	710.803	960.756	701.8	590.646	805.752	126	130.977	294.4	165.888	171.113	254.571	45.63	30.056	287.086	32.7015	16.464	259.92	264.384	150.174	284.062
Tumor volume measured cross 4 time-points

## Sheet: 5F
	shLuc	shSTRN4-58
Tumor 1	848.318	126
Tumor 2	772.808	130.977
Tumor 3	990.976	294.4
Tumor 4	583.808	165.888
Tumor 5	661.567	171.113
Tumor 6	851.238	254.571
Tumor 7	756.25	45.63
Tumor 8	661.5	30.056
Tumor 9	912.022	287.086
Tumor 10	612.864	32.7015
Tumor 11	710.803	16.464
Tumor 12	960.756	259.92
Tumor 13	701.8	264.384
Tumor 14	590.646	150.174
Tumor 15	805.752	284.062
*Tumor volume measured at Day 28
