# Supplementary material for: STRIPAK directs PP2A activity toward MAP4K4 to promote oncogenic transformation of human cells
Source: eLife. 2020 Jan 8;9:e53003. doi: 10.7554/eLife.53003 (PMC6984821; doi:10.7554/eLife.53003)
Supplement: Figure 6—source data 1. [file elife-53003-fig6-data1.xlsx]

## Sheet: 6B
Locus	Gene	STRN4-IP_GFP_dNSAF	Normalized to STRN4	STRN4-IP_SV40-ST_dNSAF	Normalized to STRN4	ST/GFP Fold-change
NP_663719.2	MAP4K4	0.00135117	0.0431492	0.00194964	0.0703306	1.62994
NP_061174.1	CTTNBP2NL	0.00908473	0.290118	0.0130634	0.471243	1.62431
NP_009090.2	SLMAP	0.00533409	0.170343	0.0081199	0.292914	1.71956
NP_001291349.1	SLMAP	0.00522457	0.166845	0.00397659	0.14345	0.859779
	SLMAP (isoa+b)	0.0105587	0.337188	0.0120965	0.436364	1.29413
NP_003153.2	STRN/STRN1	0.0344222	1.09926	0.0393035	1.41782	1.28979
NP_079349.2	SIKE1	0.00668745	0.213562	0.0117618	0.424289	1.98673
NP_001095866.1	SIKE1	0.00164017	0.0523784	X
	SIKE1 (iso1+2)	0.255578	8.16182	0.258418	9.32207	1.14216
NP_002706.1	PPP2CA	0.00951386	0.303822	0.0144077	0.519739	1.71067
NP_001009552.1	PPP2CB	0.00475693	0.151911	X
	PP2A C (Ca + Cb)	0.0142708	0.455734	0.0144077	0.519739	1.14045
NP_149079.2	STRIP1	0.0197744	0.631491	0.0186676	0.673408	1.06638
NP_001034966.1	STRN4	0.0313139	1	0.0277211	1	1

## Sheet: 6D
	shLuc	shSTRN4-58
Replicate 1	1	1.63074
Replicate 2	1	1.44512
* Quantified kinase activity normalized to shLuc control.
	shLuc	shSTRN4-58
Mean	1	1.53793
STDEV	0	0.131252

## Sheet: 6E
	shMAP4K4-82	shLuc	shLuc	shMAP4K4-82/shSTRN4-58
Replicate 1	4.53846	1	1	5.28571
Replicate 2	4.91667	1	1	3.35417
Replicate 3	3.77273	1	1	6.45455
* Colony count normzlied to respective shLuc control.
	shMAP4K4-82	shLuc	shLuc	shMAP4K4-82/shSTRN4-58
Mean	4.40929	1	1	5.03148
STDEV	0.582808	0	0	1.56575
