# Supplementary material for: STRIPAK directs PP2A activity toward MAP4K4 to promote oncogenic transformation of human cells
Source: eLife. 2020 Jan 8;9:e53003. doi: 10.7554/eLife.53003 (PMC6984821; doi:10.7554/eLife.53003)
Supplement: Figure 7—source data 1. [file elife-53003-fig7-data1.xlsx]

## Sheet: 7E
	shLuc	shMAP4K4-82
Replicate 1	246.91	430.236
Replicate 2	267.769	409.605
Replicate 3	243.19	362.531
* TPM value of CTGF obtained from RNAseq profiling

## Sheet: 7F
	shLuc	shMAP4K4-82
Replicate 1	277.128	604.93
Replicate 2	310.363	563.387
Replicate 3	276.121	604.961
* TPM value of CTGF obtained from RNAseq profiling
