# Supplementary material for: STRIPAK directs PP2A activity toward MAP4K4 to promote oncogenic transformation of human cells
Source: eLife. 2020 Jan 8;9:e53003. doi: 10.7554/eLife.53003 (PMC6984821; doi:10.7554/eLife.53003)
Supplement: Figure 8—source data 1. [file elife-53003-fig8-data1.xlsx]

## Sheet: 8A
	control	shYAP1	shMAP4K4-82	shMAP4K4-82 + shYAP1
Replicate 1	15	5	112	38
Replicate 2	21	4	116	12
Replicate 3	17	9	104	16
* Colony number quntified using Cellprofiler
	control	shYAP1	shMAP4K4-82	shMAP4K4-82 + shYAP1
mean	17.6667	6	110.667	22
stdev	3.05505	2.64575	6.1101	14

## Sheet: 8B
	shLuc-1	shLuc-2	shLuc-3	shSTRN4-55-1	shSTRN4-55-2	shSTRN4-55-3	shSTRN4-58-1	shSTRN4-58-2	shSTRN4-58-3
Vector	1	1	1	0.261905	0.310897	0.502793	0.27551	0.278846	0.312849
YAP1 WT	1	1	1	1.1107	0.788235	1.20667	0.870849	0.644118	0.743333
YAP1 5SA	1	1	1	1.1399	1.04717	1.28351	0.803109	0.721698	0.706186
*Colony number quantified using Cellprofiler and normalized by shLuc control
Mean	shLuc	shSTRN4-55	shSTRN4-58
Vector	1	0.358532	0.289069
YAP1 WT	1	1.0352	0.752767
YAP1 5SA	1	1.15686	0.743664
stdev	shLuc	shSTRN4-55	shSTRN4-58
Vector	0	0.127313	0.0206621
YAP1 WT	0	0.219195	0.11366
YAP1 5SA	0	0.119077	0.0520616
