# Supplementary material for: STRIPAK directs PP2A activity toward MAP4K4 to promote oncogenic transformation of human cells
Source: eLife journal article supplement (doi:10.7554/elife.53003), 2020-01-08
Supplement: supp [file elife-53003-supp-v1.zip]

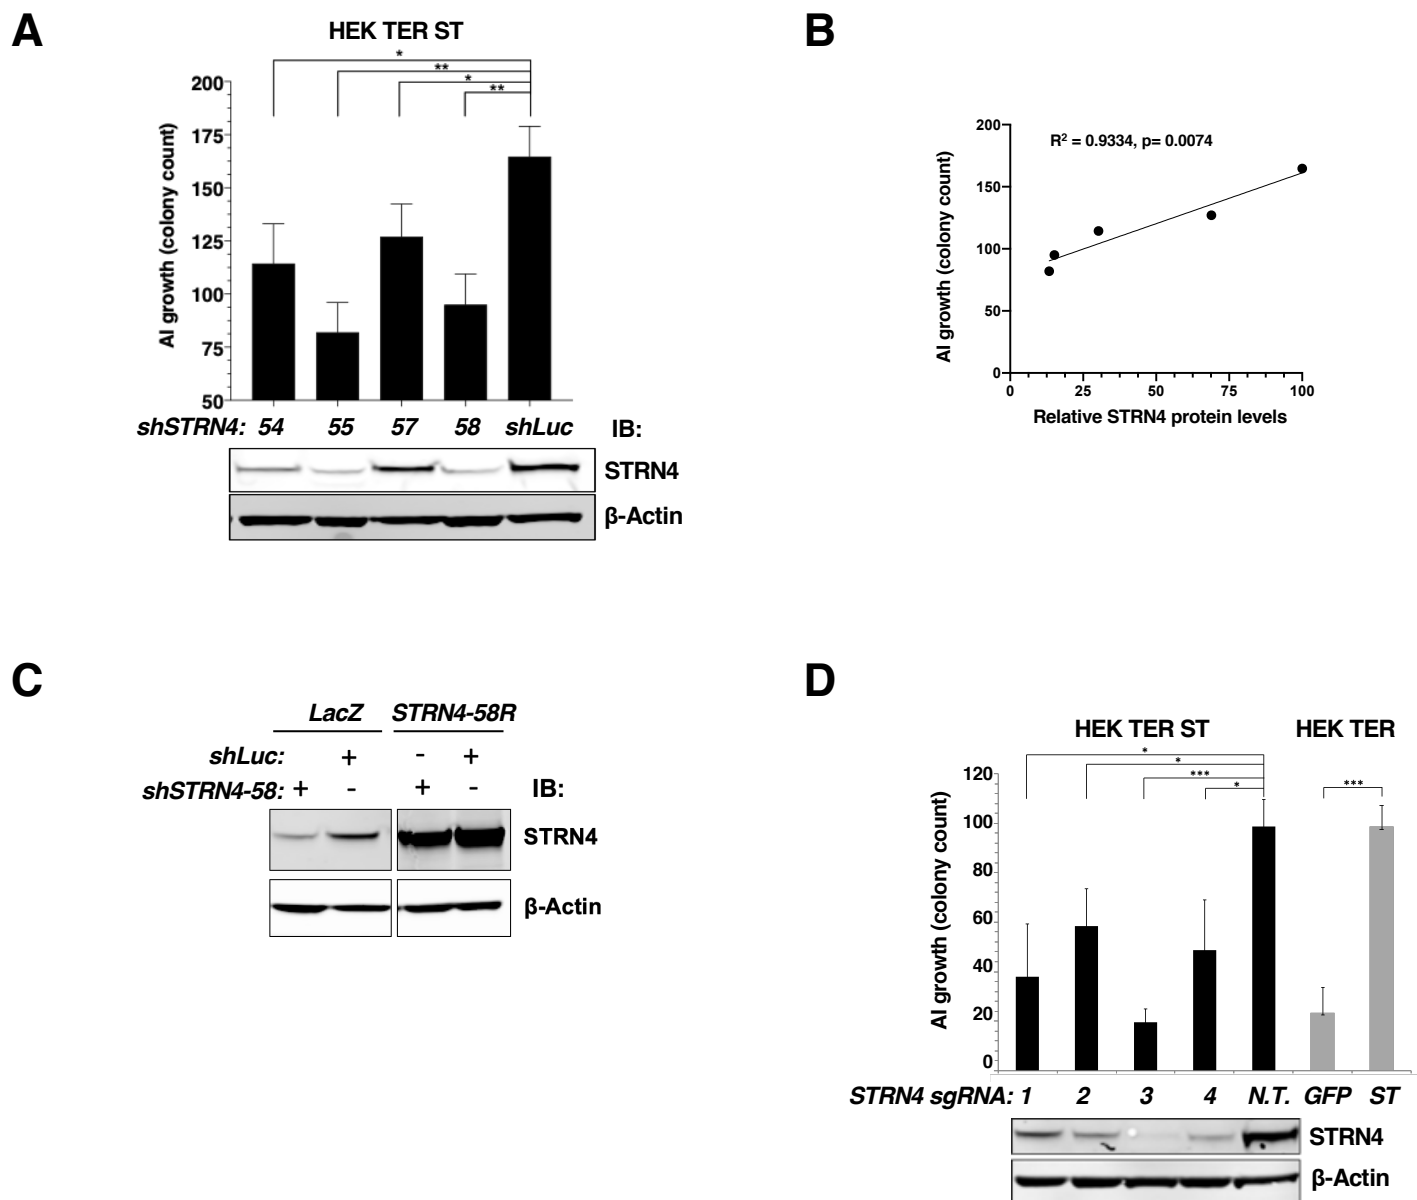

**Figure 5-figure supplement 1.** (A) AI colony count of HEK TER ST expressing 4 different *STRN4* shRNAs or *shLuc* control. Immunoblot below depicts corresponding STRN4 expression after knockdown. (B) Correlation between the relative STRN4 protein levels (quantified and normalized to *shLuc*) plotted on the x-axis, and AI colony counts on the y-axis. (Pearson Correlation Coefficient and the p-values are shown). (C) Immunoblot of STRN4 in HEK TER ST cells expressing an *shSTRN4-58-resistant STRN4* rescue construct (*STRN4-58R*) or *LacZ* control together with either *shSTRN4-58* or *shLuc* control. (D) Top. AI colony count of HEK TER ST cells upon CRISPR-Cas9 mediated editing of *STRN4* using 4 different sgRNAs or a Non-Targeting (N.T.) control sgRNA. For comparison, HEK TER cells expressing ST or GFP are included. Bottom. Immunoblot depicting STRN4 protein levels after STRN4 was edited using indicated sgRNAs (student's t-test: \* $p < 0.01$ , \*\* $p < 0.001$ , \*\*\* $p < 0.0001$ ).
