# Supplementary material for: STRIPAK directs PP2A activity toward MAP4K4 to promote oncogenic transformation of human cells
Source: eLife journal article supplement (doi:10.7554/elife.53003), 2020-01-08
Supplement: supp [file elife-53003-supp-v1.zip]

**A**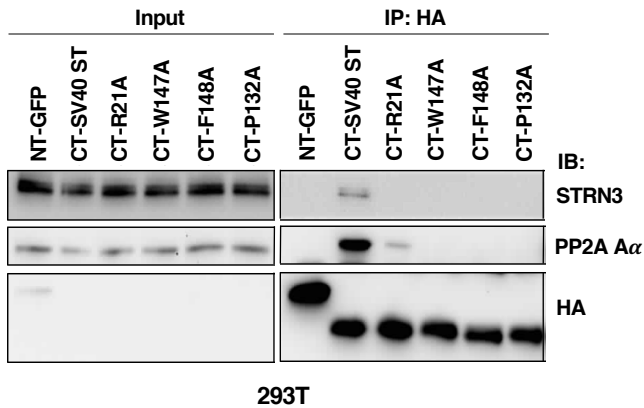**B**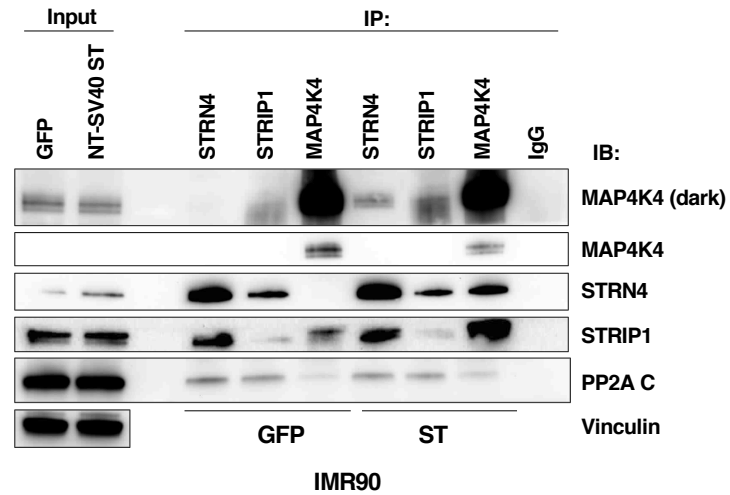**C**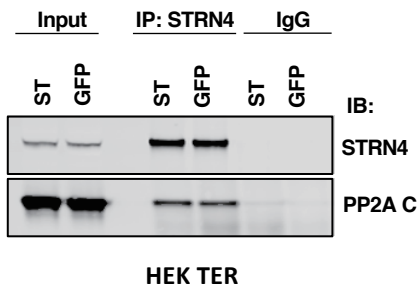

**Figure 3-figure supplement 1.** (A) Co-immunoprecipitation analysis in 293T cells of CTAP-tagged SV40 ST wild-type and PP2A binding mutants. Co-immunoprecipitation of STRN3 and A $\alpha$  is shown. (B) Co-immunoprecipitation analysis of STRN4, STRIP1, PP2A C $\alpha$  and MAP4K4 in IMR90 cells in the presence of SV40 ST or GFP. (C) Co-immunoprecipitation analysis of STRN4 and PP2A C subunit. (D) *In vitro* kinase assay of tandem-affinity purified MAP4K4 (Flag/HA) from HEK TER cells expressing either ST or GFP was performed and MBP was used as a substrate. HA and phospho-MBP were detected by immunoblotting.
