# Supplementary material for: STRIPAK directs PP2A activity toward MAP4K4 to promote oncogenic transformation of human cells
Source: eLife journal article supplement (doi:10.7554/elife.53003), 2020-01-08
Supplement: supp [file elife-53003-supp-v1.zip]

**A**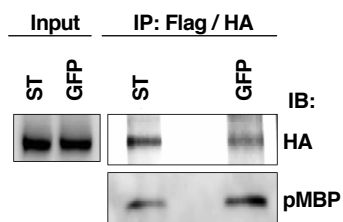**B**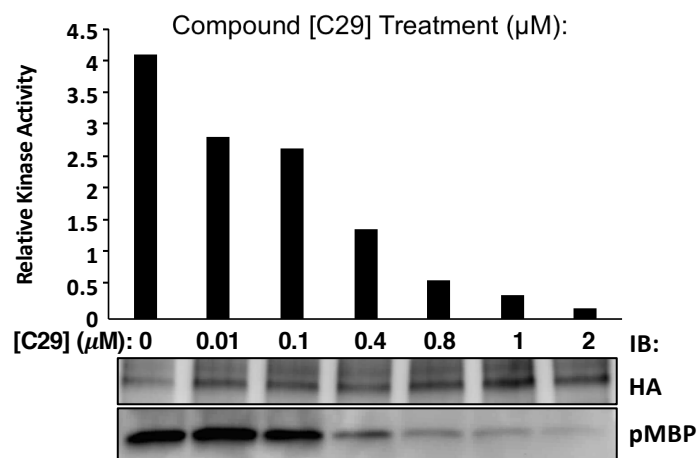**C**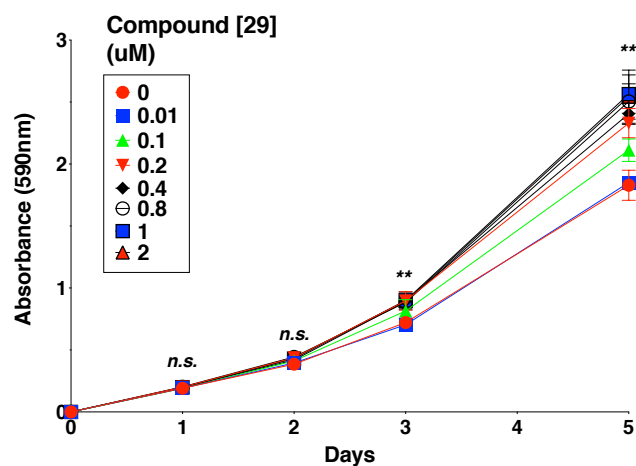**D**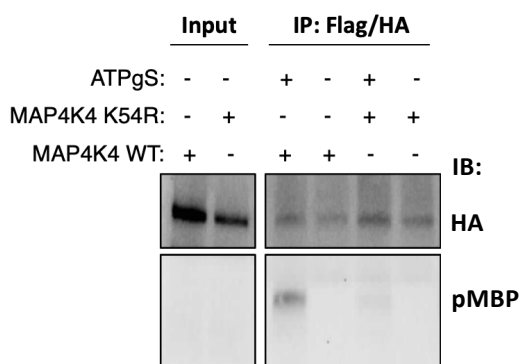**E**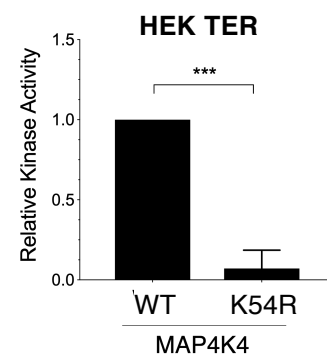

**Figure 4-figure supplement 1.** (A) *In vitro* kinase assay of tandem-affinity purified MAP4K4 (Flag/HA) from HEK TER cells expressing either ST or GFP was performed and MBP was used as a substrate. HA and phospho-MBP were detected by immunoblotting. (B) *In vitro* MAP4K4 kinase assay from HEK TER cells using increasing concentrations of the MAP4K4 inhibitor (Compound 29). MBP was used as substrate and phosphorylation determined by phospho-MBP immunoblotting (bottom). Quantification of relative kinase activity (top). (C) Proliferation of HEK TER cells was measured after exposure to compound 29 at the indicated concentrations. Student's t-test was performed based on absorbance values measured between 0  $\mu\text{M}$  and 1  $\mu\text{M}$  at 5 days. (D) Representative immunoblot showing MAP4K4 *in vitro* kinase assay using tandem-affinity purified wild-type (WT) or kinase-dead mutant (K54R) MAP4K4. (E) Mean MAP4K4 activity of WT relative to kinase-dead mutant (K54R) assessed using *in vitro* kinase assay (student's t-test: n.s.= not significant, \*\*p<0.001, \*\*\*p<0.0001).
