# Supplementary material for: STRIPAK directs PP2A activity toward MAP4K4 to promote oncogenic transformation of human cells
Source: eLife journal article supplement (doi:10.7554/elife.53003), 2020-01-08
Supplement: supp [file elife-53003-supp-v1.zip]

A

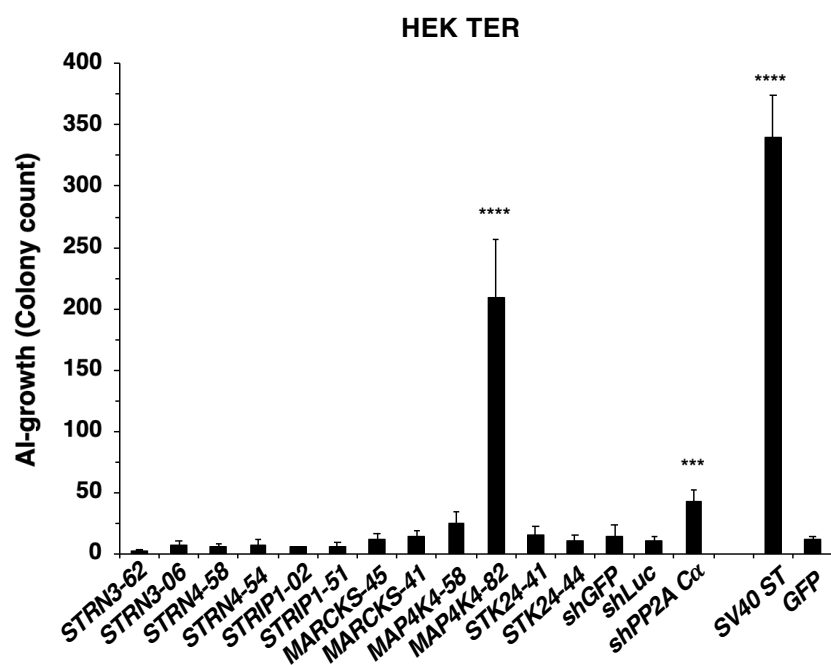

B

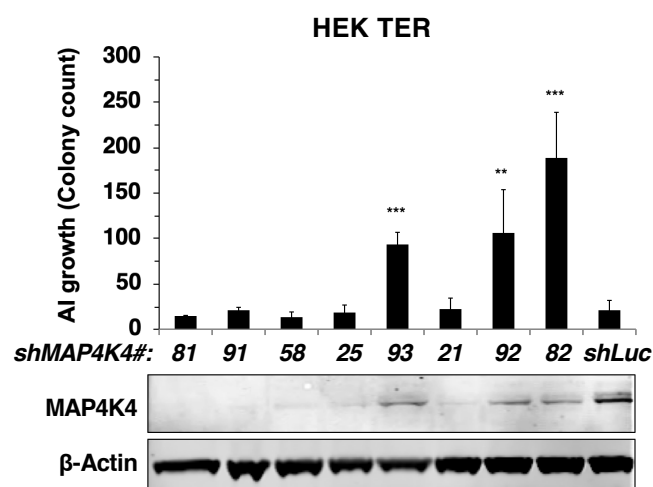

C

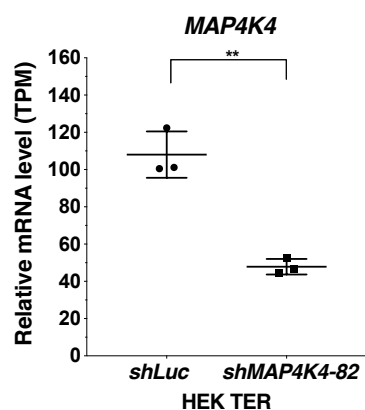

**Figure 2-figure supplement 1.** (A) AI colony count of HEK TER cells expressing the corresponding shRNAs or SV40 ST. Student's t-test was performed for each shRNA compared to *shLuc* control. (B) AI colony count of HEK TER cells expressing 8 different *MAP4K4* shRNAs and *MAP4K4* immunoblot showing the corresponding degree of *MAP4K4* knockdown. Student's t-test was performed against *shLuc* control. (C) mRNA levels of *MAP4K4* after knockdown using *shMAP4K4-82* as measured by RNAseq (Transcript Per Million). (student's t-test: \*\* $p < 0.001$ , \*\*\* $p < 0.0001$ , \*\*\*\* $p < 0.00001$ ).
