# Supplementary material for: STRIPAK directs PP2A activity toward MAP4K4 to promote oncogenic transformation of human cells
Source: eLife journal article supplement (doi:10.7554/elife.53003), 2020-01-08
Supplement: supp [file elife-53003-supp-v1.zip]

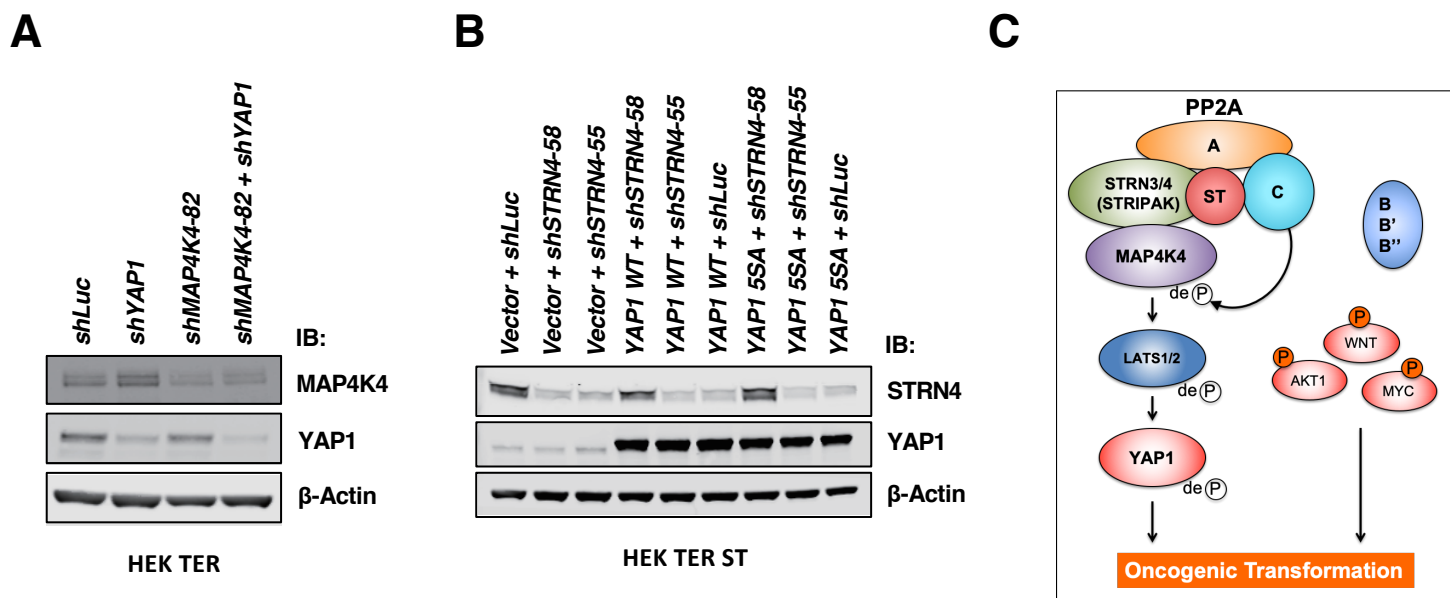

**Figure 8-figure supplement 1.** (A) Immunoblot depicting changes in MAP4K4 and YAP1 protein levels upon either depleting YAP1 alone, or in combination with MAP4K4. (B) Immunoblot depicting the overexpression of YAP1 WT or YAP1 S5A mutant, as well as suppression of *STRN4*. (C) Proposed model of ST-mediated transformation.
