# Supplementary material for: STRIPAK directs PP2A activity toward MAP4K4 to promote oncogenic transformation of human cells
Source: eLife. 2020 Jan 8;9:e53003. doi: 10.7554/eLife.53003 (PMC6984821; doi:10.7554/eLife.53003)
Supplement: Supplementary file 2. [file elife-53003-supp2.xlsx]

## Sheet: S2
Supplementary file 2. Normalized iTRAQ phosphoproteomic profiles of changes in phosphopetides upon suppression of PP2A Cα, Aα, B56γ or SV40ST expression.
HGNC Gene	SwissP ID	Phospho Events	Sites	Peptides	shCA1_Exp.1	shCA2_Exp.1	sh56-1_Exp.1	sh56-2_Exp.1	shAa_Exp.1	ST_Exp.1	shCA1_Exp.2	shCA2_Exp.2	sh56-1_Exp.2	sh56-2_Exp.2	shAa_Exp.2	ST_Exp.2
ATP2A2	P16615-4	1_Phospho	S636: Phospho	EFDELNPsAQR	0.57	0.6	-0.29	0.85	0.08	-0.6	0.71	0.57	0.16	0.66	-0.05	-0.62
FAM126A	Q9BYI3	1_Phospho	S321: Phospho	NAVTSMsIR	0.1	0.17	-0.14	0.17	0.18	-0.03	-0.03	-0.26	-0.72	-0.06	0.13	-0.04
TXLNA	P40222	1_Phospho	S515: Phospho	VQDLSAGGQGSLTDSGPERRPEGPGAQAPSsPR; RPEGPGAQAPSsPR	0.23	-0.18	0.03	-0.2	0.07	0.14	0.2	-0.1	0.2	-0.13	-0.17	-1
SRCAP	Q6ZRS2	1_Phospho	S1859: Phospho	SGPPsPPSTATSFGGPRPR	0.27	0.23	0.14	0.18	-0.08	-0.02	-0.18	-0.52	-0.67	-0.83	-0.56	0.13
LAMTOR1	Q6IAA8	1_Phospho	S98: Phospho	LAVLSSsLTHWK	0.37	0.36	0.04	0.18	0.02	1.17	0.39	0.71	-0.12	0.65	0.55	0.88
ACTN4	O43707	No Phospho		SFSTALYGESDL; ICDQWDALGSLTHSR; ASFNHFDKDHGGALGPEEFK	-0.05	-0.24	0.08	0.24	-0.22	-0.39	0.07	0.09	-0.06	-0.23	0.05	-0.22
DLG5	Q8TDM6	1_Phospho	S1263: Phospho	LGsSSNLQFK	-0.04	-0.91	-0.97	-0.52	0.12	0	-0.35	-0.4	-0.23	-0.12	-0.01	-0.9
TNIK	Q9UKE5	1_Phospho	S640: Phospho	QNsDPTSENPPLPTR	-0.26	0.44	0.31	0.22	0.18	0.09	0.12	0.01	0.06	-0.12	0.24	0.02
KRT19	P08727	1_Phospho	S22: Phospho	FGGLGGGsVR; QSSATSSFGGLGGGsVR	0.07	0.19	0.57	0.17	-0.59	0.98	-0.68	-0.14	0.52	-0.14	-0.45	0.09
AKAP12	Q02952	1_Phospho	S514: Phospho	MKVQGsPLKK; VQGsPLKK	-0.56	-0.34	0.31	-0.58	0.44	0.45	-0.87	-0.67	0.04	-1.38	0.47	0.71
LMNB1	P20700	1_Phospho	T20: Phospho	AGGPTtPLSPTR	0.27	-0.42	0.38	-0.08	0.01	-0.08	0	-0.83	-0.13	-0.43	-0.62	0.01
IRS2	Q9Y4H2	1_Phospho	S620: Phospho	LCPSCPASsPK	0.81	0.63	0.42	0.68	0.26	0.09	0.37	0.49	-0.09	0.23	0.08	0.33
MDC1	Q14676	1_Phospho	T1425: Phospho	LEPSTSTDQPVtPEPTSQATR	0.3	-0.09	0.65	-0.66	0.21	0.35	-0.42	-0.77	-0.98	-1	-0.96	0.15
PTPN13	Q12923-3	2_Phospho	S887: Phospho; S890: Phospho	AsFRsLNLQAESVR	-1.1	-0.43	-0.18	-0.43	-2.28	-0.51	-0.85	-0.23	-0.88	0.01	-1.66	0.23
PNKP	Q96T60	1_Phospho	T118: Phospho	TPESQPDtPPGTPLVSQDEK; TPESQPDtPPGTPLVSQDEKR	-0.05	0.86	1.01	0.53	0.22	0.33	0.05	-0.2	-0.32	-0.35	-0.12	-0.11
COIL	P38432	1_Phospho	S566: Phospho	LIIEsPSNTSSTEPA	0.67	-0.11	0.1	-0.02	0.33	0.4	0.29	-0.31	-0.64	-0.31	0.08	0.22
AHNAK	Q09666	1_Phospho	T553: Phospho	VDIETPNLEGTLtGPR	0.86	0.44	0.87	0.96	0.97	-0.47	0.69	0.39	1.04	0.53	0.64	-0.71
ACTB	P60709	No Phospho		DDDIAALVVDNGSGMCK	-0.1	0.07	0.38	0.44	0.12	-0.05	0.12	0.75	0.71	0.71	0.16	0.13
PML	P29590-4	1_Phospho	S403: Phospho	KAsPEAASTPRDPIDVDLPEEAER; KAsPEAASTPR	-0.41	0.38	-0.08	-0.29	0.35	-0.71	-0.04	0.35	0.05	-0.29	0.34	0.04
FER	P16591	1_Phospho	S423: Phospho	FEsIR	0.21	-0.02	0.08	0.4	0.27	-0.47	-0.57	-0.32	-0.22	0.3	0.02	-0.2
KIF2A	O00139-2	1_Phospho	S73: Phospho	TVAsIKNDPPSR	0.36	-0.06	-0.08	0.57	0.4	-0.25	0.11	0.28	0.06	0.6	0.35	0.61
DVL3	Q92997	1_Phospho	S700: Phospho	DLASVPPELTASRQsFR	0.39	0.56	0.64	0.74	0.5	-0.44	0.22	0.51	0.26	0.33	0.15	-0.22
PRDM2	Q13029-3	2_Phospho	S542: Phospho	TSSPPSsPQHSPALR	0.14	0.29	-0.28	0.13	0	0.18	0.2	-0.57	0.2	0.19	0.06	-0.68
LAS1L	Q9Y4W2	1_Phospho	S617: Phospho	MEVGPFSTGQEsPTAENAR	0.12	-0.6	0.3	-1.01	0	-0.07	-0.05	0.28	0.13	0.3	0.06	0.53
MARK2	Q7KZI7-8	1_Phospho	S619: Phospho	DQQNLPYGVTPAsPSGHSQGR	0.32	-1.28	0.6	-0.42	0.84	0.46	0.12	-0.11	0.35	-0.02	0.1	0.31
HSPB1	P04792	1_Phospho	S82: Phospho	QLssGVSEIR; QLsSGVSEIR; QLsSGVsEIR	-0.37	0.52	-0.09	0.14	1.03	0.54	-0.62	0.49	-0.08	-0.13	0.7	0.43
TBC1D25	Q3MII6	1_Phospho	S506: Phospho	QAsLDGLQQLR	0.05	0.04	-0.29	-0.19	-0.33	-0.1	-0.08	-0.05	0.21	-0.46	-0.59	-0.24
MSH6	P52701-2	1_Phospho		QSTLYSFFPKSPALSDANK; AAAAPGASPSPGGDAAWSEAGPGPRPLAR	0.59	0.35	0.68	0.81	0.21	0.29	0.46	0.48	0.69	0.42	0.57	-0.19
EML3	Q32P44	1_Phospho	T881: Phospho	VLGAGGAGPAPAtPSR	-0.09	0.17	-0.22	-0.17	0	0.13	-0.23	0.31	-0.04	-0.17	0.19	-0.02
MICAL3	Q7RTP6-4	1_Phospho	S899: Phospho	IELENYRLsLR	0.38	0.37	0.31	0.33	-0.1	-0.31	-0.49	-0.37	-0.83	-0.72	-0.71	0.02
MNAT1	P51948	1_Phospho	S279: Phospho	AAsPQDLAGGYTSSLACHR	0.36	0.3	0.23	0.6	0.21	0.06	0.3	0.43	0.37	0.57	0.4	0.51
ZMYND8	Q9ULU4	1_Phospho	S756: Phospho	QDVVGKTPPSTTVGSHsPPETPVLTR; TPPSTTVGSHsPPETPVLTR	-0.06	0.21	-0.01	0.16	-0.5	-0.03	-0.05	-0.16	-0.28	-0.02	-0.35	-0.06
NUP88	Q99567	1_Phospho	S517: Phospho	EDVEVAEsPLR; EDVEVAEsPLRVLAETPDSFEK	-0.12	0.03	-0.07	-0.15	-0.26	-0.05	-0.01	-0.02	-0.04	-0.04	-0.42	-0.07
DDX54	Q8TDD1	1_Phospho	S782: Phospho	QKIDDRDsDEEGASDR	0.1	-0.41	-0.19	-0.63	-0.58	0.48	0.04	-0.09	0.15	-0.13	-0.08	0.1
BCLAF1	Q9NYF8	1_Phospho	S496: Phospho	KETQsPEQVK; KETQsPEQVKSEK; ETQsPEQVKSEK; ETQsPEQVK	-0.28	-0.23	0.02	-0.37	-0.31	-0.11	-0.14	-0.03	-0.12	-0.03	0.03	0.18
SEPT2	Q15019	1_Phospho	S218: Phospho	IYHLPDAEsDEDEDFK; IYHLPDAEsDEDEDFKEQTR	-0.4	-1.05	-1.51	-0.25	-0.38	-0.22	0.81	1.11	1	1.13	0.89	-1.1
PCF11	O94913	1_Phospho	S494: Phospho	SPIIHsPK	-0.06	0.11	0.08	-0.02	-0.04	-0.1	0.15	-0.01	0.02	0.05	0.29	0.18
EIF4ENIF1	Q9NRA8	1_Phospho	S564: Phospho	APsPPLSQVF; sPPLSQVFQTR; APsPPLSQVFQTR	0.13	0.29	0.13	0.1	0	0.04	0.08	0.24	0.27	0.09	0.01	-0.02
TENC1	Q63HR2-6	1_Phospho	S1096: Phospho	HLPGPGQQPGPWGPEQASsPAR	1.01	1.11	0.12	0.76	0.9	2.37	-0.05	0.19	0.09	-0.27	0.21	0.13
STK10	O94804	1_Phospho	S13: Phospho	ILRLsTFEK	0.11	-0.33	0.24	0.11	0.21	0.15	0.39	0.1	0.28	0.01	0.39	0.58
PCBP2	Q15366-5	1_Phospho	S173: Phospho	QICVVMLETLSQsPPK	0.56	-0.38	0.1	-0.17	-0.05	0.04	-0.58	0.02	0.04	-0.21	-0.24	0.54
ARHGAP11A	Q6P4F7	1_Phospho	S847: Phospho	RINsLLEYSR; INsLLEYSR	-0.11	0.1	-0.43	0.21	-0.24	0.19	-0.45	0.27	-0.42	0.14	-0.27	-0.61
VIM	P08670	1_Phospho	S339: Phospho	QVQSLTCEVDALKGTNEsLER	0.14	-0.19	-0.25	0.11	0.05	0.05	0.64	0.41	0.47	0.11	0.46	-0.1
CREB1	P16220	1_Phospho	S142: Phospho	ILNDLsSDAPGVPR	-0.91	-0.59	-0.42	-0.05	-0.48	0.36	0.01	-0.13	0.18	0.26	-0.45	-0.16
CTAGE5	O15320-5	1_Phospho	S640: Phospho	FCSNSGRLsGPAELR	0.63	0.37	-0.36	0.2	0.41	-0.44	0.49	0.2	-0.09	-0.18	0.38	-0.67
PKM	P14618-2	1_Phospho	T41: Phospho	LDIDSPPItAR	0.7	0.68	0.51	0.42	-0.07	-0.08	0.62	0.6	0.78	0.57	0.45	-0.21
CEP170	Q5SW79-2	1_Phospho	S538: Phospho	STGSATSLAsQGER	-0.31	-0.04	-0.05	0	0.21	-0.3	0	0.07	-0.38	-0.3	0.14	0.19
ZC3HAV1	Q7Z2W4-3	1_Phospho	S327: Phospho	ATDLGGTSQAGTsQR	0.03	-0.29	-0.32	0.09	0.2	0.03	-0.25	-0.29	0.09	0.42	-0.23	-0.17
USP8	P40818	1_Phospho	S392: Phospho	SDVsPIIQPVPSIK	0.01	0.19	-0.35	0	-0.23	0.14	0.1	0.22	0.33	0.18	0.26	0.07
YAP1	P46937	1_Phospho	S61: Phospho	GDsETDLEALFNAVMNPK; GDsETDLEALF; GDsETDLEALFN	-0.26	-0.34	0.03	-0.08	0.12	-0.12	0.24	-0.23	0.2	0.26	0.32	-0.02
EIF4EBP1	Q13541	2_Phospho	S65: Phospho; T70: Phospho	NsPVTKtPPRDLPTIPGVTSPSSDEPPMEASQSHLR; FLMECRNsPVTKtPPR; NsPVTKtPPR; NsPVTKtPPRDLPTIPGVTSPSSDEPPMEAsQSHLR	0.15	0.48	0.24	0.31	0.24	0.15	-0.08	0.23	-0.07	0.29	-0.06	0.23
FOXK2	Q01167-2	1_Phospho	S398: Phospho	EGsPAPLEPEPGAAQPK	-0.07	0.04	0.64	-0.7	-0.3	-0.35	-0.23	0	-0.08	-0.17	-0.27	0.45
NOP56	O00567	1_Phospho	S520: Phospho	EELMSsDLEETAGSTSIPK; SFSKEELMSsDLEETAGSTSIPK; SFSKEELMSsDLEETAGSTSIPKR; EELMSsDLEETAGSTSIPKR	-0.51	0.07	-0.3	-0.04	-0.75	1.53	0.13	0.2	0.15	0.29	-0.04	0.38
GAS2L1	Q99501-2	1_Phospho	S297: Phospho	VCTFSPQRVsPTTSPR	0.11	0.57	-0.08	0.17	0.12	-0.68	0.03	0.78	0.1	0.05	-0.17	0.2
RP2	O75695	1_Phospho	S28: Phospho	QYsWDQR	0.36	0.5	-0.2	0.64	1	-0.48	0.11	-0.26	-0.05	0.11	0.34	-0.35
KRI1	Q8N9T8-2	1_Phospho	S174: Phospho	AFVEDsEDEDGAGEGGSSLLQKR; AFVEDsEDEDGAGEGGSSLLQK	1.18	0.84	1.09	0.9	0.74	0.3	0.49	0.37	0.34	0.54	0.48	-0.04
PI4K2A	Q9BTU6	1_Phospho	S462: Phospho	SSsESYTQSFQSR	0.16	0.3	-0.92	0.62	0.39	0.29	-0.25	-0.16	-1.1	-0.56	-0.05	-0.26
RERE	Q9P2R6-2	1_Phospho	T45: Phospho	tSPINEDIR	-0.37	0.16	-0.14	-0.28	-0.24	-0.11	-0.91	0.01	-0.45	-0.69	-0.69	0.04
MLTK	Q9NYL2	1_Phospho	S633: Phospho	YQQITPVNQsR; RPQVPIKYQQITPVNQsR	0.19	-0.2	0.39	0.26	0.57	-0.34	-0.05	0.13	0.2	0.04	0.44	0.02
UMPS	P11172-2	1_Phospho	S36: Phospho	FIQENVFVAANHNGsPLSIK	-0.24	-1	0.23	-1.22	0.46	0.3	-0.03	-0.03	0.25	-0.1	0.36	0.54
SH3PXD2A	Q5TCZ1-3	1_Phospho	S616: Phospho	GSSGDSDsPGSSSLSLTR	1.85	1.27	1.25	0.52	1.2	-0.3	0.68	0.22	-0.03	-0.34	0.64	-0.17
LMO7	Q8WWI1-4	1_Phospho	S964: Phospho	TPNNVVSTPAPSPDAsQLASSLSSQK	0.25	0.1	-0.22	0.16	0.42	-0.94	0.21	0.57	-0.03	0.75	-0.47	0.05
TNIK	Q9UKE5	2_Phospho	S678: Phospho; S680: Phospho	TTsIsPALAR	0.26	-0.6	0.15	0.48	0.6	0.13	-0.17	-1.49	0.09	-0.03	-0.23	-0.26
NCOR2	Q9Y618-4	1_Phospho	S2387: Phospho	SDHTLTsPGGGGK	-0.51	-1.06	-0.77	-0.25	-0.49	-0.2	0.53	0.83	0.91	1.08	0.65	-0.77
INVS	Q9Y283-2	1_Phospho	S614: Phospho	sPDSCRPQALPCLPSTQDVPSR	-1.56	0.13	0.72	-0.19	-0.61	0.06	-0.34	0.31	0.02	0.28	-0.68	0.52
ENSA	O43768-9	1_Phospho	S83: Phospho	YFDsGDYNMAK	-0.28	-0.03	-0.46	0.31	-0.47	0.13	-0.94	-0.13	0.15	0.41	-0.91	-0.89
SRSF10	O75494	1_Phospho	S158: Phospho	sHSDNDRFK	-0.32	-1.79	-1.52	0.3	0.24	0.39	2.46	2.17	2.42	2.58	2.68	-2.25
SVIL	O95425-2	1_Phospho	S494: Phospho	FSSSIENSDsPVR; TKPPLDHNASATDYKFSSSIENSDsPVR	-0.78	-0.87	-0.75	-1.15	-0.65	0.23	-0.51	-0.59	-0.6	-0.95	-0.74	0.04
RRBP1	Q9P2E9	1_Phospho	S135: Phospho	LASsPK	-0.34	0.06	-0.1	-0.81	-0.39	0.16	-0.71	0.37	-1.11	0.11	0.14	1.39
ZC3HC1	Q86WB0-2	1_Phospho	S374: Phospho	SMGTGDTPGLEVPSsPLRK; SMGTGDtPGLEVPSsPLRK; SMGTGDtPGLEVPSsPLR; SMGTGDTPGLEVPSsPLR	0.02	-0.09	0.06	0.22	0.11	0.18	0.02	0.11	-0.01	0.14	0.1	0.14
MAP1B	P46821	1_Phospho	S1899: Phospho	TsDVGGYYYEK; TTRTsDVGGYYYEK	0.02	0.32	0.06	0.11	0.42	0.81	-0.32	-0.89	0.9	-0.58	0.24	-0.54
C2CD3	Q4AC94-1	1_Phospho	S1829: Phospho	ELDFSsPGR	-0.47	-0.06	-0.05	-0.31	0.08	0.12	-0.06	0.26	0.48	0.13	0.3	-0.05
MTA1	Q13330	1_Phospho	S522: Phospho	LPEASQsPLVLK	0.07	0.25	-0.11	0.14	-0.17	0	0.07	0.18	-0.22	0.05	-0.23	0.13
AHNAK	Q09666	1_Phospho	S5448: Phospho	GPRIsAPNVDFNLEGPK; GPGVDVNLKGPRIsAPNVDFNLEGPK; IsAPNVDFNLEGPK; IsAPNVDFNLE	0.49	0.65	0.89	0.56	-0.32	-0.12	0.33	0.71	0.57	0.38	0.01	-0.03
SRRM2	Q9UQ35-2	1_Phospho	S780: Phospho	SLsGSSPCPK	0.09	0.56	0.26	0.02	-0.13	0.45	-0.04	0.89	0.57	0.95	-0.04	0.15
RFC1	P35251-2	1_Phospho	S312: Phospho	SSADKIGEVSsPK; IGEVSsPK	-0.32	-0.36	-0.05	-0.57	-0.04	0.05	-0.37	0.04	0.02	-0.08	0.12	0.52
AHNAK	Q09666	1_Phospho	T3716: Phospho	VDIDtPDINIEGSEGK	0.6	-0.31	0.64	-1.22	0.73	1.58	0.89	0.43	0.8	-0.14	0.57	1.18
ARHGEF12	Q9NZN5-2	1_Phospho	S41: Phospho	IAsHDFDPTGLVQR	0.25	0.04	-0.59	-0.41	0.34	0.25	-0.09	0.11	0.63	-0.08	0.24	-0.28
PDLIM2	Q96JY6-4	1_Phospho	S197: Phospho	AGDSAVLVLPPsPGPR	-0.83	-0.5	0.09	-0.48	-0.19	0.99	-0.79	-0.21	0.38	-0.05	-0.03	0
YTHDC1	Q96MU7-2	2_Phospho	S146: Phospho; T148: Phospho	AKsPtPDGSER	-0.11	-0.03	0.24	-0.09	-0.15	0.15	0.03	-0.32	0.01	-0.09	-0.03	-0.09
KRT8	P05787	1_Phospho	S258: Phospho	SLDMDsIIAEVK	-0.01	0.75	0.57	0.12	-0.46	0.45	0.37	1.19	0.55	0.6	-0.24	0.34
ARHGAP21	Q5T5U3	1_Phospho	T1701: Phospho	LIECDtLSR	1.1	-0.1	0.8	0.65	1.21	0.08	0.63	0.11	0.94	0.53	1.02	-0.03
SMTN	P53814-5	1_Phospho	S729: Phospho	KMGSIFDREDQAsPR; MGSIFDREDQAsPR	0.71	-0.1	0.24	0.24	0.53	2.07	0.19	-0.48	-0.13	-0.58	0.35	0.82
ZNF592	Q92610	1_Phospho	S348: Phospho	KSIKPSDsPR; SIKPSDsPR	-0.14	0.08	-0.06	0.11	-0.14	0.3	-0.17	-0.29	-0.27	-0.32	-0.41	0.09
AFAP1	Q8N556-2	1_Phospho	S752: Phospho	SGTSSPQsPVFR	-0.25	0.26	0.26	0.03	-0.66	0.52	-0.55	0.21	0.09	-0.29	-0.92	0.59
FCHO2	Q0JRZ9-3	1_Phospho	S354: Phospho	VSIGNItLsPAISR; VSIGNITLsPA; VSIGNITLsPAISR	-1.43	-0.55	-0.07	-0.2	0.35	-0.25	-1.55	-0.66	-0.07	-0.16	0.19	0.47
CLMP	Q9H6B4	1_Phospho	T372: Phospho	AFQtV	0.65	0.55	1.7	0.84	1.18	0	0.87	0.39	0.32	0.52	0.92	0.13
DMAP1	Q9NPF5	1_Phospho	T445: Phospho	DTIIDVVGAPLtPNSR	-0.07	-0.06	-0.02	0.22	0.04	-0.01	0.08	0.16	-0.1	0.09	-0.29	-0.05
EIF4ENIF1	Q9NRA8	1_Phospho	S670: Phospho	VTKsPAPVHR	-0.45	-0.12	-0.08	-0.38	-0.11	0.1	0.09	0.33	0.25	0.05	0.34	0.05
PCYT1A	P49585	1_Phospho		WPFSGKTSPPCSPANLSR	-0.21	0.31	-0.29	-0.34	-0.24	-0.58	0.23	0.59	0.26	-0.24	0.24	-0.2
HIST1H4A	P62805	No Phospho		TVTAMDVVYALKR; ISGLIYEETR; RISGLIYEETR; DAVTYTEHAK; DNIQGITKPAIRR; DNIQGITKPAIR; VFLENVIR	0	0.04	0.02	0.12	-0.18	-0.22	0.19	0.19	-0.03	0.15	-0.08	0.11
SRSF2	Q01130	2_Phospho	S189: Phospho; S191: Phospho	sRsPPPVSK	0	0.24	-0.21	-0.02	-0.1	0.19	-0.08	-0.52	0.19	-0.07	0.11	-0.19
RANBP2	P49792	1_Phospho	S1110: Phospho	NVSGIsFTENMGSSQQK	0.02	-0.09	-0.01	0.17	0.19	0.48	0.51	0.93	0.98	0.85	0.6	0.08
NUCKS1	Q9H1E3	2_Phospho	T179: Phospho; S181: Phospho	LKATVtPsPVK; ATVtPsPVK; LKATVtPsPVKGK; ATVtPsPVKGK	-0.54	-0.17	0.24	-0.17	-0.13	0	-0.4	0.08	0.41	0.19	0.06	0.36
ARHGAP29	Q52LW3	1_Phospho	S949: Phospho	ATsFEESERK; ATsFEESER	0.36	0.44	0.48	0.13	0.14	0.31	0.12	0.05	0.35	-0.13	0.12	0.12
PSMD2	Q13200	1_Phospho	S363: Phospho	FGGSGsQVDSAR	0.1	0.12	-0.08	-0.17	-0.15	-0.31	0.01	0.24	-0.26	-0.26	-0.28	0.04
SRRM1	Q8IYB3-2	2_Phospho	S634: Phospho; S636: Phospho	RVsHsPPPKQR; RVsHsPPPK; RRVsHsPPPK; VsHsPPPKQR; VsHsPPPK	-0.03	-0.35	-0.2	0.08	-0.31	0.29	0.19	-0.19	0.14	0.22	0.1	-0.1
SH3BP4	Q9P0V3	1_Phospho	S279: Phospho	SPAPEQFQsREDFR; SPAPEQFQsR	0.29	0.41	0.18	0.28	-0.3	0.56	0.12	0.33	-0.23	0.19	-0.47	0.88
ARHGAP35	Q9NRY4	1_Phospho	S589: Phospho	NQKNsLSDPNIDR	0.42	-0.32	-0.07	0	0.58	0.23	0.54	0.38	0.24	0.21	1.04	0.21
BPTF	Q12830-4	1_Phospho	S216: Phospho	sPILEEK; VHRPRsPILEEK	-0.34	-0.26	-0.35	-0.13	-0.29	-0.26	0.93	1.27	0.79	1.07	0.92	-0.31
EEF2	P13639	1_Phospho	T59: Phospho	FTDtRKDEQER	0.8	0.09	-0.97	-0.07	0.34	-0.13	0.21	0.01	0.39	-0.1	-0.23	-0.64
MAP2K2	P36507	1_Phospho	S226: Phospho	CDFGVSGQLIDSMANsFVGTR; LCDFGVSGQLIDSMANsFVGTR	0.17	0.41	-0.01	0	0.35	-0.3	0.27	0.45	0.27	0.21	0.94	-0.6
KRT8	P05787	1_Phospho	S475: Phospho	LVsESSDVLPK	0.18	-0.09	-0.36	-0.64	0.31	1.12	0.52	0.41	0.36	-0.01	0.72	0.93
EHBP1	Q8NDI1	1_Phospho	S759: Phospho	TSLsPTSK	0.05	-0.87	0.21	0.08	-0.84	-0.22	-0.03	-0.73	-0.07	0.12	-0.84	-0.03
OGFR	Q9NZT2-2	1_Phospho	S315: Phospho	KVEEEGsPGDPDHEASTQGR	0.56	0.42	0.9	0.27	0.5	-0.61	-0.05	0.1	-0.67	-0.68	0.33	0.14
SPTBN1	Q01082-3	1_Phospho	S2089: Phospho	RPPsPEPSTK	-0.42	-0.1	0	0.09	-1.38	-0.34	-0.38	-0.29	-0.31	-0.15	-1.08	-0.08
AHNAK	Q09666	1_Phospho	S5077: Phospho	VDVKsPK; APDVDVNIAGPDAALKVDVKsPK	-0.12	1.08	0.19	-0.02	-0.1	0.06	-0.37	0.12	0.35	0.06	0.33	0.18
SPATS2L	Q9NUQ6	1_Phospho	S455: Phospho	SQGsGNEAEPLGK; SQGsGNEAEPLGKGNSR	-0.15	0.47	0.1	0.2	0.02	0.44	0.34	0.14	0.86	0.2	0.63	0.06
TNKS1BP1	Q9C0C2-2	1_Phospho	S287: Phospho	VVGKPAQLGTQRsQEADVQDWEFR; sQEADVQDWEFR	0.03	0.52	-0.09	-0.74	0.08	0.37	0.51	0.21	0.56	-0.4	0.2	0.4
AHSG	P02765	1_Phospho	S138: Phospho	CDSSPDsAEDVRK	0.29	0.75	-0.11	1.69	0.99	-0.3	1.18	0.09	0.18	0.79	0.64	-1.79
STRN3	Q13033-2	1_Phospho	S229: Phospho	NLEQILNGGEsPKQK; NLEQILNGGEsPK	-0.04	-0.21	0.02	-0.24	0.13	0	-0.07	-0.07	0.05	-0.21	0.2	0.29
STMN1	P16949	2_Phospho	S16: Phospho; S25: Phospho	AsGQAFELILsPR; RAsGQAFELILsPR	0.22	-0.51	-0.17	-0.22	0.21	0.78	-0.28	-1.43	-0.29	-0.35	-0.27	0.21
ACD	Q96AP0-2	1_Phospho	S432: Phospho	TPSSPLQSCTPSLsPR	-0.02	1.02	0.35	-0.4	-0.48	-0.66	-0.88	-1.18	-1.86	-0.83	-0.93	0.3
SLCO4A1	Q96BD0	1_Phospho	S40: Phospho	ASPGTPLsPGSLR	-0.18	0.18	1.02	1.11	0.66	-0.62	-0.15	-0.03	0.21	0.51	0.35	-0.09
ZMYM3	Q14202	1_Phospho	S464: Phospho	TGsPGPELLFHEGQQKR; TGsPGPELLFHEGQQK	0.26	-0.28	-0.72	0.57	-0.09	0.03	0.06	0.17	-0.21	0.27	0.09	-0.11
PAICS	P22234	1_Phospho	S107: Phospho	IATGsFLKR; IATGsFLK	0.2	0.02	0.09	0.17	0.1	-0.38	-0.04	0.42	0.21	0.34	0.18	0.17
PIK3R2	O00459	1_Phospho	S263: Phospho	APPPPSsPPPGGAPDGSEPSPDFPALLVEK	-0.4	-0.5	-0.49	-0.16	-0.35	-0.77	0.02	0.64	0.14	0.63	-0.43	-0.38
PDHA2	P29803	1_Phospho	S291: Phospho	YHGHsMSDPGVSYR	0.21	-1	-0.54	0.22	-0.03	0.16	1.53	1.52	1.48	1.34	1.18	-0.46
CTNND1	O60716-2	1_Phospho	S47: Phospho	VRVsPQDANPLMANGTLTR	-0.85	-0.05	-0.13	-0.5	-0.8	0.57	-0.58	0.01	-0.3	-0.32	-0.56	0.4
DAB2	P98082	1_Phospho	S401: Phospho	SSPNPFVGsPPKGLSIQNGVK; SSPNPFVGsPPK	-0.07	-0.15	-0.11	0.13	-0.85	0.36	0.12	0.13	-0.16	0.37	-0.37	1.07
TAGLN	Q01995	1_Phospho	S186: Phospho	GAsQAGMTGYGRPR	0.24	-0.29	0.27	0.29	0.1	0.27	0.1	-0.14	0.2	-0.13	0.13	0.15
BCAS3	Q9H6U6-6	1_Phospho	S625: Phospho	LADAMAEsPSRDVVGSGTELQR; LADAMAEsPSR	0.33	0.52	-0.48	-0.03	0.07	0.11	0.52	0.8	0.22	0.49	-0.04	-0.51
CEP170	Q5SW79	1_Phospho	S1260: Phospho	LRTsPALK	0.37	-0.08	0.17	-0.24	0.56	0.56	0.22	-0.5	0.22	-0.67	0.44	0.42
SNTB1	Q13884	1_Phospho	S225: Phospho	LGGsTSDPPSSQSFSFHR	0.34	0.11	0.11	0.29	0.07	-0.11	0.11	-0.19	-0.16	-0.17	0.16	-0.15
HJURP	Q8NCD3-3	1_Phospho	S388: Phospho	GGPAsPGGLQGLETR	-0.17	-0.2	0.33	0.18	-0.54	0.18	-0.48	-0.32	-0.04	0.02	-0.39	0.36
MAP1B	P46821	2_Phospho	S1785: Phospho; T1788: Phospho	SDIsPLtPR	-2.73	-0.65	-0.2	-0.7	-0.08	-0.22	-3.35	-1.29	-0.15	-0.74	-0.07	-0.47
NOLC1	Q14978	1_Phospho	S698: Phospho	GGSISVQVNSIKFDsE; GSYRGGSISVQVNSIKFDsE	-0.07	0.02	0.01	-0.1	-0.08	0.43	0.05	0.18	0.16	-0.05	0.17	0.24
RIN2	Q8WYP3-2	1_Phospho	S415: Phospho	QAsFLEAEGGAK; KQAsFLEAEGGAK	0.46	0.33	0.71	0.33	1.08	-0.71	0.54	0.62	0.27	0.38	0.91	-0.49
PHF12	Q96QT6-4	1_Phospho	T257: Phospho	VLtPPQAAGDGILATTANQR	1.13	1.66	1.72	1.28	1.56	0.45	0.02	0.04	-0.15	0.17	-0.26	-0.06
VIM	P08670	1_Phospho	S49: Phospho	TYSLGSALRPSTsR	0.7	0.47	-0.07	0.06	0.45	0.15	0.69	0.2	-0.05	-0.21	0.22	0.06
ITPKB	P27987	1_Phospho	S43: Phospho	AVLsPGSVFSPGR; AVLsPGSVFsPGR	0.86	-0.81	-0.29	-0.19	0.46	-0.6	-0.16	-0.84	-0.27	-0.95	-0.12	0.12
BCLAF1	Q9NYF8	1_Phospho	S262: Phospho	NTPSQHsHSIQHSPER; NTPSQHsHSIQHsPER; TPSQHsHSIQHsPER	-0.23	0.08	-0.3	-0.16	-0.23	-0.19	-0.45	-0.19	-0.48	-0.11	0.17	-0.37
EIF4G3	O43432	1_Phospho	S1156: Phospho	GGsSKDLLDNQSQEEQRR; GGsSKDLLDNQSQEEQR	-0.55	-0.76	0.05	-0.83	-0.68	0.31	0.46	0.16	0.83	0.48	-0.01	-0.33
OCIAD1	Q9NX40-3	1_Phospho	S108: Phospho	KLENsPLGEALR; LENsPLGEALR	0.15	0.04	-0.1	-0.14	0.37	0.41	0.24	0.03	-0.17	-0.07	0.46	0.67
RING1	Q06587	1_Phospho	S38: Phospho	TPQEAIMDGTEIAVsPR	0.32	0.61	0.24	-0.98	0.68	0.24	-0.09	-0.16	-0.56	-0.06	-0.04	0.13
BCKDK	O14874	1_Phospho	S31: Phospho	sTSATDTHHVEMAR	-0.04	0.14	-0.21	-1.05	-0.2	-0.17	0.39	0.26	0.08	0.18	0.08	-0.03
RAB1A	P62820	1_Phospho	T75: Phospho	FRtITSSYYR	0.79	0.71	-0.38	0.87	0.95	0.09	0.15	-0.23	0.17	-0.37	0.72	-0.82
CARHSP1	Q9Y2V2	3_Phospho	S30: Phospho; S32: Phospho; S41: Phospho	ERsPsPLRGNVVPsPLPTR; sPsPLRGNVVPsPLPTRR; sPsPLRGNVVPsPLPTR; SRERsPsPLRGNVVPsPLPTR	-0.61	0.6	0.13	0.39	0.27	1.21	0.11	-0.84	0	0.2	0.32	-0.18
PKP4	Q99569	1_Phospho	S337: Phospho	VASPSQGQVGSSsPKR; VASPSQGQVGSSsPK	-0.03	0.09	0.22	-0.06	0.17	1.2	-0.83	0.25	0	0.03	-0.32	0.39
TUBGCP3	Q96CW5	1_Phospho	S896: Phospho	LRVsLGTR	0.44	-0.14	0.42	0.33	0.03	-0.14	0.18	0.06	0.19	0.02	-0.68	-0.22
OTUD4	Q01804	1_Phospho	S1005: Phospho	TAADVVsPGANSVDSR	0.16	-0.65	-0.02	-0.11	0.25	0.24	0.08	-0.57	-0.13	-0.17	0.21	0.23
SETD2	Q9BYW2-3	1_Phospho	S744: Phospho	KSEsPFRETEPLVSPHQDK; SEsPFRETEPLVSPHQDK	0.14	0.21	-0.16	0.21	-0.79	0.2	-0.03	0.27	0.06	0.23	-0.49	-0.18
CDC5L	Q99459	1_Phospho	S303: Phospho	SKLVLPAPQIsDAELQEVVK; LVLPAPQIsDAELQEVVK	-0.31	-0.29	-0.91	-0.19	-0.61	0.73	0.1	-0.16	0	-0.22	0.28	0.98
CHMP7	Q8WUX9	1_Phospho	S417: Phospho	IsDAELEAELEK	-0.04	0.08	-0.35	0.06	0.32	-0.28	0.32	-0.08	-0.22	0.19	0.53	0
RALGAPB	Q86X10-3	1_Phospho	T379: Phospho	LSMPQSAAVSTtPPHNR; LSMPQSAAVSTtPPHNRR	0.26	0.6	0.14	0.46	0.43	0.17	-0.63	-0.11	-0.26	-0.47	-0.25	0.53
TRIM28	Q13263-2	1_Phospho	S675: Phospho	LSPPYSsPQEFAQDVGR	0.12	-1.07	-0.28	-0.58	-0.12	1.31	-0.17	-0.57	-0.56	-0.14	-0.16	0.25
DLG5	Q8TDM6	1_Phospho		LGSSSNLQFK	0.42	0.13	-0.59	-0.14	0.35	-0.02	0.04	-0.35	-0.25	-0.12	0.26	-0.77
EPPK1	P58107	1_Phospho		QVSASELHTSGILGPETLR	-1.79	-0.85	0.33	0.21	-2.53	2.13	-1.62	-0.84	0.43	-0.31	-1.72	0.45
PRKCD	Q05655-2	1_Phospho	S676: Phospho	ARLsYSDK	0.31	-0.15	-0.01	-0.6	0.53	-0.42	0.5	0.2	-0.03	-0.32	0.61	0.11
VIM	P08670	1_Phospho	S55: Phospho	SLyAsSPGGVYATR; SLYAsSPGGVYATR; RSLYAsSPGGVYATR; SLYAssPGGVYATR	0.35	0.11	0.3	-0.15	0.45	0.52	0.52	-0.01	0.08	-0.38	0.4	0.38
NAV1	Q8NEY1-3	1_Phospho	S90: Phospho	QKsLTNLSFLTDSEKK; sLTNLSFLTDSEK; sLTNLSFLTDSEKK; QKsLTNLSFLTDSEK	0.33	-0.31	0.12	1.12	0.44	-0.2	0.02	0.3	0.26	0.57	0.46	0.29
BAIAP2	Q9UQB8	1_Phospho	S366: Phospho	SSsMAAGLER	0.21	0.11	-0.41	0.3	0.18	-0.01	0.42	0.33	0.54	0.35	0.15	-0.95
TJP1	Q07157	1_Phospho	S297: Phospho	DDISEIQSLAsDHSGR	0.09	-0.22	0.06	0.38	-0.08	0.11	-0.73	-0.11	-0.47	-0.22	-0.23	-0.33
SPEN	Q96T58	1_Phospho	S1194: Phospho	FGsPK	-0.08	-0.18	-0.27	-0.62	-0.59	-0.45	-0.15	-0.12	-0.33	0.11	-0.04	-0.05
C16orf59	Q7L2K0	1_Phospho	S159: Phospho	LLsVGDGTR	0.31	0.14	0.24	-0.12	1.31	0.38	0.14	0.04	0.15	-0.35	1.03	0.8
SLAIN2	Q9P270	1_Phospho	S147: Phospho	SVsPLVWCR	0.63	0.47	0.37	0.76	0.6	0	-0.83	-1.44	-0.23	-0.31	-0.98	0.3
BIN1	O00499-2	1_Phospho		GNKSPSPPDGSPAATPEIR; SPSPPDGSPAATPEIR; AQPSDNAPAKGNKSPSPPDGSPAATPEIR	0.24	0.02	0.25	-0.05	-0.21	-0.75	-0.12	0	0.43	0.63	-0.43	0.24
ENO2	P09104	1_Phospho	S40: Phospho	AAVPSGAsTGIYEALELR	0.19	-0.18	0.5	1.15	0.45	0.27	0.1	0.26	0.13	0.5	0.3	0.11
GTF2I	P78347	1_Phospho	S674: Phospho	sPGSNSK; sPGSNSKVPEIEVTVEGPNNNNPQTSAVR	0.11	0.06	0.37	-0.03	-0.61	-0.17	-0.01	-0.06	0.46	0.32	-0.26	-0.12
PRKCA	P17252	1_Phospho	T228: Phospho	STLNPQWNESFtFK	0.57	0.3	0.06	0.54	-0.3	-0.85	0.17	0.45	0.38	0.45	-0.26	-0.52
PLEC	Q15149-6	1_Phospho	S4493: Phospho	GYYSPYSVSGSGSTAGsR	0.47	0.43	0.65	0.24	0.19	-0.86	0.22	0.19	0.29	-0.04	0.03	-0.16
PCDH7	O60245-3	1_Phospho	S942: Phospho	SVNGGPGsPDLAR	-1.03	0.9	0.21	0.62	-1.06	0.38	-0.94	0.27	-0.77	0.2	-1.06	0.32
KIAA1522	Q9P206-2	1_Phospho	S39: Phospho	RAFsWLR; AFsWLR	-0.64	-0.08	-0.78	-0.51	-0.01	-0.02	-1.38	0	0.31	-0.57	0.11	-0.98
SOGA1	O94964	1_Phospho	S1017: Phospho	VYYsPPVAR	0.33	0.09	0.05	0.07	0.32	0	0.2	0.17	0.03	-0.06	0.38	0.1
KIAA0430	Q9Y4F3-3	1_Phospho	S1034: Phospho	SKsPVGNPQLIQFSR	-0.05	0.02	0.05	0.1	-0.12	-0.19	0.04	0.48	0.24	0.22	-0.08	-0.43
HOOK3	Q86VS8	1_Phospho	S238: Phospho	LNQSDSIEDPNsPAGR; LNQSDSIEDPNsPAGRR	-0.17	-0.08	0.02	-0.49	-0.08	0.5	-0.22	-0.04	0.04	-0.3	0.26	0.44
TRA2A	Q13595	1_Phospho	T202: Phospho	AHtPTPGIYMGRPTHSGGGGGGGGGGGGGGGGR; RAHtPTPGIYMGRPTHSGGGGGGGGGGGGGGGGR	0.32	-1.52	-0.86	0.88	0.5	0.24	0.93	1.06	1.06	1.09	0.7	-0.75
FRMD4A	Q9P2Q2	1_Phospho		LTPSRSQILR; SLSEIAIDLTETGTLK; TSNSYTAGGLFK; RFPSTGSCAEAGGGSNSLQNSPIR	0.68	-0.13	0.84	0.75	0.13	0.23	0.13	0.5	0.34	0.52	-0.39	0.42
NCOA3	Q9Y6Q9-2	1_Phospho	S728: Phospho	QEQLsPK; DTSSITSCGDGNVVKQEQLsPK	-0.07	0.12	-0.1	-0.4	-0.22	-0.23	0.15	0.4	-0.27	0.26	0.32	0.09
PGAM1	P18669	2_Phospho	S14: Phospho	LVLIRHGEsAWNLENR	0.76	0.18	0.6	0.17	-0.34	-0.48	0.82	0.7	0.69	0.47	0.41	-0.01
PTS	Q03393	1_Phospho	S19: Phospho	RIsFSASHR	0.1	0.52	0.01	0.28	0.12	-0.04	-0.51	-0.95	-0.59	-0.83	-0.51	-0.1
SRSF9	Q13242	1_Phospho	S211: Phospho	GsPHYFSPFRPY	-0.05	0.07	0.18	0.08	0.12	-0.28	0.09	0.12	-0.04	0.18	0.14	0.05
CDCA8	Q53HL2	1_Phospho	S219: Phospho	IYNISGNGsPLADSK	-0.07	0.43	0.38	0	-0.2	0.6	-0.02	0.14	0.2	0.12	0	0.43
MPZL1	O95297-2	1_Phospho	Y262: Phospho	SESVVyADIR	-0.71	0.56	-0.06	0.57	-0.42	0.57	-1.14	0.24	-0.96	0.17	-0.77	0.38
SMG6	Q86US8	1_Phospho	S203: Phospho	AEIEKsPGGGR	-0.3	0.01	0.08	-0.12	-0.07	-0.04	-0.39	-0.46	-0.78	-0.86	-0.59	0.07
ZFP36L1	Q07352	1_Phospho	S334: Phospho	LsISDD; RLPIFSRLsISDD; LPIFSRLsISDD	0.57	0.08	0.16	-0.27	0.77	0.22	0.38	-0.34	-0.32	-0.37	0.51	0.23
MICALL2	Q8IY33-5	2_Phospho	S446: Phospho; S448: Phospho	PASPGPSLPARsPsPPR	0.15	0.76	0.09	0.95	0.38	-0.16	-0.04	0.53	-0.89	0.54	0.17	0.08
THOC2	Q8NI27	1_Phospho	S1417: Phospho	KIDTHPsPSHSSTVK; IDTHPsPSHSSTVK; KIDTHPsPSHSSTVKDSLIELK	-0.51	-0.19	-0.47	-0.85	-0.99	0.39	0.28	0.1	0.08	0.14	-0.18	0.06
TNKS1BP1	Q9C0C2	1_Phospho	S1715: Phospho	SSGSEGSsPNWLQALK	-0.04	-0.47	-0.63	-0.94	0.25	0.53	0.31	-0.16	0.11	-0.96	0.04	-0.13
ZNF148	Q9UQR1	1_Phospho	S784: Phospho	AGMTSsPDATTGQTFG	-0.17	0.03	0.04	0.16	0	0.12	-0.27	0.54	0.2	0.18	-0.35	-0.08
AHNAK	Q09666	1_Phospho	T590: Phospho	GGVDVtLPR; VKGGVDVtLPR	0.61	-0.07	0.25	0.24	0.77	-0.42	0.45	0.24	0.42	0.04	0.64	-0.38
CTNND1	O60716-21	1_Phospho	S248: Phospho	GSLAsLDSLR; GSLAsLDSLRK	-0.56	0.13	-0.01	-0.08	-0.45	0	-0.76	-0.25	-1	-0.66	-0.67	0.23
ARHGEF40	Q8TER5-2	1_Phospho	T803: Phospho	ALSDPTtPL	-0.44	-0.8	-0.04	-1.39	0.34	0.43	-0.19	-1.31	-1.24	-0.4	0.05	0.35
DOCK10	Q96BY6	1_Phospho	S1232: Phospho	IYLKDLYPFTVNTsNQGSR; DLYPFTVNTsNQGSR	-0.15	-0.07	-0.2	-0.49	0.28	-0.29	0.22	-0.14	-0.34	-0.35	-0.53	-0.04
PSMA4	P25789	1_Phospho	S13: Phospho	TTIFsPEGR	0.07	-0.09	-0.02	0.47	0.31	0.71	-0.45	-0.22	-0.39	0.06	-0.07	0.36
LARP1	Q6PKG0-3	2_Phospho	S440: Phospho; S444: Phospho	QHYQKETEsAPGsPR	0.35	0.59	0.35	-0.1	0.28	-0.45	0.66	0.26	0.83	0.41	0.8	-0.66
IRS1	P35568	1_Phospho	S374: Phospho	sIPMPASR	0.22	0.19	0.41	-0.3	0.81	-0.2	0.09	0.03	0.44	-0.39	0.38	-0.02
KTN1	Q86UP2-3	1_Phospho		EIQNGNLHESDSESVPR	0.24	0.4	0.62	0.5	0.23	-0.59	0.17	0.41	0.06	0.14	0.31	-0.09
PCBP1	Q15365	1_Phospho	S264: Phospho	QQSHFAMMHGGTGFAGIDSSsPEVK	0.25	-0.12	-0.31	-0.54	0.09	0.36	0.21	0.42	0.19	0.01	0.09	0.22
FOXC2	Q99958	1_Phospho	S281: Phospho	TsPPGGELSPGAGR	0.03	-0.15	0.13	0.27	0.14	0.35	-0.16	-0.3	-0.06	0.3	-0.21	0.28
PRPF4B	Q13523	2_Phospho	S354: Phospho; S356: Phospho	RRsLsPKPR; sLsPKPR	0.05	0.17	0.11	0.07	0.08	0.44	0.02	-0.7	-0.24	0.04	0.15	0.12
HDGFRP2	Q7Z4V5	1_Phospho	S454: Phospho	sEGFSMDR; KRsEGFSMDR; RsEGFSMDR; sEGFSMDRK	-0.11	0.9	-0.24	-0.08	0.13	-0.38	0.29	0.4	0.02	0.44	0.24	0.01
AKAP12	Q02952	1_Phospho	T618: Phospho	MVtPK; KMVtPK	-0.85	-0.65	-0.04	-0.78	-0.38	0.35	-1.23	-0.91	-0.56	-0.74	-0.18	0.53
MTA1	Q13330	1_Phospho	S449: Phospho	SNMsPHGLPAR	-0.39	-0.43	-0.23	-0.33	-0.44	-0.31	0.67	0.18	0.18	0.13	0.01	0.12
ZC3HAV1	Q7Z2W4-3	1_Phospho	S387: Phospho	SsLGSLQTPEAVTTR	1	0.4	0.59	0.13	0.61	0.09	0.7	0.48	0.17	0.2	0.64	0.28
VIM	P08670	1_Phospho	S214: Phospho	QDVDNAsLAR; EEAENTLQSFRQDVDNAsLAR; LQEEMLQREEAENTLQSFRQDVDNAsLAR	0.38	0.09	-0.22	0.17	-0.04	-0.34	0.33	-0.26	-0.23	-0.57	-0.13	-0.11
PCM1	Q15154	1_Phospho	S370: Phospho	QAEsLSLTR	0.32	-0.22	-0.41	0.48	0.29	0.89	0.66	0.08	0.47	0.32	0.21	-0.19
CDC42EP1	Q00587-2	1_Phospho	S73: Phospho	GDFRHTMHVGRGGDVFGDTSFLSNHGGSSGsTHR; GGDVFGDTSFLSNHGGSSGsTHR	0.12	-0.32	-0.34	0.16	-0.86	-0.28	-0.01	0.04	-0.3	0.11	-0.41	0.01
TNRC18	O15417	1_Phospho	S999: Phospho	AsPVAALK	-0.57	0.74	0.04	0.46	0.79	0.15	-0.67	-0.1	-1.27	-0.79	-0.66	0.37
ZEB1	P37275-2	1_Phospho	S323: Phospho	TSQCSSPSLSASPGsPTRPQIR	0.76	0.62	0.69	0.56	1.09	0.05	0.54	-0.08	0.39	0.41	0.64	-0.14
NCOR2	Q9Y618-5	1_Phospho	S67: Phospho	RPsLLSEFQPGNER	0.39	0.48	0.66	1.05	-0.88	-1.94	0.32	0.39	0.49	0.83	0.32	-0.27
COPE	O14579-3	1_Phospho	S99: Phospho	RDsIVAELDR; RDsIVAELDREMSR	0.39	1.34	0.84	1.13	-0.21	-0.01	0.48	1.34	1.09	1.13	-0.27	-0.19
SRSF11	Q05519	1_Phospho	S207: Phospho	LNHVAAGLVsPSLK	0.06	-0.48	-0.6	0.36	-0.08	0.15	0.63	1.03	0.74	0.88	0.61	-0.94
IRF2BPL	Q9H1B7	1_Phospho	S547: Phospho	KAsPEPPDSAEGALK; KAsPEPPDSAEGALKLGEEQQR	0.37	0.18	0.1	0.58	-0.02	-0.09	0.13	-0.09	-0.14	0.17	0.16	-0.07
AHNAK	Q09666	1_Phospho	S5865: Phospho	LSSsSSNDSGNK	0.05	0.2	0.54	0.17	-0.75	-0.29	-0.73	-0.15	0.36	-0.11	-0.76	0.09
ABLIM3	O94929-3	2_Phospho	S326: Phospho; S332: Phospho	QGMsPTFSRsPHHYYR	-0.49	-0.4	1	-0.37	-0.22	0.1	-0.9	-1.53	-0.61	-0.88	-0.06	1.02
CDK17	Q00537-2	1_Phospho	S146: Phospho	RLsLPADIRIPDGYLEK; RLsLPADIR; LsLPADIR	0.44	0.06	0.16	-0.09	0.4	0.33	0.42	0.4	0.04	0	0.53	0.71
RPS6KB1	P23443-2	1_Phospho	S418: Phospho	FIGsPR	-0.23	0.06	-0.02	-0.07	0.11	-0.03	-0.29	0.03	-0.67	-0.22	-0.22	0.47
DCDC2	Q9UHG0	1_Phospho	S247: Phospho	ASSLPPIVGsRK; ASSLPPIVGsR	0.01	-1.25	0.11	-0.23	-1.24	0.95	-0.77	-1.59	-0.52	-0.82	-1.68	0.36
TAOK1	Q7L7X3-3	1_Phospho	S421: Phospho	ASDPQsPPQVSR	-0.26	-0.12	-0.2	0.15	0.11	0.21	-0.34	-0.21	-0.37	-0.02	0.02	0.02
DHX9	Q08211	1_Phospho	S449: Phospho	RIsAVSVAER	0.7	1.37	0.97	0.81	0.17	0.06	0.09	0.35	0.33	-0.16	-0.84	0.41
TIMM50	Q3ZCQ8-2	No Phospho		LATPPR	0.6	0.34	-0.25	-0.13	0.7	-0.03	0.42	0.55	0.31	0.03	0.59	-0.43
PTRF	Q6NZI2-3	1_Phospho		RGSSPDVHALLEITEESDAVLVDKSDSD; GSSPDVHALLEITEESDAVLVDK; SFTPDHVVYAR; RGSSPDVHALLEITEESDAVLVDK	0.84	0.54	0.48	0.43	0.26	0.27	0.85	0.45	0.51	0.52	0.04	0.69
NCOR2	Q9Y618-5	1_Phospho	T1374: Phospho	EGtPPPPPPSR; REGtPPPPPPSR	0.01	0.34	0.15	0.33	0.03	-0.2	-0.19	0.17	0.17	0.1	-0.08	-0.17
CENPL	Q8N0S6-2	2_Phospho	S39: Phospho; T43: Phospho	QSsFILtPPRR; KQSsFILtPPRR	0.03	-0.04	-0.87	0.06	-0.17	0.32	0.26	-0.14	-0.01	0.21	-0.27	0.48
AEBP2	Q6ZN18	1_Phospho	S24: Phospho	LSPLPPGsPGSAAR	-0.35	0.73	0.28	0.14	-0.07	-0.08	-1.05	-1.06	-1.18	-1.52	-0.89	0.14
LHX1	P48742	1_Phospho	S254: Phospho	HAFFRsPR	-0.65	-0.88	-0.34	-0.57	-0.01	0.18	-0.24	-0.08	0.31	-0.23	0.27	-0.13
PSD3	Q9NYI0	1_Phospho	S1012: Phospho	SHSsPSLNPDTSPITAK	-0.6	-1.22	-0.4	-0.08	-0.24	-0.03	0.9	0.99	0.96	1.19	0.98	-0.22
FAM122A	Q96E09	2_Phospho	S143: Phospho; S147: Phospho	IDFIPVsPAPsPTR; RIDFIPVsPAPsPTR	-0.07	-0.09	-0.44	-0.44	-0.13	-0.02	0.04	0.5	-0.08	0.28	0.09	0.12
WDR62	O43379-4	1_Phospho	S1233: Phospho	SIsLGDSEGPIVATLAQPLR	0.04	0.85	0.99	0.24	0.64	-1.14	0.14	0.37	0.08	0.03	0.37	0.45
VIM	P08670	1_Phospho	S459: Phospho	TVETRDGQVINETsQHHDDLE; DGQVINETsQHHDDLE; DGQVINEtsQHHDDLE	0.37	0.14	0.34	0.15	0.07	0.4	0.13	-0.3	0.12	-0.3	-0.16	0.04
TP53BP1	Q12888-2	2_Phospho	S644: Phospho; S645: Phospho	SEALssVLDQEEAMEIK	0.12	0.63	0.29	0.23	-0.39	0.52	0.47	-0.94	-0.29	-0.04	-0.34	0.62
STX1A	Q16623	1_Phospho	S14: Phospho	TAKDsDDDDDVAVTVDRDR	-0.76	-0.87	0.08	-0.05	-0.51	0.57	0.09	-0.68	0.06	0.14	0.41	-0.24
GPR161	Q8N6U8-3	1_Phospho	S298: Phospho	SsVTFEDEVEQIKEAAK; SsVTFEDEVEQIK	0.6	0.26	1.08	0.62	0.22	-1.02	0.15	0.19	-0.1	0.22	-0.1	-0.05
FOXJ1	Q92949	No Phospho		IDPQYAER	0.78	1.32	-0.02	0.52	0.62	0.4	-0.31	-0.24	0.04	0.36	0.33	-0.02
NAV1	Q8NEY1-3	1_Phospho	S1823: Phospho	LYHLPPPTVGPHSIAsPPEDR	0.21	1.01	-0.66	0.7	-0.54	0.23	0.58	-0.06	0.19	0.15	0.08	-0.51
ATG16L1	Q676U5-5	1_Phospho	S124: Phospho	sVSSFPVPQDNVDTHPGSGKEVR; sVSsFPVPQDNVDTHPGSGK; sVSSFPVPQDNVDTHPGSGK	0.05	-0.26	0.29	-0.65	0.82	0.05	0.2	0	0.21	0.15	0.63	0.22
ZNF318	Q5VUA4	1_Phospho	S2101: Phospho	IPsPNILK	-0.25	-0.06	-0.03	-0.06	-0.16	-0.37	-0.17	0.13	0.14	0.2	0.21	0.03
OFD1	O75665-3	1_Phospho	S859: Phospho	RQsNLQEVLER	0.67	0.43	-0.07	1.09	0.33	-1.07	1.27	0.47	0.85	1	0.18	-0.8
RPL23A	P62750	1_Phospho	S43: Phospho	TsPTFR; IRTsPTFR	-0.06	0.24	0.1	0	-0.09	0.21	-0.38	0.14	-0.67	-0.01	-0.31	0.88
SACS	Q9NZJ4-2	1_Phospho		DSAPSTPTSPTEFLTPGLR	-0.67	-0.79	-0.18	0.45	0.05	-0.05	-0.4	-0.64	-0.68	-0.33	0.12	0.21
SHROOM1	Q2M3G4-2	1_Phospho	S188: Phospho	SAsLSHPGGEGEPAR	0.12	0.28	0.08	0.11	0.48	0.03	-0.48	-0.39	-0.49	-0.91	0.11	0.14
ZCCHC8	Q6NZY4-2	1_Phospho	T241: Phospho	GtPPPVFTPPLPK	0.25	0.01	-0.25	0.25	-0.3	-0.54	0.05	0.15	0.06	0.35	-0.25	-0.04
ARFGEF3	Q5TH69	1_Phospho	S1991: Phospho	AGGGDLLLPPsPK	-0.66	-0.01	0.63	-0.11	-0.57	0.04	-0.52	0.18	0.03	-0.29	-0.23	0.44
GSG2	Q8TF76-2	1_Phospho	S147: Phospho	DSGRLsPDLSVCGQPR	-0.23	-0.16	0.01	0.08	-0.95	0.09	-0.27	-0.16	-0.1	-0.16	-0.88	0.51
MTFR1	Q15390	1_Phospho	S119: Phospho	QIsLPDLSQEEPQLK	-0.69	0.55	0.24	-0.66	-0.14	-0.18	0.43	0.35	-0.6	-0.39	-0.05	0.36
NRK	Q7Z2Y5	1_Phospho	S718: Phospho	LELsDLEAR	-0.28	-0.04	-0.32	0.54	-0.67	0.65	-0.36	-0.3	-1.11	0.35	-0.61	1.16
PPIG	Q13427	1_Phospho	S546: Phospho	sRECDITK	-0.74	0.19	-0.28	-0.25	0.01	-0.09	-0.21	-0.61	-0.85	-0.51	-0.08	0.58
MARCKS	P29966	1_Phospho	S167: Phospho	SFKLsGFSFKK; SFKLsGFSFK	-0.6	-0.13	-0.05	-0.31	-1.09	1.12	0.53	0.17	0.19	-0.14	0.57	1.15
RRAS2	P62070	1_Phospho	S186: Phospho	KFQEQECPPsPEPTR; FQEQECPPsPEPTR; FQEQECPPsPEPTRK; KFQEQECPPsPEPTRK	-0.05	0.56	0.77	0.63	0.2	0.87	-0.46	0.04	-0.14	0.1	-0.01	1.17
DSN1	Q9H410-4	1_Phospho	S52: Phospho	KGGNCDLsHQER	0.37	0.25	0.72	0.71	0.42	0.51	0.19	-0.35	0.28	-0.13	-0.3	-0.07
FSCN1	Q16658	1_Phospho	S39: Phospho	VNASASsLK	0.22	0.07	0.26	-0.08	0.25	-0.57	-0.02	0.12	-0.02	-0.05	0.1	0
KIAA1462	Q9P266	1_Phospho	S1304: Phospho	GQAGLPGGLVsPGSGDR	0.07	0.12	0.52	0.72	0.02	-0.26	-0.19	-0.28	-0.57	0.21	-0.96	0.25
ADCY9	O60503	1_Phospho	S1257: Phospho	VIPQHQLsISPDIR	0.95	1.07	1.24	1.55	0.22	-0.08	0.37	0.89	0.38	0.77	0.17	0.01
SCAF1	Q9H7N4	2_Phospho	S498: Phospho; S500: Phospho	QRsPsPAPAPAPAAAAGPPTRK; QRsPsPAPAPAPAAAAGPPTR; sPsPAPAPAPAAAAGPPTR	-0.34	0.2	-0.19	0.01	-0.23	0.19	0.17	-0.17	-0.03	-0.28	0.15	-0.1
RALGAPA1	Q6GYQ0-5	1_Phospho	S740: Phospho	SATTTGsPGTEK	0.06	0.17	0.08	-0.13	-0.3	0.06	-0.14	-0.41	-0.07	-0.27	-0.28	-0.15
HIST1H1D	P16402	1_Phospho	T147: Phospho	KVAGAAtPK; KVAGAAtPKK; VAGAAtPK	0.18	0.01	0.58	0.19	-0.65	-0.08	0.32	-0.16	0.34	0.41	-0.26	0.2
GPATCH8	Q9UKJ3	1_Phospho	S758: Phospho	sLPAEEGSSGK	-0.41	0.13	-0.04	0.07	-0.3	-0.35	-0.25	0.22	-0.01	0.37	-0.1	0.49
LARP4B	Q92615	2_Phospho	S516: Phospho; S533: Phospho	FTSSQTQsPTPPKPPSPSFELGLSsFPPLPGAAGNLK	-0.3	-0.27	0.02	-0.44	-0.22	1.63	0.03	0.34	0.19	0.21	0.02	0.23
ATXN1	P54253	1_Phospho	S88: Phospho	ALSTGLDYsPPSAPR	-0.08	-0.42	0.35	0.55	0.23	0.48	-0.02	-0.42	0.19	0.28	-0.28	0.09
COBLL1	Q53SF7-4	1_Phospho	S356: Phospho	AGSLQLSSMSAGNSsLRR	-1.03	-0.02	0.58	-0.48	-0.95	-0.05	-0.79	0.15	0.58	-0.36	-0.55	-0.16
DDX3X	O00571-2	1_Phospho	S66: Phospho	GKsSFFSDR	0.6	0.04	0.39	0.68	0.41	-0.3	0.51	0.61	0.79	0.87	0.89	-0.11
MAPRE1	Q15691	1_Phospho	S156: Phospho	KPLTSsSAAPQRPISTQR	-0.07	0.91	0.28	0.44	0.48	1	0.15	0.08	-0.13	-0.67	0.76	1.26
C2orf54	Q08AI8	1_Phospho	S383: Phospho	sPPPR	-0.24	0.31	-0.2	-0.24	-0.2	-0.22	0.08	0.18	-0.35	0.3	0.06	2.46
ZNF185	O15231-3	1_Phospho	S64: Phospho	ATsFSSAGEVPKPRPPSTR	-0.36	-0.43	0.03	-0.29	0.92	0.63	-0.81	0.05	0.49	0	0.82	0.48
SF1	Q15637-6	2_Phospho	S80: Phospho; S82: Phospho	TGDLGIPPNPEDRsPsPEPIYNSEGKR; sPsPEPIYNSEGKR; sPsPEPIYNSEGK; TGDLGIPPNPEDRsPsPEPIYNSEGK	-0.29	0.77	0.19	0.32	0.54	-0.06	0.26	-0.18	0.21	0.41	0.32	-0.96
SETD2	Q9BYW2-3	1_Phospho	S624: Phospho	LNDsPTLKK; LNDsPTLK	-0.06	-0.01	-0.48	0.29	-0.09	-0.82	0.13	0.16	0.25	0.18	-0.4	-0.36
ATXN2	Q99700-2	1_Phospho	S784: Phospho	GIsPVVSEHRK; GIsPVVSEHR	0.54	-0.12	0.34	-0.3	-0.1	0.24	0.15	0.01	-0.28	-0.13	-0.02	0.54
HSP90AB1	P08238	1_Phospho	S255: Phospho	IEDVGsDEEDDSGKDK; IEDVGsDEEDDSGK; IEDVGsDEEDDSGKDKK; IEDVGsDEEDDsGKDK; IEDVGsDEEDDSGKDKKK	-0.5	1.29	3.48	-0.12	0.65	-2.73	-0.33	-0.73	-0.16	-0.19	-0.06	-0.13
RREB1	Q92766	1_Phospho	S1167: Phospho	ANsGGVDLDSSGEFASIEK	0.34	-0.24	-0.85	0.35	-0.07	0	0.1	-0.33	-0.13	-0.16	-0.21	-0.27
PATL1	Q86TB9	1_Phospho	S179: Phospho	StsPIIGsPPVR; STsPIIGSPPVR	-0.04	-0.17	-0.67	0.21	0.04	-0.08	0.21	-0.01	0.11	0.34	0.21	-0.56
CHAMP1	Q96JM3	2_Phospho	S445: Phospho; S452: Phospho	KPSGsPDLWKLsPDQR; KPSGsPDLWKLsPDQRK	0.09	-0.05	0.54	0.34	0.13	0.28	0.26	-0.35	0.35	0.24	0.11	0.35
TAF6L	Q9Y6J9	1_Phospho	S501: Phospho	KMPQLTASAIVSPHGDEsPR	0.03	-0.04	-0.13	0.29	0.19	-0.15	-0.18	0.21	-0.41	-0.2	-0.21	0.23
AHNAK	Q09666	1_Phospho	S212: Phospho	LPSGsGAASPTGSAVDIR; LPSGsGAAsPTGSAVDIR	0	0.2	0.19	-0.44	-0.21	-0.07	-0.3	0.25	-0.03	-0.12	-0.05	0.17
SPATS2L	Q9NUQ6	1_Phospho	S526: Phospho	QHAADTSEARPFRGsVGR	0.41	-0.67	-0.39	0.04	0.13	0.43	1.25	0.74	1.33	1.05	1.37	-0.48
RBMX2	Q9Y388	1_Phospho	S314: Phospho	ERESsNPSDRWR; ESsNPSDRWR	-0.23	0.05	-0.56	0.03	-0.11	0.09	0.06	-0.21	0.01	-0.19	0.1	-0.34
SHC3	Q92529-2	1_Phospho	S351: Phospho	AAsVECISPVSPR	-0.15	-0.4	-0.16	-0.73	0.82	0.17	-0.22	-0.82	0.14	-0.84	0.25	-0.04
TBC1D10A	Q9BXI6-2	1_Phospho	S18: Phospho	APAAGEsLSGTR	0.37	0.21	0.64	0.45	-0.07	-0.44	0.45	0.28	0.59	0.28	0.09	0
RHBDF1	Q96CC6	1_Phospho	S76: Phospho	QTsITQTIR	1.3	0.79	-0.3	0.75	0.74	-0.55	1.64	0.91	0.2	0.87	0.89	-1.22
USP39	Q53GS9	1_Phospho	S46: Phospho	EPEAASSRGsPVR; EPEAASSRGsPVRVK; EREPEAASSRGsPVR	-0.11	0.01	0.07	0.09	-0.05	-0.11	0.31	-0.69	0.29	0.26	0.34	0.56
PTTG2	Q9NZH5	1_Phospho	S165: Phospho	LFQLGPPsPVK	-0.13	-0.09	0.35	0.15	0.11	0.02	-0.04	0.14	0.31	0.29	0.11	0.46
PAK2	Q13177	1_Phospho	S58: Phospho	IISIFsGTEK	1.13	1.18	1.35	0.13	0.88	0.88	1.09	1.48	1.23	0.55	1.05	1.19
PA2G4	Q9UQ80	1_Phospho	T11: Phospho	SGEDEQQEQtIAEDLVVTK	0.19	-0.8	0.04	-0.38	-0.09	0.38	-0.04	0.29	0.25	-0.05	0.12	0.41
BRCA1	P38398-4	1_Phospho	S1480: Phospho	SsPSKCPSLDDR	-0.05	-0.25	0.02	-0.19	-0.2	0.2	-0.17	-0.33	0.09	-0.3	-0.29	0.17
REEP3	Q6NUK4	1_Phospho	S242: Phospho	YGsLK; YGsLKYK	0.37	0.47	-0.14	0.06	0.15	-0.23	0.41	0.49	0.03	0.24	0.25	-0.24
TRIO	O75962-5	2_Phospho	S2455: Phospho; S2459: Phospho	AGAAsPLNsPLSSAVPSLGK	-0.37	-0.53	-0.19	-0.83	0.11	-0.28	-0.43	-0.05	-0.54	-0.33	0.12	0.85
CCDC86	Q9H6F5	1_Phospho	S18: Phospho	RLGGLRPEsPESLTSVSR; LGGLRPEsPESLTSVSR; GLRPEsPESLTSVSR; LGGLRPEsPESLtSVSR	0.03	0.13	0.03	0.16	0.2	0.36	-0.03	-0.13	-0.08	0.03	0.18	0.35
ZMYND8	Q9ULU4	1_Phospho	S425: Phospho	RIsLSDMPR	0.18	0.22	-0.07	0.18	-0.32	0.62	0.36	-0.28	-0.22	0.24	-0.28	0.65
PRKD1	Q15139	1_Phospho	S910: Phospho	ALGERVsIL	-0.92	-0.31	0.38	-0.29	0.62	0.36	-1.01	-0.15	0.3	-0.67	0.41	0.81
RAI14	Q9P0K7-3	1_Phospho	S350: Phospho	VAsLTLHNK	-0.46	0.16	-0.95	0.17	-0.98	-0.21	-0.37	0.01	-0.02	0.34	-0.61	-1.01
SRRM2	Q9UQ35-2	1_Phospho	S1975: Phospho	TsPITR	-0.67	0.14	-0.18	-0.41	-0.42	0.27	-0.68	0.09	-1.17	-0.03	-0.41	1.1
CTNND1	O60716-21	1_Phospho	S151: Phospho	APsRQDVYGPQPQVR	0.41	0	0.6	0.29	0.84	0.04	-0.13	0.2	0.43	0.25	0.45	0.15
EIF4B	P23588	1_Phospho	S409: Phospho	HPSWRsEETQER; ERHPSWRsEETQER	0.12	-0.08	-0.12	-0.08	-0.44	0.31	0.44	0.05	0.32	0.21	-0.28	-0.42
KHDRBS1	Q07666-3	1_Phospho	S29: Phospho	SGSMDPSGAHPsVR	0.49	0.14	0.06	0.33	0.19	-0.12	-0.78	-0.13	-0.69	-0.03	-0.95	-0.14
STIP1	P31948	1_Phospho	S481: Phospho	HDsPEDVKRR; HDsPEDVKR; HDsPEDVK	0.02	0.11	-0.53	0.04	0.14	0.48	0.01	-0.59	0.37	-0.15	0.49	-0.91
ATXN2L	Q8WWM7	1_Phospho	S594: Phospho	GKEKEVDGLLTSEPMGsPVSSK; EKEVDGLLTSEPMGsPVSSK; EVDGLLTSEPMGsPVSSK	0.02	-0.11	0.23	-0.08	0.11	-0.12	0.11	0.15	0.04	-0.01	0.28	0.19
LYST	Q99698	1_Phospho	S2105: Phospho	SRsLPAFPTSSLLTQSQK; sLPAFPTSSLLTQSQK	0.47	1.25	0.12	0.84	-0.11	-0.03	0.72	0.43	0.76	0.99	0.33	-0.49
ENTHD2	Q96N21	1_Phospho	S356: Phospho	HFEASCGQLsPAR	0.09	0.03	-0.09	-0.14	0.48	0.25	0.33	0.74	0.75	1.05	0.29	-0.18
JMY	Q8N9B5	1_Phospho	S115: Phospho	SSAWAEGGsPR	0.44	0.28	0.36	-0.01	-0.34	-0.37	-0.46	-0.46	0.02	-1.04	-0.6	0.91
MTX3	Q5HYI7	1_Phospho	S284: Phospho	MDDNLRQsPQLPPR	0.05	-0.06	-0.49	-0.12	0.24	0.11	-0.02	-0.17	-0.16	-0.02	-0.11	-0.53
PKP4	Q99569	1_Phospho	S447: Phospho	TGsVGIGNLQR	-0.4	0.15	-0.65	0.25	-0.61	0.4	-0.34	0.11	0.43	0.16	-0.2	-0.37
SYNCRIP	O60506-5	No Phospho		LKDYAFIHFDER; GVEAGPDLLQ	-1.31	-0.54	-0.66	0.3	-0.84	-0.45	0.26	0.26	-0.19	0.2	-0.13	-1.31
LMO7	Q8WWI1-4	1_Phospho	S926: Phospho	GISsLPR	0.95	0.45	0.77	1.05	0.38	-0.42	0.85	0.39	0.52	0.61	0.24	-0.14
PAK4	O96013-2	2_Phospho	S97: Phospho; S99: Phospho	sNsLRRDSPPPPAR	0.76	0.6	-0.43	0.19	-1.81	0.54	0.6	-0.65	0.47	-0.24	-1.43	-1.44
FAM21A	Q641Q2-2	2_Phospho	S284: Phospho; S288: Phospho	sRPTsFADELAAR	0.29	0.54	0.02	0.73	0.28	0.38	-0.09	-1.65	-0.63	-0.07	0.42	0.42
ZDHHC5	Q9C0B5	1_Phospho	S694: Phospho	SLGSASPGPGQPPLSsPTR	0.17	0.2	0.25	0.37	0.47	-0.17	0.01	0.41	0.19	0.48	0.3	-0.01
TK1	P04183	1_Phospho	S231: Phospho	KLFAPQQILQCsPAN	-0.35	0.64	0.57	-0.2	0.19	-0.68	-0.05	0.04	0.12	-0.03	0.07	0.44
LIFR	P42702	1_Phospho	S887: Phospho	ALQFQKsVCEGSSALK	1.11	1.47	1.14	1.48	0.9	0.15	0.72	1.12	0.93	0.9	0.31	-0.28
BIN1	O00499	1_Phospho	S333: Phospho	VNHEPEPAGGATPGATLPKSPsQLR	-0.25	-0.35	-0.94	0.3	-0.18	0.26	0.45	0.4	0.81	0.2	0.38	-0.07
PPP3CC	P48454	1_Phospho	S463: Phospho	IRsFEEAR	-0.61	-0.8	-1.08	-0.62	0	0.17	-0.83	-1.13	-0.9	-1.56	-0.32	-0.31
IGF2R	P11717	1_Phospho		LVSFHDDSDEDLLHI	-0.09	-0.12	-0.16	0.05	0.36	-0.35	-0.13	-0.46	-0.42	-1.05	0.17	-0.59
MKI67	P46013-2	1_Phospho	S1319: Phospho	AFMEsPKQILDSAASLTGSK; AFMEsPK; AFMEsPKQILDSAASLTGSKR	0	-0.14	0.35	0.24	0.15	0.27	-0.04	-0.08	0.46	0.1	-0.11	0.63
HPS4	Q9NQG7-4	1_Phospho	S368: Phospho	GEVLGLSSsLGK	0.21	0.19	0.48	0.16	0.03	-0.16	0.31	0.68	0.43	0.43	0.06	0.03
SEPT9	Q9UHD8-7	1_Phospho	S66: Phospho	HVDSLSQRsPK	-0.04	0.53	-0.49	0.02	-0.04	-0.09	-0.35	-0.23	-0.17	-0.72	-0.3	-0.7
OSBPL11	Q9BXB4	2_Phospho	S181: Phospho	SFSLASSSNsPISQR	0.38	0.5	-0.05	0.32	0.78	-0.18	0.39	0.32	-0.19	0.4	0.48	-0.77
LMNA	P02545-3	1_Phospho		SGAQASSTPLSPTR; SVGGSGGGSFGDNLVTR; ASSHSSQTQGGGSVTKK; IDSLSAQLSQLQK; ASSHSSQTQGGGSVTK; LRLSPSPTSQR	0.48	0.46	0.67	0.03	1.06	0.26	0.49	0.56	0.14	-0.11	0.59	-0.54
RPL31	P62899	No Phospho		NLQTVNVDEN	0.15	0.5	0.21	0.37	0.14	-0.17	0.15	0.27	-0.03	-0.02	-0.65	0.24
CTAGE5	O15320-5	1_Phospho	S541: Phospho	AFLsPPTLLEGPLR	0.42	0.66	0.46	0.42	0.42	-0.44	0.1	0.11	-0.34	-0.11	0.35	-0.11
ETS1	P14921	1_Phospho	S251: Phospho	LGGQDsFESIESYDSCDR; GKLGGQDsFESIESYDSCDR	0.59	0.05	0.2	-0.07	0.32	-0.32	0.17	-0.24	-0.22	-0.08	0.02	0.26
PHLDB1	Q86UU1	1_Phospho	S678: Phospho	LWEsMER	0.38	0.65	0.67	0.19	0.24	-0.15	0.39	0.13	0.65	0.05	-0.02	0.12
DDX39A	O00148	1_Phospho	T171: Phospho	NCPHVVVGtPGR	-0.03	-0.24	-0.11	-0.14	-0.26	0.71	-1.39	-1.66	-1.97	-1.53	-1.03	0.72
CHMP2B	Q9UQN3-2	1_Phospho	S158: Phospho	ATIsDEEIER	0.2	0.06	-0.02	0.1	0.01	0.11	0.07	-0.04	-0.46	-0.51	-0.04	0.18
NUP205	Q92621	1_Phospho	S1939: Phospho	LQDsFASETNLDFR	-0.5	0.11	0.31	-0.06	-0.08	-0.05	-0.18	-0.3	-0.12	0.25	-0.67	-0.46
ADAM9	Q13443	2_Phospho	S758: Phospho; T761: Phospho	HVsPVtPPR; HVsPVtPPREVPIYANR	-0.59	0.03	0.17	0.38	0.2	0.57	-0.91	-0.87	-0.18	-0.1	-0.15	-0.23
SVIL	O95425-2	2_Phospho	S238: Phospho; S245: Phospho	DSsFTEVPRsPK	-0.66	-0.79	-1.26	-0.57	-0.61	-0.07	-0.65	-1.28	0.23	-0.44	-0.14	-1.38
RPS6KA3	P51812	1_Phospho	T736: Phospho	ItSTAL; KItSTAL	0.49	-0.04	0.22	-0.11	1.57	0.62	0.58	0.04	0.88	0.58	1.43	0.67
SSRP1	Q08945	1_Phospho	S657: Phospho	QLsESFK	0.18	0.11	-0.17	-0.36	-0.03	0.29	0.15	0.07	0.34	-0.18	-0.12	0.24
PTPN12	Q05209	2_Phospho	S603: Phospho; S606: Phospho	TPLSFTNPLHsDDsDSDER; TPLSFTNPLHsDDsDSDERNSDGAVTQNK	-0.11	-0.23	0	0.17	0.41	0.4	0.07	-0.19	0.06	-0.22	0.03	-0.21
LRWD1	Q9UFC0	1_Phospho	S243: Phospho	LAALKRPDDVPLSLsPSKR; RPDDVPLSLsPSK; RPDDVPLSLsPSKR	0.03	-0.25	0.09	-0.08	-0.02	0.17	0.06	0.08	0.17	-0.25	0.28	0.29
FAM64A	Q9BSJ6	1_Phospho	S11: Phospho	WQNMGTsVR	0.06	-0.42	-0.27	0.76	0.43	-0.21	-0.25	0.15	0.45	0.83	0.49	-0.2
TNKS1BP1	Q9C0C2	1_Phospho	S1533: Phospho	WsDQGPAQTSR	0.32	0.25	-0.58	-0.13	0.35	-0.04	0.09	0.16	-0.63	-0.75	0.26	0.17
MAST2	Q6P0Q8-2	1_Phospho	S830: Phospho	SWVIGsPEILR	-1.19	-0.14	-0.1	-0.14	-0.98	0.21	-1.2	0.19	-0.19	0.27	-1.14	0.35
SCARF2	Q96GP6-2	1_Phospho	S648: Phospho	GEIGGLSLSPsPERR; GEIGGLSLSPsPER	0.78	-0.1	0.27	0.59	0.33	0.2	0.17	-0.15	-0.64	0.19	0.33	0.55
RPL24	P83731	1_Phospho	T52: Phospho	QINWtVLYR	0.91	0.92	0.08	0.61	0.33	-0.49	0.49	-0.48	-1.13	-0.8	-0.96	0.03
CCDC86	Q9H6F5	1_Phospho	S91: Phospho	LQQGAGLESPQGQPEPGAAsPQR	-0.48	-0.45	-0.45	-0.67	-1.46	-0.47	-0.18	0.18	0.35	0.63	0.49	0.78
CLASP1	Q7Z460-3	1_Phospho	S646: Phospho	RQsSGSATNVASTPDNR; QsSGSATNVASTPDNR	0.04	0.15	-0.38	0.25	0.13	0.2	0.33	0.46	0.9	0.78	0.52	-0.28
TOP1	P11387	1_Phospho	S10: Phospho	SGDHLHNDsQIEADFR	-0.37	0.03	-0.08	-0.14	-0.01	0.49	-0.05	0.2	0.04	-0.05	0.12	0.12
RACGAP1	Q9H0H5	1_Phospho	T580: Phospho	VSLLGPVTtPEHQLLK	0.24	-0.46	0.59	-0.23	-0.05	0.62	0.13	0.18	0.12	-0.01	-0.53	0.25
PYCR2	Q96C36	1_Phospho	S304: Phospho	VKLESPTVSTLTPSsPGK; LESPTVSTLTPSsPGK	0	-0.31	0.2	-0.04	-0.22	0.49	0.17	-0.04	0.43	-0.21	-0.15	0.63
AKAP13	Q12802	2_Phospho	S1929: Phospho; S1932: Phospho	FLSHsTDsLNKISK; FLSHsTDsLNK	0.79	-0.18	0.36	0.08	0.2	-0.59	0.86	0.56	0.24	0.35	0.52	-0.06
RMI1	Q9H9A7	1_Phospho	S292: Phospho	QSSFEPEFVIsPRPK	0.18	-0.27	0.17	0.07	0.32	0.06	0.28	0.28	0.41	0.18	0.4	0.19
ZNF318	Q5VUA4	1_Phospho	T161: Phospho	ITVGNDHFCVStPERR	0.25	-0.16	-0.01	-0.54	0.26	0.13	-0.05	0.25	0.22	0.39	0.31	0.15
KIAA1217	Q5T5P2-6	1_Phospho	S727: Phospho	LGGKsPPPPPPPPR	0.08	-0.08	0.1	0.06	0.61	0.43	-0.46	0.08	-0.16	0.14	0.24	0.17
S1PR3	Q99500	1_Phospho	S326: Phospho	AsPIQPALDPSR	0.7	0.71	0.19	0.71	0.5	0.41	-0.1	-0.35	0.24	0.59	0.27	-0.43
CASC5	Q8NG31	1_Phospho	S1773: Phospho	EIsPYENK	-0.33	-0.31	-0.31	-0.37	-0.11	0.11	-0.1	0.05	-0.39	-0.05	-0.03	0.24
SRRM2	Q9UQ35-2	1_Phospho	S455: Phospho	EISsSPTSK	0.05	-0.15	0.33	0.04	0.17	-0.11	0.17	0.25	0.13	0.3	0.28	0.35
SLC22A17	Q8WUG5	1_Phospho	S515: Phospho	RPsLLRQPPPTR	0.31	1.13	0.55	1.17	-0.1	0.21	0.16	0.08	0.11	0.01	0.02	-0.29
MLLT4	P55196-1	1_Phospho	T1215: Phospho	EYFtFPASK	0.11	0.04	0.75	0.36	0.53	-0.33	0.27	0.15	0.5	0.34	0.66	-0.08
RAD18	Q9NS91	1_Phospho	S471: Phospho	NDLQDTEIsPR; DLLEEEEAWEASHKNDLQDTEIsPR	0.03	-0.31	-0.51	-0.06	-0.12	0.56	-0.14	-0.4	-0.28	0.08	-0.07	0.13
PPP1R13L	Q8WUF5	1_Phospho	S113: Phospho	SESAPTLHPYSPLsPK	0.04	-0.25	0.21	-0.23	0.8	0.5	-0.19	-0.09	0.37	-0.4	0.59	0.62
RANBP3	Q9H6Z4	1_Phospho	S333: Phospho	VLsPPKLNEVSSDANR; VLsPPK	-0.06	0.1	0.35	-0.14	0.04	-0.01	-0.17	0.21	0.02	0	-0.08	0.52
G3BP1	Q13283	1_Phospho	S231: Phospho	ssSPAPADIAQTVQEDLR; SsSPAPADIAQTVQEDLR; SssPAPADIAQTVQEDLR	0.32	-0.41	-0.35	0.32	-0.11	0.76	0.05	-0.25	0.32	0.58	0.52	-0.58
DYNC1LI1	Q9Y6G9	1_Phospho	S207: Phospho	LIRDFQEYVEPGEDFPAsPQRR; LIRDFQEYVEPGEDFPAsPQR; DFQEYVEPGEDFPAsPQRR; DFQEYVEPGEDFPAsPQR; DFQEyVEPGEDFPAsPQR	-0.16	-0.33	-0.41	-0.21	0.2	0.08	-0.06	-0.28	0.12	-0.14	0.07	-0.09
TMPO	P42167-2	1_Phospho	T160: Phospho	SStPLPTISSSAENTR; SStPLPTISSSAEN	0.73	0.3	-0.59	0.54	0.29	-0.31	0.55	0.14	0.15	0.29	0.13	-0.74
LPP	Q93052	1_Phospho	S609: Phospho	VLTAKAsTDL	-1.04	-0.42	-0.04	-1.19	0.5	0.83	-1.75	-0.63	-0.05	-1.55	0.69	1.37
TTC33	Q6PID6	1_Phospho	S197: Phospho	SEAPAEVTHFsPK	0.18	0.02	0.85	0.35	-0.37	-0.08	-0.1	-0.17	0.5	0.42	-0.53	0.04
NEK9	Q8TD19	1_Phospho		SSTVTEAPIAVVTSR	0.07	-0.24	-0.3	-0.22	0.24	0	-0.32	-0.17	0.05	-0.46	-0.23	-0.42
ANKIB1	Q9P2G1	1_Phospho	S737: Phospho	GVAPADsPEAPRR; GVAPADsPEAPR	-0.23	0.35	0.17	-0.05	-0.01	0.02	-0.16	0.01	-0.08	0.15	-0.19	0.21
LCA5	Q86VQ0	1_Phospho	S686: Phospho	AADsVEDEIEEVALR	0.28	0.26	-0.55	0.43	0.13	0.63	-0.66	-0.46	-0.44	-0.54	0	0.28
TAGLN	Q01995	1_Phospho	S181: Phospho	HVIGLQMGsNR	-0.02	-0.08	-0.07	0.21	0.01	0.13	-0.66	-0.22	0.17	-0.15	-0.15	0.1
RAD50	Q92878-2	1_Phospho	S641: Phospho	KEEQLSSYEDKLFDVCGsQDFESDLDR; LFDVCGsQDFESDLDR	-0.02	0.1	-0.99	0.35	0.36	-0.03	0.21	0.44	0.28	0.81	0.41	-0.27
LATS2	Q9NRM7	1_Phospho	S576: Phospho	QIQTsPVPVR; QIQTsPVPVRK	0.17	0.39	-0.16	0.25	0	0.11	-0.13	-0.16	-0.58	-0.1	-0.23	0.25
ACIN1	Q9UKV3-5	1_Phospho	S729: Phospho	LQPERGsPK	-0.02	0.05	0.21	0.12	-0.12	-0.15	-0.42	-0.53	-0.55	-0.4	-0.48	0.16
CDC23	Q9UJX2-3	2_Phospho	S470: Phospho; S475: Phospho	RVsPLNLsSVTP	-0.19	-1.1	-0.15	-0.78	-0.04	0.36	0.11	0.23	0.21	0.39	0.35	0.2
DOCK10	Q96BY6	1_Phospho	T196: Phospho	GNFNStVNNTVTVR	0.2	-0.55	-0.33	-0.39	0.34	0.54	0.11	-0.24	-0.43	-0.07	0.43	0.43
EPB41L2	O43491	1_Phospho	S647: Phospho	HQAsISELK; HQAsISELKR	0.77	0.36	0.04	0.82	0.63	-0.08	0.51	0.68	0.56	0.73	0.83	-0.24
TMEM184B	Q9Y519	2_Phospho	S402: Phospho; S403: Phospho	TLLLssDDEF	-0.17	0.47	0.69	0.02	-0.29	0.35	-0.5	0.1	-0.18	-0.63	-0.99	0.01
MAP4	P27816	1_Phospho	S358: Phospho	AsPIKMDLAPSK; NVVLPTETEVAPAKDVTLLKETERAsPIK; ETERAsPIKMDLAPSK; ETERAsPIK	-0.07	0.1	0.17	-0.14	-0.14	-0.04	0.1	0.36	0.18	0.17	0.04	0.81
MCM9	Q9NXL9	1_Phospho	S1073: Phospho	SKsPPPER	-0.56	-0.5	0	-0.59	-1.26	-0.25	-0.33	-0.14	-0.76	-0.15	-0.61	0.34
RPS6	P62753	2_Phospho	S235: Phospho; S236: Phospho	RLssLRASTSK; RLssLR	-0.04	0.08	0.13	0.05	0.02	-0.21	0.05	-0.33	0.29	0.06	0.1	-0.75
KIAA1462	Q9P266	1_Phospho	S1319: Phospho	LGHSLsVSK; LGHSLsVSKDSISR	0.56	-0.16	-0.19	0.63	0.45	-0.34	0.29	0.68	0.5	0.66	0.15	-0.28
PPP1R18	Q6NYC8	1_Phospho	S530: Phospho	SCLAKGsPER	0.05	-0.26	0.19	-0.34	-0.14	0.04	0.2	-0.13	0.4	-0.19	0.11	0.07
ANKHD1	Q8IWZ3	1_Phospho	S1670: Phospho	TVSLPLSsPNIK	0.16	-0.3	0.48	0.04	0.01	0.65	-0.4	-0.03	0.23	-0.44	0	1.79
IRS1	P35568	1_Phospho	S1101: Phospho	HSsETFSSTPSATR	0.23	-0.13	0	0.2	0.1	-0.09	0.37	-0.04	0.38	0.02	0.39	-0.46
TICRR	Q7Z2Z1-2	2_Phospho	S1429: Phospho; S1432: Phospho	GLSLsPQsPPERR	-0.14	-0.13	0.17	0.19	-0.11	0.35	-1.53	-1.37	-1.27	-1.46	-1.27	0.06
SOGA2	Q9Y4B5	1_Phospho	S1791: Phospho	sAEPRPELGPGQETGTNSR	-0.53	-0.35	-0.52	-0.17	-0.79	-0.34	-0.56	-0.2	0.31	0.31	-0.78	-0.22
KIAA1549L	Q6ZVL6	1_Phospho	S1310: Phospho	sPQNVMAQQK	-0.22	0.15	0.49	0.21	0.14	-0.05	-0.13	0.12	-0.27	-0.21	-0.09	0.41
TBC1D10B	Q4KMP7	2_Phospho	T148: Phospho	TEEARPSPAPGPGtPTGTPTR	-0.02	0.13	0.4	0.42	0.25	0.35	0.36	-0.06	0.68	-0.02	0.56	1.42
MTMR3	Q13615	1_Phospho	S613: Phospho	sYDNLTTACDNTVPLASR; TRsYDNLTTACDNTVPLASR	-1.58	0.37	-0.19	-0.03	-0.2	0.86	-0.12	-0.02	-0.01	0.04	-0.45	-0.34
GPSM1	Q86YR5	1_Phospho	S493: Phospho	APSsDEECFFDLLTK	0.42	0.95	0.49	0.38	0.16	0.05	0.47	0.87	0.75	0.76	0.63	0.48
THOC2	Q8NI27	1_Phospho	S1393: Phospho	GGEKTPVSGSLKsPVPR; TPVSGSLKsPVPR	0.15	-0.13	0.37	-0.09	-0.23	-0.14	0.27	-0.1	0.33	-0.19	-0.19	0.46
LYST	Q99698	1_Phospho	S2264: Phospho	WPsLVDR	0.89	1.41	0.82	-0.21	0.31	0.87	0.86	0.62	-0.14	-0.65	-0.84	0.67
MARK3	P27448-8	1_Phospho	S484: Phospho	sTFHGQPR	0.61	-0.1	0.77	-0.92	-0.52	0.26	-0.42	0.53	0.04	0.43	0.16	0.55
AHNAK	Q09666	1_Phospho	T5824: Phospho	tFGGLGSK; LKFGtFGGLGSK; FGtFGGLGSK	0.36	-0.26	-0.39	0.55	0.2	-0.13	0.01	-0.01	0.57	0.34	-0.03	-0.59
PRKAR1A	P10644	1_Phospho	S83: Phospho	EDEIsPPPPNPVVK; TDSREDEIsPPPPNPVVK	0.44	0.51	-0.15	0.5	0.44	-0.58	0.6	0.56	0.39	0.5	0.41	-0.69
SMTN	P53814-5	1_Phospho	S341: Phospho	FTSDsPMAAR	0.29	0.05	0.08	0.19	0.49	0.88	0.31	0.04	-0.05	-0.46	0.66	0.71
PHLDB2	Q86SQ0-2	1_Phospho	S73: Phospho	SPsPLGTSVR	-0.74	-0.12	-0.13	0.22	-0.59	0.77	-0.33	0.01	-0.01	0.46	-0.86	1.02
DIP2B	Q9P265	1_Phospho	S100: Phospho	sDIHTEAVQAALAK; YRsDIHTEAVQAALAK	-0.11	-0.76	-0.13	0.01	0.53	0.11	-0.14	-0.1	0.11	0.02	0.37	-0.29
BCL9L	Q86UU0	2_Phospho	S991: Phospho	SPQVLGSSLSVRSPTGsPSR	-0.17	0.38	0.1	-0.02	0.5	-0.07	0.4	0.75	0.42	0.28	0.39	-0.12
PRRC2A	P48634	1_Phospho	S1004: Phospho	ETPPNGNLsPAPR	0.39	0.29	0.23	-0.16	0.85	0.58	0.15	0.05	-0.01	-0.17	0.88	1.24
NAV1	Q8NEY1-3	1_Phospho	S296: Phospho	GSQVTHSSLEMTCYDsDDANPR	0.49	0.12	-0.01	-0.05	0.4	0.65	-0.38	-0.72	-0.68	-0.75	-0.2	0.22
GAPDH	P04406	No Phospho		WGDAGAEYVVESTGVFTTMEK; GILGYTEHQVVSSDFNSDTHSSTFDAGAGIALNDHFVK; LEKPAK; AGAHLQGGAKR; LISWYDNEFGYSNR; VPTANVSVVDLTCR; IKWGDAGAEYVVESTGVFTTMEK; LEKPAKYDDIK; GALQNIIPASTGAAK; YDDIKK; VVDLMAHMASKE; FHGTVK; IISNASCTTNCLAPLAK	0.4	0.45	0.37	0.23	0.44	-0.16	0.34	0.66	0.66	0.48	0.35	-0.22
MEPCE	Q7L2J0	1_Phospho	S69: Phospho	EsPGAAATSSSGPQAQQHR; CAPSAGSPAAAVGREsPGAAATSSSGPQAQQHR	-0.6	0.35	-0.02	-0.13	0.19	-0.49	0.31	0.31	0.63	0.56	0.7	0.12
MSH6	P52701-2	1_Phospho	S14: Phospho	sPALSDANK; QSTLYSFFPKsPALSDANK	-0.29	0.01	0.31	-0.44	-0.24	-0.1	-0.1	0.21	0.25	0.11	-0.16	0.04
PAK4	O96013	1_Phospho	T207: Phospho	LAAGRPFNtYPR	0.75	0.22	0	0.1	-0.75	-0.49	0.54	0.32	0.1	-0.06	-1.39	-0.29
PKP4	Q99569	1_Phospho	S314: Phospho	VGsPLTLTDAQTR; VGsPLtLTDAQTR; VGsPLTLtDAQTR	-0.88	0.15	-0.59	0.02	-0.64	0.55	-0.92	0.35	-0.05	0.04	-0.54	-0.17
FKBP3	Q00688	No Phospho		LTFEVELVDID	-0.33	0.08	-0.32	0.11	-0.6	-0.37	-0.37	0.77	0.09	0.23	0.63	0.6
LIMCH1	Q9UPQ0-4	2_Phospho	T215: Phospho; S217: Phospho	QtPsPDVVLR; SRQtPsPDVVLR	-0.53	-0.82	0.21	0.28	-1.11	-0.01	-1.18	-0.54	0.31	0.05	-1	-0.13
SMARCC1	Q92922	2_Phospho	S328: Phospho; S330: Phospho	HsPsPPPPTPTESR; RKHsPsPPPPTPTESR; KHsPsPPPPTPTESR	-0.27	-0.72	-0.61	0.24	-0.25	0.41	0.47	0.37	0.74	0.98	0.33	-0.47
SRRM2	Q9UQ35-2	1_Phospho	S1404: Phospho	AGMSSNQSISsPVLDAVPR	-0.38	0.09	-0.15	-0.09	-0.37	0.1	0.06	0.15	-0.02	0.21	-0.04	0.11
PRKAA1	Q13131-2	2_Phospho	T505: Phospho	SIDDEITEAKSGTAtPQR	-0.21	0.68	-0.33	0.72	0.03	-0.06	-0.02	-0.46	-0.17	-0.43	0.34	-0.09
AKAP12	Q02952	1_Phospho	T1484: Phospho	StPVIVSATTK	-0.04	-0.04	0.08	-0.1	0.11	0.36	-0.85	0.08	-0.5	0.16	-0.08	0.64
TCOF1	Q13428	1_Phospho	S906: Phospho	AALAPAKEsPR	-0.26	-0.02	0.09	-0.02	-0.19	0.22	-0.22	0.12	-0.04	-0.03	-0.01	0.37
SMARCC2	Q8TAQ2	1_Phospho	S283: Phospho	TLTDEVNsPDSDRR	-0.16	0.2	-0.07	-0.02	-0.28	0	0.16	-0.08	-0.26	-0.06	-0.03	0.16
UBR4	Q5T4S7-3	1_Phospho	S2730: Phospho	HVTLPSsPR	0.09	-0.08	-0.22	0.04	0.2	0.23	0.03	0.14	0.32	0.04	0.23	-0.21
DCP1A	Q9NPI6	1_Phospho	T531: Phospho	ASSPSPLTIGtPESQR	-0.37	-0.1	0.74	-0.27	0.26	-0.14	-0.1	0.04	-0.43	0.11	-0.32	0.04
STT3B	Q8TCJ2	1_Phospho	S499: Phospho	ENPPVEDSsDEDDKR	0.72	1.54	1.85	1.47	0.66	0.17	0.07	-0.53	-0.19	-0.13	-0.27	0.24
CTNND1	O60716-2	1_Phospho		VSPQDANPLMANGTLTRR; VSPQDANPLMANGTLTR; MDDSEVESTASILASVK; LNGPQDHSHLLYSTIPR	0.32	0.06	0.42	0.22	0.27	-0.12	0.19	-1.35	-1.02	-0.98	-0.61	0.11
LIMCH1	Q9UPQ0-4	1_Phospho		SWSTATSPLGGERPFR; CSPTVAFVEFPSSPQLK	-1.01	-0.24	0.42	-0.24	-0.25	0.47	-1.52	0.15	0.64	0.33	-1.58	0.41
NUFIP2	Q7Z417	1_Phospho	S652: Phospho	NDsWGSFDLR	-0.03	-0.21	-0.92	-0.1	0.18	0.42	-0.13	-0.11	-0.2	-0.36	0.14	-1.26
ARHGEF17	Q96PE2	1_Phospho	S914: Phospho	LADILsPR	0.69	-0.14	-0.8	-0.02	1.14	1.02	0.83	0.6	0.67	0.28	1.21	0.24
SIPA1	Q96FS4	1_Phospho	S55: Phospho	SGsDAGEARPPTPASPR	0.27	0.33	-0.38	0.36	0.2	-0.08	0.2	0.25	-0.02	0.26	0.2	-0.61
ITPR3	Q14573	1_Phospho	S1832: Phospho	VAsFSIPGSSSR	2.1	1.3	-0.74	1.97	0.68	-2.14	-0.08	-0.11	-0.32	0.52	-0.06	-0.26
CCDC61	Q9Y6R9	2_Phospho	S335: Phospho; S338: Phospho	LGsGGsGDGPSVSWSR	0.04	-0.36	-0.28	-0.16	-0.16	-0.22	0.35	-0.95	0.58	0.99	0.6	-0.47
SVIL	O95425	1_Phospho	S644: Phospho	RYFsPGESR; YFsPGESR	-0.32	-0.14	-0.52	-0.75	-1.01	-0.69	-0.26	-0.16	-0.7	-0.6	-1.44	0.12
NKTR	P30414	1_Phospho	S379: Phospho	AYRPPsGEK	-0.18	-0.06	-0.06	-0.16	-0.27	-0.27	-0.05	0.31	0.07	-0.02	-0.28	0.35
KRT8	P05787	1_Phospho	S291: Phospho	YEELQsLAGK	0.12	0.23	0.33	0.2	-0.23	0.13	0.62	0.43	-0.06	0.35	0.17	0.41
KIF26B	Q2KJY2-2	1_Phospho	S1403: Phospho	HTPWSTQsLSR	0.93	0.84	0.84	0.83	0.32	-0.19	0.63	0.7	0.71	0.58	-0.09	-0.33
ZCCHC7	Q8N3Z6	1_Phospho	S482: Phospho	TYSsPGSFK	-0.45	-0.28	-0.2	-0.08	-0.31	0.37	-0.21	-0.23	-0.24	-0.41	-0.08	0.34
RAB11FIP1	Q6WKZ4	1_Phospho	S280: Phospho	TAsTDLK	-0.95	-0.83	-0.35	-0.26	-0.57	-0.55	-1.04	-0.73	0	0	-0.16	-0.15
PACS2	Q86VP3-3	1_Phospho	S417: Phospho	TEsLVIPSTR	-0.32	0.2	-0.4	0.23	-0.27	-0.91	-0.15	0.34	-0.12	0.5	-0.51	-0.54
POGZ	Q7Z3K3-5	2_Phospho	S1272: Phospho; T1273: Phospho	LSGEHSESstPRPR	0.22	0.27	0.18	-3.35	0.29	-0.21	0.51	0.32	0.36	0.7	0.18	-0.32
AKAP13	Q12802	1_Phospho	S1602: Phospho	SFsLEGLTGGAGVGNKPSSSLEVSSANAEELR; SFsLEGLTGGAGVGNKPSSSLEVSSANAEELRHPFSGEER; SFsLEGLTGGAGVGN	0.12	0.84	-0.23	-0.4	-0.23	-0.07	0.35	0.24	-0.21	0.21	0.05	-0.47
SLTM	Q9NWH9	2_Phospho	S551: Phospho; S553: Phospho	ISsKsPGHMVILDQTK	0.08	-0.08	-0.53	0.17	-0.01	0.44	0.31	0	0	-0.16	0.26	-0.35
SSFA2	P28290	1_Phospho	S767: Phospho	CsPPSFTYK	0.41	0.36	-0.06	0.4	0.3	0.18	0.38	-0.29	-0.22	-0.31	0.4	-0.07
ALDOA	P04075	1_Phospho	S39: Phospho	GILAADESTGsIAKR; GILAADESTGsIAK	0.87	1.09	0.81	0.95	0.09	-1.06	0.76	0.94	0.81	0.73	0.4	-0.41
SCRIB	Q14160-2	1_Phospho	T394: Phospho	RAtPHPSELK	0.38	-0.29	0.14	-0.03	-0.1	0.09	0.45	-0.01	0.53	0.24	0.14	-0.18
IRS2	Q9Y4H2	1_Phospho	S805: Phospho	GVPGCCYSsLPR	0.98	0.41	0.26	0.55	0.6	-0.1	0.67	0.36	0	0.18	0.19	0.4
LUC7L2	Q9Y383	1_Phospho	S18: Phospho	AMLDQLMGTsR	0.16	0.1	0.17	0.28	-0.24	0.08	0.42	0.16	0.31	0.44	-0.04	-0.3
SNX17	Q15036	1_Phospho	S421: Phospho	SPPLLEsPDATR	-0.2	0.12	0.35	0.09	0.33	0.06	0.15	0.98	0.92	0.53	0.64	0.33
AEBP2	Q6ZN18	1_Phospho	S206: Phospho	RGsLEMSSDGEPLSR	-0.05	0.46	0.05	0.52	-0.11	0.1	0.13	0.25	0.31	0.78	0.32	-0.01
AHNAK	Q09666	1_Phospho	S5830: Phospho	TFGGLGsK; LKFGTFGGLGsK; FGTFGGLGsK; FGtFGGLGsK; GTFGGLGsK	0.25	0.17	0.09	0.48	0.01	-0.62	-0.21	-0.14	-0.06	0.06	-0.5	-0.32
CDKL5	O76039-2	1_Phospho	S306: Phospho	LLDRsPSR	-0.49	-0.22	-0.51	-0.68	-0.05	0.14	-0.65	-0.82	0.04	-0.14	-0.16	-0.15
DSP	P15924	1_Phospho	S2849: Phospho	RGsFDATGNSSY	-0.77	-0.39	-0.27	-0.47	-0.39	0.01	-0.28	-0.52	-0.76	-1	-1.31	0.92
CXorf23	A2AJT9-3	2_Phospho	S15: Phospho; S17: Phospho	sLsPVPR; HRsLsPVPR	-0.42	0.42	-0.14	-0.1	0.02	0.11	-0.31	-0.77	0.02	-0.2	-0.2	-0.38
RANBP3	Q9H6Z4	1_Phospho	S126: Phospho	TSsLTQFPPSQSEER	0.09	-0.06	-0.7	0.13	0.28	0.32	0.04	0.33	0.24	0.16	0.19	-0.4
SRRM2	Q9UQ35-3	1_Phospho	S262: Phospho	SsTGPEPPAPTPLLAER	-0.63	0.61	-0.42	0.38	-0.23	0.35	-0.68	-1.02	-1.43	-0.49	-0.61	0.22
SRSF6	Q13247	2_Phospho	S314: Phospho; S316: Phospho	sVsPPPK; ARsVsPPPK; sVsPPPKR; ARsVsPPPKR	0.05	0.1	0.12	-0.05	-0.14	0.18	0.04	-0.38	0.02	-0.06	-0.1	-0.1
MARK2	Q7KZI7-8	1_Phospho		VPVASPSAHNISSSGGAPDR; SRNSPLLER; SVSANPK; STFHAGQLR	0.22	0.32	0.56	0.19	0.04	0	0.11	-0.07	-0.04	-0.03	-0.65	0
CENPF	P49454	1_Phospho	S3194: Phospho	LVPsPK	0.09	-0.07	0.05	-0.1	-0.73	-0.27	0.15	0.34	0.2	-0.07	-0.15	0.53
ARHGAP29	Q52LW3	1_Phospho	S559: Phospho	SLDSESIsPGDFHR	0.55	0.36	-0.13	0.15	0.42	0.03	0.41	-0.21	0.3	-0.1	0.33	-0.14
THSD1	Q9NS62	1_Phospho	T623: Phospho	LDLNVTQASCAISPSQtLIRK; LDLNVTQASCAISPSQtLIR	1.24	0.62	1.27	1.45	1.36	-0.86	0.53	0.13	0.56	0.52	0.5	-0.16
SLC4A1AP	Q9BWU0	1_Phospho	S312: Phospho	MLGEDsDEEEEMDTSER; KMLGEDsDEEEEMDTSER	-0.15	-0.08	0.07	-0.41	-0.06	0.65	0	-0.17	0.08	-0.01	0.11	0.1
MKI67	P46013	1_Phospho	S357: Phospho	TPVQYSQQQNsPQKHK; MKTPVQYSQQQNsPQKHK; MKTPVQYSQQQNsPQK; TPVQYSQQQNsPQK	-0.1	-0.14	0.29	0.42	-0.19	0.54	0	-0.08	0.26	0.28	0.11	0.32
SCRIB	Q14160-2	1_Phospho	S1394: Phospho	VQsPEPPAPER; LRVQsPEPPAPER	-0.03	0.04	0.1	0.51	0.14	0.34	-0.05	-0.3	-0.53	0.3	-0.06	0.13
CLASP1	Q7Z460	1_Phospho	S797: Phospho	VLSTsTDLEAAVADALKKPVR; VLSTsTDLEAAVADALK; VLSTsTDLEAAVADALKKPVRR; VLSTstDLEAAVADALK	-0.35	-0.4	0.04	-0.02	0.02	-0.83	-0.12	0.34	0.09	-0.17	-0.09	-0.09
NFIC	P08651-3	1_Phospho	S314: Phospho	NWTEDMEGGISsPVKK; NWTEDMEGGISsPVK	0.13	0.37	0.58	-0.14	0.15	0.16	0.01	0.42	0.05	0.3	0.06	0.55
EHBP1	Q8NDI1	1_Phospho	S1058: Phospho	KPsEDEVLNK	-0.28	-0.72	0.03	-0.01	-0.47	-0.59	0.05	-0.48	0.02	0.14	-0.45	0.18
MKI67	P46013-2	1_Phospho	S1984: Phospho	IACKsPQPDPVDTPASTK	0.13	-0.78	-0.1	-0.19	-0.16	0.77	0.16	0	0.68	0.36	0.27	0.31
DOCK5	Q9H7D0	1_Phospho	S1834: Phospho	NsTELAPPLPVRR; NsTELAPPLPVR; SKPYEGSQRNsTELAPPLPVR	0.56	0.54	0.19	-0.07	0.58	-0.26	0.45	0.62	0	0.58	0.44	0.86
SH2D3A	Q9BRG2	1_Phospho	T211: Phospho	APtKPPR	0.09	0.08	-0.11	0.08	0.02	0.23	0.01	-0.76	-0.05	0.11	-0.06	0.45
ZMYM4	Q5VZL5	1_Phospho	S122: Phospho	VTQHEsDNENEIQIQNK	-0.36	-0.69	-0.96	-0.27	0.1	0.34	0.22	-0.1	-0.03	0.13	0.09	-0.17
LRRFIP2	Q9Y608-4	1_Phospho	S77: Phospho	SDKQYAENYTRPSsR; QYAENYTRPSsR	0.14	0.24	0.25	0	0.08	-0.04	0.06	0.01	-0.08	-0.15	0.2	0.1
SH3KBP1	Q96B97-3	1_Phospho	S349: Phospho	ANsPSLFGTEGKPK	0.65	0.44	0.14	0.15	0.75	-0.07	0.54	0.62	0.17	-0.14	0.77	-0.37
SORBS2	O94875-5	1_Phospho	S306: Phospho	LGEVTGSPsPPPR	0.17	0.33	0.21	-0.05	0.49	0.06	0.29	-0.07	0.14	0.57	0.52	0.16
PCYT1A	P49585	1_Phospho	S315: Phospho	MLQAIsPK	0.23	0.51	0.18	-0.35	0.16	-0.39	0.34	0.61	0.12	-0.27	0.18	0.25
MAST2	Q6P0Q8-2	1_Phospho	S861: Phospho	RCsGLLDAPR	-0.08	0.25	-0.18	0.26	-0.52	0.08	-0.7	-0.15	-0.65	0.23	-1.35	-0.34
SNTB1	Q13884	1_Phospho	S389: Phospho	GsPQAGVDLSFATR; LVHSGPGKGsPQAGVDLSFATR	-0.64	-0.11	0.34	-0.1	-0.56	-0.32	0.11	-0.07	-0.62	0.11	-0.38	-1.3
MICALL1	Q8N3F8	1_Phospho	S578: Phospho	VEQMPQAsPGLAPR	-0.05	-0.06	0.05	-0.31	-0.07	0.23	-0.35	-0.33	-0.4	-0.56	-0.19	-0.08
HN1	Q9UK76	1_Phospho	S80: Phospho	SSGGREDLESsGLQR	0.01	0.04	0.1	0.15	1.05	0.51	-0.28	-0.01	0	-0.48	0.95	0.08
SNTB2	Q13425-2	2_Phospho	S95: Phospho; S110: Phospho	GLGPPsPPAPPRGPAGEAGAsPPVRR; GLGPPsPPAPPRGPAGEAGAsPPVR	0.58	-0.13	0.18	0.86	0.47	0.09	0.75	0.1	0.75	0.5	0.67	-0.64
GAS2L1	Q99501-2	1_Phospho	S306: Phospho	VSPTTSPRPAsPVPGSER	0.55	-0.14	0.62	0.52	0.37	0.02	0.46	-0.21	0.44	-0.21	0.1	-0.21
SRRM2	Q9UQ35-2	1_Phospho	S1424: Phospho	SSSASsPEMK	-0.45	-0.62	0.21	-0.96	-0.62	1.23	-0.52	-0.24	0.05	-0.03	-0.79	0.01
PGM2L1	Q6PCE3	1_Phospho	S175: Phospho	LKAVAGVMITAsHNR; AVAGVMITAsHNR	-0.18	0.02	0.26	0.04	0.16	0.17	-0.34	0.06	0.34	0.02	0.23	0.1
RSL1D1	O76021	1_Phospho	T464: Phospho	FFtTPSK	-0.11	-0.37	-0.14	-0.19	-0.48	1.11	-0.28	-0.73	-0.09	-0.13	-0.21	0.65
HNRNPA1	P09651	1_Phospho	S338: Phospho	SsGPYGGGGQYFAKPR	0.48	0.01	0.38	-0.27	0.31	0.2	0.35	-0.04	0.15	-0.12	0.17	0.73
KCTD3	Q9Y597-3	1_Phospho	S18: Phospho	TEsFHSYR; TEsFHSYRDFQTINLNR	-0.03	-0.03	-0.57	-0.46	0.03	-0.3	0.13	0.47	-0.32	0.12	0.26	-0.56
ZKSCAN1	P17029	1_Phospho	S208: Phospho	ALPAAHIPAPPHEGsPR	-0.06	0.08	-0.19	-0.22	-0.66	-0.78	-0.1	0.09	0.09	0.04	-0.18	0.3
CDK9	P50750-2	1_Phospho	T303: Phospho	NSQPNRYtNR	0	0	-0.23	0.01	-0.09	-0.37	-0.03	-0.85	0.36	0.71	0.8	0.56
SH3BP1	Q9Y3L3	1_Phospho	S586: Phospho	SsPPAPPLPPGSGSPGTPQALPR	-0.25	-0.45	0.42	-0.05	-1.27	-1.13	-0.15	-0.4	-0.17	-0.11	-0.53	-0.04
MAP1B	P46821	1_Phospho	S2098: Phospho	TELsPSFIN; TELsPSFINPNPLEWFASEEPTEESEKPLTQSGGAPPPPGGK; TELsPSFINPN	-1.68	-0.71	0.04	-0.58	0.09	-0.21	-1.51	-0.31	-0.05	-0.64	0.01	-0.08
LMNB1	P20700	2_Phospho	T20: Phospho; S23: Phospho	AGGPTtPLsPTR	-0.35	-0.36	0	-0.32	-0.31	0.19	-0.05	-0.78	-0.05	-0.57	-0.05	0.22
KIAA1462	Q9P266	1_Phospho	S1044: Phospho	GLsAPDLR	0.1	0.4	0.53	0.82	-0.46	-0.43	0.29	0.54	0.66	0.96	-0.21	-0.23
NUMA1	Q14980	1_Phospho	T2000: Phospho	VSLEPHQGPGtPESK; VSLEPHQGPGtPESKK	0.62	-0.83	0.43	0.41	-0.2	0.79	0.3	-0.05	0.32	0.05	-0.07	0.07
IRS2	Q9Y4H2	1_Phospho	S391: Phospho	PVSVAGSPLsPGPVR; TASEGDGGAAAGAAAAGARPVSVAGSPLsPGPVR	0.27	0.36	-0.36	-0.62	0.04	0.17	-0.24	-0.51	-0.36	-0.54	-0.18	0.5
ZNF639	Q9UID6	1_Phospho	S88: Phospho	NQNYLVPsPVLR	-0.1	-0.01	-0.35	-2.11	-0.16	0.19	-0.03	0.09	-0.05	0.25	-0.41	-0.35
LIMD1	Q9UGP4	1_Phospho	S277: Phospho	VSPGLPsPNLENGAPAVGPVQPR	1.3	2.37	2.17	2.46	1.97	-0.06	-0.22	-0.18	-0.21	-0.08	-0.03	-0.1
PANK4	Q9NVE7	1_Phospho	S404: Phospho	sGTFDLLEMDR	0.21	0.06	-0.48	-0.12	0.34	-0.15	0.07	-0.4	-0.6	-0.48	-0.15	0.03
RABEP2	Q9H5N1-2	1_Phospho	S193: Phospho	HAPSLHGsTELLPLSR	0.44	0.04	-0.25	0.16	0.76	0.19	0.18	-0.25	0.02	-0.12	-0.16	-0.17
CCDC86	Q9H6F5	2_Phospho	S18: Phospho; S21: Phospho	LGGLRPEsPEsLTSVSR	-0.3	0.42	0.07	0.44	-0.53	0.37	0.08	-0.22	0.15	0.09	-0.24	0.09
WDR62	O43379-4	1_Phospho	S1410: Phospho	WSEPWVPVEALPPsPLELSR	-0.42	-0.25	0.44	-1.33	0.7	-0.68	-0.15	0.23	-0.17	-0.19	0.25	-0.01
LEMD3	Q9Y2U8	1_Phospho	S141: Phospho	VLLGFSsDESDVEASPR	-0.58	-0.58	-0.32	-0.22	-0.09	0.78	0.88	0.78	1.18	1.28	0.82	-0.13
MIER1	Q8N108	1_Phospho	S369: Phospho	LLDESEsAASSR	0.14	0.16	-0.4	-0.07	0.06	-0.48	-0.31	-0.32	-0.77	-0.32	-0.24	-0.56
TRIP12	Q14669-4	1_Phospho	S1106: Phospho	QFSIQAEDEREsTDDESNPLGR	-0.2	-0.31	-0.54	-0.09	0.35	0.11	0.55	-0.2	0.24	0.32	0.73	-0.2
SYNPO	Q8N3V7-2	1_Phospho	S887: Phospho	GWNGsLR	0.05	-0.13	0.17	0.03	1.17	0.61	0.45	0.79	0.61	0.47	1.24	0.4
PKM	P14618-3	1_Phospho	S234: Phospho	KAsDVHEVR; KAsDVHEVRK	0.82	1.62	0.96	1.32	-0.35	-0.41	1.13	1.72	1.6	1.29	-0.31	-0.51
FAM134A	Q8NC44	1_Phospho	S385: Phospho	QALDsEEEEEDVAAKETLLR; QALDsEEEEEDVAAK	0.43	0.63	0.31	0.16	0.39	0.18	0.34	-0.14	0.08	-0.05	0.24	0
ERF	P50548	1_Phospho	S327: Phospho	YLQAHTQSVYNYHLsPR	0.03	-0.22	-0.32	0.23	-0.19	-0.02	0.1	0.21	-0.15	0.36	0.08	-0.07
ESYT1	Q9BSJ8	1_Phospho	S1034: Phospho	TLsPEFNER	0.52	0.37	0.43	0.04	0.13	-0.38	0.83	0.36	0.43	0.11	0.32	-0.21
FAM195B	C9JLW8	1_Phospho	S21: Phospho	TSSPRsPPSSSEIFTPAHEENVR; sPPSSSEIFTPAHEENVR	0.2	0.45	-0.22	-0.1	-0.25	0.33	-0.03	-0.16	-0.07	0.12	0	-0.05
BCKDK	O14874	1_Phospho		STSATDTHHVEMAR	0.57	0.54	0.42	0.32	0.3	-0.14	0.39	0.34	0.04	0.17	0.13	-0.05
DIDO1	Q9BTC0-1	1_Phospho	S1030: Phospho	YLSVPPsPNISTSESR	-0.04	0.34	0.03	0.05	0.07	0.06	-0.21	0.18	0.06	-0.33	-0.54	0.11
TAF12	Q16514	1_Phospho	S51: Phospho	IPGTPGAGGRLsPENNQVLTK; LsPENNQVLTK; IPGTPGAGGRLsPENNQVLTKK	-0.12	0.24	0.01	-0.12	0.14	-0.25	0.06	0.25	0.03	0.21	0.1	0.4
MAP1S	Q66K74	1_Phospho	S640: Phospho	TPsPESHRSPAEGSER	0.31	0.6	0.15	0.6	0.24	0.11	0.37	-0.21	0.4	0.07	0.3	-0.44
MKI67	P46013-2	1_Phospho	S224: Phospho	AQSLVISPPAPsPR	-0.11	-0.04	0.25	0.12	-0.08	0.43	-0.37	-0.3	-0.13	-0.22	-0.35	0.41
PKD2	Q13563	1_Phospho	S812: Phospho	SLDDsEEDDDEDSGHSSRR; SLDDsEEDDDEDSGHSSR	0.47	1.15	1.13	0.1	-0.44	-0.94	-0.09	0.21	0.03	-1.44	-0.89	-0.29
PTPRU	Q92729-4	1_Phospho	S843: Phospho	SGGVTEASSLLGGsPR	0.65	0.95	0.53	0.63	1.27	-1.62	0.49	0.49	0.13	0.05	0.87	-0.78
IRF2BP2	Q7Z5L9-3	2_Phospho	S33: Phospho; S36: Phospho	NSNsPPsPSSMNQR	0.18	0.55	-0.32	0.46	0.33	0.94	-0.06	-0.91	-0.19	0.25	-0.02	-0.54
PTPN21	Q16825	1_Phospho	S637: Phospho	RNsIEVAGLSHGLEGLR	-0.2	-0.59	-0.36	0.07	-0.6	0.46	-0.12	-0.17	-0.04	-0.13	-0.02	-0.07
THRAP3	Q9Y2W1	2_Phospho	S534: Phospho; S535: Phospho	AVQEKSssPPPR	0.4	0.51	0.06	0.33	0.25	0.31	0.42	0.04	0.07	0.22	0.17	-0.16
SLX4	Q8IY92	1_Phospho	S1185: Phospho	ALEIsPR; KALEIsPR	0.24	-0.05	-0.08	0.21	-0.42	-0.03	0.38	0.11	-0.09	0.11	-0.36	0.19
CEP170	Q5SW79-2	2_Phospho	S1405: Phospho	QKSSPVNNHHsPGQTPTLGQPEAR; SSPVNNHHsPGQTPTLGQPEAR	-0.03	-2.04	-0.29	-0.36	-0.15	-0.08	-0.26	-1.03	-0.42	-0.81	-0.17	-0.12
ARHGAP18	Q8N392	1_Phospho	T158: Phospho	VETVSQtLR	0.18	0.41	0.33	0.31	0.27	0.73	-0.08	0.21	0.33	0.31	0.02	1.2
BCLAF1	Q9NYF8	2_Phospho	S287: Phospho; S290: Phospho	SGSGSVGNGSSRYSPsQNsPIHHIPSR; SGSGSVGNGSSRYSPsQNsPIHHIPSRR	-1.89	0.36	-0.62	0.19	-0.71	0	-0.34	-0.71	-0.24	-0.01	0.19	-0.01
ZNF330	Q9Y3S2	1_Phospho	S291: Phospho	KDsDTESSDLFTNLNLGR	-0.76	0.04	-0.57	-0.45	-0.45	-0.06	-0.44	-0.51	-0.72	-0.53	0	0.2
NOTCH2	Q04721	1_Phospho	S1836: Phospho	GPDGCTPLMLAsLR	0.5	0.26	-0.11	-0.14	-0.67	-0.46	0.66	0.68	0.42	0.74	0.08	0.19
EEF1D	P29692-2	1_Phospho	S410: Phospho	QENGAsVILR	-0.63	-0.75	-0.48	-0.69	-2.14	0.41	0.45	0.57	0.16	0.06	0.26	0.06
MAPK6	Q16659	1_Phospho	S189: Phospho	GHLsEGLVTK	-0.24	-0.86	-0.69	-0.08	0.29	0.11	1.11	1.11	0.99	0.86	1.3	-0.85
KIF13B	Q9NQT8	1_Phospho	S1644: Phospho	ERPDLEAPAPGsPFR	0.16	0.01	0.82	0.31	0.66	-0.01	0.34	-0.09	0.58	-0.01	0.45	0.22
TOPBP1	Q92547	1_Phospho	S888: Phospho	NAVALSAsPQLK	0.26	0.11	0.31	0.54	0.21	0.65	0.19	0.29	-0.19	0.5	0.36	0.21
SRRM2	Q9UQ35	3_Phospho	S2030: Phospho; S2032: Phospho; T2034: Phospho	sRsRtPLLPR	-0.5	-0.02	-0.79	0.77	-0.44	1.83	-0.15	-1.12	0.37	0.74	0.53	-0.3
PCM1	Q15154	2_Phospho	S65: Phospho; S69: Phospho	VTNDIsPESsPGVGR	0.27	0.32	0.15	-0.07	0.14	0.23	-0.02	-0.57	0.15	-0.16	0.14	0.56
ACIN1	Q9UKV3-5	1_Phospho	S837: Phospho	GVPAGNsDTEGGQPGRK; GVPAGNsDTEGGQPGR	0.06	0.27	0.19	0	0.29	0.42	-0.11	0.13	0.11	-0.1	0.06	0.27
ACIN1	Q9UKV3-5	1_Phospho	S710: Phospho	RLsQPESAEK	0.3	-0.17	0.11	0.27	-0.27	-0.28	0.46	0.07	0.1	0.35	0.1	0.13
MOB1A	Q9H8S9	1_Phospho	T35: Phospho	HAEAtLGSGNLR	0.54	0.19	-0.05	0.27	0.47	0.21	0.35	0.23	0.14	0.4	0.17	0.16
RGS3	P49796-6	1_Phospho	S702: Phospho	DLPAIQEsPTR	0.09	-0.04	-0.1	-0.38	0.08	-0.91	0.19	0.04	-0.56	-0.5	-0.06	-0.39
MCC	P23508-2	1_Phospho	S484: Phospho	LQSVQATGPSsPGR; LQSVQATGPSsPGRLTSTNRPINPSTGELSTSSSSNDIPIAK	-0.3	-0.45	-0.09	-0.37	0.26	0.45	-0.36	-0.66	-0.52	-0.75	0.2	0.37
SEC31A	O94979	1_Phospho	S799: Phospho	AQGEPVAGHEsPKIPYEK; AQGEPVAGHEsPK	0.03	0.07	0.1	-0.2	0.06	-0.24	0.18	0.31	-0.02	0.1	0.11	0.1
PDLIM7	Q9NR12	1_Phospho	T251: Phospho	HSQPAtPTPLQSR	-0.01	0.14	-0.49	-0.81	0.34	0.1	-0.72	0.09	-0.17	0.32	-0.65	-0.25
PYGO2	Q9BRQ0	1_Phospho	S40: Phospho	AGLQMKsPEKK; AGLQMKsPEK	0.11	-0.07	0.15	-0.23	-0.03	-0.1	0.28	0.37	0.59	0.34	0.39	0.21
VIM	P08670	1_Phospho	S420: Phospho	ISLPLPNFSsLNLR; ISLPLPNFSsL	0.49	0.04	0.03	-0.4	0.03	0.05	0.61	-0.07	-0.11	-0.69	-0.08	0.36
CCSAP	Q6IQ19	1_Phospho	S145: Phospho	ETDKsPTSTEPR	0.12	-0.06	-0.46	0.35	0.11	-0.24	0.18	0.14	-0.11	0.49	0.12	-0.5
GMDS	O60547	1_Phospho	S14: Phospho	GsGDGEMGKPR	0.46	0.48	0.06	-0.79	0.47	-0.11	0.03	-0.14	-0.81	-1.45	-0.1	0.63
CCDC6	Q16204	1_Phospho	S244: Phospho	LDQPVsAPPsPR; LDQPVSAPPsPR	0.07	0.1	-0.5	-0.01	0.07	-0.29	0.06	0.2	-0.09	-0.04	-0.04	-0.34
PHF20	Q9BVI0	1_Phospho	S488: Phospho	SLEPEEsPGKR	-0.24	0	0.31	0.26	0.12	0.4	-0.17	-0.16	0.17	0.39	-0.02	0.55
TNKS1BP1	Q9C0C2	1_Phospho	S178: Phospho	KEVLAsPDRLWGSR; EVLAsPDRLWGSR; KEVLAsPDR	0.21	0.06	0.02	-0.55	0.15	0.39	0.07	-0.21	0.17	-0.53	0	0.23
NRXN3	Q9HDB5	1_Phospho	S10: Phospho	RsPPR	0.01	-0.02	0.2	-0.47	-0.52	-0.02	0.08	-0.17	-0.14	0.13	-0.53	1.25
ILK	Q13418	1_Phospho	T181: Phospho	NGtLNKHSGIDFK	0.48	-0.05	-0.32	0.54	0.14	0.3	0.14	0.25	0.3	0.2	0.1	-0.76
BCAR3	O75815	1_Phospho	S370: Phospho	TGsEPALSPAVVR	1.27	1.05	-0.22	-0.05	0.82	-0.57	0.93	0.8	0.32	0.19	0.57	-0.5
AAK1	Q2M2I8	1_Phospho	S637: Phospho	RILsDVTHSAVFGVPASK; ILsDVTHSAVFGVPASK	-0.03	-0.69	-0.85	0.16	0.72	-0.31	-0.07	0.32	0.05	0.5	0.32	-0.75
CRTC3	Q6UUV7-3	1_Phospho	S62: Phospho	LTQYHGGsLPNVSQLR	0.21	-0.08	0.01	0.15	0.07	-0.21	0.58	0.47	0.38	-0.12	0.05	0.05
ZC3H13	Q5T200	2_Phospho	S875: Phospho; S877: Phospho	sLsPSHLTEDR	0.11	0.09	0.18	0.26	0.09	0.48	0.18	-1.33	-0.08	0.01	-0.17	-0.23
LMNA	P02545-3	1_Phospho	S406: Phospho	ASSHsSQTQGGGSVTKK; GRASSHsSQTQGGGSVTK; ASSHsSQTQGGGSVTK	0.69	0.32	-0.07	0.55	0.85	0.48	0.42	-0.2	0.3	-0.56	0.09	-0.8
HSPA5	P11021	No Phospho		IEIESFYEGEDFSETLTR; ITPSYVAFTPEGER	0.25	-0.39	-0.41	0.27	0.18	0.53	-0.62	-2.01	-1.56	-1.12	-0.78	0.9
RNPS1	Q15287-3	No Phospho		RFSPPRR	0.36	0.65	0.26	0.13	0.14	1.49	-0.03	0.41	0.19	0.1	0.1	-0.17
ATXN7L3B	Q96GX2	1_Phospho	S92: Phospho	sPPEFQ; LPLCSLPGEPGNGPDQQLQRsPPEFQ	-0.48	-0.04	-0.33	-0.65	-0.11	0.14	-0.16	-0.11	-0.15	-0.22	0.04	0.48
AKAP13	Q12802	1_Phospho	S1565: Phospho	HsWGPGK; RHsWGPGK	0.37	-0.68	-0.52	0.02	-0.14	-0.05	1.39	1.26	1.52	1.27	1.24	-0.42
MTRR	Q9UBK8	1_Phospho	S198: Phospho	GQEEISGALPVAsPASSR	-1.39	0.75	0.32	-0.47	0.47	0.33	-0.2	0.17	-0.27	0.44	0.54	0.04
RGS3	P49796-6	1_Phospho	S813: Phospho	SsMIETGQGAEGGLSLR; RSsMIETGQGAEGGLSLR	0.24	-0.55	-0.32	0.34	-0.17	-0.85	0.07	0.37	0.01	0.26	0.34	-0.55
ARHGEF28	Q8N1W1-5	1_Phospho	S445: Phospho	sVPGTTLESFR; sVPGTTLESFRR	0.12	0.21	0.27	-0.18	-0.04	0.34	0.05	0.3	0.35	-0.12	-0.08	0.55
TNIK	Q9UKE5	1_Phospho	S660: Phospho	FDRSsWLR	0.53	0.27	-0.39	0.55	0.13	-0.67	-0.06	0.07	0.71	0.36	0.19	-0.8
HERC1	Q15751	1_Phospho	T2701: Phospho	AQtPPISSLPTSPSDEVGR	0.15	0.01	-0.02	-0.16	0.39	-0.01	0.42	0.84	-0.08	-0.18	0.43	-0.25
FAM64A	Q9BSJ6	1_Phospho	S131: Phospho	GSGsPTHSLSQK	-0.65	-0.13	0.19	0.36	-0.05	0.14	-0.66	-0.48	-0.52	-0.13	-0.33	0.44
PPP1R14A	Q96A00-2	2_Phospho	S101: Phospho; S109: Phospho	QPGLRQPsPSHDGSLsPLQDR; LQGLHRQPGLRQPsPSHDGSLsPLQDR; QPsPSHDGSLsPLQDR	-0.95	0.54	0.38	0	0.98	-0.86	0.11	0.03	0.3	0.36	0.73	0.08
HIVEP3	Q5T1R4	1_Phospho	S1964: Phospho	DTGSALSYKPVsPR	0.37	0.45	0.54	0.42	0.53	-0.21	-0.06	0.23	0.3	0.03	0.49	-0.19
FMNL3	Q8IVF7	1_Phospho	S174: Phospho	sIEDLQPPSALSAPFTNSLAR	0.56	-0.1	0.16	0.4	0.06	0.3	-0.2	-0.1	-0.51	0.42	-0.33	-0.08
SP100	P23497	1_Phospho	S171: Phospho	SGLQLsLEQGTGENSFR	0.29	0.93	0.67	0.59	0.13	1	0.29	0.35	0.03	-0.09	0.22	-0.21
MAP1S	Q66K74	1_Phospho	S731: Phospho	SAsPHDVDLCLVSPCEFEHR; SAsPHDVDLCLVSPCEFEHRK	0.22	0.08	1.11	0.16	0.24	0.29	-0.09	0.05	-0.15	0.11	0.35	-0.09
MACF1	Q9UPN3-3	1_Phospho	S2373: Phospho	SMDAMSsPTKTETVK; SMDAMSsPTK	-0.59	-1.18	-0.02	-0.68	-0.45	-0.27	-0.44	-0.83	-0.43	-0.52	-0.43	-0.03
STXBP1	P61764-2	1_Phospho	S507: Phospho	SsASFSTTAVSAR	0.69	0.29	0.06	0.42	0	0.24	0.27	0.14	-0.1	0.58	-0.4	-0.15
TGFB1I1	O43294-2	2_Phospho	S120: Phospho; S124: Phospho	RPsLPSsPSPGLPK; KRPsLPSsPSPGLPK	-0.88	-0.61	-0.21	-1.23	-0.82	0.05	-0.98	-0.65	-0.59	-0.74	-1.06	0.21
RALGAPA1	Q6GYQ0-5	1_Phospho	T754: Phospho	QKtVDIDDAQILPR	-0.01	-0.04	0.11	-0.52	-0.75	0.01	0.18	-0.05	0.08	-0.29	-0.16	0.11
SRRM2	Q9UQ35-2	3_Phospho	S1101: Phospho; S1102: Phospho; S1112: Phospho	ssSPVTELASRsPIRQDR; ssSPVTELASRsPIR	-1.27	-0.05	-0.89	0.26	-0.7	1.36	0.35	-0.83	0.87	0.83	0.95	-0.23
SPTBN1	Q01082	1_Phospho	T2187: Phospho	TALPAQSAAtLPAR	-0.73	-0.68	0.12	0.29	-0.59	-1.55	-0.9	-0.62	-0.19	-0.02	-1.11	-0.38
RRBP1	Q9P2E9	1_Phospho	S959: Phospho	IRsIEALLEAGQAR	1	1.81	-0.56	1.08	-0.2	-1.56	0.4	0.33	-0.26	0.19	-0.34	-0.65
HIST1H3A	P68431	1_Phospho	T46: Phospho	YRPGtVALR	0.91	0.35	0.47	0.45	0.28	-0.02	0.92	1.01	0.45	0.85	0.26	-0.05
EPB41	P11171-2	1_Phospho		RLSTHSPFR; SLDGAAAVDSADRSPRPTSAPAITQGQVAEGGVLDASAK; SLDGAAAVDSADRSPRPTSAPAITQGQVAEGGVLDASAKK	-0.28	0.64	0.48	-0.6	-0.13	0.97	-1.42	-0.37	-1.16	-0.79	-0.77	0.87
HELZ2	Q9BYK8	1_Phospho	S338: Phospho	SSVASGPIsPTNYR	0.56	0.15	0.04	-0.19	0.77	0.28	0.19	-0.14	-0.49	-0.22	0.15	0.16
TRIP10	Q15642-2	2_Phospho	S296: Phospho; S299: Phospho	APsDSsLGTPSDGRPELR	-0.5	0.31	0.4	-0.06	0.37	-0.04	-0.09	0.45	-0.06	0.24	0.14	0.22
EML4	Q9HC35	1_Phospho	S176: Phospho	RPsPAEK	-0.92	-0.3	0.23	-0.06	-0.72	0.11	-0.98	0.29	-0.71	-0.16	-0.49	0.51
TEX2	Q8IWB9	1_Phospho	S196: Phospho	SLsTEVEPK	0.4	0.7	0.81	1.18	0.22	0.32	0.04	0.28	-0.38	-0.5	-0.77	0.37
ANKLE2	Q86XL3	1_Phospho	S268: Phospho	TSLPLsPVK	-0.83	-0.7	0.42	-0.5	-0.55	0.4	-1	-0.48	0.04	-0.61	-0.68	0.89
NCL	P19338	1_Phospho	T76: Phospho	VAVAtPAK; VAVAtPAKK	-0.13	-0.48	0.09	-0.23	-0.08	0.69	-0.4	-0.07	-0.14	-0.06	-0.09	0.98
COL19A1	Q14993	1_Phospho	S81: Phospho	LGsALLIR	0.73	0.42	-1.67	-0.11	0.1	-0.05	0.99	0.9	0.44	0.03	0.22	-1
SIPA1L1	O43166-2	1_Phospho	S1181: Phospho	RsPASIDR	0.19	0.29	0.11	0.08	0.04	-0.88	1.43	1.48	1.46	1.47	1.81	-0.48
AHCTF1	Q8WYP5-3	1_Phospho	S1169: Phospho	SLPSSSQLKGsPQAISR	0.38	-0.28	0.18	0.21	0.15	-0.02	0.21	0.09	0.2	0.23	0.12	0.12
AP3D1	O14617-5	1_Phospho	S658: Phospho	HRPsEADEEELAR	-0.1	-0.04	-0.45	-0.07	0.24	0.29	0.38	-0.57	-0.15	0.2	0.29	-0.39
RRP8	O43159	1_Phospho	S223: Phospho	TEVsPVPR	0.17	0.08	0.09	-0.02	-0.22	0.14	0.19	0.4	0.24	0.4	0.14	0.66
CDC42EP1	Q00587-2	2_Phospho	S343: Phospho; S346: Phospho	AsWEsLDEEWR; AsWEsLDEEWRAPQAGSR	0.22	0.51	0.76	0.47	0.38	0.85	0.45	-0.59	-0.18	0.26	-0.21	-0.46
SEC16A	O15027	1_Phospho	S891: Phospho	AQQELVPPQQQAsPPQLPK	-0.66	-0.22	0.12	0.17	0.12	-0.21	-0.5	-0.14	-0.18	0.19	-0.04	-0.16
PTPLAD1	Q9P035	1_Phospho	S114: Phospho	WLDEsDAEMELR	0.64	0.85	0.38	0.75	0.32	0.1	0.48	0.06	0.23	0.45	0.11	-0.17
SRRM2	Q9UQ35-2	2_Phospho	S875: Phospho; S876: Phospho	SCFEssPDPELK	-0.37	0.14	0.24	0.45	-0.24	0.74	-0.49	-0.55	0	0.05	0.02	0.12
CLASP2	O75122	1_Phospho	S529: Phospho	IPRPSVSQGCsR	-0.19	0.23	-0.06	0.18	-0.08	-0.09	-0.29	0.04	0.1	0.08	-0.02	0.23
SH3PXD2A	Q5TCZ1-3	1_Phospho	S519: Phospho	EAEEGPTGASESQDsPR	1.15	1.28	0.87	0.12	0.84	-0.55	0.23	-0.49	0.05	-0.27	0.54	-0.14
GAPVD1	Q14C86	1_Phospho	S902: Phospho	sSDIVSSVR	-0.45	-0.16	-2.35	-0.26	0.08	-0.15	0.04	0.71	0.08	0.36	0.12	-0.21
TTN	Q8WZ42	1_Phospho	S21720: Phospho	AGLsIR	-0.56	0.01	0	0.01	-0.71	0.33	-1.1	-0.69	-0.52	-0.35	-1.09	1.06
FBXO4	Q9UKT5	1_Phospho	S12: Phospho	SGTNsPPPPFSDWGR	0	0.51	0.65	0.23	-0.5	-0.72	-0.07	0.32	0.38	-0.05	-0.86	-0.34
AHNAK	Q09666	1_Phospho	S5731: Phospho	GGVTGsPEASISGSKGDLK; GGVTGsPEASISGsK; GGVTGsPEASISGSK; GKGGVTGsPEASISGSKGDLK; GKGGVTGsPEASISGSK	0.11	0.24	0.61	-0.01	0.21	-0.1	0.44	0.5	0.63	0.25	0.46	0.32
HNRNPU	Q00839	1_Phospho	T582: Phospho	NFILDQtNVSAAAQR	-0.47	-0.22	-0.4	-0.36	-0.48	-0.29	0.02	-0.19	-0.57	0.25	-0.11	-0.08
RBMXL1	Q96E39	1_Phospho	S249: Phospho	DYGHsSSRDDYPSR; DYTYRDYGHsSSR	0.2	0.13	-0.25	0.37	0.18	0.14	0.56	-0.13	0.3	0.47	0.79	-0.35
SNIP1	Q8TAD8	2_Phospho	S52: Phospho; S54: Phospho	RPDHSGGsPsPPTSEPAR	-0.3	0.44	0.3	0.17	-0.02	0.75	-0.35	-0.88	-0.95	-0.3	-0.61	0.37
NCOR1	O75376	1_Phospho	S1472: Phospho	AQLsPGIYDDTSAR	-0.2	0.19	0.16	0.16	-0.1	0.2	-0.23	0.04	-0.3	0.05	-0.49	0.34
SYNPO	Q8N3V7	1_Phospho	S548: Phospho	MMGQRsPASER	0.29	-0.08	0.01	-0.25	0.38	0.5	-0.6	-0.96	-0.48	-0.85	0.21	0.01
ARFGAP2	Q8N6H7	1_Phospho	S146: Phospho	HGTDLWIDNMSSAVPNHsPEKK; HGTDLWIDNMSSAVPNHsPEK	0.08	-0.27	-0.84	0.37	-0.38	0.24	0.09	0.01	-0.13	-0.18	-0.05	-0.27
CCNT2	O60583	1_Phospho	S480: Phospho	QGQSQAASSSSVTsPIKMK; QGQSQAASSSSVTsPIK	-0.42	-0.49	0.13	-0.25	-0.25	0.03	-0.53	-0.41	-0.01	-0.13	0.26	0.09
LIMCH1	Q9UPQ0-4	1_Phospho	S303: Phospho	SWSTATsPLGGERPFR	-1.25	-0.08	0.72	-0.18	-0.86	-0.2	-1.29	0.16	0.79	0.01	-1.14	-0.09
KIF26B	Q2KJY2-2	1_Phospho	S1304: Phospho	AEsLSSVSSR	1.42	1.9	1.06	1.56	0.28	-1	1.76	1.79	1.09	1.3	0.45	-0.4
LIMD1	Q9UGP4	1_Phospho	S424: Phospho	EGPLGWSSDGSLGSVLLDSPSsPR	0.21	-0.14	0.49	-1.44	1.01	1.4	0.31	0.28	0.42	0.2	0.56	0.06
DCTPP1	Q9H773	1_Phospho	S85: Phospho	TDGEPGPQGWsPR	0.17	-0.5	-0.03	0.05	-0.43	0.28	0.29	-0.35	0.56	0.08	-0.49	-0.68
PRRC2C	Q9Y520-5	1_Phospho		SVSHGSNHTQKPDEQR; STTPTSSPFR; SVEDVRPHHTDANNQSACFEAPDQK	0.1	0.13	0.49	0.24	0.27	0.34	0.02	-0.18	0.03	-0.28	0.34	-0.04
MAP7D1	Q3KQU3	1_Phospho	S125: Phospho	SSQPSPTAVPASDsPPTK	-0.69	-0.39	-0.36	-0.67	-0.18	0.77	-0.71	0.28	-0.03	0.27	-0.07	-0.04
CRTC2	Q53ET0	1_Phospho	S456: Phospho	QFsPTMSPTLSSITQGVPLDTSK	-0.94	-1.04	-0.43	-2.18	0.07	-0.21	-0.14	0.21	0.25	-0.54	0.22	-0.16
MARK2	Q7KZI7-8	1_Phospho	T208: Phospho	LDtFCGSPPYAAPELFQGK	-0.31	0.67	-0.14	-0.01	0.16	-0.96	-0.06	0.65	0.34	0.28	0.12	-0.38
RUSC2	Q8N2Y8	1_Phospho	S506: Phospho	sPPVRLGSLER	0.28	3.04	-0.1	0.68	0.25	-0.14	-0.01	0.16	-0.46	-0.04	-0.19	-1.33
AMFR	Q9UKV5	1_Phospho	S542: Phospho	VPLDLsPR	0.04	-0.11	0.48	0.16	0.36	0.19	-0.5	-0.66	-0.18	-0.23	0.08	0.58
PARD3	Q8TEW0-8	1_Phospho		AEDEDIVLTPDGTR; SSLSASHPMVGK; ISHSLYSGIEGLDESPSR	0.07	-0.46	0.23	0.37	0.27	0.3	-0.93	-1.24	-0.69	0.1	0.33	0.4
TIAM1	Q13009	1_Phospho	S695: Phospho	FSsLWGLDTTSK	-0.12	-0.73	-1.45	-0.11	0.2	-0.03	0.3	0.23	0.07	0.04	0.46	-1.56
SH3BP2	P78314	1_Phospho	S416: Phospho	sPPDGQSFR; PAVLPRPEKPQLPHLQRsPPDGQSFR	-0.02	0.55	0.13	0.03	-0.24	-0.28	0.15	0.42	0.12	0.26	-0.3	0.24
RBBP6	Q7Z6E9-2	1_Phospho	S360: Phospho	NLQPLMRsPISR	0.36	0.22	0.28	0.21	0.18	0.22	0.17	-0.14	0.11	-0.33	-0.02	0.23
ZNF638	Q14966	1_Phospho	S552: Phospho	IRNPFRGsPK; NPFRGsPK	0.13	0.18	0.03	0.14	-0.06	-0.23	0.19	0.04	-0.08	0.11	-0.03	0.01
FLRT1	Q9NZU1	1_Phospho	S582: Phospho	KDNsILEIR; DNsILEIR	1.44	0.61	-0.39	0.97	-0.02	-0.41	1.5	0.59	0.88	0.79	-0.69	-0.68
MARCKS	P29966	1_Phospho	S101: Phospho	GEPAAAAAPEAGAsPVEK; EELQANGSAPAADKEEPAAAGSGAASPSAAEKGEPAAAAAPEAGAsPVEK	-0.42	-0.25	-0.12	-0.07	-0.65	0.11	-0.13	-0.38	-0.47	0.31	0.13	0.94
CENPC1	Q03188	1_Phospho	S316: Phospho	sWITIPR	0.02	-0.42	0.13	-0.04	-0.03	0.12	0.07	-0.34	-0.14	-0.15	-0.09	0.24
MMP14	P50281	1_Phospho	S577: Phospho	sLLDKV; LLYCQRsLLDKV	0.02	0.48	0.5	0.28	0.49	-0.82	-0.37	0.25	-1.08	-0.19	0.13	0.06
IRF2BPL	Q9H1B7	2_Phospho	S658: Phospho; S659: Phospho	RNSssPVSPASVPGQR	0.49	-0.02	-0.32	0.19	0.6	0.21	-0.25	-0.95	-1.2	-0.52	-0.08	0.08
PAK2	Q13177	1_Phospho	S132: Phospho	FYDsNTVK	0.75	0.66	-0.13	0.42	0.59	0.13	0.79	0.68	0.58	0.55	0.58	-0.51
BACH2	Q9BYV9	1_Phospho	S510: Phospho	VCPRsPPLETR	0.11	0.29	0.26	0.69	0.78	-0.43	0.11	0.42	-0.16	0.63	0.39	-0.51
PLEC	Q15149-6	1_Phospho	S4487: Phospho	GYYSPYSVSGsGSTAGSR; GYYSPYSVSGsGsTAGSR	0.24	0.58	0.77	0.29	0.3	0.06	-0.07	0.28	0.29	0.34	-0.07	-0.02
PGRMC1	O00264	1_Phospho	S57: Phospho	GDQPAASGDsDDDEPPPLPR; IVRGDQPAASGDsDDDEPPPLPR	-0.2	0.45	-0.14	-0.87	0.38	0.63	0.06	-0.02	-0.22	-0.08	0.35	0.37
EIF5B	O60841	1_Phospho	S113: Phospho	QSFDDNDsEELEDKDSK; KQSFDDNDsEELEDKDSK	-0.45	-0.32	-0.23	-0.15	-0.29	0.88	0.25	0.05	0.24	0.1	0.23	0.16
RTN4	Q9NQC3-4	1_Phospho	S15: Phospho	EDLDQSPLVSSSDsPPRPQPAFK; MEDLDQSPLVSSSDsPPRPQPAFK; DLDQSPLVSSSDsPPRPQPAFK	0.33	0.97	0.7	1.49	0.53	1.07	-0.2	-0.3	-0.47	-0.57	-0.98	0.56
TNKS1BP1	Q9C0C2	1_Phospho	S1297: Phospho	NMAPGAVCsPGESK	-0.38	-0.2	-0.1	-0.46	-0.46	0.32	-0.16	-0.41	-0.3	-0.41	-0.36	0.64
IGF2R	P11717	1_Phospho	S2479: Phospho	LVsFHDDSDEDLLHI	-0.52	0.22	-0.19	0.22	-0.27	0.11	-0.35	-0.32	-0.95	-0.56	-0.05	0.34
HNRNPA2B1	P22626-2	1_Phospho	S332: Phospho	NMGGPYGGGNYGPGGSGGsGGYGGR	0.44	-0.15	-0.11	-0.35	0.09	0.25	0.23	-0.05	-0.26	-0.16	0.03	-0.23
CAPN2	P17655-2	1_Phospho	S384: Phospho	ERsDTFINLR	-0.01	0.16	-1.03	-0.26	0.15	-0.18	0.13	0.1	-0.14	0.14	0.06	-0.63
SLX4IP	Q5VYV7	1_Phospho	S396: Phospho	LSTIQNsPTK	0.18	-0.59	-0.22	0.11	-0.16	-0.13	0.7	0.52	0.62	0.62	0.53	0.8
BCAR3	O75815	1_Phospho	S363: Phospho	LPPQSSGVDTSPCPNsPVFR	0.05	0.24	0.26	-0.97	1.13	0.39	-0.2	0.17	-0.28	-0.53	0.83	0.45
BAIAP2	Q9UQB8-5	1_Phospho	T360: Phospho	NSYATTENKtLPR	0.34	-0.07	0.19	0.38	0.41	-0.07	0.31	-0.1	0.54	0.53	0.53	0
RIN1	Q13671	1_Phospho	S349: Phospho	sMSAAFCSLLAPER	0.93	1.06	0.28	0.91	0.75	-0.65	-0.19	-0.05	0.18	-0.21	-0.18	0.03
CENPT	Q96BT3	1_Phospho	S397: Phospho	AAsPESASSTPESLQAR	-0.13	0.39	0.08	-0.11	0.06	0.23	-0.52	-0.68	-0.2	-0.32	-0.46	0.35
H2AFX	P16104	1_Phospho	S122: Phospho	KTsATVGPK	0.22	-0.09	0.03	0.08	0.06	0.35	0.06	-0.19	0.05	0.08	0.11	0.02
SCARF2	Q96GP6-2	1_Phospho	S737: Phospho	DPTPRPPGLPEEATALAAPsPPR; TRDPTPRPPGLPEEATALAAPsPPR	-0.56	0.43	-0.48	0.27	-0.02	-1.35	-0.48	0.26	-1.51	0.21	-0.07	0.51
PRKD3	O94806	1_Phospho	S41: Phospho	LsNGSFSAPSLTNSR	-0.15	0.89	0.88	0.24	0.88	0.33	-0.8	-0.15	-0.62	0.01	0	-0.58
TPX2	Q9ULW0	1_Phospho	S738: Phospho	SSDQPLTVPVsPK	-0.12	-0.4	-0.92	0.13	0.12	0.49	0.11	0.2	0.41	0.35	0.36	-0.67
MLL	Q03164	1_Phospho	S2098: Phospho	TIAHsPTSFTESSSK	0.21	-0.07	0.01	0.12	-0.06	0.03	0.05	-0.09	-0.04	0.05	-0.16	0.32
CNOT2	Q9NZN8-5	1_Phospho	S165: Phospho	TNSMSSSGLGsPNR	-0.13	-0.01	-0.44	-0.11	-0.16	0.01	-0.11	0.1	-0.42	-0.32	-0.42	0.16
PPP1R18	Q6NYC8	1_Phospho	S195: Phospho	RLsPGETPER; LsPGETPER; WRLsPGETPER	-0.04	-0.22	0.09	-0.24	0.05	0.24	0.13	-0.25	-0.18	-0.23	0.06	0.32
PACS1	Q6VY07	1_Phospho	S430: Phospho	DTTsPMELAALEK; GSLGKDTTsPMELAALEK	0.27	-0.59	-0.16	-0.21	-0.27	0.68	0.17	-0.36	-0.21	-0.84	0.01	0.62
DLG1	Q12959-2	1_Phospho	S517: Phospho	IISVNsVDLR	0.03	0.1	0.53	-0.11	-0.38	-0.31	0.38	0.28	0.48	0.53	-0.02	0.38
CSNK1G3	Q9Y6M4-3	1_Phospho		NQVVSSTNGELNTDDPTAGR; GTGSSSSGVLMVGPNFR	0.31	1.09	0.22	0.93	0.65	1.13	-0.15	-0.54	0.24	0.64	-0.55	-0.24
NCL	P19338	1_Phospho	S67: Phospho	KVVVsPTKK; VVVsPTKK; KVVVsPTK; VVVsPTK	0.05	0.16	0.33	0.19	0.12	0.25	-0.26	-0.3	-0.1	-0.09	0.04	0.52
U2SURP	O15042	2_Phospho	S946: Phospho; S948: Phospho	VKsPsPK	-0.05	-0.25	-0.03	-0.31	-0.12	0.09	-0.22	-0.69	0.34	-0.32	-0.14	-0.07
NKTR	P30414	1_Phospho	S463: Phospho	ILIPsDIESSK	-0.16	0.44	0.14	0.13	-0.37	0.13	-0.06	0.34	-0.04	0	-0.12	0.36
EIF4B	P23588	1_Phospho	S504: Phospho	SQSSDTEQQsPTSGGGK	-0.38	-1.04	-0.43	-1.07	-1.08	0.31	-0.33	-0.56	-0.26	-0.48	0	0.38
TNS1	Q9HBL0	1_Phospho	S1400: Phospho	AGsLPNYATINGK	-0.07	0.3	0.47	0.4	0.36	-0.4	-0.26	0.12	0.22	0.07	0.25	-0.16
TACC2	O95359	1_Phospho	S2512: Phospho	FSsPTEELDYR	0.15	0.21	-0.54	0.23	0.47	0.53	-0.04	0.03	-0.56	-0.2	0.85	-0.33
DENND4C	Q5VZ89-3	1_Phospho	S45: Phospho	THsFENVSCHLPDSR	0.55	-0.7	0.81	0.66	0.51	0.26	0.54	0.63	0.89	0.7	0.58	-0.43
MAP4	P27816-5	1_Phospho	S280: Phospho	DMEsPTKLDVTLAK; DMEsPTKLDVtLAK; DMEsPTK	0.02	-0.12	0.37	0.19	-0.35	0.1	-0.26	0.1	-0.05	0.02	-0.15	0.37
WRAP53	Q9BUR4	1_Phospho	S54: Phospho	GDPPRLsPDPVAGSAVSQELR; NADSELMPPPPERGDPPRLsPDPVAGSAVSQELR	-0.07	0.49	0.03	0.24	0.19	-0.96	0.09	0.31	0.01	0.24	0.11	0.04
SLC35B2	Q8TB61-3	1_Phospho	S378: Phospho	KAVPVEsPVQKV; AVPVEsPVQKV	0.32	0.24	0.72	0.61	0.39	0.16	0.17	0.32	0.07	0.45	0.34	0.31
ETV3	P41162	1_Phospho	S139: Phospho	SSGVVPQsAPPVPTASSR	0.3	0.27	0.4	0.16	0.31	0.25	-0.2	-0.15	0.01	-0.07	-0.44	0.09
NOP16	Q9Y3C1	1_Phospho	S16: Phospho	FGYsVNR	0.15	0.16	0.31	0.25	-0.07	0.37	-0.59	0.26	-0.1	0.23	0.07	0.03
SH3PXD2A	Q5TCZ1-3	1_Phospho	S378: Phospho	LAQGsPAVAR	0.86	0.72	-0.15	-0.16	2.17	-0.47	-1.25	-1.38	-2.53	-2.28	-0.56	-0.26
AKIRIN2	Q53H80	2_Phospho	S18: Phospho; S21: Phospho	TLDFDPLLsPAsPKR; TLDFDPLLsPAsPK	0.2	-0.53	-0.42	-0.27	0.29	1.05	-0.08	-0.67	-0.23	-0.54	0.13	0.23
FLNB	O75369	1_Phospho	S2107: Phospho	APsVATVGSICDLNLK	-0.43	-0.77	0.08	-0.38	0.17	0.02	0.08	0.23	0.23	0.47	0.48	1.22
TET2	Q6N021-3	1_Phospho	S99: Phospho	TVsEPSLSGLLQIKK; TVsEPSLSGLLQIK	-0.08	-0.14	-0.17	0.6	-0.43	-0.5	0.33	0.48	0.16	0.54	-0.17	-0.46
FLNA	P21333-2	1_Phospho	S2172: Phospho	RAPSVANVGSHCDLSLKIPEISIQDMTAQVTsPSGK; APSVANVGSHCDLSLKIPEISIQDMTAQVTsPSGK; IPEISIQDMTAQVTsPSGK; IPEISIQDMTAQVtsPSGK	-0.54	-0.99	-0.07	-0.32	-1.24	0.51	-1.21	-0.88	-0.95	-0.58	-0.9	0.31
RBM12B	Q8IXT5	1_Phospho	S575: Phospho	HSSEDFRFPPEDFRHsPEDFR; FPPEDFRHsPEDFR	-0.17	0.1	-0.12	0.21	0	0.38	-0.07	-0.04	-0.28	0.16	0.12	0.2
BAIAP2	Q9UQB8	1_Phospho		AVQLMQQVASNGATLPSALSASK; SSSTGNLLDKDDLAIPPPDYGAASR; SSSMAAGLER	0.24	0.18	-0.44	-0.02	-0.15	-0.28	0.87	-2.25	-0.1	-2.01	0.3	0.13
LIMK1	P53667	1_Phospho	S310: Phospho	SPGAGSLGsPASQRK; SPGAGSLGsPASQR	-0.26	0.45	-0.01	-0.2	-0.07	0.23	-0.04	0.56	0.58	0.39	-0.18	0.17
TJP2	Q9UDY2-5	1_Phospho	S130: Phospho	VQVAALQAsPPLDQDDR; KVQVAALQAsPPLDQDDR	0.41	0.98	0.01	0.06	0.98	0.09	-0.6	-0.43	0.02	-0.51	0.12	0.61
TCF12	Q99081-3	1_Phospho	S67: Phospho	GGTTSWGTSGQPsPSYDSSR	0.21	0.3	0.18	-0.15	0.08	-0.04	-0.41	-0.54	-0.27	-0.18	-0.48	0.16
FLNA	P21333-2	1_Phospho	S968: Phospho	SPFSVAVSPsLDLSK	-0.12	-0.17	0.04	-0.21	0.25	-0.36	-0.42	-0.58	-0.61	-0.49	0.07	-0.26
LMNA	P02545-3	1_Phospho	S107: Phospho	LQLELsK	0.69	1	0.87	0.24	0.83	-0.41	0.84	0.95	0.72	0.26	0.83	0.32
BET1	O15155	1_Phospho	S50: Phospho	SLsIEIGHEVK	0.1	1.39	1.3	0.53	0.83	0.6	-1.15	0.3	0.68	-0.01	0.7	1.34
CCT8	P50990	No Phospho		GSTDNLMDDIER; KDWDDDQND	0.34	1.08	-0.15	0.01	0.45	0.16	0.51	0.56	0.13	0.87	0.15	0.07
EIF3A	Q14152	1_Phospho	S1188: Phospho	AREEsWGPPR; EEsWGPPR	0.53	0.21	0.06	-0.06	0.49	0.1	0.71	0.37	0.2	0.13	0.68	0.16
RAPH1	Q70E73-8	1_Phospho	S558: Phospho	TESAYDWTSLSSSsIK	0.07	0	-0.36	-0.01	0.57	0	0.55	0.38	-0.56	0.28	0.5	1
CDK7	P50613	1_Phospho	S164: Phospho	SFGsPNR	0	0.17	0.08	-0.31	0	-0.2	-0.2	0.12	-0.25	-0.21	-0.3	0.3
FAM122B	Q7Z309-3	1_Phospho	S134: Phospho	IDFTPVsPAPSPTR; RIDFTPVsPAPSPTR	0.26	0.42	0.23	0.47	0.17	-0.27	0.07	0.2	0.02	0.38	0.11	0.04
TMEM200A	Q86VY9	1_Phospho	S397: Phospho	sLDLDRGPSTLTVQAEQR	0.02	-0.44	-0.18	0.22	0.05	-0.2	0.09	-0.16	0.09	0.51	0.37	-0.22
CDC42EP2	O14613	2_Phospho	T137: Phospho; S141: Phospho	LHLEtPQPsPQEGGSVDIWR	-0.18	-0.98	-0.48	-0.6	0.36	0.13	1.42	1.39	1.61	1.32	1.72	-0.85
CSTF3	Q12996	1_Phospho	S691: Phospho	RPNEDsDEDEEKGAVVPPVHDIYR; RPNEDsDEDEEK; AVKRPNEDsDEDEEK; AVKRPNEDsDEDEEKGAVVPPVHDIYR	-0.08	0.09	0.16	-0.11	0.05	0.15	0.28	0.08	0.35	0.19	0.3	0.11
ATP13A1	Q9HD20-3	1_Phospho	S39: Phospho	DsPTLSNSGIR; RPRDsPTLSNSGIR	0.97	0.91	0.8	0.27	0.45	-0.58	1.02	0.42	0.32	0.1	0.17	0.51
ZC3H11A	O75152	1_Phospho	S495: Phospho	VQQSSESSTSsPSQHEATPGAR	-0.06	-0.15	-0.01	0.12	-0.13	0.33	0.15	0.37	0.56	0.38	-0.26	3.04
GIGYF2	Q6Y7W6	2_Phospho	S236: Phospho; S242: Phospho	WRPHsPDGPRsAGWR	1.02	0.5	0.79	0.55	0.67	0.81	0.79	1.2	1.2	0.75	0.87	0
YWHAQ	P27348	No Phospho		MKGDYFR; DNLTLWTSDSAGEECDAAEGAEN; AVTEQGAELSNEER	-0.04	0.62	0.39	-0.12	0.54	0.73	-0.03	0.14	0.37	0.54	0.18	0.17
ABCF1	Q8NE71-2	2_Phospho	T108: Phospho; S109: Phospho	KLSVPtsDEEDEVPAPKPR; LSVPtsDEEDEVPAPKPR	0.53	0.51	0.66	-0.21	0.51	0.77	0.51	0.35	0.53	0.39	0.39	0.31
SOGA2	Q9Y4B5	1_Phospho	S1808: Phospho	SAEPRPELGPGQETGTNsR	-0.59	-0.3	0.25	-0.42	-0.58	0	-0.79	-0.47	-0.13	-0.47	-0.85	0.06
ANKRD17	O75179-2	1_Phospho	S1708: Phospho	LTVAsPK; SGPSPLSSPNGKLTVAsPK	0.1	-0.04	0.11	-0.07	0.03	0.13	0.09	0.06	-0.22	-0.09	0.1	0.46
PKN2	Q16513-2	1_Phospho	S367: Phospho	SsFMSR; SKATSVALPGWSPSETRSsFMSR; ATSVALPGWSPSETRSsFMSR	0.06	-0.42	0.12	-0.04	-0.01	-0.06	0.06	-0.06	0.52	0.64	0.1	-0.07
SRSF7	Q16629-2	1_Phospho	S123: Phospho	GHYAYDCHRYsR	0.64	0.01	0.13	-1.61	0.26	-0.64	1.34	1.01	1.01	1	1.06	-0.36
GIT1	Q9Y2X7-3	1_Phospho	S371: Phospho	SLSsPtDNLELSLR; SLSsPTDNLELSLR	-0.29	-0.25	-0.03	-0.24	-0.64	-0.09	0.11	-0.05	0	-0.14	-0.54	0.03
NDRG3	Q9UGV2	1_Phospho	S333: Phospho	THSTsSSLGSGESPFSR; THStsSSLGSGESPFSR	0.19	-0.16	0.35	-0.19	0.7	0.47	-0.1	0.45	0.86	0.54	0.82	-0.19
MAP3K4	Q9Y6R4	1_Phospho	S1252: Phospho	HSsPTEERDEPAYPR	0.53	-0.22	-0.63	0.2	0.36	-0.05	0.85	0.26	0.58	0.31	0.78	-1.15
PRKAR2A	P13861	2_Phospho	T54: Phospho; S58: Phospho	APASVLPAAtPRQsLGHPPPEPGPDR	0.05	-0.05	-0.04	-0.07	0.05	1.15	-0.01	0.2	0.59	0.45	-0.37	0.21
CAMK2G	Q13555-9	1_Phospho	T287: Phospho	QEtVECLRK; QEtVECLR	0.26	0.37	0.22	0.2	0.11	0.01	0.33	0.43	0.1	0.11	0.27	0.09
EPN1	Q9Y6I3-3	1_Phospho	S409: Phospho	sPGAFDMSGVR	0.14	0.05	-0.06	0.05	0.42	-0.5	-0.09	-0.1	-1.2	-0.12	-0.09	0.7
PI4KA	P42356	1_Phospho	S207: Phospho	TSSVSSISQVsPER; KTSSVSSISQVsPER	0.09	-0.23	0.26	0.04	-0.01	0.04	-0.31	-0.46	-0.59	-0.29	-0.27	0.12
MOCOS	Q96EN8	1_Phospho	S530: Phospho	SLsPQEDALTGSR	-0.18	-0.22	0.25	0.03	-0.05	0.18	-0.96	-1.05	-0.26	-0.55	-0.26	0.3
CFL1	P23528	1_Phospho	S3: Phospho	AsGVAVSDGVIK; AsGVAVSDGVIKVFNDMK; AsGVAVSDGVIKVFNDMKVR; MAsGVAVSDGVIK; sGVAVSDGVIK; AsGVAVsDGVIK	0.34	0.48	0.51	0.17	0.23	0.18	0.12	0.35	0.27	-0.11	-0.09	0.19
ACLY	P53396	1_Phospho	S481: Phospho	AKPAMPQDSVPsPR; KAKPAMPQDSVPsPR	0.19	0.35	0.17	0.08	0.09	-0.24	0.07	0.29	0.01	-0.14	0.03	-0.03
DOCK7	Q96N67	1_Phospho	S1432: Phospho	SPsGSAFGSQENLR	0.11	0.11	0.12	0.08	0.22	-0.22	-0.1	0.19	-0.14	-0.14	-0.17	0.07
MED26	O95402	1_Phospho	S361: Phospho	AGLsPAEPLLSR	-0.01	-0.51	0.15	-0.24	0.3	0.51	0.34	-0.04	0.55	0.44	0.38	0.52
SLC38A1	Q9H2H9	1_Phospho	S52: Phospho	RsLTNSHLEK; sLTNSHLEK; sLTNSHLEKK	0.1	-0.71	0.31	-1.01	-0.64	-0.04	0.08	-1.12	-0.44	-1.16	-0.45	0.49
MAST2	Q6P0Q8	1_Phospho	S1381: Phospho	LHLsPPLGR	-0.78	-2.11	-1.81	0.47	-1.22	-0.17	2.31	3.48	3.04	3.48	1.97	-2.01
ZFC3H1	O60293	1_Phospho	S352: Phospho	RIsTSDILSEK	0.56	-0.2	0.56	0.47	0.17	0.6	0.37	0.4	0.17	0.38	0.25	0.63
CAMK2D	Q13557	1_Phospho	T287: Phospho	QEtVDCLK	0.29	0.63	0.74	0.55	0.43	-0.13	0.31	0.67	0.64	0.46	0.46	0.08
DDX3X	O00571-2	1_Phospho	S74: Phospho	SSFFSDRGsGSR	0.24	-0.08	0.23	0.28	0.39	0.12	0.07	-0.05	0.28	0.14	0.38	0.23
KIF21A	Q7Z4S6-4	1_Phospho	S1239: Phospho	KIPEPsPVTR	-0.61	-0.78	-0.09	-0.87	0.07	0.32	-0.58	-0.35	-0.33	-0.92	0.22	0.39
CLEC16A	Q2KHT3-3	1_Phospho	S67: Phospho	SAAVETASLsPSLVPAR	0.4	-0.17	0.44	-1.03	-0.08	-0.06	0.43	-0.08	-0.04	0.07	-0.08	0.09
MED14	O60244	2_Phospho	S1112: Phospho; S1119: Phospho	AGNWPGsPQVSGPsPAAR	0.13	0.05	0.01	0.24	-0.17	0.56	-0.15	0.05	0.06	0.09	-0.17	0.19
CDC42EP1	Q00587-2	2_Phospho	S195: Phospho	RSDSLLsFR; SDSLLsFR	-0.38	-0.09	-1.13	0.17	-0.72	0.47	-0.11	-1.51	-1.17	0.15	-0.87	-0.99
KIAA1462	Q9P266	1_Phospho	S770: Phospho	TSLsVDQAPTPK	0.45	0.37	0.24	-0.26	-0.28	-0.04	0.03	-0.08	0.8	0.98	-0.11	-0.1
PHLDB2	Q86SQ0-2	1_Phospho	T855: Phospho	EGLYLSDtLPR	0.42	0.2	0.73	0.69	0.31	0.23	-0.11	-0.2	0.45	0.75	0.22	0.08
ZNF362	Q5T0B9	1_Phospho	S404: Phospho	HTVVEHLVSHHsPQR	-0.71	-0.17	-2.07	0.11	-1.47	-0.24	-0.02	0.64	0.29	0.62	0.05	-0.46
NFIX	Q14938	1_Phospho	S265: Phospho	sITSPPSTSTTK	0.61	1.02	0.08	0.45	0.87	0.37	0.5	0.92	-0.08	0.45	0.67	0.21
DCBLD2	Q96PD2	1_Phospho	S598: Phospho	YsSSEVNHLSPR; AVDHEETPVRYsSSEVNHLSPR	0.03	0.09	0.16	0.1	-0.29	-0.18	-0.11	-0.01	-0.38	-0.55	-0.39	0.01
NEK4	P51957	1_Phospho	S461: Phospho	DQSLALsPK	0.22	-0.23	0.39	0.38	0.16	0.04	-0.02	-0.74	-0.1	0.05	-0.3	0.09
NDRG1	Q92597-2	1_Phospho	T262: Phospho	SRtASGSSVTSLDGTR	1.74	1.43	1.26	2.37	3.04	-2.53	0.79	0.95	1.76	1.48	2.07	-1.61
PCF11	O94913	1_Phospho	S777: Phospho	MIFEGPNKLsPR	0.46	0.28	0.12	0.09	0.37	0.05	0.52	0.08	0	0.2	0.28	0.13
PEAK1	Q9H792	1_Phospho	S730: Phospho	SYSSSHSsPAK	0.51	-0.11	0.16	-0.07	-0.12	0.14	0.57	0.11	0.39	0.3	0.46	0.03
MAP4K5	Q9Y4K4	1_Phospho	S433: Phospho	RQsSPSCGPVAETSSIGNGDGISK	-0.03	-0.46	-0.6	-0.09	-0.13	0.07	0.31	0.17	0.17	0.33	0.05	-0.36
CDCA3	Q99618	1_Phospho	S87: Phospho	TSSGDPPsPLVK	-0.01	-0.15	-0.08	-0.34	0.19	0.75	-0.05	0.08	0.12	-0.09	0.2	0.48
DDX46	Q7L014	1_Phospho	S804: Phospho	AALGLQDsDDEDAAVDIDEQIESMFNSK	-0.69	0.97	0.56	0.87	-0.14	-0.63	-0.05	-0.03	-0.05	0.08	-0.03	0.32
CTTN	Q14247	2_Phospho	S405: Phospho	AKTQTPPVsPAPQPTEER; TQTPPVsPAPQPTEER	-0.22	-0.33	-1.31	0.01	0.24	-0.01	0.03	-0.11	-0.17	0.1	-0.02	-0.15
PCM1	Q15154	2_Phospho	S65: Phospho	VTNDIsPESSPGVGR	0.05	-0.04	0.26	0.26	0.41	0.21	0.78	-0.26	0.15	-0.1	0.17	0.07
TACC3	Q9Y6A5	1_Phospho	S434: Phospho	SGCSEAQPPEsPETR	-0.01	0.11	0.3	0.34	-0.12	0.82	-0.24	-0.57	-0.46	-0.45	-0.57	0.6
FASN	P49327	1_Phospho	S725: Phospho	WLSTSIPEAQWHSsLAR	0.36	0.12	-0.32	-0.43	-0.11	-0.12	0.56	0.58	0.13	0.59	0.54	-0.46
CHD8	Q9HCK8-2	1_Phospho	S1699: Phospho	MNYMQNHQAGAPAPSLsR	-0.01	-0.45	-0.1	-0.31	-0.18	0.09	0.29	-0.06	0.36	-0.04	-0.11	-0.08
AKAP17A	Q02040	1_Phospho	S537: Phospho	VVPEDGsPEKR	-0.15	0.07	0.06	0.32	-0.08	0.12	-0.11	-0.02	-0.4	0.08	0.08	0.15
TRIP12	Q14669-4	1_Phospho	S721: Phospho	DDSLDLsPQGR	0.31	0.13	-0.38	0.02	0.29	0.68	-0.08	-0.37	-0.08	-0.39	0.09	0.22
NPM1	P06748-2	1_Phospho	T75: Phospho	DELHIVEAEAMNYEGSPIKVtLATLK; TVSLGAGAKDELHIVEAEAMNYEGSPIKVtLATLK	-0.27	-0.45	0.23	-0.23	-0.9	0.13	-0.15	-0.06	-0.31	0.07	-0.53	0.78
PXN	P49023	1_Phospho	S126: Phospho	sAEPSPTVMSTSLGSNLSELDR; QKsAEPSPTVMSTSLGSNLSELDR	-0.78	-0.53	0.98	0.23	-0.28	2.31	0.02	-0.42	0.01	-0.63	-0.02	-0.42
WHSC1L1	Q9BZ95-3	1_Phospho	S150: Phospho	KTGsPEIK	0.03	-0.57	-0.17	-0.51	-0.85	0.09	0.31	-0.06	0.04	0.13	0.06	0.35
MAP4K4	O95819-2	1_Phospho	T806: Phospho	EGtLIVR	0.58	-0.41	-0.11	0.21	0.89	-0.2	0.52	-0.44	0.54	0.14	0.84	-0.45
WDR62	O43379-4	1_Phospho	S32: Phospho	RGQsSPPPAPPICLR; GQsSPPPAPPICLR	0.08	0.23	0.09	0.14	0.49	-0.2	0.54	-0.01	0.67	0.45	0.31	-0.31
CTNND1	O60716-21	1_Phospho	T799: Phospho	SLDNNYStPNER	-0.14	-0.17	-0.28	-0.18	-0.26	0.66	-0.32	-0.05	-0.1	-0.23	-0.36	0.51
GOLGA4	Q13439	1_Phospho	S71: Phospho	VPsVESLFR; sVESLFR	0.17	0.22	0.06	-0.29	0.18	0.01	0.33	0.17	-0.25	-0.29	0.22	0.36
RBM4B	Q9BQ04	1_Phospho	S86: Phospho	LHVGNIsPTCTNQELR	0.22	-2.07	-0.76	0.29	-0.11	0.02	1.2	1.45	1.49	1.6	1.17	-0.76
NCOR2	Q9Y618-5	1_Phospho	S1314: Phospho	AIsSASIEGLMGR	-0.33	0.25	-0.3	-0.56	-0.83	-1.65	-1.06	0.3	-0.62	-0.09	-1.34	-0.75
RRBP1	Q9P2E9	1_Phospho	S615: Phospho	NTDVAQsPEAPK; NTDVAQsPEAPKQEAPAK	-0.05	-0.5	-0.98	-0.42	-0.31	0.09	0.26	0.04	-0.33	0.18	0.15	-0.18
HDGFRP2	Q7Z4V5	1_Phospho	S137: Phospho	GVMAVTAVTATAAsDR	0.04	-0.4	0.15	0.38	-0.38	-0.17	0.84	0.22	0.28	0.31	0.12	0.32
AHNAK	Q09666	1_Phospho	S5552: Phospho	GPAFNMAsPESDFGINLKGPK; GPAFNMAsPESDFGINLK	0.53	0.07	0.55	0.18	0.05	0.61	-0.48	-0.14	-0.03	-0.17	0.18	1.01
PKN2	Q16513-2	1_Phospho	S567: Phospho	ASsLGEIDESSELR	0	0.23	-0.07	0.29	0.36	-0.13	0.3	0.22	0.13	0.13	0.32	-0.04
PSMA5	P28066	1_Phospho	S56: Phospho	ITsPLMEPSSIEK	-0.06	0.09	0.36	-0.46	0.59	0.57	-0.64	-0.22	-0.01	-0.07	0.22	-0.37
DOCK7	Q96N67	2_Phospho	S1438: Phospho	SPSGSAFGsQENLR	0.08	0.1	0.07	0.37	0.39	0.02	0.33	-0.15	0.66	0.38	0.25	0.11
MAP7D1	Q3KQU3	1_Phospho	S410: Phospho	RPEAsPVQK; RPEAsPVQKK	-0.27	1.08	-0.01	-0.18	0.04	0.25	-0.17	0.08	-0.24	0	0.31	1.5
RAF1	P04049-2	1_Phospho	S662: Phospho	AAHTEDINACTLTTsPRLPVF; AAHTEDINACTLTTsPR	-0.39	-0.78	-0.66	-0.52	-0.71	0	1.1	1.12	1.3	1.17	1.05	-0.82
C9orf78	Q9NZ63	1_Phospho	S261: Phospho	VGDTEKPEPERsPPNR	0.18	0.12	-0.41	0.35	0.08	0.13	0.2	0.24	0.18	0.32	0.26	-0.5
IRF2BPL	Q9H1B7	1_Phospho	S662: Phospho	NSSSPVsPASVPGQR	-0.37	-0.93	-0.17	-0.19	-0.23	0.12	-0.01	-0.07	0.03	0.48	0.57	0.01
PHC3	Q8NDX5-2	2_Phospho	T590: Phospho	MDRtPPPPTLSPAAITVGR	-1.22	-0.34	-0.65	-0.59	0.19	0.31	0.5	0.56	0.27	-0.3	-0.85	0.11
KRT18	P05783	1_Phospho	S7: Phospho	SFTTRsTFSTNYR; sTFSTNYR	-0.14	0.1	0.26	-0.51	0.5	0.1	-0.07	-0.03	0.27	-0.32	0.45	0.49
RBM14	Q96PK6	1_Phospho	S623: Phospho	LSESQLsFR	1.48	0.08	0.49	0.54	1.13	-0.3	1.1	0.62	0.57	0.68	1.05	0
INCENP	Q9NQS7	1_Phospho	S899: Phospho	TSSAVWNsPPLQGAR	-0.07	0.33	-0.44	-0.02	-0.15	-0.36	-0.21	-0.04	0.05	0.38	-0.06	0.81
TJP2	Q9UDY2-5	1_Phospho	S170: Phospho	SRsWEDSPER	-0.73	-0.21	-0.69	-0.43	-0.46	0.57	-0.66	-0.59	-0.36	-0.49	-0.34	-0.31
ENO1	P06733	1_Phospho	S272: Phospho	YIsPDQLADLYK	0.18	0.29	0.59	0.58	0.18	0.01	-0.01	0.5	0.6	0.82	0.46	-0.04
ZSWIM8	A7E2V4-4	1_Phospho	S567: Phospho	RLsAEGGDK	0.35	0.24	0.36	0.08	0.08	-0.28	0.57	0.35	0.21	0.44	0.28	0
CDK13	Q14004-2	2_Phospho	S315: Phospho; S317: Phospho	sLsPLGGR	-0.6	0.28	-0.36	0.01	0.03	0.44	-0.05	-1.01	-1.05	-0.15	0.06	0.1
PTPN14	Q15678	1_Phospho	S578: Phospho	PATsTPDLASHR; NYLFRPPPPYPRPRPATsTPDLASHR; PRPATsTPDLASHR	-0.2	0.71	-0.25	0.09	-0.37	-0.24	-0.07	0.43	0.09	0.05	-0.17	-0.08
AP2M1	Q96CW1	1_Phospho	T156: Phospho	EEQSQITSQVtGQIGWR; SQHQTKEEQSQITSQVtGQIGWR; EEQSQITSQVtGQIGWRR	0.23	0.44	0.39	0.44	0.49	0.04	0.1	0.42	0.49	0.55	0.67	-0.1
TNS1	Q9HBL0	1_Phospho	T1328: Phospho	HVAYGGYStPEDR	-0.07	0.52	-0.04	0.16	0.08	0.16	-0.48	0.1	0.16	-0.47	0.08	-0.29
SRSF9	Q13242	2_Phospho	S204: Phospho; S211: Phospho	GRDsPYQSRGsPHYFSPFRPY	-0.05	0.09	0.46	0.51	0.11	-0.11	0.15	-0.1	0.11	0.07	0.16	-0.25
ZDHHC5	Q9C0B5	1_Phospho	S425: Phospho	SFHFDPLSSGsR	0.28	-0.54	-0.68	0.08	0.42	0.02	0.76	0.93	0.84	0.87	0.91	-1.25
CDK13	Q14004-2	2_Phospho	S437: Phospho; S439: Phospho	HSsIsPSTLTLK	-0.19	-0.21	-0.45	-0.25	-0.11	0.5	0.01	0.48	0.07	0.41	0.39	-0.3
AHNAK	Q09666	1_Phospho	S177: Phospho	DIDISsPEFK; EGAKDIDISsPEFK	-0.06	-0.18	0.32	0.05	0.2	0.01	-0.13	0	0.34	-0.08	0.24	0.35
TRAFD1	O14545	1_Phospho	S327: Phospho	ALPSLNTGSSsPR; ALPSLNtGSSsPR	-0.04	0.2	0.03	-0.58	0.04	0.19	-0.04	0.2	-0.16	-0.6	-0.3	0.09
ARHGEF2	Q92974-3	1_Phospho	S147: Phospho	ILSQsTDSLNMR	1.16	0.23	0.52	0.41	0.17	0.32	0.82	0.19	0.63	0.2	-0.09	0.26
ZMYND8	Q9ULU4	1_Phospho		TGQAGSLSGSPKPFSPQLSAPITTK; TPPSTTVGSHSPPETPVLTR	0.24	0.41	0.18	0.52	-0.17	0.08	0.56	-0.21	0.25	0.65	0.3	0.03
ACIN1	Q9UKV3	1_Phospho	S825: Phospho	KIsVVSATK	0.13	-0.22	-0.36	0.06	-1	-0.54	0.11	0.65	0.1	0.35	-0.44	-0.35
REPS1	Q96D71-3	1_Phospho	S272: Phospho	RQsSSYDDPWK	0.26	0.01	0.04	0.42	0.37	-0.11	0.71	0.96	0.39	0.72	0.46	0.17
C1orf226	A1L170-2	1_Phospho	S266: Phospho	ASsPSLIER	0.59	-0.26	-0.06	-0.54	1.01	-0.58	0.74	-0.14	0.51	-0.53	1.22	-0.58
SRGAP1	Q7Z6B7	1_Phospho	S835: Phospho	DMNsPTDRHPDGYLAR	0.49	0.32	0.29	0.35	0.24	0.02	0.27	0.02	0.18	-0.19	-0.2	-0.03
SNTB2	Q13425	1_Phospho		SPSLGSDLTFATR; LVHSGSGCRSPSLGSDLTFATR	-0.33	-0.49	-0.69	-0.14	0.21	0.45	0.05	0.2	-0.47	0.64	0.29	1.29
USP20	Q9Y2K6	1_Phospho	S373: Phospho	SSsPCRTPEPDNDAHLR	0.82	-0.1	0.46	0.49	0.34	0.94	1.05	-0.61	1.02	0.4	1.09	-1.05
AMPD2	Q01433	1_Phospho	S168: Phospho	QIsQDVK; QIsQDVKLEPDILLR; LERQIsQDVK	0.36	0.67	0.21	0.05	-0.33	0.07	-0.7	-0.9	-1.1	-1.03	-1.03	-0.41
NCKIPSD	Q9NZQ3-5	1_Phospho	T181: Phospho	AAPTtPPPPVKR; AAPTtPPPPVK	0.21	0.25	0.71	0.02	0.24	-0.25	-0.04	0.19	0.36	-0.08	0.06	0.07
SRSF8	Q9BRL6-2	1_Phospho	S26: Phospho	VDNLTYRTsPDSLRR; VDNLTYRTsPDSLR	-0.35	-0.51	-0.97	-0.45	-0.06	0.34	0.04	-0.42	0.08	0.31	0.27	-0.43
TBC1D4	O60343	1_Phospho	S566: Phospho	sLTSSLENIFSR	2.58	0.83	0.86	1.99	0.78	0.85	1.72	0.79	1.01	1.02	0.15	0.73
SNIP1	Q8TAD8	1_Phospho	S52: Phospho	RPDHSGGsPSPPTSEPAR	0.15	0.33	0.07	0.09	0.31	0.01	-0.08	-0.13	-0.19	-0.19	-0.12	0.23
ANLN	Q9NQW6-2	1_Phospho	S624: Phospho	AESGDsLGSEDRDLLYSIDAYR	0.68	0.24	0.46	0.54	0.32	0.51	0.57	0.22	0.42	0.42	0.53	0.2
STMN1	P16949	1_Phospho	S38: Phospho	SKESVPEFPLsPPKK; ESVPEFPLsPPKKK; SKESVPEFPLsPPKKK; ESVPEFPLsPPK; SKESVPEFPLsPPK	0.19	-0.14	0.41	0.27	0.2	0.11	-0.06	-0.44	0.06	0.12	-0.17	0.77
MAP1B	P46821	1_Phospho	S1389: Phospho	ASVSPMDEPVPDSEsPIEK; SSHLPTEVIEKPPAVPVSFEFSDAKDENERASVSPMDEPVPDSEsPIEK	-1.44	-0.83	0.37	-0.36	-0.25	-0.21	-1.23	-0.23	0.12	-0.04	0.29	-0.23
MAVS	Q7Z434	1_Phospho		GPVSPSVSFQPLAR	0.35	0.58	0.37	-0.49	0.19	-0.53	-0.01	-0.08	-0.84	-0.41	0.09	0.89
DLC1	Q96QB1-1	1_Phospho	S80: Phospho	LEIsPHR	-1.09	-0.3	-0.02	-0.04	-1.14	0.88	-1.71	-0.28	-0.23	-0.18	-1.15	1.31
NMT2	O60551	1_Phospho	S38: Phospho	GsPGGYLGAK	0.37	0.31	0.68	0	0.15	0.26	-0.23	0.29	0.37	0.63	-0.22	0.84
SIPA1L1	O43166-2	2_Phospho	S1412: Phospho; S1418: Phospho	HSAsPVVFTsAR	-0.22	-0.03	-0.59	-0.55	0.03	-0.06	0.13	-0.79	-0.26	-0.56	0.27	-0.62
TNS1	Q9HBL0	1_Phospho	S338: Phospho	WDsYDNFSGHR	-0.88	-0.31	-1	-0.21	0.1	-0.03	-0.26	-0.09	-0.1	-0.32	-0.08	-0.5
PFKFB3	Q16875-2	1_Phospho	S461: Phospho	RNsVTPLASPEPTKKPR; RNsVTPLASPEPTK	0.72	0.85	-0.15	0.27	0.6	0.04	0.45	0.7	0.51	0.67	0.67	-0.09
PKN2	Q16513-2	1_Phospho		AIPTVNHSGTFSPQAPVPTTVPVVDVR; SLPFSENVSAVQK; ASSLGEIDESSELR	0.07	0.12	0.39	0.75	0.52	0.05	0.13	-0.38	0.09	0.04	-0.19	0.38
USP24	Q9UPU5	1_Phospho	S2047: Phospho	VSDQNsPVLPK; VSDQNsPVLPKK	-0.25	0.08	-1.2	0.25	-0.15	-0.01	0.01	0.5	0.29	0.32	-0.02	-1.08
SRRM2	Q9UQ35-2	1_Phospho	S954: Phospho	SVsPCSNVESR	-0.21	0.24	1.05	0.37	-0.55	0.23	-0.24	0.38	0.17	0.36	-0.41	0.28
SMTN	P53814-5	1_Phospho	S277: Phospho	ETPAAQsPTRGPSDTK; ETPAAQsPTRGPSDTKR	0.61	-0.11	0.34	0.13	0.68	0.78	0.43	-0.22	0.67	0.27	0.85	0.57
CCNY	Q8ND76-3	1_Phospho	S19: Phospho	ASTIFLSKsQTDVR	0.58	0.71	0.87	1.02	-0.29	-0.02	0.55	0.66	0.12	0.6	-0.28	-0.11
MTX1	Q13505	1_Phospho	S87: Phospho	RPPsPEAR; RPPsPEARGPVPR	-0.24	0.06	0.08	0.07	-1.04	-0.02	0.66	0.44	-0.12	0.34	0.47	-0.17
ARHGAP11A	Q6P4F7	1_Phospho	S675: Phospho	DFsPLQTQTFNR	0.17	-0.07	0.04	0.7	0.33	0.1	0.04	-0.04	-0.53	-0.7	-0.16	-0.19
FRMD6	Q96NE9-3	1_Phospho	S167: Phospho	GQSTDsLPQTICR; LRGQSTDsLPQTICR	0.11	0.05	0.48	0.34	0.06	0.27	-0.2	0.2	0.34	-0.17	0	0.1
THOC1	Q96FV9	1_Phospho		SPTPPLFSLPEAR	0.41	-0.1	-0.15	-0.22	0.61	0.33	0.19	-0.27	0.03	0.28	-0.16	0.67
DOCK7	Q96N67	1_Phospho	S888: Phospho	SAVRPAsLNLNR	0.33	0.26	0.2	0.08	0.08	0.01	-0.06	0.05	0.1	-0.06	0	0.13
RAI14	Q9P0K7-3	1_Phospho	S29: Phospho	VAsLLGK	-0.12	0.59	-0.84	0.46	0.47	-1.37	-2.07	-2.44	-3.35	-1.81	-1.79	-0.41
PEAK1	Q9H792	1_Phospho	S572: Phospho	SAPTsPTATNISSK	0.41	0.36	0.27	0.44	0.11	-0.41	0.61	-0.23	-0.07	-0.02	-0.01	0.15
CDC42BPA	Q5VT25-4	1_Phospho	S1504: Phospho	RYsFRVPEEER	0.48	0.06	-0.12	0.25	0.22	-0.13	0.73	0.44	0.36	0.5	0.35	0.09
DBN1	Q16643-2	1_Phospho		MAPTPIPTRSPSDSSTASTPVAEQIER; VASASAGSCDVPSPFNHRPGSHLDSHRR	-0.27	-0.39	-0.69	0.03	0.04	-0.35	-0.63	-0.29	-1.29	-0.1	-0.81	-0.2
TMPO	P42167-2	1_Phospho	S190: Phospho	QNGSNDSDRYSDNEEDsKIELK; QNGSNDSDRYSDNEEDsK	0.27	0.26	-0.17	0.21	0.01	0.29	0.29	-0.53	0.04	0.2	0.12	-0.42
MAP7D1	Q3KQU3	1_Phospho	S399: Phospho	RKPNAGGsPAPVR; KPNAGGsPAPVR	1.02	0.17	1.28	0.38	1.7	1.19	0.44	-0.12	0.35	-0.49	0.74	0.34
LRRFIP1	Q32MZ4	1_Phospho		RGSGDTSISIDTEASIR; NMPGLSAATLASLGGTSSR; GSGDTSISIDTEASIR; IDGATQSSPAEPK; ALDSNSLENDDLSAPGREPGHFNPESR	-0.39	-0.37	-0.36	-0.56	0.17	0.32	0.53	0.32	0.35	0.2	0.52	-0.43
CTTNBP2NL	Q9P2B4	2_Phospho	S557: Phospho	VSsPLSPLSPGIKSPTIPR	0.22	0.13	-0.28	-1.56	0.42	0.17	-0.78	-0.34	-0.09	-0.17	0.08	-0.88
KRT19	P08727	1_Phospho	S13: Phospho	QSSATsSFGGLGGGSVR	0.19	0.55	0.92	0.28	-0.06	0.74	-0.38	-0.44	-0.18	-0.44	-0.4	-0.07
PARD6A	Q9NPB6-2	1_Phospho	S344: Phospho	IRGDGSGFsL	-0.68	0.09	-0.53	-0.67	-0.37	0.29	-0.35	0.29	-0.02	-0.21	-0.22	-0.13
HNRNPA2B1	P22626-2	No Phospho		IDTIEIITDR; KLFVGGIKEDTEEHHLR; LTDCVVMRDPASKR	0.37	0.62	-0.45	0.49	0.01	0.22	0	0.04	-0.1	-0.04	0.1	0.06
TMF1	P82094	1_Phospho	S333: Phospho	IDSFSVQsLDSR	0.35	0.1	0.06	-0.32	-0.19	-0.08	0.52	0.52	0.44	0.48	-0.01	-0.32
CLASP1	Q7Z460-3	1_Phospho	T711: Phospho	GPPVtPSSEKR	-0.54	-0.43	0.07	-0.01	0.44	0.12	-0.19	-0.33	0.07	-0.22	0.24	0.14
RBM12B	Q8IXT5	2_Phospho	S278: Phospho; S280: Phospho	sRsPLGFYVHLK	-0.42	-0.34	-1.15	-0.1	-0.01	0.22	0.13	-0.6	-0.18	0.35	0.12	-0.95
KIAA0930	Q6ICG6-3	1_Phospho	S328: Phospho	SLVGsWLK	0.17	0.47	-0.09	0.27	0.01	0.07	-0.06	0.58	-0.45	0.32	0.12	0.66
SH3BP1	Q9Y3L3	1_Phospho	S544: Phospho	TESEVPPRPAsPK	0.17	0.26	0.03	0.3	-0.27	-0.18	0.14	0.29	-0.11	0.16	-0.36	0.01
PCYT1A	P49585	1_Phospho	S362: Phospho	AAAYDIsEDEED; HKAAAYDIsEDEED	0.04	0.25	0.15	-0.21	0.18	0.23	0.59	-0.46	0.6	-0.34	0.4	-0.78
SRRM2	Q9UQ35-2	1_Phospho	S1329: Phospho	ENSFGsPLEFR; ELSNSPLRENSFGsPLEFR	-0.3	0.12	-0.02	-0.11	-0.2	-0.12	-0.14	0.1	-0.45	0.01	-0.37	0.52
SRSF10	O75494	2_Phospho	S131: Phospho; S133: Phospho	sRsFDYNYRR; sRsFDYNYR	-0.18	0.1	-0.55	0.21	0.04	0.77	0.12	-1.2	0.02	-0.01	0.14	-0.4
ABCB1	P08183	1_Phospho	S661: Phospho	LVTMQTAGNEVELENAADESKSEIDALEMSSNDSRSsLIR; SEIDALEMSSNDSRSsLIR	-0.07	-0.08	0.85	1.15	-0.76	1.06	-0.54	-0.46	-0.02	0.79	-1.48	0.99
SPECC1	Q5M775-4	1_Phospho	S344: Phospho	TILETsFHQHR	-0.01	0	0.24	0.08	0.22	-0.07	-0.09	-0.22	0.04	0.05	-0.38	0.17
SETD1B	Q9UPS6	1_Phospho	S1255: Phospho	EVEARPPLsPER	-0.36	0.57	-0.17	-0.59	-0.04	-0.38	-0.22	0.06	-1.52	-0.43	-0.54	0.64
MAP3K1	Q13233	1_Phospho	S21: Phospho	ATsPEAGGGGGALK	0.47	0.33	-0.04	0.36	0.18	-0.1	-0.22	-0.08	0.1	-0.16	0.04	-0.15
KIF13A	Q9H1H9-3	1_Phospho	S636: Phospho	QQLsPDRQPQSSGPDR	-0.29	0.11	0.43	0.59	-1.23	0.55	-0.3	-0.64	0.21	-0.12	-1	0.43
ARHGAP29	Q52LW3-2	1_Phospho	S21: Phospho	AWASGQLsTDITTSEMGLK	0.04	0.6	1.05	0.45	0.41	-0.07	0.35	0.26	0.41	0.05	0.25	0.42
AHDC1	Q5TGY3	1_Phospho	S1476: Phospho	GTAYWYPPGSAARsPPYEGK; sPPYEGK	-0.48	0.32	-0.18	-0.2	-0.53	-0.15	-0.34	-0.23	0.03	0.12	0.17	-0.3
BNC2	Q6ZN30-2	1_Phospho	S403: Phospho	TEPACVsPIQNSAPVSDLTK	1.38	1.56	1.42	1.43	1.15	-0.87	0.11	0.34	0.11	0.43	-0.05	-0.06
CENPC1	Q03188	1_Phospho		ILATDVSSKNTPDSKK; TSVSQNVIPSSAQK	0.25	0.14	-0.01	0.01	0.46	-0.14	0.21	0.25	0.44	0.27	0.28	0.17
PEAK1	Q9H792	1_Phospho	S861: Phospho	LVTsPQSEPPAPFPPPR	-0.26	-0.37	-0.78	-0.83	-0.04	0.74	-0.72	-0.28	-0.75	0.1	-0.31	0.23
RNF31	Q96EP0	1_Phospho	S466: Phospho	RLsAPLPSSCGDPEK; RLsAPLPSSCGDPEKQR	0.24	-0.15	0.27	0.28	-0.49	-0.37	0.27	0.26	-0.19	0.28	-0.34	-0.31
RUNX1T1	Q06455-3	No Phospho		AFTSDK	0.22	-0.26	-0.83	0.23	0.09	0.56	0.32	0.31	0.71	0.62	0.41	-0.59
CBX6	O95503	1_Phospho	S301: Phospho	LLPETVsPSAPSWR	0.13	1.06	-0.06	0.38	-0.26	1.2	-0.01	-0.29	-0.77	-0.34	-0.62	0.66
TMEM169	Q96HH4	1_Phospho	S51: Phospho	ESRPEsIIIYR; KESRPEsIIIYR	0.87	0.24	1.06	-0.05	0.64	-0.24	0.66	-0.3	0.24	-0.59	0.19	0.13
KRI1	Q8N9T8-2	1_Phospho	S139: Phospho	AGKYVDEENsDGETSNHR; YVDEENsDGETSNHR	-0.08	0.23	0	-0.07	0.17	0.31	0.04	0.03	0	0.04	0.01	-0.22
DBN1	Q16643-2	1_Phospho	S314: Phospho	VASASAGSCDVPsPFNHRPGSHLDSHR; VASASAGSCDVPsPFNHRPGSHLDSHRR	0	-0.47	-0.01	0.11	0.78	1.41	0.08	0.28	-0.45	-0.13	-0.16	0.68
DNMT1	P26358-2	1_Phospho	T181: Phospho	QtTITSHFAK	1.61	0.12	0.82	0.83	0.89	-0.24	0.6	0.63	0.36	0.76	0.49	0.35
HAUS6	Q7Z4H7	1_Phospho	T584: Phospho	NQIPRtPENLITEIR; tPENLITEIR	-0.15	-0.18	-0.2	-0.74	-0.06	0.32	-0.48	-0.28	-1.32	-0.73	-0.41	0.73
SIPA1L1	O43166-2	1_Phospho	S162: Phospho	FLMPEAYPSsPR	0.27	0.52	0.53	0.03	0.54	0.11	-0.33	-0.4	0.14	-0.5	0.44	0.37
MKI67	P46013-2	1_Phospho	S2681: Phospho	GKsSEPVVIMK	0.35	-0.99	0.03	-0.07	-0.42	0.38	0.14	0.11	0.26	0.14	0.18	0.99
ELMSAN1	Q6PJG2	1_Phospho	S461: Phospho	RAsQEANLLTLAQK; AsQEANLLTLAQK	0.35	0.77	0.44	1.11	-0.02	0.55	0.1	0.45	0.03	0.51	-0.04	0.21
PLEKHM3	Q6ZWE6-2	1_Phospho	S152: Phospho	SRsDITQVDWR	0.65	0.62	0.17	0.7	0.82	-0.69	0.27	0.26	0.17	0.17	0.31	-0.48
PPP1R12A	O14974-5	1_Phospho	S358: Phospho	TGsYGALAEITASKEGQK; KTGsYGALAEITASK; TGsYGALAEITASK; TGsyGALAEITASK; KTGsYGALAEITASKEGQK; TGsYGALAEITASKEGQKEK	-0.27	-0.32	-1.28	0.03	-0.29	-0.55	0.15	0.39	0.49	0.44	0.16	-0.47
LRRFIP2	Q9Y608-4	1_Phospho	S88: Phospho	NSASATTPLsGNSSR	0.14	0.27	0.11	-0.61	-0.01	-0.08	0.06	0.05	0.02	0.24	0.35	-0.25
TOM1	O60784-4	1_Phospho		LPNLSSPSAEGPPGPPSGPAPR; AADRLPNLSSPSAEGPPGPPSGPAPR	-0.36	-0.65	-0.52	-1.48	-0.93	0.87	-0.51	-0.02	-0.44	-0.49	0	-0.02
HP1BP3	Q5SSJ5-5	1_Phospho	T51: Phospho	TVNSTREtPPKSK; TVNSTREtPPK	0.29	-0.4	0.14	0.09	-0.13	-0.05	0.34	0.48	-0.13	0.42	-0.12	0.01
SIPA1L1	O43166-2	1_Phospho	S255: Phospho	GsGFSLDVIDGPISQR; LSDFLITGGGKGsGFSLDVIDGPISQR	0.21	0	1.64	-0.23	0.53	-0.88	0.59	0.74	0.64	0.4	0.8	-0.44
SRRM2	Q9UQ35	1_Phospho	S2102: Phospho	NHSGsRTPPVALNSSR	0.31	0.33	-0.23	0.52	0.33	0.54	3.48	2.78	3.48	3.04	2.58	-2.35
DCBLD2	Q96PD2	1_Phospho	T717: Phospho	ATGNQPPPLVGTYNtLLSR	-0.23	-0.21	0.4	-0.01	0.98	0.22	1.05	0.67	1.36	0.89	1.3	-0.2
BCL9	O00512	1_Phospho	T315: Phospho	AVtPVSQGSNSSSADPK	0.21	0.03	0.33	-0.08	-0.25	0.34	0.33	0.25	0.16	0.28	-0.09	-0.18
CYLD	Q9NQC7-2	1_Phospho	S62: Phospho	IPsAK	0.08	0.24	0.43	-0.04	0.45	0.04	-0.06	0.44	0.32	0.46	0.85	0.62
RBM10	P98175-2	1_Phospho	S89: Phospho	HsPTGPPGFPR; HRHsPTGPPGFPR	0.17	0.25	0.12	0.04	-0.05	0.05	0.4	0.42	0.67	0.55	0.42	-0.31
ATG4B	Q9Y4P1-4	1_Phospho	S321: Phospho	FFDsEDEDFEILSL	-0.05	-0.81	-1.83	0.03	-0.33	0.27	0.46	0.76	0.75	0.92	0.69	-2.07
FLNA	P21333-2	1_Phospho	S1630: Phospho	YGGDEIPFsPYR	-1.08	-1.03	-0.26	-0.67	-0.81	0.14	-1.39	-1.24	-1.02	-1.67	-0.88	0.36
RASA1	P20936-2	1_Phospho	T285: Phospho	EIYNtIR	0.65	-0.12	0.51	0.18	0.87	-0.03	0.15	0.19	0.33	0.2	0.47	0.26
MYBBP1A	Q9BQG0-2	1_Phospho	S1163: Phospho	EIPSATQsPISK; EIPSATQsPISKK; EIPSAtQsPISK	-0.08	-0.29	0.23	0.2	-0.12	0.47	-0.23	-0.23	-0.02	-0.01	-0.17	0.47
SNW1	Q13573	1_Phospho	S224: Phospho	GPPsPPAPVMHSPSR	0.17	0.33	0.11	0.06	0.05	0.36	0.01	-0.11	-0.15	-0.09	-0.31	0.31
NUP214	P35658-2	1_Phospho	S655: Phospho	SAQGSSSPVPSMVQKsPR	0.11	0.08	0.21	0.42	-0.09	0.2	-0.23	-0.66	-0.65	-0.42	-0.22	-0.02
SRRM1	Q8IYB3-2	2_Phospho	S711: Phospho; S713: Phospho	QsPsPSTRPIR; RQsPsPSTRPIR	-0.16	0.17	-0.09	0	-0.22	0.85	-0.15	-1.11	-0.58	-0.09	-0.45	0.04
PROSER2	Q86WR7-2	1_Phospho	S179: Phospho	APsPPVEHPR	-0.06	0.01	0.37	-0.3	0.27	0.32	-0.38	-0.38	-0.02	-0.84	0.04	0.73
TNRC6A	Q8NDV7-6	1_Phospho	S739: Phospho	QNTAWDTETsPR; VLSNSGWGQTPIKQNTAWDTETsPR; QNTAWDTETsPRGER	0	-1.33	-0.33	-0.22	0.09	-0.16	-0.46	-0.7	-0.83	-0.77	-0.17	0.02
SRRM2	Q9UQ35-2	2_Phospho	S1329: Phospho	ELSNSPLRENSFGsPLEFR	-0.09	0.25	-0.03	0.22	-0.17	0.61	0.06	-0.03	-0.01	0.06	-0.19	0.22
BCLAF1	Q9NYF8	1_Phospho	S222: Phospho	SSATSGDIWPGLSAYDNsPR	-0.09	0.33	-0.14	-0.04	-0.1	-0.2	-0.11	-0.12	0.15	0.25	-0.03	0.22
AZI1	Q9UPN4	No Phospho		THHRGR	0.21	-0.17	-0.96	0.31	0.31	-0.23	0.85	1.15	1.01	0.95	0.83	-3.35
TJP1	Q07157-2	1_Phospho	S912: Phospho	IDsPGFKPASQQVYR; IDsPGFKPASQQVYRK	-0.7	-0.36	-0.54	-0.07	-0.34	0.57	-0.71	-0.49	-0.15	-0.37	-0.21	-0.05
SVIL	O95425-2	2_Phospho	S261: Phospho; S270: Phospho	sPSFGDPQLsPEARPR	-0.5	-0.3	-0.27	-1.29	-0.29	-0.08	-1.4	-1.75	-2.14	-1.27	-1.05	0.27
MKI67	P46013-2	1_Phospho	S1577: Phospho	LDLLGNLPGsKR; LDLLGNLPGsK	-0.13	-0.12	-0.24	0.08	-0.21	0.66	-0.04	0.17	-0.2	-0.24	-0.34	0.26
SLC14A1	Q13336-2	1_Phospho	S5: Phospho	sLIGGAGDAR; MNGRsLIGGAGDAR	0.79	0.31	1.07	0.63	0.44	-1.81	0.58	0.34	0.27	0.16	0.04	-0.33
SLAIN2	Q9P270	1_Phospho	S63: Phospho	AGASIPSSGAAsPR	0.62	0.08	0.42	-0.44	0.55	0.49	0.11	0.08	-0.08	-0.16	0.42	2.07
KAZN	Q674X7-4	1_Phospho	S245: Phospho	SSTPSDINsPR	-0.05	0.1	-0.27	0.3	0.08	-0.14	0.25	0.1	0.15	0.26	0.16	-0.33
PSMD4	P55036	1_Phospho	S266: Phospho	MTIsQQEFGR	0.1	0.21	0.53	0.24	0.2	0.1	-0.12	0.11	-0.05	-0.21	-0.46	0.04
PTPN13	Q12923-3	1_Phospho	S938: Phospho	RLSCsELSLYQPLQNSSK; LSCsELSLYQPLQNSSK	-0.13	0.35	0.24	0.08	-1.53	-0.84	-0.63	0.36	-0.17	-0.01	-1.47	-0.16
RPL18A	Q02543	1_Phospho	S123: Phospho	AHsIQIMK	0.25	-1.18	-0.5	0.09	0.08	-0.1	2.13	2.1	1.9	1.85	1.61	-1.4
VDAC2	P45880	1_Phospho	S115: Phospho	LTFDTTFsPNTGK; LTFDTTFsPNTGKK; LTFDTTFsPN	-0.01	0.41	0.24	-0.21	0.55	0.34	-0.14	0.2	0.09	0.06	0.58	0.58
FAM20C	Q8IXL6	1_Phospho	S188: Phospho	VAVPPLTEEDVLFNVNsDTR	0.66	0.38	-0.03	0.54	-0.36	-0.38	1.26	1.08	0.72	1.24	0.51	-0.5
R3HDM2	Q9Y2K5-2	1_Phospho		ASSFSGISILTR; SASTDLGTADVVLGR	0.22	0.65	-0.42	0.41	0.03	-0.25	0.99	0.63	1.27	0.75	0.3	0.1
DDX39B	Q13838-2	1_Phospho	T187: Phospho	NCPHIVVGtPGR	-0.31	0.13	-0.32	-0.66	-0.28	0.4	-0.58	-0.65	-0.4	-0.57	-0.47	0.3
MFAP1	P55081	1_Phospho	S94: Phospho	LQNRIsEDVEER; RLQNRIsEDVEER	-0.19	0.41	0.14	-0.21	0.14	0.27	0.25	-0.32	-0.4	0.2	-0.07	0.39
PACS1	Q6VY07	1_Phospho	S495: Phospho	TDLQGSAsPSKVEGVHTPR	0.39	-0.25	-0.02	0.71	-0.07	0.04	-0.39	-0.09	0.09	-0.14	-0.29	-0.57
RANBP2	P49792	1_Phospho	S3207: Phospho	IESFGsPK; KIESFGsPK	-0.13	0.34	0.11	0.04	0	0.39	0.06	0.44	0.08	0.13	0.33	0.44
OTUD5	Q96G74-3	1_Phospho	S64: Phospho	AsPPPQGPLPGPPGALHR	0.55	0.7	0.51	0.6	0.61	0.24	0.2	0.12	0.51	0.22	0.12	-0.05
C9orf142	Q9BUH6	1_Phospho	S152: Phospho	KsPRPAGPQLFLPDPDPQR	-0.59	-0.74	0.06	-0.07	0.15	-0.7	-0.25	-0.05	-0.41	-0.32	0.06	-0.14
RPA1	P27694	1_Phospho	S384: Phospho	VsDFGGR	0.55	0.15	-0.16	0.04	0.22	-0.17	0.6	0.25	0.45	0.02	0.21	-0.42
TLN1	Q9Y490	1_Phospho		RLLSDSLPPSTGTFQEAQSR; QAAASATQTIAAAQHAASTPK; LLSDSLPPSTGTFQEAQSR; GSQAQPDSPSAQLALIAASQSFLQPGGK; VVAPTISSPVCQEQLVEAGR; LNEAAAGLNQAATELVQASRGTPQDLAR	0.08	-0.05	-0.28	-0.15	0.19	0	-1.79	-0.92	-0.4	-0.59	-0.46	0.82
ARHGEF40	Q8TER5-3	1_Phospho	S262: Phospho	GSPTDAEGsPGLSR	-0.67	-0.34	-0.29	-0.56	0.27	-0.27	-0.65	-0.14	-0.7	-0.64	0.36	-0.09
NUCKS1	Q9H1E3	2_Phospho	S58: Phospho; S61: Phospho	SQEDsEDsEDKDVK; NSQEDsEDsEDKDVK; SGKNSQEDsEDsEDKDVK	-0.44	-0.03	0.12	0.49	-0.28	0.6	-0.17	-0.5	0.53	0.28	0.42	-0.24
CHAF1A	Q13111-3	1_Phospho	T259: Phospho	SLPAtPQGK	0.11	0.08	0.15	0.29	0.06	0.2	0.57	0.59	0.74	0.98	0.09	-0.15
RBM23	Q86U06	1_Phospho	S128: Phospho	VHYRsPPLATGYR	-0.11	-0.62	-0.96	0.06	0.15	-0.28	0.36	0.4	0.52	0.49	0.64	-0.48
TBC1D10B	Q4KMP7	1_Phospho	S132: Phospho	ALAAGADsPKTEEARPSPAPGPGTPTGTPTR; ALAAGADsPK	0.16	0	0.15	0.09	-0.17	-0.07	0.4	0.12	-0.01	0.27	-0.14	0.3
ARHGEF5	Q12774	1_Phospho		AEELSPAALSPSLEPIR; GASPPISAIEEFSIIPEAPMR; LESLSETPGPSSPR	-0.61	-0.71	-0.26	-0.48	-0.28	-0.23	-0.06	-0.8	-1.68	-0.74	-2.11	0.72
LRWD1	Q9UFC0	1_Phospho	S212: Phospho	ANsPEKPPEAGAAHKPR	-0.05	0.51	0.11	-0.31	0.19	0.1	0.2	0.03	-0.08	-0.17	0.16	0.06
PRRC2C	Q9Y520-5	1_Phospho	S1545: Phospho	SFSsQRPVDR	0.64	-0.3	-0.68	-0.06	0.4	-0.29	0.61	0.07	0.18	0.28	0.43	-0.5
METTL22	Q9BUU2	1_Phospho	S132: Phospho	AAsDSNPAGPLR	0.45	0.51	-0.12	0.32	0.12	-0.52	0.52	0.54	0.21	0.31	0.03	-0.21
FAM21A	Q641Q2-2	1_Phospho	S288: Phospho	SRPTsFADELAAR; PTsFADELAAR	0.06	0.1	0.18	-0.08	0.48	0.5	-0.1	-0.01	0.07	0	0.46	0.17
DTL	Q9NZJ0	1_Phospho		RLDSSCLESVK	0.61	0.21	0.65	0.1	0.9	0.61	0.47	0.03	0.6	0.08	0.62	1.23
GIT1	Q9Y2X7-3	1_Phospho	S419: Phospho	sMDSSDLSDGAVTLQEYLELK; sMDSSDLSDGAVTLQEYLELKK	-0.68	-0.54	-0.56	-1.32	-1.38	-2.44	-0.04	0.32	-0.08	0	-0.64	-0.24
DYNC1H1	Q14204	1_Phospho		TDSTSDGRPAWMR	-0.21	-0.3	-0.56	-0.18	0.05	0.24	-0.04	0.05	-0.58	-0.04	0.23	-0.62
MCM4	P33991	1_Phospho	S326: Phospho	IAEPsVCGR	0.33	0.47	0.46	0.19	0.02	-0.4	0.26	0.5	0.16	0.23	-0.04	0.12
GSK3B	P49841-2	1_Phospho	S215: Phospho	GEPNVsYICSR	-0.24	0.09	0.05	-0.01	-0.12	0.22	-0.44	0.36	0.01	0.1	-0.16	0.26
TMX1	Q9H3N1	1_Phospho	S270: Phospho	QRsLGPSLATDK; sLGPSLATDK; QRsLGPSLATDKS; sLGPSLATDKS; sLGPSLAtDKS	0.78	0.15	1.13	0.57	0.66	0.21	0.55	0.02	0.27	0.22	0.41	0.1
ARHGAP23	Q9P227-2	1_Phospho	S611: Phospho	RSsYLLAITTER	0.83	1.19	-0.06	1.05	0.51	0.1	0.46	-0.18	0.1	0.05	0.08	-0.46
RALGAPA1	Q6GYQ0-5	1_Phospho	S797: Phospho	SSsTSDILEPFTVER	-0.51	-1.67	-0.72	-0.71	-0.51	1.35	-0.26	-0.44	-0.25	-0.6	-0.17	-0.91
NFATC3	Q12968	1_Phospho	S1063: Phospho	QAPLPsPESLDLGR	-0.82	-0.51	0.14	-0.21	-0.15	0.42	0.02	-0.43	0.18	-0.24	-0.07	0.73
TNKS1BP1	Q9C0C2-2	1_Phospho	S123: Phospho	TEAQDLCRAsPEPPGPESSSR; AsPEPPGPESSSR	-0.18	0.18	0.03	-0.31	-0.19	-0.04	-0.08	-0.13	-0.01	-0.34	-0.33	-0.04
TP53BP1	Q12888-2	1_Phospho	S1683: Phospho	KLITSEEERsPAKR; KLITSEEERsPAK; LITSEEERsPAK; LITSEEERsPAKR	-0.09	-0.15	0.24	0.39	-0.37	-0.03	-0.14	-0.02	0.21	0.15	-0.17	0.2
ADAR	P55265-4	1_Phospho	S868: Phospho	TMLLLSRsPEAQPK	0.29	-0.01	0.07	0.15	0	0.18	0.12	-0.01	-0.27	-0.01	0	0.06
PPP1CB	P62140	1_Phospho	T316: Phospho	AKYQYGGLNSGRPVtPPR; YQYGGLNSGRPVtPPR; YQYGGLNSGRPVtPPRTANPPK	-0.26	0	-0.04	-0.4	-0.21	-0.12	-0.53	-0.32	-0.38	-0.38	-0.37	0.47
NOTCH2	Q04721	1_Phospho	S1778: Phospho	AEDEALLsEEDDPIDRRPWTQQHLEAADIR; AEDEALLsEEDDPIDR	-0.24	-0.06	0.14	0.69	0.28	0.92	0.25	0.01	0.19	0.54	0.11	0.48
SH3PXD2A	Q5TCZ1-3	1_Phospho	S623: Phospho	GSSGDSDSPGSSSLsLTR	0.85	0.53	0.43	-0.7	1.42	-0.53	1.48	0.59	0.37	0.5	1.15	-0.62
APEH	P13798	1_Phospho	S187: Phospho	ALDVSAsDDEIAR	-0.39	0.05	0.16	-0.46	-0.14	-0.89	-0.91	0.18	-0.12	-0.56	-0.31	-1.02
GLCCI1	Q86VQ1	1_Phospho	S172: Phospho	TSsLDTITGPYLTGQWPR	0.01	-0.26	-0.83	-0.03	-0.7	-0.29	0.22	0.06	0.56	0.47	0.05	-0.58
ELMSAN1	Q6PJG2	2_Phospho	T655: Phospho; S661: Phospho	SFELPPYtPPPILsPVR	0.21	0.19	0.21	0.09	0.01	0.62	-0.23	0.01	-0.58	-0.25	-0.37	0.63
ABLIM3	O94929-3	1_Phospho	S311: Phospho	ASsPGYIDSPTYSR	-1.05	-0.88	-0.73	-1.04	-0.29	0.19	-0.95	-0.7	-0.65	-0.48	-0.25	-0.06
MAP3K4	Q9Y6R4	1_Phospho	S1274: Phospho	GDSSGSTRRsWELR; sWELR; RsWELR	0.4	0.31	-0.03	-0.34	0.5	-0.76	0.55	0.23	-0.35	0.07	0.4	0.16
MYH9	P35579	1_Phospho	S1916: Phospho	EVSsLK	0.17	-0.44	0.27	-0.48	-0.19	-0.43	0.42	-0.06	0.01	-0.19	0.26	0.31
SEC31A	O94979	1_Phospho	S1163: Phospho	EQTLsPTITSGLHNIAR	-0.29	-0.22	0.05	-0.19	-0.23	0.16	-0.45	-0.13	-0.49	-0.57	-0.34	-0.09
SERBP1	Q8NC51-2	1_Phospho	S228: Phospho	DELTEsPKYIQK; GGSGSHNWGTVKDELTEsPKYIQK; DELTEsPK; GGSGSHNWGTVKDELTEsPK	0.27	-0.29	0.15	-1.1	0.3	0.4	0.41	-0.04	0.1	-0.2	0.61	0.45
MAP7D1	Q3KQU3	1_Phospho	S70: Phospho	QLPLEPEsPSGQVGPR	-0.19	-0.17	-0.17	0.18	0.16	-0.05	-0.98	-0.36	-1.53	-0.16	-0.84	1.9
PTPN14	Q15678	1_Phospho	S760: Phospho	KSVsNGALR; SVsNGALRQDQASLPPAMAR; SVsNGALR; KSVsNGALRQDQASLPPAMAR	-0.03	0.6	0.35	0.22	-0.04	0.01	-0.17	0.58	0.22	0.16	-0.17	-0.01
RBM12B	Q8IXT5	1_Phospho	S710: Phospho	RPPEEDFRHsPEEDFR	-0.98	0.57	0.44	0.68	0.47	0.68	-0.31	-0.05	-0.21	0.05	-0.01	0
CDC42EP1	Q00587-2	1_Phospho	S19: Phospho	SLGKLsPVGWVSSSQGK	0.11	-0.41	0.01	0.18	-0.69	0.23	-0.11	0.01	-0.6	0.22	-0.42	0.6
TRAFD1	O14545	1_Phospho	S415: Phospho	LDSQPQETsPELPR; LDSQPQEtsPELPR	-0.02	0.19	-0.37	-0.51	-0.14	0.05	-0.02	0.04	-0.37	-0.8	-0.2	-0.28
SMTN	P53814-5	2_Phospho	S357: Phospho; T360: Phospho	LQDGTPQAALsPLtPAR	0.48	-0.38	-0.19	-0.36	0.1	0.79	0.14	-0.26	-0.09	-0.28	0.33	-0.13
AKAP17A	Q02040	1_Phospho	S633: Phospho	HAYKDDsPR	-0.1	-0.39	-0.81	0.44	0.39	-0.35	0.23	0.51	0.29	0.14	0.67	1.06
PTPN14	Q15678	1_Phospho	S594: Phospho	HKYVSGSsPDLVTR; YVSGSsPDLVTR; HKYVSGSsPDLVTRK; YVSGSsPDLVTRK	-0.75	0.15	0.13	0.04	0.01	0.32	-0.64	0.13	0.26	-0.05	0.11	-0.1
SFSWAP	Q12872	1_Phospho	S832: Phospho	SVPTAYRVsR	-0.55	0.35	-0.08	-0.11	0.18	-0.05	0.17	-0.26	-0.68	-0.95	-0.37	0.34
RIN1	Q13671	1_Phospho	S611: Phospho	SLsLWEQR	1.28	0.39	0.61	0.43	1.58	-0.16	0.97	0.51	0.26	0.49	1.2	-0.09
NEURL4	Q96JN8-2	1_Phospho	S502: Phospho	ALsPEGALR; ALsPEGALRR	-0.07	-0.02	-0.09	-0.21	-0.15	0.31	-0.25	-0.16	-0.63	-0.5	-0.61	0.21
RALY	Q9UKM9-2	1_Phospho	S119: Phospho	GRLsPVPVPR; LsPVPVPR	0.38	0.59	0.13	0.16	0.14	-0.01	0.36	0.05	-0.07	0.09	0.01	-0.1
PLEC	Q15149-6	1_Phospho	S1588: Phospho	RAsFAEK	0.55	0.52	0.49	0.24	-0.05	-0.52	0.68	0.66	0.44	0.13	0.16	-0.32
HNRNPH1	P31943	1_Phospho		HTGPNSPDTANDGFVR	0.01	-0.31	-1.18	0.41	0.5	0.53	-0.1	0.2	-0.05	0.21	-0.62	-0.37
MAP7D1	Q3KQU3	2_Phospho	S93: Phospho; T97: Phospho	sRGPtPPAMGPR	0.28	0.39	-0.08	-0.03	0.3	0.62	-0.15	-0.82	-0.17	-0.15	0.33	-0.19
TBC1D4	O60343	2_Phospho	S588: Phospho; S591: Phospho	GRLGsVDsFER; LGsVDsFER	0.62	0.65	0.41	0.45	0.27	-0.16	0.51	-0.98	0.84	0.44	0.19	-0.1
ZC3H4	Q9UPT8	1_Phospho	S1275: Phospho	TGSGSPFAGNsPAREGEQDAASLKDVFK; TGSGSPFAGNsPAR	0.01	0.27	-0.2	0.15	-0.01	-0.15	0.31	0.16	-0.01	0.3	-0.07	-0.11
LUZP1	Q86V48	1_Phospho		SSTDFSELEQPR; TQSSLTVSEVLTR; AIGALASSR; VIQAEGSNSSMLAEIEVLR; EKPDSDDDLDIASLVTAK; SSSEGLSK	-0.12	0.46	0.39	-0.46	0.45	0.71	0.23	0	0.46	0.39	0.19	0.01
CPSF4	O95639	1_Phospho	S202: Phospho	SSsLIQLTSQNSSPNQQR	0.48	0.32	-0.59	0.24	0.22	-0.49	0.32	0.39	-0.24	0.08	-0.34	-0.1
CENPN	Q96H22	1_Phospho	S226: Phospho	sLGLDINMDSR	0.09	-1.66	-0.23	-0.04	-0.41	-0.28	0.41	0.09	-0.03	-0.03	-0.55	0.29
EIF3C	Q99613	1_Phospho	T524: Phospho	QLtPPEGSSK	-0.17	0.22	-0.32	-0.03	0.06	0.05	0.13	0.12	-0.11	0.5	-0.08	0.14
ACACA	Q13085	1_Phospho	S29: Phospho	FIIGSVSEDNsEDEISNLVK	0.6	0.05	0.71	0.08	0.48	-0.18	-0.56	0.4	0.03	-0.12	-0.33	0.09
CASC4	Q6P4E1-4	1_Phospho	S328: Phospho	LIPGsNLDSEPR	0.49	0.83	0.74	0.47	0.32	-0.66	0.62	0.88	0.65	0.22	-0.46	-0.58
PURA	Q00577	1_Phospho	S182: Phospho	GPGLGsTQGQTIALPAQGLIEFR	0.37	0.52	0.01	0.98	-0.96	0.62	0.97	0.86	0.81	0.69	1.04	0.23
SRRM1	Q8IYB3-2	2_Phospho	S388: Phospho; S392: Phospho	RLsPSAsPPR	-0.04	0.09	0.33	0.24	-0.06	0.13	-0.15	-0.13	0.03	0.05	-0.16	-0.01
ADRBK1	P25098	1_Phospho	S670: Phospho	sPVVELSK	-0.03	0.22	0	-0.08	0.02	-0.46	0.14	0.58	-0.74	0.22	-0.36	0.96
CLASP1	Q7Z460-3	1_Phospho	S688: Phospho	SSsPGKLLGSGYGGLTGGSSR	0.14	-0.04	-0.39	0.17	-0.02	-0.28	0	0.04	0.42	0.43	0.27	-0.47
PRRC2B	Q5JSZ5	1_Phospho	S226: Phospho	HIISATSLSTsPTELGSR	0.15	0.12	-0.19	0.38	-0.2	0.31	0.21	0.2	-0.17	0.06	-0.05	-0.22
SNRNP70	P08621-4	1_Phospho	S130: Phospho	YDERPGPsPLPHR; YDERPGPsPLPHRDR	-0.01	0.05	-0.9	0.04	-0.04	0.12	0.2	0	-0.2	0.04	-0.05	-0.47
EEF1G	P26641	1_Phospho	T46: Phospho	VLSAPPHFHFGQTNRtPEFLR; tPEFLR	-0.25	0.08	0.23	-0.39	0.35	-0.69	-0.34	0.16	-0.13	-0.68	0.04	0.11
ZC3HC1	Q86WB0-3	1_Phospho	S321: Phospho	LPLVPEsPRR; LPLVPEsPR	-0.14	-0.1	0.09	-0.18	-0.11	-0.09	-0.24	-0.02	-0.24	0.04	-0.19	0.6
FAM129A	Q9BZQ8	1_Phospho	S646: Phospho	GESLSLPGPsPPPDGTEQVIISR	0.46	0.37	0.56	0.89	0.41	-0.52	0.3	-0.12	-0.69	-0.36	0.06	-0.06
LRFN4	Q6PJG9	1_Phospho	S575: Phospho	AHPPRsPPPRPQR	0.08	-0.25	-0.33	0.03	-0.24	-0.07	0.06	0.05	-0.17	-0.04	-0.39	-0.47
NCAPD3	P42695	1_Phospho	S1384: Phospho	TLNSGsPEK; SLGVLPFTLNSGsPEK	-0.01	-0.26	0.33	-0.25	-0.27	0.02	0.06	0.28	0.35	0.3	0.28	0.52
EPB41L3	Q9Y2J2	1_Phospho	T401: Phospho	FLtLGSK	0.76	-0.79	1.31	0.74	1.55	0.25	0.49	-0.32	0.27	0.32	1.02	0.1
NUP188	Q5SRE5-2	1_Phospho	S1606: Phospho	GAPSSPATGVLPsPQGK	0.12	0.31	0.4	0.07	0.29	0.28	-0.19	-0.16	-0.2	-0.54	-0.1	0.54
NUP133	Q8WUM0	1_Phospho	T28: Phospho	RGPLAGLGPGStPR	0.27	0.19	0.24	-0.2	0.37	0.31	0.05	-0.06	0.12	-0.17	0.06	0.24
DOK1	Q99704	1_Phospho	S460: Phospho	SGASGsWDCGLSR	0.15	0.29	0.34	-0.25	0.13	-0.38	-0.11	0.26	-0.1	-0.21	-0.36	-0.14
HNRNPA3	P51991-2	1_Phospho		SSGSPYGGGYGSGGGSGGYGSR	0.21	-0.04	0.26	-0.14	0.54	-0.18	-0.13	-0.45	-0.24	-0.22	-0.01	0.09
ACACA	Q13085	1_Phospho	S23: Phospho	FIIGsVSEDNSEDEISNLVK	0.27	0.18	0.84	-0.12	0.89	0.37	-0.01	0.7	0.9	-2.11	0.99	-0.04
RNF19A	Q9NV58	1_Phospho	S69: Phospho	ISIGsLFR	-0.57	0.1	0.2	0.06	-0.3	-0.16	-0.25	0.27	0.05	0.18	-0.24	0.38
AHNAK	Q09666	1_Phospho	S5589: Phospho	IKGGADVSGGVSAPDISLGEGHLsVK; GGADVSGGVSAPDISLGEGHLsVK	0.38	-0.49	0.93	0.85	0.68	-0.11	0.36	0.54	0.63	0.72	0.44	-0.19
LRWD1	Q9UFC0	1_Phospho		ACASPSAQVEGSPVAGSDGSQPAVK	-0.29	0	0.35	-0.11	-0.09	0.09	0.21	0.41	-0.6	0.11	0.31	0.31
RAB7A	P51149	1_Phospho	S72: Phospho	FQsLGVAFYR	0.35	0.07	-1.18	0.1	0.91	0.49	0.2	0.07	-0.12	-0.23	0.93	-1.03
HNRNPA3	P51991-2	1_Phospho	S336: Phospho	SSGsPYGGGYGSGGGSGGYGSR; SSGsPYGGGYGSGGGSGGYGsR; SSGsPYGGGYGSGGGsGGYGSR; SSGsPYGGGYGsGGGSGGYGSR	0.07	-0.09	0.01	0.06	0.16	-0.11	0.25	-0.04	-0.05	0.02	0.12	-0.02
EZR	P15311	No Phospho		AKFYPEDVAEELIQDITQK; RKPDTIEVQQMK; IQVWHAEHR; IDEFEAL	0.54	0.35	-1.12	0.74	0.4	0.04	0.12	0.12	0.47	0.11	-0.19	0.31
SPICE1	Q8N0Z3	2_Phospho	S760: Phospho; S764: Phospho	LVGLNLsPPMsPVQLPLR	0.23	0.1	0.25	-0.75	0.4	0.02	0.03	0.03	0.22	-0.71	0.25	0.52
H2AFX	P16104	1_Phospho	S140: Phospho	KATQAsQEY	-0.01	0.3	0.2	0.42	-0.18	-0.01	0.09	0.28	0.36	0.31	0.27	-0.05
GALNT7	Q86SF2	1_Phospho	S103: Phospho	AKNEQEHHAGGDsQKDIMQR; NEQEHHAGGDsQKDIMQR	-1.35	-0.19	0.08	0.01	-0.73	-0.31	-0.74	0.11	0.44	0.29	-0.31	-0.22
KIAA1671	Q9BY89	1_Phospho	S508: Phospho	TFQARPLsADLTK	-0.09	0.72	0.56	-0.16	-0.03	-0.51	0.06	0.6	0.26	-0.2	0.02	1.97
NDE1	Q9NXR1	1_Phospho	S282: Phospho	NLVYDQsPNR	-0.04	-0.08	0.12	0.25	-0.23	0.24	-0.08	0.19	0.16	0.25	-0.42	0.33
AJUBA	Q96IF1	1_Phospho	S119: Phospho	LEPtAPALsPR; LEPTAPALsPR	0.1	-0.31	0.39	-0.04	-0.74	0.42	-0.1	-0.38	0.03	-0.1	-0.9	0.6
OTUD4	Q01804	1_Phospho	S1048: Phospho	SKQFYNQTYGsR	0.8	-0.21	0.21	0.31	0.62	-0.17	0.54	0.38	0.67	0.77	1	-0.41
EPS8	Q12929	1_Phospho	T223: Phospho	APAPAPPGtVTQVDVR	0.05	0.43	0.81	0.88	-0.39	0.53	-0.91	0.03	0.31	0.27	-1.2	0.8
CACNB3	P54284	1_Phospho	S152: Phospho	sPPPSLAK; SGNPSSLSDIGNRRsPPPSLAK	-0.18	0.86	-0.09	0.07	0.18	0.26	0.38	0.71	0.87	0.34	0.26	-0.3
MLLT4	P55196-1	1_Phospho	T1317: Phospho	SVTPAStLTK	0.77	-0.66	0.61	0.38	0.89	-0.07	0.05	-0.76	0.66	-0.06	0.4	-0.1
ATXN2	Q99700-2	1_Phospho	S667: Phospho	TsPSGGTWSSVVSGVPR	0.09	0.03	0.01	-0.23	0.08	-0.06	0.21	0.32	-0.05	0.12	0.01	0.18
EIF3A	Q14152	1_Phospho	S1028: Phospho	GLDEDRGsWR	0.02	-0.05	0.05	0.22	0.5	0.22	0.05	-0.11	0.12	0.01	0.14	0.47
SRSF11	Q05519	1_Phospho	S449: Phospho	KPIETGsPK; KPIETGsPKTK; EEKKPIETGsPK	0.15	-0.14	0.38	-0.13	0.3	-0.22	0.05	0.09	-0.07	-0.07	0.1	0.15
NCKAP5L	Q9HCH0-3	1_Phospho	T1209: Phospho	NWtFPNTR	0	0.2	-0.64	-0.28	0.26	-0.77	0.26	0.32	-0.02	0.06	0.45	-0.61
SIRT1	Q96EB6-2	1_Phospho	S47: Phospho	sPGEPGGAAPER; DGPGLERsPGEPGGAAPER; RDGPGLERsPGEPGGAAPER	-0.24	0.07	-0.2	-0.05	-0.07	0.2	-0.16	-0.37	0.69	0.28	0.29	-0.59
GAS2L1	Q99501-2	1_Phospho	S292: Phospho	VCTFsPQR	0.31	0.39	-0.01	0.03	0.21	-0.09	0.33	0.27	-0.11	-0.21	0.17	-0.01
UCKL1	Q9NWZ5-4	1_Phospho	S41: Phospho	LLPPVGTGRsPR	0.06	0.01	0.55	0.21	0.37	0.26	-0.35	-0.35	-0.1	-0.22	0	0.12
CCDC6	Q16204	1_Phospho	S52: Phospho	SGGIVIsPFRLEELTNR; SGGIVIsPFR	-0.06	0.28	0.13	-0.13	0.25	0.38	-0.06	0.37	0.17	0.05	0.15	0.5
PPFIA1	Q13136	1_Phospho	S668: Phospho	VGSGsLDNLGR	0.3	-0.29	0.27	-0.55	0.08	0.37	-0.02	0.1	0.14	-0.26	-0.02	0.26
SETX	Q7Z333-4	1_Phospho	S947: Phospho	EQAPDIsPK	-0.13	-0.13	0.15	0.2	-0.23	-0.23	-0.26	-0.42	-0.8	-0.73	0.13	-0.09
TP53BP1	Q12888-2	1_Phospho	S836: Phospho	SGTAETEPVEQDSsQPSLPLVR	0.11	-0.33	-0.44	-0.89	-0.93	0.43	-0.08	0.16	-0.37	0.08	-0.04	-0.03
C17orf85	Q53F19	1_Phospho	S25: Phospho	AEAPAGPALGLPsPEAESGVDR	-0.42	-0.13	-0.13	-0.44	-0.04	0.15	-0.26	-0.11	-0.42	0.17	-0.48	0.71
OSBPL11	Q9BXB4	1_Phospho	S172: Phospho	sFSLASSSNSPISQR	1.21	0.67	0.37	1.38	0.99	0.06	0.36	0.15	-0.09	0.26	0.13	0.06
BAD	Q92934	1_Phospho	S99: Phospho	sAPPNLWAAQR	-0.27	0.4	-0.2	0.28	-0.11	-0.04	-0.32	0.32	-0.04	0.24	-0.19	0.3
CHST7	Q9NS84	1_Phospho	S328: Phospho	VLLAHGVGARPGGQsR	1.3	1.33	1.26	1.07	0.59	0.13	0.49	0.41	0.4	0.4	0.26	0.22
ARHGAP31	Q2M1Z3	1_Phospho	S1178: Phospho	RNsAPVSVSAVR	0.24	0.24	-0.08	0.68	0.24	0.44	-0.13	0.31	-0.25	0.27	0.29	0.5
RAPGEF6	Q8TEU7-5	1_Phospho	S1102: Phospho	RSsLLNAK	0.3	0.32	-0.28	0.48	0.02	0.06	0.16	0.25	0.29	0.09	-0.05	-0.45
MIOS	Q9NXC5	1_Phospho	S766: Phospho	GFSQYGVSGsPTK	-0.15	-0.13	0.2	-0.12	-0.38	0.05	0.07	0.04	0.09	-0.26	-0.12	0.11
JUN	P05412	1_Phospho	S58: Phospho	AKNsDLLTSPDVGLLK	0.16	-0.03	0	0.26	-0.55	-0.42	-0.63	0.24	-0.25	0.08	0.14	-0.18
TIMELESS	Q9UNS1	1_Phospho	S281: Phospho	FGGsYIVQGLK	1.4	0.07	0.47	0.85	0.9	0.04	0.57	0.65	0.75	1.05	0.58	0.13
SLC26A6	Q9BXS9	1_Phospho	S616: Phospho	GASVSINVNTsLEDMR	-0.37	0.06	0.14	-0.19	-0.03	-0.18	0.26	0.39	0.2	0.06	0.69	0.36
YBX1	P67809	No Phospho		EDGNEEDKENQGDETQGQQPPQR; AADPPAENSSAPEAEQGGAE	0.21	0.76	0.25	-0.45	0.14	-0.36	-0.01	0.11	-0.44	-0.42	-0.49	0.15
AKAP11	Q9UKA4	1_Phospho	S1242: Phospho	SVsPTFLNPSDENLK	-0.09	0.64	0.25	0.43	0.35	-0.07	0.06	0.72	0.5	0.56	0.37	-0.12
RPS6KA1	Q15418-3	2_Phospho	T267: Phospho; S271: Phospho	tPKDsPGIPPSAGAHQLFR	0.08	0.1	0.24	0.19	0.15	0.33	-0.4	-0.43	-0.12	-0.51	-0.52	0.1
NBN	O60934	1_Phospho	S397: Phospho	MLsQDAPTVK	0.25	0.15	-0.18	0.63	0.67	0.08	-0.58	-0.43	-0.4	-0.3	-0.1	-0.84
LMNB1	P20700	1_Phospho	S23: Phospho	AGGPTTPLsPTR	0.05	-0.68	0.47	-0.54	0.2	0.18	0.13	-0.76	0.26	-0.75	0.31	0.28
SET	Q01105-3	1_Phospho	S38: Phospho	LNEQAsEEILK; EQQEAIEHIDEVQNEIDRLNEQAsEEILK	-0.57	0.17	0.02	-0.23	0.23	-0.35	0.02	0.82	-0.02	0.85	0.58	0.53
SMTN	P53814-5	1_Phospho		STSFGVPNANSIK; ESTPLASGPSSFQR; ETPAAQSPTRGPSDTK	0.66	0.1	-0.37	0.12	1.09	0.67	0.33	-0.33	0.47	0.68	0.32	-0.27
AKAP12	Q02952	1_Phospho	S364: Phospho	LTASEQAHPQEPAEsAHEPRLsAEYEK; LTASEQAHPQEPAEsAHEPRLSAEYEK	-0.22	-1.44	-0.1	0.1	-0.15	-0.03	-0.6	-0.11	-0.03	-0.37	0.06	0.11
ZC3H13	Q5T200	2_Phospho	S207: Phospho; S209: Phospho	SKLsPsPSLR	0.03	0.12	0.19	0.24	-0.11	0.2	0.11	-0.06	-0.07	0.06	0.08	0.05
ERF	P50548	1_Phospho	T526: Phospho	GEGPGEAGGPLtPRR; GEGPGEAGGPLtPR	-0.05	-0.22	-0.03	-0.04	0.39	0.43	-0.16	-0.07	-0.12	0.15	0.14	0.45
DCBLD2	Q96PD2	1_Phospho		YSSSEVNHLSPR; EVTTVLQADSAEYAQPLVGGIVGTLHQR; TDSCSSAQAQYDTPK; ATGNQPPPLVGTYNTLLSR	0.2	0.17	0.43	0.47	-0.13	-0.75	0.33	-0.04	0.63	0.83	0.46	0.31
TMPO	P42167-2	1_Phospho	S168: Phospho	SSTPLPTISSsAENTR; SStPLPTISSsAENTR	0.17	0.44	0.39	0.43	0.27	0.12	1.47	0.63	0.41	0.71	0.2	-0.43
TSC2	P49815-2	1_Phospho		SSSSPELQTLQDILGDPGDK; SSSSPELQTLQDILGDPGDKADVGR; LISSVEDFTEFV; VVSSEGGRPSVDLSFQPSQPLSK	1.02	0.22	0.39	-0.21	1.34	0.48	0.22	0.22	0.23	-0.05	-0.1	-0.61
TBC1D10B	Q4KMP7	2_Phospho	S661: Phospho	QQPPLGPSSSLLsLPGLK	0.04	-0.08	0.01	-0.3	-0.51	0.03	0.07	0.09	-0.07	0.12	-0.57	0.26
F11R	Q9Y624	1_Phospho	S296: Phospho	QTSsFLV; SEGEFKQTSsFLV	0.4	-0.82	0.08	-0.32	0.07	-0.5	-0.05	-1.12	-1.42	-0.93	-0.48	-0.44
TJP2	Q9UDY2-4	1_Phospho	S989: Phospho	GSYGsDAEEEEYRQQLSEHSK; GSYGsDAEEEEYR	-0.3	-0.64	0.08	-1.26	0	0.52	-0.28	-0.35	-0.16	-0.93	-0.12	0.73
PRRC2A	P48634-4	1_Phospho	S808: Phospho	LAWVGDVFTATPAEPRPLTsPLR	0.49	0.38	-0.07	0.4	0.43	-0.27	-0.02	-0.06	-0.13	-0.25	0.08	-0.04
ATXN2L	Q8WWM7	1_Phospho	S306: Phospho	EIESsPQYR	0.28	-0.33	0.11	-0.1	0.3	0.55	0.25	0.13	0.4	-0.47	0.51	1.09
CDCA5	Q96FF9	1_Phospho	S75: Phospho	IVAHAVEVPAVQsPR	0.32	-0.29	0.74	-0.49	0.39	0.47	-0.3	-0.35	-0.28	-0.33	-0.04	0.95
RAI14	Q9P0K7-3	2_Phospho	S282: Phospho; S285: Phospho	QLSDVSsPRsITSTPLSGK	-0.92	-0.5	-0.14	-0.33	-0.96	0.11	-1.97	-0.85	-0.62	-0.43	-0.67	0.48
SH2B3	Q9UQQ2	1_Phospho	S120: Phospho	ARsSEELAPPRPPGPCSFQHFR; sSEELAPPRPPGPCSFQHFR	0.48	0.57	0.31	-0.37	0.55	-0.41	0.15	-0.23	0.26	-0.53	0.07	-0.55
LEMD3	Q9Y2U8	1_Phospho	S352: Phospho	NLEEAAAAEQGGGCDQVDSsPVPR	-0.43	-0.82	-0.25	-2.14	-0.28	0.58	-0.47	-1.07	-0.7	0.12	-0.06	0.66
SCAF11	Q99590	1_Phospho	S608: Phospho	TEELIEsPKLESSEGEIIQTVDR; TEELIEsPK	-0.49	0.14	0.05	0.37	-0.16	0.13	-0.11	-0.17	-0.16	0.19	-0.05	0.14
YWHAZ	P63104	No Phospho		LTLWTSDTQGDEAEAGEGGEN; SVTEQGAELSNEER; DNLTLWTSDTQGDEAEAGEGGEN; DICNDVLSLLEK	-0.17	0.03	-0.35	-0.16	0.07	-0.72	-0.09	-0.01	0	-0.11	0.07	0.11
SRRM2	Q9UQ35-2	2_Phospho	S952: Phospho; S954: Phospho	sVsPCSNVESR	-0.22	0.02	-0.09	0.13	-0.26	0.05	-0.29	-0.66	-0.34	0.21	-0.1	0.11
LRRFIP1	Q32MZ4	1_Phospho	S16: Phospho	EIDCLsPEAQK	-0.51	-1.38	0	-0.66	-0.16	0.76	-0.28	-0.56	0	-1.21	0.25	0.73
MGA	Q8IWI9	1_Phospho		QPGNGKTDQGILVTNQDACALASSVSSPVK; WLPSSPSGVAK; NTPVSPGSTFPDVKPDLEDVDGVLFVSFESK	0.21	-0.25	0.09	0.18	0.34	0.08	0.2	0.01	-0.18	0.6	0.19	0.16
ADD3	Q9UEY8	1_Phospho	S64: Phospho	VTQILQsPAFREDLECLIQEQMK; VTQILQsPAFR	-0.08	0.46	0.31	-0.26	-0.08	-0.05	-0.01	-0.26	-0.05	0.28	-0.11	-0.15
TNS1	Q9HBL0	1_Phospho	S1177: Phospho	AQFSVAGVHTVPGsPQAR	-0.57	-0.13	0.14	-0.34	0.17	0.16	-0.69	-0.15	0.07	-0.67	0.03	0.15
CALD1	Q05682-5	1_Phospho	S196: Phospho	RGsIGENQIK; GsIGENQIKDEK; RGsIGENQIKDEK	-0.57	-0.27	-0.19	-0.37	0.03	0.01	-0.27	-0.09	-0.21	-0.2	0.2	0.31
GOSR1	O95249	1_Phospho	S141: Phospho	ERENLMGsVR	0.43	-0.53	-0.25	0.08	0.24	-0.18	0.32	-0.28	-0.13	0.38	0.04	-0.03
PCDHGC3	Q9UN70	1_Phospho	S766: Phospho	GGLMSPHLYHQVYLTTDsR	0.89	0.24	0.51	0.64	-0.81	-0.93	0.63	0.42	0.15	0.41	0.03	-0.12
EPB41	P11171-2	1_Phospho	S676: Phospho	RLsTHSPFR	-0.43	-0.07	-0.09	-0.61	-0.33	0.13	-0.9	-0.22	-0.55	-0.91	-0.53	0.7
RAVER1	Q8IY67-2	1_Phospho	S612: Phospho	EPALGPHGPsR	-0.09	-0.19	-0.09	-0.79	0.24	-0.56	-0.36	-0.2	-0.25	-0.2	0.4	0.34
ATG9A	Q7Z3C6-2	1_Phospho	S595: Phospho	SFsPLQPGQAPTGR; AEVAsALRSFsPLQPGQAPTGR	0.52	0.19	0.12	-0.02	0.33	0.3	0.39	-0.04	-0.44	-0.15	0.24	0.03
ZC3H13	Q5T200	2_Phospho	T354: Phospho; S356: Phospho	KRtPsPSYQR	-0.01	0.01	-0.19	0.12	0	0.59	0.01	-0.32	-0.01	-0.35	0.1	-0.14
CDC26	Q8NHZ8	1_Phospho	S82: Phospho	SSQFGsL; SSQFGsLEF	0.38	1.04	0.11	0.82	0.3	0.14	0.07	0.19	0.1	-0.41	0.05	0.35
CAMSAP1	Q5T5Y3-2	1_Phospho	S351: Phospho	RPsEGPQPLVR	0.97	0.53	0.5	0.43	0.4	0.14	0.23	-0.25	0.25	0.12	-0.06	0.32
IRAK2	O43187	1_Phospho	S144: Phospho	MATFPGPGSsPAR	-0.05	-0.63	-0.44	-0.97	0.27	0.16	-0.05	0.1	-0.22	-0.59	-0.07	-0.3
VIM	P08670	1_Phospho	S39: Phospho	TYsLGSALRPSTS; TYsLGSALRPSTSR	0.52	0.31	-0.31	0.23	0.33	-0.05	0.9	0.51	0.43	0.39	0.46	-0.41
PTGFRN	Q9P2B2	1_Phospho	S875: Phospho	LMsMEMD; RLMsMEMD	0.56	1.18	-0.17	1.02	-0.02	-0.51	0.14	0.44	-0.2	0.45	-0.35	-0.19
G3BP1	Q13283	1_Phospho	S232: Phospho	SSsPAPADIAQTVQEDLR; SSsPAPADIAQtVQEDLR; KSSsPAPADIAQTVQEDLR; sSsPAPADIAQTVQEDLR; SSsPAPADIAQTVQEDLRT; sPAPADIAQTVQEDLR	-0.07	-0.14	-0.51	0.18	0.13	0.01	-0.22	-0.63	-0.49	-0.38	-0.1	-0.52
LMNA	P02545-3	1_Phospho	S392: Phospho	LSPsPTSQR; LRLSPsPTSQR	0.39	0.52	0.53	0.18	0.52	0.1	0.57	0.61	0.4	0.25	0.65	0.2
URI1	O94763-3	1_Phospho	S416: Phospho	SIsCEEATCSDTSESILEEEPQENQKK; SIsCEEATCSDTSESILEEEPQENQK	0.14	-0.7	0.58	0.17	0.58	0.23	0.48	0.54	0.39	-0.35	0.08	0.58
LARP1	Q6PKG0-3	1_Phospho	S747: Phospho	HSsNPPLESHVGWVMDSR	0.36	-0.25	-0.39	-0.02	0.31	0.91	0.48	-0.12	0.05	0.89	0.19	-0.73
BCLAF1	Q9NYF8	2_Phospho	S268: Phospho	NTPSQHSHSIQHsPER	-0.14	0.33	-0.83	0.38	-0.06	0.79	-0.05	-1.89	0	-0.11	0.47	-1.18
ZNF638	Q14966	1_Phospho	S1401: Phospho	AVIVSsPK	0.07	-0.26	0.13	0	-0.08	0.12	0.22	-0.14	0.01	0.23	0.15	0.39
TANK	Q92844	1_Phospho	S129: Phospho	SLGsPLLHER	0.12	-0.28	0.16	-0.4	0.65	-0.14	0.44	0.15	0.26	-0.19	0.73	0.03
EPB41	P11171	1_Phospho	S85: Phospho	LFSsFLK	-1.39	-0.95	-0.29	-0.17	-0.78	0.43	-1.04	-0.12	-0.09	-0.1	-0.39	0.29
IRF2BP2	Q7Z5L9-2	1_Phospho	S175: Phospho	LEEPPELNRQsPNPR; LEEPPELNRQsPN	0.06	0.27	0.21	0.43	-0.09	-0.1	0	0.35	0.14	0.38	-0.11	0.02
SETD2	Q9BYW2-3	1_Phospho	S1228: Phospho	SWQQTTFQNRPDsR	0	-0.26	0.24	0.06	-0.34	-0.55	-0.41	-0.48	-0.87	-0.29	-1.17	-0.13
SRRM1	Q8IYB3-2	1_Phospho	S636: Phospho	VSHsPPPK; VSHsPPPKQR; RVSHsPPPKQR	0.16	-0.74	-0.91	0.06	-0.47	-0.17	0.66	0.87	0.77	0.89	0.51	-0.44
DNER	Q8NFT8	1_Phospho	S696: Phospho	SIDSEFSNAIAsIR	-0.01	0.18	0.09	0.16	0.86	1.62	-0.74	-0.54	0.01	0.27	1.25	0.66
IRF2BPL	Q9H1B7	1_Phospho	S658: Phospho	RNSsSPVSPASVPGQR; NSsSPVSPASVPGQR	0.21	0.03	0.19	0.3	0.19	-0.24	-0.02	-0.13	-0.13	-0.26	0	0.07
RSRC2	Q7L4I2-2	2_Phospho	T172: Phospho; S174: Phospho	SLSRtPsPPPFR	0.05	0.24	1.66	0.19	-0.49	0.56	0.44	0.54	1.17	0.61	-0.26	0.46
PHF12	Q96QT6	1_Phospho	S131: Phospho	TTsPSSDTDLLDR	0.36	0.41	-0.42	0.45	-0.01	-0.1	0.21	0.06	-0.49	0.22	-0.07	-0.39
CTTNBP2NL	Q9P2B4	1_Phospho	S549: Phospho	GDTSHsPTPGK	-0.45	-0.47	0.04	-0.55	-0.22	0.04	-0.67	-0.18	-0.3	-0.43	-0.32	0.34
PDHA2	P29803	1_Phospho	S293: Phospho	YHGHSMsDPGVSYR	0.49	-0.8	-0.17	0.12	0.02	0.1	0.6	0.47	0.57	0.51	0.45	-0.03
SEC22B	O75396	1_Phospho	S137: Phospho	NLGsINTELQDVQR; NLGsINtELQDVQR; RNLGsINTELQDVQR	1.97	1.37	1.33	1.83	0.24	-0.61	2.03	1.2	0.74	1.54	0.58	-0.42
HELZ	P42694	1_Phospho	T1163: Phospho	AYtPPPPLGPHPNLGK	0.44	1.18	1.39	1.09	1.4	-0.07	0.19	0.1	0.45	0.47	0.47	-0.01
NCOR1	O75376	1_Phospho	S2184: Phospho	NDARsPGSISYLPSFFTK; sPGSISYLPSFFTK	-1.02	-0.52	-0.31	-0.38	-0.54	-0.27	-0.38	0.06	0.24	0.15	0.31	-0.33
CEP350	Q5VT06	1_Phospho	S1648: Phospho	GHHDDsDEEASPEK	-0.21	-1.39	-1.01	0.52	0.29	0.04	0.86	0.81	1.37	1.25	1.25	-0.46
DOT1L	Q8TEK3-2	1_Phospho	S775: Phospho	LSGLAAPDYTRLsPAK	0.83	0.42	0.41	0.37	-0.04	0.16	0.21	0.08	0.14	0.13	-0.15	0.1
ANKRD12	Q6UB98	1_Phospho	S543: Phospho	DDTSLHLFHISTGKsPK	0.09	0.7	0.06	0.77	0.68	-0.62	-0.58	0.32	-0.2	0.42	-0.04	0.08
SMNDC1	O75940	1_Phospho	S201: Phospho	SIFAsPESVTGK	-0.03	-0.34	0.02	-0.48	0.01	0.87	-0.53	-0.24	0.02	-0.29	0.03	0.87
R3HCC1	Q9Y3T6-2	1_Phospho	S49: Phospho	FGsTLQLDLEK	0.42	-0.31	-0.64	-0.27	0.56	0.06	0.45	0.75	1	0.12	0.9	-1.23
LAMTOR1	Q6IAA8	1_Phospho		LAVLSSSLTHWK; KLPPLPSLTSQPHQVLASEPIPFSDLQQVSR	0.52	0.55	0.51	0.39	0.46	0.89	-0.13	0.2	-0.58	-0.23	0.03	-0.07
SRRM2	Q9UQ35-2	1_Phospho	T1531: Phospho	TVARtPLGQR	0.1	-0.04	0.36	0.21	-0.15	-0.11	0.11	-0.39	0.29	-0.14	0.03	0.03
PIK3C2A	O00443	1_Phospho	S259: Phospho	VSNLQVsPK	-0.16	-0.12	-0.11	0.05	0.17	0.14	-0.08	0.02	-0.07	-0.02	0.3	0.1
SAFB	Q15424	1_Phospho	S604: Phospho	SVVsFDK; SVVsFDKVK; SVVsFDKVKEPR	-0.09	-0.05	0.09	0.2	0.38	-0.16	0.35	0.25	0.14	0.27	0.42	0.29
SAAL1	Q96ER3	1_Phospho	S6: Phospho	NPsPPPPGR; MDRNPsPPPPGR	-0.35	0.2	-0.05	-0.41	-0.01	-0.34	0.86	-0.04	0.51	0.67	0.45	-1.01
ARPC5L	Q9BPX5	1_Phospho	S64: Phospho	AFHAALRNsPVNTK	0.24	-0.45	-1.59	-0.24	0.13	0.38	0.59	0.54	0.57	0.43	0.66	-0.97
ARHGAP39	Q9C0H5	1_Phospho	S366: Phospho	QGPPsPCQQLVLTK	-0.36	-0.11	-0.01	0.06	-0.3	0.42	-0.51	-0.53	-0.71	-0.44	-0.71	0.46
AAK1	Q2M2I8	1_Phospho	T606: Phospho	VQTtPPPAVQGQK	0.33	0.03	-0.22	0.21	0.32	0.09	0.24	0.2	-0.33	0.21	0.25	0.1
FOXK1	P85037	3_Phospho	S416: Phospho; S420: Phospho; S428: Phospho	sAPAsPTHPGLMsPR	0.01	-0.05	0.08	0.01	-0.07	0.72	-0.1	-0.79	0.17	-0.1	0.14	-0.04
TP53BP1	Q12888-2	1_Phospho	S1661: Phospho	KITEsPR	-0.03	-0.17	0.43	-0.05	-0.36	0.26	-0.23	-0.07	0.13	0.03	-0.27	0.39
EMD	P50402	1_Phospho	S173: Phospho	DSAYQSITHYRPVSAsR	-0.09	0.26	-0.05	-0.38	0.02	0.02	0.52	0.1	0.29	1.45	-0.16	-0.96
DYNC1H1	Q14204	1_Phospho	S4370: Phospho	TDSTsDGRPAWMR; TRTDSTsDGRPAWMR	0.08	-0.07	-0.46	0.09	0.29	0.11	-0.16	-0.2	-0.48	-0.07	0.13	-0.29
ASXL2	Q76L83-2	1_Phospho	S637: Phospho	FCLSsPTEALK	-0.67	-0.29	-0.08	-0.42	-0.22	-0.18	-0.33	-0.08	-0.03	-0.26	0	0.36
HTATSF1	O43719	1_Phospho	S702: Phospho	LFEDDDsNEK	-0.11	-0.27	0.08	-0.03	-0.35	0.17	-0.95	-1.05	-1.39	-1.21	-0.46	0.44
TP53	P04637-9	1_Phospho	T18: Phospho	TCPVQLWVDStPPPGTR	0.39	-0.36	-0.2	-0.11	-0.21	0.29	0.16	0.25	-0.12	0.16	-0.22	0.15
MAP3K11	Q16584	1_Phospho	S524: Phospho	NVFEVGPGDsPTFPR	-0.49	-0.57	-0.26	-0.41	0.22	-0.09	-0.09	-0.05	0.05	0.02	0.6	0.4
DYRK2	Q92630	1_Phospho	S30: Phospho	QLQAsPGLGAGATR	0.49	0.59	0.18	0.38	0.51	0.31	-0.15	-1.94	0.19	0.44	-0.09	-0.38
CDKN2A	P42771-2	No Phospho		IDAAEGPSDIPD	0.13	0.05	-0.35	0.26	-0.12	-0.61	0.32	-0.78	-1.38	-1.13	-0.18	-0.31
ATP13A3	Q9H7F0	1_Phospho	S817: Phospho	LVHDsLEDLQMTR	-0.28	-0.68	-0.78	-0.07	0.23	-0.4	0.53	0.24	0.37	0.42	0.57	-1.09
SLC4A7	Q9Y6M7-9	1_Phospho	S238: Phospho	sFADIGK; IPLVRsFADIGK; sFADIGKK	-1.77	0.03	0.19	0.53	-0.58	-0.29	-1.86	0.37	-0.73	0.43	-0.58	-0.08
KIAA1704	Q8IXQ4-4	1_Phospho	S105: Phospho	QDDsPPRPIIGPALPPGFIK; KQDDsPPRPIIGPALPPGFIK	-0.07	0.03	-0.14	-0.21	-0.48	0.02	0.14	0.29	0.02	0.08	-0.06	-0.34
LARP7	Q4G0J3	1_Phospho	S300: Phospho	SSsEDAESLAPR	-0.26	-0.16	-0.38	-0.01	0.05	0.07	0	-0.23	0.02	0.21	0.17	-0.31
SPHK2	Q9NRA0	1_Phospho	S387: Phospho	LSYLPATVEPAsPTPAHSLPR	-0.21	0.24	-0.17	0.79	-0.35	0.27	0.61	0.19	0.09	0.03	0.65	-0.02
UBE2J1	Q9Y385	1_Phospho	S266: Phospho	RLsTSPDVIQGHQPR	0.09	-0.06	0.24	0.04	0.13	0.19	0.09	0.12	0.04	0.12	-0.05	0.23
CDK13	Q14004-2	3_Phospho	S315: Phospho; S317: Phospho; S325: Phospho	sLsPLGGRDDsPVSHR	-0.04	0.27	0.4	-0.11	-0.06	0.59	-0.32	-1.23	-0.22	-0.64	0.44	0.07
SGPP1	Q9BX95	1_Phospho	S112: Phospho	RNsLTGEEGQLAR; NsLTGEEGQLAR	-0.08	0.51	0.16	-0.19	0.67	0.12	-0.98	-0.46	-1.08	-1.29	-0.11	0.35
MAPK8IP3	Q9UPT6	1_Phospho	S365: Phospho	TGSsPTQGIVNK	-0.14	-0.19	-0.15	-0.5	0.16	0.37	0.01	0.01	-0.27	-0.35	-0.05	0.18
MACF1	Q9UPN3-3	1_Phospho	S2398: Phospho	AFLAELEQNsPK	-0.36	-0.06	-0.04	-0.1	0.14	0.41	-0.24	0.24	-0.09	0.14	0.23	0.64
TACC1	O75410-3	1_Phospho	S81: Phospho	ASYHFSPEELDENTsPLLGDAR	-0.19	0.07	0.52	-0.52	-0.13	0.44	0.33	-0.59	0.22	0.11	0.39	0.55
MAP4K4	O95819-2	1_Phospho	S814: Phospho	QTQsASSTLQK	0.63	0.45	0.05	0.1	0.52	-0.55	0.42	-0.06	-0.06	-0.05	0.71	-0.38
KIAA1683	Q9H0B3	1_Phospho	S125: Phospho	QKLIsQMMAAK	0.81	1.97	0.37	1.7	0.39	-0.56	0.52	1.04	0.82	0.67	0.03	-1.06
RBM15B	Q8NDT2	1_Phospho	S109: Phospho	ASGDPGASGMsPR	0.07	0.05	0.03	-0.28	-0.07	-0.17	0.3	-0.2	0.12	-0.22	0.12	-0.27
INPP5F	Q9Y2H2	1_Phospho	S942: Phospho	KSPsAGDVHILTGFAK; KSPsAGDVHILTGFAKPMDIYCHR; SPsAGDVHILTGFAKPMDIYCHR; SPsAGDVHILTGFAK	-0.78	0.16	0.09	0.12	0	-0.93	-0.55	0.64	0.14	0.41	0.02	-0.19
PLEC	Q15149-6	1_Phospho	S1599: Phospho	TAQLERsLQEEHVAVAQLR; sLQEEHVAVAQLR	-0.2	0.31	0.26	-0.21	0.04	-0.28	0.24	0.54	0.7	0.41	0.48	0.1
C16orf88	Q1ED39	1_Phospho	S42: Phospho	YSVLNNDDYFADVsPLR	-0.05	-0.28	-0.01	-0.43	-0.18	-0.14	0.16	-0.23	-0.15	-0.33	-0.27	0.25
PPIP5K1	Q6PFW1-4	1_Phospho	S1126: Phospho	TLHsPPLQLQQR	0.22	-0.07	-0.27	0.14	0.31	0.63	0.23	0.13	0.16	0.04	0.12	-0.26
SIN3A	Q96ST3	1_Phospho	S860: Phospho	KHNGVGGsPPKSK; HNGVGGsPPK	-0.02	0.01	-0.07	-0.58	-0.64	-0.1	1.56	1.37	1.66	1.72	1.51	-0.69
PPIG	Q13427	1_Phospho	S397: Phospho	SELNEIKENQRsPVR	0.03	0.09	0.44	0.19	0.17	-0.28	0.18	0.07	0.09	0.12	0.19	0.42
ZNF280C	Q8ND82	1_Phospho	S80: Phospho	SEPHsPGIPEIFR	-0.52	0.04	-0.16	-0.1	0.04	0.1	-0.52	0.03	-0.13	-0.14	0.21	0.19
TACC3	Q9Y6A5	1_Phospho	S25: Phospho	NTENCDFLFsPPEVTGR	0.09	-0.21	0.33	0.39	-0.88	1.08	-0.37	-0.12	-0.45	-0.01	-0.8	0.67
TNKS1BP1	Q9C0C2-2	1_Phospho	S52: Phospho	YESQEPLAGQEsPLPLATR	0.43	-0.44	0.02	-0.54	-0.07	0.7	0.27	-0.37	-0.18	-0.16	-0.52	0.02
SACS	Q9NZJ4-2	1_Phospho	S3514: Phospho	DSAPSTPTsPTEFLTPGLR	-0.19	-0.19	0.18	0.3	0.51	0.2	-0.8	-0.65	-1	-0.2	0.11	0.24
ADCY6	O43306	1_Phospho	S54: Phospho	DAEPPsPTPAGPPR	0.13	0.44	0.82	0.25	0.04	-0.17	-0.06	-0.05	-0.08	-0.43	-0.08	-0.01
PHF3	Q92576-2	1_Phospho	S195: Phospho	AKPVGsPLFK	0.15	-0.12	0.25	0.14	0.16	0.05	0.01	-0.13	-0.07	-0.11	0.11	-0.14
PPIP5K2	O43314	1_Phospho	S1172: Phospho	TAEISSTALRSsPIMR; KTAEISSTALRSsPIMR	-0.02	0.46	0.03	0.35	0.23	-0.24	-0.13	-0.01	-0.18	-0.31	0.01	-0.1
CHD1	O14646-2	1_Phospho		STPEHTWSSR	-0.44	0.42	-0.38	-0.31	-0.61	-0.06	-0.2	-0.12	-0.33	-0.08	-0.72	0.39
PTPN14	Q15678	1_Phospho	S809: Phospho	GASLGPSIsEPDLTSVK; TDPPAVNGASLGPSIsEPDLTSVK	-0.24	-0.05	-0.46	-1.34	-0.06	-0.83	-0.18	0.74	0.36	0.37	-0.2	-0.11
VIM	P08670	2_Phospho	S51: Phospho; S56: Phospho	TYSLGSALRPSTSRsLYASsPGGVYATR; sLYASsPGGVYATR; sLyASsPGGVYATR	0.81	0.91	0.73	0.1	0.83	1.45	0.84	-0.11	0.56	0.3	0.96	0.27
MAP4K4	O95819-2	1_Phospho	T181: Phospho	LVDFGVSAQLDRtVGRR; LVDFGVSAQLDRtVGR	0.49	0.15	0.66	0.28	0.73	-0.23	0.56	0.06	0.49	0.22	0.74	0.04
SCARF2	Q96GP6-2	1_Phospho	S478: Phospho	ELsLGR	0.17	0.34	0.4	0.59	0.31	-0.15	-0.29	0.29	-0.13	0.57	0.26	0.27
ZFYVE20	Q9H1K0	1_Phospho	S548: Phospho	TRsLDFR; sLDFR	-0.14	0.32	-0.1	0.94	0.91	0.05	-0.76	0.73	-0.43	-0.21	0.67	-0.57
FAM63A	Q8N5J2-3	1_Phospho	S489: Phospho	VLsLQGR	0.64	0.33	-0.15	0.27	0.72	-1.18	0.91	0.59	-0.03	0.29	0.48	-0.39
ACTA1	P68133	No Phospho		RGILTLK; GILTLK; DSYVGDEAQSK; IKIIAPPER; AVFPSIVGRPR; DSYVGDEAQSKR; IIAPPERK	-0.25	-0.16	0.14	-0.56	-0.12	0.16	0.06	-0.04	0	-0.08	0.14	0
TJAP1	Q5JTD0-4	1_Phospho	S416: Phospho	EEEELNLPIsPEEER	0.59	0.41	0.72	0.51	0.68	0.74	0.86	-0.64	-0.05	0.62	0.73	-0.42
AHCTF1	Q8WYP5-3	1_Phospho	S2221: Phospho	ESAWsPPPIEIR	-0.13	-0.16	-0.25	-1.31	-0.04	0.03	-0.26	-0.05	-0.38	-0.68	-0.15	0.97
KIAA0947	Q9Y2F5	1_Phospho	S533: Phospho	SELCSsPLGK	-0.01	0.57	0.23	-0.05	0.33	0.1	-0.46	-0.27	-0.02	0.01	-0.07	0.56
MYH10	P35580-2	1_Phospho	S1972: Phospho	RQLHLEGASLELsDDDTESK; QLHLEGASLELsDDDTESK	-0.75	-0.51	-0.1	0	-1.18	-0.97	0.72	0.76	0.71	0.99	0.23	-0.5
LPHN2	O95490-2	1_Phospho	S1374: Phospho	GNsDGYIIPINK	0.15	0.16	0.03	0.77	-0.53	0.04	0.29	0.74	-0.9	0.26	-1.71	0.48
EIF4EBP1	Q13541	1_Phospho	S65: Phospho	NsPVTKTPPRDLPTIPGVTSPSSDEPPMEASQSHLR; FLMECRNsPVTK; KFLMECRNsPVTK	0.1	0.03	0.23	0.07	0.35	0.25	-0.31	0.12	-0.04	-0.07	0.26	0.42
SRSF1	Q07955	3_Phospho	S199: Phospho; S201: Phospho; S205: Phospho	VDGPRsPsYGRsR	0.06	-0.19	-0.61	-0.09	-0.17	0.45	0.41	-0.3	0.25	0.51	0.35	-0.78
FAM21A	Q641Q2-2	2_Phospho	S288: Phospho	SRPTsFADELAAR	-0.33	-0.2	-0.28	-0.22	0.13	0.7	-0.35	-1.53	-0.71	-0.07	0.15	-0.08
SRRM2	Q9UQ35-2	1_Phospho	T1856: Phospho	tSPAPWK	-0.8	0.16	-0.21	-0.16	-0.25	-0.13	-0.09	0.19	-0.4	-0.06	-0.15	-0.09
YAP1	P46937	1_Phospho	S163: Phospho	QsSFEIPDDVPLPAGWEM; QsSFEIPDDVPLPAGWEMAK	-0.67	-1.5	0.11	-1.17	-0.8	0.07	-0.76	-0.55	-0.36	-0.3	-0.42	-0.17
PEG10	Q86TG7-2	1_Phospho	S316: Phospho	SsPAGNSPAPL	0.42	0.5	0.38	0.02	0.21	-0.26	0.08	0.28	0.34	0	-0.2	0.52
VCPIP1	Q96JH7	1_Phospho	S768: Phospho	APYsPTTSK	0.02	0	0.19	-0.04	0.29	-0.1	-0.04	0.3	0.15	-0.06	0.38	0.37
ZNF516	Q92618	1_Phospho	S116: Phospho	ASEGLDACAsPTK	0	0.15	0.28	0.63	0.44	0.12	-0.29	0.5	0.27	0.66	0.25	0.29
BAG3	O95817	1_Phospho	S173: Phospho	SQsPAASDCSSSSSSASLPSSGR	-0.45	-0.21	-1.16	-1.56	-0.81	0.65	0.18	0.31	0.18	-0.13	0.52	-0.02
CCDC86	Q9H6F5	1_Phospho	S58: Phospho	AGLGsPERPPK	0.14	-0.23	0.24	0.16	0.35	0.4	0.02	0.02	0.05	0.36	0.37	0.72
KIAA1462	Q9P266	1_Phospho	S757: Phospho	SLsPSSNSAFSR	0.06	0.48	0.49	0.95	-0.52	-0.57	0.09	0.57	0.47	0.76	-0.69	-0.31
ARID1A	O14497-3	1_Phospho	S1368: Phospho	TLLDPGRFsK	-0.82	-0.16	0.07	0.28	-0.34	0.14	-0.85	0.01	-0.23	0.25	-0.59	0.37
MTMR6	Q9Y217	1_Phospho	S561: Phospho	ELLHSVHPEsPNLK	0.29	-0.24	0.34	-0.28	0.05	-0.08	0.33	-0.21	0.21	-0.42	0.1	0.31
LUZP1	Q86V48	1_Phospho	S905: Phospho	SHsAPSEVGFSDAR; WKSHsAPSEVGFSDAR	0.08	-0.18	-0.23	-0.24	0.4	0.35	0.67	0.81	0.82	0.73	1.18	-0.21
LMO7	Q8WWI1-4	1_Phospho	T1048: Phospho	ISINQtPGK; ISINQtPGKSLDFGFTIK	0.28	0.2	0.53	0.7	-1.05	0.09	0.28	0.27	0.21	0.51	-0.7	0.26
HDLBP	Q00341	1_Phospho	S944: Phospho	EAKDCDPGsPRR; EAKDCDPGsPR; DCDPGsPR	0.03	-0.12	-0.17	-0.16	-0.46	0.23	0.06	-0.54	0.08	-0.24	-0.26	-0.13
PSD3	Q9NYI0	1_Phospho		SHSSPSLNPDTSPITAK; IGSTTNPFLDIPHDPNAAVYK	-0.6	-1.32	-0.91	-0.08	-0.57	-0.02	-0.1	0.02	-0.18	-0.74	0.59	-0.8
SRRM2	Q9UQ35-3	1_Phospho	S255: Phospho	SATRPsPSPER	-0.22	0.29	0	0.27	-0.51	0.12	-0.17	0	-0.21	-0.12	-0.28	0.08
ARHGAP29	Q52LW3	1_Phospho	S519: Phospho	HLNSSQPSGFGPANSLEDVVRLPDSSNKIEEDRCsNSADITGPSFIR; LPDSSNKIEEDRCsNSADITGPSFIR; IEEDRCsNSADITGPSFIR	-0.43	-0.08	0.18	-0.29	0.01	-0.12	-0.24	0.11	0.2	-0.13	0.11	0.17
SNTB2	Q13425	1_Phospho	S395: Phospho	SPsLGSDLTFATR; LVHSGSGCRSPsLGSDLTFATR	0.39	0.24	-0.1	-0.33	0.27	0.03	0.17	0.13	-0.34	-0.12	0.1	0.47
SMARCC1	Q92922	1_Phospho	S310: Phospho	NEEPVRsPERR; NEEPVRsPER; ISTKNEEPVRsPER	-0.68	0	-0.08	-0.16	0.08	-0.8	-0.42	-0.87	-0.03	0.06	-0.46	0.13
KDM5C	P41229	1_Phospho	S317: Phospho	NHsNAQFIESYVCR	0.22	-0.8	-0.27	0.33	0.73	-0.09	0.92	1.17	1.41	1.28	1.42	-1.12
IRF2BPL	Q9H1B7	1_Phospho	S69: Phospho	AHGCFQDGRsPGPPPPVGVK; sPGPPPPVGVK	-0.01	0.16	-0.18	0.01	0.2	-0.69	0.67	0.69	0.7	0.92	0.65	-0.76
BCL9L	Q86UU0	1_Phospho	S21: Phospho	EAPGsPPLSPR	0.32	0.42	0.04	0.57	-0.05	-0.45	0.28	0.58	-0.08	0.39	-0.18	-0.26
TAX1BP1	Q86VP1-3	1_Phospho	S440: Phospho	VPsWGLEDNVVCSQPAR	-1.31	0.09	-0.15	0.05	0.65	-0.24	-0.17	-0.6	-0.95	-0.98	-0.36	0.95
EPHA2	P29317	1_Phospho	S892: Phospho	TLADFDPRVsIRLPSTSGSEGVPFR; TLADFDPRVsIR; VsIRLPSTSGSEGVPFR	0.66	0.47	0.49	-0.04	0.3	-0.6	0.5	0.37	-0.2	-0.34	0.09	0.01
LMO7	Q8WWI1-4	1_Phospho	S895: Phospho	VSAsLPR	0.78	0.42	0.54	0.85	0.24	-0.43	0.75	0.44	0.51	0.57	0.16	-0.04
YRDC	Q86U90	1_Phospho	S60: Phospho	LLRLPGSGAVQAAsPER; LPGSGAVQAAsPER	0.39	-0.02	0.12	-0.49	-0.06	0.54	-0.14	-0.7	-0.12	-0.87	-0.44	0.17
RFX7	Q2KHR2	1_Phospho	S321: Phospho	TPQNVPAsPGGDR	-0.03	0.61	0.09	0.31	0.01	0.49	0.13	-0.26	-0.23	-0.46	0.01	-0.09
SMN1	Q16637-3	2_Phospho	S28: Phospho; S31: Phospho	RGTGQsDDsDIWDDTALIK; GTGQsDDsDIWDDTALIK	-0.22	-0.17	0.1	-0.07	-0.42	-0.07	-0.03	-0.67	0.07	0.06	-0.07	0.08
ASH1L	Q9NR48	1_Phospho	S1748: Phospho	SIDAVIATASAPPSSsPGR	0.31	0.91	0.95	-0.64	-0.14	-0.03	-0.96	-0.51	-0.93	-0.24	-1.13	0.9
SLX4	Q8IY92	1_Phospho	S1044: Phospho	FLLGPPQGGsPR	0.59	0.28	0.43	0.29	0.22	0.04	0.67	0.2	0.47	0.24	0.2	0.22
TRMT112	Q9UI30	1_Phospho		GIPNMLLSEEETES	0.27	0.34	0.24	0.94	0.23	0.45	0.01	-0.56	-1.01	-2.35	0.36	0.18
KANK2	Q63ZY3-3	1_Phospho	S540: Phospho	ERVPsVAEAPQLR; VPsVAEAPQLRPAGTAAAK; ERVPsVAEAPQLRPAGTAAAK	0.14	0.61	0.26	0.17	0.51	-0.66	0.35	0.48	0.22	0.48	0.16	0.08
DEPDC1	Q5TB30	1_Phospho	S110: Phospho	FPATsPLK	-0.09	-0.06	0.98	0.16	-0.07	0.11	-0.36	0.23	0.62	0.1	-0.08	1.09
CFL1	P23528	1_Phospho	S8: Phospho	SGVAVsDGVIK; ASGVAVsDGVIK	0.35	0.75	0.21	0.26	0.52	0.4	0.27	0.74	0.48	0.31	-0.01	-0.08
EIF4G3	O43432	1_Phospho	S495: Phospho	IEVEADGQTEEILDSQNLNSRRsPVPAQIAITVPK; RsPVPAQIAITVPK; sPVPAQIAITVPK	-0.19	-0.07	-0.08	-0.47	-0.63	-0.37	0.31	0.38	-0.01	0.24	-0.49	0.04
ACIN1	Q9UKV3-5	1_Phospho	S561: Phospho	RAsHTLLPSHR	0.39	0.5	-0.1	1.16	0.59	0.17	0.51	0.16	0.4	0	0.18	-0.2
CNN3	Q15417	1_Phospho	S259: Phospho	GMsVYGLGR	0.72	0.13	0.33	0.76	0.69	-0.09	0.14	0.33	0.29	0.93	0.53	-0.05
DAB2IP	Q5VWQ8-4	1_Phospho	S623: Phospho	SLsMVDLQDAR	-0.51	-0.14	-0.14	0.24	-0.43	-0.44	-0.43	0.35	0.45	0.62	-0.15	-0.11
STRIP1	Q5VSL9-2	1_Phospho	S240: Phospho	AAsPPASASDLIEQQQK; AAsPPASASDLIEQQQKR	0.1	-0.01	0.08	-0.33	-0.35	0.24	0.11	0.12	0.13	0.12	-0.15	0.08
SNX17	Q15036	1_Phospho	S336: Phospho	VTSSVPLPSGSTSsPGRGR; VTSSVPLPSGSTSsPGR	-0.23	0.26	0.38	0.12	0.24	-0.03	0.03	0.24	0.22	-0.08	0.3	0.03
EIF4ENIF1	Q9NRA8	1_Phospho	S138: Phospho	SGsPLEK	-0.06	0.07	-0.09	-0.82	0.3	0.04	0.11	0.45	0.29	0.15	0.8	0.28
KHDRBS1	Q07666-3	1_Phospho	S58: Phospho	AsPATQPPPLLPPSATGPDATVGGPAPTPLLPPSATASVK; AsPATQPPPLLPPSATGPDATVGGPAPTPLLPPsATASVK; AsPAtQPPPLL	0.27	0.49	0.63	0.06	0.12	0.07	0.24	0.51	0.12	0.42	0.14	0.37
ARID1A	O14497-3	1_Phospho		VSSPAPMEGGEEEEELLGPK; GPSPSPVGSPASVAQSR; FPPPQELSQDSFGSQASSAPSMTSSK	-0.51	0	0.04	0.02	-0.11	-0.31	-0.64	0.03	-0.37	0	-0.55	0.54
ARHGEF1	Q92888-3	1_Phospho	S878: Phospho	DGDGVPGGGPLsPAR	-0.02	-0.47	-0.91	-0.42	0.23	-0.13	-0.03	-0.62	-0.42	-0.24	0.18	-0.34
DIP2C	Q9Y2E4	1_Phospho	S89: Phospho	YRsDVHTEAVQAALAK	0.09	0.01	-0.43	0.89	0.34	-0.26	-0.02	-0.33	-0.53	0.04	0.16	-0.41
DENND4C	Q5VZ89-3	1_Phospho	S130: Phospho	RSsLYGIAK; SsLYGIAK	0.58	0.16	0.15	0.23	0.09	-0.46	0.34	0.22	0.5	0.26	0.01	0.15
ULK1	O75385	1_Phospho	S638: Phospho	TPsSQNLLALLAR	0.08	0.08	-0.27	-0.1	0.06	-0.14	-0.25	0.27	-0.62	-0.01	-0.16	0.29
PTPN14	Q15678	1_Phospho	S328: Phospho	QPTWSRSsLPR	0.65	0.73	0.05	0.24	0.23	0.07	-0.91	-1.39	-1.21	-1.5	-1.37	-0.27
SIPA1L3	O60292	1_Phospho	S1544: Phospho	TLsDESLCSGRR; TLsDESLCSGR	0.15	-0.24	-0.17	-0.05	-0.23	0.06	0.15	-0.44	-0.08	-0.18	-0.25	-0.13
SRRM1	Q8IYB3-2	3_Phospho	S388: Phospho; S390: Phospho; S392: Phospho	RLsPsAsPPRR; RLsPsAsPPR	-0.01	0.2	0.22	0.06	-0.28	0.6	0.17	-0.73	0.04	0.3	-0.08	0.17
STAC	Q99469	1_Phospho	S56: Phospho	SKsADNFFQR	0.05	0.21	0.64	0.48	0.09	0.57	-0.07	0.17	0.33	0.44	-0.36	0.01
GPRC5C	Q9NQ84	1_Phospho	S403: Phospho	ATANSQVMGsANSTLR	0.14	0.69	-0.21	-0.22	0.33	-0.21	0.6	0.23	0.86	0.48	0.23	0
FUBP1	Q96AE4	1_Phospho	S630: Phospho	QQAAYYAQTsPQGMPQHPPAPQGQ; AQTsPQGMPQHPPAPQGQ	0.01	-0.11	0.09	0.23	-0.11	0.16	-0.01	-0.12	-0.1	-0.24	0.12	-0.01
CLIP2	Q9UDT6	1_Phospho	S294: Phospho	IGFPSTsPAK	0.15	0.03	-0.01	-0.15	0.35	-0.1	-0.04	-0.21	-0.36	0.02	0.29	0.43
ZNF638	Q14966	1_Phospho	S128: Phospho	QSSVTQVTEQsPK	0.37	0.12	0.13	0.55	0.28	0.03	0.01	-0.35	0.09	0.15	-0.05	-0.16
KRBA1	A5PL33-3	1_Phospho	S253: Phospho	ADLGPGsPPWAVK	-0.4	-0.46	0.03	-0.18	0.31	0.54	-0.46	-0.17	-0.04	0.31	0.23	-0.04
SRRM1	Q8IYB3-2	1_Phospho	S595: Phospho	RYsPPIQR	0.13	0.06	0.17	0.14	-0.12	0.14	0.07	-0.01	0.06	0.01	-0.15	0.09
RBM15B	Q8NDT2	2_Phospho	S265: Phospho; S267: Phospho	QRsLsPVAAPPLREPR; QRsLsPVAAPPLR; sLsPVAAPPLREPR	-0.2	0.15	-0.4	-0.08	0.02	0.3	0.45	-0.34	0.26	0.08	0.04	-0.41
YLPM1	P49750	1_Phospho	S1060: Phospho	FSAPPSRsHDGDR	-0.02	0.07	-0.01	0.2	0.02	0.17	0.35	0.21	0.52	0.29	0.47	-0.53
EXOSC9	Q06265-3	1_Phospho	S222: Phospho	APIDTsDVEEK	-0.36	0.05	0.32	0.08	-0.36	-0.14	-0.14	0.26	0.02	0.07	0.02	0.64
BRD8	Q9H0E9-4	1_Phospho	T264: Phospho	AtPPPSPLLSELLK; AtPPPSPLLSELLKK	0.38	0.65	0.46	-0.25	0.04	-1.89	-0.16	0.46	-0.3	0.21	-0.15	0.76
CENPO	Q9BU64	1_Phospho	S297: Phospho	LDMsLVS	0.16	0.13	-0.05	-0.08	-0.21	0.13	-0.07	-0.01	-0.12	-0.11	-0.11	0.66
SEC62	Q99442	1_Phospho	T158: Phospho	EETPGtPK; KEETPGtPK	0.01	0.55	0.68	-0.09	-0.07	-0.2	-0.02	0.6	-0.37	0.1	-0.11	0.95
INO80B	Q9C086	2_Phospho	S127: Phospho; S132: Phospho	AWLDEDsNLSPsPLR	-0.54	-0.43	-0.28	-0.15	-0.95	-0.76	-1.26	0.13	0.47	-0.82	-0.32	0.36
NOP56	O00567	2_Phospho	S569: Phospho; S570: Phospho	FSKEEPVssGPEEAVGK; EEPVssGPEEAVGK; KFSKEEPVssGPEEAVGK	0.15	0.55	0.22	0.51	0.48	0.99	-0.17	-0.09	0.13	0.12	0.03	0.42
CAPRIN2	Q6IMN6	1_Phospho	S566: Phospho	HSLTSQSQIsPK	0.89	-0.29	-0.34	-0.17	0.81	-0.38	0.58	0.04	0.55	0.09	0.26	-0.38
DPYSL3	Q14195-2	1_Phospho	T638: Phospho	GSPtRPNPPVR	0.08	0.57	0.95	0.18	-0.08	-0.43	0.07	0.17	0.51	-0.71	-0.21	0.38
MYBBP1A	Q9BQG0-2	1_Phospho	S1303: Phospho	ARLsLVIR	1.01	0.47	0.41	0.59	1.2	0.45	0.57	0.33	0.71	0.8	0.71	-0.02
SCEL	O95171-2	1_Phospho	S369: Phospho	GQsLDNLIK	-0.05	-0.87	1.36	-0.03	0.35	0.61	-0.06	-0.31	1.14	-0.38	0.44	0.68
SRRM2	Q9UQ35-2	2_Phospho	S778: Phospho	sLSGSSPCPK	-0.45	-0.14	-0.07	-0.06	-0.2	0.33	-0.14	-0.15	-0.25	0.28	-0.03	0.08
ZNF295	Q9ULJ3-2	1_Phospho	S411: Phospho	SFsASQSTDR; SFsASQSTDREGASPVTEVR	-0.15	-0.11	-0.87	0.04	0.2	0.1	-0.39	-0.61	-0.32	-0.5	-0.05	-0.94
NCL	P19338	1_Phospho	T99: Phospho	TVtPAK	-0.1	-0.23	0.41	-0.23	-0.56	0.54	-0.53	-0.33	0.13	0.01	-0.17	0.5
SRRM2	Q9UQ35-3	2_Phospho	S255: Phospho; S257: Phospho	SATRPsPsPER	-0.42	-0.58	0.16	0	-0.59	1.79	0.43	-0.09	0.49	0.6	0.46	-0.27
TMPO	P42167-2	1_Phospho	T74: Phospho	EPtPVLGSGAAAAGR; GPPDFSSDEEREPtPVLGSGAAAAGR	-0.02	1.02	0.25	0.07	0.32	-0.87	0.37	0.25	-0.64	-0.01	-0.65	0
SRRT	Q9BXP5-2	1_Phospho	S540: Phospho	TQLWAsEPGTPPLPTSLPSQNPILK; TQLWAsEPGTPPLPtSLPSQNPILK; TQLWAsEPGTPPLPTSLPSQN	-0.09	-0.58	-0.13	-1.06	0.25	0.04	-0.05	0.21	0.08	0.46	-0.01	0.19
RTN4	Q9NQC3-2	1_Phospho	S181: Phospho	RGsSGSVVVDLLYWR; GsSGSVVVDLLYWR	2.46	2.78	2.31	3.48	0.82	-0.69	0.97	0.97	0.97	0.84	-0.94	-0.14
NHSL1	Q5SYE7-2	1_Phospho	S190: Phospho	sLIYTDTLVR	0.64	-1.1	-0.22	-1.06	-0.83	-0.23	0.89	-1.32	-0.88	-1.08	-1.09	-0.08
MELK	Q14680-4	1_Phospho	S205: Phospho	LSsFSCGQASATPFTDIK	0.1	0.44	-0.52	-0.16	0.48	0.52	0.14	-0.08	0.4	0.24	0.14	-0.37
MAP7D3	Q8IWC1	1_Phospho	S461: Phospho	TSLEASMEAsPK	-0.19	0.02	0.2	0.11	-0.12	0.11	-0.11	-0.59	0.08	-0.21	0.15	0.25
GEM	P55040	1_Phospho	S23: Phospho	WsIPADGR; QGTVGMQPQQQRWsIPADGR	1.18	0.48	0.4	0.06	1.42	-0.88	1.06	0.45	0.07	0.23	1.06	-0.18
CDK3	Q00526	2_Phospho	T14: Phospho; Y15: Phospho	IGEGtyGVVYK	-0.28	-0.17	0.39	0.45	0.15	0.27	-0.3	-0.17	0.21	0.28	-0.05	0.32
ANLN	Q9NQW6-2	1_Phospho	S182: Phospho	AAsPPRPLLSNASATPVGRR; AAsPPRPLLSNASATPVGR; AAsPPRPLL; AAsPPRPLLSNASAtPVGR	0.08	0.26	0.34	0.28	0.25	0.56	-0.15	-0.04	0.21	-0.02	-0.05	0.34
AHCTF1	Q8WYP5-3	1_Phospho	S1550: Phospho	NLsFNELYPSGTLK	0.03	-0.3	-0.1	0.13	-0.21	0.05	-0.09	0.18	0.42	0.11	-0.02	-0.07
RBBP6	Q7Z6E9-2	1_Phospho	T1434: Phospho	ASSNKDFtPNR	0.04	0.31	0.09	-0.32	-0.26	-0.05	0.33	0.18	-0.05	-0.28	0.2	0.39
MAP1S	Q66K74	2_Phospho	T638: Phospho; S640: Phospho	ALELPLAASSIPRPRtPsPESHR; ALELPLAASSIPRPRtPsPESHRSPAEGSER; tPsPESHRSPAEGSER	0.38	0.58	0.66	0.35	0.88	0.31	0.44	0.41	0.84	0.16	0.74	-0.53
SCAF11	Q99590	2_Phospho	S816: Phospho; S818: Phospho	KRPQsPsPR	0.12	0.06	0.54	0.12	0.01	0.38	-0.08	-0.37	-0.05	0.32	-0.11	0.37
TBC1D15	Q8TC07	1_Phospho	S675: Phospho	NDsPTQIPVSSDVCR	0.06	0.16	-0.64	0.04	0.32	0.2	0.11	0.55	0.73	-0.48	-0.71	-0.79
SH2B3	Q9UQQ2	1_Phospho	S121: Phospho	SsEELAPPRPPGPCSFQHFR	-0.88	-0.41	-0.13	-1.51	0.23	-0.7	-0.07	0.03	-1.13	-0.5	-0.26	0.01
LRRC16A	Q5VZK9-2	1_Phospho	S1315: Phospho	SNDsGEEAEKEFIFV	-0.64	-0.64	-1.04	-0.96	-0.23	-0.39	0.03	-0.31	0.35	-0.25	0	-1.13
EIF4G1	Q04637	1_Phospho	S1231: Phospho	EAALPPVsPLKAALSEEELEKK; EAALPPVsPLK; EAALPPVsPLKAALSEEELEK	0.11	-0.23	-0.06	-0.24	0.18	-0.11	0.4	0.01	-0.06	0.04	0.42	1.44
SIPA1L1	O43166-2	1_Phospho	S1412: Phospho	HSAsPVVFTSAR	0.17	0.31	0.33	0.08	0.26	-0.23	0.13	0.48	0.45	0.79	0.3	-0.21
SLC4A4	Q9Y6R1-4	1_Phospho	S985: Phospho	sPTFLER; ERsPTFLER	0.15	0.45	0.41	0.37	-1.15	-0.41	0.16	0.49	-0.44	0.2	-1.21	0.16
CAMSAP2	Q08AD1-2	1_Phospho	S1292: Phospho	SESVEGFLsPSR	-0.07	-0.84	0.12	0.01	0.49	0.42	-0.16	-1.04	0.06	-0.04	0.37	0.37
POGZ	Q7Z3K3-5	1_Phospho	S1269: Phospho	LSGEHsESSTPRPR	0.14	0.4	-0.1	0.36	0.16	0.06	0.08	-0.17	-0.06	-0.09	-0.06	-0.16
SRRM2	Q9UQ35-2	1_Phospho	T1043: Phospho	SStPPGESYFGVSSLQLK	-0.09	0.03	-0.6	0.18	-0.21	0.14	0.06	0	-0.01	0.25	-0.2	-0.53
LYSMD2	Q8IV50	1_Phospho	S33: Phospho	SGsESEEAELSLSLAR	-0.21	0.28	-0.41	0.17	0.16	0.01	-0.38	0.02	-0.24	0.13	-0.05	-0.3
SCARF1	Q14162	1_Phospho	S714: Phospho	HFGsFQK; HFGsFQKGQAEAK	-0.48	-0.96	-0.22	-0.87	0.42	-0.24	-0.62	-1.1	-0.4	-1.23	0.42	-0.55
SYNRG	Q9UMZ2-6	1_Phospho	S869: Phospho	SLsLGDKEISR; SLsLGDK	0.63	-0.13	0.14	0.43	-0.02	-0.2	0.58	0.22	0.17	0.29	-0.11	-0.06
RBM12B	Q8IXT5	1_Phospho	S839: Phospho	CPsDEDFR; SPQEEDFRCPsDEDFR	-0.03	0.25	0	0.2	0.12	-0.08	0.05	0	0.19	0.28	-0.11	0.51
PDPK1	O15530-4	1_Phospho	S114: Phospho	ANsFVGTAQYVSPELLTEK	-0.31	0.34	-0.72	0.4	0.11	-0.19	-0.5	0.08	-0.21	-0.05	0.03	-0.71
EEF1D	P29692-3	1_Phospho	S95: Phospho	LNVLEKSsPGHR	0.23	0.35	0.53	0.3	0.36	0.82	0.28	0	0.25	-0.24	0.28	0.36
MYH10	P35580-2	1_Phospho	S1955: Phospho	GGPISFSSsR	0.77	0.53	0.49	0.77	0.2	-0.34	0.1	-0.26	0.25	0.35	-0.02	0.35
FIP1L1	Q6UN15	1_Phospho	S259: Phospho	AEFTsPPSLFK	0.02	-0.48	0.14	-0.17	0.06	0.41	-0.22	-0.41	0	-0.38	0.03	0.53
CEP170	Q5SW79-2	No Phospho		FNPDGEEEDVTVQE	-0.07	0.31	-0.15	-0.05	-0.57	-0.81	-0.6	-0.32	-1.19	-1.21	-1.37	0.41
BAHCC1	Q9P281	1_Phospho	S1110: Phospho	TFLPGEPPPCsPR	-0.05	-0.16	-0.01	0.12	-0.33	0.21	-0.09	0.04	-0.56	-0.1	0.13	0.23
PAK4	O96013-3	1_Phospho		RKSLVGTPYWMAPELISR	0.25	0.18	0.15	0.09	-1.05	0.07	0.25	-0.09	-0.23	-0.16	-1.94	0.21
ANKRD11	Q6UB99	1_Phospho	S834: Phospho	FSLsDDQR; FSLsDDQRDR	0.12	0.29	-0.05	-0.27	0.3	-0.08	0.1	0.14	-0.23	-0.2	0.25	0.32
PTPN13	Q12923-3	2_Phospho	S1029: Phospho; S1033: Phospho	SVAsLNRsPER; SVAsLNRsPERR	-0.91	0.26	-0.03	0.09	-1.19	-0.43	-0.67	0.13	0.12	0.33	-1.15	-0.32
GFPT1	Q06210-2	1_Phospho	S243: Phospho	VDsTTCLFPVEEK	0.13	-0.07	-0.79	-0.22	-0.43	0.12	0.13	0.05	-0.5	-0.19	-0.28	-0.44
SRRM2	Q9UQ35	1_Phospho		NHSGSRTPPVALNSSR; TPAALAALSLTGSGTPPTAANYPSSSR; TSPPLLDR; VSGRTSPPLLDR; MGQAPSQSLLPPAQDQPRSPVPSAFSDQSR; MSCFSRPSMSPTPLDR	0.4	0.24	0.24	-0.12	0.13	1.47	0.02	0.28	-0.46	0.61	0.37	-0.27
PI4K2A	Q9BTU6	2_Phospho	S47: Phospho; S51: Phospho	VAAAAGSGPsPPGsPGHDR; VAAAAGSGPsPPGsPGHDRER	-0.48	0.04	0.2	0.02	0.09	-0.43	0.53	0.28	-0.01	0.55	0.03	0.09
AKAP5	P24588	1_Phospho	S81: Phospho	GAWAsLK; GAWAsLKR	-0.36	-0.27	0.32	0.47	-0.49	0.02	-0.45	-0.09	0.66	0.82	-0.22	0.46
KLHL22	Q53GT1	1_Phospho	T605: Phospho	SLLLEPPRGtPDR	0.31	-0.14	0.49	0.46	-0.24	0.64	-0.08	0.41	0.13	0.05	-0.29	0.35
TNS1	Q9HBL0	1_Phospho	T1105: Phospho	tPTQPLLESGFR; SFPSGESSDQGPRtPTQPLLESGFR	-1.55	-0.36	-0.44	-1.81	-0.64	-0.04	-1.41	-0.07	-1.23	-0.89	-0.37	0.22
ELK3	P41970	1_Phospho	S396: Phospho	AAsPVLLSSNSQK	-0.57	-0.4	-0.19	-0.33	-0.21	0.07	-0.74	0.1	-0.22	-0.04	-0.02	-0.25
ZBED4	O75132	1_Phospho	S624: Phospho	TEVSETARPSsPDTR	0.1	0.19	-0.12	-0.33	-0.38	-0.07	0.17	-0.48	-0.37	-0.23	-0.55	1.13
ZC3H18	Q86VM9	2_Phospho	S532: Phospho; S534: Phospho	KKLGVsVsPSR; LGVsVsPSR	0.61	-0.09	0.16	0.15	-0.14	0.52	0.4	-0.07	0.26	0.1	0.08	0.18
NHS	Q6T4R5-3	1_Phospho	S833: Phospho	LAsPEK	-0.17	-0.26	0.82	-0.13	-0.83	-0.3	-0.2	-0.27	0.53	0.48	0.04	0.26
RGPD3	A6NKT7	1_Phospho		YSPKTPPRWAEDQNSLLK; SSTPRESPCGK	0.29	0.4	0.02	0.47	0.07	0.17	-0.21	-0.07	-0.39	-0.15	0.04	0.33
GPRIN1	Q7Z2K8	1_Phospho	S862: Phospho	DAGLQVsLGAAETR	-0.15	-0.05	0.71	-0.12	0.72	-0.03	-0.6	-0.36	0.16	0.18	0.39	0.72
PTMA	P06454	1_Phospho	S9: Phospho	SDAAVDTsSEITTK	0.09	-0.2	0.42	0.09	-0.47	0.36	-0.45	-1.08	-0.41	-0.92	-1.12	0.27
TLN1	Q9Y490	1_Phospho	S620: Phospho	GLAGAVsELLR	-0.33	-0.52	-0.23	-0.2	-0.94	-0.15	-0.38	-0.29	-0.79	-0.76	-1.56	0.03
ERCC6L	Q2NKX8	1_Phospho	S1098: Phospho	sLINMVLDHVEDMEER	0.06	0.47	-0.24	-0.8	-0.19	1.48	-0.62	-0.02	0.2	0.18	-0.15	-0.2
SH3BP4	Q9P0V3	1_Phospho	S44: Phospho	VPSPsALLVDNPTPFGNAK	-0.89	-0.98	-0.16	-0.62	-1.6	0.39	0.02	-0.71	-0.27	0	-0.69	1.3
GLI4	P10075	1_Phospho	S86: Phospho	sPGSQAPDEGAGGALR	-0.28	-0.22	-0.2	-0.38	-0.44	-2.35	-0.98	0.02	-0.91	-0.59	-0.8	1.09
CDCA5	Q96FF9	2_Phospho	S75: Phospho; S79: Phospho	IVAHAVEVPAVQsPRRsPR	-0.24	-1.71	0.65	0.18	-0.97	0.33	-0.98	-1.01	-0.01	-0.63	-1.14	0.19
OTUD4	Q01804	1_Phospho	S442: Phospho	ESNYFGLsPEER	0.19	-0.48	0.43	0	0.08	-0.34	0.26	-0.22	-0.06	0.79	0.09	-0.27
NUP214	P35658-2	1_Phospho	S635: Phospho	SSVLPsPSGR	0.12	0.09	0.08	-0.07	0.17	0.13	-0.27	-0.12	-0.78	-0.58	-0.28	0.2
ABLIM1	O14639	1_Phospho	S452: Phospho	STsQGSINSPVYSR	-1.05	0.25	-0.63	-0.56	-1.68	0.19	-0.29	0.45	-0.16	-0.58	-0.57	0.04
RPLP1	P05386-2	2_Phospho	S76: Phospho; S79: Phospho	KEEsEEsDDDMGFGLFD; EEsEEsDDDMGFGLFD	-0.05	-0.03	0.08	0.05	-0.05	0.13	0.14	-0.38	0.16	0.11	0.27	0.1
KIF13B	Q9NQT8	1_Phospho	S1391: Phospho	LSGsRQDLIPSYSLGSNK	0.35	-0.88	0.51	-0.76	-0.43	-0.34	-0.67	-0.09	0.45	-0.53	-0.39	-0.29
FAM21C	Q9Y4E1-4	1_Phospho	S1054: Phospho	GPIAQWADGAIsPNGHRPQLR	-0.33	0.14	0.07	0.09	0.01	0.43	-0.25	-0.41	-0.42	-0.23	-0.28	0.23
TMPO	P42166	1_Phospho	S351: Phospho	SHISDQsPLSSK; SHISDQsPLSSKR	0.34	-2.28	-0.9	-0.03	-0.08	0.35	0.71	0.77	1.1	0.54	0.72	-0.64
CENPN	Q96H22	1_Phospho	S282: Phospho	SGLNGsILAER	0.04	-0.26	0.03	0.25	-0.32	0.14	0.18	-0.34	-0.14	0.21	-0.4	0.23
ARHGEF17	Q96PE2	1_Phospho	S142: Phospho	RPsADSESPGTPSPDGAAWEPPAR	0.29	0.44	-0.37	-0.14	0.25	-0.04	0.4	0.61	0.46	0.34	-0.02	0.4
EPS8L2	Q9H6S3	1_Phospho	S466: Phospho	NSQKHSPTsEPTPPGDALPPVSSPHTHR	-0.97	0.66	-0.62	0.21	-0.82	1.14	0.02	0.39	0.25	-0.12	-1.52	-0.11
KIF1B	O60333-3	1_Phospho	S1141: Phospho	QFsAPNLK; RQFsAPNLK	0.28	0.04	0	0.49	-0.23	0.63	0.12	0.43	0.01	0.35	-0.24	0.28
CLK3	P49761-3	2_Phospho	S76: Phospho; S78: Phospho	CEERsPsFGEDYYGPSR	-0.76	-0.48	-0.23	-0.25	-0.14	1.1	0.1	-1.16	0.22	0.13	0.24	-0.05
KIF23	Q02241	1_Phospho	S867: Phospho	YMLTHQELAsDGEIETK	-0.28	-0.13	-0.34	-0.17	-0.48	0.69	0.04	0.07	0.1	0.13	-1.26	0.7
RBM12	Q9NTZ6	1_Phospho	S424: Phospho	SRsPHEAGFCVYLK; sPHEAGFCVYLK	-0.67	0.48	0.19	-0.23	-0.21	-0.08	-0.39	-0.6	-1.32	-0.31	-0.69	0.91
CEP250	Q9BV73-2	1_Phospho	S2173: Phospho	LHsPGATSTAELGSR	-0.31	-0.72	-0.54	-0.73	-0.24	-0.06	0.73	0.79	0.5	0.68	0.63	-0.54
CDC42EP1	Q00587-2	1_Phospho		LSPVGWVSSSQGK; APQAGSRTPVPSTVQANTFEFADAEEDDEVKV; SDSLLSFR; GGDVFGDTSFLSNHGGSSGSTHR; ASWESLDEEWRAPQAGSR	-0.59	-0.44	-0.82	0.15	0.21	-0.38	0.36	0.22	-0.73	-0.22	-0.7	0.1
MICAL3	Q7RTP6	1_Phospho	S1221: Phospho	AVHsPIR	-0.21	0.19	-0.59	0.48	0.09	0.28	0.02	-0.06	0.05	0.02	-0.48	-0.52
CIT	O14578-4	1_Phospho	S2013: Phospho	DKsPGRPLER	0.07	0.07	0.41	-0.18	-0.05	0.14	-0.42	-0.12	-0.02	-0.88	-0.56	0.22
SRRM1	Q8IYB3-2	1_Phospho	S694: Phospho	APQTSSsPPPVRR; APQTSSsPPPVR	0.1	-0.01	0.1	0.09	-0.11	0.06	-0.23	-0.26	-0.29	-0.19	-0.53	0.19
PARVA	Q9NVD7	2_Phospho	S14: Phospho; S19: Phospho	sPTPKsPPSR; SPSVPKsPTPKsPPSR	-0.68	0.3	-0.18	-0.04	-0.21	0.1	-0.05	0.09	0.04	0.21	0.02	0.07
CD2BP2	O95400	1_Phospho	S195: Phospho	KGPGQPSsPQR; KGPGQPSsPQRLDR	-0.16	-0.08	0.09	-0.36	-0.12	0.1	-0.06	-0.25	-0.22	-0.39	-0.21	0.24
EEF1D	P29692-3	1_Phospho		ATAPQTQHVSPMR; ATAPQTQHVSPMRQVEPPAK	0.36	-0.77	0.6	0.3	0.27	0.66	0.35	-0.13	-0.41	-0.36	0.43	-0.04
ZNF106	Q9H2Y7	1_Phospho	S1026: Phospho	ATGDGSsPELPSLER	-0.29	-0.66	-0.23	-0.14	-0.18	0.09	-0.14	-0.04	-0.33	-0.16	-0.2	0.17
RBM3	P98179	1_Phospho	S147: Phospho	NQGGYDRYsGGNYR	0.11	0.01	0.03	0.05	0.13	0.03	-0.21	-0.08	-0.43	-0.28	-0.07	0.05
CDC16	Q13042-2	1_Phospho	S559: Phospho	NIIsPPWDFR	-0.22	-0.44	-0.2	-0.56	0.1	0.18	-0.08	-0.37	0.03	-0.38	0.13	0.38
FNBP1L	Q5T0N5-4	1_Phospho	S295: Phospho	TIsDGTISASK	-0.52	-0.91	-0.35	-0.77	-0.53	-0.28	-0.18	-0.46	-0.06	-0.41	-0.43	-0.09
RSL1D1	O76021	1_Phospho		FFTTPSK; ATNESEDEIPQLVPIGK	-0.25	-0.26	-0.33	-0.1	0.06	1.29	-0.59	-0.63	-0.5	-0.6	-0.34	1.33
PRPSAP1	Q14558-2	1_Phospho	S244: Phospho	LGLAVIHGEAQCTELDMDDGRHsPPMVK	-0.07	0.81	0.26	1.29	0.81	-0.1	-0.51	0.37	0.15	0.09	0.16	0.12
MAP3K2	Q9Y2U5	1_Phospho	S153: Phospho	KRLsIIGPTSR; RLsIIGPTSR	0.4	0.15	0.4	0.4	0.22	-0.33	0.74	0.57	0.84	0.95	0.8	0.21
CDC42EP4	Q9H3Q1	1_Phospho	S292: Phospho	AGPDLPSLPSHALEDEGWAAAAPsPGSAR	0.3	-0.85	-0.21	0.45	-0.48	-0.45	-0.36	0.65	0.3	0.02	0.47	0.19
PGAM4	Q8N0Y7	1_Phospho	S118: Phospho	RsYDVPPPPMEPDHPFYSNISKDR; sYDVPPPPMEPDHPFYSNISKDR; RsYDVPPPPMEPDHPFYSNISK; IWRRsYDVPPPPMEPDHPFYSNISK; sYDVPPPPMEPDHPFYSNISK	0.66	0.33	0.06	1.04	0.85	0.2	0.59	0.51	0.48	0.61	0.77	-0.18
SRRM2	Q9UQ35	2_Phospho	S2032: Phospho; T2034: Phospho	sRtPLLPR	-0.45	0.1	-0.89	0.44	-0.19	0.7	-0.46	-1.06	-0.29	-0.03	0.07	-0.78
CDK7	P50613	2_Phospho	S164: Phospho; T170: Phospho	SFGsPNRAYtHQVVTR	0.3	0.35	0.17	0.27	0.12	0.58	0.09	-0.38	0.31	0.05	0.18	-0.2
KDM3A	Q9Y4C1	1_Phospho	S325: Phospho	QQSTPQAANsPPNLGAK	0.01	-0.4	0.09	0.2	0.41	-0.29	-0.17	0.39	0.75	0.41	0.74	-0.12
RHBDF1	Q96CC6	1_Phospho	S346: Phospho	LRQEVVsTAGPR; QEVVsTAGPR	1.76	1.26	0.45	1.15	1.33	-0.4	0.91	0.59	-0.14	0.71	0.85	0.16
EIF4ENIF1	Q9NRA8	1_Phospho		SSSLGSTPHEELER; SSSPVGLAK; ASEENLLSSSSVPSADRDSSPTTNSK	0.34	-0.19	-0.88	0.16	-0.05	0.24	-0.1	0.46	0.5	0.15	0.11	-0.97
MARCKSL1	P49006	1_Phospho	S22: Phospho	GDVTAEEAAGAsPAK; GDVTAEEAAGAsPAKANGQENGHVK	-0.22	-0.42	-0.12	-0.44	-0.14	-0.09	-0.3	-0.24	-0.5	-0.3	-0.19	0.24
ZNF135	P52742	1_Phospho	S308: Phospho	SFsFR	0.06	0.39	-0.37	-0.03	-0.11	-0.1	-0.08	0.31	0.03	-0.1	-0.2	-0.4
FAM21B	Q5SNT6	1_Phospho	S600: Phospho	TQRVsLLFEDDVDSR; VsLLFEDDVDSR	0.42	0.51	0.34	0.18	-0.09	0.14	0.21	0.35	0.11	0.43	0.25	0.52
EIF4ENIF1	Q9NRA8	2_Phospho	S342: Phospho; S345: Phospho	WFsNPsR	0.32	0.51	-0.39	-0.35	0.05	1.94	0.68	0.16	0.46	-0.21	0.32	0.25
DSN1	Q9H410-2	1_Phospho	S264: Phospho	SMQQLDPsPAR; SMQQLDPsPARK	-0.16	0.04	-0.2	-0.03	-0.28	0.03	0.07	-0.12	-0.37	0.09	0.09	0.08
FLNC	Q14315	1_Phospho	S1527: Phospho	YADQEVPRsPFK	-1.81	-1.53	-1.24	-1.12	-1.04	0.76	-1.91	-1.86	-0.66	-1.29	-0.9	-0.11
TSC2	P49815-2	1_Phospho	S1368: Phospho	ADVGRLsPEVK	0.24	-0.07	-0.26	-0.21	-0.48	-0.57	0.34	0.28	0.09	0	-0.01	-0.07
MICALL1	Q8N3F8	1_Phospho	S471: Phospho	SLHPWYGITPTSsPK	-0.32	-0.09	-0.79	-1.08	-0.4	0.01	0.1	0.28	0.45	-0.37	0.28	-0.54
FAM129A	Q9BZQ8	1_Phospho	S602: Phospho	RAsAILPGVLGSEtLSNEVFQESEEEKQPEVPSSLAK; RAsAILPGVLGSETLSNEVFQESEEEKQPEVPSSLAK	0.65	-1.32	0.54	0.28	0.25	0.08	0.9	0.3	0.3	-0.18	-0.03	-0.55
PI4KB	Q9UBF8	1_Phospho	S428: Phospho	sVENLPECGITHEQR	0.26	0.19	0.1	-0.1	0.06	0.49	0.25	0.09	0.15	-0.24	-0.23	0.23
HDAC7	Q8WUI4-8	1_Phospho	S237: Phospho	KEsAPPSLR	0.24	0.16	0.21	0.04	0.26	-0.12	-0.05	0.62	0.05	-0.19	0.13	0.4
CDK11A	Q9UQ88-4	1_Phospho	S258: Phospho	DLLSDLQDIsDSER	0.05	-0.07	0.08	0.09	-0.48	-0.27	0.19	0.05	-0.14	0.26	-0.21	0.63
LARP1	Q6PKG0-3	1_Phospho	T299: Phospho	FDGVEGPRtPK; KFDGVEGPRtPK	0.02	-0.31	-0.59	-0.39	0.53	-0.06	-0.1	0.13	0.21	-0.32	0.55	-0.45
SRRM2	Q9UQ35-2	1_Phospho	T2165: Phospho	VPSPtPAPK	-0.73	0.34	-0.18	-0.01	-0.35	-0.34	-0.27	0.23	-0.7	0.03	-0.53	0.65
SRRM2	Q9UQ35-2	2_Phospho	S857: Phospho; T866: Phospho	QGSITsPQANEQSVtPQRR; QGSITsPQANEQSVtPQR	-0.37	-0.06	-0.37	-0.25	-0.38	0.51	-0.36	-1.1	-0.3	0.1	-0.13	0.5
CTTN	Q14247	1_Phospho	S418: Phospho	LPSsPVYEDAASFK; LPSsPVYEDAAsFK; TQTPPVSPAPQPTEERLPSsPVYEDAASFK; AKTQTPPVSPAPQPTEERLPSsPVYEDAASFK	-0.01	-0.33	-0.01	-0.21	0.18	-0.27	0.07	-0.03	-0.27	-0.03	0.23	0.38
ZNF609	O15014	1_Phospho	S467: Phospho	TNsMGSATGPLPGTK	0.08	-0.24	-0.67	0.05	-0.2	0.13	0.5	0.74	0.17	0.66	0.65	0.11
AHNAK	Q09666	2_Phospho	S212: Phospho; S216: Phospho	TVIRLPSGsGAAsPTGSAVDIR; TVIRLPSGsGAAsPtGSAVDIR; LPSGsGAAsPTGSAVDIR; LPSGsGAAsPtGSAVDIR	-0.13	0.57	0.43	0.01	0.2	0.1	0.18	0	0.19	-0.14	0.23	-0.12
PTPN14	Q15678	2_Phospho	S594: Phospho	HKYVSGSsPDLVTR; YVSGSsPDLVTR; HKYVSGSsPDLVTRK	-0.78	0.56	0.39	0.12	-0.01	-0.16	-0.3	0.01	0.74	-0.47	0.58	-1.32
TRAF3IP1	Q8TDR0	1_Phospho	S476: Phospho	RQDsMEALQMDR; QDsMEALQMDR	0.13	0.14	-0.13	0.02	0.02	0.11	-0.49	-0.27	-0.44	-0.38	-0.38	-0.18
SYNPO	Q8N3V7-2	1_Phospho	S804: Phospho	MRsPQPARPGSAAVPGAAFAPIPR	-0.11	0.61	0.66	0.8	0.69	0.29	-0.88	-0.47	-1.06	-0.56	-0.04	0.44
BCLAF1	Q9NYF8	1_Phospho	S268: Phospho	NTPSQHSHSIQHsPER; NTPsQHSHsIQHsPER; NTPsQHSHSIQHsPER; NtPSQHSHSIQHsPER	0.07	0.42	-0.31	0.2	0.05	0.43	-0.04	-0.1	-0.22	0.21	0.29	-0.13
PLEKHG3	A1L390-2	2_Phospho	S173: Phospho; S176: Phospho	SSsVLsLEGSEK	-0.93	-0.22	-0.18	-0.21	-0.01	0.4	-1.05	-1.27	0.15	-1.12	-0.29	-0.27
CTAGE5	O15320	1_Phospho	S596: Phospho	APSDTGSLsPPWDQDRR	0.81	1.17	0.75	0.23	0.37	0.19	0.49	0.31	-0.58	-0.16	-0.89	2.13
PLEKHA5	Q9HAU0	1_Phospho	T438: Phospho	GVISYQtLPR	0.18	-0.03	0.48	0.12	0.25	-0.43	0.27	0.3	0.47	0.24	0.29	-0.29
TMPO	P42167	1_Phospho	S250: Phospho	GGPLQALTREsTR	1.17	0.31	0.55	1.06	0.56	-0.51	0.05	-0.09	0.04	-0.24	-0.05	0.1
WNK4	Q96J92	1_Phospho	S64: Phospho	RSsVDLGLLSSW; SsVDLGLLSSW	0.51	0.14	-0.08	-0.22	0.48	1.74	-0.11	0.35	-0.54	-0.16	-0.81	1.99
SPRY2	O43597	2_Phospho	S139: Phospho; S142: Phospho	LLGSsFSsGPVADGIIR	0.71	0.91	1.3	0.6	0.72	0.76	0.55	-0.84	-0.03	-0.17	0.84	0.05
F2R	P25116	1_Phospho	S418: Phospho	MDTCSSNLNNsIYKK; MDTCSSNLNNsIYK	-0.13	0.48	-0.26	1.01	0.28	-0.02	-0.19	0.6	-0.03	0.83	-0.09	-0.19
SH3BP5L	Q7L8J4	1_Phospho	S362: Phospho	GLSDHVsLDGQELGTR	0.32	0.5	0.48	0.34	0.12	0.07	0.43	0.56	0.27	0.59	0.26	0.17
ANKRD26	Q9UPS8-2	1_Phospho	S188: Phospho	ESVNsPVFGK	-0.54	-0.03	0.34	-0.04	-0.17	-0.43	-0.4	0.43	0.16	0.21	-0.11	0.25
SMARCA1	P28370-2	1_Phospho	T118: Phospho	SPtSPLNMK	-0.06	0.16	0.13	0.05	0.09	0.34	-0.19	0.16	0.18	-0.07	0.15	0.21
PPP1R14A	Q96A00-2	1_Phospho		QPGLRQPSPSHDGSLSPLQDR; QPSPSHDGSLSPLQDR	0.25	0.6	0.1	0.58	1.24	-0.02	-0.08	0.57	0.48	0.3	0.49	-0.02
KIAA1522	Q9P206-3	1_Phospho	S940: Phospho	LQLERPVsPETQADLQR; PVsPETQADLQR; KLQLERPVsPETQADLQR	-0.46	-0.12	-0.59	-0.76	-0.22	0.2	-1.08	-0.36	0.16	-0.62	-0.12	0.57
SRRM1	Q8IYB3-2	2_Phospho	S558: Phospho; S560: Phospho	sPsPAPPPRR; sPsPAPPPR; RRsPsPAPPPR; RsPsPAPPPR	0.02	0.15	0.11	0.05	-0.12	0.53	0.21	-0.12	0.33	0.33	-0.17	-0.29
PARP10	Q53GL7	1_Phospho	S431: Phospho	AGPVsPGCVK	0.61	0.05	0.28	0.07	-0.28	0.07	-0.29	-0.25	0.33	-0.13	0.2	0.35
DTL	Q9NZJ0	1_Phospho	S679: Phospho	KAENPSPRsPSSQTPNSR; AENPSPRsPSSQTPNSR; sPSSQTPNSR	0.13	0.37	0.12	-0.11	0.18	0.63	0.66	-0.75	1.03	0.51	0.62	-0.27
ARHGAP29	Q52LW3	1_Phospho	S1029: Phospho	LLLAsPPNER; LLLAsPPNERNGR	-0.14	-0.06	0.28	0	0.28	0.24	-0.43	-0.21	0.07	-0.15	0.16	0.32
ENO1	P06733	1_Phospho	S79: Phospho	TIAPALVsK	0.24	0.77	0.32	0.5	0.13	-0.51	0.27	0.64	0.29	0.44	0.22	-0.06
MLL	Q03164	2_Phospho	S1837: Phospho; T1845: Phospho	GPGEPDsPTPLHPPtPPILSTDR	-0.11	-0.12	-0.01	-0.36	-1.03	-0.14	0.45	-0.11	-0.41	0.04	-0.5	-0.11
SAFB2	Q14151	2_Phospho	S563: Phospho; S565: Phospho	VTKsGsRGMER	0.82	0.16	0.53	0.83	0.33	0.86	0.67	-0.41	0.98	0.01	0.39	-0.72
CDK12	Q9NYV4	3_Phospho	S341: Phospho; S343: Phospho; S345: Phospho	RsLsRsPLPSR; sLsRsPLPSR	-0.04	-0.67	-0.13	-0.47	-0.73	1.13	-0.22	-0.41	-0.44	-0.32	-0.42	0.5
PHC3	Q8NDX5-2	2_Phospho	S597: Phospho	MDRTPPPPTLsPAAITVGR	-0.98	0.03	-0.27	0.05	0.22	0.24	-0.62	0.21	0.12	0.1	-0.23	-0.44
NT5C	Q8TCD5	1_Phospho	S182: Phospho	LLsWSDNWR	0.08	0.39	-0.46	0.35	0.38	0.01	0.05	0.25	0.6	0.59	0.24	-0.72
STT3B	Q8TCJ2	1_Phospho	S29: Phospho	SSLNSSPWSGLMALGNsR	1.05	0.66	0.83	1.16	0.08	-0.19	0.41	0.59	0	0.73	-0.07	0.06
F11R	Q9Y624	1_Phospho	S284: Phospho	KVIYSQPsAR; VIYSQPsAR	-0.05	-0.42	-0.12	-0.61	-0.13	-0.05	-0.17	-0.6	-1.37	-1.07	-0.4	-0.13
SATB2	Q9UPW6	1_Phospho	S39: Phospho	LEQNGsPMGAR	0.17	-0.24	-0.15	0.01	-1.02	-0.38	0.47	-0.3	-0.59	0	-0.45	-0.18
PLEKHG2	Q9H7P9-3	1_Phospho	S1289: Phospho	ASsPPPQPQPPPPPAR	0.13	0.23	-0.05	0.13	0.04	-0.31	0.06	0.07	0.07	0.32	-0.03	0.24
CDK11B	P21127-10	2_Phospho	S359: Phospho; T365: Phospho	EYGsPLKAYtPVVVTLWYR	0.31	0.22	0.21	0.07	-0.08	-1.26	0.09	0.28	0.16	0.15	-0.3	0.06
CNN3	Q15417	1_Phospho	S162: Phospho	AGQsVIGLQMGTNK	0.56	0.26	0.5	1.01	0.77	-0.09	0.18	0.41	0.42	0.87	0.58	-0.19
FAM76B	Q5HYJ3-2	1_Phospho	S193: Phospho	ISNLsPEEEQGLWK	-0.31	-0.58	-0.48	-0.19	-0.49	-0.35	-0.3	0.02	-0.32	0.09	-0.07	-0.53
RUFY1	Q96T51-3	1_Phospho	T74: Phospho	RAtGNLSASCGSALR	0.32	0.41	-0.03	0.27	0.03	0.15	0.22	-0.06	0.29	0.02	0.02	-0.37
PHF20	Q9BVI0	1_Phospho	S159: Phospho	SLSSsPDKR	-0.08	0.02	0.09	-0.14	0.09	0.46	0.04	-0.14	0.32	0.32	0.14	0.82
CEP170	Q5SW79-2	1_Phospho	S1405: Phospho	SSPVNNHHsPGQTPTLGQPEAR	0.07	-0.13	-0.14	-0.03	-0.02	0.06	0.04	-0.15	0.2	-0.21	0.24	-0.16
GNG12	Q9UBI6	1_Phospho	S26: Phospho	LEAsIER	0.3	0.93	0.79	0.4	0.63	0.3	0.07	0.37	0.2	-0.55	0.2	0.49
ATF7	P17544-2	2_Phospho	T51: Phospho	TDSVIIADQtPTPTR	-0.83	-0.23	-0.67	0.12	-0.1	0.03	-0.16	0.09	0.08	0.18	0.04	-0.1
RASSF1	Q9NS23	1_Phospho	S207: Phospho	RTsFYLPK	0.47	0.4	0.2	0.64	0.05	0.28	0.91	0.88	0.43	0.79	0.38	0.02
ASXL2	Q76L83	1_Phospho	S845: Phospho	APSPTGPALISGAsPVHCAADGTVELK	0.51	0.46	-0.31	0.91	-0.26	-0.06	-0.22	0.07	-0.02	0.06	0.07	0.53
GAS2L1	Q99501	1_Phospho	T334: Phospho	EGPEtPPRPR	0.26	0.35	0.11	-0.36	-0.03	-0.61	0.22	-0.04	-0.2	-0.42	-0.14	0.13
FARP1	Q9Y4F1-2	1_Phospho	S427: Phospho	VSAGEPGSHPsPAPR	-0.27	0.11	0.02	0.12	-0.28	-0.01	0.27	0.27	0.17	0.26	-0.15	-0.07
API5	Q9BZZ5	1_Phospho		ASEDTTSGSPPKK	-0.02	1.35	0.31	0.05	-0.06	0.17	0.47	0.12	0.77	0.18	0.22	-0.68
SH3BP4	Q9P0V3	1_Phospho		SYSLSELSVLQAK; VPSPSALLVDNPTPFGNAK; RSYSLSELSVLQAK	0.72	-0.88	0.32	1.57	0.66	1.17	0.14	0.49	0.05	-0.02	-0.12	1.27
SRRM2	Q9UQ35-2	1_Phospho	S440: Phospho	HASSSPEsPKPAPAPGSHR	-0.25	-0.63	-0.22	-0.23	-0.03	0.97	0.22	0.51	0.13	0.51	0.28	0.13
EXO1	Q9UQ84	1_Phospho	S598: Phospho	TIsPPTLGTLR	0.14	-0.48	0.56	-0.12	0.16	-0.24	0.29	-0.29	0.33	-0.03	0.14	0.27
COBLL1	Q53SF7-4	1_Phospho	S1070: Phospho	QSsLTFQSSDPEQMR	-0.87	-0.22	-0.92	-1.14	-1.08	-0.99	-1.11	0.18	0.5	-1.4	-1.29	-0.17
SPIRE1	Q08AE8-2	1_Phospho	S387: Phospho	KLRPVsPEEIR; LRPVsPEEIRR; LRPVsPEEIR; KLRPVsPEEIRR	-0.48	-0.38	0.08	-0.08	-0.04	-0.06	-0.39	-0.48	-0.17	-0.26	-0.18	0.07
ANLN	Q9NQW6-2	1_Phospho	S65: Phospho	SCTKPsPSK	0.09	-0.71	0.27	-0.08	0.07	0.02	-0.13	0.15	0.2	0.27	0.39	0.57
SPTBN1	Q01082-3	1_Phospho	S812: Phospho	GRLsGIEER	0.21	0.1	-0.12	0.86	-0.87	-0.08	-0.24	-0.12	-0.15	0.52	-0.56	0.19
NGEF	Q8N5V2-3	1_Phospho	S514: Phospho	FVsFTSR	1.39	1.07	0.55	0.88	3.48	-1.83	1.11	0.99	1.56	1.01	2.1	-0.88
NKRF	O15226	1_Phospho		SESHTDLTFSR	-0.02	0.36	-0.31	0.05	0.05	0.77	-0.11	0.65	0.19	-0.04	-0.07	-0.38
PTK2	Q05397-4	1_Phospho	S416: Phospho	LGDFGLsR	-0.27	0.33	-0.9	0.02	-0.36	-0.49	0.17	0.6	0.39	0.38	0.02	-0.86
RNPS1	Q15287-3	1_Phospho	S214: Phospho	RFsPPRR; RFsPPR	-0.03	0.37	0.16	0.17	-0.01	0.02	0.05	0.2	-0.21	0.09	-0.14	0.3
MTMR4	Q9NYA4	1_Phospho	S629: Phospho	TSsDPNLNNHCQEVR	-0.25	0.18	-0.62	-0.04	0.07	-0.03	-0.44	-0.21	-0.1	-0.2	-0.19	-0.47
NOC2L	Q9Y3T9	2_Phospho	S672: Phospho; S673: Phospho	KQFKDLFDLNssEEDDTEGFSER; QFKDLFDLNssEEDDTEGFSER; DLFDLNssEEDDTEGFSER	0.23	0.07	0.72	0.51	0.32	0.67	-0.02	-0.11	0.04	0	0.13	0.25
ZNF775	Q96BV0	1_Phospho	S531: Phospho	AAPACsPKEEAR	-0.22	0.54	0	0.27	-0.07	-0.13	-0.39	-0.44	-0.29	0.4	-0.15	0.56
CDK12	Q9NYV4	2_Phospho	S325: Phospho	SGSYSGRSPsPYGR	-0.29	-0.28	-0.35	-0.06	-0.29	0.36	-0.11	-0.5	-0.38	0.04	-0.39	-0.28
MAST4	O15021-1	1_Phospho	S1681: Phospho	ELsPSSLK	-0.12	-0.17	-0.24	-0.84	0.22	-0.18	-0.1	-0.17	-0.77	-0.71	0.08	-0.13
MEX3D	Q86XN8	1_Phospho	S514: Phospho	HsPTLPEPGGLR	-0.67	-0.29	-0.54	-0.7	-0.66	-0.32	-0.42	-0.3	-0.96	-0.13	-0.53	-0.24
GMIP	Q9P107	1_Phospho	S919: Phospho	GPSPAAAsPEGSPLRR; GPSPAAAsPEGSPLR	-0.12	-0.06	-0.23	-0.63	0.15	0.11	-0.1	-0.05	0.11	-0.65	0.42	0.6
HMGCS1	Q01581	1_Phospho	S4: Phospho	PGsLPLNAEACWPK	-0.21	0.16	-0.94	0.76	0.7	-0.65	-0.5	0.24	0.18	0.68	0.88	-1.04
DDX46	Q7L014	1_Phospho	S928: Phospho	QDGGQNEsFKR	-0.1	-0.25	-0.63	0.1	-0.32	0.19	-0.02	-0.03	-0.3	0.17	-0.2	-0.41
CDC42EP4	Q9H3Q1	1_Phospho	S11: Phospho	QLVSSsVHSK	0.25	0.1	0.1	0.47	0.51	0.05	0.08	0.41	-0.36	0.37	0.46	0.02
PSIP1	O75475	1_Phospho	S106: Phospho	QSNASsDVEVEEKETSVSK; QSNASsDVEVEEKETSVSKEDTDHEEK; QSNASsDVEVEEK	0.04	-0.2	0.51	0.3	0.28	-0.45	0.32	-0.08	0.43	0.53	0.51	-0.11
NF1	P21359-2	1_Phospho	S2494: Phospho	GSEGYLAATYPTVGQTsPR	-0.28	-0.25	-0.05	0.27	-0.53	-0.44	0.21	0.53	0.16	0.14	-0.55	0.92
PML	P29590-4	1_Phospho	S527: Phospho	AVSPPHLDGPPsPR	0.16	0.24	-0.28	0.13	-0.11	0.23	0.12	0.11	-0.19	0.04	-0.05	0.28
DCP1B	Q8IZD4	1_Phospho	S283: Phospho	RHsPPIEK	0	-0.37	-0.49	0.02	-0.43	-0.18	1.31	1.62	1.44	1.36	0.56	-1.71
GTSE1	Q9NYZ3	1_Phospho	S243: Phospho	KEIPAsPSR	-0.15	-0.04	0.2	-0.24	-0.11	0.7	-0.2	-0.12	0.07	0.01	0.05	0.57
CCNL2	Q96S94-3	1_Phospho	S116: Phospho	LVEsPKEGK; LVEsPK	-0.71	-0.03	0.26	-0.87	-0.2	-0.48	-0.8	0.04	-0.03	-0.56	-0.08	0.22
ZC3H4	Q9UPT8	1_Phospho	S1299: Phospho	GFDPTAsPFCQ	0.04	0.44	0.27	0.13	-0.43	0.1	0.02	0	0.13	0.2	-0.16	0.81
PSMD2	Q13200	1_Phospho	S361: Phospho	FGGsGSQVDSAR	0.33	0.03	-0.1	-0.2	-0.12	-0.32	0.5	0.33	-0.14	0.39	-0.3	-0.05
MATR3	P43243-2	1_Phospho	S310: Phospho	SYsPDGK; SYsPDGKESPSDK; SYsPDGKESPSDKK	-0.01	-0.19	0.11	-0.25	-0.37	-0.38	0.16	-0.07	0.02	0.15	0.09	0.01
KIAA0754	O94854-2	1_Phospho	S666: Phospho	RDsDSFLNIFPEK	-0.17	0.35	0	0.52	-0.01	-0.3	0.36	0.17	0.03	0.61	0.28	-0.22
IGF2BP2	Q9Y6M1-6	1_Phospho	S94: Phospho	ISYIPDEEVSsPSPPQR	-0.65	0.24	-0.18	-0.06	-0.07	-0.08	-0.13	0.02	0.14	0.27	-0.07	0.07
LARP4	Q71RC2-4	1_Phospho		DGLNQTTIPVSPPSTTKPSR; ASTASPCNNNINAATAVALQEPR	-0.4	-0.81	-0.88	-0.44	-0.89	0.22	0.26	-0.01	0.2	0.24	0.2	0.88
SETD2	Q9BYW2-3	1_Phospho	S532: Phospho	CCsPPNELGFR	-0.06	0.37	-0.77	0.07	-0.42	0.18	0.06	0.24	0.31	0.4	-0.46	-1.2
HNRNPM	P52272-2	1_Phospho	S594: Phospho	GNFGGsFAGSFGGAGGHAPGVAR	0.97	0.09	0.78	0.16	1.54	0.26	0.25	0.08	0.31	-0.01	0.61	-0.26
GPRC5A	Q8NFJ5	1_Phospho	S336: Phospho	EFsIPR	1.58	2.17	2.1	1.48	1.49	1.88	0.7	1.42	1.06	0.8	0.64	2.58
PLEC	Q15149-4	1_Phospho	S21: Phospho	TSsEDNLYLAVLR; RTSsEDNLYLAVLR	0.05	0.17	-0.56	0.04	0.22	0.04	0.1	0.31	0.66	0.1	0.27	-0.92
ARHGAP22	Q7Z5H3-2	1_Phospho	S16: Phospho	SKsLVMGEQSR	0.11	-0.52	-0.19	-0.29	0.27	-0.45	0.03	-0.21	0	-0.2	0.39	-0.43
PAPOLA	P51003-2	1_Phospho	S24: Phospho	HYGITsPISLAAPK	0.25	-0.49	-0.74	0.07	0.7	0.7	-0.43	0.23	0.1	0.43	0.55	-0.23
PRKCA	P17252	1_Phospho	S226: Phospho	STLNPQWNEsFTFK	0.66	0.73	0.53	0.88	0.15	-0.17	0.6	0.79	0.34	0.65	0.07	-0.19
EXOC2	Q96KP1	2_Phospho	S432: Phospho; S435: Phospho	GSsFQsGRDDTWR	-0.49	0.3	-0.07	-0.13	0.02	0.4	-0.69	-0.62	-0.14	0.17	-0.37	0.09
TLN1	Q9Y490	1_Phospho	S729: Phospho	VVAPTISsPVCQEQLVEAGR	-0.82	-0.37	-0.24	-0.63	-0.74	0.19	-1.05	-0.9	-0.51	-0.85	-0.93	0.99
KDM5C	P41229	1_Phospho	S1359: Phospho	VQGLLENGDSVTsPEK	-0.5	0.33	-0.92	0.06	-0.13	-0.08	0.01	-0.15	0.11	-0.06	0.11	-0.06
GAS2L1	Q99501-2	1_Phospho	S316: Phospho	RGsRPEMTPVSLR	0.51	-0.48	0.14	-2.44	-0.12	-0.87	0.34	0	0.18	-0.06	-0.15	0.2
SON	P18583	1_Phospho	S1570: Phospho	ILPTsETK	0.33	-0.01	-0.18	-0.32	-0.34	-0.04	-0.02	0.13	-0.23	0.39	-0.33	0.57
KTN1	Q86UP2-3	1_Phospho	T153: Phospho	KVEPVPVTKQPtPPSEAAASK; QPtPPSEAAASK; VEPVPVTKQPtPPSEAAASK	0.31	0.51	0.51	0.17	0.32	0.08	0.31	0.38	0.13	0.06	0.17	0.28
SEPT9	Q9UHD8-7	1_Phospho	T123: Phospho	AEVLGHKtPEPAPR	0.08	-0.1	0.07	-0.13	0.1	0.47	-0.61	0.08	0.12	-0.58	0.54	0.68
MAP1B	P46821	2_Phospho	S2209: Phospho; S2211: Phospho	HMDPPPAPVQDRsPsPR	-1.75	-0.73	-0.83	-0.64	-0.13	0.14	-1.59	-1.33	-0.1	-0.84	-0.13	-0.74
AKNA	Q7Z591	1_Phospho	S1422: Phospho	SsLSADLR	0.83	0	0.12	-0.23	0.46	-0.6	0.88	0.15	0.36	0.06	0.68	-0.21
TNS1	Q9HBL0	1_Phospho	S899: Phospho	AAsDGQYENQSPEATSPR	-0.59	-0.43	-0.67	-1.03	-0.09	0.13	-0.36	-0.05	-0.05	-0.14	0.38	0.12
WDR20	Q8TBZ3-2	1_Phospho	S465: Phospho	FATLsLHDR; FATLsLHDRK	-0.3	-0.01	-0.21	0.19	-0.19	-0.07	-0.43	0.1	-0.47	0.23	-0.54	0.06
BASP1	P80723	1_Phospho	T196: Phospho	ETPAATEAPSStPK	-0.57	-0.55	-0.11	-0.77	-0.09	0.69	-0.17	-0.1	-0.27	-0.38	0.08	1.05
C2orf44	Q9H6R7	1_Phospho	S299: Phospho	SEGNsLICLR	0.02	-1.27	-1.26	-0.27	-0.35	-0.38	0.59	-0.1	0.86	0.27	0.41	-1.44
MAP1B	P46821	1_Phospho	S1793: Phospho	ESsPLYSPTFSDSTSAVK; ESsPLYSPTFSDSTSAVKEK	-2.07	-0.39	-0.77	-0.59	-0.28	-0.37	-1.37	-0.22	0.47	-0.44	-0.04	-0.62
STIM2	Q9P246	1_Phospho	S680: Phospho	SCsMNQLSSGIPVPKPR	0.8	-0.41	-0.61	0.25	0.37	-0.33	0.48	0.38	0.07	0.08	0.35	-0.36
ARHGAP11A	Q6P4F7	1_Phospho	S422: Phospho	AGCFsPK	0.03	-0.42	0.3	-0.32	-0.28	0.24	0.54	0.44	0.77	0.73	0.7	0.22
CDK11A	Q9UQ88-4	1_Phospho	S727: Phospho	GTsPRPPEGGLGYSQLGDDDLK; GTsPRPPEGGLGYSQLGDDDLKETGFHLTTTNQGASAAGPGFSLKF	0.14	0.53	0.84	0.11	0.24	0.28	-0.22	0.13	0.05	0.02	-0.18	0.52
ADD1	P35611-3	1_Phospho	S358: Phospho	SPGsPVGEGTGSPPKWQIGEQEFEALMR; GsPVGEGTGSPPKWQIGEQEFEALMR; SPGsPVGEGTGSPPK; SPGsPVGEGtGSPPKWQIGEQEFEALMR	-0.49	-0.1	0.02	-0.03	-0.63	-0.57	-0.25	0.13	0.1	0.16	-0.39	0.02
UCKL1	Q9NWZ5-3	1_Phospho	S16: Phospho	ADADPSPTsPPTAR	0.19	0.08	0.1	0.32	0.35	0.07	-0.24	-0.02	-0.26	-0.03	0.08	-0.1
PLEC	Q15149-6	1_Phospho	S4253: Phospho	SSsVGsSSSYPISPAVSR; SSsVGSSSSYPISPAVSR	0.08	0.47	-0.12	0.34	0.07	0.01	0.24	0.53	0.26	0.26	-0.06	-0.65
IQSEC1	Q6DN90	1_Phospho	S89: Phospho	LQHSTsILR	0.05	-0.61	-0.77	0.39	0.28	0.3	1.35	1.99	1.44	2.07	1.64	-1.86
ENSA	O43768-9	1_Phospho	S125: Phospho	SsLVTSK; KSsLVTSK	0.94	0.17	0.5	0.45	0.04	-0.41	1.24	0.74	0.8	1.13	0.23	-0.63
ITSN2	Q9NZM3-3	1_Phospho	S889: Phospho	TVSPGSVsPIHGQGQVVENLK	-0.09	-0.44	-0.16	-0.14	0.16	0.19	0.09	0.13	-0.15	-0.01	0.31	0.16
UNK	Q9C0B0	1_Phospho	S240: Phospho	QGYACPYYHNsKDR	-0.33	-0.55	-0.59	0.16	-0.41	-0.06	0.15	-0.21	0.31	-0.29	0.1	0.09
MSH6	P52701-2	1_Phospho	S309: Phospho	MVTGNGsLK; MVTGNGsLKR	0.25	0.12	0.12	0.46	0.23	0.03	0.25	0.42	0.4	0.69	0.21	0.03
NCAPD2	Q15021	1_Phospho	S1333: Phospho	YQPLASTAsDNDFVTPEPR	0.25	-0.07	0.26	0.7	0.31	0.26	-0.16	-0.01	0.21	0.42	0.9	-0.12
GPATCH2L	Q9NWQ4-4	1_Phospho	S31: Phospho	LGELWEEMALsPR	0	0.02	-0.18	-0.52	0.21	-0.18	-0.08	-0.2	-0.04	-0.57	-0.01	0.5
FAM76B	Q5HYJ3	1_Phospho	S338: Phospho	SGSILTsP	-0.24	-0.3	-0.03	-0.35	0.21	0.08	-0.17	0.04	-0.06	-0.2	0.19	0.27
SCARF2	Q96GP6-2	2_Phospho	S646: Phospho; S648: Phospho	GEIGGLSLsPsPERR; GEIGGLSLsPsPER	0.02	-0.36	0	0.57	0.29	0.52	0.07	-0.07	-0.59	0.18	0.36	0.49
ULK1	O75385	1_Phospho	S450: Phospho	NLQsPTQFQTPR	0.33	0.28	0.01	-0.02	0.28	0.37	-0.41	0.08	-0.66	0.22	-0.3	-0.07
CPSF7	Q8N684	1_Phospho	S48: Phospho	SSsTEPPPPVR	0.14	0.19	-0.35	0.24	0	-0.12	0.1	-0.04	-0.13	0.04	-0.32	-0.35
AAK1	Q2M2I8	1_Phospho		ILSDVTHSAVFGVPASK; LGGSAESLIPGFQSTQGDAFATTSFSAGTAEKR; VGSLTPPSSPK	0.68	0.55	0.26	0.71	-0.11	-0.15	0.24	0.62	-0.19	0.51	-0.07	-0.47
DOCK5	Q9H7D0	1_Phospho	S1756: Phospho	APEPDLMsPTR	0.2	-0.52	0.11	-0.22	0.14	-0.04	0.06	-0.14	-0.07	-0.02	-0.14	0.67
SMARCA1	P28370-2	1_Phospho	S919: Phospho	RIsIK	0.46	0.55	0.43	0	0.05	0.21	0.64	0.56	0.47	0.31	0.25	0.27
MAP7D1	Q3KQU3	1_Phospho	S460: Phospho	LSASTASELsPK	-0.09	-0.16	0.07	-0.07	0.35	0.66	0	0.27	0.18	0.42	0.52	0.5
SDAD1	Q9NVU7-2	1_Phospho	S488: Phospho	YIEIDsDEEPRGELLSLR; YIEIDsDEEPRGELL; KYIEIDsDEEPR; KYIEIDsDEEPRGELLSLR; YIEIDsDEEPR	-0.24	-0.21	-0.11	-0.43	-0.43	0.4	-0.07	-0.12	-0.1	-0.15	-0.23	0.53
ERC1	Q8IUD2-4	2_Phospho	S17: Phospho; S21: Phospho	SVGKVEPSSQsPGRsPR; VEPSSQsPGRsPR	0.06	0.1	0.27	0.07	0.2	-0.4	0.2	-0.29	0.23	0.14	0.27	-0.51
ZFHX4	Q86UP3-4	1_Phospho	S2724: Phospho	NLLsPSSFK	0.35	-0.34	-0.28	0.55	0.28	0.89	0.13	-0.54	0.09	0.25	0.31	0.14
ARCN1	P48444	1_Phospho	S493: Phospho	VTQVDGNsPVR	-0.07	0.22	-0.07	-0.07	0.19	0.39	-0.41	0.08	-0.5	-0.46	-0.15	0.61
PTRF	Q6NZI2	1_Phospho	S171: Phospho	sLKESEALPEK; LSISKsLK	1.07	0.43	0.65	0.5	0.08	0.22	1.3	0.87	1.11	0.65	0.26	0.33
ZDHHC5	Q9C0B5	1_Phospho	S529: Phospho	LVPTGPTHREPsPVR	0.25	0.57	0.31	0.29	0.25	-0.25	0.35	0.09	0.05	-0.09	0.07	-0.04
MAP4	P27816-5	1_Phospho	T669: Phospho	SKVGStENIK; VGStENIK; SKVGStENIKHQPGGGR	0.16	-0.38	-0.39	-0.25	-0.25	0.29	0.41	0.13	0.38	0.08	0.07	-0.06
DSP	P15924	1_Phospho	S2821: Phospho	GLPSPYNMSsAPGSR	-0.84	-0.04	0.13	-0.44	-0.4	0.33	-0.98	-0.35	0.01	-0.79	-0.67	0.34
TTYH3	Q9C0H2-2	1_Phospho	S490: Phospho	AKYLATSQPRPDSSGsH; YLATSQPRPDSSGsH	-0.23	0.32	0.28	0.21	0.04	0.07	0.02	0.25	0.01	0.07	0.14	-0.14
C6orf106	Q9H6K1	1_Phospho	S215: Phospho	VEGNFNPFAsPQK; KVEGNFNPFAsPQK	0.31	-0.11	0.39	-0.03	0.07	-0.05	0.16	0.09	0.48	-0.06	0.13	0.47
MKI67	P46013-2	1_Phospho	T955: Phospho	DIIIFVGtPVQK	-0.25	-0.47	0.54	-0.04	-0.34	0.72	-0.16	-0.03	-0.14	-0.38	-0.25	1.58
ABLIM3	O94929-3	1_Phospho	T448: Phospho	SSSYADPWtPPR	-0.76	-0.64	-0.72	-1.04	-0.13	-0.09	-0.44	-0.2	-0.52	-0.6	-0.29	-0.33
YEATS2	Q9ULM3	1_Phospho	S118: Phospho	FLEsPSR; KFLEsPSR	0.08	-0.22	0.12	0.11	-0.15	0.15	0.03	-0.38	0.03	0.07	-0.15	0.23
TOP2A	P11388-4	1_Phospho	S1606: Phospho	YLEEsDEDDLF	-0.34	-0.2	0.16	0.15	-0.25	0.57	-0.17	-0.08	0.44	0.22	-0.1	0.31
NUP188	Q5SRE5-2	1_Phospho	S1598: Phospho	GAPSsPATGVLPSPQGK	-0.1	-0.13	0.14	-0.17	0.09	0.69	-0.57	-1.61	-0.86	-1.94	-0.97	0.38
AHNAK	Q09666	1_Phospho	S5752: Phospho	ASLGsLEGEAEAEASSPK	-0.44	0.15	0.22	-0.39	-0.79	-0.46	0.64	0.91	0.77	0.88	-0.2	-0.11
PLEKHO1	Q53GL0-2	1_Phospho	S237: Phospho	CAsLEEILSQR	-1.4	-0.12	-0.47	-0.64	-0.1	0.37	-0.5	0.16	-0.49	-0.67	0.37	-0.14
SERBP1	Q8NC51-3	1_Phospho	S315: Phospho	SKsEEAHAEDSVMDHHFR	-0.91	-0.02	0.18	-0.7	-0.02	1.28	-0.26	0.68	0.44	0.82	0.47	1.72
USP10	Q14694	1_Phospho	S365: Phospho	YsPPAISPLVSEK	-0.43	-0.55	-0.46	-0.39	-0.24	0.28	-0.23	0.43	-0.06	0.47	0.22	0.8
DBN1	Q16643-2	1_Phospho	T337: Phospho	MAPTPIPtRSPSDSSTASTPVAEQIER	-0.23	-0.2	-0.31	-0.69	-0.06	0.04	0.14	0.03	-0.19	0.04	0.1	-0.18
ZC3H18	Q86VM9	2_Phospho	S532: Phospho	LGVsVSPSR	0.41	0.23	0.17	0.3	-0.06	0.37	0.64	0.05	0.01	0.33	0.01	0.16
SIPA1	Q96FS4	1_Phospho	S67: Phospho	SGSDAGEARPPTPAsPR	-0.03	0.39	-0.03	-0.33	0.36	-0.15	-0.05	-0.38	-0.14	-0.21	0.22	-0.16
DLG5	Q8TDM6-5	1_Phospho	S550: Phospho	sGHFDVTTVASIK	-0.18	-1.1	-1.14	-0.36	0.19	-0.06	0.76	0.61	0.79	0.89	0.98	-0.44
EPN1	Q9Y6I3-3	1_Phospho	S428: Phospho	GSLAEAVGsPPPAATPTPTPPTR	-0.4	0.02	-0.25	-0.1	0.09	0.29	0.1	-0.09	-0.31	0.03	0.04	0.5
ZNF185	O15231-2	1_Phospho	T120: Phospho	LQILtPR	-0.9	-0.23	0.46	-0.77	0.52	1.52	-1.33	-0.52	0.16	-0.64	0.35	1.01
ARHGAP21	Q5T5U3	1_Phospho		STSHDRVPQSVQIR; RNSEGSELSCTEGSLTSSLDSR	0.62	0.23	-0.58	0.15	0.02	0.09	0.03	0.19	-0.21	0.01	-0.2	0.12
HDGF	P51858	1_Phospho	S165: Phospho	RAGDLLEDsPKRPK; AGDLLEDsPK; AGDLLEDsPKRPK	-0.04	0.12	-0.38	-0.28	0.01	-0.23	-0.08	0.14	-0.2	-0.25	-0.01	-0.49
KIAA1462	Q9P266	1_Phospho		GQAGLPGGLVSPGSGDR; VLSPESLSCTEIPIPLNERHSPK; VLSPESLSCTEIPIPLNER	-0.25	0.49	0.05	0.19	-0.08	-0.48	-0.28	-0.88	0.22	-1.38	0.57	-0.62
PRKRA	O75569	1_Phospho	S18: Phospho	EDsGTFSLGK; AEAPPLEREDsGTFSLGK	-0.11	0.3	-0.24	0.52	-0.41	-0.21	0.04	0.44	0.38	0.52	-0.32	-0.22
SLC12A4	Q9UP95-4	1_Phospho	S51: Phospho	ESSPFLsPLEASR	-0.38	0.38	-0.02	-0.35	0.3	1.56	-0.07	-0.2	0.14	-0.5	0.24	0.59
CCNY	Q8ND76-3	2_Phospho	T277: Phospho	SASADNLtLPR	1.42	1.63	1.74	1.21	0.71	-0.31	0.95	-0.12	0.28	0.38	0.08	-0.67
PHC3	Q8NDX5-2	1_Phospho	T590: Phospho	MDRtPPPPTLSPAAITVGR	-1.18	-1.56	-1.41	-0.83	-0.92	0.83	-0.84	0.03	-0.13	-0.47	-0.04	-0.35
MICAL3	Q7RTP6	1_Phospho	S1649: Phospho	RPDsPTRPTLR	0.19	0.2	0.22	0.46	-0.05	0.42	-0.23	0.06	0.4	0.22	-0.48	0.34
CLIP2	Q9UDT6	1_Phospho	S923: Phospho	VLLLEANRHsPGPER	0.65	0.07	0.4	0.49	0.42	0.04	0.48	-0.07	-0.19	0.08	0.31	-0.18
ANP32E	Q9BTT0	No Phospho		DAEDDGEEEDD; KRDAEDDGEEEDD	0.05	0.14	0.17	0.2	-0.3	-0.63	0.06	1.05	1.15	0.55	0.13	-0.74
TMEM237	Q96Q45-5	1_Phospho	S62: Phospho	RPsEGNEPSTK	0.47	0.28	0.73	0.46	0.04	0.24	0.4	-0.06	0.1	0.22	-0.06	0.41
NAA15	Q9BXJ9	2_Phospho	S855: Phospho; S856: Phospho	ITVNGDssAEAEELANEI	-0.58	0.01	-0.13	-0.28	-0.07	1.05	0.75	1.07	1.18	0.66	1.08	0.12
TMEM245	Q9H330-4	1_Phospho	S16: Phospho	ADGGGPKDAPSLRSsPGPAPR; DAPSLRSsPGPAPR	1.46	0.42	2.37	2.1	1.3	1.02	0.82	-0.66	1.15	0.13	0.7	-0.49
FKBP1A	P62942	1_Phospho	S9: Phospho	GVQVETIsPGDGR	-0.5	0.23	-0.06	-0.04	0.31	0.3	-0.3	0.7	0.22	0.23	0.59	0.76
TANC2	Q9HCD6-2	1_Phospho	S1468: Phospho	DSAYISSsPLGSHQVFDFR	-0.12	-0.33	0.25	0.36	0.1	-0.07	0.03	0.07	0.26	0.32	0.16	0.38
UIMC1	Q96RL1	1_Phospho	S463: Phospho	EVsPGSRDILDGVR	1.01	1.19	-0.04	0.89	0.1	0.44	0.4	-0.38	-0.28	0.08	-0.24	-0.54
LMNA	P02545-3	2_Phospho	S392: Phospho	LSPsPTSQR; LRLSPsPTSQR	0.43	0.27	0.47	0.26	0.32	0.05	0.42	0.43	0.31	-0.07	0.55	0.17
DFFA	O00273	1_Phospho	S315: Phospho	SISASKAsPPGDLQNPKR; SISASKAsPPGDLQNPK	-0.32	0.11	-0.23	-0.04	0.12	1	0.06	0.09	-0.06	0.07	0.33	0.36
PDHA2	P29803	2_Phospho	S291: Phospho; S298: Phospho	YHGHsMSDPGVsYR	0.2	-0.62	-0.32	0.35	-0.01	0.24	0.83	0.41	0.51	0.6	-0.27	-0.59
ATXN2L	Q8WWM7	1_Phospho	S409: Phospho	GINGGPSRMsPK	0.21	0.11	0.3	0.2	0.46	0.24	0.13	-0.01	0.45	-0.19	0.48	-0.03
SGPP1	Q9BX95	1_Phospho	S101: Phospho	NGLAAELGPAsPR	-0.25	0.01	0.32	-0.2	0.34	1.03	-0.94	-0.28	-0.8	-1.33	0.06	1.85
BIRC6	Q9NR09	1_Phospho	T3931: Phospho	AVSAtPPRPPSR	0.61	0	0.32	0.09	0.23	0.39	-0.01	-0.44	0.05	-0.51	-0.22	0.15
LUZP1	Q86V48	1_Phospho	S995: Phospho	TQsSLTVSEVLTR; RTQsSLTVSEVLTR	-0.23	-0.11	-0.59	-0.38	0.63	0.53	0.36	1.06	0.71	0.31	1.06	0.18
RDBP	P18615	1_Phospho	S131: Phospho	sLYESFVSSSDR	-0.77	-0.31	0.23	-0.34	-0.14	-0.3	-0.11	0.31	-0.02	0.56	0.33	0.16
IFI16	Q16666-3	1_Phospho	S153: Phospho	VSEEQTQPPsPAGAGMSTAMGR	0.26	0.1	-0.04	-0.29	0.29	-0.22	-0.01	0.11	-0.47	-0.32	0.32	-0.07
TMCC2	O75069	1_Phospho	S438: Phospho	FGsADNIAHLK; NKFGsADNIAHLK	0.22	-0.62	-0.43	-0.1	0.52	-0.32	0.28	-0.87	-0.27	-0.34	0.45	-0.43
LATS1	O95835	1_Phospho	T612: Phospho	KQITtSPITVR; QITtSPITVR	-0.34	0.51	0.54	0.74	0.47	-0.32	-0.43	-0.32	-0.2	0.39	-0.09	-0.08
PLEC	Q15149-6	2_Phospho		SSSVGSSSSYPISPAVSR	0.58	0.39	-0.35	0.14	0.52	-0.64	-0.31	-0.67	-0.99	-0.89	-0.77	0.18
PSMA5	P28066	1_Phospho	S16: Phospho	GVNTFsPEGR	-0.44	-0.11	0.03	0.06	0.1	0.97	-0.78	-0.13	-0.4	-0.13	0.02	1.39
TNRC18	O15417	1_Phospho	S1540: Phospho	THAPSALsPPR	0.27	-0.73	-0.41	0.21	0.23	0.11	0.92	1.12	1.34	1.16	0.91	-0.58
SRRM2	Q9UQ35-2	1_Phospho	S1987: Phospho	TsPVTR; SRTsPVTR	-1.04	0.48	-0.2	-0.03	-0.36	-0.07	-0.44	0.04	-0.85	0.24	-0.03	0.67
ENO2	P09104	1_Phospho	Y44: Phospho	AAVPSGASTGIyEALELR	0.29	0.12	0.2	-1.35	0.46	0.34	0.12	0.12	0.48	0.44	0.51	1.31
FXR1	P51114-3	1_Phospho	T512: Phospho	LQRtPGEEK	0.34	-0.6	1.15	0.58	0.46	0.47	0.3	0.13	1.03	0.16	0.88	-0.07
SNTB2	Q13425-2	1_Phospho	S110: Phospho	GLGPPSPPAPPRGPAGEAGAsPPVRR; GPAGEAGAsPPVR; GPAGEAGAsPPVRR	0.01	0.31	-0.1	0.08	0.19	-0.31	0.12	0.12	-0.5	0.2	0.1	0.51
HIVEP2	P31629	1_Phospho	S819: Phospho	SEsAELVACTQDK	0.32	0.3	0.44	0.48	0.06	0.02	0.23	0.17	0.36	-0.32	0.08	0.44
MARCKSL1	P49006	1_Phospho	S104: Phospho	LSGLsFKR; LSGLsF; LSGLsFK	0.02	0.64	-0.94	0.04	-0.17	-0.51	-0.29	-0.15	-0.94	-0.54	-0.59	-0.94
SRRM2	Q9UQ35-2	1_Phospho	S1592: Phospho	SRLsPR	0.05	0.24	0.34	0	-0.16	0.03	-0.23	0.23	-0.04	0.03	-0.04	0.11
RNPS1	Q15287-3	1_Phospho	S4: Phospho	APsPTKRK; APsPTK	0.16	0.15	0.27	0.14	-0.15	0.07	0.09	0.09	0.17	0.3	0.12	0.3
YBX1	P67809	1_Phospho	S314: Phospho	AADPPAENSsAPEAEQGGAE	1.5	1.13	0.98	1.26	0.3	0.21	-0.49	-0.37	-0.05	-0.48	-0.83	0.09
SLC4A7	Q9Y6M7-8	1_Phospho	S64: Phospho	AVYIGVHVPFSKEsR	-0.56	0.39	1	0.49	-0.13	-0.57	-1.12	0.23	-0.11	0.37	-0.17	-0.09
SSFA2	P28290	1_Phospho	S739: Phospho	SQsLPTTLLSPVR; SQsLPTtLLSPVR; SQsLPTTLLsPVR	0.35	0.06	-0.79	-0.19	0.2	-0.7	0.47	-0.04	0.15	-0.65	0	-1.43
CAMSAP2	Q08AD1-2	1_Phospho		SSSMSYVDGFIGTWPK	-0.3	-0.28	-1.16	0.05	-0.19	0.29	-0.22	-0.25	0.2	-0.18	0.27	-0.45
DOCK4	Q8N1I0	1_Phospho	S1724: Phospho	ERPCsAIYPTPVEPSQR	-0.7	-0.66	-0.98	-1.36	0.33	1.26	0.72	0.71	0.66	-0.16	0.79	0.31
NKAP	Q8N5F7	1_Phospho	S149: Phospho	IGELGAPEVWGLsPK	-0.44	0.28	0.24	0.12	0.1	-0.32	-0.99	0.17	-0.05	0.25	0.17	0.32
PTPRJ	Q12913	1_Phospho	S1011: Phospho	NNEVSFsQIKPK	0.42	0.76	1.11	1.04	0.63	0.08	0.67	0.76	1.05	0.93	0.53	0.59
AHNAK	Q09666	1_Phospho	S5110: Phospho	AEAPLPsPK; FKAEAPLPsPK	0.2	0.07	0.54	-0.05	0.36	0.26	-0.19	-0.27	0.14	-0.34	0.21	0.25
AHNAK	Q09666	1_Phospho	S5735: Phospho	GGVTGSPEAsISGSKGDLK; GGVTGSPEAsISGSK; GKGGVTGSPEAsISGSKGDLK; GKGGVTGSPEAsISGSK	0.35	-0.11	0.42	0.33	-0.11	-0.98	-0.16	-0.39	-0.2	-0.27	-0.49	-0.1
TERF2	Q15554	1_Phospho	S323: Phospho	DLVLPTQALPAsPALK	0.77	0.95	1.9	0.46	0.48	0.35	0.11	-0.08	0.24	0.21	0.09	0.5
KIF26B	Q2KJY2-2	1_Phospho	S1281: Phospho	LEQLAsR	1.26	0.93	0.93	1.42	0.58	-0.83	1.14	1.25	0.76	1.01	0.79	-0.24
GEM	P55040	1_Phospho	S289: Phospho	sCHDLSVL; SKsCHDLSVL	-1.06	-1.51	-2.44	-1.2	-0.48	-0.04	-0.62	-0.39	0.42	-0.86	0.1	0
MEPCE	Q7L2J0	1_Phospho	S217: Phospho	SsPLPAK; TLNAETPKSsPLPAK	-0.2	0.15	0.42	-0.48	-0.09	0.33	-0.08	0.48	0.57	0.33	0.3	0.15
WDR11	Q9BZH6	1_Phospho	S205: Phospho	VYISsPHSSPAHNK	-1.48	-0.19	-0.3	-1.37	-0.31	0.1	-0.33	-0.01	-0.03	-0.25	-0.21	-0.05
CKAP2L	Q8IYA6-2	1_Phospho	T331: Phospho	NEALPVTLGFQtPES	0.2	0.14	0.04	-0.19	0.06	0.5	0.29	-1.27	0.21	-1.04	-0.96	0.34
ZC3H13	Q5T200	1_Phospho	S207: Phospho	SKLsPSPSLR	-0.44	-0.23	-0.11	-0.12	-0.55	0.46	0.27	0.05	0.29	0.36	0.1	-0.06
CDK11B	P21127	1_Phospho	S234: Phospho	sPPRPPR; ASHWSRsPPRPPR	0.43	-0.73	-0.84	0.38	-0.11	-0.01	0.39	0.42	0.42	0.36	0.24	-0.22
ARHGEF40	Q8TER5-2	1_Phospho	S799: Phospho	ALsDPTTPL	-0.28	-0.44	-0.43	-0.64	0.19	-1.19	0.16	-0.23	-0.63	0.33	0.44	-0.53
CENPT	Q96BT3-2	1_Phospho	S47: Phospho	ALLETAsPR	0.74	0.02	0.39	0.1	0.69	0.44	0.24	-0.92	-0.03	-0.4	0.11	1.03
PRR11	Q96HE9	1_Phospho	S40: Phospho	LITPPPPPPsPER	-0.1	-0.06	0.13	0.07	-0.19	0.49	-0.12	-0.19	-0.11	0.1	-0.45	0.53
FXR2	P51116	1_Phospho	T411: Phospho	AGYStDESSSSSLHATR	-1.26	0.07	-0.22	-1.21	0.11	-0.22	0.62	0.28	0.72	0.24	0.4	-0.16
AKAP12	Q02952	1_Phospho	S612: Phospho	EGVTPWAsFKK; EGVtPWAsFKK; EGVTPWAsFK; EGVTPWAsF	-0.85	-0.33	-0.15	-0.22	-0.41	-0.41	-0.86	-0.08	-0.47	-0.34	-0.37	0.01
ZNF655	Q8N720-2	1_Phospho	S60: Phospho	EGsPGDQAAALLTAR	0.19	0.05	0.83	0.66	0.58	0.3	0.17	0.29	0.2	0.29	0.25	0.36
PWWP2A	Q96N64-2	1_Phospho	S81: Phospho	sPEAVGPELEAEEK	-0.42	-0.32	-0.3	-0.84	-0.4	0.04	-0.06	-0.79	-0.11	0.09	-0.09	0.74
KIF1B	O60333-2	1_Phospho	S1011: Phospho	SGLsLEELR	-0.18	0.22	-0.62	-0.28	0.13	-0.03	-0.15	0	-0.15	-0.35	-0.05	-0.7
STK24	Q9Y6E0-2	1_Phospho	S4: Phospho	AHsPVQSGLPGMQNLK; AHsPVQSGLPGMQNLKADPEELFTKLEK; AHsPVQSGLPGMQNLKADPEELFTK	-0.21	-0.22	-0.07	-0.19	-0.07	0.03	-0.13	0.14	-0.31	0.1	-0.17	0.49
SRSF11	Q05519	1_Phospho	S456: Phospho	TKECsVEK; ECsVEKGTGDSLR; TKECsVEKGTGDSLR	0.23	0.21	-0.91	0.5	0.11	0.01	0.4	0.23	0.26	0.32	0.17	0.03
F11R	Q9Y624	1_Phospho	S287: Phospho	sEGEFKQTSSFLV; sEGEFK	-0.01	-0.1	0.51	-0.52	-0.46	0.2	-0.29	-1.56	-1.62	-1.77	-1.51	0.47
KIF1C	O43896	1_Phospho	S494: Phospho	EDGGTVGVFsPK	-0.14	0.29	-0.38	0.3	0.1	0.83	0.14	0.12	0.5	0.41	1.03	0.13
PPIP5K2	O43314	1_Phospho	S1006: Phospho	sGEQITSSPVSPK	-0.19	0	-0.26	-0.12	-0.37	-0.34	0.32	-0.01	-0.02	-0.48	-0.03	0.03
TMCC3	Q9ULS5	1_Phospho	T6: Phospho	PGSDtALTVDR	0.63	-0.89	-1.14	0.1	0.38	-0.42	0.18	-1.42	0.21	0.14	0.68	-0.48
ACIN1	Q9UKV3-5	1_Phospho	S977: Phospho	SGVsITIDDPVR	0.3	0.88	0.42	0.35	0.28	0.48	0.02	0.6	0.34	0.48	0.02	0.5
ZMYND8	Q9ULU4	1_Phospho	S547: Phospho	ELSESVQQQSTPVPLIsPKR; ELSESVQQQSTPVPLIsPK	-0.71	-1.24	0.16	-0.32	-0.83	-0.15	0.11	0.09	0.14	0.54	-0.01	0.09
SPRED2	Q7Z698	1_Phospho	S206: Phospho	QVsFPDDDEEIVR	0.21	0.16	0.58	0.21	0.54	0.08	0.24	-0.37	-0.51	0.06	0	0.12
SRRM2	Q9UQ35-2	3_Phospho	S1404: Phospho; T1413: Phospho	AGMSSNQSISsPVLDAVPRtPSR	0.76	0.45	-0.48	0.42	0.16	0.03	-0.2	-0.27	0.17	-0.34	-0.11	0.1
BCL2L13	Q9BXK5	1_Phospho	S371: Phospho	SsPATSLFVELDEEEVK; SsPATSLFVELDEEEVKAATTEPTEVEEVVPALEPTETLLSEK; EPDTEVITVEKSsPATSLFVELDEEEVK	0.96	0.27	0.21	0.34	0.2	-0.11	0.81	0.31	-0.51	0.09	0.17	0.41
ATN1	P54259	1_Phospho	S34: Phospho	GRAsPGGVSTSSSDGK	0.24	-0.42	0.63	0.16	0.28	-0.11	0.41	0.49	0.49	0.62	0.4	-0.02
SPECC1	Q5M775-4	1_Phospho	S50: Phospho	sVSSPTSSNTPTPTK	-0.55	-0.18	-0.1	-0.9	-0.69	0.26	-0.51	0.36	-0.62	0.31	-0.15	0.85
SF3B1	O75533	1_Phospho	T244: Phospho	GSEtPGATPGSK; AKGSEtPGATPGSK	0.09	-0.31	-0.04	-0.75	-0.08	-0.15	0.19	0.17	0.18	0.09	0.12	0.29
PCF11	O94913	2_Phospho	S509: Phospho; S511: Phospho	sMsPTSTPK; QRsMsPTSTPK	0.95	-0.09	0.8	0.83	0.64	0.38	0.27	-0.09	-0.18	0.48	0.22	-0.77
ELAVL1	Q15717	1_Phospho	S202: Phospho	NVALLSQLYHsPARR; NVALLSQLYHsPAR; FAANPNQNKNVALLSQLYHsPAR	0.16	0.15	-0.04	0.03	0.21	0.4	-0.05	-0.03	-0.28	-0.15	0	0.23
BCLAF1	Q9NYF8	1_Phospho	S648: Phospho	QKsPEIHRR; QKsPEIHR; sPEIHRR	-0.16	0.13	0.04	0.1	0.05	0.06	-0.26	-0.08	-0.37	-0.12	-0.05	0.05
AHNAK	Q09666	1_Phospho	S3362: Phospho	FNFSGsK; FNFSGsKVQTPEVDVK	0.99	0.61	0.94	1.08	0.44	-1.11	0.2	0.64	0.62	0.65	0	-0.33
CLASP1	Q7Z460-3	1_Phospho	S1152: Phospho	FSFRsQEDLNEPIKR; sQEDLNEPIKR	-0.11	-0.17	0.05	-0.34	-0.16	-0.38	-0.14	0.02	0.02	-0.23	-0.09	-0.18
SRRM2	Q9UQ35-2	2_Phospho	S1404: Phospho	AGMSSNQSISsPVLDAVPRTPSRER; AGMSSNQSISsPVLDAVPRTPSR; AGMSSNQSISsPVLDAVPR	-1.24	-0.46	-0.34	0.04	-0.23	0.13	0.14	0.03	-0.01	0.14	-0.08	0.16
DDX54	Q8TDD1	1_Phospho	S75: Phospho	LGPGRPLPTFPTSECTsDVEPDTR; KLGPGRPLPTFPTSECTsDVEPDTR	-0.67	-0.09	-0.07	-0.33	-0.37	0.78	-0.36	-0.15	-0.12	-0.42	-0.4	0.39
TMPO	P42167-2	2_Phospho	S66: Phospho; S67: Phospho	GPPDFssDEEREPTPVLGSGAAAAGR; NRPPLPAGTNSKGPPDFssDEEREPTPVLGSGAAAAGR	0.43	0.28	1.01	0.4	0.54	0.26	0.42	-0.4	0.33	-0.27	0.59	0.24
PDLIM7	Q9NR12	2_Phospho	S247: Phospho; T251: Phospho	HsQPAtPTPLQSR; YAPDKTSTVLTRHsQPAtPTPLQSR	0.04	-0.18	-0.12	-0.55	-0.38	-0.12	-0.69	-1	-0.34	-0.2	-0.23	-0.18
BCLAF1	Q9NYF8	1_Phospho	S658: Phospho	RIDIsPSTLRK; RIDIsPSTLR; IDIsPSTLRK; IDIsPSTLR	-0.32	0.04	-0.21	-0.1	-0.1	-0.02	-0.24	0.08	-0.02	0.01	0.05	0.05
IWS1	Q96ST2	2_Phospho	S196: Phospho; S198: Phospho	HQAsDsENEEPPKPR	-0.06	-0.08	-0.42	-0.07	-0.81	0.76	0.12	-0.74	0.03	0.06	0.5	-0.12
PPP1R13L	Q8WUF5	1_Phospho	T308: Phospho	ESSLDGLGGTGKDNLTSAtLPR; DNLTSAtLPR	0.36	-0.33	0.58	0.4	1.01	0.25	0.15	-0.14	0.91	0.3	1.06	0.4
BRD8	Q9H0E9-4	1_Phospho	S284: Phospho	KGSLLPTsPR; GSLLPTsPR	-0.14	-0.07	0.15	-0.11	-0.14	0.01	-0.35	-0.52	-0.01	-0.39	-0.28	0.08
AFAP1	Q8N556-2	2_Phospho	S752: Phospho	SGTSSPQsPVFR	-0.51	0.43	0.1	-0.16	-0.87	0.92	-0.87	-0.23	-0.08	-0.11	-1.74	0.33
USP25	Q9UHP3-1	1_Phospho	T149: Phospho	TPtEVWR	-1.05	0.38	0.06	-0.34	-0.52	-0.85	-0.55	0.56	0.41	0.49	-0.59	0.23
SYNRG	Q9UMZ2-6	1_Phospho	S881: Phospho	SSPsPALEQPFR; SSPsPALEQPFRDR	0.34	0.23	0.58	0.11	0.49	0.03	-0.14	-0.45	-0.09	-0.75	0.13	0.01
MAP4	P27816-5	1_Phospho	S580: Phospho	sVPADLSRPK	0.35	0.24	0.19	0.29	0.23	0.37	0.11	0.48	0.13	1.11	-0.12	-0.45
TJP2	Q9UDY2-5	1_Phospho	S244: Phospho	GRsIDQDYER	0.03	-0.27	0.28	-0.47	0.39	0.49	0.53	0.11	0.35	0.3	0.35	0.19
DOCK5	Q9H7D0	1_Phospho	S1766: Phospho	sLQLMDNR; KAQRPKsLQLMDNR; AQRPKsLQLMDNR	0.33	0.17	0.35	0.01	-0.02	-0.48	0.39	0.42	0.34	0.37	0	0.17
PHLDB2	Q86SQ0-2	1_Phospho	S384: Phospho	NFsCGSVEFDEADLESLR	0.83	0.2	-0.68	0.66	-0.75	0.97	-0.59	-0.65	0.15	0.83	0.37	-1.05
LMNB1	P20700	2_Phospho	S23: Phospho	AGGPTTPLsPTR	-0.1	-0.58	0.13	-0.4	-0.11	0.28	0.08	-0.56	-0.08	-0.45	-0.36	0.28
CTTNBP2NL	Q9P2B4	2_Phospho	S557: Phospho; S568: Phospho	VSsPLSPLSPGIKsPTIPR	-0.64	-0.64	-1.14	-0.4	-0.12	-0.07	-1.03	-0.49	-0.22	-0.66	-0.19	-0.73
EGFR	P00533	1_Phospho	S1042: Phospho	TPLLSSLSATsNNSTVACIDR	-0.05	-0.11	0.26	0.41	-0.13	0.46	0.6	0.6	0.91	0.89	0.57	-0.02
UIMC1	Q96RL1	1_Phospho	S29: Phospho	DVETTSSVsVK; DVETTSSVsVKR	0.03	0	-0.26	0.1	-0.01	-0.17	0.46	0.56	0.08	0.98	0.03	0.23
CDK1	P06493	1_Phospho	T161: Phospho	VYtHEVVTLWYR	0.13	0.13	0.14	0.28	0.1	0.47	-0.25	0.02	0.23	-0.07	0.16	0.23
SRSF10	O75494	1_Phospho	S133: Phospho	SRsFDYNYR	-0.54	-0.18	-0.37	0.02	-0.21	-0.16	-0.26	0.01	-0.23	0.06	-0.43	-0.02
NHSL1	Q5SYE7-2	1_Phospho	S324: Phospho	LDSDAGFHsLPR	0.84	-0.16	-0.35	-0.37	0.55	-0.8	1.13	0.23	0.5	0.18	0.73	-0.86
AHNAK	Q09666	1_Phospho	T551: Phospho	VDIETPNLEGtLTGPR	1.34	0.23	0.39	0.8	0.65	-0.23	0.47	0.2	0.88	0.37	0.44	-0.33
FEN1	P39748	1_Phospho	S349: Phospho	VTGsLSSAKR; VTGsLSSAK	0.89	0.03	0.45	0.61	0.83	0.3	0.32	0.05	0.42	0.42	0.43	0.33
NPM1	P06748-2	1_Phospho	S70: Phospho	YEGsPIKVTLATLK; TVSLGAGAKDELHIVEAEAMNYEGsPIK; DELHIVEAEAMNyEGsPIKVTLATLK; TVSLGAGAKDELHIVEAEAMNyEGsPIK; DELHIVEAEAMNYEGsPIK; TVSLGAGAKDELHIVEAEAMNyEGsPIKVTLATLK; TVSLGAGAKDELHIVEAEAMNYEGsPIKVTLATLK; DELHIVEAEAMNYEGsPIKVTLATLK; SLGAGAKDELHIVEAEAMNYEGsPIK; NYEGsPIKVTLATLK	-0.29	-0.47	-0.15	-0.57	-0.73	0.15	-0.16	0.07	0.06	0.12	-0.39	0.77
SLCO4A1	Q96BD0	1_Phospho	S43: Phospho	ASPGtPLSPGsLR; ASPGTPLSPGsLR	1.02	0.68	1.53	1.24	0.28	-1.52	0.7	0.43	0.46	0.68	0.03	-0.4
THRAP3	Q9Y2W1	1_Phospho	S575: Phospho	MDsFDEDLARPSGLLAQER	-0.13	0.63	-0.36	0.03	0.04	0.8	0.06	0.24	0.47	0.38	0.17	-0.1
VIM	P08670	1_Phospho	S412: Phospho	LLEGEESRIsLPLPNFSSLNLR; LLEGEESRIsLPLPN; KLLEGEESRIsLPLPNFSSLNLR	0.7	0.03	0.64	0.22	0.4	0.24	0.9	0.39	0.6	0.34	0.38	0.25
LRRFIP2	Q9Y608-4	1_Phospho	S96: Phospho	GsGDTSSLIDPDTSLSELR; RGsGDTSSLIDPDTSLSELR; RGsGDTSSLIDPDTSLSELRDIYDLK	-0.03	0.19	-0.1	-0.68	-0.32	-0.43	0.13	-0.06	-0.14	-0.23	-0.24	-0.33
BOD1L1	Q8NFC6	1_Phospho	S3019: Phospho	SKTQLsPSIK; TQLsPSIKR	-0.04	-0.08	0.06	-0.06	-0.24	0.21	-0.03	-0.03	0.07	0.04	-0.12	0.46
EMD	P50402	1_Phospho	S171: Phospho	DSAYQSITHYRPVsASR	0.49	0.58	0.81	0.53	0.79	0.19	0.1	0.16	0.14	-0.24	0.23	0.39
NCKIPSD	Q9NZQ3-4	1_Phospho	S147: Phospho	QHsLPSSEHLGADGGLYQIPPQPR	0.22	0.51	0.14	0.66	-0.24	-0.04	0.16	0.3	0.27	0.18	-0.09	-0.1
EML3	Q32P44-2	1_Phospho	S198: Phospho	GGKDPLSsPGGPGSR	0.51	-0.16	0.04	-0.15	0.17	0.03	0.77	0.52	0.41	0.06	0.65	0.33
DGCR14	Q96DF8	2_Phospho	S391: Phospho; S395: Phospho	GLsPAMsPALQR	0.33	0.24	0.34	0.54	0.26	0.23	-0.02	-0.38	-0.35	-0.9	-0.52	0
OSBPL11	Q9BXB4	1_Phospho	S181: Phospho	SFSLASSSNsPISQR	-0.2	-0.35	-0.09	-0.27	0.07	0.11	-0.11	-0.14	0.06	-0.1	0.2	0.25
MAPKBP1	O60336	1_Phospho	S1263: Phospho	SIsVGENLGLVAEPQAHAPIR	0.51	0.06	0.18	-0.57	0.31	0.06	0.66	0.38	0.67	-0.21	0.55	0.08
RBM39	Q14498	1_Phospho	S97: Phospho	YRsPYSGPK	0.19	0.01	-0.08	0.18	0.15	0.06	0.26	0.15	0.08	0.16	0.23	0.11
LMO7	Q8WWI1-4	2_Phospho	S246: Phospho; S249: Phospho	REDsFEsLDSLGSR	-0.15	0.27	0.11	0.4	-0.62	0.45	0.75	-0.18	0.56	0.76	0.11	-0.25
AHNAK	Q09666	1_Phospho	T5839: Phospho	GHYEVtGSDDETGK; SKGHYEVtGSDDETGK; SKGHYEVtGSDDETGKLQGSGVSLASK; GHYEVtGSDDETGKLQGSGVSLASKK	0.54	-0.83	-0.99	0.37	0.05	-0.47	0.34	0.31	0.63	0.3	0.43	-0.17
HP1BP3	Q5SSJ5-5	1_Phospho	T48: Phospho	TVNStRETPPKSK; TVNStRETPPK	0.04	0.15	-0.09	-0.15	-0.51	-0.44	0.57	0.22	0.22	0.34	-0.03	-0.22
FAM171A1	Q5VUB5	2_Phospho	S360: Phospho	DQSTSMsHINLLFSR	-0.32	0.47	1.1	0.57	-0.15	0.25	-0.26	-0.55	0.15	0.16	-0.01	-0.27
MCM2	P49736	1_Phospho	S13: Phospho	ESSESFTMASsPAQR; AESSESFTMASsPAQR; AESSESFTMASsPAQRR	0	-0.03	-0.08	-0.15	0.26	0.04	0.38	0.12	-0.41	0	0.21	0.27
ANKZF1	Q9H8Y5	1_Phospho	T607: Phospho	AQVPGPLtPEMEAR	0.08	0.06	0.48	0.25	0.65	-0.46	0.21	0.23	0.5	0.34	0.37	-0.04
SPNS1	Q9H2V7-4	1_Phospho	T446: Phospho	StRVPVASVLI	-0.19	-0.23	0.01	-0.47	0.07	0.91	-0.69	-0.76	-1.45	-0.67	-0.31	-0.16
EHBP1	Q8NDI1	3_Phospho	S428: Phospho; S432: Phospho; S436: Phospho	TGVLNENTVSAGKDLSTsPKPsPIPsPVLGR; DLSTsPKPsPIPsPVLGR	-0.3	-0.61	0.38	0.43	-0.29	-0.45	0.12	-0.65	0.25	0.21	-0.43	-0.23
RAB11FIP5	Q9BXF6	1_Phospho	S286: Phospho	SSWLsTEGGR	0.23	0.44	0.45	0.02	0.1	-0.05	0.34	0.49	0.35	0.01	0.08	0.61
CIT	O14578-4	1_Phospho	S2068: Phospho	VWDQSsV	0.03	0.23	-0.93	-0.24	-0.77	0.13	-0.03	-0.15	-0.36	-0.26	-0.26	0.04
TSC2	P49815-2	1_Phospho	S1345: Phospho	SSSsPELQTLQDILGDPGDK; SSSsPELQTLQDILGDPGDKADVGR	-0.04	0.48	0.35	0.5	0.16	-0.52	0.45	0.3	0.17	0.31	-0.43	-0.05
FAM21C	Q9Y4E1-4	1_Phospho	S498: Phospho	AVAsPEATVSQTDENK	-0.29	-0.52	0.08	0.13	-0.57	0.68	-0.36	-0.09	-0.15	0	-0.46	0.77
EML4	Q9HC35	2_Phospho	S144: Phospho; S146: Phospho	AsPsPQPSSQPLQIHR	-1.21	-0.98	-0.08	0.41	-0.87	-0.33	-0.86	-0.61	-1.21	0.33	-0.67	0.33
FAM83G	A6ND36-2	1_Phospho	S402: Phospho	QLsAPHITR	0.02	0.18	-0.3	-0.35	0.11	0.76	0.15	-0.25	-0.14	0.88	0.17	-0.01
NAV1	Q8NEY1-3	1_Phospho		QNSSDSISSLNSITSHSSIGSSK; QKSLTNLSFLTDSEK; KQKSLTNLSFLTDSEK; SSPLSWR; TSLDVSNSAEPGFLAPGAR; KTSLDVSNSAEPGFLAPGAR; SVSSLSNRSSPLSWR	0.06	0.23	-0.04	-0.09	0.4	0.1	0.04	-0.29	-0.22	0.22	0.39	-0.66
SMEK1	Q6IN85-4	1_Phospho	S502: Phospho	QsPSFK; TNLSGRQsPSFK	0.19	0.21	0.36	0.47	0.21	-0.21	-0.26	-0.08	-0.09	-0.03	0.07	0.08
OSBPL7	Q9BZF2	1_Phospho	S272: Phospho	LHGsVPNLSR	0.3	-1.14	-0.67	0.12	-0.14	-0.02	1.2	1.58	1.42	1.25	0.94	-0.61
SNTA1	Q13424	1_Phospho	S201: Phospho	QPSsPGPTPR	-0.43	-0.34	0.4	0.06	-0.14	-0.29	-0.03	0.71	0.8	0.94	0.24	-0.12
ZDHHC5	Q9C0B5	1_Phospho	S445: Phospho	SAQGTGFELGQLQsIR	-0.9	-0.17	-0.42	-1.79	-1.53	-0.15	0.38	-0.39	-1.53	-0.76	-0.67	0.05
BUD13	Q9BRD0	2_Phospho	T159: Phospho; S163: Phospho	HDtPDPsPLR; HDtPDPsPLRGAR	-0.04	0.12	-0.51	0.34	0.16	0.63	-0.08	-0.96	-0.04	0.03	0.18	-0.84
MYO9B	Q13459	1_Phospho	S2141: Phospho	RYsDPPTYCLPPASGQTNG	0.13	0	0.32	-0.45	-0.07	-0.39	0.01	-0.12	-0.13	-0.09	0.04	-0.04
IFI16	Q16666-3	1_Phospho	T123: Phospho	TEGAEAtPGAQKR	0.62	-0.19	-0.39	-0.95	0.56	0.33	0.3	-0.34	-0.98	-0.56	0.61	-0.39
SLC20A1	Q8WUM9	1_Phospho	S335: Phospho	ERLPsVDLK; LPsVDLK	0.99	0.71	0.86	0.23	1.81	-0.54	1.44	0.93	0.49	0.67	1.49	0.27
NCOA3	Q9Y6Q9-2	1_Phospho	S214: Phospho	TPHDILEDINAsPEMR	-0.63	0.15	-0.16	-0.37	-0.2	0.41	0.02	0.02	-0.26	0.12	-0.06	0.61
ALKBH5	Q6P6C2-1	1_Phospho	S361: Phospho	RGsFSSENYWR	0.59	0.22	0.04	0.49	0.22	-0.1	0.49	0.53	0.62	0.74	0.18	-0.37
ARHGEF12	Q9NZN5	1_Phospho	S1327: Phospho	TGTGDIATCYsPR	0.28	0.34	0.23	0.16	-0.03	0.29	0.28	0.02	0.17	-0.16	-0.07	0.21
RPL27A	P46776	1_Phospho	S68: Phospho	NQsFCPTVNLDK	-0.17	-1.02	-2.01	-0.91	-0.45	-0.69	0.78	0.89	0.08	0.66	0.51	-0.92
HECW2	Q9P2P5	1_Phospho	S852: Phospho	SNsIQQMEQLNR; SNsIQQMEQLNRR	-0.09	-0.18	-1.77	-0.18	0.23	0.28	-0.17	0.51	0.69	0.83	0.13	0.07
GPATCH8	Q9UKJ3	1_Phospho	S1035: Phospho	SQsPHYFR	0.06	0.3	-0.11	0.08	-0.18	0.06	0.06	0.32	0.21	0.31	-0.11	-0.08
RBBP6	Q7Z6E9-2	1_Phospho	S516: Phospho	LGYLVsPPQQIR	0.25	0.11	0.47	-0.06	0.25	0.45	0.13	-0.01	-0.14	-0.3	0.05	0.58
SPEN	Q96T58	2_Phospho	S725: Phospho; S727: Phospho	RPIERsQsPVHLR	0.27	0.05	0.17	0.3	-0.71	0.46	0.45	-0.09	0.4	0.44	0.23	-0.41
RGS3	P49796-6	1_Phospho	S839: Phospho	THsEGSLLQEPR	0.02	-2.14	-1.32	0.04	0.31	-0.54	1.79	1.94	1.79	1.88	1.74	-1.2
LIMA1	Q9UHB6-4	1_Phospho	S610: Phospho	TVsPPIRK; TVsPPIR	0.13	0.43	0.28	0.11	0.53	0.66	0.03	0.3	0.08	-0.02	0.51	0.7
NSUN5P1	Q3KNT7-3	1_Phospho	T150: Phospho	AAAGACtPPCT	-0.11	-0.27	0.01	-0.38	0.06	0.29	-0.4	-0.08	0.05	-0.16	-0.69	0.1
VIM	P08670	2_Phospho	S39: Phospho; S42: Phospho	TYsLGsALRPSTSR	1.01	0.37	-0.12	0.22	0.88	0.8	1.07	0.38	0.64	0.4	0.65	-0.04
RCC2	Q9P258	1_Phospho	S16: Phospho	AAAAAWEEPSsGNGTAR	-0.03	-1.26	-0.15	-0.03	-0.56	-0.29	0.18	0.64	-0.19	0.69	0.2	0.31
G3BP2	Q9UN86-2	1_Phospho	S163: Phospho	QPsPEPVQENAN	0.41	0	0.13	-0.32	-0.51	0.11	0.19	0.47	0.01	0.7	0.09	0.86
BAP18	Q8IXM2	1_Phospho	S96: Phospho	VYEDSGIPLPAEsPK; VYEDSGIPLPAEsPKKGPK; KVYEDSGIPLPAEsPK	-0.15	-0.11	-0.17	0.14	-0.43	-0.49	0.02	-0.03	-0.03	0.04	-0.12	0.38
USP14	P54578	1_Phospho		YAGALRASGEMASAQYITAALR	1.99	1.85	1.44	0.64	2.13	-1.2	0.61	0.5	-0.79	-0.59	0.71	0.11
SH3BP1	Q9Y3L3	1_Phospho	T626: Phospho	APTVPPPLPPtPPQPAR	0.05	0.49	0.01	0.27	0.22	0.18	-0.23	0.06	-0.37	-0.22	-0.47	0.09
EPHA2	P29317	2_Phospho	S897: Phospho; S901: Phospho	LPsTSGsEGVPFR; VSIRLPsTSGsEGVPFR	0.47	0.3	0.11	-0.93	1.1	-0.15	0.7	-0.05	-0.01	-0.24	0.93	0.35
KIF20B	Q96Q89-5	1_Phospho	S432: Phospho	FGDFLQHsPSILQSK	0.36	-0.44	-1.46	0.15	-0.09	0.18	0.5	0.5	0.64	0.5	0.24	-1.23
ZC3HAV1	Q7Z2W4-3	1_Phospho	S275: Phospho	FFQGSQEFLASASASAERsCTPsPDQISHR; SCTPsPDQISHR	0.37	0.25	0.06	0.31	-0.38	0.26	0.09	0.14	-0.1	0.13	-0.11	-0.02
RHBDF1	Q96CC6	1_Phospho	S390: Phospho	RIDsFVK; IDsFVKR; RIDsFVKR	1.04	0.69	0.29	0.75	1.01	-0.83	0.95	0.49	0.17	0.52	0.66	-0.13
TPM4	P67936	No Phospho		IQALQQQADEAEDR	-0.37	0.48	0.26	-0.41	-0.01	0.12	-0.34	0.35	0.09	0.03	-0.35	0.17
ARF4	P18085	1_Phospho	S147: Phospho	LGLQsLR	-0.01	-0.64	-0.12	-0.41	0.34	-0.39	0.26	-0.4	-0.41	0.01	0.16	0.37
OPTN	Q96CV9-3	1_Phospho	S469: Phospho	TsDSDQQAYLVQR	0.16	0.45	-1.06	-0.28	1.07	-0.08	0.17	0.19	-0.24	0.03	0.7	-0.49
TOP2B	Q02880-2	1_Phospho	S1461: Phospho	FDsNEEDSASVFSPSFGLK; SEDDSAKFDsNEEDSASVFSPSFGLK	-0.11	-0.1	-1.27	-0.91	-0.49	-0.08	0.1	0	-0.28	0.14	-0.06	-0.6
PTPN14	Q15678	1_Phospho	S593: Phospho	HKYVSGsSPDLVTR; YVSGsSPDLVTRK; YVSGssPDLVTR; HKYVSGsSPDLVTRK; YVSGsSPDLVTR	0.41	0.92	0.3	0.55	-0.33	-0.37	0.52	0.98	0.52	0.57	-0.29	-0.32
NUCKS1	Q9H1E3	1_Phospho	S181: Phospho	ATVTPsPVK; LKATVtPsPVK; ATVtPsPVKGK; LKATVTPsPVK; ATVTPsPVKGK; LKATVTPsPVKGK	-0.35	-0.09	0.41	0.18	0.18	-0.07	-0.36	0.18	0.27	0.26	0.2	0.36
ANLN	Q9NQW6-2	2_Phospho	S621: Phospho	AEsGDSLGSEDRDLLYSIDAYR	0.24	0.19	0.43	0.64	0.63	1.22	0.55	-0.54	0.14	0.76	0.72	0.57
ARFGAP3	Q9NP61	1_Phospho	S212: Phospho	ATLEVSsIIK	0.33	-0.16	0.48	0.53	0.51	-0.43	0.15	-0.46	0.32	0.36	0.03	0.09
AHNAK2	Q8IVF2-3	1_Phospho	S194: Phospho	DAHDVsPTSTDTEAQLTVER	0.47	-0.29	-0.23	0.01	0.71	-0.32	0.56	0.27	0.95	0.03	1.19	-0.27
RDBP	P18615	1_Phospho	S51: Phospho	SLsEQPVMDTATATEQAK	0.12	0.09	0.65	0.16	0.21	0.19	0.18	0.66	0.37	0.01	0.24	0.45
LMNA	P02545-3	1_Phospho	S22: Phospho	SGAQASSTPLsPTR; SGAQASStPLsPTR; ATRSGAQASSTPLsPTR; STPLsPTR	0.4	0.32	0.44	-0.04	0.65	0.18	0.45	0.27	0.22	0.01	0.66	0.41
SIRT6	Q8N6T7-2	1_Phospho	T267: Phospho	ALPPLPRPPtPK	0.06	-0.13	0.1	0.07	0.09	-0.09	0.27	0.33	0.06	-0.03	0.4	0.05
WAC	Q9BTA9	1_Phospho	S53: Phospho	DAGDPsPPNK	0.23	0.32	0.19	0.14	0.07	0	-0.01	0.22	-0.48	0.04	-0.07	0.29
PLA2G3	Q9NZ20	1_Phospho	S296: Phospho	sPAPPKPR	0.01	0.16	0.15	0.18	-0.06	0.42	0.07	-0.44	0.2	0.06	0.06	0.19
CDK13	Q14004-2	1_Phospho	S383: Phospho	GGDVsPSPYSSSSWRR; GGDVsPSPYSSSSWR	0.38	0.34	0.19	0.36	-0.02	-0.01	0.06	0.2	0.06	0.14	0.16	-0.12
MICAL2	O94851	1_Phospho	T657: Phospho	SSISNNYLNLtFPR	-0.3	-1.56	-0.08	-1.23	-1.09	-0.74	0.96	-0.06	0.52	-0.43	0.36	-0.25
MYH10	P35580-2	1_Phospho		GGPISFSSSR; QLHLEGASLELSDDDTESK	0.36	0.27	0.15	0.26	0.1	0.33	0.22	0.58	0.51	0.36	0.78	1.38
MGA	Q8IWI9	1_Phospho	S449: Phospho	WLPSsPSGVAK	0.41	0.22	0.48	0.85	0.95	0.19	0.1	0.11	0.04	0.31	-0.13	0.18
CAMK1	Q14012	1_Phospho	S363: Phospho	DCCVEPGTELsPTLPHQL	0.51	0.56	-0.09	-0.25	0.34	0.99	-0.03	-0.07	-0.32	0.29	0.09	0.41
PSIP1	O75475	2_Phospho	S273: Phospho; S275: Phospho	TGVTSTsDsEEEGDDQEGEK; TGVTSTsDsEEEGDDQEGEKK; TGVTSTsDsEEEGDDQEGEKKR	-0.19	-0.09	-0.14	0.53	0.02	-0.45	0.35	-0.26	0.31	0.38	0.29	-0.29
CARHSP1	Q9Y2V2	2_Phospho	S30: Phospho; S32: Phospho	ERsPsPLRGNVVPSPLPTR; ERsPsPLR; sPsPLRGNVVPSPLPTRR; sPsPLRGNVVPSPLPTR	-0.1	0.52	0.12	0.03	0.04	-0.16	-0.04	-0.04	0	0.27	-0.06	0.33
PPIA	P62937	1_Phospho	S40: Phospho	ALsTGEK	-0.17	-0.19	0.34	-0.68	1.34	-0.11	0.17	0.31	0.61	-0.49	1.54	0.16
RAI1	Q7Z5J4-2	1_Phospho	S323: Phospho	TPEQYYQTFSPSSSHsPAR	0.25	0.47	0.07	0.12	-0.02	0.08	0	0.27	0.03	0.2	0.15	-0.15
PRICKLE2	Q7Z3G6	1_Phospho	S695: Phospho	sDNALHLASER; SRsDNALHLASER	-0.04	0.12	-0.1	0	-0.16	-0.19	0.3	0.56	-0.59	0.4	0.36	-0.65
ADSSL1	Q8N142-2	1_Phospho	S495: Phospho	SREsMIQLF	0.57	-0.3	0.78	0.07	0.4	-0.12	0.56	0.17	0.47	0.07	0.51	0.28
NRK	Q7Z2Y5	1_Phospho	T367: Phospho	GPSCtHELLR	0.1	0.33	-0.27	-0.04	0.02	0.13	-0.08	0.02	-0.67	0.31	-0.56	0.83
GIGYF2	Q6Y7W6	1_Phospho	S236: Phospho	WRPHsPDGPR	0.19	0.19	0.06	0.08	0.11	0.13	0.08	-0.01	-0.17	0.16	-0.1	-0.12
CCNL1	Q9UK58	1_Phospho	S372: Phospho	QQAsKSPYNGVR	0.06	-0.21	-0.06	0.06	-0.04	0.03	0.09	-0.43	-0.36	0.05	-0.32	0.77
PUM2	Q8TB72-3	1_Phospho	S82: Phospho	SGQGFHGNSEVNAILsPR	0	-0.05	-0.18	-0.02	0.15	0.36	0.13	0.25	-0.07	0.24	0.09	0.1
KIDINS220	Q9ULH0-4	1_Phospho	S918: Phospho	QMsFDLTK	-0.18	0.43	0.15	0.17	0.03	-0.44	0.23	0.31	0.04	0.24	0.03	-0.19
LMNB1	P20700	1_Phospho	S278: Phospho	LENARLsSEMNTSTVNSAR	0.5	0.39	0.44	0.73	0.45	0.58	0.65	0.04	0.69	0.29	0.78	0.08
MTMR9	Q96QG7	1_Phospho	S548: Phospho	RQLAELETEDGMQEsP; QLAELETEDGMQEsP	0.57	0.6	0.52	-0.01	0.09	0.16	-0.07	-0.62	-0.87	-0.71	-0.23	0.24
SPEN	Q96T58	1_Phospho	S1062: Phospho	LNTVAsPK; LNTVAsPKDCQELASISVGSGSRPSSDLQAR	0	0.18	0.1	0.18	-0.01	-0.56	0.15	0.3	-0.27	0.07	0	0.01
RANBP1	P43487	1_Phospho	S60: Phospho	FAsENDLPEWK	0.08	0.31	-0.52	0.3	-0.29	0.03	0.39	0.73	0.91	0.63	-0.29	-0.98
MMTAG2	Q9BU76	1_Phospho	S220: Phospho	RPAEATSSPTsPERPR	-0.22	-0.56	0.09	-0.3	-0.96	-0.13	0.02	-0.2	0.07	-0.08	-0.37	-0.03
TMEM163	Q8TC26	1_Phospho	S57: Phospho	ISEsGQFSDGLEDR	0.01	-0.4	0.6	-0.09	0.44	-1.3	-0.91	-0.44	-0.73	-0.23	0.22	0
MYO9B	Q13459	1_Phospho	S1242: Phospho	TLPSGsPRPGQLERPTSLALDSR	0.8	-0.74	0.15	1	0.24	0.08	-0.13	-0.26	-0.34	-0.67	0	-0.11
CNPY2	Q9Y2B0	1_Phospho	S115: Phospho	NGEsSELDLQGIR	1.36	1.22	0.6	1.37	0.27	-1.44	1.39	0.75	0.27	0.81	0.11	-0.35
SRSF9	Q13242	1_Phospho	S216: Phospho	GSPHYFsPFRPY	-0.08	-0.35	-0.17	0.33	-0.01	0.01	0.06	0.04	-0.25	-0.14	-0.14	-0.25
WDR75	Q8IWA0	1_Phospho	S796: Phospho	VQDTsNTGLGEDIIHQLSK	-0.27	-0.83	-1	-0.41	-1.05	0.38	-0.1	-0.22	-0.15	0.28	-0.44	-0.59
INO80B	Q9C086	1_Phospho	S132: Phospho	AWLDEDSNLSPsPLR	-0.14	0.21	0.08	-0.64	0.38	0.6	0.38	0.21	-0.52	-0.26	0.42	0.87
SLC12A2	P55011-3	1_Phospho	T217: Phospho	TFGHNtMDAVPR	0.39	0.69	0.4	0.22	0.06	0.03	0.27	0.8	0.56	0.6	0.09	-0.22
ARPP19	P56211	1_Phospho	S104: Phospho	KPsLVASK	-0.35	0.35	0.16	-0.25	0.11	-0.69	0.41	0.67	0.24	0.27	0.14	0.3
ISCU	Q9H1K1	1_Phospho	S14: Phospho	AAsALLLR	0.64	0.37	-0.49	-0.11	0.07	0.08	0.73	0.66	0.15	-0.22	0.01	-0.34
CDK12	Q9NYV4	1_Phospho	T692: Phospho	AItPPQQPYKK; AItPPQQPYK	0.06	-0.03	0.05	-0.17	-0.31	0.01	0.13	0.24	0.05	-0.01	-0.18	0.2
ZNF318	Q5VUA4	1_Phospho	S501: Phospho	HTDFLLPHERAsQDGSGFSR	-1.1	-0.59	-1.42	0.26	-0.34	-0.11	0.24	0.45	0.38	0.29	0.03	-0.73
CCDC88A	Q3V6T2-5	2_Phospho	S1582: Phospho; S1586: Phospho	VHAsRPAsLDSGR	0.25	-1.33	-1.07	0.4	1	-0.64	1.88	1.9	1.94	2.1	2.31	-1.75
POLR2A	P24928	1_Phospho	S1913: Phospho	YSPTsPTYSPTSPK	0.01	-0.13	-0.05	0.27	-0.03	0.05	0.53	0.59	0.4	0.4	0.41	0.1
UACA	Q9BZF9	1_Phospho	S1353: Phospho	RQsQLIDTLQHQVK	1.06	1.72	-0.75	0.87	-0.74	-1.18	1.02	1.43	-0.09	0.52	-0.41	0.14
IRS2	Q9Y4H2	1_Phospho	T520: Phospho	SNtPESIAETPPAR	0.26	0.14	-1.68	0.18	-0.3	0.14	0.82	0.94	0.13	0.6	0.3	-0.78
SLC14A1	Q13336	1_Phospho		VDSPTMVR	0.38	0.68	0.21	1.4	-0.69	-1.86	1	0.79	0.77	1.5	-0.36	-1.42
FLNA	P21333-2	1_Phospho	S2144: Phospho	RAPsVANVGSHCDLSLKIPEISIQDMTAQVTSPSGK; APsVANVGSHCDLSLKIPEISIQDMTAQVTSPSGKTHEAEIVEGENHTYCIR; APsVANVGSHCDLSLKIPEISIQDMTAQVTSPSGK; RAPsVANVGSHCDLSLK; APsVANVGSHCDLSLKIPEISIQDMTAQVTSPSGKtHEAEIVEGENHTYCIR; APsVANVGSHCDLSLK; APsVANVGSHCDLSLKIPEISIQDMtAQVTSPSGKTHEAEIVEGENHTYCIR	-0.03	-0.24	-0.24	-0.33	-0.05	-0.7	0.1	0.21	-0.53	0.22	0.01	0.39
SNAP23	O00161	1_Phospho	S23: Phospho	AHQITDESLEsTRR	-0.28	-1.55	-0.85	0.24	-0.21	0	1.69	2.13	1.81	2.13	1.7	-2.11
RALGPS2	Q86X27	1_Phospho		SATFPNAGPR	0.18	0.53	0.3	0.6	-0.11	-0.57	0.47	0.27	-0.24	0.28	-0.18	0.06
PEG10	Q86TG7-2	1_Phospho	S321: Phospho	SSPAGNsPAPL	0.13	-0.04	0.3	0.33	0.2	0.15	0.47	0.33	0.5	0.12	-0.13	0.52
SLC9A1	P19634	1_Phospho	S693: Phospho	INNYLTVPAHKLDsPTMSR; LDsPTMSR	0.48	0.99	0.53	0.72	0.23	0.22	0.64	0.84	0.24	0.88	-0.09	-0.06
CENPC1	Q03188	2_Phospho	S308: Phospho; S311: Phospho	LIEDEFIIDEsDQsFASR	-0.1	-0.46	-0.45	0.12	-0.2	-0.6	0.54	0.54	0.84	0.6	0.54	0.03
SERPINH1	P50454	1_Phospho	S141: Phospho	LYGPSSVsFADDFVR	0.32	0.8	0.8	0.05	0.97	0.43	0.2	1.23	0.73	0.46	1.15	1.14
TOM1	O60784-4	1_Phospho	S430: Phospho	AADRLPNLSsPSAEGPPGPPSGPAPR; LPNLSsPSAEGPPGPPSGPAPR	-0.3	-0.35	-0.38	-0.56	0.18	0.16	-0.33	-0.3	0.03	-0.11	0.28	-0.09
BCLAF1	Q9NYF8	2_Phospho	S285: Phospho; S290: Phospho	YsPSQNsPIHHIPSR; YsPSQNsPIHHIPSRR	-0.63	0.25	-0.37	0.04	0.03	0.49	-0.47	-1.15	-0.41	-0.23	0.03	-0.39
AHNAK	Q09666	1_Phospho	S5332: Phospho	VHAPGLNLsGVGGK	0.79	-1.63	-0.73	0.79	0.52	0.03	1.15	1.56	1.85	1.58	1.36	-0.84
SMCR7L	Q9NQG6	1_Phospho	S59: Phospho	AISAPTsPTR	-0.1	0.49	0.29	0.3	-0.23	0.17	-0.02	0.31	-0.01	0.11	-0.14	0.26
DIAPH3	Q9NSV4	2_Phospho	S1091: Phospho; S1093: Phospho	DVRQsLsPMSQRPVLK	0.21	0.36	0.55	0.07	-0.17	0.77	0.22	0.08	0.16	0.31	0.1	0.68
ASAP1	Q9ULH1-2	1_Phospho	S10: Phospho	LSsFSSR	-0.06	0.09	-1.05	0.1	0	-0.21	0.1	0.75	0.12	0.4	0.25	-1.56
NEXN	Q0ZGT2-4	1_Phospho	S179: Phospho	ESLsPGK; ESLsPGKLK; KESLsPGKLK; KESLsPGK	-0.18	0.04	-0.3	-0.51	-0.14	-0.14	-0.58	-0.24	-0.14	-0.03	-0.22	0.49
SRRM2	Q9UQ35-2	1_Phospho	T1413: Phospho	AGMSSNQSISSPVLDAVPRtPSR	-0.02	0.21	0.24	0.11	0.16	-0.06	-0.25	-0.11	-0.11	-0.14	-0.17	0.47
MLLT10	P55197	1_Phospho	S370: Phospho	SSSGSSVQsPQDFLSFTDSDLR	-0.22	-0.56	-0.2	-0.53	-0.29	0.33	0.17	0.01	0.07	0.31	0.03	0.57
BIN1	O00499	1_Phospho	S331: Phospho	VNHEPEPAGGATPGATLPKsPSQLRK; VNHEPEPAGGATPGATLPKsPSQLR; VNHEPEPAGGAtPGATLPKsPSQLR	0.04	-0.24	-0.81	0.27	-0.32	-0.8	0.36	0.44	0.87	0.58	0.28	-0.93
KIF23	Q02241	1_Phospho	S160: Phospho	SNDRNsMDIQCEVDALLER	0.04	0.18	-1.07	0.35	-0.71	0.75	0.19	0.33	0.18	0.48	-0.76	-0.81
SRSF2	Q01130	1_Phospho	S26: Phospho	TsPDTLRR; SYGRPPPDVEGMTSLKVDNLTYRTsPDTLRR; TsPDTLR; VDNLTYRTsPDTLRR; VDNLTYRTsPDTLR; SYGRPPPDVEGMTSLKVDNLTYRTsPDTLR	-0.52	-0.05	-0.29	-0.05	-0.12	0.14	-0.56	-0.05	-0.3	-0.14	-0.09	-0.03
HN1	Q9UK76	1_Phospho	S87: Phospho	RNsSEASSGDFLDLK; NsSEASSGDFLDLK; RNssEASSGDFLDLK; sSEASSGDFLDLKGEGDIHENVDTDLPGSLGQSEEKPVPAAPVPSPVAPAPVPSR; NsSEASSGDFLDLKGEGDIHENVDTDLPGSLGQSEEKPVPAAPVPSPVAPAPVPSR; RNsSEASSGDFLDLKGEGDIHENVDTDLPGSLGQSEEKPVPAAPVPSPVAPAPVPSR	0.35	-0.26	-0.13	-0.7	0.13	-0.07	-0.3	0.16	0.04	0.06	-0.07	0.04
ARHGAP17	Q68EM7-7	1_Phospho	S209: Phospho	SPsPPTQHTGQPPGQPSAPSQLSAPR	-0.41	0.03	0.32	0.16	-0.37	-0.67	-0.18	0.17	0.08	-0.29	-0.3	0.16
PPIA	P62937	No Phospho		VKEGMNIVEAMER; VSFELFADKVPK; HVVFGK; KITIADCGQLE	0.32	0.68	0.84	0.43	0.51	0.46	0.21	0.42	0.3	0.19	0.09	-0.01
RAB12	Q6IQ22	1_Phospho	S21: Phospho	AGGGGGLGAGsPALSGGQGR	0.76	1.3	1.55	0.79	1.83	0.15	0.25	0.34	0.48	-0.15	0.55	0.37
BAZ2A	Q9UIF9	1_Phospho	S1783: Phospho	YSEEGLsPSKRR; YSEEGLsPSKR; YSEEGLsPSK	0.21	0.42	-0.33	-0.62	-1	0.74	-0.11	-0.68	0.34	-0.65	-0.44	0.24
CHAMP1	Q96JM3	1_Phospho	S87: Phospho	HAsPDKWNDKPK	0.39	0.02	-0.51	0.11	0.04	0.46	0.37	0.04	0.31	0.19	-0.24	-0.24
TMEM200A	Q86VY9	1_Phospho	S374: Phospho	SSMALGPGAGQLLsPGAAR	-0.39	0.09	0.45	0.18	0.23	-0.56	-0.13	-0.06	0.01	-0.2	0.19	0.26
GPBP1	Q86WP2-4	1_Phospho	S210: Phospho	SSTFPQTDVLSSsLEAEHR	0.09	0.03	-0.23	-1.05	-0.17	0.43	0.06	0.15	-0.16	0.16	-0.14	-0.19
SRRM2	Q9UQ35-2	1_Phospho	S1083: Phospho	QSHSEsPSLQSK	-0.05	-0.08	-0.21	0.12	-0.36	0.12	0.83	0.88	0.94	0.97	0.6	-0.49
GPBP1L1	Q9HC44	1_Phospho	S50: Phospho	HNSsDGFFNNGPLR	0.12	-0.08	-0.38	0.05	0.28	-0.03	-0.16	-0.07	-0.06	0.22	-0.32	0.04
ZFHX3	Q15911-2	1_Phospho	S1881: Phospho	TMELsPR	0.08	0.53	0.02	-0.05	0.01	-0.38	-0.13	-0.11	-0.28	-0.26	0.14	-0.1
FAM21C	Q9Y4E1-4	2_Phospho	S284: Phospho; S288: Phospho	RsRPTsFADELAAR	0.6	0.66	0.25	0.35	0.66	0.3	0.14	-0.86	0.26	-0.37	0.45	0
PEA15	Q15121	1_Phospho	S116: Phospho	YKDIIRQPsEEEIIK; DIIRQPsEEEIIK; QPsEEEIIK	-0.15	0.42	0.27	0.32	0.37	0.31	-0.16	0.5	0.34	0.48	0.35	0.84
DDX21	Q9NR30	1_Phospho	S71: Phospho	KKAEPSEVDMNsPK; AEPSEVDMNsPK; KAEPSEVDMNsPK	0.19	-0.2	0.45	0.35	0.02	1.19	-0.25	-0.56	-0.42	-0.27	-0.19	0.94
CDCA7L	Q96GN5	1_Phospho	S261: Phospho	AFsEGQITR	0.14	0.1	-0.3	0.01	0.11	0.12	0.01	0	0.15	-0.18	-0.15	-0.11
SUN1	O94901-4	1_Phospho	S48: Phospho	LDPVFDsPR	0.09	0.45	0.91	0.05	0.45	0.36	0.35	0.43	0.43	0.2	0.35	1.12
TCF12	Q99081-3	1_Phospho	T584: Phospho	TSStNEDEDLNPEQK	0.15	-0.33	-0.35	0.43	-0.05	1.02	0.3	0	0.12	0.25	-0.22	-0.47
MAP1B	P46821	1_Phospho	T1788: Phospho	SDISPLtPR	-1.66	-0.39	-0.27	-0.66	-0.02	-0.11	-2.53	-0.86	0.06	-0.91	-0.13	-0.36
SP100	P23497	1_Phospho	S180: Phospho	SGLQLSLEQGTGENsFR	0.52	0.07	0.87	0.5	0.57	0.44	-0.55	0.02	0.2	-0.07	-0.67	-0.19
MAP4	P27816-5	1_Phospho	S14: Phospho	ADLSLADALTEPsPDIEGEIKR; ADLSLADALTEPsPDIEGEIK	-0.26	0.72	0.33	0.14	-1.43	0.29	0.02	-0.06	-0.44	-0.29	-0.21	-0.13
RB1	P06400	1_Phospho	T356: Phospho	LFLDHDKTLQTDSIDSFETQRtPR; TLQTDSIDSFETQRtPR	-0.15	-0.04	0.49	0.45	0.22	0	-0.34	0.04	0.48	0.36	0.21	0.48
FNBP1L	Q5T0N5-4	1_Phospho	S430: Phospho	RHsSDINHLVTQGR	0.25	-0.57	-0.13	0.32	-0.01	0.07	0.32	-0.01	0.45	0.45	0.16	-0.19
WHSC2	Q9H3P2-7	1_Phospho	S100: Phospho	EASRPPEEPSAPsPTLPAQFK	-0.07	0.39	-0.27	-0.06	0.04	-0.03	-0.25	0.32	-0.36	0.02	-0.53	0.08
VCL	P18206	1_Phospho	S721: Phospho	MTGLVDEAIDTKsLLDASEEAIKK; sLLDASEEAIKK; MTGLVDEAIDTKsLLDASEEAIK; sLLDASEEAIK	-0.8	-0.15	0.02	-0.4	-1.07	-0.5	-0.52	0.4	-0.05	0.05	-0.87	0.63
ARID1A	O14497-3	1_Phospho	S1372: Phospho	VSsPAPMEGGEEEEELLGPK	0.73	1.02	0.98	0.44	0.66	-0.1	-0.35	-0.02	-0.17	0.33	-0.04	-0.19
WASF2	Q9Y6W5	1_Phospho	S474: Phospho	DVVGNDVATILsR	0.42	-0.41	0.09	0.11	0.66	-0.18	0.23	-0.14	-0.25	0.18	0.28	-0.14
PROSER2	Q86WR7-2	1_Phospho	S306: Phospho	ADsLPRPQGITVQFAGR	0.42	-0.02	-0.18	-0.29	0.67	0.13	0.05	0.09	0.52	0.08	0.5	0.47
EPB41L2	O43491	1_Phospho	T3: Phospho	TtEVGSVSEVK	0.43	-0.93	0.17	0.01	0.26	0.05	1.57	0.14	0.99	0.65	0.97	0.36
MAP4K4	O95819-2	1_Phospho	S826: Phospho	HKSSsSFTPFIDPR; SSsSFTPFIDPR	0.85	0.32	-0.06	0.51	0.37	-0.34	0.64	-0.12	0.3	0.38	0.84	-0.59
CDK3	Q00526	1_Phospho	T160: Phospho	TYtHEVVTLWYR	0.11	0.17	-0.2	0.02	-0.23	-0.14	-0.11	-0.09	0.25	0.05	0.17	-0.4
SKA3	Q8IX90-3	1_Phospho	S155: Phospho	sPQLSDFGLER; SPRsPQLSDFGLER	-0.52	-0.37	0.17	-0.26	0.3	0.44	-0.75	-0.49	-0.36	-0.01	0.26	1.81
RPS11	P62280	1_Phospho	S67: Phospho	KCPFTGNVsIR; CPFTGNVsIR; FTGNVsIR	0.06	-0.29	0.15	-0.04	0.22	-0.21	0.38	0.3	0.14	0.43	0.09	-0.3
ZNF318	Q5VUA4	1_Phospho	S653: Phospho	YFSADHCSSVDHRFsADR	-0.49	-1.35	-0.35	0.67	-0.58	0.16	-0.19	-0.17	0	-0.17	-0.32	-0.45
LMNA	P02545-3	2_Phospho	S404: Phospho	GRASsHSSQTQGGGSVTK; ASsHSSQTQGGGSVTK	1.69	0.08	1.18	-0.3	0.37	-0.27	0.2	-0.01	0.13	0.15	0.31	0.05
CAMSAP2	Q08AD1-2	1_Phospho	S904: Phospho	EQQSWVIsPPQPSPQK; EQQSWVIsPPQPsPQK	0.75	-0.01	0.45	0.66	1.01	-0.41	-0.17	-1.05	-0.31	-0.67	0.03	0.62
KRT8	P05787	1_Phospho	S35: Phospho	ISsSSFSR	0.44	0.04	-0.49	0	0.32	0.59	0.22	0.07	0.12	-0.14	0.27	-0.32
CTTN	Q14247	1_Phospho	T399: Phospho	AKtQTPPVsPAPQPTEER; tQTPPVSPAPQPTEER	0.04	0.29	-1.36	-0.05	0.2	-0.73	-0.04	-0.8	-0.23	-0.25	0.4	0.12
KAZN	Q674X7-4	1_Phospho	S293: Phospho	MGFGsISR	0.29	0.24	-0.13	0.39	0.49	0.08	0.16	0.84	-0.01	0.72	0.7	-0.12
HN1L	Q9H910	1_Phospho	S30: Phospho	AMKPPGGESSNLFGsPEEATPSSRPNR	0.09	-0.62	0.28	-0.86	0.2	0.82	-0.21	0.04	0.15	-0.11	0.06	0.61
RRP1B	Q14684-2	1_Phospho	S688: Phospho	SILVsPTGPSR	0.02	-0.34	-0.04	-0.39	0.03	0.85	0.08	-0.42	-0.11	-0.63	-0.02	0.74
SNX3	O60493	1_Phospho	S72: Phospho	RYsDFEWLR	0.47	0.54	0.33	0.48	0.81	0.25	0.58	0.77	0.61	0.58	0.97	0.55
RPL24	P83731	1_Phospho	S86: Phospho	AITGAsLADIMAK	0.62	0.37	0.21	0.24	-0.1	-0.02	0.64	0.15	-0.11	0.41	-0.38	0.28
EIF4A3	P38919	1_Phospho	T163: Phospho	KLDYGQHVVAGtPGR; LDYGQHVVAGtPGR	0.17	0.38	0.16	0.21	0.45	-0.42	-0.14	0.24	0.11	-0.14	0.33	0.31
ASPM	Q8IZT6-2	1_Phospho	S367: Phospho	ILsPDSFIK	-1.19	-0.9	0.15	-0.45	0.15	0.29	-0.19	-0.07	-0.06	0.13	0.22	1.08
TERF2IP	Q9NYB0	1_Phospho	S203: Phospho	YLLGDAPVsPSSQK	0.19	-0.15	0.46	0.17	0.02	-0.03	0.42	0.18	0.34	0.34	0.06	0.25
PRRC2A	P48634	1_Phospho	S1219: Phospho	LIPGPLsPVAR	0.35	0.23	0.1	-0.06	0.45	0.22	0.3	0.15	0.09	0	0.32	0.25
SVIL	O95425	1_Phospho	S467: Phospho	KTLLALEGDGLVRsPEDPSR; TLLALEGDGLVRsPEDPSR	-0.77	-0.69	-0.31	-0.34	-1.61	-0.75	-0.45	-0.39	-0.74	-0.61	-1.21	0.03
NOP56	O00567	1_Phospho	S570: Phospho	FSKEEPVSsGPEEAVGK; EEPVSsGPEEAVGK; KFSKEEPVSsGPEEAVGK	0.09	0.38	0.2	0.23	0.27	0.31	-0.09	-0.03	0.18	0.02	-0.08	0.43
WEE1	P30291	1_Phospho	T190: Phospho	LFDTPHtPK	0.31	-0.56	-0.82	0.06	0.4	0.41	0.48	-0.12	0.79	0.46	0.72	-0.52
MGEA5	O60502-2	1_Phospho	S848: Phospho	DVVILGRsL	0.42	0.28	0	1.51	-1.02	0.79	0.11	0.58	0.03	0.37	-1.03	0.68
HNRPLL	Q8WVV9	1_Phospho	S61: Phospho	SFsQPEAGGSHHK	-0.18	-0.1	-0.21	0.26	-0.06	0.13	0.06	-0.14	0.66	0.5	0.27	0.25
SVIL	O95425-2	1_Phospho	S221: Phospho	QAHDLsPAAESSSTFSFSGR; DLsPAAESSSTFSFSGR; QAHDLsPAAESSSTF	-0.59	-1.01	-0.78	-0.51	-0.48	0.11	0.12	0.5	0.45	0.47	0.27	0.04
SLX4	Q8IY92	1_Phospho	S1469: Phospho	sPGLLDTTPIR; DCRsPGLLDTTPIR	-0.04	-0.09	-0.2	-0.16	-0.36	-0.14	0.25	0.14	-0.42	0	-0.26	0.41
PTPN14	Q15678	1_Phospho	S831: Phospho	ERPVsEMFSLEDSIIER; VKKEPVKERPVsEMFSLEDSIIER; EPVKERPVsEMFSLEDSIIER	0.18	0.32	0.5	-0.21	-0.54	-3.35	-0.27	0.83	0.13	0.44	-0.42	-0.26
PLEKHA4	Q9H4M7	1_Phospho	S778: Phospho	VTLLQSsF	0.2	0.75	1.94	1.06	0.94	1.16	0.4	0.46	0.92	0.42	0.72	-0.41
SNRNP200	O75643-2	1_Phospho	S225: Phospho	EEAsDDDMEGDEAVVR	0.13	0.27	0.06	0.13	0.08	0.27	-0.03	-0.12	-0.07	-0.04	-0.12	0.08
TCF20	Q9UGU0	1_Phospho		SLTPPPSSTESK; SASSNSAEAGGDTVTLDDILSLK; AGSSPAQGAQNEPPRLNASPAAR	-0.02	0.1	0.3	-0.05	-0.09	0.1	0.78	1.02	1.22	0.33	0.75	0.82
DTL	Q9NZJ0	1_Phospho	S526: Phospho	IMsPR	0.12	0	-0.26	-0.06	-0.23	0.42	-0.07	-0.22	-0.26	-0.11	-0.22	0.15
EPRS	P07814	1_Phospho	S886: Phospho	TGKEYIPGQPPLSQSSDSsPTR; EKTGKEYIPGQPPLSQSSDSsPTR; EYIPGQPPLSQSSDSsPTR	0.02	0.05	0.07	-0.06	-0.14	0.08	-0.04	-0.13	-0.03	-0.26	-0.24	0.04
USP24	Q9UPU5	1_Phospho	S2561: Phospho	TIsAQDTLAYATALLNEK; TIsAQDTLAYAtALLNEKEQSGSSNGSESSPANENGDR; TIsAQDTLAY; TIsAQDTLAYATALLNEKEQSGSSNGSESSPANENGDR	-0.1	0.7	0.51	0.44	0.06	0.04	-0.1	0.23	0.07	0.16	-0.02	0.08
MED24	O75448-2	2_Phospho	S860: Phospho	LLSSNEDDANILSsPTDR	0.41	0.67	1.13	-0.39	0.98	1.09	0.09	-0.36	-1.12	-0.5	-0.07	0.54
EHD4	Q9H223	1_Phospho	S459: Phospho	DKPVYDELFYTLsPINGK	-0.05	-0.44	-0.67	-0.05	-0.03	-0.37	-0.15	0.38	0.38	0.13	0.7	0.5
PPIG	Q13427	1_Phospho	S687: Phospho	DQsPFSK; KADRDQsPFSK; ADRDQsPFSK	-0.17	-0.11	-0.51	-0.28	-0.07	-0.25	0.12	0.16	-0.12	0.05	0.19	-0.22
GAPDH	P04406	1_Phospho	S210: Phospho	GALQNIIPAsTGAAK	0.05	-0.08	0.34	-0.29	-0.23	0.68	0.19	0.38	0.17	0.29	0.08	0.04
PDS5B	Q9NTI5-2	1_Phospho	S1166: Phospho	METVSNASSSSNPSsPGR	-0.07	-0.07	0	0.01	-0.21	-0.16	0.36	0.15	0.34	0.31	0.18	0.05
PSEN1	P49768-3	1_Phospho	S39: Phospho	sLGHPEPLSNGRPQGNSR	-0.15	0.57	0.95	0.02	0.37	-0.01	-0.01	0.05	-0.11	-0.24	-0.5	0.29
EPS15L1	Q9UBC2-2	1_Phospho	S229: Phospho	KTVFPGAVPVLPAsPPPKDSLR; TVFPGAVPVLPAsPPPK; TVFPGAVPVLPAsPPPKDSLR	0.08	-0.43	-0.04	0.18	0.12	0.33	-0.14	0.01	-0.38	0	0.07	0.24
RSF1	Q96T23-2	1_Phospho	S573: Phospho	TFLDKDAQRLsPIPEEVPK; LsPIPEEVPK; DAQRLsPIPEEVPK	0.01	0.22	-0.07	-0.2	-0.35	-0.32	0.21	0.4	-0.37	0.31	-0.35	0.33
WWC2	Q6AWC2-4	1_Phospho	S269: Phospho	CsPVNSHLCLSR; SEPDLRCsPVNSHLCLSR	0.05	0.2	-0.16	-0.01	0.01	0.13	-0.06	0.37	-0.05	0.23	-0.56	-0.2
NOLC1	Q14978	2_Phospho	T607: Phospho; T610: Phospho	LQtPNtFPK; IKLQtPNtFPK	-0.17	-0.2	-0.25	-0.34	-0.34	0.96	-0.45	-1.04	-0.34	-1.15	-0.4	0.55
TLN1	Q9Y490	1_Phospho	S1225: Phospho	LLsDSLPPStGTFQEAQSR; RLLsDSLPPSTGTFQEAQSR; LLsDSLPPSTGtFQEAQSR; LLsDSLPPSTGTFQEAQSR	0.07	-0.29	-0.86	-0.03	-0.22	-0.58	-0.09	-0.2	-0.73	-0.13	0.04	-0.45
LARP7	Q4G0J3	1_Phospho		SSSEDAESLAPR	-0.35	0.19	-0.19	0.5	0.21	0.77	-0.57	-0.2	-1.23	-1.43	-0.52	-0.2
SRRM2	Q9UQ35-3	1_Phospho	S257: Phospho	SATRPSPsPER	-0.32	0.35	0.47	0.17	-0.37	0.27	-0.02	-0.04	0.48	0.35	-0.36	0.3
FAM114A1	Q8IWE2	1_Phospho	S261: Phospho	TVsLSQMLR	0.98	0.96	0.67	0.79	0.86	-0.95	0.76	0.91	0.57	0.54	0.53	-0.45
RANBP2	P49792	1_Phospho		SISSPSVSSETMDKPVDLSTR; ELVGPPLAETVFTPKTSPENVQDR; HSTPSPTR	0.08	0.03	-0.55	-0.79	-0.15	-0.4	0.23	0.41	0.27	-0.02	0.47	0.42
AKAP11	Q9UKA4	1_Phospho	T1100: Phospho	NVIPDtPPSTPLVPSR; DRNVIPDtPPSTPLVPSR	0.32	0.33	0.71	0.71	0.25	-0.3	0.03	0.37	0.39	0.28	0.29	0.01
SSFA2	P28290	1_Phospho	S1040: Phospho	MPsPFR	0.04	-0.05	0.11	-0.57	0.15	-1.04	0.27	0.15	0.27	-0.71	0.17	-0.41
SGOL1	Q5FBB7	1_Phospho	S256: Phospho	DQVNLsPK	-0.19	-0.12	0	0.13	-0.03	0.22	-0.4	-0.25	0.21	-0.09	0.02	0.4
GPKOW	Q92917	1_Phospho	T216: Phospho	GLGLGANLTEAQALtPTGPSR	0.26	-0.36	0.15	-0.2	-0.18	0.47	-0.26	-0.25	-0.07	-0.39	0.11	0.42
SPECC1	Q5M775-4	1_Phospho	S766: Phospho	sPLSGIPVR; TPRsPLSGIPVR	0.43	-0.11	0.87	0.32	0.14	0.63	-0.85	0.02	0	-0.37	-0.44	0.96
MAP1B	P46821	1_Phospho	S743: Phospho	SsTPLSEAK	-1.62	-0.6	-0.65	-0.68	0.1	0.28	-2.11	-0.79	-0.59	-1.11	-0.01	-0.48
CD44	P16070-15	No Phospho		TNPEDIYPSN; QIDLNITCR; TSVTDLPNAFDGPITITIVNR	-0.3	0.25	-0.23	-0.88	0.22	0.01	0.11	0.04	-0.61	-0.48	-0.57	0.05
ZC3H13	Q5T200	1_Phospho	S1366: Phospho	LISDsVER	0.02	-0.02	0.08	-0.06	0.07	-0.04	0.07	-0.19	-0.38	-0.19	-0.14	0.46
ATRX	P46100-2	1_Phospho	S112: Phospho	VYEHTSRFsPK	-0.08	-0.21	-0.33	0.14	-0.16	0.07	-0.15	-0.05	-0.36	0.04	-0.11	-0.09
FBXO4	Q9UKT5	1_Phospho	T10: Phospho	SGtNSPPPPFSDWGR	0.39	0.56	0.53	0.56	-0.35	-0.85	0.2	0.43	0.22	0.05	-0.64	-0.46
RPL23	P62829	1_Phospho	S138: Phospho	IASNAGsIA	0.28	0.03	0.03	-0.05	0.02	-0.09	0.17	-1.1	-0.29	-0.48	-0.33	-0.49
CDCA3	Q99618	1_Phospho	S94: Phospho	QLsEVFETEDSK	-0.34	-0.14	0.45	0.27	-0.13	0.6	-0.23	0	0.09	0.19	-0.36	1.25
SEPT9	Q9UHD8-7	1_Phospho	T23: Phospho	SFEVEEVETPNStPPRR	0.23	-0.13	0.24	0.36	0.25	0.31	-0.09	-0.72	-0.64	-1.22	-0.79	0.19
NFIL3	Q16649	1_Phospho	S301: Phospho	GPIHsPVELK	0.09	0.02	0.23	0.43	0.15	0.21	-0.04	-0.33	0.21	0.01	-0.14	0.23
SPTBN1	Q01082	1_Phospho	S2341: Phospho	AQTLPTSVVTITSESsPGK; AQTLPTSVVTITSESsPGKREK; AQTLPTSVVtITSESsPGKR; AQTLPTSVVTITSESsPGKR; AQTLPtSVVTITSESsPGKR	-0.31	-0.67	0.19	0.38	-0.91	0.34	-0.24	-0.04	0.14	-0.05	-0.78	0.18
ZNF609	O15014	2_Phospho	S576: Phospho	LVEPHsPSPSSK	-0.19	-0.03	0.26	-0.32	-0.28	-0.05	0.24	-0.19	-0.52	-0.37	-0.2	0.43
PXN	P49023	1_Phospho		TGSSSPPGGPPKPGSQLDSMLGSLQSDLNK; TGSSSPPGGPPKPGSQLDSMLGSLQSDLNKLGVATVAK; SAEPSPTVMSTSLGSNLSELDR; FIHQQPQSSSPVYGSSAK; VTSTQQQTRISASSATR	0.27	0.17	2.13	-0.99	0.02	-0.5	-1.65	-1.63	-1.77	-3.35	-2.25	3.48
VGLL4	Q14135	1_Phospho	S52: Phospho	TGPPPIsPSKR; TGPPPIsPSK; TGPPPIsPSKRK	0.16	-0.14	0.06	0.19	0.31	-0.62	0.19	-0.05	0.04	0.2	0.3	-0.4
MAP7D1	Q3KQU3	1_Phospho	T97: Phospho	GPtPPAMGPR	-0.29	0.02	-0.14	0.01	0.07	0.08	-0.43	0.14	-0.44	0.09	0	0.34
MAP4	P27816-5	1_Phospho	S423: Phospho	ELPPsPEKK	-0.58	0	0.31	-0.24	0.04	0.37	-0.38	0.08	-0.03	0.08	0.07	0.92
PARN	O95453	1_Phospho	S557: Phospho	NNsFTAPSTVGKR	0.64	-0.37	-1.97	0.39	0.2	0.54	0.85	1.08	0.78	0.58	0.34	-1.34
PRRC2A	P48634-4	1_Phospho	S1489: Phospho	VDLYQQAsPPDALR	-0.16	-0.15	0.35	-0.07	0.04	0	0.6	0.66	0.76	0.22	0.6	0.09
ITSN1	Q15811	1_Phospho	S315: Phospho	SGsGISVISSTSVDQR	2.17	1.01	0.78	1.14	0.11	-0.42	0.7	0.46	0.46	0.39	0.32	-0.38
CDC42EP1	Q00587-2	2_Phospho	S343: Phospho	AsWESLDEEWR	0.05	0.16	-0.11	0.18	-0.27	0.52	0.24	-0.88	-0.49	0	-0.13	-0.12
FLNA	P21333-2	1_Phospho	S2319: Phospho	FNEEHIPDSPFVVPVAsPSGDAR	-0.75	0.77	0.06	0.42	0.58	0.23	-0.28	-0.3	0.03	-0.14	0.09	-0.05
ABI2	Q9NYB9-3	1_Phospho	S132: Phospho	TTPPTQKPPsPPMSGK	0.29	0.19	0.31	0.2	-0.27	-0.62	0.39	0.5	0.27	0.35	-0.01	0.03
TPD52L2	O43399	1_Phospho	S166: Phospho	NSATFKsFEDR; NSAtFKsFEDR	0.33	0.38	0.49	0.39	0.58	0.21	0.29	0.54	0.64	0.23	0.62	0.24
MCM2	P49736	1_Phospho	S41: Phospho	TDALTSsPGR; RTDALTSsPGR; TDALtSsPGR	-0.32	0.65	-1.49	-0.2	-0.43	-0.74	-0.07	0.42	-1.16	0.1	-0.52	-0.26
TOB1	P50616	1_Phospho	S205: Phospho	TsPINLGLNVNDLLK	0.15	0.88	0.66	0.65	0.32	-0.15	0.02	0.82	0.34	0.14	0.23	0.05
MAP1S	Q66K74	1_Phospho	S472: Phospho	AEsKESVGSR; FLREPVVTPQDLEGPGRAEsK	-0.04	0.21	0.13	-0.28	0.25	-0.53	0.11	-0.15	0.41	0.15	0.41	-0.28
MAP1B	P46821	1_Phospho	S1396: Phospho	VLsPLR; VLsPLRSPPLIGSESAYESFLSADDK	-2.28	-0.23	0.07	-0.71	-0.17	-0.65	-2.28	-0.25	-0.13	-0.69	-0.29	0.11
SRRM1	Q8IYB3-2	1_Phospho	S899: Phospho	KAQVsPQS	0.11	-0.07	0.44	-0.29	-0.58	-0.16	0.22	-0.11	0.01	0.3	-0.33	0.39
FOSL1	P15407	1_Phospho	S101: Phospho	RPCEQIsPEEEER; RPCEQIsPEEEERR	0.84	0.13	0.41	0.47	0.7	0.79	0.65	-0.55	0.4	0.09	0.59	0.44
EP400	Q96L91-5	1_Phospho	S699: Phospho	ALsPVTSR	0.06	0.14	-0.09	0.14	-0.1	0.11	-0.05	-0.08	-0.08	0.12	-0.24	0.05
FGD6	Q6ZV73	1_Phospho	S515: Phospho	AAsEELLEK	-0.17	-0.01	0.05	-0.3	-0.16	-0.09	-0.45	-0.12	-0.17	-0.52	-0.47	0.27
RAI14	Q9P0K7-3	1_Phospho	S282: Phospho	KAPPPPISPTQLSDVSsPR; QLSDVSsPR	-1.11	-0.01	0.09	-0.09	-0.32	0.15	-1.44	-0.22	-0.28	-0.09	-0.64	0.34
LARP4B	Q92615	1_Phospho	S568: Phospho	TLsADASVNTLPVVVSR	0.83	0.67	0.26	-0.58	0.66	0.19	0.51	0.15	-0.02	0.13	0.72	0.22
ATXN2	Q99700-2	2_Phospho	T666: Phospho; S684: Phospho	tSPSGGTWSSVVSGVPRLsPK	1.81	1.22	0.39	0.32	0.82	1.04	0.15	0.09	0.25	-0.17	0.31	0.15
RPL15	P61313	1_Phospho	S97: Phospho	sLQSVAEER	0.04	0.27	-0.1	0.16	-0.19	-0.13	-0.04	0.15	-0.41	-0.16	-0.35	0.18
ODF2	Q5BJF6-4	1_Phospho		SSTPPLHVHVDENTPVHVHIK	-0.05	-0.63	-0.67	-0.33	-0.58	-0.42	0.17	-0.82	-1.14	-1.02	-0.28	0.04
OTUD5	Q96G74-3	1_Phospho	S503: Phospho	ATsPLVSLYPALECR	0.31	0.58	-0.18	0.76	-0.14	-0.19	-0.06	0.24	-0.04	-0.04	-0.32	-0.35
TNKS1BP1	Q9C0C2-2	1_Phospho	S480: Phospho	DAGRPGERGSGGLFsPSTAHVPDGALGQR; GSGGLFsPSTAHVPDGALGQR	0	-0.06	0.14	-0.02	-0.08	0.58	0.04	0.13	0.24	0	-0.29	0.47
DDX10	Q13206	1_Phospho	S7: Phospho	TANsPGSGARPDPVR; GKTANsPGSGARPDPVR	-0.32	-0.51	-0.18	-0.28	-0.32	0.77	-0.36	-0.71	-0.27	-0.76	0.1	0.23
SERBP1	Q8NC51-2	1_Phospho	T226: Phospho	GGSGSHNWGTVKDELtESPKYIQK; DELtESPK	0.24	-0.36	-0.02	-0.51	0.31	0.07	0.5	-0.06	0.08	-0.06	0.61	0.19
SNRK	Q9NRH2	1_Phospho	S362: Phospho	AQFRQsWPTK	1.24	-0.1	0.72	-0.67	1.09	0.14	1.32	0.8	0.81	0.26	1.21	0.28
PTBP1	P26599	1_Phospho	S141: Phospho	ELKTDSsPNQAR	0.16	0.24	0.08	0.05	0.04	0.17	0.05	0.08	0.09	0.04	0.25	0.19
CIT	O14578-4	1_Phospho	S480: Phospho	RVsEVEAVLSQK	0.34	0.84	0.4	0.66	0.25	1.26	0.02	0.35	0.46	0.34	-0.36	0.44
IRS2	Q9Y4H2	1_Phospho	T350: Phospho	TDSLAAtPPAAK	0.21	0.17	-1.12	0.2	0	-0.16	0.58	1.14	-0.16	0.71	-0.35	-0.41
PTPN14	Q15678	1_Phospho	S512: Phospho	LVsPSDQR	-0.08	0.39	0.21	0.31	0	0.39	-0.6	0.05	-0.1	0.08	-0.2	0.48
HNRNPU	Q00839	1_Phospho	S271: Phospho	sPQPPVEEEDEHFDDTVVCLDTYNCDLHFK; AKsPQPPVEEEDEHFDDTVVCLDTYNCDLHFK	0.5	-0.85	0.23	0.45	-0.26	-0.45	0.2	0.15	-0.1	0.36	0.2	-0.04
MARCKS	P29966	1_Phospho	S147: Phospho	AEDGATPSPsNETPKK; AEDGATPSPsNETPK; AEDGATPSPsNETPKKK	0.12	0.01	-0.39	0.07	0.04	0.22	0.27	-0.05	-0.09	0.04	0.38	0.28
TIAM1	Q13009	1_Phospho	S1407: Phospho	TEsLPSSQQYVPFGGKR	-0.93	-0.75	-0.63	0.04	-0.6	-0.27	-0.08	-0.61	0.5	-0.59	-0.33	-0.59
RPL34	P49207	1_Phospho	S12: Phospho	RLsYNTASNK	0.07	-0.02	0	0.28	-0.66	-0.31	0.52	0.26	0.61	0.8	0.08	0.03
BCLAF1	Q9NYF8	1_Phospho	S385: Phospho	AEGEWEDQEALDYFsDK; AEGEWEDQEALDYFsDKESGK; AEGEWEDQEALDYFsDKESGKQK	-1.36	-0.58	-0.29	-0.84	-0.36	-0.1	-0.32	0.09	0.03	0.31	0.2	0.51
SRRM2	Q9UQ35	1_Phospho	T2104: Phospho	NHSGSRtPPVALNSSR; tPPVALNSSR	-0.69	-0.03	-0.44	-0.45	-0.27	0.32	-0.26	0.37	-0.56	0.35	-0.26	0.4
MGRN1	O60291	1_Phospho	S524: Phospho	AASIENVLQDSsPEHCGR	-0.44	0.43	-0.16	0.01	-1.49	1.07	-0.2	0.07	-0.37	-0.05	-0.06	0.58
MLF2	Q15773	1_Phospho	S238: Phospho	LAIQGPEDsPSR	0.19	0.03	0.13	-0.06	0.1	0.4	0.13	0.25	0.03	-0.1	0.22	0.56
AKAP13	Q12802	1_Phospho	S2498: Phospho	RTEsDSGLK	0.06	0.36	0.08	0.18	-0.57	0.06	-0.05	0.01	-0.04	0.07	0	0.15
IGF2BP3	O00425	1_Phospho	S438: Phospho	FAGAsIK	0.54	0.21	0.12	0.36	0.55	-0.49	0.43	0.21	0.16	0.2	0.16	0.27
DMWD	Q09019	1_Phospho	S495: Phospho	SNsLPHPAGGGK	0.23	0.17	-0.11	0.01	-0.3	-0.25	0.28	0.11	0.06	-0.41	0.11	-0.19
USP24	Q9UPU5	1_Phospho	S1141: Phospho	TLLSESSSQSSKsPSLSSK; sPSLSSK	-0.15	0.16	0.17	0.24	-0.16	-0.03	0.06	0.37	0.19	0.12	0.15	0.52
CALD1	Q05682-6	1_Phospho	T409: Phospho	CFtPK	-0.41	-0.54	-0.47	-0.7	-0.3	0.84	-1.09	-0.58	-0.96	-0.94	-0.01	0.65
LARP1	Q6PKG0-3	1_Phospho	S697: Phospho	SLPTtVPEsPNYR; SLPTTVPEsPNYRNTR; SLPTTVPEsPNYR	-0.27	-0.04	-0.23	-0.13	-0.02	-0.32	-0.38	-0.11	-0.89	-0.27	-0.03	-0.24
MAP1B	P46821	1_Phospho	S1852: Phospho	DLsTPGLEK	-0.55	0.38	0.03	-0.21	0.19	0.15	-1.77	-0.17	0.58	-1.53	0.46	0.86
BAG6	P46379-2	1_Phospho	S967: Phospho	ASPEPQRENAsPAPGTTAEEAMSR; ENAsPAPGTTAEEAMSR	-0.17	0.36	-0.02	-0.12	0.26	-0.22	0.02	-0.02	-0.74	-0.18	0.22	0.66
MYO18A	Q92614-3	1_Phospho	S140: Phospho	RFsFSQR	0.52	0.37	-0.34	0.59	-0.77	0.37	0.59	0.55	0.28	0.46	-1.26	-0.06
NUP93	Q8N1F7	2_Phospho	S72: Phospho; S75: Phospho	GLDIsHIsQR	-0.01	-0.04	0.29	0.33	-0.54	-0.67	-0.06	0	0.35	0.48	-0.62	-0.04
TJAP1	Q5JTD0-4	1_Phospho	S225: Phospho	GsPEEELPLPAFEK	0.01	0.29	0.02	-0.02	-0.02	-0.06	0.1	-0.06	-0.07	-0.05	0.15	0.78
MICALL1	Q8N3F8	1_Phospho	S621: Phospho	GSSGPQPAKPCSGATPTPLLLVGDRSPVPSPGSSsPQLQVK; SPVPSPGSSsPQLQVK	0.08	0.02	0.03	0.15	0.31	0.65	-0.11	0.03	-0.1	-0.55	-0.09	0.36
EIF5B	O60841	1_Phospho	S164: Phospho	KWDGsEEDEDNSKK; KWDGsEEDEDNSK; WDGsEEDEDNSK; WDGsEEDEDNSKK	-0.14	-0.28	-1.1	-0.22	-0.24	0.42	0.23	-0.19	0.23	0.09	0.27	-0.62
PNPLA6	Q8IY17-3	1_Phospho	S411: Phospho	CVsMPGDISGLQGGPR	0.63	1.38	0.02	0.34	0.65	0.62	0.4	0.9	0.77	-0.25	-0.19	0.35
AKAP1	Q92667	1_Phospho	S444: Phospho	SLLsSPTK	-0.5	-0.54	-0.26	-0.06	-0.11	-0.1	-0.84	0	-0.27	-0.39	-0.04	0.91
SLU7	O95391	1_Phospho	S215: Phospho	LVEQANsPK	0.04	0.13	-0.18	0.13	-0.18	0.15	-0.15	0.22	-0.3	-0.04	0.12	0.28
AKT1S1	Q96B36	2_Phospho	S88: Phospho	AATAARPPAPPPAPQPPsPTPSPPRPTLAR	-0.47	-0.04	-0.53	-1.11	-0.76	1.44	0.05	-0.25	-0.63	-1.14	-0.66	0.25
EFHD2	Q96C19	1_Phospho		ADLNQGIGEPQSPSR	-0.22	0.47	-0.22	-1.11	0.2	-0.52	0.79	0.51	0.32	0.39	0.72	0.56
APBB2	Q92870-2	1_Phospho	T34: Phospho	NSPAtPPNTLNLR	0.06	-0.25	-0.17	-0.12	-0.01	0.1	-0.21	-0.46	-0.48	-0.65	-0.23	-0.14
SLC9A3R1	O14745	1_Phospho	S280: Phospho	EALAEAALEsPRPALVR	-0.1	-0.1	-0.02	-0.3	0.03	0.66	-0.73	-0.17	-0.67	-1.17	-0.1	0.83
KDM3A	Q9Y4C1	1_Phospho	S463: Phospho	AGVNSDsPNNCSGK	0.1	0.43	0.64	0.35	0.53	-0.36	-0.73	0.1	-0.08	-0.07	0.33	-0.17
EEF2K	O00418	1_Phospho	S18: Phospho	LEGVDGGQsPR	0.06	0.26	0.23	0.1	-0.97	-0.17	-0.04	0.28	0.07	-0.14	-1.01	-0.07
MYC	P01106-2	2_Phospho	T73: Phospho; S77: Phospho	FELLPtPPLsPSRR; FELLPtPPLsPSR; KFELLPtPPLsPSRR	0.16	0.03	-0.32	0.01	-1.37	0.95	0.01	-0.25	-0.87	-0.02	-0.76	0.87
CCNL2	Q96S94-3	1_Phospho	S126: Phospho	GSKPsPLSVK	-0.62	-0.28	0.28	-0.5	-0.04	-0.48	-0.5	0.25	0.18	-0.42	0.18	0.11
RANBP3	Q9H6Z4	1_Phospho		TSSLTQFPPSQSEER; SAGGSSPEGGEDSDREDGNYCPPVKR	-0.87	-0.11	-1.02	0.15	-0.09	1.33	0.37	-0.53	-0.26	0.16	-0.27	0.16
TSC22D4	Q9Y3Q8	1_Phospho		FSLAHSMLAISGHLDSDDDSGSGSLVGIDNK; VEAEAGGSGARTPPLSR	0.61	1.1	0.99	0.44	0.45	0.07	0.52	0.77	0.41	-0.26	0.57	-0.18
TNS1	Q9HBL0	1_Phospho	S1192: Phospho	TVGTNTPPsPGFGWR; TVGTNtPPsPGFGWR	-1.32	-0.34	0.01	-0.9	-0.07	-0.46	-0.87	-0.39	-0.09	-0.82	-0.06	-0.08
USP16	Q9Y5T5-2	1_Phospho	S551: Phospho	NINMDNDLEVLTSsPTR	-0.11	0.13	-0.03	-0.35	-0.12	0	-0.51	-0.24	-0.19	-0.37	0.05	0.37
RPS6KB1	P23443-2	1_Phospho	S424: Phospho	TPVsPVKFSPGDFWGR	-0.09	-0.34	-0.2	0.25	-0.4	0.04	0.06	0.37	0.17	0.44	0.06	-0.17
EIF4G1	Q04637	2_Phospho	S1145: Phospho; S1147: Phospho	VVQRSsLsRER	0.29	-0.74	0	-0.09	-0.6	-0.05	1.09	0.99	1.42	0.46	0.68	-0.87
SPTBN1	Q01082	1_Phospho	T2331: Phospho	AQTLPtSVVTITSESSPGKR	-0.27	-0.51	-0.49	-0.03	-1.35	-0.42	0.54	0.19	0.59	0.67	0.34	-0.34
STK10	O94804	1_Phospho	S392: Phospho	SLQTTsPPVVAPGNENGLAVPVPLRK	-0.49	0.25	-0.3	-0.36	0.22	1.18	-0.41	-0.98	-0.75	-0.98	-0.28	1.08
COPRS	Q9NQ92	1_Phospho	S61: Phospho	GTQsIPNDSPAR	0.04	0.04	0.11	0.41	-0.18	0.27	0.46	0.44	0.29	0.61	-0.41	1.18
OSBPL6	Q9BZF3	1_Phospho	S190: Phospho	QNEIVRsPR	0.26	0.18	0.13	0.18	0.16	0	0.27	-0.08	-0.11	-0.08	0.2	0.02
CHD4	Q14839-2	1_Phospho	S1563: Phospho	KMSQPGsPSPK; MSQPGsPSPK	0.03	0.02	0.14	0.04	-0.13	0.16	0.03	0.04	-0.03	0.09	-0.02	0.09
FXR2	P51116	1_Phospho	S601: Phospho	TDGsISGDRQPVTVADYISR	0.2	0.05	-1.06	0.29	0.1	0.08	0.28	0.33	0.02	0.37	0.11	-0.42
SRGAP1	Q7Z6B7	1_Phospho	S926: Phospho	HDsLKK	0.2	0.11	-0.44	-0.22	-0.83	-0.39	-0.01	0.27	-0.03	-0.09	-0.06	-1.25
NUMB	P49757-4	1_Phospho	S183: Phospho	EGsFRVTTATEQAER	-0.08	0.11	-0.79	0.09	0.49	0.11	0.07	-0.09	-0.23	0	0.21	-0.81
MKL1	Q969V6	1_Phospho		FGSTGSTPPVSPTPSER; QNSTSLTGKPGALPANLDDMK	0.04	0.4	0.07	0.54	-0.2	0.15	-0.31	0.5	0.58	-0.31	-0.71	1.37
MKI67	P46013-2	2_Phospho	S219: Phospho; S224: Phospho	AQSLVIsPPAPsPR	-0.08	-0.19	0.12	0.09	0.21	0.98	-0.17	-0.22	-0.09	0.43	-0.04	0.31
CDK12	Q9NYV4	1_Phospho	T893: Phospho	LYNSEESRPYtNK	0.29	-0.11	-0.03	-0.15	0.07	-0.3	0.02	0.23	-0.04	-0.13	0.04	0.09
FGD6	Q6ZV73	1_Phospho	S721: Phospho	AEsLDDQMLSR	-0.42	-0.49	0.05	-0.41	-0.59	-0.1	-0.33	-0.41	-0.18	-0.55	-0.64	0.13
SSH2	Q76I76	1_Phospho	T1422: Phospho	TTNPFYNtM	-0.02	-0.03	-0.01	-0.32	-0.23	-0.08	0.26	-0.04	-0.29	-0.6	-0.2	-0.13
LRWD1	Q9UFC0	1_Phospho	S251: Phospho	ACAsPSAQVEGSPVAGSDGSQPAVK	1.03	-0.41	0.81	0.24	0.28	0.37	0.55	0.67	0.36	0.47	0.23	0.49
KSR1	Q8IVT5	1_Phospho	S404: Phospho	TEsVPSDINNPVDR	-1.18	0.71	-0.47	0.77	0.01	2.58	-0.38	0.02	-0.66	0.63	0.04	0.6
SH3BP4	Q9P0V3	1_Phospho	S246: Phospho	SYsLSELSVLQAK	0.09	0.84	0.73	0.85	-0.18	0.38	-0.38	0.35	0.08	0.48	-0.66	0
OSTM1	Q86WC4	1_Phospho		SSTSFANIQENSN	0.53	0.8	0.59	0.08	0.49	0.19	0.23	0.4	-0.51	0.65	0.04	0.12
TNKS1BP1	Q9C0C2	1_Phospho	S1383: Phospho	HNGsLsPGLEAR; HNGsLSPGLEARDPLEAR; HNGsLSPGLEAR	-0.09	-0.7	-1.89	0.18	0.2	-0.51	-0.09	-0.78	-0.03	-0.54	0.07	-0.86
BMS1	Q14692	1_Phospho	S552: Phospho	AGLsPANCQSDR; AGLsPANCQSDRVNLEK	-0.24	-0.38	-0.09	-0.09	-0.23	0.32	-0.43	-0.29	-0.21	0.18	-0.28	0.43
VIM	P08670	1_Phospho	S5: Phospho	sVSSSSYR	0.83	0.23	0.67	-0.5	0.65	0.11	1.01	0.2	0.65	0.03	0.85	-0.27
BAIAP2	Q9UQB8	1_Phospho	S325: Phospho	SLsPPQSQSK	0.25	-0.34	0.13	0.26	-0.11	0.31	0.08	-0.27	0.16	0.34	-0.1	0.27
MICAL3	Q7RTP6-5	1_Phospho	S685: Phospho	RKTsQSEEEEAPR; KTsQSEEEEAPR	-0.18	0.4	-0.05	0.08	-0.3	0.42	-0.12	0.09	0.38	0.15	-0.37	-0.52
SH3PXD2A	Q5TCZ1-3	1_Phospho	S393: Phospho	AQISsPNLR	1.12	1.04	0.94	0.12	1.16	-0.81	0.88	0.72	0.52	-0.23	0.74	-0.39
MLL2	O14686-3	1_Phospho	S4741: Phospho	ALsPVIPLIPR	0.28	0.16	0.1	0.03	0.07	-0.19	0.31	0.07	-0.32	-0.01	-0.22	0.15
HUWE1	Q7Z6Z7	1_Phospho	S2365: Phospho	DGGSGNsTIIVSR	0.16	0.21	-0.43	-0.15	0.15	0.59	0.06	0.11	-0.33	-0.13	-0.76	0.05
INCENP	Q9NQS7	1_Phospho	S275: Phospho	DSPAFPDsPWRER; DSPAFPDsPWR	0.14	0.27	0.26	0.13	-0.2	0.56	-0.01	0.16	0.23	0.13	-0.54	0.47
HTATSF1	O43719	1_Phospho	S403: Phospho	HFsEHPSTSK	0.71	0.74	0.19	0.42	0.65	0.31	0.61	0.35	0.15	0.44	0.53	-0.45
UBA6	A0AVT1-2	1_Phospho	S477: Phospho	NGIsFTIWDR; IRNGIsFTIWDR	0.66	2.42	1.52	2.07	0.86	-0.56	0.1	0.65	0.63	0.72	-0.45	0.04
RHPN2P1	A8MT19	1_Phospho	T503: Phospho	SAtYSVGMQK	-0.44	-0.32	-0.16	-0.03	-0.11	0.01	-0.23	-0.11	0.24	-0.12	0.05	0.02
LEMD2	Q8NC56	1_Phospho	S166: Phospho	RWWAAsPAPAR; WWAAsPAPAR	0.11	0.29	-0.2	-0.25	-0.79	-0.13	0.01	-0.71	-0.29	-1.29	-0.5	1.02
WDR13	Q9H1Z4	1_Phospho	S70: Phospho	YGPLsEPGSAR	0.53	0.13	0.45	-0.04	0.08	-0.86	0.76	0.37	0.43	0.08	0.22	-0.74
PPP1R3D	O95685	1_Phospho	S46: Phospho	ACRPPGsPGRAPPPTPAPSGCDPR	0.34	-1.91	0.5	-0.1	0.08	0.31	0.24	-0.28	0.59	-0.25	-0.1	-0.01
SIPA1L1	O43166-2	1_Phospho	S1249: Phospho	QDPVVHLsPNK	0.07	-0.15	-0.02	-0.22	0.22	-0.25	-0.54	-0.31	-0.13	-0.38	-0.22	0.04
CHD7	Q9P2D1	1_Phospho	S2559: Phospho	NIPsPGQLDPDTR	-0.23	0.07	-0.06	-0.55	-0.37	0.25	-0.39	-0.58	-0.64	-0.78	-0.85	0.02
UBR1	Q8IWV7	1_Phospho	T21: Phospho	MEISAELPQtPQR	0.35	0.45	0.19	0.24	0.2	-0.22	-0.13	-0.41	-0.08	-0.99	-0.05	0.92
KLC4	Q9NSK0	1_Phospho	S590: Phospho	AAsLNYLNQPSAAPLQVSR	-0.13	0.22	-0.05	-0.23	-0.49	-0.07	-0.01	-0.17	-0.31	-0.29	-0.67	-0.12
ZDHHC14	Q8IZN3	1_Phospho	S455: Phospho	LLAAGsPLAHSR	0.21	-0.57	-0.07	0.37	0.19	0.42	-0.25	-0.86	-0.58	0	-0.46	0.4
GPS1	Q13098	1_Phospho	S474: Phospho	SPPREGsQGELTPANSQSR; EGsQGELTPANSQSR; NQIHVKSPPREGsQGELTPANSQSR	0.26	-0.21	0.03	-0.01	0.11	0.29	0.49	-0.01	0.59	0.22	0.35	-0.44
TNKS1BP1	Q9C0C2-2	1_Phospho		SFGTRPLSSGFSPEEAQQQDEEFEK; DVSLGDWEFGKRDSLGAYASQDANEQGQDLGK; DYSSGGSSRTLDAQDR; DAELQDQEFGKRDSLGTYSSR; TTAGSVDWTDQLGLR; GAGAELKDTQSPSTCSEGLLGWSQK	0.79	0.43	-0.27	0.33	0.47	-0.54	0.3	0.26	0.21	-0.51	0.06	-0.19
NEXN	Q0ZGT2-4	1_Phospho	S16: Phospho	EMLAsDDEEDVSSK; EMLAsDDEEDVSSKVEK; AEIKEMLAsDDEEDVSSK	-0.57	-0.53	-0.24	-0.18	-0.64	0.51	-0.66	-0.7	-0.6	-0.54	-0.48	0.33
SPECC1	Q5M775-4	1_Phospho	S729: Phospho	TsPTPPESATTVK	-0.45	0.13	0.14	0.12	-0.08	-0.1	-0.27	0.23	0.03	-0.1	-0.33	0.1
NBAS	A2RRP1-2	1_Phospho	S1817: Phospho	KRNsEDEAQEAK	0.28	0.11	0.27	0.29	-0.38	0.09	0.3	-0.36	0.14	0.08	0.06	-0.03
BIN1	O00499-2	1_Phospho	S272: Phospho	SPSPPDGsPAATPEIR; AQPSDNAPAKGNKSPSPPDGsPAATPEIR	0.4	-0.15	0.42	-0.24	-0.13	0.17	0.01	-0.04	-0.07	-0.04	-0.56	-0.05
MSH6	P52701-2	1_Phospho	S137: Phospho	VHVQFFDDsPTR	0.41	-1.75	-1.05	0.44	0.05	0.04	1.29	0.97	1.22	1.31	1.01	-0.28
PGM1	P36871-2	1_Phospho	S135: Phospho	AIGGIILTAsHN; AIGGIILTAsHNPGGPN; AIGGIILTAsHNPGGPNGDFGIKFNISNGGPAPEAITDK; AIGGIILtAsHNPGGPNGDFGIK; AIGGIILTAsHNPGGPNGDFGIK	0.26	0.75	1.06	0.56	0.38	-0.76	0.25	0.98	1.02	0.66	0.29	-0.13
BCLAF1	Q9NYF8	1_Phospho	S285: Phospho	SGSGSVGNGSSRYsPSQNSPIHHIPSR; YsPSQNsPIHHIPSRR; YsPSQNSPIHHIPSRR	-0.54	-0.46	-0.47	0.07	-0.2	0.47	-0.22	-0.04	-0.24	-0.05	-0.12	0.27
FOXC2	Q99958	1_Phospho	S219: Phospho	SEAAsPALPVITK	0.37	-0.16	0.3	0.46	-0.44	0.07	0.28	-0.06	0.11	0.57	-0.18	0.38
PCYT1A	P49585	1_Phospho	S343: Phospho	TsPPCSPANLSR; WPFSGKTsPPCSPANLSR	0.1	0.38	0.05	-0.31	0.03	-0.64	0.05	0.41	-0.26	-0.54	-0.07	-0.06
SH3BP1	Q9Y3L3	1_Phospho	S550: Phospho	VTRsPPETAAPVEDMAR; sPPETAAPVEDMAR	0.09	0.06	-0.14	0.2	-0.35	0.07	0.21	-0.1	0.47	-0.08	0.12	-0.24
SPAG9	O60271-4	1_Phospho	S185: Phospho	TKLHQLSGsDQLESTAHSR	-0.04	0.09	-0.19	0.2	-0.08	0.45	0	0.24	0.31	0.45	0.05	-0.19
CHSY1	Q86X52	3_Phospho	S501: Phospho; S503: Phospho; S505: Phospho	RINQEsGsLsFLSNSLK	0.56	0.45	1.37	1.02	0.31	0.38	1.3	1.03	1.36	1.12	0.51	0.39
RALGPS2	Q86X27	1_Phospho	T326: Phospho	SVAAEGALLPQtPPSPR	0.44	0.32	0.29	-0.08	-0.74	-0.14	-0.89	-0.67	-1.89	-2.04	-0.2	0.38
DDX3X	O00571-2	1_Phospho	S578: Phospho	SSRFsGGFGAR; SRFsGGFGAR; FsGGFGAR	0.5	0.06	0.12	-0.06	0.41	0.43	0.53	0.27	0.12	-0.04	0.53	0.72
ZNF777	Q9ULD5-2	1_Phospho	S7: Phospho	SsPLSFPSVPQEETLR	0.46	-1.05	0.02	-0.68	-0.46	-0.75	0.05	0.37	-0.07	0.33	0.06	0.43
CNN3	Q15417	1_Phospho	S323: Phospho	DYQYsDQGIDY	-0.7	0.19	0.13	-0.03	-0.41	-0.03	0.42	0.3	0.57	0.47	0.24	-0.25
DTX3L	Q8TDB6	1_Phospho	S202: Phospho	QQFsPSMTER	-0.62	-0.46	0.02	-0.15	-0.07	-0.2	-0.49	-0.18	-0.03	-0.37	-0.23	0.16
PLEKHA5	Q9HAU0	1_Phospho	S596: Phospho	sVPAGLTLQSVSPQSLQGK	1.15	0.5	0.08	0.14	-0.19	-0.5	0.93	0.45	0.5	0	0.42	-0.01
AHNAK	Q09666	1_Phospho	S5720: Phospho	FNFsKPK	0.66	-0.46	0.01	0.57	-0.1	-0.74	-0.17	-0.62	-0.31	-0.14	-0.89	-0.02
DBN1	Q16643-2	1_Phospho	S339: Phospho	sPSDSSTASTPVAEQIER; MAPTPIPTRsPSDSSTASTPVAEQIER	0.28	0.73	0.27	0.06	0.79	0.35	-0.06	-0.26	-0.35	-0.14	0.22	-0.09
ERCC5	P28715	1_Phospho	S384: Phospho	NAPAAVDEGSIsPR	0.2	0.13	-0.08	-0.16	0.31	0.05	0.14	-0.06	-0.34	-0.28	0.31	0.05
INCENP	Q9NQS7	1_Phospho	T294: Phospho	VLAPILPDNFSTPtGSR	-0.03	0.19	0.44	-1.12	0.39	1.81	1.03	1.25	1.06	0.76	0.34	0.06
ASMTL	O95671-2	1_Phospho	S21: Phospho	VVLASAsPR	0.08	0.26	0.31	0.23	-0.03	0.22	0.01	0.25	0.23	0.15	0	0.06
AHNAK	Q09666	2_Phospho	S216: Phospho	TVIRLPSGSGAAsPTGSAVDIR; LPSGSGAAsPTGSAVDIR	0.45	0.49	0.65	0.16	0.58	-0.16	0.38	0.42	0.79	-0.05	0.67	-0.06
VGLL4	Q14135	1_Phospho	S149: Phospho	NSLDASRPAGLsPTLTPGER	0.34	0.13	0.53	0.58	0.51	-1.25	0.49	0.21	-0.29	0.1	0.16	-0.49
DDI2	Q5TDH0	1_Phospho	S194: Phospho	LFsADPFDLEAQAK	0.02	-0.12	-0.23	-1.05	0.94	0.9	0.41	0.82	0.65	-0.17	1.28	0.49
ANP32A	P39687	1_Phospho	S17: Phospho	NRTPsDVKELVLDNSR; NRTPsDVK	0.39	-0.04	0.45	0.09	0.19	-0.21	0.48	-0.33	0.28	-0.03	0.55	-0.49
HIRIP3	Q9BW71	1_Phospho	S530: Phospho	TLDsDEERPR; TLDsDEERPRPAPPDWSHMR	0	-0.24	-0.37	0.47	-0.96	-0.16	-0.34	-0.2	-0.13	-0.13	-0.39	-0.37
SRRM2	Q9UQ35-2	2_Phospho	T1531: Phospho; S1537: Phospho	TVARtPLGQRsR	0.21	0.16	0.36	0.37	0.17	0.32	0.63	0.68	0.94	0.85	0.54	-0.05
RAI1	Q7Z5J4-2	1_Phospho	T1089: Phospho	TKETDSPStPGKDQR; ETDSPStPGKDQR	0.54	0.45	0.11	0.25	0.39	-0.15	0.05	-0.19	-0.03	0.11	-0.19	-0.05
POLR2A	P24928	1_Phospho	S1864: Phospho	YSPTsPK	0.29	0.09	0.34	-0.02	0.14	0.06	0.34	0.17	0.17	0.2	0.21	0.33
C9orf172	C9J069	1_Phospho	S109: Phospho	APPGLTPAPAsPPVLPR	-0.38	-0.14	0.44	-0.51	0.22	-0.04	0.1	-0.16	0.04	0.22	0.13	-0.36
ENO1	P06733	1_Phospho	S419: Phospho	IEEELGsK	-0.01	0.08	0.25	0.43	0.09	-0.08	0.22	0.18	0.3	0.48	0.29	0.1
BICD2	Q8TD16	1_Phospho	S582: Phospho	sPILLPK; RsPILLPK	-0.12	-0.05	0.01	-0.06	0.12	-0.23	0.17	0.27	-0.09	0.1	0.29	0.69
ZCCHC8	Q6NZY4-2	1_Phospho	S262: Phospho	GTPPLTPSDsPQTR	0.07	0	0.25	-0.04	0.07	0.56	0.16	-0.11	-0.02	0.34	-0.34	0.18
TP53BP1	Q12888-2	1_Phospho	T1324: Phospho	TSSGtSLSAMHSSGSSGK	-0.07	0.19	-0.21	0.31	-0.53	0.06	0.44	0.97	0.45	0.87	0.14	-0.78
CARHSP1	Q9Y2V2	1_Phospho	S147: Phospho	HETWSGHVISs	0.27	0.21	-0.11	0.09	0.27	0.08	0.17	-0.17	-0.02	-0.08	0.09	-0.19
GAB1	Q13480-2	1_Phospho	S547: Phospho	TDsQTIGDFATR	-0.53	0.36	-1.21	0.01	0.45	0.01	-1.01	0.43	0.35	0.36	0.25	-0.88
RB1	P06400	1_Phospho	S249: Phospho	TAVIPINGsPR	-0.01	0.47	0.54	0.43	0.36	0.05	-0.02	0.34	0.3	0.33	0.38	0.31
RPS6KA4	O75676-2	1_Phospho	S347: Phospho	LEPVYSPPGsPPPGDPR	0.51	0.29	0.69	0.12	0.53	0.15	0.56	0.38	0.13	-0.24	0.39	0.27
HCFC1	P51610	1_Phospho	S598: Phospho	VASsPVMVSNPATR	0.18	0.12	0.03	0.11	0.2	-0.24	0.34	-0.14	0.34	0.61	-0.06	0.02
LARP4B	Q92615	1_Phospho	S451: Phospho	LINGVRsPQTR	0.14	0.24	0.09	-0.02	0.48	0.53	-0.57	-0.64	-0.22	-0.58	0.32	0.79
DBN1	Q16643-2	1_Phospho	T348: Phospho	SPSDSSTAStPVAEQIER	-0.4	0.16	0.41	-0.04	0.1	0.24	-0.17	-0.29	-0.1	-0.06	-0.11	0.86
LIG1	P18858	1_Phospho	S76: Phospho	VLGSEGEEEDEALsPAK	0.16	0.26	0.29	0.27	-0.33	-1.47	-0.13	0.47	-0.21	0.33	-0.42	0.09
FOXK1	P85037	2_Phospho	S416: Phospho	sAPASPTHPGLMSPR	-0.05	-0.07	-0.03	-0.11	0.05	-0.12	-0.24	-0.04	0.01	0.07	-0.12	-0.01
SRRM1	Q8IYB3-2	2_Phospho	S547: Phospho; S549: Phospho	RRsPsPPPTR; RsPsPPPTRR; sPsPPPTR	-0.12	0.05	0.12	-0.3	-0.21	1.42	-0.18	-0.91	0.06	-0.04	0.22	-0.53
TNKS1BP1	Q9C0C2-2	1_Phospho	S142: Phospho	WLDDLLAsPPPSGGGAR	-0.14	-0.52	-0.51	-0.25	-0.36	0.2	-0.2	-0.37	-0.08	-0.41	-0.35	-0.26
PGK1	P00558	1_Phospho	S203: Phospho	ALEsPERPFLAILGGAK	0.48	0.9	0.94	0.73	0.53	-0.78	0.56	0.82	0.92	0.84	0.59	-0.11
RPS3	P23396	1_Phospho	S104: Phospho	GLCAIAQAEsLR	-0.54	0.78	1.25	0.83	0.67	0.55	-0.24	0.19	-0.15	0.34	-0.08	0.08
SRRM2	Q9UQ35-3	2_Phospho		THTTALAGRSPSPASGRR; RGEGDAPFSEPGTTSTQRPSSPETATK	-0.05	-0.82	-0.76	0.55	0.34	0.3	0.14	0.05	0.37	0.69	0.64	0.16
ZC3H13	Q5T200	1_Phospho	S242: Phospho	TSAVSsPLLDQQR; KTSAVSsPLLDQQR	-0.03	0.09	-0.06	-0.01	-0.25	-0.12	0.11	0.08	-0.05	0.1	-0.09	0.09
ZC3HAV1	Q7Z2W4-3	2_Phospho	S275: Phospho	SCTPsPDQISHR	-0.23	-0.19	-0.56	-0.82	0.27	1.08	-0.03	-0.33	0.24	-0.1	0.18	-0.32
DNMBP	Q6XZF7	1_Phospho	S1379: Phospho	QNsGSTLTFNPSSMAVSFTSGSCQK	0.73	0.89	0.88	0.91	0.15	-0.12	-0.08	0.52	0.1	-0.09	-0.36	-0.36
NUP98	P52948	1_Phospho	S839: Phospho	CLIKsPDRLADINYEGR; CLIKsPDR	0.18	-0.11	0.19	-0.21	0.11	0.22	-0.04	-0.86	-0.92	-1.2	-0.17	0.18
SF3B1	O75533	1_Phospho	T227: Phospho	LSSWDQAETPGHtPSLR; KLSSWDQAETPGHtPSLR	-0.72	0.04	-0.12	-0.51	-0.45	-0.26	0	0.08	-0.06	-0.04	-0.07	0.03
UBAP2L	Q14157-1	1_Phospho	S445: Phospho	SPAVATsTAAPPPPSSPLPSK; SPAVATstAAPPPPSSPLPSK	-0.09	0.18	0.22	-0.75	0.21	-0.06	-0.67	-0.96	-0.71	-1.47	-0.42	0.33
SRSF3	P84103	2_Phospho	S138: Phospho; S140: Phospho	ERsLsR	0.34	0.23	0.25	0.33	0.26	0.83	0.48	-1.77	-0.32	-0.86	0.25	-0.05
LARP4B	Q92615	1_Phospho	S731: Phospho	EQsTPPKSPQ	0.16	0.37	0.35	-0.36	-0.32	0.33	-0.04	0.61	0.38	0.03	-0.19	-0.03
CTNNA1	P35221-2	1_Phospho	S641: Phospho	TPEELDDsDFETEDFDVR	-0.51	0.07	0.18	-0.12	-0.08	0.09	-0.06	0.24	0.01	-0.15	0.08	-0.01
NUF2	Q9BZD4	1_Phospho	S247: Phospho	IVDsPEKLK; IVDsPEK	-0.12	-0.37	-0.34	-0.07	-0.06	0.01	-0.02	-0.15	0.02	0.1	0.25	-0.22
MYO9B	Q13459	1_Phospho		ATGAALTPTEER; AAGMSSPGAQSHPEELPR; RYSDPPTYCLPPASGQTNG; RPSSFVTVR; TSFSTSDVSK; LPELDPRGSDEENLDSETSASTESLLEER	-0.69	-0.53	-0.15	-0.38	0.34	0.09	-0.8	-0.22	-0.79	-0.08	-0.07	0.72
TBC1D10B	Q4KMP7	1_Phospho	S658: Phospho	QQPPLGPSSsLLSLPGLK	0	1.2	0.03	0.72	-0.24	-0.3	0.51	0.57	-0.15	0.12	-0.44	0.3
SLC9A1	P19634	1_Phospho	S703: Phospho	IGsDPLAYEPK; IGsDPLAYEPKEDLPVITIDPASPQSPESVDLVNEELKGK	0.41	0.51	-0.09	0.44	0.64	0.38	0.53	0.53	0.03	0.23	0.54	-0.05
WDR33	Q9C0J8	1_Phospho	S1210: Phospho	DTPRPDHPPHDGHsPASR	0.34	0.11	-0.12	0.13	-0.26	-0.08	0.25	-0.16	-0.29	-0.15	-0.03	0
HNRNPA1	P09651	1_Phospho	S6: Phospho	SEsPKEPEQLR; SKSEsPKEPEQLR; SEsPKEPEQLRK	0.13	0.21	0.13	0.29	0	0.08	-0.14	-0.35	-0.89	-0.45	-0.29	0.25
PLEC	Q15149-6	2_Phospho	S4253: Phospho	SSsVGSSSSYPISPAVSR	0.13	0.89	-0.04	0.3	0.37	-0.44	0.58	0.45	0.5	0.27	0.33	-0.88
KRT8	P05787	1_Phospho	S43: Phospho	VGsSNFR	0.44	0.01	-0.4	-0.13	0.31	0.5	-0.14	-0.18	0.23	-0.32	0.05	-0.56
YTHDC1	Q96MU7-2	1_Phospho	S146: Phospho	AKsPTPDGSER	-0.2	0.02	0.23	0	-0.14	0.26	0.19	0.68	0.01	0.37	0.5	0.84
HIVEP3	Q5T1R4	2_Phospho	S2073: Phospho; S2079: Phospho	RWsPGQAEsPPR	0.11	-1.06	0.61	-0.03	0.36	-0.51	0.1	-0.92	-0.63	-1.13	-0.25	-0.44
MPRIP	Q6WCQ1-2	1_Phospho	S993: Phospho	SKsNPDFLKK; sNPDFLKK; SKsNPDFLK	-0.81	0.29	0.18	0.23	-0.02	-0.38	-0.66	0.54	-0.01	0.29	0.03	-0.07
PAK2	Q13177	1_Phospho	S152: Phospho	DGFPsGTPALNAK	0.2	0.12	-0.06	0.21	0.31	0.06	0.38	0.64	0.3	0.5	0.93	0.45
MICALL1	Q8N3F8	1_Phospho	S295: Phospho	LQELAsPPAGRPTPAPR	-0.47	-0.23	0.03	-0.11	0.04	0.13	-0.57	-0.55	-0.29	-0.53	-0.27	0.38
AZI1	Q9UPN4	1_Phospho	T479: Phospho	tHHRGR	-0.03	0.22	-0.23	-0.15	0.29	-0.29	0.23	0.17	-0.28	-0.48	0.24	0.17
TNKS1BP1	Q9C0C2	1_Phospho		SSGSEGSSPNWLQALK; HNGSLSPGLEAR; SPSQDFSFIEDTEILDSAMYR	0.14	-0.91	-0.14	-2.25	-0.31	-0.97	0.23	-0.09	-1.37	-0.68	0.49	0.2
AKIRIN2	Q53H80	1_Phospho	S21: Phospho	TLDFDPLLSPAsPKR; TLDFDPLLSPAsPK	0.08	-0.18	-0.29	0.29	0.35	0.57	-0.13	-0.21	-0.39	-0.35	0.11	-0.17
MPRIP	Q6WCQ1-2	2_Phospho	S289: Phospho	AEEQQLPPPLsPPSPSTPNHR; AEEQQLPPPLsPPSPSTPNHRR	0.47	0.41	0.27	0.64	0.13	0.31	0.23	0.58	0.55	0.51	0.34	-0.05
CDC42EP1	Q00587-2	2_Phospho	S192: Phospho; S195: Phospho	RSDsLLsFR; SDsLLsFR	-0.24	-0.3	-1	0.15	-0.67	0.53	0.09	-1.01	-0.64	0.36	-0.54	-0.6
VCAN	P13611-5	1_Phospho	S2116: Phospho	QEIESETTsEEQIQEEK; QEVNPVRQEIESETTsEEQIQEEK	-0.23	1.12	0.58	0.88	0.06	0.3	-0.03	-0.18	0.29	0.1	-0.46	-0.27
CD97	P48960	1_Phospho	T825: Phospho	YSEFTSTTSGTGHNQtR	0.31	0.56	0.61	0.65	0.69	-0.04	-0.15	-0.12	-0.11	0.22	0.36	0.06
MSL3	Q8N5Y2-2	1_Phospho	S341: Phospho	SSsPIPLTPSK	-0.33	0.11	-0.51	0.04	0.1	-0.2	0.22	0.33	0.51	0.14	0	-0.56
SYNJ1	O43426	1_Phospho	S1392: Phospho	SsPNPFITGLTR	0.09	0.18	-0.05	0.1	0.58	0.46	0.37	0.54	-0.13	0.31	0.5	0.77
HIRIP3	Q9BW71	2_Phospho	T84: Phospho; S87: Phospho	RPPtPCsDPER	-0.32	-0.09	0.04	-0.3	-0.14	-0.17	-0.44	-0.02	-0.2	-0.05	-0.15	-0.12
LARP1B	Q659C4	1_Phospho	S343: Phospho	IGSPLsPK	-0.74	-0.67	-0.15	-0.61	-0.96	-0.26	-1.02	-0.63	-0.43	-1.05	-0.95	-0.23
EPHA2	P29317	2_Phospho	S892: Phospho; S897: Phospho	TLADFDPRVsIRLPsTSGSEGVPFR; VsIRLPsTSGSEGVPFR	1.17	0.42	1.07	-0.21	1.2	0.5	0.7	0.3	0.15	0.02	1.02	0.22
PRKDC	P78527	1_Phospho	S893: Phospho	RLsFAVPFR	0.41	1.06	1.63	1.01	-0.02	-1.26	0.47	1.01	0.62	1.01	-0.41	0.04
HSPA4	P34932	1_Phospho	S647: Phospho	FVSEDDRNsFTLK	0.19	0.01	0.03	0.35	0.25	0.16	0.05	0.19	-0.13	0.14	0.16	0.48
MED14	O60244	1_Phospho	S1112: Phospho	AGNWPGsPQVSGPSPAAR	0.26	0.58	-0.05	0	0.31	0.39	-0.51	-0.6	-1.29	-0.63	-0.69	0.01
TUSC2	O75896	1_Phospho	S50: Phospho	RGsMFYDEDGDLAHEFYEETIVTK	0.15	0.07	-0.67	-0.07	-0.1	0.54	-0.12	-0.47	-0.23	-0.31	-0.1	0.01
SRRM2	Q9UQ35-2	1_Phospho	S895: Phospho	HSCSGSsPPRVK; HSCSGSsPPR	0.18	-0.05	-0.25	-2.73	-0.01	0.18	0.16	0.22	0.55	0.38	0.23	-0.37
ACTG1	P63261	1_Phospho	T203: Phospho	GYSFTTtAEREIVR	0.38	0.37	0.11	0.05	0.14	0.3	0.09	-0.09	-0.18	-0.33	-0.16	-0.05
PUM2	Q8TB72-3	1_Phospho	S587: Phospho	REsLSTSSDLYKR	0.42	0.12	0.06	0.4	-0.23	-0.19	1	0.47	0.27	0.55	0.41	-0.1
PKN2	Q16513-2	1_Phospho	S360: Phospho	ATSVALPGWsPSETR	-0.12	0.01	0.13	-0.25	-0.03	0.43	-0.08	0.23	0.11	-0.36	-0.16	0.68
MEX3D	Q86XN8	2_Phospho	T510: Phospho; S514: Phospho	SSGAGtPRHsPTLPEPGGLR	-0.15	-0.64	-0.37	0.12	-0.08	0.2	0.27	-0.14	0.39	0.08	0.36	-0.65
UNK	Q9C0B0	1_Phospho	S385: Phospho	NSSLGSPSNLCGsPPGSIR	0.17	0.22	0.88	0.8	0.17	0.01	0.29	0.35	0.16	0.24	0.48	0.16
RPL4	P36578	1_Phospho	S295: Phospho	ILKsPEIQR	-0.09	-0.05	0.31	0.2	-0.07	0.64	-0.14	-0.09	0.25	0.2	-0.09	0.75
DHX57	Q6P158	1_Phospho	S132: Phospho	GLsGEEEDDEPDCCNDER	-0.24	-0.18	0.18	-0.26	-0.18	0.08	0.07	0.6	0.23	0.26	-0.03	0.14
MCMBP	Q9BTE3-3	1_Phospho	S125: Phospho	VHsPPASLVPR	-0.2	-1.29	-1.04	-0.05	-0.05	0.1	1.07	1.41	1.31	1.35	1.06	-0.67
POP1	Q99575	1_Phospho	S367: Phospho	SAVCIADPLPTPsQEK	-0.12	0.4	0.18	0.02	0.11	0.4	-0.29	-0.73	-0.51	-0.18	-0.15	0.61
UHRF1	Q96T88-2	1_Phospho	S300: Phospho	IERPGEGsPMVDNPMR; IERPGEGsPMVDNPMRR	-0.19	-0.18	-0.02	0.16	-0.32	-0.25	0.14	0.15	0.24	0.27	0.05	0.1
TMEM163	Q8TC26	1_Phospho	S12: Phospho	RSsQGPTVPPPPR; SsQGPTVPPPPR	0.66	0.48	0.47	0.65	-0.22	-1.02	0.49	0.11	0.39	0.45	-0.47	-0.63
BCLAF1	Q9NYF8	1_Phospho	S264: Phospho	NtPSQHSHsIQHsPER; NTPSQHSHsIQHSPER; TPSQHSHsIQHsPER	-0.6	0.69	-0.67	-0.75	0.26	-0.2	-0.24	-0.2	-0.11	-0.09	0.32	-0.04
TJAP1	Q5JTD0-4	1_Phospho	T347: Phospho	AFVDRtPPPAAVAQR	0.2	0.06	0.07	-0.43	0.13	0.06	0.03	-0.21	-0.06	-0.41	0.02	0.06
SGTA	O43765	1_Phospho	S77: Phospho	EMPQDLRsPAR	-0.07	0.17	0.22	-0.1	0.06	0.2	-0.31	-0.27	-0.25	-0.23	-0.18	0.52
USP36	Q9P275-2	1_Phospho	S742: Phospho	AVsPAPQSSSR	-0.16	-0.28	0.02	-0.32	-0.13	0.48	0.01	-0.57	0.25	0.13	0.39	0.2
TCOF1	Q13428	1_Phospho	S233: Phospho	ASSVSTKEsPARK; ASSVSTKEsPAR	-0.77	-0.19	-0.02	-0.31	-0.59	0.15	-0.57	0	-0.12	-0.08	-0.34	0.32
FAM122B	Q7Z309-3	1_Phospho	S156: Phospho	MFVSSSGLPPsPVPSPR	0.31	0	0.22	0.22	-0.13	0	0.28	0.2	0.35	1.97	0.02	-1.02
RIPK2	O43353	1_Phospho	S363: Phospho	sLPAPQDNDFLSR	0.16	0.08	-0.15	-0.18	0.23	-0.01	-0.74	-0.39	0.89	-0.88	-0.38	0.54
PLEKHG2	Q9H7P9-3	2_Phospho	T1228: Phospho; S1232: Phospho	LESSDLtPPHsPPPSSR	-0.3	-0.38	-0.34	-0.32	-1.11	0.01	0.07	-0.67	-0.54	-0.26	-0.29	-0.15
TBC1D5	Q92609	1_Phospho	S541: Phospho	NISSSPsVESLPGGR	0.17	-0.09	-0.31	-0.62	0.03	0.95	0.03	-0.16	-0.18	-0.1	0.1	0.45
PABPC4	Q13310	1_Phospho	S644: Phospho	VGAVAAATs	0.29	-0.52	-0.4	-0.1	0.39	0.81	0.05	0.53	-0.06	0.41	0.3	0.07
RPP40	O75818	No Phospho		ISWSFK	0.29	-0.05	-0.86	0.27	0.03	0	0.31	0.17	-0.25	0.35	0	-0.63
PTPN21	Q16825	1_Phospho	S673: Phospho	AVSVGsQPSVFTER	0.19	0.16	0.35	0.06	-0.19	0.15	0.08	0.18	0.08	-0.22	-0.05	0.08
UBE2O	Q9C0C9	1_Phospho	S401: Phospho	IMSCsPDTQCSR	0.13	0.03	0.42	0.2	0.11	0.33	-0.05	0.11	-0.07	-0.14	-0.49	0.17
PLEKHG3	A1L390-2	1_Phospho	S21: Phospho	RPSGRsPTSTEK	0.07	-0.36	0.29	-0.37	0.03	0.26	-0.04	-0.8	0.15	-0.5	0.24	-0.57
CASC4	Q6P4E1-4	2_Phospho	S328: Phospho; S332: Phospho	LIPGsNLDsEPR	0.8	1.09	1.58	0.63	0.16	-1.24	1.13	1.15	1.15	0.8	0.22	-0.61
RB1	P06400	2_Phospho	S249: Phospho; T252: Phospho	TAVIPINGsPRtPR	0.15	-0.07	0.49	0.17	0.24	0.25	-0.16	-0.09	0.28	-0.01	-0.02	0.49
AAK1	Q2M2I8	1_Phospho	S7: Phospho	KFFDsR; FFDsR	0.98	-0.84	-2.14	0.62	-0.15	0.08	0.66	0.2	-0.28	0.87	0.03	-0.31
PPP6R2	O75170-6	1_Phospho	S742: Phospho	AFSPAsPCAWNVCVTR	0.25	-0.01	-0.08	-0.74	0.34	0.38	0.29	0.86	0.85	0.43	0.62	1.03
UBA2	Q9UBT2	No Phospho		EELDDVIALD	-0.14	0.15	-0.16	-0.14	-0.18	0.08	0.79	0.88	1.03	0.86	0.53	0.05
MYO18A	Q92614-2	1_Phospho	S1689: Phospho	SLAPDRsDDEHDPLDNTSRPR	0.25	0.36	-0.27	0.07	-1.52	-0.02	0.46	0.4	0.5	0.17	-0.3	0.46
PHLDB1	Q86UU1	1_Phospho	S443: Phospho	TLQPPEsPR	-0.19	0.05	0.39	-0.11	0.55	0.1	-0.23	0.02	0.23	-0.04	0.39	0.26
TNKS1BP1	Q9C0C2	1_Phospho	S429: Phospho	RFsEGVLQSPSQDQEK	0.13	0.7	0.04	0.17	-0.18	-0.4	-0.05	0.11	0.28	-0.29	-0.94	-0.44
TP53BP1	Q12888-2	1_Phospho		MVIQGPSSPQGEAMVTDVLEDQK; SNVSSPATPTASSSSSTTPTR; DILLCDPIPLDTEVTALSEDEYFSAGVVK; EQLSAQELMESGLQIQKSPEPEVLSTQEDLFDQSNK; TSEIEPKNSPEDLGLSLTGDSCK; TSGTEPADFALPSSRGGPGKLSPR; KECSEAMEVETSVISIDSPQK; TSSGTSLSAMHSSGSSGK; TVSSDGCSTPSREEGGCSLASTPATTLHLLQLSGQR; QSQQPMKPISPVKDPVSPASQK; EMPKKECSEAMEVETSVISIDSPQK; KVTEETEEPIVECQECETEVSPSQTGGSSGDLGDISSFSSK; MVIQGPSSPQGEAMVTDVLEDQKEGR; SNVSSPATPTASSSSSTTPTRK	-0.04	-0.32	-0.14	0.19	-1.71	0.05	-0.67	-0.19	-0.11	-0.19	-0.82	-0.13
USP8	P40818	1_Phospho		SYSSPDITQAIQEEEKR; SYSSPDITQAIQEEEK	0.2	0.59	0.81	0.46	0.17	-0.25	0.01	0.43	0.29	0.51	0.24	-0.05
DPF2	Q92785	1_Phospho	S142: Phospho	VDDDsLGEFPVTNSR	-0.58	-0.26	-0.87	0.35	-0.6	0.24	-0.4	-0.55	-0.09	0.21	-0.87	-0.75
CHD8	Q9HCK8-2	1_Phospho		TASPLPLRPDAPVEKSPEETATQVPSLESLTLK; VSPSDTTPLVSR	-0.07	0.22	0.03	0.22	-0.09	0.09	-0.39	0.18	-0.54	0	-0.73	0.59
STIM1	Q13586	1_Phospho	S575: Phospho	LPDsPALAKK; LIEGVHPGSLVEKLPDsPALAK; LPDsPALAK	0.39	0.5	0.83	-0.09	1.11	0.17	0.53	0.49	0.44	0.36	0.78	0.37
ZNF358	Q9NW07	1_Phospho	S487: Phospho	STPsPTPVESSDPK	-0.05	0.16	-0.06	-0.41	-0.85	-0.53	-0.41	-0.13	-0.46	-0.25	-0.74	0.07
UGP2	Q16851	1_Phospho	S13: Phospho	AMsQDGASQFQEVIR	-0.1	1.05	-0.15	1.17	1.07	0.5	0.49	0.28	0.59	-0.01	-0.64	0.85
AKT1S1	Q96B36	1_Phospho	S183: Phospho	sLPVsVPVW; sLPVSVPVWGFK	0.14	0.33	0.18	-0.55	0.09	0.21	-0.07	0.57	0.19	-0.45	0.2	0.61
TSC2	P49815-2	1_Phospho	S1756: Phospho	LISsVEDFTEFV	0.86	0.57	1.03	0.72	0.43	-1.91	1.26	1.49	1.4	1.42	0.83	-0.14
BIRC6	Q9NR09	1_Phospho	S480: Phospho	LEGDSDDLLEDsDSEEHSR	0.01	-0.78	-0.08	0.19	-0.63	0.35	-0.05	0.06	-0.06	-0.25	-0.13	0.14
AHNAK	Q09666	1_Phospho	S115: Phospho	EVFSSCSSEVVLsGDDEEYQR	0.16	-0.14	0.36	-0.4	0.19	0.68	0	-0.18	0.2	0.11	-0.15	0.03
NEK9	Q8TD19	1_Phospho	S869: Phospho	VASEAPLEHKPQVEASsPR; VASEAPLEHKPQVEASsPRLNPAVTCAGK	0.71	-0.5	0.69	0.46	0.3	0.1	0.55	0.29	0.61	0.25	0.16	0.12
SF3B1	O75533	2_Phospho	T223: Phospho; T227: Phospho	KLSSWDQAEtPGHtPSLR	0.56	0.4	0.58	0.72	0.04	-0.45	0.13	-0.43	0.15	-0.23	0.06	-0.3
GRB10	Q13322-4	1_Phospho		TSSLPAIPNPFPELCGPGSPPVLTPGSLPPSQAAAK; SVSENSLVAMDFSGQTGR	-0.91	0.52	0.99	0.32	0.47	0.53	-0.51	0.02	0.02	0.2	-0.19	0.35
MLL2	O14686-3	1_Phospho	S2277: Phospho	ASEPLLsPPPFGESR	0.11	0.16	-0.09	-0.52	0.24	0.55	0.21	0.05	-0.07	0.21	0.19	0.04
PHLDB1	Q86UU1	1_Phospho	S563: Phospho	KLsSGDLR	-0.13	-0.17	0.4	-0.23	-0.1	-0.83	-0.02	0.39	0.52	0.29	0.29	0.15
ASPSCR1	Q9BZE9-3	1_Phospho	S450: Phospho	AAGSPsPLPAPDPAPK	-0.12	0.67	-0.04	-2.04	0.1	0.16	-0.38	-0.11	-0.11	-0.25	-0.14	0.04
ARFGAP1	Q8N6T3-3	1_Phospho	T189: Phospho	YVGFGNtPPPQK; YVGFGNtPPPQKK	-1.01	-0.46	0.03	-0.63	-0.3	0.14	-0.65	-0.13	-0.11	-0.41	0.16	0.27
EBAG9	O00559	1_Phospho	S36: Phospho	KLsGDQITLPTTVDYSSVPK	0.96	1.25	1.45	1.9	0.78	-0.65	0.44	-0.17	0.06	0.35	0.49	-0.05
AHNAK	Q09666	1_Phospho	S3412: Phospho	FKMPFLSISsPK; MPFLSISsPK	0.31	0.03	0.63	-0.09	0.62	0.37	0.08	-0.01	0.34	-0.54	0.19	1.04
TSC22D4	Q9Y3Q8	1_Phospho	T229: Phospho	VEAEAGGSGARtPPLSR	0.45	0.65	0.57	0.21	0.54	0.3	0.11	0.18	0.08	-0.22	0.25	0.48
ARAF	P10398	2_Phospho	S269: Phospho; S274: Phospho	KsPHSKsPAEQR; sPHSKsPAEQR	-0.3	-0.43	0.1	-0.36	-0.09	-0.38	0.12	0.02	0.37	0.2	0.11	-0.11
SPAG9	O60271-4	1_Phospho	S318: Phospho	NVSTGsAENEEK	-0.06	0.12	0.07	0	0.19	0	-0.27	-0.15	-0.55	-0.54	-0.52	-0.36
HTATSF1	O43719	1_Phospho	S409: Phospho	HFSEHPSTsK	0.68	0.33	-0.24	-0.02	0.63	1.37	0.85	0.67	0.45	-0.35	-0.05	0.13
TIMELESS	Q9UNS1	1_Phospho	S1087: Phospho	IPAKLsPTQLRR; IPAKLsPTQLR	0.12	-0.17	0.1	0.05	0.04	0.13	0	0.05	0.06	-0.15	-0.2	0.22
PLEC	Q15149-6	1_Phospho	S4252: Phospho	SsSVGSSSSYPISPAVSR; AGTLSITEFADMLSGNAGGFRSRSssVGSSSSYPISPAVSR	0.35	0.7	-0.96	0.56	0.05	-0.61	0.28	0.48	0.34	0.2	0.07	-0.57
TRIM28	Q13263-2	1_Phospho	S391: Phospho	SRsGEGEVSGLMR; sGEGEVSGLMR	0.32	0.16	-0.27	0.09	-0.19	0.06	0.43	0.12	-0.15	0.23	-0.54	-0.11
BCLAF1	Q9NYF8	1_Phospho	S290: Phospho	SGSGSVGNGSSRYSPsQNsPIHHIPSR; SGSGSVGNGSSRYSPSQNsPIHHIPSR; YSPSQNsPIHHIPSRR; YSPSQNsPIHHIPSR; ySPSQNsPIHHIPSRR; SGSGSVGNGSSRYSPSQNsPIHHIPSRR	0.3	0.07	-0.08	0.47	0.3	0.41	-0.25	-0.42	-0.66	-0.17	0.02	0.2
INTS1	Q8N201	1_Phospho	T83: Phospho	LSStPPLSALGR	-0.44	0.14	0.21	0.15	-0.14	-0.23	-0.33	0.5	-0.04	0.19	-0.22	0.03
ARHGEF40	Q8TER5-2	1_Phospho	S247: Phospho	IQQHVGEEAsPR	-0.68	-0.12	-0.24	-0.42	0.34	-0.06	-0.89	-0.49	-1.25	-0.74	0.03	0.14
EPB49	Q08495-2	1_Phospho	S92: Phospho	STsPPPSPEVWADSR	-0.99	-0.01	-0.02	-0.29	-1.36	0.18	-0.93	-0.1	0.24	-0.08	-2.18	0.26
[truncated: 4,113 more rows]
