# Supplementary material for: STRIPAK directs PP2A activity toward MAP4K4 to promote oncogenic transformation of human cells
Source: eLife. 2020 Jan 8;9:e53003. doi: 10.7554/eLife.53003 (PMC6984821; doi:10.7554/eLife.53003)
Supplement: Supplementary file 3. [file elife-53003-supp3.xlsx]

## Sheet: S3
Supplementary file 3. Results of the SILAC experiment representing MAP4K4 interacting proteins.
Protein Description	Protein Name	UniProt Accession	Gene Symbol	AS-20190516-IP1 Ratio (ST/GFP)	AS-20190516-IP1 Peptide Sequences	AS-20190516-IP2 Ratio (ST/GFP)	AS-20190516-IP2 Peptide Sequences
Isoform 8 of Tropomyosin alpha-1 chain	TPM1	P09493-8	TPM1	1.01482	SIDDLEEK; AELSEGQVR; IMDQTLK; QLEEQLR	1.07421	IMDQTLK; SIDDLEEK; AELSEGQVR; AEDSLLAAEEAAAK; QLEEQLR
Microtubule-associated protein RP/EB family member 1	MARE1	Q15691	MAPRE1	NaN	ILQAGFK; IVDILYATDEGFVIPDEGGPQEEQEEY	0.764507	LTVEDLEK; ILQAGFK
Isoform 2 of Heterogeneous nuclear ribonucleoprotein K	HNRPK	P61978-2	HNRNPK	nd		NaN	QYADVEGF
Isoform 3 of Heterogeneous nuclear ribonucleoprotein K	HNRPK	P61978-3	HNRNPK	0.928382	IIPTLEEYQHYK	1.13871	IIPTLEEYQHYK
Zyxin	ZYX	Q15942	ZYX	nd		0.522661	QNVAVNELCGR
60S ribosomal protein L36	RL36	Q9Y3U8	RPL36	0.984903	YPMAVGLNK; EVCGFAPYER; EELSNVLAAMR	1.13667	YPMAVGLNK; EVCGFAPYER; EELSNVLAAMR
KN motif and ankyrin repeat domain-containing protein 2	KANK2	Q63ZY3	KANK2	NaN	LDLDFLK	NaN	TQDDIETVLQLFR; LDLDFLK
Toll-interacting protein	TOLIP	Q9H0E2	TOLLIP	0.672534	GPVYIGELPQDFLR	1.41054	GPVYIGELPQDFLR; LNITVVQAK
Importin subunit alpha-3	IMA3	O00629	KPNA4	0.808529	IEQLQNHENEDIYK	nd
Nicotinate-nucleotide pyrophosphorylase [carboxylating]	NADC	Q15274	QPRT	3.10831	DNHVVAAGGVEK	1.9229	VALNTLAR; DNHVVAAGGVEK
T-complex protein 1 subunit zeta	TCPZ	P40227	CCT6A	1.19576	VLAQNSGFDLQETLVK; VATAQDDITGDGTTSNVLIIGELLK; EGIVALR; ALQFLEEVK; ETLIDVAR; GIDPFSLDALSK	1.47862	VLAQNSGFDLQETLVK; VATAQDDITGDGTTSNVLIIGELLK; ALQFLEEVK; EGIVALR
Calcyclin-binding protein	CYBP	Q9HB71	CACYBP	nd		NaN	SFDLLVK; WDYLTQVEK; ISNYGWDQSDK
Isoform Non-brain of Clathrin light chain A	CLCA	P09496-2	CLTA	1.7822	AAEEAFVNDIDESSPGTEWER	1.36369	AAEEAFVNDIDESSPGTEWER
Alpha-taxilin	TXLNA	P40222	TXLNA	NaN	DLQQQLVDAK	nd
Activated RNA polymerase II transcriptional coactivator p15	TCP4	P53999	SUB1	0.418222	EQISDIDDAVR	NaN	DDNMFQIGK; EQISDIDDAVR
Cytochrome c	CYC	P99999	CYCS	nd		1.20069	ADLIAYLK; TGQAPGYSYTAANK
Probable RNA-binding protein 19	RBM19	Q9Y4C8	RBM19	nd		14.3787	NIPFQAHSREIR
Titin	TITIN	Q8WZ42	TTN	nd		0.0839121	ISTSPIR
Phosphoglycerate kinase 1	PGK1	P00558	PGK1	nd		2.0052	ACANPAAGSVILLENLR; GCITIIGGGDTATCCAK; AGGFLMK; AAVPSIK; ITLPVDFVTADKFDENAK; ITLPVDFVTADK
G-protein coupled receptor family C group 5 member C	GPC5C	Q9NQ84	GPRC5C	NaN	VPSEGAYDIILPR	nd
40S ribosomal protein S6	RS6	P62753	RPS6	0.946354	LIEVDDER; DIPGLTDTTVPR	1.07157	LNISFPATGCQK; LIEVDDER; DIPGLTDTTVPR
60S ribosomal protein L23a	RL23A	P62750	RPL23A	1.02231	VNTLIRPDGEK; KLYDIDVAK; LAPDYDALDVANK; LDHYAIIK; LYDIDVAK; VNTLIRPDGEKK	1.1551	VNTLIRPDGEK; KLYDIDVAK; LAPDYDALDVANK; LDHYAIIK; LYDIDVAK; VNTLIRPDGEKK
Nucleoside diphosphate kinase B	NDKB	P22392	NME2	nd		0.997701	EISLWFKPEELVDYK
Heterogeneous nuclear ribonucleoprotein K	HNRPK	P61978	HNRNPK	0.96262	NTDEMVELR; IILDLISESPIK; IDEPLEGSEDR; DYDDMSPR; DLAGSIIGK; GSDFDCELR; TDYNASVSVPDSSGPER; GGDLMAYDR; LFQECCPHSTDR; GSYGDLGGPIITTQVTIPK; NLPLPPPPPPR; RPAEDMEEEQAFK; VVLIGGKPDR	1.11087	NTDEMVELR; IILDLISESPIK; IDEPLEGSEDR; DLAGSIIGK; GSDFDCELR; TDYNASVSVPDSSGPER; GGDLMAYDR; ILSISADIETIGEILK; LFQECCPHSTDR; RPAEDMEEEQAFK; GSYGDLGGPIITTQVTIPK; NLPLPPPPPPR; IITITGTQDQIQNAQYLLQNSVK; VVLIGGKPDR
Centromere protein J	CENPJ	Q9HC77	CENPJ	0.0413956	EDSPQVCDDK	NaN	EDSPQVCDDK
Histone-lysine N-methyltransferase 2A	KMT2A	Q03164	KMT2A	1.93857	AAVALGR	1.17604	AAVALGR
Eukaryotic translation initiation factor 5A-1	IF5A1	P63241	EIF5A	1.18921	NDFQLIGIQDGYLSLLQDSGEVR	1.06167	NDFQLIGIQDGYLSLLQDSGEVR; EDLRLPEGDLGK
Monofunctional C1-tetrahydrofolate synthase, mitochondrial	C1TM	Q6UB35	MTHFD1L	0.925595	DFILPISDVR	NaN	AVIELLEK
Thioredoxin domain-containing protein 5	TXND5	Q8NBS9	TXNDC5	0.907918	EYVESQLQR; IAEVDCTAER; ALAPTWEQLALGLEHSETVK	0.987801	VDCTAHSDVCSAQGVR; IAEVDCTAER; ALAPTWEQLALGLEHSETVK
Src substrate cortactin	SRC8	Q14247	CTTN	1.07804	VDQSAVGFEYQGK; FGVQMDR; QDSAAVGFDYK; ASAGHAVSIAQDDAGADDWETDPDFVNDVSEK; TVPVEAVTSK; LPSSPVYEDAASFK; FGVQSER; DYSSGFGGK; YGLFPANYVELR; ENVFQEHQTLK; CALGWDHQEK; ANFENLAK; SAVGFEYQGK; FGVEQDR; NASTFEDVTQVSSAYQK	1.37922	VDQSAVGFEYQGK; FGVQMDR; QDSAAVGFDYK; SAVGFDYQGK; TVQGSGHQEHINIHK; ASAGHAVSIAQDDAGADDWETDPDFVNDVSEK; TVPVEAVTSK; LPSSPVYEDAASFK; FGVQSER; DYSSGFGGK; YGLFPANYVELR; ENVFQEHQTLK; CALGWDHQEK; ANFENLAK; SAVGFEYQGK; FGVEQDR; FGVQTDR; NASTFEDVTQVSSAYQK
Coronin-1B	COR1B	Q9BR76	CORO1B	1.04485	AIFLADGK; DADPILISLR	1.12958	AIFLADGK; DADPILISLR
Ribosome-binding protein 1	RRBP1	Q9P2E9	RRBP1	0.827369	DAQDVQASQAEADQQQTR; ELCHTQSSHASLR; LLATEQEDAAVAK; VGAAEEELQK; LIEILSEK; CEELSGLHGQLQEAR	1.02062	ELCHTQSSHASLR; LTSDLGR; SVEEEEQVWR; VGAAEEELQK; LLATEQEDAAVAK; LIEILSEK
Pleckstrin homology domain-containing family G member 5	PKHG5	O94827	PLEKHG5	NaN	IVCRELR	nd
Microtubule-actin cross-linking factor 1, isoforms 1/2/3/5	MACF1	Q9UPN3	MACF1	1.32121	YISDALR; EANSVLQWLESK; LVSDANEQYK	1.94661	YISDALR; LANSEPVGTQTAK; AGNELLESSAGDDASSLR
Supervillin	SVIL	O95425	SVIL	NaN	LTEHNETILFK; SNEEEETSDSSLEK	0.606894	GAQVQVLQGK; ENFSNVSLR
Cytochrome b-c1 complex subunit 6, mitochondrial	QCR6	P07919	UQCRH	nd		0.460559	LELCDER; SHTEEDCTEELFDFLHAR; ERLELCDER
Thioredoxin-dependent peroxide reductase, mitochondrial	PRDX3	P30048	PRDX3	NaN	DLSLDDFK	1.13157	DLSLDDFK; GLFIIDPNGVIK; DYGVLLEGSGLALR
26S proteasome non-ATPase regulatory subunit 2	PSMD2	Q13200	PSMD2	1.06318	VGQAVDVVGQAGKPK; EPLLTLVK; LVGSQEELASWGHEYVR	1.45692	LVGSQEELASWGHEYVR; EDVLTLLLPVMGDSK; VGQAVDVVGQAGKPK; CALGVFR; YGEPTLR; EWQELDDAEK; AELATEEFLPVTPILEGFVILR; EPLLTLVK; FGGSGSQVDSAR
Peripheral-type benzodiazepine receptor-associated protein 1	RIMB1	O95153	TSPOAP1	NaN	QQLEVEHEQAR	nd
Isoform Alpha of Striatin-3	STRN3	Q13033-2	STRN3	3.05145	SSGDGTEWAEPITFPSGGGK	4.55054	SSGDGTEWAEPITFPSGGGK
Heterogeneous nuclear ribonucleoproteins C1/C2	HNRPC	P07910	HNRNPC	NaN	GFAFVQYVNER	1.21086	GFAFVQYVNER
LIM domain and actin-binding protein 1	LIMA1	Q9UHB6	LIMA1	0.584687	LSETSIK; SEISENTDASGK; IAWPPPTELGSSGSALEEGIK; ELSVEEQIK; ISANENSLAVR; ENVPPGPEVCITHQEGEK; SQDVELWEGEVVK; ETPHSPGVEDAPIAK; VGVLAASMEAK; QSSSTNYTNELK	0.712105	ASSLSESSPPK; SEISENTDASGK; ELSVEEQIK; IAWPPPTELGSSGSALEEGIK; ISANENSLAVR; SLNWSSFVDNTFAEEFTTQNQK; ENVPPGPEVCITHQEGEK; SQDVELWEGEVVK; VGVLAASMEAK; YNVPLNR; QSSSTNYTNELK
Peroxiredoxin-5, mitochondrial	PRDX5	P30044	PRDX5	0.887689	ETDLLLDDSLVSIFGNR; VNLAELFK	1.31535	ETDLLLDDSLVSIFGNR; VNLAELFK
Inhibitor of nuclear factor kappa-B kinase-interacting protein	IKIP	Q70UQ0	IKBIP	nd		1.27731	LETNEFQQLQSK; ISGLVTDVISLTDSVQELENK
Heat shock protein 75 kDa, mitochondrial	TRAP1	Q12931	TRAP1	2.58148	GVVDSEDIPLNLSR	0.753081	GVVDSEDIPLNLSR
Prelamin-A/C	LMNA	P02545	LMNA	0.829695	TLEGELHDLR; LEAALGEAK; LADALQELR; SGAQASSTPLSPTR; NSNLVGAAHEELQQSR; VAVEEVDEEGK; DLEALLNSK; LVEIDNGK; AQHEDQVEQYK; SNEDQSMGNWQIK; QNGDDPLLTYR; SLETENAGLR; ITESEEVVSR; AAYEAELGDAR; EDLQELNDR; TVLCGTCGQPADK; IDSLSAQLSQLQK; EGDLIAAQAR	1.10581	TLEGELHDLR; NSNLVGAAHEELQQSR; LEAALGEAK; AAYEAELGDAR; SGAQASSTPLSPTR; SNEDQSMGNWQIK; VAVEEVDEEGKFVR; LADALQELR; VAVEEVDEEGK; QLQDEMLR; EDLQELNDR; SLETENAGLR; ITESEEVVSR; TALINSTGEEVAMR; IDSLSAQLSQLQK; DLEALLNSK; LQLELSK; LAVYIDR; EGDLIAAQAR
Ras-related protein Ral-A	RALA	P11233	RALA	NaN	VKEDENVPFLLVGNK	NaN	VKEDENVPFLLVGNK
60S ribosomal protein L13a	RL13A	P40429	RPL13A	0.900228	LAAIVAK; CEGINISGNFYR; LAHEVGWK	1.05475	LAAIVAK; CEGINISGNFYR; LAHEVGWK
Nucleosome assembly protein 1-like 4	NP1L4	Q99733	NAP1L4	0.591568	SEPDKADPFSFEGPEIVDCDGCTIDWK; LDNVPHTPSSYIETLPK; VLAALQER	1.45528	LDNVPHTPSSYIETLPK; YAALYQPLFDK; QVPNESFFNFFNPLK
Cytochrome c1, heme protein, mitochondrial	CY1	P08574	CYC1	nd		0.471861	GLLSSLDHTSIR
Ras-responsive element-binding protein 1	RREB1	Q92766	RREB1	NaN	RSSEKSDDDK	nd
OTU domain-containing protein 4	OTUD4	Q01804	OTUD4	NaN	VEDFDHTSR	nd
Cell cycle and apoptosis regulator protein 2	CCAR2	Q8N163	CCAR2	1.15289	VLLLSSPGLEELYR	1.75622	VLLLSSPGLEELYR; VVTQNICQYR
14-3-3 protein epsilon	1433E	P62258	YWHAE	1.12551	EDLVYQAK; HLIPAANTGESK; QMVETELK; LICCDILDVLDK; AAFDDAIAELDTLSEESYK; IISSIEQK; EAAENSLVAYK; EALQDVEDENQ; YLAEFATGNDR	1.23544	YDEMVESMK; QMVETELK; HLIPAANTGESK; LICCDILDVLDK; DNLTLWTSDMQGDGEEQNK; AAFDDAIAELDTLSEESYK; IISSIEQK; EAAENSLVAYK; EALQDVEDENQ; YLAEFATGNDR
Translationally-controlled tumor protein	TCTP	P13693	TPT1	nd		1.93856	EIADGLCLEVEGK
Malate dehydrogenase, mitochondrial	MDHM	P40926	MDH2	0.790841	IQEAGTEVVK	1.22608	LTLYDIAHTPGVAADLSHIETK; IFGVTTLDIVR; GCDVVVIPAGVPR; SQETECTYFSTPLLLGK
Protein disulfide-isomerase A4	PDIA4	P13667	PDIA4	0.593194	DGDDVIIIGVFK; FDVSGYPTIK	1.28751	DGDDVIIIGVFK; FDVSGYPTIK; VSQGQLVVMQPEK; VDATAETDLAK
Tax1-binding protein 3	TX1B3	O14907	TAX1BP3	nd		0.911025	VSEGGPAEIAGLQIGDK
Guanine nucleotide-binding protein G(I)/G(S)/G(T) subunit beta-2	GBB2	P62879	GNB2	1.04535	ACGDSTLTQITAGLDPVGR; TFVSGACDASIK	1.45564	ACGDSTLTQITAGLDPVGR; LLLAGYDDFNCNIWDAMK; TFVSGACDASIK
Neutral amino acid transporter B(0)	AAAT	Q15758	SLC1A5	1.06137	EVLDSFLDLAR; SYSTTYEER	NaN	EVLDSFLDLAR
60S acidic ribosomal protein P1	RLA1	P05386	RPLP1	1.02251	AAGVNVEPFWPGLFAK; ALANVNIGSLICNVGAGGPAPAAGAAPAGGPAPSTAAAPAEEK	1.08497	AAGVNVEPFWPGLFAK; ALANVNIGSLICNVGAGGPAPAAGAAPAGGPAPSTAAAPAEEK
60S acidic ribosomal protein P2	RLA2	P05387	RPLP2	1.02453	ILDSVGIEADDDRLNK; LASVPAGGAVAVSAAPGSAAPAAGSAPAAAEEK; KILDSVGIEADDDRLNK; NIEDVIAQGIGK; ILDSVGIEADDDR; VISELNGK	1.10728	YVASYLLAALGGNSSPSAK; LASVPAGGAVAVSAAPGSAAPAAGSAPAAAEEK; KILDSVGIEADDDRLNK; NIEDVIAQGIGK; KILDSVGIEADDDR; ILDSVGIEADDDR; ILDSVGIEADDDRLNK; VISELNGK
Guanine nucleotide-binding protein G(I)/G(S)/G(T) subunit beta-1	GBB1	P62873	GNB1	0.964913	ACADATLSQITNNIDPVGR; ELAGHTGYLSCCR; LFVSGACDASAK	1.19982	ACADATLSQITNNIDPVGR; ELAGHTGYLSCCR; LFVSGACDASAK
60S acidic ribosomal protein P0	RLA0	P05388	RPLP0	0.98485	AVVLMGK; AFLADPSAFVAAAPVAAATTAAPAAAAAPAK; VLALSVETDYTFPLAEK	1.1112	AVVLMGK; AFLADPSAFVAAAPVAAATTAAPAAAAAPAK; GNVGFVFTK; VLALSVETDYTFPLAEK
Ubiquitin-40S ribosomal protein S27a	RS27A	P62979	RPS27A	1.01304	CCLTYCFNKPEDK; ECPSDECGAGVFMASHFDR	1.07675	CCLTYCFNKPEDK; ECPSDECGAGVFMASHFDR
Alpha-2-HS-glycoprotein	FETUA	P02765	AHSG	0.0801077	CDSSPDSAEDVRK; CNLLAEK	NaN	CNLLAEK
DNA-directed RNA polymerases I, II, and III subunit RPABC5	RPAB5	P62875	POLR2L	NaN	LLNYAPLEK	nd
Extended synaptotagmin-1	ESYT1	Q9BSJ8	ESYT1	nd		1.82165	LLVPLVPDLQDVAQLR
UV excision repair protein RAD23 homolog B	RD23B	P54727	RAD23B	nd		NaN	EQVIAALR
Ribonuclease inhibitor	RINI	P13489	RNH1	nd		NaN	ELCQGLGQPGSVLR
Syntenin-1	SDCB1	O00560	SDCBP	nd		NaN	SIDNGIFVQLVQANSPASLVGLR
Annexin A2	ANXA2	P07355	ANXA2	0.820147	GVDEVTIVNILTNR; AEDGSVIDYELIDQDAR; RAEDGSVIDYELIDQDAR; DLYDAGVK; QDIAFAYQR	1.12074	AEDGSVIDYELIDQDAR; QDIAFAYQR; RAEDGSVIDYELIDQDAR; GDLENAFLNLVQCIQNKPLYFADR; GVDEVTIVNILTNR; DLYDAGVK
NADH dehydrogenase [ubiquinone] 1 alpha subcomplex subunit 9, mitochondrial	NDUA9	Q16795	NDUFA9	0.40775	QPVYVVDVSK; NFDFEDVFVK	0.487247	IPQAIAQLSK; VFEISPFEPWITR; LPHLPGLEDLGIQATPLELK; QPVYVVDVSK; NFDFEDVFVK
DNA repair protein XRCC1	XRCC1	P18887	XRCC1	nd		1.65073	DSPFGLSFVR
Isoform 6 of Mitogen-activated protein kinase kinase kinase kinase 4	M4K4	O95819-6	MAP4K4	1.7897	LTANETQSASSTLQK	1.77061	LTANETQSASSTLQK
Ras GTPase-activating protein-binding protein 2	G3BP2	Q9UN86	G3BP2	0.185885	NLEELEEK; VEAKPEVQSQPPR; LPNFGFVVFDDSEPVQR	1.2894	VEAKPEVQSQPPR; LPNFGFVVFDDSEPVQR
40S ribosomal protein S11	RS11	P62280	RPS11	0.968156	QPTIFQNK; EAIEGTYIDKK; EAIEGTYIDK; NIGLGFK; ILSGVVTK; DYLHYIR; DVQIGDIVTVGECRPLSK; CPFTGNVSIR; VLLGETGK	1.00128	QPTIFQNK; EAIEGTYIDKK; NIGLGFK; ILSGVVTK; DVQIGDIVTVGECRPLSK; CPFTGNVSIR; VLLGETGK
Myristoylated alanine-rich C-kinase substrate	MARCS	P29966	MARCKS	1.44656	GEPAAAAAPEAGASPVEK; AEDGATPSPSNETPK; EAGEGGEAEAPAAEGGK; GEAAAERPGEAAVASSPSK	2.00258	GEPAAAAAPEAGASPVEK; VNGDASPAAAESGAK; AEDGATPSPSNETPK; EAGEGGEAEAPAAEGGK; GEAAAERPGEAAVASSPSK
26S proteasome non-ATPase regulatory subunit 6	PSMD6	Q15008	PSMD6	nd		NaN	GAEILEVLHSLPAVR
Nuclease-sensitive element-binding protein 1	YBOX1	P67809	YBX1	1.01159	EDGNEEDKENQGDETQGQQPPQRR; GAEAANVTGPGGVPVQGSK; NEGSESAPEGQAQQR; NYQQNYQNSESGEKNEGSESAPEGQAQQR; EDGNEEDKENQGDETQGQQPPQR; AADPPAENSSAPEAEQGGAE; NYQQNYQNSESGEK	1.00142	EDGNEEDKENQGDETQGQQPPQRR; GAEAANVTGPGGVPVQGSK; NEGSESAPEGQAQQR; NYQQNYQNSESGEKNEGSESAPEGQAQQR; EDGNEEDKENQGDETQGQQPPQR; AADPPAENSSAPEAEQGGAE; NYQQNYQNSESGEK
60S ribosomal protein L11	RL11	P62913	RPL11	0.962223	IAVHCTVR; AEEILEK; VLEQLTGQTPVFSK; YDGIILPGK	1.13013	IAVHCTVR; AEEILEK; VLEQLTGQTPVFSK; YDGIILPGK
Proteasome subunit alpha type-1	PSA1	P25786	PSMA1	1.23376	LVSLIGSK	1.44302	LVSLIGSK; AQPAQPADEPAEK
Proteasome subunit alpha type-2	PSA2	P25787	PSMA2	2.26608	YNEDLELEDAIHTAILTLK	1.9055	YNEDLELEDAIHTAILTLK
Poly(rC)-binding protein 2	PCBP2	Q15366	PCBP2	0.997432	IANPVEGSTDR	1.10874	IITLAGPTNAIFK; IANPVEGSTDR
Proteasome subunit alpha type-4	PSA4	P25789	PSMA4	1.2782	LLDEVFFSEK	1.63524	LLDEVFFSEK
MutS protein homolog 5	MSH5	O43196	MSH5	nd		NaN	ALGGLLK
Poly(rC)-binding protein 1	PCBP1	Q15365	PCBP1	1.23401	LVVPATQCGSLIGK; IANPVEGSSGR; AITIAGVPQSVTECVK; QGANINEIR	1.01811	LVVPATQCGSLIGK; IANPVEGSSGR; AITIAGVPQSVTECVK; QGANINEIR; IITLTGPTNAIFK
Vesicle-associated membrane protein-associated protein B/C	VAPB	O95292	VAPB	0.654378	VEQVLSLEPQHELK	nd
Phosphorylated adapter RNA export protein	PHAX	Q9H814	PHAX	NaN	NTPSISEEQIK	nd
Huntingtin-interacting protein 1	HIP1	O00291	HIP1	1.26369	YSELVQNHADLLR; DSLVSGAAHR; SLSEIER; VLELENELQK; TQEQLEVLESLK; AIGEELLPR; QQAADDCEFLR; SVSVTAAGQCR; AELDELRR; EEELSALR; AINTQEVAVK	1.6867	DSLVSGAAHR; VLELENELQK; TQEQLEVLESLK; DSPNLAQLQQASR; QQAADDCEFLR; SVSVTAAGQCR; AINTQEVAVK
Mitochondrial import inner membrane translocase subunit Tim8 A	TIM8A	O60220	TIMM8A	0.896901	AEACFVNCVER	NaN	AEACFVNCVER
Transketolase	TKT	P29401	TKT	NaN	LDNLVAILDINR	1.88253	VLDPFTIKPLDR
Pre-mRNA-processing factor 19	PRP19	Q9UMS4	PRPF19	1.02277	QELSHALYQHDAACR; TVPEELVKPEELSK; SSEQILATLK	NaN	QELSHALYQHDAACR; SSEQILATLK
Transgelin	TAGL	Q01995	TAGLN	nd		0.63632	TDMFQTVDLFEGK; EFTESQLQEGK
Protein PRRC2C	PRC2C	Q9Y520	PRRC2C	0.174383	ISAVESQPSR	nd
Insulin-like growth factor 2 mRNA-binding protein 3	IF2B3	O00425	IGF2BP3	0.62887	DQTPDENDQVVVK; ITISPLQELTLYNPER; TGYAFVDCPDESWALK; TVNELQNLSSAEVVVPR; AIEALSGK; IAPAEAPDAK	0.724308	ITISPLQELTLYNPER; DQTPDENDQVVVK; LYIGNLSENAAPSDLESIFK; IAPAEAPDAK
Heat shock protein HSP 90-alpha	HS90A	P07900	HSP90AA1	1.51281	LGIHEDSQNR; DQVANSAFVER; NPDDITNEEYGEFYK	1.32656	VFIMDNCEELIPEYLNFIR; DQVANSAFVER; HLEINPDHSIIETLR; NPDDITNEEYGEFYK; RAPFDLFENR; LGIHEDSQNR
60S ribosomal protein L3	RL3	P39023	RPL3	1.02744	FQTMEEK; SLLVQTK; TVFAEHISDECK; IGQGYLIK; AFMGPLK; LEQQVPVNQVFGQDEMIDVIGVTK; NNASTDYDLSDK; HGSLGFLPR	1.08186	FQTMEEK; SLLVQTK; TVFAEHISDECK; IGQGYLIK; HGSLGFLPR; NNASTDYDLSDK; LEQQVPVNQVFGQDEMIDVIGVTK
Merlin	MERL	P35240	NF2	1.24016	EFTIKPLDK; DLFDLVCR	NaN	VLEAEVLALK; DLFDLVCR
Radixin	RADI	P35241	RDX	nd		0.684604	NQEQLAAELAEFTAK
Unconventional myosin-VI	MYO6	Q9UM54	MYO6	0.81531	LVGILDILDEENR	nd
Splicing factor 3B subunit 1	SF3B1	O75533	SF3B1	0.658882	VVNGAAASQPPSK; DTPGHGSGWAETPR; VQENCIDLVGR; YELDYIL; TEILPPFFK; LLVDVDESTLSPEEQK; SLVEIIEHGLVDEQQK	1.05807	TEILPPFFK; VQENCIDLVGR; VVNGAAASQPPSK; DTPGHGSGWAETPR; SLVEIIEHGLVDEQQK
Actin-related protein 3	ARP3	P61158	ACTR3	0.768675	HGIVEDWDLMER; EFNKYDTDGSK; AEPEDHYFLLTEPPLNTPENR; KDYEEIGPSICR; DYEEIGPSICR; YSYVCPDLVK; GVDDLDFFIGDEAIEKPTYATK; FMEQVIFK; LPACVVDCGTGYTK; EFSIDVGYER; QYTGINAISK	1.01887	HGIVEDWDLMER; TLTGTVIDSGDGVTHVIPVAEGYVIGSCIK; FMEQVIFK; DYEEIGPSICR; LGYAGNTEPQFIIPSCIAIK; EFNKYDTDGSK; AEPEDHYFLLTEPPLNTPENR; GVDDLDFFIGDEAIEKPTYATK; LPACVVDCGTGYTK; EFSIDVGYER; QYTGINAISK
Barrier-to-autointegration factor	BAF	O75531	BANF1	nd		NaN	DFVAEPMGEKPVGSLAGIGEVLGK
Eukaryotic translation initiation factor 3 subunit G	EIF3G	O75821	EIF3G	0.99201	VTNLSEDTR	1.01053	VTNLSEDTR
Platelet-activating factor acetylhydrolase IB subunit alpha	LIS1	P43034	PAFAH1B1	0.747007	GHTDSVQDISFDHSGK; LWDFQGFECIR; FILSCADDK	nd
Cold shock domain-containing protein E1	CSDE1	O75534	CSDE1	1.13683	EAFGFIER; DGFGFIK	nd
Heterogeneous nuclear ribonucleoprotein A1	ROA1	P09651	HNRNPA1	0.867216	SESPKEPEQLR; NQGGYGGSSSSSSYGSGR	0.950975	SESPKEPEQLR; NQGGYGGSSSSSSYGSGR; SESPKEPEQLRK
Protein/nucleic acid deglycase DJ-1	PARK7	Q99497	PARK7	nd		NaN	APLVLKD
Oxidoreductase-like domain-containing protein 1	OXLD1	Q5BKU9	OXLD1	1.93857	AVAAAVR	1.17604	AVAAAVR
Structural maintenance of chromosomes protein 3	SMC3	Q9UQE7	SMC3	NaN	KGDVEGSQSQDEGEGSGESER	1.03444	KGDVEGSQSQDEGEGSGESER
Cytochrome c oxidase subunit 7A2, mitochondrial	CX7A2	P14406	COX7A2	0.398537	LFQEDDEIPLYLK; GGVADALLYR	0.468949	LFQEDDEIPLYLK; GGVADALLYR
Acetyl-coenzyme A thioesterase	ACO12	Q8WYK0	ACOT12	0.0615755	VGQVITIK	nd
Aspartyl/asparaginyl beta-hydroxylase	ASPH	Q12797	ASPH	0.350916	NDLGVGYLLIGDNDNAK	NaN	VLIFDDSFEHEVWQDASSFR
Histone H4	H4	P62805	HIST1H4A	0.531971	VFLENVIR; ISGLIYEETR; DAVTYTEHAK	0.795002	VFLENVIR; ISGLIYEETR; DAVTYTEHAK
Twinfilin-1	TWF1	Q12792	TWF1	0.780472	INEVQTDVGVDTK; EAFQALEK; YLLSQSSPAPLTAAEEELR; NEIIILANTTNTELK; EDVSLHGYK; QPCYILFR; LLEIVER; DYDSFVLPLLEDK; HQTLQGVAFPISR	0.799688	QLQMDVIR; INEVQTDVGVDTK; EAFQALEK; YLLSQSSPAPLTAAEEELR; NEIIILANTTNTELK; KIEIDNGDELTADFLYEEVHPK; QPCYILFR; EFGGGHIKDEVFGTVK; LLEIVER; DYDSFVLPLLEDK; HQTLQGVAFPISR
60S ribosomal protein L6	RL6	Q02878	RPL6	1.03107	VLATVTKPVGGDK; YEITEQR; HQEGEIFDTEK; FVIATSTK; IDISNVK; YYPTEDVPR; AVDSQILPK	1.02152	VLATVTKPVGGDK; YEITEQR; HQEGEIFDTEK; FVIATSTK; IDISNVK; YYPTEDVPR; AVDSQILPK
Lactadherin	MFGM	Q08431	MFGE8	NaN	LASHEYLK	NaN	LASHEYLK
Tropomyosin alpha-4 chain	TPM4	P67936	TPM4	0.717387	KIQALQQQADEAEDR; IQALQQQADEAEDR; MEIQEMQLK; EKAEGDVAALNR; TIDDLEEK; EENVGLHQTLDQTLNELNCI; YSEKEDKYEEEIK; AEGDVAALNR	0.688427	KIQALQQQADEAEDRAQGLQR; KIQALQQQADEAEDR; IQALQQQADEAEDR; MEIQEMQLK; IQALQQQADEAEDRAQGLQR; EKAEGDVAALNR; TIDDLEEK; EENVGLHQTLDQTLNELNCI; YSEKEDKYEEEIK; EKAEGDVAALNRR; AEGDVAALNR
Helicase MOV-10	MOV10	Q9HCE1	MOV10	NaN	AQLETALK; FVDGLTFK; TVTLVEAIK; ETGDPGGQLVLAGDPR	NaN	FVDGLTFK; TVTLVEAIK
60S ribosomal protein L10	RL10	P27635	RPL10	0.777596	EHVIEALR; FNADEFEDMVAEK	1.38307	EHVIEALR
26S proteasome regulatory subunit 4	PRS4	P62191	PSMC1	0.944	VAEEHAPSIVFIDEIDAIGTK	0.36872	DDLSGADIK; IETLDPALIRPGR; VAEEHAPSIVFIDEIDAIGTK
26S proteasome regulatory subunit 8	PRS8	P62195	PSMC5	1.49038	LEGGSGGDSEVQR; VSGSELVQK	1.38988	LEGGSGGDSEVQR
Actin-related protein 2/3 complex subunit 5	ARPC5	O15511	ARPC5	0.650785	ALAAGGVGSIVR	NaN	AGSIVLK
Glucose-6-phosphate 1-dehydrogenase	G6PD	P11413	G6PD	NaN	VQPNEAVYTK	2.87184	LEDFFAR; LQFHDVAGDIFHQQCK; VQPNEAVYTK; GGYFDEFGIIR; VGFQYEGTYK
V-type proton ATPase subunit E 1	VATE1	P36543	ATP6V1E1	NaN	DDLITDLLNEAK	1.44689	ARDDLITDLLNEAK; DDLITDLLNEAK
Serine/threonine-protein kinase 24	STK24	Q9Y6E0	STK24	NaN	NLENGALQPSDLDR	NaN	ADIWSLGITAIELAR
40S ribosomal protein S21	RS21	P63220	RPS21	0.718404	MGESDDSILR	1.12245	MGESDDSILR
Heat shock cognate 71 kDa protein	HSP7C	P11142	HSPA8	1.25472	GTLDPVEK; LSKEDIER; SFYPEEVSSMVLTK; SQIHDIVLVGGSTR; MKEIAEAYLGK; QTQTFTTYSDNQPGVLIQVYEGER; NQVAMNPTNTVFDAK; SINPDEAVAYGAAVQAAILSGDK; RFDDAVVQSDMK; CNEIINWLDK; EIAEAYLGK; FDDAVVQSDMK; DAGTIAGLNVLR; NSLESYAFNMK; TVTNAVVTVPAYFNDSQR; NQTAEKEEFEHQQK; VCNPIITK; MVNHFIAEFK	1.15003	GTLDPVEK; RFDDAVVQSDMK; LSKEDIER; SFYPEEVSSMVLTK; FELTGIPPAPR; MKEIAEAYLGK; QTQTFTTYSDNQPGVLIQVYEGER; NQVAMNPTNTVFDAK; SINPDEAVAYGAAVQAAILSGDK; SQIHDIVLVGGSTR; CNEIINWLDK; MVNHFIAEFK; FDDAVVQSDMK; DAGTIAGLNVLR; VCNPIITK; TVTNAVVTVPAYFNDSQR; NQTAEKEEFEHQQK; EIAEAYLGK
Protein quaking	QKI	Q96PU8	QKI	NaN	LLDEEISR	nd
Tetraspanin-14	TSN14	Q8NG11	TSPAN14	NaN	TLISDIEAVK	NaN	SYRDDIDLQNLIDSLQK
Inosine-5'-monophosphate dehydrogenase 2	IMDH2	P12268	IMPDH2	1.31423	NLIDAGVDALR; YFSEADK; VAQGVSGAVQDK	1.08859	NLIDAGVDALR; VAQGVSGAVQDK
T-complex protein 1 subunit epsilon	TCPE	P48643	CCT5	1.23056	WVGGPEIELIAIATGGR; DVDFELIK; LDVTSVEDYK; IADGYEQAAR; FSELTAEK	1.70117	LDVTSVEDYK; IADGYEQAAR; DTEPLIQTAK; WVGGPEIELIAIATGGR; VAIEHLDK; LMGLEALK; DVDFELIK
Nuclear cap-binding protein subunit 1	NCBP1	Q09161	NCBP1	NaN	ATNDEIFSILK	1.55753	ATNDEIFSILK
Nucleolar RNA helicase 2	DDX21	Q9NR30	DDX21	0.458019	SDAGLESDTAMK; EEYQLVQVEQK; EQLGEEIDSK; LGVCFDVPTASVTEIQEK; NEEPSEEEIDAPKPK	0.892813	LLDSVPPTAISHFK; EEYQLVQVEQK; TFSFAIPLIEK
Heterogeneous nuclear ribonucleoprotein A0	ROA0	Q13151	HNRNPA0	1.10814	GDVAEGDLIEHFSQFGTVEK; GFGFVYFQNHDAADK; EDIYSGGGGGGSR	1.1675	GDVAEGDLIEHFSQFGTVEK; EDIYSGGGGGGSR; LFIGGLNVQTSESGLR
Lysosomal protective protein	PPGB	P10619	CTSA	0.643611	DLECVTNLQEVAR	0.88717	YGDSGEQIAGFVK; DLECVTNLQEVAR
NADH dehydrogenase [ubiquinone] iron-sulfur protein 6, mitochondrial	NDUS6	O75380	NDUFS6	0.697987	VYINLDK; VIACDGGGGALGHPK	0.552895	VYINLDK; VIACDGGGGALGHPK
Peroxisomal membrane protein PEX14	PEX14	O75381	PEX14	1.28326	EPLIATAVK; GGDGQINEQVEK; IQELAHELAAAK	1.82726	GGDGQINEQVEK
Septin-9	SEPT9	Q9UHD8	SEPT9	NaN	SITHDIEEK	1.4045	APVDFGYVGIDSILEQMR; ADTLTLEER; STLINTLFK; SITHDIEEK
Ran GTPase-activating protein 1	RAGP1	P46060	RANGAP1	nd		NaN	LAETLAK
Four and a half LIM domains protein 2	FHL2	Q14192	FHL2	1.08593	DDILCPDCGK; DNQNFCVPCYEK; CAGCTNPISGLGGTK; ECFVCTACR; EDQLLCTDCYSNEYSSK; QWHNDCFNCK; YISFEER; NSLVDKPFAAK	1.18819	NSLVDKPFAAK; CAGCTNPISGLGGTK; EDQLLCTDCYSNEYSSK; TIMPGTR; YISFEER; DNQNFCVPCYEK; CSLSLVGR
DNA replication licensing factor MCM2	MCM2	P49736	MCM2	1.35002	VAVGELTDEDVK	nd
Plastin-3	PLST	P13797	PLS3	0.961343	STSIQSFK; YTLNVLEDLGDGQK; ANDDIIVNWVNR; EGICALGGTSELSSEGTQHSYSEEEK; INNFSADIK; VYALPEDLVEVKPK	1.1814	TISSSLAVVDLIDAIQPGCINYDLVK; STSIQSFK; YTLNVLEDLGDGQK; ANDDIIVNWVNR; VDLNSNGFICDYELHELFK; IKVPVDWSK; AESMLQQADK; VYALPEDLVEVKPK
Dihydropyrimidinase-related protein 3	DPYL3	Q14195	DPYSL3	1.22706	ISVGSDSDLVIWDPDAVK	1.67879	SAADLISQAR; ISVGSDSDLVIWDPDAVK
Nascent polypeptide-associated complex subunit alpha	NACA	Q13765	NACA	1.0495	SPASDTYIVFGEAK; IEDLSQQAQLAAAEK	1.06042	SPASDTYIVFGEAK; IEDLSQQAQLAAAEK
Nicotinamide N-methyltransferase	NNMT	P40261	NNMT	nd		1.96145	EPEAFDWSPVVTYVCDLEGNR; FSSLPLGR
Peroxisome assembly factor 2	PEX6	Q13608	PEX6	nd		NaN	LAVTELR
BTB/POZ domain-containing protein KCTD17	KCD17	Q8N5Z5	KCTD17	0.799391	ELHSTPNGLSSESSR	0.957368	VLQCQEEELTQMVSTMSDGWR; ELHSTPNGLSSESSR
Cytoplasmic dynein 1 heavy chain 1	DYHC1	Q14204	DYNC1H1	1.39158	TLINELVK; ILDDDTIITTLENLK; EYQTQLIQR; TTDLLTDWEK; LVPLLLEDGGEAPAALEAALEEK; INEWLTLVEK; SLLQALNEVK	1.05106	VNFLPEIITLSK; TLINELVK; LVPLLLEDGGEAPAALEAALEEK; LNTQEIFDDWAR; INEWLTLVEK
Ubiquitin-conjugating enzyme E2 N	UBE2N	P61088	UBE2N	nd		NaN	ICLDILK
Disintegrin and metalloproteinase domain-containing protein 10	ADA10	O14672	ADAM10	nd		1.30756	AIDTIYQTTDFSGIR
60S ribosomal protein L31	RL31	P62899	RPL31	1.06108	SAINEVVTR; LYTLVTYVPVTTFK; NLQTVNVDEN	1.05853	IHGVGFK; LYTLVTYVPVTTFK; NLQTVNVDEN; SAINEVVTR
60S ribosomal protein L35a	RL35A	P18077	RPL35A	NaN	DETEFYLGK; AIFAGYK	NaN	DETEFYLGK; AIFAGYK
Beta-galactosidase	BGAL	P16278	GLB1	0.641292	TEAVASSLYDILAR	0.790222	TEAVASSLYDILAR
Dynactin subunit 2	DCTN2	Q13561	DCTN2	0.939252	VSALDLAVLDQVEAR; LLGPDAAINLTDPDGALAK; LTELETAVR; LLHEVQELTTEVEK; LQSVLGK; ENLATVEGNFASIDER	1.13789	VSALDLAVLDQVEAR; LLGPDAAINLTDPDGALAK; LTELETAVR; LQSVLGK
L-lactate dehydrogenase A chain	LDHA	P00338	LDHA	1.55857	SADTLWGIQK; QVVESAYEVIK; DQLIYNLLK; DLADELALVDVIEDK	2.94576	DDVFLSVPCILGQNGISDLVK; VTLTSEEEAR; SADTLWGIQK; FIIPNVVK; QVVESAYEVIK; DQLIYNLLK; TLHPDLGTDKDKEQWK; DLADELALVDVIEDK
Prostaglandin E synthase 3	TEBP	Q15185	PTGES3	nd		1.41232	HLNEIDLFHCIDPNDSK
40S ribosomal protein S14	RS14	P62263	RPS14	0.953464	IEDVTPIPSDSTR; TPGPGAQSALR	1.05531	ELGITALHIK; IEDVTPIPSDSTR; TPGPGAQSALR
Eukaryotic translation initiation factor 3 subunit H	EIF3H	O15372	EIF3H	nd		NaN	EFTAQNLGK
Probable ATP-dependent RNA helicase DDX17	DDX17	Q92841	DDX17	0.872171	VLEEANQAINPK; ELAQQVQQVADDYGK; WDLSELPK; SSQSSSQQFSGIGR; LIDFLESGK; DWVLNEFR; QLAEDFLR	0.867869	ELAQQVQQVADDYGK; WDLSELPK; SSQSSSQQFSGIGR; LIDFLESGK; DWVLNEFR; QLAEDFLR
Condensin complex subunit 3	CND3	Q9BPX3	NCAPG	nd		NaN	LNLAQFLNEDLS
Probable ATP-dependent RNA helicase DDX5	DDX5	P17844	DDX5	0.933015	QVSDLISVLR; TTYLVLDEADR; QLAEDFLK; LLQLVEDR; ELAQQVQQVAAEYCR; TAQEVETYR; GYSSLLK; NFYQEHPDLAR; LIDFLECGK	0.893077	QVSDLISVLR; TTYLVLDEADR; FVINYDYPNSSEDYIHR; LLQLVEDR; ELAQQVQQVAAEYCR; TAQEVETYR; TIVFVETK; QLAEDFLK; LIDFLECGK; GYSSLLK
PDZ and LIM domain protein 4	PDLI4	P50479	PDLIM4	NaN	VDLGSEVYR; EPAEPVAAEPK; GYFFLDER	0.278492	LGAPLSGLQGLPECTR; EPAEPVAAEPK
Acidic leucine-rich nuclear phosphoprotein 32 family member E	AN32E	Q9BTT0	ANP32E	nd		1.9301	SLDLFNCEITNLEDYR
40S ribosomal protein S18	RS18	P62269	RPS18	0.935201	YSQVLANGLDNK; LREDLER; IPDWFLNR; AGELTEDEVER	0.923452	VITIMQNPR; YSQVLANGLDNK; LREDLER; IPDWFLNR; AGELTEDEVER
Bifunctional glutamate/proline--tRNA ligase	SYEP	P07814	EPRS	0.932485	NQGGGLSSSGAGEGQGPK	NaN	NQGGGLSSSGAGEGQGPK
Anthrax toxin receptor 2	ANTR2	P58335	ANTXR2	NaN	LDALWALLR	nd
Solute carrier family 12 member 2	S12A2	P55011	SLC12A2	nd		NaN	QTPADGEASGESEPAK; LSGVEDHVK
Centriolin	CNTRL	Q7Z7A1	CNTRL	NaN	SEVKDEIR	nd
Cytochrome b5 type B	CYB5B	O43169	CYB5B	nd		NaN	GQEVETSVTYYR
Enoyl-CoA hydratase, mitochondrial	ECHM	P30084	ECHS1	1.15165	ICPVETLVEEAIQCAEK	1.59809	ICPVETLVEEAIQCAEK; ALNALCDGLIDELNQALK
Leucine-rich repeat serine/threonine-protein kinase 2	LRRK2	Q5S007	LRRK2	7.08269	GDSQIISLLLRR	nd
Phosphatidylethanolamine-binding protein 1	PEBP1	P30086	PEBP1	nd		NaN	LYEQLSGK
WD40 repeat-containing protein SMU1	SMU1	Q2TAY7	SMU1	1.0457	YIHLENLLAR; EGGDFVCCALSPR; DVEEEKFPTQLSR	0.974371	YIHLENLLAR; DTEMLATGAQDGK; EGGDFVCCALSPR
H/ACA ribonucleoprotein complex subunit 1	GAR1	Q9NY12	GAR1	NaN	VDEIFGQLR	NaN	DFYFSVK
Cytochrome b-c1 complex subunit Rieske, mitochondrial	UCRI	P47985	UQCRFS1	0.318773	EIEQEAAVELSQLR	0.439721	EIEQEAAVELSQLR
U5 small nuclear ribonucleoprotein 200 kDa helicase	U520	O75643	SNRNP200	0.837399	DIDAFWLQR; VELTITPDFQWDEK; TLVEDLFADK; NALLQLTDSQIADVAR	1.25678	TLVEDLFADK; DILCGAADEVLAVLK
Histone H1x	H1X	Q92522	H1FX	2.47069	GAPAAATAPAPTAHK; YSQLVVETIR	1.65381	GAPAAATAPAPTAHK; YSQLVVETIR
Transient receptor potential cation channel subfamily A member 1	TRPA1	O75762	TRPA1	nd		0.160886	LLQDISDTR
Translocon-associated protein subunit delta	SSRD	P51571	SSR4	0.934811	FFDEESYSLLR	1.09857	NNEDISIIPPLFTVSVDHR
26S proteasome non-ATPase regulatory subunit 3	PSMD3	O43242	PSMD3	NaN	ISLADIAQK	NaN	VYEFLDK
Striatin-3	STRN3	Q13033	STRN3	2.74001	DTEAPTAPQNSQLTWK; NQLLSCSADGTVR; MPTFESEETK; LWNLDSK; AYIASAGADALAK; LDESIYDVAFHSSK; VVSHPTLPVTITAHEDR; EFDFLVTAEDGEGAGEAR; IAFLQGER; SASLDVEPIYTFR; SLLGLSNSEPNGSVETK; YGTELNQGDLK; NLEQILNGGESPK; QYLQEVGYTDTILDVR	3.11161	DTEAPTAPQNSQLTWK; NQLLSCSADGTVR; LWNLDSK; MPTFESEETK; KLDESIYDVAFHSSK; ALAFHPVEPVLVTASEDHTLK; AYIASAGADALAK; LDESIYDVAFHSSK; VVSHPTLPVTITAHEDR; IAFLQGER; SASLDVEPIYTFR; SLLGLSNSEPNGSVETK; YGTELNQGDLK; NLEQILNGGESPK; QYLQEVGYTDTILDVR
Transcription elongation factor A protein 3	TCEA3	O75764	TCEA3	4.98877	TGGTTTDLFQCSK	NaN	TGGTTTDLFQCSK
Unconventional myosin-Ib	MYO1B	O43795	MYO1B	0.860556	LEASELFK	9.796	SGVEVLFNELEIPVEEYSFGR
NADH dehydrogenase [ubiquinone] flavoprotein 1, mitochondrial	NDUV1	P49821	NDUFV1	0.378691	YLVVNADEGEPGTCK; LLEGCLVGGR; GAGAYICGEETALIESIEGK; GPDWILGEIK; NACGSGYDFDVFVVR	0.403545	LLEGCLVGGR; IFTNLYGR; GAGAYICGEETALIESIEGK; GPDWILGEIK; YLVVNADEGEPGTCK; EAYEAGLIGK
Regulatory-associated protein of mTOR	RPTOR	Q8N122	RPTOR	NaN	SFKQFALQR	nd
FACT complex subunit SSRP1	SSRP1	Q08945	SSRP1	0.513281	FYVPPTQEDGVDPVEAFAQNVLSK	NaN	LFDFVNAK
Beta-actin-like protein 2	ACTBL	Q562R1	ACTBL2	0.730494	VAPDEHPILLTEAPLNPK	0.936501	VAPDEHPILLTEAPLNPK; CPEAIFQPSFLGIESSGIHETTFNSIMK; DLYANTVLSGGSTMYPGIADR; KDLYANTVLSGGSTMYPGIADR
High mobility group protein B2	HMGB2	P26583	HMGB2	nd		1.37642	SEHPGLSIGDTAK
Tropomodulin-4	TMOD4	Q9NZQ9	TMOD4	nd		14.392	SFSLVATR
Spindlin interactor and repressor of chromatin-binding protein	SPNDC	Q9BUA3	SPINDOC	NaN	GTLDLQVIR	0.760092	SNILEAWSEGVALLQDVR; GTLDLQVIR
Calcineurin subunit B type 1	CANB1	P63098	PPP3R1	nd		NaN	DTQLQQIVDK
Ribonucleoside-diphosphate reductase large subunit	RIR1	P23921	RRM1	nd		NaN	DDSIEGIYDTLK
NCK-interacting protein with SH3 domain	SPN90	Q9NZQ3	NCKIPSD	1.0287	LEVIFADLAR; AAAEAAVPR	NaN	LEVIFADLAR; HIADLSPGDK
Heterogeneous nuclear ribonucleoprotein D0	HNRPD	Q14103	HNRNPD	0.94602	EYFGGFGEVESIELPMDNK; LDPITGR; MFIGGLSWDTTK; IFVGGLSPDTPEEK	1.23683	EYFGGFGEVESIELPMDNK; EQYQQQQQWGSR; MFIGGLSWDTTK; IFVGGLSPDTPEEK; GFCFITFK; LDPITGR
Chloride intracellular channel protein 1	CLIC1	O00299	CLIC1	nd		1.08195	NSNPALNDNLEK; GFTIPEAFR; LAALNPESNTAGLDIFAK
L-lactate dehydrogenase B chain	LDHB	P07195	LDHB	1.72695	SADTLWDIQK; LIAPVAEEEATVPNNK; SLADELALVDVLEDK; GLTSVINQK; MVVESAYEVIK	1.76949	LKDDEVAQLK; SLADELALVDVLEDK; GLTSVINQK; SADTLWDIQK; FIIPQIVK; MVVESAYEVIK; LIAPVAEEEATVPNNK
6-pyruvoyl tetrahydrobiopterin synthase	PTPS	Q03393	PTS	0.630086	VYETDNNIVVYK	NaN	VYETDNNIVVYK
Glutamate receptor ionotropic, delta-2	GRID2	O43424	GRID2	0.0834153	GSRVPSKEDDK	nd
U2 small nuclear ribonucleoprotein A'	RU2A	P09661	SNRPA1	nd		NaN	GLLQSGQIPGR
Prolow-density lipoprotein receptor-related protein 1	LRP1	Q07954	LRP1	nd		2.90356	LDGLCIPLR
Serine/arginine-rich splicing factor 1	SRSF1	Q07955	SRSF1	0.962347	EAGDVCYADVYR; DGYDYDGYR; IYVGNLPPDIR; DGTGVVEFVR; GGPPFAFVEFEDPR; SHEGETAYIR; KEDMTYAVR; DAEDAVYGR	1.01011	EAGDVCYADVYR; IYVGNLPPDIR; DGYDYDGYR; GGPPFAFVEFEDPR; DGTGVVEFVR; SHEGETAYIR; DIEDVFYK; DAEDAVYGR
F-box only protein 32	FBX32	Q969P5	FBXO32	NaN	LDFSTAILDSR	NaN	LDFSTAILDSR
FAS-associated factor 2	FAF2	Q96CS3	FAF2	nd		NaN	NQTQVLR
28S ribosomal protein S28, mitochondrial	RT28	Q9Y2Q9	MRPS28	1.16853	AGGFASALER; LLDLELTSR	NaN	AGGFASALER; LLDLELTSR
Urea transporter 1	UT1	Q13336	SLC14A1	2.14782	ELANQLK; ALGYVTGDMK; VTYPEENR	2.65376	ALGYVTGDMK; VTYPEENR; IFYLQAK
Neurobeachin-like protein 2	NBEL2	Q6ZNJ1	NBEAL2	0.677483	LEAALGR	0.697377	LEAALGR
DnaJ homolog subfamily A member 1	DNJA1	P31689	DNAJA1	nd		2.2946	ITFHGEGDQEPGLEPGDIIIVLDQK
Protein S100-A13	S10AD	Q99584	S100A13	1.14528	SLDVNQDSELK	1.50648	SLDVNQDSELK
Lysine--tRNA ligase	SYK	Q15046	KARS	0.95877	YLDLILNDFVR	0.836361	SEEEFIHINNK; ILDDICVAK; LPETNLFETEETRK; YLDLILNDFVR
Septin-14	SEP14	Q6ZU15	SEPT14	0.956461	MIQQEEIR	nd
CCR4-NOT transcription complex subunit 1	CNOT1	A5YKK6	CNOT1	NaN	SPVTFLSDLR; LAEVGQYEQVK	NaN	DAIAALGLLQK; QLAVYEEFAR
Probable dimethyladenosine transferase	DIM1	Q9UNQ2	DIMT1	NaN	NPPPPINFQEWDGLVR	nd
Cytochrome c oxidase subunit 4 isoform 1, mitochondrial	COX41	P13073	COX4I1	0.387706	VNPIQGLASK; ASWSSLSMDEK; DHPLPEVAHVK; SEDFSLPAYMDR	0.48509	ESFAEMNR; DHPLPEVAHVK; ASWSSLSMDEK; HYVYGPLPQSFDK; VNPIQGLASK; SEDFSLPAYMDR
Myosin light polypeptide 6	MYL6	P60660	MYL6	1.1751	DQGTYEDYVEGLR; EAFQLFDR; EGNGTVMGAEIR; HVLVTLGEK	1.00714	EGNGTVMGAEIR; HVLVTLGEK; DQGTYEDYVEGLR; EAFQLFDR; NKDQGTYEDYVEGLR; VLDFEHFLPMLQTVAK
Elongation factor 1-gamma	EF1G	P26641	EEF1G	0.97894	EYFSWEGAFQHVGK; ILGLLDAYLK; AVLGEVK; KLDPGSEETQTLVR; DPFAHLPK; LDPGSEETQTLVR; TFLVGER; GQELAFPLSPDWQVDYESYTWR	1.48106	WFLTCINQPQFR; EYFSWEGAFQHVGK; ILGLLDAYLK; AVLGEVK; KLDPGSEETQTLVR; LDPGSEETQTLVR; TFLVGER; GQELAFPLSPDWQVDYESYTWR; STFVLDEFKR
Cysteine and glycine-rich protein 2	CSRP2	Q16527	CSRP2	1.72204	TVYHAEEVQCDGR	1.37064	TVYHAEEVQCDGR
26S proteasome non-ATPase regulatory subunit 1	PSMD1	Q99460	PSMD1	nd		NaN	DNLEWLAR
SH3 domain-binding glutamic acid-rich-like protein	SH3L1	O75368	SH3BGRL	1.04334	QQDVLGFLEANK; GDYDAFFEAR	1.36432	QQDVLGFLEANK; GDYDAFFEAR; VYIASSSGSTAIK
Filamin-B	FLNB	O75369	FLNB	0.902523	VVASGPGLEHGK; VFGPGVER; DQEFTVDTR; VEPAVDTSR; IEYNDQNDGSCDVK; SSTETCYSAIPK; AEISCIDNK; TATPEIVDNK; VTASGPGLSSYGVPASLPVDFAIDAR; DFLDGVYAFEYYPSTPGR; AGPGTLSVTIEGPSK; VKVEPAVDTSR; FNDEHIPESPYLVPVIAPSDDAR; SPFEVQVGPEAGMQK; TFEMSDFIVDTR; NTVELLVEDK; VTEAEIVPMGK; VEVGKDQEFTVDTR; IFFAGDTIPK; APSVATVGSICDLNLK; YADEEIPR; IPYLPITNFNQNWQDGK; DGTCTVTYLPTLPGDYSILVK; DAGYGGISLAVEGPSK; VDIQTEDLEDGTCK; VQAQGPGLK…	1.03178	VVASGPGLEHGK; VFGPGVER; DQEFTVDTR; VEPAVDTSR; IEYNDQNDGSCDVK; IFAQDGEGQR; AEISCIDNK; VLQSFTVDSSK; TATPEIVDNK; VTASGPGLSSYGVPASLPVDFAIDAR; DFLDGVYAFEYYPSTPGR; LGSAADFLLDISETDLSSLTASIK; AGPGTLSVTIEGPSK; VKVEPAVDTSR; QKDFLDGVYAFEYYPSTPGR; FNDEHIPESPYLVPVIAPSDDAR; SPFEVQVGPEAGMQK; KGEITGEVHMPSGK; SPFEVSVDK; VLSEDEEDVDFDIIHNANDTFTVK; TFEMSDFIVDTR; NTVELLVEDK; VTEAEIVPMGK; VEVGKDQEFTVDTR; IFFAGDTIPK; A…
Band 4.1-like protein 2	E41L2	O43491	EPB41L2	NaN	DYFGLLFQESPEQK; GLSPAQADSQFLENAK	1.21601	IVITGDGDIDHDQALAQAIR; VEGDNIYVR; VRPAELEQFESTIGFK; DYFGLLFQESPEQK
Small nuclear ribonucleoprotein F	RUXF	P62306	SNRPF	0.928531	GVEEEEEDGEMRE	1.41464	GVEEEEEDGEMRE
Pre-mRNA-splicing factor SPF27	SPF27	O75934	BCAS2	0.978391	EAAAALVEEETR	nd
Conserved oligomeric Golgi complex subunit 2	COG2	Q14746	COG2	0.00437263	KTTPANPVGPSGGMSDDDK	120.103	KTTPANPVGPSGGMSDDDK
Transcriptional activator protein Pur-alpha	PURA	Q00577	PURA	1.4166	VSEVKPTYR; FFFDVGSNK	NaN	FFFDVGSNK
Partner of Y14 and mago	PYM1	Q9BRP8	PYM1	NaN	QVEELQQR; ALEEELEDLELGL	NaN	QVEELQQR; AAPTAASDQPDSAATTEK
ATP-citrate synthase	ACLY	P53396	ACLY	nd		1.74517	EILIPVFK; DLVSSLTSGLLTIGDR
GMP synthase [glutamine-hydrolyzing]	GUAA	P49915	GMPS	nd		NaN	DEPDWESLIFLAR
Ragulator complex protein LAMTOR2	LTOR2	Q9Y2Q5	LAMTOR2	NaN	AQALVQYLEEPLTQVAAS	NaN	AQALVQYLEEPLTQVAAS
Elongation factor 2	EF2	P13639	EEF2	1.24151	VNFTVDQIR; FSVSPVVR; EDLYLKPIQR; EGIPALDNFLDKL; AGIIASAR; YVEPIEDVPCGNIVGLVGVDQFLVK; STLTDSLVCK; ETVSEESNVLCLSK; ALLELQLEPEELYQTFQR; EGALCEENMR	1.13367	VNFTVDQIR; FSVSPVVR; EDLYLKPIQR; EGIPALDNFLDKL; AGIIASAR; SDPVVSYR; YVEPIEDVPCGNIVGLVGVDQFLVK; STLTDSLVCK; NPADLPK; ETVSEESNVLCLSK; ALLELQLEPEELYQTFQR; STAISLFYELSENDLNFIK; GHVFEESQVAGTPMFVVK; EGALCEENMR; TFCQLILDPIFK
DnaJ homolog subfamily A member 3, mitochondrial	DNJA3	Q96EY1	DNAJA3	0.754864	FSQLAEAYEVLSDEVK	nd
Protein transport protein Sec61 subunit beta	SC61B	P60468	SEC61B	0.820579	PGPTPSGTNVGSSGR; FYTEDSPGLK	1.4818	PGPTPSGTNVGSSGR; FYTEDSPGLK
F-actin-capping protein subunit alpha-1	CAZA1	P52907	CAPZA1	0.760862	DVQDSLTVSNEAQTAK; FITHAPPGEFNEVFNDVR; EASDPQPEEADGGLK	0.872027	DVQDSLTVSNEAQTAK; FITHAPPGEFNEVFNDVR; EASDPQPEEADGGLK; TIDGQQTIIACIESHQFQPK
DENN domain-containing protein 5A	DEN5A	Q6IQ26	DENND5A	nd		6.05177	IMCHDDDDK
Tropomodulin-3	TMOD3	Q9NYL9	TMOD3	0.763982	QLETVLDDLDPENALLPAGFR; DNETLAELK; EHLLSYLEK	0.960223	QLETVLDDLDPENALLPAGFR
60S ribosomal protein L27	RL27	P61353	RPL27	1.08548	YSVDIPLDK; NIDDGTSDRPYSHALVAGIDR; DVFRDPALK	1.01429	VVLVLAGR; YSVDIPLDK; NIDDGTSDRPYSHALVAGIDR
AP-2 complex subunit mu	AP2M1	Q96CW1	AP2M1	1.43655	ASENAIVWK; LNYSDHDVIK; ESQISAEIELLPTNDK; QSIAIDDCTFHQCVR; SPVTNIAR; SISFIPPDGEFELMR; TFITQQGIK	1.03725	IPTPLNTSGVQVICMK; ASENAIVWK; LNYSDHDVIK; ESQISAEIELLPTNDK; GEVLISR; SNIWLAAVTK; QSIAIDDCTFHQCVR; NAVDAFR; SISFIPPDGEFELMR; DIILPFR; TFITQQGIK
Importin-5	IPO5	O00410	IPO5	1.2332	LVLEQVVTSIASVADTAEEK	1.19944	LVLEQVVTSIASVADTAEEK
Protein RCC2	RCC2	Q9P258	RCC2	1.37744	LFDFPGR	NaN	LFDFPGR; AVQDLCGWR
Angiomotin-like protein 1	AMOL1	Q8IY63	AMOTL1	NaN	VGGGPSPAQPAGK	NaN	VGGGPSPAQPAGK
Eukaryotic translation initiation factor 2A	EIF2A	Q9BY44	EIF2A	NaN	ETALLQELEDLELGI	nd
Dual serine/threonine and tyrosine protein kinase	DUSTY	Q6XUX3	DSTYK	NaN	LGSEIIDSSTRR	nd
Eukaryotic initiation factor 4A-III	IF4A3	P38919	EIF4A3	1.45153	EQIYDVYR	1.19415	ELAVQIQK
40S ribosomal protein S2	RS2	P15880	RPS2	1.04627	ATFDAISK; SPYQEFTDHLVK; GCTATLGNFAK; TYSYLTPDLWK; LSIVPVR; SLEEIYLFSLPIK; GTGIVSAPVPK	1.01067	SPYQEFTDHLVK; GAIILAK; ESEIIDFFLGASLK; GCTATLGNFAK; TYSYLTPDLWK; LSIVPVR; SLEEIYLFSLPIK; GTGIVSAPVPK
AP-1 complex subunit mu-1	AP1M1	Q9BXS5	AP1M1	0.0723632	MRVFLSGMPELR	nd
Vinculin	VINC	P18206	VCL	1.34695	GILSGTSDLLLTFDEAEVR; VLQLTSWDEDAWASK; ETVQTTEDQILK	1.44854	MSAEINEIIR; GNDIIAAAK; AVAGNISDPGLQK; QVATALQNLQTK; TNLLQVCER; ETVQTTEDQILK
MICOS complex subunit MIC19	MIC19	Q9NX63	CHCHD3	0.25088	YESHPVCADLQAK	nd
Casein kinase II subunit beta	CSK2B	P67870	CSNK2B	1.49578	GIAQMLEK; YQQGDFGYCPR; GNEFFCEVDEDYIQDK	1.37265	YQQGDFGYCPR
Eukaryotic translation initiation factor 3 subunit I	EIF3I	Q13347	EIF3I	1.08663	EGDLLFTVAK; LFDSTTLEHQK; SYSSGGEDGYVR	1.28127	QINDIQLSR; EGDLLFTVAK; SYSSGGEDGYVR
Progranulin	GRN	P28799	GRN	NaN	CPDGSTCCELPSGK	NaN	CPDGSTCCELPSGK
Heterogeneous nuclear ribonucleoprotein Q	HNRPQ	O60506	SYNCRIP	0.945569	LDEIYVAGLVAHSDLDER; EFNEDGALAVLQQFK; DLEGENIEIVFAKPPDQK; EQILEEFSK; LYNNHEIR; DLFEDELVPLFEK; DYAFIHFDER; NLANTVTEEILEK; AFSQFGK; TKEQILEEFSK; VTEGLTDVILYHQPDDK	0.950582	LDEIYVAGLVAHSDLDER; EFNEDGALAVLQQFK; VWGNVGTVEWADPIEDPDPEVMAK; DLEGENIEIVFAKPPDQK; EQILEEFSK; LYNNHEIR; DLFEDELVPLFEK; DYAFIHFDER; NLANTVTEEILEK; AFSQFGK; VTEGLTDVILYHQPDDK
Eukaryotic translation initiation factor 2 subunit 1	IF2A	P05198	EIF2S1	1.40458	HAVSDPSILDSLDLNEDER; INLIAPPR; VVTDTDETELAR; AGLNCSTENMPIK; NECVVVIR; TAWVFDDK; DEQLESLFQR; YVMTTTTLER	0.953236	INLIAPPR; DEQLESLFQR; EVLINNINR; VVTDTDETELAR; YVMTTTTLER
Small nuclear ribonucleoprotein Sm D2	SMD2	P62316	SNRPD2	0.99824	GDSVIVVLR; NPLIAGK; NNTQVLINCR; HCNMVLENVK; EEEEFNTGPLSVLTQSVK; SEMTPEELQK; REEEEFNTGPLSVLTQSVK	0.928273	REEEEFNTGPLSVLTQSVK; NNTQVLINCR; GDSVIVVLR; NPLIAGK; HCNMVLENVK
Small nuclear ribonucleoprotein Sm D1	SMD1	P62314	SNRPD1	0.818365	YFILPDSLPLDTLLVDVEPK; EPVQLETLSIR; NREPVQLETLSIR	1.17777	YFILPDSLPLDTLLVDVEPK; NREPVQLETLSIR
Adenylate cyclase type 1	ADCY1	Q08828	ADCY1	nd		NaN	AEIPFSNVMTCEDDDK
Eukaryotic translation initiation factor 4B	IF4B	P23588	EIF4B	0.928358	VAPAQPSEEGPGR; VDVADQAQDKDRDDR	1.12083	VAPAQPSEEGPGR; GLNISAVR; VDVADQAQDKDRDDR
Alpha-adducin	ADDA	P35611	ADD1	1.63386	TLASAGGPDNLVLLNPEK; VDENNPEYLR; INLQGDIVDR; SLVQGELVTASK	NaN	TLASAGGPDNLVLLNPEK; VDENNPEYLR; INLQGDIVDR; SLVQGELVTASK
Tubulin beta chain	TBB5	P07437	TUBB	1.13576	ISVYYNEATGGK; ALTVPELTQQVFDAK; FWEVISDEHGIDPTGTYHGDSDLQLDR	1.05546	ISVYYNEATGGK; ALTVPELTQQVFDAK; FWEVISDEHGIDPTGTYHGDSDLQLDR
Protein-glutamine gamma-glutamyltransferase 2	TGM2	P21980	TGM2	0.882509	SEGTYCCGPVPVR; NEFGEIQGDK; DLYLENPEIK; YLLNLNLEPFSEK; TVSYNGILGPECGTK; EDITHTYK; SLIVGLK	0.801867	SEGTYCCGPVPVR; NEFGEIQGDK; DLYLENPEIK; YLLNLNLEPFSEK; ALLVEPVINSYLLAER; TVSYNGILGPECGTK; SLIVGLK
Prefoldin subunit 3	PFD3	P61758	VBP1	nd		NaN	FLLADNLYCK
Phospholipid scramblase 1	PLS1	O15162	PLSCR1	nd		2.18077	EAFTDADNFGIQFPLDLDVK
Talin-1	TLN1	Q9Y490	TLN1	0.800252	LNEAAAGLNQAATELVQASR; ALEATTEHIR; ALSTDPAAPNLK; EGTETFADHR; IGITNHDEYSLVR; ALGDLISATK; NLGTALAELR; LAQAAQSSVATITR; VGAIPANALDDGQWSQGLISAAR; GTEWVDPEDPTVIAENELLGAAAAIEAAAK; VLVQNAAGSQEK; GLAGAVSELLR; GVAALTSDPAVQAIVLDTASDVLDK; ADAEGESDLENSR	0.791469	EQGVEEHETLLLR; AGFLDLK; AVTQALNR; LNEAAAGLNQAATELVQASR; ALGDLISATK; NLGTALAELR; LAQAAQSSVATITR; EADESLNFEEQILEAAK; VLVQNAAGSQEK; ADAEGESDLENSR; GLAGAVSELLR; GVAALTSDPAVQAIVLDTASDVLDK; MATNAAAQNAIK
Flap endonuclease 1	FEN1	P39748	FEN1	nd		NaN	LIADVAPSAIR; WSEPNEEELIK
Matrin-3	MATR3	P43243	MATR3	0.936091	GDADQASNILASFGLSAR; TEEGPTLSYGR; GPSLNPVLDYDHGSR; GAPPSSNIEDFHGLLPK; LAEPYGK; LCSLFYTNEEVAK; SQESGYYDR	0.949192	GDADQASNILASFGLSAR; GPSLNPVLDYDHGSR; GAPPSSNIEDFHGLLPK; LCSLFYTNEEVAK; ITPENLPQILLQLK; SQESGYYDR
Copine-1	CPNE1	Q99829	CPNE1	nd		3.55385	SDPFLEFFR; SDPLCVLLQDVGGGSWAELGR
Isoform 6 of Tropomyosin alpha-3 chain	TPM3	P06753-6	TPM3	1.03035	EQAEAEVASLNR; IQVLQQQADDAEER; LMDQNLK; EMDEQIR; KIQVLQQQADDAEER	0.892847	EQAEAEVASLNR; EMDEQIR; KIQVLQQQADDAEER; IQVLQQQADDAEERAER; IQVLQQQADDAEER; LMDQNLK
Isoform 2 of Gelsolin	GELS	P06396-2	GSN	0.987251	MVVEHPEFLK; VVEHPEFLK	0.916559	MVVEHPEFLK; VVEHPEFLK
Ubiquitin-like modifier-activating enzyme 1	UBA1	P22314	UBA1	1.52627	IYDDDFFQNLDGVANALDNVDAR; LAGTQPLEVLEAVQR; AENYDIPSADR	1.11934	IYDDDFFQNLDGVANALDNVDAR; DEFEGLFK; AENYDIPSADR; SLVASLAEPDFVVTDFAK
MARCKS-related protein	MRP	P49006	MARCKSL1	1.01369	GDVTAEEAAGASPAK; AAATPESQEPQAK	1.17203	GDVTAEEAAGASPAK; AAATPESQEPQAK; LSGLSFK
Inosine triphosphate pyrophosphatase	ITPA	Q9BY32	ITPA	nd		NaN	ALLELQEYFGSLAA
Rab GDP dissociation inhibitor beta	GDIB	P50395	GDI2	nd		1.26735	NPYYGGESASITPLEDLYK; FVSISDLLVPK; DLGTESQIFISR
LIM and SH3 domain protein 1	LASP1	Q14847	LASP1	1.31838	TQDQISNIK; EPAAPVSIQR; QQSELQSQVR; GFSVVADTPELQR	1.40042	QSFTMVADTPENLR; TQDQISNIK; EPAAPVSIQR; QQSELQSQVR; GFSVVADTPELQR
Protein disulfide-isomerase A3	PDIA3	P30101	PDIA3	0.928621	YGVSGYPTLK; LAPEYEAAATR; DGEEAGAYDGPR; TADGIVSHLK; SEPIPESNDGPVK; TFSHELSDFGLESTAGEIPVVAIR; DASIVGFFDDSFSEAHSEFLK	1.37751	YGVSGYPTLK; QAGPASVPLR; LAPEYEAAATR; ELSDFISYLQR; DGEEAGAYDGPR; TADGIVSHLK; SEPIPESNDGPVK; TFSHELSDFGLESTAGEIPVVAIR; DASIVGFFDDSFSEAHSEFLK; FLQDYFDGNLK
Calreticulin	CALR	P27797	CALR	1.22047	SGTIFDNFLITNDEAYAEEFGNETWGVTK; HEQNIDCGGGYVK; FYGDEEKDK; EQFLDGDGWTSR; FVLSSGK	1.42808	IKDPDASKPEDWDER; HEQNIDCGGGYVK; FVLSSGK; IDNSQVESGSLEDDWDFLPPKK; SGTIFDNFLITNDEAYAEEFGNETWGVTK; QIDNPDYK; FYGDEEKDK; EQFLDGDGWTSR
U6 snRNA-associated Sm-like protein LSm7	LSM7	Q9UK45	LSM7	NaN	ESILDLSK	nd
Peroxiredoxin-6	PRDX6	P30041	PRDX6	1.41846	DINAYNCEEPTEK; LPFPIIDDR; DFTPVCTTELGR; NFDEILR	1.4051	DFTPVCTTELGR; PGGLLLGDVAPNFEANTTVGR; DINAYNCEEPTEK; LSILYPATTGR; NFDEILR; LPFPIIDDR; LIALSIDSVEDHLAWSK
Coatomer subunit beta'	COPB2	P35606	COPB2	1.12589	EAFVVEEWVK; GSNNVALGYDEGSIIVK; QLAELAISK; GVNCIDYYSGGDKPYLISGADDR; TFEVCDLPVR; DNNQFASASLDR; VFNYNTLER; LPEAAFLAR; AAESLADPTEYENLFPGLK; LESTLNYGMER	1.29145	VLPTIPK; GSNNVALGYDEGSIIVK; QLAELAISK; AAESLADPTEYENLFPGLK; TFEVCDLPVR; DNNQFASASLDR; VFNYNTLER; LPEAAFLAR; GVNCIDYYSGGDKPYLISGADDR
Serine beta-lactamase-like protein LACTB, mitochondrial	LACTB	P83111	LACTB	2.31391	IALEFDKDR	nd
28S ribosomal protein S16, mitochondrial	RT16	Q9Y3D3	MRPS16	nd		NaN	LVALNLDR
Glycine--tRNA ligase	GARS	P41250	GARS	nd		3.80468	AEISELPSIVQDLANGNITWADVEAR; TLYVEEVVPNVIEPSFGLGR; LGDAVEQGVINNTVLGYFIGR
Transcription factor SOX-3	SOX3	P41225	SOX3	nd		0.104259	SPRVPADLAR
DnaJ homolog subfamily B member 11	DJB11	Q9UBS4	DNAJB11	1.50062	FQDLGAAYEVLSDSEK	nd
Neuroblastoma-amplified sequence	NBAS	A2RRP1	NBAS	NaN	LATVMLTR	5.20047	LATVMLTR
ATP-dependent DNA helicase Q5	RECQ5	O94762	RECQL5	nd		3.65153	KELLADLER
DNA replication licensing factor MCM3	MCM3	P25205	MCM3	1.56548	ELISDNQYR	0.919768	ELISDNQYR
Proteasomal ubiquitin receptor ADRM1	ADRM1	Q16186	ADRM1	1.74248	SQSAAVTPSSTTSSTR	1.22299	SQSAAVTPSSTTSSTR
Serine/threonine-protein phosphatase PP1-beta catalytic subunit	PP1B	P62140	PPP1CB	nd		5.90776	LFEYGGFPPEANYLFLGDYVDR
Voltage-dependent calcium channel gamma-6 subunit	CCG6	Q9BXT2	CACNG6	nd		NaN	GAEFLLR
Transformer-2 protein homolog beta	TRA2B	P62995	TRA2B	0.884593	GFAFVYFENVDDAK; YGPIADVSIVYDQQSR; VDFSITK	1.11201	GFAFVYFENVDDAK; AAQDRDQIYR; VDFSITK
Septin-7	SEPT7	Q16181	SEPT7	0.917933	IYEFPETDDEEENK; FEDYLNAESR; ANWEAQQR; ADTLTPEECQQFK	1.1442	LAAVTYNGVDNNK; IYEFPETDDEEENK; FEDYLNAESR; DVTNNVHYENYR
Regulator of G-protein signaling 20	RGS20	O76081	RGS20	NaN	ADLPTWEESPAPTLEEVNAWAQSFDK	nd
Protein flightless-1 homolog	FLII	Q13045	FLII	0.666428	EGEEATAEAEEK; LLQSLLDTR; NAEAVLQSPGLSGK; GMSDVAQEK; FVFLLDR; LDDLSVLDLSHNQLTECPR; TGLCYLPEELAALQK; ADLTALFLPR	0.824141	TQSNLPTSLEGLSNLADVDLSCNDLTR; NAEAVLQSPGLSGK; ADLTALFLPR; FVFLLDR; LLQSLLDTR
CAD protein	PYR1	P27708	CAD	NaN	EATAGNPGGQTVR	NaN	EATAGNPGGQTVR
Stathmin	STMN1	P16949	STMN1	nd		0.259712	AIEENNNFSK
Leucine-rich repeat and calponin homology domain-containing protein 2	LRCH2	Q5VUJ6	LRCH2	nd		1.25221	ILNHSTSVMR
Leucine-rich repeat-containing protein 59	LRC59	Q96AG4	LRRC59	0.783115	LQQLPADFGR; VAGDCLDEK; DKLDGNELDLSLSDLNEVPVK	1.115	LQQLPADFGR; LVNLQHLDLLNNK; VAGDCLDEK; LVTLPVSFAQLK; LTTLPSDFCGLTHLVK; DKLDGNELDLSLSDLNEVPVK
T-complex protein 1 subunit alpha	TCPA	P17987	TCP1	1.16735	ICDDELILIK; SSLGPVGLDK; HGSYEDAVHSGALND; YINENLIVNTDELGR; EQLAIAEFAR; VLCELADLQDK; SLHDALCVVK	1.44841	HGSYEDAVHSGALND; EVGDGTTSVVIIAAELLK; DCLINAAK; ICDDELILIK; EQLAIAEFAR
Hypoxia up-regulated protein 1	HYOU1	Q9Y4L1	HYOU1	0.800276	VESVFETLVEDSAEEESTLTK	1.58259	VESVFETLVEDSAEEESTLTK
TATA-binding protein-associated factor 2N	RBP56	Q92804	TAF15	0.673853	TDADSESDNSDNNTIFVQGLGEGVSTDQVGEFFK	nd
Actin, cytoplasmic 1	ACTB	P60709	ACTB	NaN	DDDIAALVVDNGSGMCK	NaN	DDDIAALVVDNGSGMCK
Ras GTPase-activating protein-binding protein 1	G3BP1	Q13283	G3BP1	1.70482	LPNFGFVVFDDSEPVQK; SSSPAPADIAQTVQEDLR; DFFQSYGNVVELR; FYVHNDIFR; HPDSHQLFIGNLPHEVDK	1.58192	TFSWASVTSK; LPNFGFVVFDDSEPVQK; FYVHNDIFR; QYYTLLNQAPDMLHR; DFFQSYGNVVELR; INIPPQR
N-acylneuraminate-9-phosphatase	NANP	Q8TBE9	NANP	NaN	AMLTELR	nd
ATP-dependent RNA helicase DHX30	DHX30	Q7L2E3	DHX30	0.719627	AVAGWEEVLR; AVDEAVILLQEIGVLDQR	0.95573	AVDEAVILLQEIGVLDQR
ATP synthase subunit delta, mitochondrial	ATPD	P30049	ATP5F1D	nd		0.939081	IEANEALVK
60S ribosomal protein L19	RL19	P84098	RPL19	1.01551	VWLDPNETNEIANANSR; LLADQAEAR	1.18061	VWLDPNETNEIANANSR
Kinectin	KTN1	Q86UP2	KTN1	7.95764	STYVTEVR; SVEELLEAELLK	0.657662	SVEELLEAELLK
Unconventional myosin-Ic	MYO1C	O00159	MYO1C	1.04966	GEELLSPLNLEQAAYAR; TLFATEDALEVR; DGTIDFTPGSELLITK; IICDLVEEK	1.25372	GIISILDEECLRPGEATDLTFLEK; DGTIDFTPGSELLITK
Cytospin-A	CYTSA	Q69YQ0	SPECC1L	0.53034	SSTSSEPTPTVK; AETLASSLQEDLAHTR; AQLGINEDHSEGDEK; SDIQDLLESVR; DLLTLAK; VAELYSIHNSGDK; ETIFELEDEVEQHR	0.835236	SDIQDLLESVR; DLLTLAK; AETLASSLQEDLAHTR
Multifunctional methyltransferase subunit TRM112-like protein	TR112	Q9UI30	TRMT112	nd		NaN	GPVEGYEENEEFLR
Protein S100-A6	S10A6	P06703	S100A6	0.717308	ELTIGSK; LQDAEIAR; LMEDLDR	0.935767	ELTIGSK; LQDAEIAR; LMEDLDR
Coatomer subunit gamma-1	COPG1	Q9Y678	COPG1	NaN	AIVDCIISIIEENSESK	1.12539	AIVDCIISIIEENSESK; DSPLFDFIESCLR; QEIFQEQLAAVPEFR; ETGLSHLCEFIEDCEFTVLATR; SLEELPVDIILASVG
MAP kinase-activated protein kinase 2	MAPK2	P49137	MAPKAPK2	0.109445	ARALEAAALAH	nd
PDZ and LIM domain protein 1	PDLI1	O00151	PDLIM1	NaN	DFEQPLAISR; VWSPLVTEEGKR	0.953689	DFEQPLAISR; VWSPLVTEEGKR
Calmodulin-regulated spectrin-associated protein 1	CAMP1	Q5T5Y3	CAMSAP1	nd		NaN	QQLLESPAHQK
Ribose-phosphate pyrophosphokinase 1	PRPS1	P60891	PRPS1	NaN	NCTIVSPDAGGAK	nd
40S ribosomal protein S19	RS19	P39019	RPS19	1.01743	ALAAFLK; DVNQQEFVR; VPEWVDTVK; NGVMPSHFSR; RVLQALEGLK; ELAPYDENWFYTR; VLQALEGLK; PGVTVKDVNQQEFVR; LKVPEWVDTVK	1.03478	ALAAFLK; DVNQQEFVR; VPEWVDTVK; NGVMPSHFSR; RVLQALEGLK; ELAPYDENWFYTR; VLQALEGLK; LKVPEWVDTVK
RNA-binding protein 39	RBM39	Q14498	RBM39	0.900761	DLEEFFSTVGK; TDASSASSFLDSDELER	0.995896	DLEEFFSTVGK; GIFEPFGR
Polyadenylate-binding protein-interacting protein 1	PAIP1	Q9H074	PAIP1	nd		NaN	IENVVLDANCSR
Leukocyte surface antigen CD47	CD47	Q08722	CD47	1.26327	STVPTDFSSAK; IEVSQLLK	NaN	IEVSQLLK
Protein PAT1 homolog 1	PATL1	Q86TB9	PATL1	nd		NaN	LAELEEK
Myoferlin	MYOF	Q9NZM1	MYOF	1.2256	LISLLNEK; WLLLNDPEDTSSGSK; IYNCELENVAEFEGLTDFSDTFK; KLEPISNDDLLVVEK; STLAEIEDWLDK; TQGLVPEHVETR; VGETIIDLENR	1.62828	LISLLNEK; SDENEDPSVVGEFK; VIVESASNIPK; SLSQIHEAAVR; SLDGEGNFNWR; DLTQTASSTAR; LTIYDWDR; ANVTVLDTQIR; GPVGTVSEAQLAR; IPANQLAELWLK; WLLLNDPEDTSSGSK; ISVYDYDTFTR; STLAEIEDWLDK; TQGLVPEHVETR; VGETIIDLENR
Suprabasin	SBSN	Q6UWP8	SBSN	NaN	FGQGAHHAAGQAGNEAGR	nd
Serine/threonine-protein phosphatase PP1-alpha catalytic subunit	PP1A	P62136	PPP1CA	1.12527	LNLDSIIGR; NVQLTENEIR	1.2477	LNLDSIIGR; NVQLTENEIR
Guanine nucleotide-binding protein subunit alpha-12	GNA12	Q03113	GNA12	1.19933	DIDALLAR	nd
Eukaryotic translation initiation factor 2 subunit 2	IF2B	P20042	EIF2S2	0.956786	EVEPEPTEDKDLEADEEDTR; DASDDLDDLNFFNQK; TGFQAVTGK; TSFVNFTDICK; LYFLQCETCHSR; DYTYEELLNR; IFDIDEAEEGVK; SPDTILQK	1.15339	DASDDLDDLNFFNQK; TGFQAVTGK; TSFVNFTDICK; LYFLQCETCHSR; IFDIDEAEEGVK; SPDTILQK
Ankycorbin	RAI14	Q9P0K7	RAI14	0.783439	IQQLQEILQDLQK; VLNELTQLK; LLQAVENGDAEK	0.879655	IQQLQEILQDLQK; VLNELTQLK; LLQAVENGDAEK
Pericentriolar material 1 protein	PCM1	Q15154	PCM1	NaN	LLGELHTLR	NaN	LLGELHTLR
E3 ubiquitin-protein ligase CHIP	CHIP	Q9UNE7	STUB1	nd		NaN	WNSIEER
CD59 glycoprotein	CD59	P13987	CD59	0.905252	LRENELTYYCCK; FEHCNFNDVTTR; AGLQVYNK; ENELTYYCCK	1.24054	AGLQVYNK; FEHCNFNDVTTR; LRENELTYYCCK; ENELTYYCCK
Reticulocalbin-2	RCN2	Q14257	RCN2	1.37505	NGDGFVSLEEFLGDYR; EALLGVQEDVDEYVK; LSEEEILENPDLFLTSEATDYGR; WDPTANEDPEWILVEK	1.05942	NGDGFVSLEEFLGDYR; LSEEEILENPDLFLTSEATDYGR; EALLGVQEDVDEYVK
SPARC	SPRC	P09486	SPARC	nd		NaN	LEAGDHPVELLAR
CCR4-NOT transcription complex subunit 7	CNOT7	Q9UIV1	CNOT7	NaN	GGLQEVAEQLELER	nd
Cytochrome c oxidase subunit NDUFA4	NDUA4	O00483	NDUFA4	NaN	LALFNPDVCWDR	NaN	FYSVNVDYSK; LALFNPDVCWDR
Misshapen-like kinase 1	MINK1	Q8N4C8	MINK1	1.52702	GSVVNVNPTNTR	2.22131	GSVVNVNPTNTR
Ragulator complex protein LAMTOR5	LTOR5	O43504	LAMTOR5	nd		NaN	GTLSDEHAGVISVLAQQAAK
Endothelial differentiation-related factor 1	EDF1	O60869	EDF1	nd		NaN	VTLEVGK
Cartilage-associated protein	CRTAP	O75718	CRTAP	nd		NaN	EVLADFQR
ADP/ATP translocase 2	ADT2	P05141	SLC25A5	NaN	QIFLGGVDKR; AAYFGIYDTAK	NaN	AAYFGIYDTAK
Proliferation-associated protein 2G4	PA2G4	Q9UQ80	PA2G4	1.18634	AFFSEVER; TIIQNPTDQQK; LVKPGNQNTQVTEAWNK; SDQDYILK; ALLQSSASR	1.14053	HELLQPFNVLYEK; AFFSEVER; SEMEVQDAELK; SDQDYILK; ITSGPFEPDLYK; LVKPGNQNTQVTEAWNK; ALLQSSASR
Mitochondrial import receptor subunit TOM40 homolog	TOM40	O96008	TOMM40	0.314356	GSVDSNWIVGATLEK; RPGEEGTVMSLAGK; ELFPIQMEGVK	0.315881	GSVDSNWIVGATLEK; ELFPIQMEGVK; RPGEEGTVMSLAGK; FVNWQVDGEYR
Nucleosome assembly protein 1-like 1	NP1L1	P55209	NAP1L1	0.990497	LDGLVETPTGYIESLPR; YAVLYQPLFDK; EQSELDQDLDDVEEVEEEETGEETK; NVDLLSDMVQEHDEPILK	1.13186	FEIINAIYEPTEEECEWKPDEEDEISEELK; GIPEFWLTVFK; LDGLVETPTGYIESLPR; EQSELDQDLDDVEEVEEEETGEETK; YAVLYQPLFDK; NVDLLSDMVQEHDEPILK
Transgelin-2	TAGL2	P37802	TAGLN2	1.29821	QMEQISQFLQAAER; ENFQNWLK; NFSDNQLQEGK; YGINTTDIFQTVDLWEGK; DDGLFSGDPNWFPK; DGTVLCELINALYPEGQAPVK; GPAYGLSR	1.14532	QMEQISQFLQAAER; ENFQNWLK; DDGLFSGDPNWFPK; YGINTTDIFQTVDLWEGK; TLMNLGGLAVAR; NFSDNQLQEGK; DGTVLCELINALYPEGQAPVKK; DGTVLCELINALYPEGQAPVK; QYDADLEQILIQWITTQCR; NVIGLQMGTNR
NADH dehydrogenase [ubiquinone] 1 beta subcomplex subunit 10	NDUBA	O96000	NDUFB10	nd		NaN	YQDLGAYSSAR
WD repeat-containing protein 82	WDR82	Q6UXN9	WDR82	NaN	YGVDLIR	nd
Ragulator complex protein LAMTOR3	LTOR3	Q9UHA4	LAMTOR3	1.83564	ELAPLFEELR	nd
60S ribosomal protein L18a	RL18A	Q02543	RPL18A	1.21823	DLTTAGAVTQCYR; SSGEIVYCGQVFEK; NFGIWLR	1.21394	DLTTAGAVTQCYR; SSGEIVYCGQVFEK; NFGIWLR
Apoptosis-inducing factor 1, mitochondrial	AIFM1	O95831	AIFM1	nd		NaN	LNDGSQITYEK
40S ribosomal protein S24	RS24	P62847	RPS24	1.40232	TTGFGMIYDSLDYAK	1.39019	TTGFGMIYDSLDYAK; QMVIDVLHPGK
Alpha-actinin-1	ACTN1	P12814	ACTN1	1.01678	IMSIVDPNR; NYITMDELR; AGTQIENIEEDFRDGLK; LLETIDQLYLEYAK; DYETATLSEIK; ATLPDADKER; LSNRPAFMPSEGR; MLDAEDIVGTARPDEK; DHSGTLGPEEFK; MVSDINNAWGCLEQVEK; HRPELIDYGK; VLAVNQENEQLMEDYEK; IDQLEGDHQLIQEALIFDNK; ACLISLGYDIGNDPQGEAEFAR; ICDQWDNLGALTQK; GISQEQMNEFR; ETADTDTADQVMASFK; VEQIAAIAQELNELDYYDSPSVNAR; KDDPLTNLNTAFDVAEK; DDPLTNLNTAFDVAEK; QKDYETATLSEIK; SIVNYKPK	0.853824	IMSIVDPNR; DGLGFCALIHR; NYITMDELR; LLETIDQLYLEYAK; DYETATLSEIK; ATLPDADKER; HRPELIDYGK; LSNRPAFMPSEGR; MLDAEDIVGTARPDEK; DHSGTLGPEEFK; MVSDINNAWGCLEQVEK; LAILGIHNEVSK; VLAVNQENEQLMEDYEK; IDQLEGDHQLIQEALIFDNK; ACLISLGYDIGNDPQGEAEFAR; ICDQWDNLGALTQK; GISQEQMNEFR; ETADTDTADQVMASFK; VEQIAAIAQELNELDYYDSPSVNAR; KDDPLTNLNTAFDVAEK; DDPLTNLNTAFDVAEK; QKDYETATLSEIK; SIVNYKPK
Isoform 5 of Tropomyosin alpha-1 chain	TPM1	P09493-5	TPM1	nd		NaN	SLQEQADAAEER
Spectrin beta chain, non-erythrocytic 2	SPTN2	O15020	SPTBN2	0.646846	SLDDFQAWLGR; LEALGTGWEELGR; DVEDEILWVTER	nd
Single-stranded DNA-binding protein, mitochondrial	SSBP	Q04837	SSBP1	0.554102	SGDSEVYQLGDVSQK; QATTIIADNIIFLSDQTK	0.679556	VGQDPVLR; QATTIIADNIIFLSDQTK; SGDSEVYQLGDVSQK
Semaphorin-7A	SEM7A	O75326	SEMA7A	0.772714	SEGLLACGTNAR; DCENYITLLER; VYLFDFPEGK; AMLVCSDAATNK; SVLQSINPAEPHK; ATIVHQDQAYDDK; LQDVFLLPDPSGQWR; GDQGGESSLSVSK	1.00001	SEGLLACGTNAR; DCENYITLLER; VSLAPNSR; VYLFDFPEGK; GDQGGESSLSVSK; SVLQSINPAEPHK; ATIVHQDQAYDDK; LQDVFLLPDPSGQWR
G patch domain-containing protein 4	GPTC4	Q5T3I0	GPATCH4	0.730928	NDADEKHPEHAEQNIR	nd
Protein Shroom3	SHRM3	Q8TF72	SHROOM3	nd		NaN	SSPATADKR
C-terminal-binding protein 2	CTBP2	P56545	CTBP2	nd		3.10192	GAALDVHESEPFSFAQGPLK
Cytochrome b-c1 complex subunit 9	QCR9	Q9UDW1	UQCR10	nd		0.468695	LYSLLFR; AFDQGADAIYDHINEGK
Prolyl 4-hydroxylase subunit alpha-1	P4HA1	P13674	P4HA1	1.31912	LNTEWSELENLVLK; LQDTYNLDTDTISK	1.39978	LNTEWSELENLVLK; FHDIISDAEIEIVK; LQDTYNLDTDTISK
Isoform 2 of Mitogen-activated protein kinase kinase kinase kinase 4	M4K4	O95819-2	MAP4K4	NaN	NSTSSIEPR	nd
Probable ubiquitin carboxyl-terminal hydrolase FAF-X	USP9X	Q93008	USP9X	0.0513415	ALGHPAMLSK	nd
Fragile X mental retardation syndrome-related protein 1	FXR1	P51114	FXR1	NaN	CTVDVPEDLR	nd
Vigilin	VIGLN	Q00341	HDLBP	0.924212	VIFPAAEDKDQDLITIIGK; IEGDPQGVQQAK	0.633337	VIFPAAEDKDQDLITIIGK
Clathrin heavy chain 1	CLH1	Q00610	CLTC	1.97233	EVCFACVDGK; LDASESLR; AVDVFFPPEAQNDFPVAMQISEK; LAELEEFINGPNNAHIQQVGDR; KDPELWGSVLLESNPYR; GQCDLELINVCNENSLFK; FNALFAQGNYSEAAK; NNLAGAEELFAR; IHEGCEEPATHNALAK; LASTLVHLGEYQAAVDGAR; RPLIDQVVQTALSETQDPEEVSVTVK; KFNALFAQGNYSEAAK; HSSLAGCQIINYR; DTELAEELLQWFLQEEK; NNRPSEGPLQTR; EAIDSYIK; ISGETIFVTAPHEATAGIIGVNR; VSQPIEGHAASFAQFK; VANVELYYR; DAMQYASESK; ENPYYDSR; ESYVETELIFALAK; VMEYINR; NLILVVR; LDNYD…	1.35791	EVCFACVDGK; LDASESLR; AVDVFFPPEAQNDFPVAMQISEK; LAELEEFINGPNNAHIQQVGDR; KDPELWGSVLLESNPYR; GQCDLELINVCNENSLFK; FNALFAQGNYSEAAK; NNLAGAEELFAR; IHEGCEEPATHNALAK; LASTLVHLGEYQAAVDGAR; FQSVPAQPGQTSPLLQYFGILLDQGQLNK; RPLIDQVVQTALSETQDPEEVSVTVK; HSSLAGCQIINYR; DTELAEELLQWFLQEEK; NNRPSEGPLQTR; KFDVNTSAVQVLIEHIGNLDR; ISGETIFVTAPHEATAGIIGVNR; VSQPIEGHAASFAQFK; VANVELYYR; DAMQYASESK; ENPYYDSR; ESYVETELIFALA…
Protein FAM49B	FA49B	Q9NUQ9	FAM49B	1.22041	DAEGILEDLQSYR	1.64474	DAEGILEDLQSYR
Isoform 2 of NADH dehydrogenase [ubiquinone] flavoprotein 3, mitochondrial	NDUV3	P56181-2	NDUFV3	NaN	GSPAPAVLAEEAR	1.00778	LLATQTAAELSK; GSPAPAVLAEEAR
MAGUK p55 subfamily member 5	MPP5	Q8N3R9	MPP5	1.14307	ILEIEDLFSSLK	nd
60S ribosomal protein L15	RL15	P61313	RPL15	1.06938	YIQELWR; VLNSYWVGEDSTYK	1.08086	QGYVIYR; YIQELWR; SLQSVAEER; FFEVILIDPFHK; VLNSYWVGEDSTYK
PDZ domain-containing protein GIPC1	GIPC1	O14908	GIPC1	1.35675	DTELAATMVELGK; APPLVENEEAEPGR; NPDELAEALDER; GPATVEDLPSAFEEK	1.40025	DTELAATMVELGK; APPLVENEEAEPGR; NPDELAEALDER; GPATVEDLPSAFEEK
Poly [ADP-ribose] polymerase 1	PARP1	P09874	PARP1	NaN	ELLIFNK	0.667927	TTNFAGILSQGLR; QQVPSGESAILDR
ATP-dependent RNA helicase DDX3X	DDX3X	O00571	DDX3X	0.931085	SFLLDLLNATGK; VVWVEESDKR; VGNLGLATSFFNER; GLDISNVK; SDYDGIGSR	0.82549	SFLLDLLNATGK; VVWVEESDKR; VGNLGLATSFFNER; TAAFLLPILSQIYSDGPGEALR; SDYDGIGSR
Heterogeneous nuclear ribonucleoprotein L	HNRPL	P14866	HNRNPL	1.02995	NDQDTWDYTNPNLSGQGDPGSNPNKR; TPASPVVHIR; SSSGLLEWESK; TDNAGDQHGGGGGGGGGAGAAGGGGGGENYDDPHK; ASLNGADIYSGCCTLK	0.981059	NDQDTWDYTNPNLSGQGDPGSNPNKR; TPASPVVHIR; LCFSTAQHAS; SDALETLGFLNHYQMK; SSSGLLEWESK; TDNAGDQHGGGGGGGGGAGAAGGGGGGENYDDPHK; FSTPEQAAK; ASLNGADIYSGCCTLK
Guanine nucleotide-binding protein G(q) subunit alpha	GNAQ	P50148	GNAQ	1.57631	IIHGSGYSDEDKR	1.73881	IIHGSGYSDEDKR; VPTTGIIEYPFDLQSVIFR
Protein TFG	TFG	Q92734	TFG	NaN	LLSNDEVTIK; AQLGEDIR	0.691618	LLSNDEVTIK; AQLGEDIR
Tropomyosin alpha-1 chain	TPM1	P09493	TPM1	1.03752	CAELEEELK; MEIQEIQLK; KLVIIESDLER; QLEDELVSLQK; LVIIESDLER	1.0106	EDRYEEEIK; QLEDELVSLQK; LVIIESDLER; CAELEEELK; MEIQEIQLK; KLVIIESDLER
Lebercilin-like protein	LCA5L	O95447	LCA5L	NaN	QLAIETR	nd
Clathrin light chain A	CLCA	P09496	CLTA	1.85638	ELEEWYAR; LEALDANSR; LCDFNPK; LQSEPESIR	1.47173	ELEEWYAR; LEALDANSR; LCDFNPK; LQSEPESIR
Clathrin light chain B	CLCB	P09497	CLTB	1.99846	DLEEWNQR; EETPGTEWEK; LTQEPESIR; LQELDAASK; VAQLCDFNPK; VTEQEWR; SVLMSLK	1.45487	VAQLCDFNPK; VTEQEWR; SVLMSLK; LTQEPESIR; LQELDAASK
14-3-3 protein zeta/delta	1433Z	P63104	YWHAZ	0.922795	GIVDQSQQAYQEAFEISK; YLAEVAAGDDKK; FLIPNASQAESK; YLAEVAAGDDK; SVTEQGAELSNEER; EKIETELR; DICNDVLSLLEK; YDDMAACMK; TAFDEAIAELDTLSEESYK	0.959957	GIVDQSQQAYQEAFEISK; YLAEVAAGDDKK; YDDMAACMK; YLAEVAAGDDK; SVTEQGAELSNEER; EKIETELR; DICNDVLSLLEK; FLIPNASQAESK; TAFDEAIAELDTLSEESYK
Protein farnesyltransferase/geranylgeranyltransferase type-1 subunit alpha	FNTA	P49354	FNTA	0.512903	DPSQELEFIADILNQDAK; HSTENDSPTNVQQ	NaN	HSTENDSPTNVQQ
Signal recognition particle 9 kDa protein	SRP09	P49458	SRP9	1.1887	LYLADPMK; VTDDLVCLVYK; PQYQTWEEFSR	1.1484	VTDDLVCLVYK; PQYQTWEEFSR
Intraflagellar transport protein 122 homolog	IF122	Q9HBG6	IFT122	8.65631	SMSRRDVLIK	nd
Transcription intermediary factor 1-beta	TIF1B	Q13263	TRIM28	0.890711	ADVQSIIGLQR; DHQYQFLEDAVR; LDLDLTADSQPPVFK	1.05332	LLASLVK; DHQYQFLEDAVR
c-Myc-binding protein	MYCBP	Q99417	MYCBP	NaN	LAQYEPPQEEK	1.54917	LAQYEPPQEEK; SGVLDTLTK
Ras GTPase-activating-like protein IQGAP1	IQGA1	P46940	IQGAP1	0.506524	QSGQTDPLQK; IPADTFAALK; ILAIGLINEALDEGDAQK; EEIQSSISGVTAAYNR; FFQTACDVPELQDK; TDPVDIYK; ATFYGEQVDYYK; YQELINDIAR; TLQALQIPAAK; LPYDVTPEQALAHEEVK; IFYPETTDIYDR; EQLWLANEGLITR; LEGVLAEVAQHYQDTLIR; QLSSSVTGLTNIEEENCQR; GLQQQNSDWYLK; VDQIQEIVTGNPTVIK; EDSNLTLQEK; QILAPVVK; GVLLEIEDLQVNQFK; FALGIFAINEAVESGDVGK; ITLQDVVSHSK; SNQQLENDLNLMDIK; LGLAPQIQDLYGK; NVIFEISPTEEVGDFEVK; TILLNTK; LTAEEMDER; QNVAYE…	0.391525	ALQSPALGLR; TCLDNLASK; ILAIGLINEALDEGDAQK; EQLWLANEGLITR; AQEIQDESAVLWLDEIQGGIWQSNK; TDPVDIYK; ATFYGEQVDYYK; ELATLQR; YLDELMK; TLQALQIPAAK; NPNAMLVNLEEPLASTYQDILYQAK; IFYPETTDIYDR; YQELINDIAR; LEGVLAEVAQHYQDTLIR; QLSSSVTGLTNIEEENCQR; GLQQQNSDWYLK; VDQIQEIVTGNPTVIK; EDSNLTLQEK; EEIQSSISGVTAAYNR; GVLLEIEDLQVNQFK; FALGIFAINEAVESGDVGK; LGLAPQIQDLYGK; NVIFEISPTEEVGDFEVK; HTDNVIQWLNAMDEIGLPK; TILLNTK; …
Overexpressed in colon carcinoma 1 protein	OCC1	Q8TAD7	OCC1	0.927336	DVTEESVTEDDKR	1.56774	DVTEESVTEDDKR
Luc7-like protein 3	LC7L3	O95232	LUC7L3	0.824938	IDVLLQQIEELGSEGK; YLQSLLAEVER	nd
Elongin-B	ELOB	Q15370	ELOB	1.05195	ESSTVFELK; TTIFTDAK; IVEGILK; LYKDDQLLDDGK	1.11247	ESSTVFELK; TTIFTDAK; IVEGILK; LYKDDQLLDDGK
Uracil nucleotide/cysteinyl leukotriene receptor	GPR17	Q13304	GPR17	NaN	HALCNLLCGK	nd
Procollagen-lysine,2-oxoglutarate 5-dioxygenase 2	PLOD2	O00469	PLOD2	nd		NaN	IIAPLVTR; SEDYVDIVQGNR
Vesicle-associated membrane protein-associated protein A	VAPA	Q9P0L0	VAPA	0.76277	HEQILVLDPPTDLK; EAKPDELMDSK; LQGEMMK	1.15012	HEQILVLDPPTDLK; VAHSDKPGSTSTASFR
Clathrin interactor 1	EPN4	Q14677	CLINT1	1.30144	ASPDQNASTHTPQSSVK; IGSTIDDTISK; YVGVSSDSVGGFR	1.33383	ASPDQNASTHTPQSSVK; YVGVSSDSVGGFR
Endoplasmic reticulum resident protein 29	ERP29	P30040	ERP29	nd		NaN	QGQDNLSSVK
Malonyl-CoA-acyl carrier protein transacylase, mitochondrial	FABD	Q8IVS2	MCAT	nd		NaN	VISGHQEALR
2',3'-cyclic-nucleotide 3'-phosphodiesterase	CN37	P09543	CNP	nd		NaN	DKPELQFPFLQDEDTVATLLECK
Coronin-1C	COR1C	Q9ULV4	CORO1C	0.93335	KQEIVAEK; SIKDTICNQDER; SDLFQDDLYPDTAGPEAALEAEEWFEGK; VGIVAWHPTAR; NDQCYDDIR; NADPILISLK; YFEITDESPYVHYLNTFSSK; KSDLFQDDLYPDTAGPEAALEAEEWFEGK; KCDLISIPK; TTDTASVQNEAK; VTWDSSFCAVNPR; QLALWNPK; CDLISIPK; NILDSKPTANK; NGSLICTASK	1.09166	SIKDTICNQDER; LDEILKEIK; SDLFQDDLYPDTAGPEAALEAEEWFEGK; VGIVAWHPTAR; NDQCYDDIR; TTDTASVQNEAKLDEILKEIK; AIFLADGNVFTTGFSR; NADPILISLK; YFEITDESPYVHYLNTFSSK; ISKLEQQMAK; KSDLFQDDLYPDTAGPEAALEAEEWFEGK; KCDLISIPK; TTDTASVQNEAK; VTWDSSFCAVNPR; QLALWNPK; CDLISIPK; NILDSKPTANK; NILDSKPTANKK; NGSLICTASK
Protein SET	SET	Q01105	SET	1.05506	LNEQASEEILK	0.981128	LNEQASEEILK
Coatomer subunit alpha	COPA	P53621	COPA	nd		1.51976	LLELGPKPEVAQQTR; VTTVTEIGK; QELILSNSEDK
Serine/arginine-rich splicing factor 4	SRSF4	Q08170	SRSF4	0.86512	LDGTEVNGR; NGYGFVEFDDLR	NaN	LDGTEVNGR; NGYGFVEFDDLR; ILEVDLK
Actin-related protein 2	ARP2	P61160	ACTR2	1.1805	GYAFNHSADFETVR; LCYVGYNIEQEQK; HLWDYTFGPEK; DLMVGDEASELR; VGNIEIK	1.00578	LCYVGYNIEQEQK; HLWDYTFGPEK; DLMVGDEASELR; GYAFNHSADFETVR; VGNIEIK; VVVCDNGTGFVK
NADH-cytochrome b5 reductase 3	NB5R3	P00387	CYB5R3	nd		NaN	STPAITLESPDIK
Alpha-centractin	ACTZ	P61163	ACTR1A	1.08153	ACYLSINPQKDETLETEK; DQLQTFSEEHPVLLTEAPLNPR	2.29577	ACYLSINPQKDETLETEK; DQLQTFSEEHPVLLTEAPLNPR
Spectrin alpha chain, non-erythrocytic 1	SPTN1	Q13813	SPTAN1	0.70738	ECEDVMDWINDK; ASAFNSWFENAEEDLTDPVR; IDGITIQAR; LIQEQHPEEELIK; QKLEDSYR; VNEVNQFAAK; AQLADSFHLQQFFR; LQTASDESYKDPTNIQSK; DVDEIEAWISEK; LIQSHPESAEDLQEK; QQNFNTGIK; LTVLSEER; LGDSHDLQR; ADVVESWIGEK; SSLSSAQADFNQLAELDR; DFDFWLSEVEALLASEDYGK; GNAMVEEGHFAAEDVK; DLIGVQNLLK; DLTGVQNLR; TATDEAYKDPSNLQGK; EELYQNLTR; KVEDLFLTFAK; QGFVPAAYVK; ELPTAFDYVEFTR; LFGAAEVQR; CTELNQAWSSLGK; LEESLEYQQFVANVEEEEAWINEK;…	0.77009	ECEDVMDWINDK; YTEHSTVGLAQQWDQLDQLGMR; ASAFNSWFENAEEDLTDPVR; IDGITIQAR; LIQEQHPEEELIK; QKLEDSYR; VNEVNQFAAK; GNAMVEEGHFAAEDVK; ITALDEFATK; LQTASDESYKDPTNIQSK; DVDEIEAWISEK; DVEDEETWIR; QQNFNTGIK; LTVLSEER; LGDSHDLQR; MTLVASEDYGDTLAAIQGLLK; IAALQAFADQLIAAGHYAK; ADVVESWIGEK; AQLADSFHLQQFFR; DLIGVQNLLK; DLTGVQNLR; GEIDAHEDSFK; TATDEAYKDPSNLQGK; EELYQNLTR; KVEDLFLTFAK; QETFDAGLQAFQQEGIANITALK; QGFVPAA…
Heterogeneous nuclear ribonucleoproteins A2/B1	ROA2	P22626	HNRNPA2B1	1.07274	QEMQEVQSSR; IDTIEIITDR; GFGFVTFDDHDPVDK; NYYEQWGK; LTDCVVMR; GFGDGYNGYGGGPGGGNFGGSPGYGGGR; TLETVPLER; LFIGGLSFETTEESLR; GGGGNFGPGPGSNFR; NMGGPYGGGNYGPGGSGGSGGYGGR; GGNFGFGDSR; YHTINGHNAEVR	1.50134	QEMQEVQSSR; IDTIEIITDR; GFGFVTFDDHDPVDK; NYYEQWGK; LTDCVVMR; GFGDGYNGYGGGPGGGNFGGSPGYGGGR; TLETVPLER; LFIGGLSFETTEESLR; GGGGNFGPGPGSNFR; GFGFVTFDDHDPVDKIVLQK; NMGGPYGGGNYGPGGSGGSGGYGGR; GGNFGFGDSR; YHTINGHNAEVR
Phosphoglycerate mutase 1	PGAM1	P18669	PGAM1	NaN	YADLTEDQLPSCESLK	1.65816	YADLTEDQLPSCESLK
CCR4-NOT transcription complex subunit 9	CNOT9	Q92600	CNOT9	NaN	NLQEGQVTDPR	NaN	NLQEGQVTDPR
ATP-dependent RNA helicase DDX1	DDX1	Q92499	DDX1	1.74133	DQLSVLENGVDIVVGTPGR; LDDLVSTGK; FLVLDEADGLLSQGYSDFINR; GHVDILAPTVQELAALEK	0.801862	LNLSQVR; DQLSVLENGVDIVVGTPGR; FLVLDEADGLLSQGYSDFINR; GHVDILAPTVQELAALEK
Dihydrolipoyllysine-residue succinyltransferase component of 2-oxoglutarate dehydrogenase complex, mitochondrial	ODO2	P36957	DLST	0.639752	AKPAEAPAAAAPK; EAVTFLR; NVEAMNFADIER; TITELGEK; DDLVTVK; GLVVPVIR; TPAFAESVTEGDVR; ASAFALQEQPVVNAVIDDTTK	0.800875	VEGGTPLFTLR; EAVTFLR; NVEAMNFADIER; TITELGEK; DDLVTVK; GLVVPVIR; TPAFAESVTEGDVR
Protocadherin beta-4	PCDB4	Q9Y5E5	PCDHB4	0.0491503	SARVLSDDDK	9.67131	SARVLSDDDK
tRNA (cytosine(34)-C(5))-methyltransferase	NSUN2	Q08J23	NSUN2	1.45746	LQQQQRPEDAEDGAEGGGK	nd
Protein-L-isoaspartate(D-aspartate) O-methyltransferase	PIMT	P22061	PCMT1	NaN	VQLVVGDGR	nd
Vitamin K epoxide reductase complex subunit 1	VKOR1	Q9BQB6	VKORC1	nd		0.826186	ALCDVGTAISCSR
Y-box-binding protein 3	YBOX3	P16989	YBX3	NaN	GAEAANVTGPDGVPVEGSR	nd
Zinc transporter SLC39A7	S39A7	Q92504	SLC39A7	nd		0.761563	DGPVRPQNAEEEKR
Vesicle-trafficking protein SEC22b	SC22B	O75396	SEC22B	0.751174	NLGSINTELQDVQR; DLQQYQSQAK	1.42455	NLGSINTELQDVQR; DLQQYQSQAK
ATP synthase F(0) complex subunit B1, mitochondrial	AT5F1	P24539	ATP5PB	1.22357	HVVQSISTQQEK	NaN	LAQLEEAK; HVVQSISTQQEK
Glyceraldehyde-3-phosphate dehydrogenase	G3P	P04406	GAPDH	1.30911	LISWYDNEFGYSNR; LVINGNPITIFQER; VPTANVSVVDLTCR; GALQNIIPASTGAAK; IISNASCTTNCLAPLAK	1.22462	WGDAGAEYVVESTGVFTTMEK; LVINGNPITIFQER; LISWYDNEFGYSNR; VPTANVSVVDLTCR; GALQNIIPASTGAAK; IISNASCTTNCLAPLAK
Arginine--tRNA ligase, cytoplasmic	SYRC	P54136	RARS	1.4344	LNDYIFSFDK; IYDALDVSLIER; SDGGYTYDTSDLAAIK	NaN	SDGGYTYDTSDLAAIK
Profilin-2	PROF2	P35080	PFN2	1.79316	SQGGEPTYNVAVGR	1.10888	SQGGEPTYNVAVGR
Serrate RNA effector molecule homolog	SRRT	Q9BXP5	SRRT	1.16024	EVAFFNNFLTDAK	1.09708	EVAFFNNFLTDAK
Protein S100-A16	S10AG	Q96FQ6	S100A16	1.20495	LIQNLDANHDGR	1.44669	LIQNLDANHDGR
Cleavage and polyadenylation specificity factor subunit 2	CPSF2	Q9P2I0	CPSF2	0.54838	DEQLLTNVLETLR	nd
U6 snRNA-associated Sm-like protein LSm2	LSM2	Q9Y333	LSM2	NaN	YVQLPADEVDTQLLQDAAR	nd
Zinc finger protein 185	ZN185	O15231	ZNF185	0.70311	QSSPSGSEQLVR; SEAASGVLR; SSAQLSDGNVGSGATGSRPEGLAAVDIGSER; SQDPPALAR; GSSSATSVSAVPADR; DLAGEEAFR	0.967515	GSSSATSVSAVPADR; SQDPPALAR; EHSYVLSAAK
Guanine nucleotide-binding protein G(I)/G(S)/G(O) subunit gamma-5	GBG5	P63218	GNG5	0.977376	LEAGLNR	nd
40S ribosomal protein S17	RS17	P08708	RPS17	0.916125	VCEEIAIIPSK; DNYVPEVSALDQEIIEVDPDTK; RDNYVPEVSALDQEIIEVDPDTK; VCEEIAIIPSKK	1.09172	VCEEIAIIPSK; DNYVPEVSALDQEIIEVDPDTK; IAGYVTHLMK; VCEEIAIIPSKK; RDNYVPEVSALDQEIIEVDPDTK
Inorganic pyrophosphatase 2, mitochondrial	IPYR2	Q9H2U2	PPA2	nd		NaN	AFALEVIK
Elongation factor 1-beta	EF1B	P24534	EEF1B2	1.2373	SPAGLQVLNDYLADK; ASLPGVK; SIQADGLVWGSSK; SSILLDVKPWDDETDMAK	1.19675	SPAGLQVLNDYLADK; ASLPGVK; SIQADGLVWGSSK; SSILLDVKPWDDETDMAK
Eukaryotic translation initiation factor 4 gamma 2	IF4G2	P78344	EIF4G2	NaN	EWLTELFQQSK	nd
Fibronectin	FINC	P02751	FN1	3.01277	WCGTTQNYDADQK; IGDQWDK; GFNCESKPEAEETCFDK; LGVRPSQGGEAPR; ITYGETGGNSPVQEFTVPGSK; AQITGYR; GLAFTDVDVDSIK; EESPLLIGQQSTVSDVPR; CDPHEATCYDDGK; VPGTSTSATLTGLTR; VDVIPVNLPGEHGQR; TFYSCTTEGR; GEWTCKPIAEK; QYNVGPSVSK; QDGHLWCSTTSNYEQDQK; DLQFVEVTDVK; ISCTIANR	0.85233	WCGTTQNYDADQK; HYQINQQWER; QYNVGPSVSK; LGVRPSQGGEAPR; GNLLQCICTGNGR; IAWESPQGQVSR; IGDTWSK; GLAFTDVDVDSIK; EESPLLIGQQSTVSDVPR; CDPHEATCYDDGK; TFYSCTTEGR; GFNCESKPEAEETCFDK; QDGHLWCSTTSNYEQDQK; DLQFVEVTDVK; ISCTIANR
Peroxiredoxin-1	PRDX1	Q06830	PRDX1	1.21689	LVQAFQFTDK; ATAVMPDGQFK; QGGLGPMNIPLVSDPK; HGEVCPAGWKPGSDTIKPDVQK; ADEGISFR; TIAQDYGVLK; IGHPAPNFK	1.28885	LVQAFQFTDK; ATAVMPDGQFK; QGGLGPMNIPLVSDPK; ADEGISFR; DISLSDYK; HGEVCPAGWKPGSDTIKPDVQK; TIAQDYGVLK; IGHPAPNFK
Isoform 3 of Spectrin alpha chain, non-erythrocytic 1	SPTN1	Q13813-3	SPTAN1	0.683826	QEQIDNQYHSLLELGEK	0.603414	QEQIDNQYHSLLELGEK
Serine/threonine-protein phosphatase 2A 65 kDa regulatory subunit A alpha isoform	2AAA	P30153	PPP2R1A	1.56633	ELVSDANQHVK; LAGGDWFTSR; YFAQEALTVLSLA; EFCENLSADCR; VLELDNVK; IGPILDNSTLQSEVKPILEK; AVGPEITK; LTQDQDVDVK	1.79784	VLELDNVK; MAGDPVANVR; LAGGDWFTSR; YFAQEALTVLSLA; VLAMSGDPNYLHR; LTQDQDVDVK; NLCSDDTPMVR; IGPILDNSTLQSEVKPILEK; AVGPEITK; EFCENLSADCR
Mitochondrial import inner membrane translocase subunit Tim13	TIM13	Q9Y5L4	TIMM13	1.01172	VQIAVANAQELLQR; LDPGLIMEQVK; CIGKPGGSLDNSEQK	1.00984	VQIAVANAQELLQR; LDPGLIMEQVK; CIGKPGGSLDNSEQK; YMDAWNTVSR
Cytochrome c oxidase subunit 5B, mitochondrial	COX5B	P10606	COX5B	0.367059	EDPNLVPSISNK; LVPQQLAH; GLDPYNVLAPK	0.486226	EDPNLVPSISNK; LVPQQLAH; KGLDPYNVLAPK; EIMLAAK; GLDPYNVLAPK
L-aminoadipate-semialdehyde dehydrogenase-phosphopantetheinyl transferase	ADPPT	Q9NRN7	AASDHPPT	NaN	HQDVPSQDDSKPTQR	NaN	HQDVPSQDDSKPTQR
Citrate synthase, mitochondrial	CISY	O75390	CS	1.02934	DILADLIPK	1.32749	DILADLIPK
Mapk-regulated corepressor-interacting protein 1	MCRI1	C9JLW8	MCRIP1	NaN	GLVEEYVEK	nd
Catenin beta-1	CTNB1	P35222	CTNNB1	1.0732	AGDREDITEPAICALR; HAVVNLINYQDDAELATR; AIPELTK; HQEAEMAQNAVR; LLNDEDQVVVNK; NEGVATYAAAVLFR; TMQNTNDVETAR; EAAEAIEAEGATAPLTELLHSR	0.96863	SPQMVSAIVR; AIPELTK; HQEAEMAQNAVR; LLNDEDQVVVNK; NEGVATYAAAVLFR; ATVGLIR; EAAEAIEAEGATAPLTELLHSR
Catenin alpha-1	CTNA1	P35221	CTNNA1	1.09302	LLSNTVMPR; AHVLAASVEQATENFLEK; IAEQVASFQEEK; LAQENMDLFK; CVIALQEK; LIEVANLACSISNNEEGVK; SDALNSAIDK; ESQFLKEELVAAVEDVR; VLTDAVDDITSIDDFLAVSENHILEDVNK; NAGNEQDLGIQYK; LNIMAAK; VIHVVTSEMDNYEPGVYTEK; LLILADMADVYK; VVEDGILK; AAAGEFADDPCSSVK; TIADHCPDSACK	1.57533	LLSNTVMPR; NTSDVISAAK; QALQDLLSEYMGNAGR; AHVLAASVEQATENFLEK; IAEQVASFQEEK; AEVQNLGGELVVSGVDSAMSLIQAAK; LNIMAAK; SDALNSAIDK; LIEVANLACSISNNEEGVK; VLTDAVDDITSIDDFLAVSENHILEDVNK; NAGNEQDLGIQYK; VIHVVTSEMDNYEPGVYTEK; LLILADMADVYK; AVMDHVSDSFLETNVPLLVLIEAAK; VVEDGILK; AAAGEFADDPCSSVK; LLEPLVTQVTTLVNTNSK; TIADHCPDSACK
FERM, ARHGEF and pleckstrin domain-containing protein 1	FARP1	Q9Y4F1	FARP1	0.680668	LGAPENSGISTLER; DLIGIDNLVVPGR	NaN	DLIGIDNLVVPGR
Phostensin	PPR18	Q6NYC8	PPP1R18	0.851806	LSPGETPER; QDYSEECGR; SEELLAER; ESQEQSLVQLEATEWR; LGLSPGEPSPVLGTVEAGPPDPDESAVLLEAIGPVHQNR; EAQGNSSAGVEAAEQRPVEDGER	0.959919	LSPGETPER; QDYSEECGR; SEELLAER; ESQEQSLVQLEATEWR; ETAELSETLTR; LSPGESAYQK; EAQGNSSAGVEAAEQRPVEDGER; ALIVDESCR; LSQMPAWK
Insulin-like growth factor 2 mRNA-binding protein 1	IF2B1	Q9NZI8	IGF2BP1	0.901306	FASASIK; AISVHSTPEGCSSACK; LYIGNLNESVTPADLEK; QQQVDIPLR; LKEENFFGPK; DQTPDENDQVIVK	0.970693	ITISSLQDLTLYNPER; AISVHSTPEGCSSACK; LYIGNLNESVTPADLEK; TVNELQNLTAAEVVVPR; QQQVDIPLR; LKEENFFGPK; TADEVPLK; DQTPDENDQVIVK; AIETFSGK
Cytochrome c oxidase subunit 8A, mitochondrial	COX8A	P10176	COX8A	0.15745	IHSLPPEGK	0.353989	IHSLPPEGK
5'-AMP-activated protein kinase subunit gamma-2	AAKG2	Q9UGJ0	PRKAG2	NaN	KNASQKR	nd
4F2 cell-surface antigen heavy chain	4F2	P08195	SLC3A2	0.776966	GQSEDPGSLLSLFR; EDFDSLLQSAK; DDVAQTDLLQIDPNFGSK	nd
Stress-70 protein, mitochondrial	GRP75	P38646	HSPA9	1.49674	RYDDPEVQK; QAASSLQQASLK; TTPSVVAFTADGER; DDIENMVK; SQVFSTAADGQTQVEIK; VINEPTAAALAYGLDK; VLENAEGAR; ETAENYLGHTAK; DAGQISGLNVLR; VEAVNMAEGIIHDTETK; STNGDTFLGGEDFDQALLR; NAVITVPAYFNDSQR; SDIGEVILVGGMTR; QAVTNPNNTFYATK; DQLPADECNK; LFEMAYK; ASNGDAWVEAHGK; MEEFKDQLPADECNK; VQQTVQDLFGR; EQQIVIQSSGGLSK; AQFEGIVTDLIR	1.88436	RYDDPEVQK; QAASSLQQASLK; VQQTVQDLFGR; DDIENMVK; VINEPTAAALAYGLDK; VLENAEGAR; DAGQISGLNVLR; ETAENYLGHTAK; STNGDTFLGGEDFDQALLR; LVGMPAK; SDIGEVILVGGMTR; QAVTNPNNTFYATK; DQLPADECNK; NAVITVPAYFNDSQR; LFEMAYK; TTPSVVAFTADGER; EQQIVIQSSGGLSK; AQFEGIVTDLIR; VEAVNMAEGIIHDTETK
Ras-related protein R-Ras2	RRAS2	P62070	RRAS2	1.39972	QVTQEEGQQLAR	NaN	QVTQEEGQQLAR
Influenza virus NS1A-binding protein	NS1BP	Q9Y6Y0	IVNS1ABP	1.34047	NCDVFDPVTK; LYIVGGSDPYGQK	1.45972	LYIVGGSDPYGQK; FDDLNPEAVEVLLNYAYTAQLK; QVCGDYLLSR; SGQFCDVR; VDAYIQEHLLQISEEEEFLK; VINWVQR
Mitochondrial import receptor subunit TOM7 homolog	TOM7	Q9P0U1	TOMM7	NaN	GADPGMPEPTVLSLLWG	NaN	GSQFAIR; GADPGMPEPTVLSLLWG
40S ribosomal protein S4, X isoform	RS4X	P62701	RPS4X	1.02921	LSNIFVIGK; FDTGNLCMVTGGANLGR; VNDTIQIDLETGK; TDITYPAGFMDVISIDK; ECLPLIIFLR; IGVITNR	1.01731	LSNIFVIGK; FDTGNLCMVTGGANLGR; VNDTIQIDLETGK; TDITYPAGFMDVISIDK; ECLPLIIFLR; IGVITNR
Elongation factor 1-delta	EF1D	P29692	EEF1D	0.980141	GVVQELQQAISK; IASLEVENQSLR; SIQLDGLVWGASK; SLAGSSGPGASSGTSGDHGELVVR	0.9822	IASLEVENQSLR; GVVQELQQAISK; ATAPQTQHVSPMR; SIQLDGLVWGASK; SLAGSSGPGASSGTSGDHGELVVR; FYEQMNGPVAGASR
Elongation factor Tu, mitochondrial	EFTU	P49411	TUFM	0.786457	AEAGDNLGALVR; ELLTEFGYK; GEETPVIVGSALCALEGR	1.47302	AEAGDNLGALVR; ELLTEFGYK; GEETPVIVGSALCALEGR
MOB-like protein phocein	PHOCN	Q9Y3A3	MOB4	2.66111	VMAEGTAVLR; HTLDGAACLLNSNK; ECPAIDYTR; QFCLELNGLAVK; ILEPPEGQDEGVWK	3.63855	HTLDGAACLLNSNK; ECPAIDYTR; QIFDEYENETFLCHR; ILEPPEGQDEGVWK; VMAEGTAVLR; DNLIVPILEEEVQNSVSGESEA
Scaffold attachment factor B1	SAFB1	Q15424	SAFB	0.535257	AIEDEGGNPDEIEITSEGNKK	0.875115	NFWVSGLSSTTR; AIEDEGGNPDEIEITSEGNKK
Splicing factor 3B subunit 4	SF3B4	Q15427	SF3B4	0.682672	NQDATVYVGGLDEK	0.959861	NQDATVYVGGLDEK
Replication protein A 70 kDa DNA-binding subunit	RFA1	P27694	RPA1	0.90579	ATAFNEQVDK; DKNEQAFEEVFQNANFR	1.0433	ATAFNEQVDK; DSLVDIIGICK; FIVNTLK; DKNEQAFEEVFQNANFR
DNA-(apurinic or apyrimidinic site) lyase	APEX1	P27695	APEX1	nd		0.650755	EGYSGVGLLSR; ICSWNVDGLR; VSYGIGDEEHDQEGR
40S ribosomal protein S13	RS13	P62277	RPS13	1.03728	LILIESR; GLAPDLPEDLYHLIK	0.976578	LILIESR; GLAPDLPEDLYHLIK
Far upstream element-binding protein 1	FUBP1	Q96AE4	FUBP1	nd		1.10013	RPLEDGDQPDAK; IQIAPDSGGLPER
Dermcidin	DCD	P81605	DCD	0.0747369	ENAGEDPGLAR	3.78473	ENAGEDPGLAR
Uncharacterized protein C7orf50	CG050	Q9BRJ6	C7orf50	0.954227	SGAELALDYLCR; GEAVLRPGLDAEPELSPEEQR; QVLQLLS; ASAEGPLLGPEAAPSGEGAGSK	1.30381	SGAELALDYLCR; GEAVLRPGLDAEPELSPEEQR
Golgin subfamily A member 3	GOGA3	Q08378	GOLGA3	NaN	EQFLQQK	9.04308	EQFLQQK
ATP synthase subunit d, mitochondrial	ATP5H	O75947	ATP5PD	NaN	SWNETLTSR	0.706472	SWNETLTSR
Eukaryotic initiation factor 4A-I	IF4A1	P60842	EIF4A1	1.06092	KEELTLEGIR; DQIYDIFQK	1.08459	EELTLEGIR; ATQALVLAPTR; KEELTLEGIR; DQIYDIFQK
Ras-related protein Rab-7a	RAB7A	P51149	RAB7A	nd		NaN	EAINVEQAFQTIAR
Protein transport protein Sec31A	SC31A	O94979	SEC31A	NaN	TTFEDLIQR	nd
WD repeat-containing protein 1	WDR1	O75083	WDR1	2.13162	YEYQPFAGK; AHDGGIYAISWSPDSTHLLSASGDK; FATASADGQIYIYDGK; VFASLPQVER; NIDNPALADIYTEHAHQVVVAK; SIQCLTVHK; FTIGDHSR; DIAWTEDSKR; GPVTDVAYSHDGAFLAVCDASK; VINSVDIK; LYSILGTTLK; LATGSDDNCAAFFEGPPFK; YAPSGFYIASGDVSGK; IWDTTQK; LYSILGTTLKDEGK; DIAWTEDSK; SYIYSGSHDGHINYWDSETGENDSFAGK	1.83444	YEYQPFAGK; AHDGGIYAISWSPDSTHLLSASGDK; FATASADGQIYIYDGK; YTSLMLR; VFASLPQVER; MTVDESGQLISCSMDDTVR; NIDNPALADIYTEHAHQVVVAK; SIQCLTVHK; FTIGDHSR; DIAWTEDSKR; GPVTDVAYSHDGAFLAVCDASK; CFSIDNPGYEPEVVAVHPGGDTVAIGGVDGNVR; VINSVDIK; IAVVGEGR; LYSILGTTLK; LATGSDDNCAAFFEGPPFK; YAPSGFYIASGDVSGK; IWDTTQK; LYSILGTTLKDEGK; SYIYSGSHDGHINYWDSETGENDSFAGK
182 kDa tankyrase-1-binding protein	TB182	Q9C0C2	TNKS1BP1	1.96091	DLEVTCDPDSGGSQGLR; FAATTVEEILAK; TEAQDLCR; DVSLGDWEFGK; DLAEVGEGGGHSQAR; LTFNHDGSSR	0.183716	DQSSWQNSDASQEVGGHQER; SYQFGIIGNDR; LTFNHDGSSR; VSAPGVLTAQDR; DAELQDQEFGK
26S proteasome non-ATPase regulatory subunit 12	PSD12	O00232	PSMD12	NaN	LQEVIETLLSLEK	NaN	LQEVIETLLSLEK
Histone-binding protein RBBP4	RBBP4	Q09028	RBBP4	1.73789	GEFGGFGSVSGK	NaN	GEFGGFGSVSGK
AP-2 complex subunit alpha-2	AP2A2	O94973	AP2A2	1.17477	QLSNPQQEVQNIFK; TVFEALQAPACHENLVK; TTQIGCLLR; LCELLSAQF; LTECLETILNK	0.74042	TVFEALQAPACHENLVK; LSTVASTDILATVLEEMPPFPER; TTQIGCLLR; FVNLFPEVKPTIQDVLR; QLSNPQQEVQNIFK; GPSTVTDLEDTKR
Cytoskeleton-associated protein 4	CKAP4	Q07065	CKAP4	0.939472	LALQALTEK; LSSLDNLK; VQEQVHTLLSQDQAQAAR; HSEAFEALQQK; LQNEILK; GLLDDLR; VASLEESEGNKQDLK; ASVSQVEADLK; IETNENNLESAK; SINDNIAIFTEVQK; QTESLESLLSK; LEGLGSSEADQDGLASTVR	1.39411	LALQALTEK; SVGELPSTVESLQK; LSSLDNLK; VQEQVHTLLSQDQAQAAR; VASLEESEGNKQDLK; GLLDDLR; HSEAFEALQQK; ASVSQVEADLK; IETNENNLESAK; LEGLGSSEADQDGLASTVR; STLQTMESDIYTEVR; QTESLESLLSK; VQSLQATFGTFESILR; SLGETQLVLYGDVEELKR
Signal recognition particle 14 kDa protein	SRP14	P37108	SRP14	1.26183	VLLESEQFLTELTR; KGTVEGFEPADNK	1.12143	VLLESEQFLTELTR; KGTVEGFEPADNK
RNA-binding protein 10	RBM10	P98175	RBM10	0.763258	LDQQTLPLGGR	1.31897	LDQQTLPLGGR
Alpha-enolase	ENOA	P06733	ENO1	1.26174	EGLELLK; SCNCLLLK; GNPTVEVDLFTSK; IEEELGSK; DATNVGDEGGFAPNILENK; YISPDQLADLYK; DYPVVSIEDPFDQDDWGAWQK	1.51221	EGLELLK; SCNCLLLK; LMIEMDGTENK; IGAEVYHNLK; GNPTVEVDLFTSK; IEEELGSK; TIAPALVSK; DATNVGDEGGFAPNILENK; YISPDQLADLYK; DYPVVSIEDPFDQDDWGAWQK
Eukaryotic translation initiation factor 4E	IF4E	P06730	EIF4E	1.02679	IAIWTTECENR; WLITLNK	0.605368	WLITLNK; IAIWTTECENR
Serine/threonine-protein phosphatase 2A 65 kDa regulatory subunit A beta isoform	2AAB	P30154	PPP2R1B	0.979605	SEIVPLFTSLASDEQDSVR	NaN	YFAQEAISVLALA
Trifunctional enzyme subunit beta, mitochondrial	ECHB	P55084	HADHB	0.900253	EAALGAGFSDK; EVVDYIIFGTVIQEVK; DQLLLGPTYATPK; VGLPPLEK	1.29011	KAQDEGLLSDVVPFK; EAALGAGFSDK; EVVDYIIFGTVIQEVK; AALTGLLHR; TPFLLSGTSYK; DQLLLGPTYATPK; LVMAAANR; AQDEGLLSDVVPFK
Ribosomal L1 domain-containing protein 1	RL1D1	O76021	RSL1D1	0.947456	EINDCIGGTVLNISK	NaN	SAALPIFSSFVSNWDEATK; EINDCIGGTVLNISK
Developmentally-regulated GTP-binding protein 2	DRG2	P55039	DRG2	NaN	YRAQLLEPSK	18.0347	YRAQLLEPSK
Protein SEC13 homolog	SEC13	P55735	SEC13	1.02331	ESVDGQWVCISDVNK; DVAWAPSIGLPTSTIASCSQDGR	nd
Uncharacterized protein C16orf96	CP096	A6NNT2	C16orf96	NaN	VNKSTMEEELR	nd
CD151 antigen	CD151	P48509	CD151	nd		0.7472	TVVALCGQR
Hepatocyte growth factor-regulated tyrosine kinase substrate	HGS	O14964	HGS	nd		0.946975	NCGQTVHDEVANK
Integrin beta-1	ITB1	P05556	ITGB1	1.03771	WDTGENPIYK; DNTNEIYSGK; GEVFNELVGK; NVLSLTNK; LSENNIQTIFAVTEEFQPVYK; IGFGSFVEK	2.23775	LSENNIQTIFAVTEEFQPVYK; WDTGENPIYK; GEVFNELVGK; NVLSLTNK; IGFGSFVEK
Regulator of G-protein signaling 17	RGS17	Q9UGC6	RGS17	NaN	TEYSEENLLFWLACEDLK	nd
Spectrin beta chain, non-erythrocytic 1	SPTB2	Q01082	SPTBN1	0.771981	NEIDNYEEDYQK; LSGIEER; GEQVSQNGLPAEQGSPR; TQTAIASEDMPNTLTEAEK; EAVCEVALDYK; VLVLSQDYGK; LLTQHENIK; DALLSALSIQNYHLECNETK; QLWGLLIEETEK; FESLEPEMNNQASR; LVSQDNFGFDLPAVEAATK; WLHGLESQIQSDDYGK; LTTLELLEVR; SGHFEQAIK; AKDEQSAVSMLK; DVEDEILWVGER; LVSDGNINSDR; EIEELQSQAQALSQEGK; DDEEMNTWIQAISSAISSDK; LQAAYAGDK; QLWGLLIEETEKR; AQTLPTSVVTITSESSPGK; TAASGIPYHSEVPVSLK; DQNTVETLQR; DVSSVELLMNNHQGIK; VIESTQDL…	0.837065	KHEAIETDIAAYEER; LSGIEER; MLTAQDMSYDEAR; TQTAIASEDMPNTLTEAEK; EAVCEVALDYK; VLVLSQDYGK; LLTQHENIK; NEIDNYEEDYQK; QLWGLLIEETEK; FESLEPEMNNQASR; DEQSAVSMLK; LTTLELLEVR; SGHFEQAIK; AKDEQSAVSMLK; DVEDEILWVGER; LVSDGNINSDR; EIEELQSQAQALSQEGK; DDEEMNTWIQAISSAISSDK; ALVADSHPESER; QLWGLLIEETEKR; AQTLPTSVVTITSESSPGK; TAASGIPYHSEVPVSLK; EVVAGSHELGQDYEHVTMLQER; DQNTVETLQR; DVSSVELLMNNHQGIK; VIESTQDLGNDLAGVMA…
Cellular nucleic acid-binding protein	CNBP	P62633	CNBP	1.04462	CGETGHVAINCSK; GFQFVSSSLPDICYR	1.05026	CGETGHVAINCSK; GFQFVSSSLPDICYR
PDZ and LIM domain protein 7	PDLI7	Q9NR12	PDLIM7	1.4346	GAIFCPPCYDVR; VLEEGGFFEEK; DFNVPLSISR; ASAPAADPPR	1.51043	GAIFCPPCYDVR; VLEEGGFFEEK; DFNVPLSISR; LSLGLSR; ASAPAADPPR
Arfaptin-1	ARFP1	P53367	ARFIP1	4.0107	TIEDTLMTVK	nd
Heterogeneous nuclear ribonucleoprotein M	HNRPM	P52272	HNRNPM	0.862245	ADILEDKDGK; AFITNIPFDVK; DKFNECGHVLYADIK; VGEVTYVELLMDAEGK; MGLVMDR; MGPLGLDHMASSIER; MGPAIER; MGPGIDR; QGGGGGGGSVPGIER; NLPFDFTWK; MGANNLER; GCAVVEFK; INEILSNALK; MGANSLER	0.928989	ADILEDKDGK; AFITNIPFDVK; DKFNECGHVLYADIK; QGGGGGGGSVPGIER; MGPLGLDHMASSIER; MGPAIER; MGPGIDR; VGEVTYVELLMDAEGK; FESPEVAER; NLPFDFTWK; MGANNLER; GCAVVEFK; INEILSNALK; MGANSLER
High mobility group protein HMG-I/HMG-Y	HMGA1	P17096	HMGA1	0.612385	KLEKEEEEGISQESSEEEQ	1.44129	EPSEVPTPK; KLEKEEEEGISQESSEEEQ
40S ribosomal protein S10	RS10	P46783	RPS10	NaN	IAIYELLFK	NaN	IAIYELLFK
40S ribosomal protein S5	RS5	P46782	RPS5	1.00127	QAVDVSPLR; AQCPIVER; TIAECLADELINAAK	0.959688	QAVDVSPLR; WSTDDVQINDISLQDYIAVK; AQCPIVER; TIAECLADELINAAK
40S ribosomal protein S9	RS9	P46781	RPS9	0.994603	ELLTLDEKDPR; QVVNIPSFIVR; LQTQVFK; IGVLDEGK; IEDFLER; LIGEYGLR; LDYILGLK; ELLTLDEK; LFEGNALLR; HIDFSLR	1.04279	ELLTLDEKDPR; QVVNIPSFIVR; LQTQVFK; IGVLDEGK; LIGEYGLR; LDYILGLK; LFEGNALLR
60S ribosomal protein L13	RL13	P26373	RPL13	1.06655	GFSLEELR; TIGISVDPR; STESLQANVQR	1.22798	GFSLEELR; LATQLTGPVMPVR; VATWFNQPAR; STESLQANVQR
POTE ankyrin domain family member J	POTEJ	P0CG39	POTEJ	2.26436	LCYVALDFEQEMAMVASSSSLEK	nd
Fibrous sheath-interacting protein 2	FSIP2	Q5CZC0	FSIP2	8.45077	AVASDILNMVFAK	nd
Nuclear pore glycoprotein p62	NUP62	P37198	NUP62	nd		0.81494	ELEDLLSPLEELVK
Leucine-rich PPR motif-containing protein, mitochondrial	LPPRC	P42704	LRPPRC	1.07043	VIEEQLEPAVEK; AFAETHIK; SVLELIPELNEK; GDLSTALEVAIDCYEK; ISIMAER; NLLESYHVPELIK; DAHLLVESK; SEAANGNLDFVLSFLK; GDVENIEVVQK; GAYDIFLNAK; LDSSAVLDTGK; HSLNSSSASTTEPDFQK; GETDLIQK; LQWFCDR; VYLQNEYK; DAGIEPGPDTYLALLNAYAEK; KVIEEQLEPAVEK; SELHLMDR; YAGEPVPFIEPPESFEFYAQQLR; LIITQVR; LQDAINILK; SSLLLGFR; LLAEILR; NVQGIIEILK; NNNIDAAIENIENMLTSENK; FSPTDFLAK; EGNQEVPFDVPELWYEDEK; IHDVLCK; TVQLTSSELESTLETLK…	0.773195	VIEEQLEPAVEK; AFAETHIK; SVLELIPELNEK; ISNQFDWALMR; GDLSTALEVAIDCYEK; ISIMAER; LVELTQK; SEAANGNLDFVLSFLK; GDVENIEVVQK; MLNGLEDSIGLSK; GAYDIFLNAK; LDSSAVLDTGK; HSLNSSSASTTEPDFQK; GETDLIQK; NLLESYHVPELIK; IQEENVIPR; LFECDRDQMYYNLLK; DAGIEPGPDTYLALLNAYAEK; KVIEEQLEPAVEK; SELHLMDR; YAGEPVPFIEPPESFEFYAQQLR; LQWFCDR; LQDAINILK; SSLLLGFR; LLAEILR; NVQGIIEILK; NNNIDAAIENIENMLTSENK; DLPVTEAVFSALVTGHAR; SNT…
Niban-like protein 1	NIBL1	Q96TA1	FAM129B	NaN	FQELIFEDFAR	NaN	FQELIFEDFAR
Urokinase-type plasminogen activator	UROK	P00749	PLAU	1.35026	FEVENLILHK; SDALQLGLGK	1.60561	FEVENLILHK; SDALQLGLGK
Coagulation factor V	FA5	P12259	F5	0.118583	EVIITGIQTQGAK	7.09232	EVIITGIQTQGAK
Target of Myb protein 1	TOM1	O60784	TOM1	0.768747	SSPDLTGVVTIYEDLR; VLNLIQSWADAFR; ATDGSLQSEDWALNMEICDIINETEEGPK; YEAPQATDGLAGALDAR; AGLQSLEASGR; GVTSEEFDK	1.05455	VLNLIQSWADAFR; GVTSEEFDK; YEAPQATDGLAGALDAR; LEDEFDMFALTR; AGLQSLEASGR
Succinate dehydrogenase [ubiquinone] flavoprotein subunit, mitochondrial	SDHA	P31040	SDHA	NaN	GEGGILINSQGER	NaN	GEGGILINSQGER
RNA-binding protein Musashi homolog 2	MSI2H	Q96DH6	MSI2	NaN	GFGFVTFADPASVDK	nd
Actin-related protein 2/3 complex subunit 4	ARPC4	P59998	ARPC4	0.818974	VLIEGSINSVR; ELLLQPVTISR; IVAEEFLK; AENFFILR	1.02207	VLIEGSINSVR; ELLLQPVTISR; IVAEEFLK; AENFFILR
Peroxisomal multifunctional enzyme type 2	DHB4	P51659	HSD17B4	1.32538	IDSEGGVSANHTSR	1.87713	IDSEGGVSANHTSR; AVANYDSVEEGEK; ISDEDWDIIHR; GALVVVNDLGGDFK
Peptidyl-prolyl cis-trans isomerase FKBP1A	FKB1A	P62942	FKBP1A	nd		NaN	GVQVETISPGDGR
Sec1 family domain-containing protein 1	SCFD1	Q8WVM8	SCFD1	NaN	SLLDIISDPDAGTPEDK	nd
Far upstream element-binding protein 3	FUBP3	Q96I24	FUBP3	nd		0.545049	IQFKPDDGISPER
Calpain small subunit 1	CPNS1	P04632	CAPNS1	NaN	TDGFGIDTCR	0.933939	TDGFGIDTCR
Isoform Non-brain of Clathrin light chain B	CLCB	P09497-2	CLTB	1.93291	ASEEAFVK	NaN	ASEEAFVK
2-oxoglutarate dehydrogenase, mitochondrial	ODO1	Q02218	OGDH	0.659959	THLTELQR; ELEQIFCQFDSK; YAELLVSQGVVNQPEYEEEISK; ICEEAFAR; LLDTAFDLDVFK; FGLEGCEVLIPALK	0.947517	NQGYYDYVKPR; ELEQIFCQFDSK; IEQLSPFPFDLLLK; ICEEAFAR; FEEFLQR; LLDTAFDLDVFK; FGLEGCEVLIPALK
Transferrin receptor protein 1	TFR1	P02786	TFRC	0.838435	GFVEPDHYVVVGAQR; QVDGDNSHVEMK; LLNENSYVPR; LTTDFGNAEK; LAVDEEENADNNTK; DENLALYVENQFR; DSAQNSVIIVDK	0.973341	GFVEPDHYVVVGAQR; ILNIFGVIK; QVDGDNSHVEMK; LLNENSYVPR; SSGLPNIPVQTISR; LTTDFGNAEK; LAVDEEENADNNTK; AVLGTSNFK; DENLALYVENQFR; LTVSNVLK
V-type proton ATPase subunit F	VATF	Q16864	ATP6V1F	0.874539	DTTINEIEDTFR	nd
Lamin-B1	LMNB1	P20700	LMNB1	0.776973	ALYETELADAR; IQELEDLLAK	2.28626	ALYETELADAR; NQNSWGTGEDVK; LAVYIDK
Eukaryotic translation initiation factor 3 subunit B	EIF3B	P55884	EIF3B	1.41142	FAVLHGEAPR; VNLFTDFDK; AQAVSEDAGGNEGR; GIALWGGEK; ITNDFYPEEDGK	NaN	NLFNVVDCK; VNLFTDFDK; FAVLHGEAPR; GIALWGGEK
Golgi-associated plant pathogenesis-related protein 1	GAPR1	Q9H4G4	GLIPR2	0.774408	EAQQYSEALASTR; ASASDGSSFVVAR	0.830767	EAQQYSEALASTR; ASASDGSSFVVAR
Isoform 4 of Inhibitor of nuclear factor kappa-B kinase-interacting protein	IKIP	Q70UQ0-4	IKBIP	NaN	VEEQLGSDTK	NaN	VEEQLGSDTK
Ras-related protein Rab-10	RAB10	P61026	RAB10	nd		NaN	NIDEHANEDVER
Chromobox protein homolog 3	CBX3	Q13185	CBX3	1.06606	GFTDADNTWEPEENLDCPELIEAFLNSQK; WKDSDEADLVLAK; LTWHSCPEDEAQ	nd
Fumarate hydratase, mitochondrial	FUMH	P07954	FH	nd		NaN	ETAIELGYLTAEQFDEWVKPK
Filaggrin-2	FILA2	Q5D862	FLG2	NaN	FSNSSSSNEFSK	NaN	FSNSSSSNEFSK
Microtubule-associated protein 1B	MAP1B	P46821	MAP1B	1.24597	SWDTNLIECNLDQELK; DIKPQLELIEDEEK; TSDVGGYYYEK	1.12768	NLISPDLGVVFLNVPENLK; TPDTSTYCYETAEK; DIKPQLELIEDEEK; TSDVGGYYYEK
Sciellin	SCEL	O95171	SCEL	nd		NaN	NQGLDSLFR
Disks large homolog 1	DLG1	Q12959	DLG1	NaN	IITGGAAAQDGR	NaN	IITGGAAAQDGR
High mobility group protein B1	HMGB1	P09429	HMGB1	nd		NaN	KHPDASVNFSEFSK
glucosyltransferase 1	UGGG1	Q9NYU2	UGGT1	0.658769	IYSHDGTDSPPDADEVVIVLNNFK; VDALLSAQPK; QLLYDAIK	1.46209	IYSHDGTDSPPDADEVVIVLNNFK; IIGPLEDSELFNQDDFHLLENIILK; VDALLSAQPK; QLLYDAIK
Splicing factor 3A subunit 1	SF3A1	Q15459	SF3A1	0.987917	TDIFGVEETAIGK; EPPPEFEFIADPPSISAFDLDVVK	NaN	LQYEGIFIK
Cytoskeleton-associated protein 5	CKAP5	Q14008	CKAP5	NaN	IEDLEEGQQVIR; VNDFLAEIFK	NaN	IEDLEEGQQVIR; VNDFLAEIFK
Peptide-N(4)-(N-acetyl-beta-glucosaminyl)asparagine amidase	NGLY1	Q96IV0	NGLY1	0.106556	DLIAIERSSR	5.89339	DLIAIERSSR
Proteasome subunit alpha type-3	PSA3	P25788	PSMA3	nd		NaN	AVENSSTAIGIR
Ras-related protein Rab-8A	RAB8A	P61006	RAB8A	NaN	TIELDGKR	NaN	TIELDGKR
Eukaryotic translation initiation factor 4E type 2	IF4E2	O60573	EIF4E2	nd		1.36399	FQEDIISIWNK
Profilin-1	PROF1	P07737	PFN1	1.38173	STGGAPTFNVTVTK; DSPSVWAAVPGK; EGVHGGLINK	1.1988	STGGAPTFNVTVTK; DSPSVWAAVPGK; CYEMASHLR; EGVHGGLINK; TFVNITPAEVGVLVGK; TLVLLMGK; DSLLQDGEFSMDLR
40S ribosomal protein S25	RS25	P62851	RPS25	1.00841	AALQELLSK; LITPAVVSER; AQVIYTR; DKLNNLVLFDK; LNNLVLFDK	1.00572	AALQELLSK; LITPAVVSER; AQVIYTR; DKLNNLVLFDK; LNNLVLFDK
Mitochondrial carrier homolog 2	MTCH2	Q9Y6C9	MTCH2	nd		0.362834	VLQHYQESDKGEELGPGNVQK; GLFTGLTPR; GNSLFFR
Pentraxin-related protein PTX3	PTX3	P26022	PTX3	NaN	ALAAVLEELR	nd
Striated muscle preferentially expressed protein kinase	SPEG	Q15772	SPEG	0.713781	GALLEAR	0.702835	GALLEAR
40S ribosomal protein S26	RS26	P62854	RPS26	1.15714	DISEASVFDAYVLPK	1.40472	DISEASVFDAYVLPK
40S ribosomal protein S28	RS28	P62857	RPS28	1.23197	VEFMDDTSR; EGDVLTLLESER	1.02207	VEFMDDTSR; EGDVLTLLESER
Septin-11	SEP11	Q9NVA2	SEPT11	NaN	AAAQLLQSQAQQSGAQQTK	nd
Proteasome subunit alpha type-5	PSA5	P28066	PSMA5	nd		NaN	AIGSASEGAQSSLQEVYHK
mRNA export factor	RAE1L	P78406	RAE1	nd		NaN	NAAEELKPR
Heterogeneous nuclear ribonucleoprotein F	HNRPF	P52597	HNRNPF	0.956374	HSGPNSADSANDGFVR; SYSDPPLK; ITGEAFVQFASQELAEK; QSGEAFVELGSEDDVK; TEMDWVLK	0.987665	HSGPNSADSANDGFVR; QSGEAFVELGSEDDVK; ITGEAFVQFASQELAEK; DLSYCLSGMYDHR; EEIVQFFSGLEIVPNGITLPVDPEGK
Coiled-coil domain-containing protein 96	CCD96	Q2M329	CCDC96	NaN	LQEQQLR	0.814022	LQEQQLR
Peptidyl-prolyl cis-trans isomerase H	PPIH	O43447	PPIH	NaN	IELFADVVPK	nd
Calpain-2 catalytic subunit	CAN2	P17655	CAPN2	1.10553	FADDQLIIDFDNFVR	1.01921	FADDQLIIDFDNFVR
Cytochrome c oxidase subunit 5A, mitochondrial	COX5A	P20674	COX5A	0.416575	LNDFASTVR; IIDAALR	0.469155	GINTLVTYDMVPEPK; LNDFASTVR
Reticulon-4	RTN4	Q9NQC3	RTN4	NaN	GPLPAAPPVAPER	1.50773	YSNSALGHVNCTIK; GPLPAAPPVAPER; GVIQAIQK
Importin subunit alpha-1	IMA1	P52292	KPNA2	1.22717	ASLSLIEK; TGVVPQLVK; GINSSNVENQLQATQAAR	5.34229	GINSSNVENQLQATQAAR; ASLSLIEK; NPAPPIDAVEQILPTLVR; FVSFLGR; LLGASELPIVTPALR
60S ribosomal protein L32	RL32	P62910	RPL32	1.07339	ELEVLLMCNK; SYCAEIAHNVSSK	1.07685	ELEVLLMCNK; SYCAEIAHNVSSK
Glutathione S-transferase P	GSTP1	P09211	GSTP1	nd		1.91	FQDGDLTLYQSNTILR; DQQEAALVDMVNDGVEDLR
Rho guanine nucleotide exchange factor 1	ARHG1	Q92888	ARHGEF1	nd		NaN	AEVDAEKPGATDR
Plectin	PLEC	Q15149	PLEC	0.57354	LLEAAAQSTK; AYSDPSTGEPATYGELQQR; AQAEAQQPTFDALR; LEDLLQDAQDEKEQLNEYK; FLEVQYLTGGLIEPDTPGR; TVTIWEIINSEYFTAEQR; GLVGPELHDR; LQLEACETR; KQEELQQLEQQR; AQLEPVASPAK; WQAVLAQTDVR; NLVDNITGQR; SIQEELQQLR; AALAHSEEVTASQVAATK; LAEVEAALEK; GLVEDTLR; ELYQQLQR; CVEDPETGLCLLPLTDK; GANVIAGVWLEEAGQK; LEQLFQDEVAK; TPVEVPVGGFK; EQELQQTLQQEQSVLDQLR; AQFEQLK; LQLEETDHQK; APVPASELLASGVLSR; LLDAQLSTGGIVDPSK; AQAEAQQP…	0.604262	DLLPSDMAVALLEAQAGTGHIIDPATSAR; LLEAAAQSTK; AYSDPSTGEPATYGELQQR; AQAEAQQPTFDALR; LISLFQAMK; LEDLLQDAQDEKEQLNEYK; LFNAIIHR; FLEVQYLTGGLIEPDTPGR; LAEVEAALEK; TVTIWEIINSEYFTAEQR; GLVGPELHDR; LQLEACETR; KQEELQQLEQQR; WQAVLAQTDVR; EQLQLLEEQHR; SIQEELQQLR; GIYQSLEGAVQAGQLK; ELYQQLQR; CVEDPETGLCLLPLTDK; GANVIAGVWLEEAGQK; QAEVELASR; TPVEVPVGGFK; EQELQQTLQQEQSVLDQLR; AQFEQLK; SWSLATFR; LQLEETDHQK; APVPASEL…
Nuclear cap-binding protein subunit 2	NCBP2	P52298	NCBP2	0.881682	SDSYVELSQYR	nd
Cofilin-1	COF1	P23528	CFL1	1.49194	HELQANCYEEVK; NIILEEGKEILVGDVGQTVDDPYATFVK; AVLFCLSEDKK; HELQANCYEEVKDR; EILVGDVGQTVDDPYATFVK; NIILEEGK	1.51478	HELQANCYEEVK; NIILEEGKEILVGDVGQTVDDPYATFVK; AVLFCLSEDKK; LGGSAVISLEGKPL; AVLFCLSEDK; HELQANCYEEVKDR; EILVGDVGQTVDDPYATFVK; NIILEEGK
60S ribosomal protein L8	RL8	P62917	RPL8	0.939223	AVDFAER; ASGNYATVISHNPETK; VGLIAAR; AVVGVVAGGGR; DIIHDPGR; IDKPILK	1.17162	VGLIAAR; AVVGVVAGGGR; DIIHDPGR; AVDFAER; ASGNYATVISHNPETK
Heterogeneous nuclear ribonucleoprotein H	HNRH1	P31943	HNRNPH1	0.934889	SNNVEMDWVLK; EGRPSGEAFVELESEDEVK; GLPWSCSADEVQR	1.10973	SNNVEMDWVLK; GLPWSCSADEVQR
Heterogeneous nuclear ribonucleoprotein H3	HNRH3	P31942	HNRNPH3	0.773794	DGMDNQGGYGSVGR; STGEAFVQFASK; ATENDIANFFSPLNPIR	0.593071	STGEAFVQFASK; VHIDIGADGR; DGMDNQGGYGSVGR; EIAENALGK; ATENDIANFFSPLNPIR
Eukaryotic translation initiation factor 3 subunit D	EIF3D	O15371	EIF3D	1.01854	IFHTVTTTDDPVIR; LGDDIDLIVR	0.925017	IFHTVTTTDDPVIR; LGDDIDLIVR
116 kDa U5 small nuclear ribonucleoprotein component	U5S1	Q15029	EFTUD2	0.675122	SIWAFGPDATGPNILVDDTLPSEVDK; YDWDLLAAR	0.505061	IYADTFGDINYQEFAK; GLAEDIENEVVQITWNR; TLDELGIHLTK
14-3-3 protein beta/alpha	1433B	P31946	YWHAB	1.01661	YLIPNATQPESK; TAFDEAIAELDTLNEESYK; YLSEVASGDNK; QTTVSNSQQAYQEAFEISK; AVTEQGHELSNEER; IEAELQDICNDVLELLDK	1.1097	TAFDEAIAELDTLNEESYK; AVTEQGHELSNEER; YLSEVASGDNK; YLIPNATQPESK; QTTVSNSQQAYQEAFEISK
Actin-related protein 2/3 complex subunit 5-like protein	ARP5L	Q9BPX5	ARPC5L	0.929918	SSEIEQAVQSLDR; ALAVGGLGSIIR	NaN	SSEIEQAVQSLDR; ALAVGGLGSIIR
NADH dehydrogenase [ubiquinone] iron-sulfur protein 7, mitochondrial	NDUS7	O75251	NDUFS7	nd		0.395612	LDDLVNWAR
Protein S100-A11	S10AB	P31949	S100A11	1.07949	ISSPTETER; DPGVLDR; DGYNYTLSK	1.14422	ISSPTETER; DPGVLDR; TEFLSFMNTELAAFTK; NQKDPGVLDR; CIESLIAVFQK; DGYNYTLSK
Stress-induced-phosphoprotein 1	STIP1	P31948	STIP1	1.44092	ALSVGNIDDALQCYSEAIK; LAYINPDLALEEK	1.3031	DPQALSEHLK; ALSVGNIDDALQCYSEAIK; DFDTALK; LAYINPDLALEEK; ELIEQLR
ATPase MORC2	MORC2	Q9Y6X9	MORC2	1.27748	LGGDLTR	0.759296	LGGDLTR
Gelsolin	GELS	P06396	GSN	0.806209	EPGLQIWR; TASDFITK; AQPVQVAEGSEPDGFWEALGGK; DPDQTDGLGLSYLSSHIANVER; EVQGFESATFLGYFK; AGALNSNDAFVLK; QTQVSVLPEGGETPLFK; SEDCFILDHGK; TGAQELLR; TPSAAYLWVGTGASEAEK; DSQEEEKTEALTSAK; YIETDPANR; AVEVLPK; TPITVVK; HVVPNEVVVQR	0.988709	EPGLQIWR; TASDFITK; HVVPNEVVVQR; DPDQTDGLGLSYLSSHIANVER; SEDCFILDHGK; EVQGFESATFLGYFK; AGALNSNDAFVLK; AMAELAA; QTQVSVLPEGGETPLFK; DSQEEEKTEALTSAK; TGAQELLR; TPSAAYLWVGTGASEAEK; ATEVPVSWESFNNGDCFILDLGNNIHQWCGSNSNR; NWRDPDQTDGLGLSYLSSHIANVER; YIETDPANR; AVEVLPK; TPITVVK; AQPVQVAEGSEPDGFWEALGGK
Annexin A6	ANXA6	P08133	ANXA6	1.08637	VFQEFIK; EAILDIITSR; EDAQVAAEILEIADTPSGDK; SLHQAIEGDTSGDFLK; DLIADLK; GLGTDEDTIIDIITHR	1.25875	SLEDALSSDTSGHFR; EEDDVVSEDLVQQDVQDLYEAGELK; DAISGIGTDEK; EEGGENLDQAR; DAFVAIVQSVK; EAILDIITSR; EDAQVAAEILEIADTPSGDK; SLHQAIEGDTSGDFLK; CLIEILASR; ALIEILATR; DLEADIIGDTSGHFQK; DLIADLK; GLGTDEDTIIDIITHR; SEIDLLNIR
C3 and PZP-like alpha-2-macroglobulin domain-containing protein 8	CPMD8	Q8IZJ3	CPAMD8	0.0624409	QLVDIRYSK	nd
Transitional endoplasmic reticulum ATPase	TERA	P55072	VCP	1.42473	MTNGFSGADLTEICQR; GVLFYGPPGCGK; LEILQIHTK; GDDLSTAILK; GDTVLLK; LIVDEAINEDNSVVSLSQPK; GDIFLVR; QAAPCVLFFDELDSIAK; LDQLIYIPLPDEK; EVDIGIPDATGR; NAPAIIFIDELDAIAPK; WALSQSNPSALR; ETVVEVPQVTWEDIGGLEDVK; LAGESESNLR; MDELQLFR; ELQELVQYPVEHPDK; LGDVISIQPCPDVK; EDEEESLNEVGYDDIGGCR; EMVELPLR; ETVVEVPQVTWEDIGGLEDVKR; ESIESEIR	1.71666	GVLFYGPPGCGK; LEILQIHTK; GILLYGPPGTGK; GDTVLLK; LIVDEAINEDNSVVSLSQPK; GDIFLVR; QAAPCVLFFDELDSIAK; LDQLIYIPLPDEK; EVDIGIPDATGR; NAPAIIFIDELDAIAPK; WALSQSNPSALR; ETVVEVPQVTWEDIGGLEDVKR; LAGESESNLR; MDELQLFR; ELQELVQYPVEHPDK; EMVELPLR; GDDLSTAILK; LGDVISIQPCPDVK; DVDLEFLAK; IVSQLLTLMDGLK; ESIESEIR
THO complex subunit 4	THOC4	Q86V81	ALYREF	0.955806	SLGTADVHFER; WQHDLFDSGFGGGAGVETGGK; QQLSAEELDAQLDAYNAR	1.07188	MDMSLDDIIK; SLGTADVHFER; WQHDLFDSGFGGGAGVETGGK; QQLSAEELDAQLDAYNAR
10 kDa heat shock protein, mitochondrial	CH10	P61604	HSPE1	1.36409	FLPLFDR; VVLDDKDYFLFR; VLLPEYGGTK	1.52118	VVLDDKDYFLFR; VLLPEYGGTK
Membrane-associated progesterone receptor component 2	PGRC2	O15173	PGRMC2	nd		NaN	DFSLEQLR
Voltage-dependent anion-selective channel protein 3	VDAC3	Q9Y277	VDAC3	0.321664	LTLDTIFVPNTGK; LTLSALIDGK	0.443436	LTLDTIFVPNTGK; LTLSALIDGK
Gem-associated protein 4	GEMI4	P57678	GEMIN4	NaN	VLAGILR	NaN	VLAGILR
U6 snRNA-associated Sm-like protein LSm6	LSM6	P62312	LSM6	nd		NaN	LNSGVDYR
Serine/threonine-protein phosphatase 2A 55 kDa regulatory subunit B alpha isoform	2ABA	P63151	PPP2R2A	NaN	VVIFQQEQENK	nd
Annexin A1	ANXA1	P04083	ANXA1	0.559775	GVDEATIIDILTK; ALYEAGER; NALLSLAK; DITSDTSGDFR; GLGTDEDTLIEILASR; TPAQFDADELR; SEIDMNDIK	1.03194	GVDEATIIDILTK; GLGTDEDTLIEILASR; GGPGSAVSPYPTFNPSSDVAALHK; ILVALCGGN; NALLSLAK; DITSDTSGDFR; ALYEAGER; VLDLELK; CLTAIVK; TPAQFDADELR; GTDVNVFNTILTTR; SEIDMNDIK
Deoxyuridine 5'-triphosphate nucleotidohydrolase, mitochondrial	DUT	P33316	DUT	1.83447	IFYPEIEEVQALDDTER	2.32279	IFYPEIEEVQALDDTER; IAQLICER
40S ribosomal protein S3	RS3	P23396	RPS3	0.987864	QGVLGIK; AELNEFLTR; GLCAIAQAESLR; IMLPWDPTGK; FVADGIFK; ELAEDGYSGVEVR; LLGGLAVR; ELTAVVQK; GGKPEPPAMPQPVPTA; FGFPEGSVELYAEK; ACYGVLR; TEIIILATR	1.05892	QGVLGIK; AELNEFLTR; GLCAIAQAESLR; DEILPTTPISEQK; IMLPWDPTGK; FVADGIFK; ELAEDGYSGVEVR; KPLPDHVSIVEPK; LLGGLAVR; ELTAVVQK; GGKPEPPAMPQPVPTA; FGFPEGSVELYAEK; ACYGVLR; TEIIILATR
Transcription elongation factor A protein 1	TCEA1	P23193	TCEA1	nd		NaN	NAAGALDLLK
Trifunctional enzyme subunit alpha, mitochondrial	ECHA	P40939	HADHA	1.09842	DLNSDMDSILASLK; DATLTALDR; TLQEVTQLSQEAQR; MQLLEIITTEK; TIEYLEEVAITFAK; SEVSSDEDIQFR; FGELVMTK; FVDLYGAQK; ILQEGVDPK; DTSASAVAVGLK; DSIFSNLTGQLDYQGFEK; FGGGNPELLTQMVSK; TGIEQGSDAGYLCESQK	0.637122	DLNSDMDSILASLK; DATLTALDR; TLQEVTQLSQEAQR; MQLLEIITTEK; GFYIYQEGVK; SEVSSDEDIQFR; FGELVMTK; FVDLYGAQK; ELHSEFSEVMNEIWASDQIR; TVLGTPEVLLGALPGAGGTQR; ILQEGVDPK; DTSASAVAVGLK; DSIFSNLTGQLDYQGFEK; FGGGNPELLTQMVSK; TGIEQGSDAGYLCESQK
G-rich sequence factor 1	GRSF1	Q12849	GRSF1	0.888036	SSPVVNDGVVR; IASFPTAK; TTYLEDLPPPPEYELAPSK; YIEIFPSR; NGENGIHFLLNR	1.18916	SSPVVNDGVVR; IASFPTAK; YIEIFPSR
Drebrin-like protein	DBNL	Q9UJU6	DBNL	1.4266	TWEQQQEVVSR; YQEQGGEASPQR	NaN	TWEQQQEVVSR; SPTDWALFTYEGNSNDIR; NGPALQEAYVR
Cell division control protein 42 homolog	CDC42	P60953	CDC42	0.844961	NVFDEAILAALEPPEPK; YVECSALTQK; WVPEITHHCPK	1.018	YVECSALTQK; NVFDEAILAALEPPEPK
Basigin	BASI	P35613	BSG	1.47255	SESVPPVTDWAWYK; GSDQAIITLR	1.36458	GSDQAIITLR; SELHIENLNMEADPGQYR
60S ribosomal protein L22	RL22	P35268	RPL22	1.05705	AGNLGGGVVTIER; FTLDCTHPVEDGIMDAANFEQFLQER; ITVTSEVPFSK	0.83845	AGNLGGGVVTIER; FTLDCTHPVEDGIMDAANFEQFLQER; ITVTSEVPFSK
DNA damage-binding protein 1	DDB1	Q16531	DDB1	NaN	QGQGQLVTCSGAFK	1.15673	QSGESIDIITR; VTLGTQPTVLR
Prothymosin alpha	PTMA	P06454	PTMA	NaN	EVVEEAENGR	1.64663	EVVEEAENGR
Zinc finger Ran-binding domain-containing protein 2	ZRAB2	O95218	ZRANB2	0.832649	TGYGGGFNER	2.02137	VSDGDWICPDKK
Macrophage migration inhibitory factor	MIF	P14174	MIF	nd		NaN	LLCGLLAER
cAMP-dependent protein kinase type II-alpha regulatory subunit	KAP2	P13861	PRKAR2A	NaN	NLDQEQLSQVLDAMFER	0.996294	NLDQEQLSQVLDAMFER; QQPPDLVEFAVEYFTR
ATP synthase subunit O, mitochondrial	ATPO	P48047	ATP5PO	nd		NaN	SFLSQGQVLK
Methylosome subunit pICln	ICLN	P54105	CLNS1A	1.27248	QQPDTEAVLNGK; GLGTGTLYIAESR	1.18937	GLGTGTLYIAESR
Stomatin-like protein 2, mitochondrial	STML2	Q9UJZ1	STOML2	0.37441	ILEPGLNILIPVLDR; NTVVLFVPQQEAWVVER; ATVLESEGTR; DVQGTDASLDEELDR; QAQILASEAEK; APVPGTPDSLSSGSSR; AEQINQAAGEASAVLAK	0.62893	ILEPGLNILIPVLDR; ATVLESEGTR; QAQILASEAEK; APVPGTPDSLSSGSSR; ESLNASIVDAINQAADCWGIR; AEQINQAAGEASAVLAK
Drebrin	DREB	Q16643	DBN1	1.14671	APPPVFYNKPPEIDITCWDADPVPEEEEGFEGGD; ALDEVTSSQPPPLPPPPPPAQETQEPSPILDSEETR; LREDENAEPVGTTYQK; YVLINWVGEDVPDAR; SPSDSSTASTPVAEQIER; EGTQASEGYFSQSQEEEFAQSEELCAK; DSQAALPK; EESAADWALYTYEDGSDDLK; LELLAAYEEVIR; VAEFFQGVDVIVNASSVEDIDAGAIGQR; AAAPQAWAGPMEEPPQAQAPPR; EQSIFGDHRDEEEETHMK; KSESEVEEAAAIIAQRPDNPR; LAASGEGGLQELSGHFENQK; EQFWEQAK; QQTLEAEEAKR; QQTLEAEEAK; LSSPVLHR; SESEVEEAAAIIAQRPDNPR	1.49687	YVLINWVGEDVPDAR; ALDEVTSSQPPPLPPPPPPAQETQEPSPILDSEETR; LELLAAYEEVIR; LREDENAEPVGTTYQK; EDENAEPVGTTYQK; SESEVEEAAAIIAQRPDNPR; SPSDSSTASTPVAEQIER; VAEFFQGVDVIVNASSVEDIDAGAIGQR; EESAADWALYTYEDGSDDLK; EQSIFGDHRDEEEETHMK; EGTQASEGYFSQSQEEEFAQSEELCAK; AAAPQAWAGPMEEPPQAQAPPR; LSSPVLHR; KSESEVEEAAAIIAQRPDNPR; LAASGEGGLQELSGHFENQK; EQFWEQAK; QQTLEAEEAKR; QQTLEAEEAK; VMYGFCSVK; MAPTPIPTR; DSQAALPK
Filamin-C	FLNC	Q14315	FLNC	0.826283	EVGEHVVSVR; VEESTQVGGDPFPAVFGDFLGR; YADQEVPR; GPGLSQAFVGQK; AEIAFEDR; FNDEHIPDSPFVVPVASLSDDAR; WGDESVPGSPFK; ITESDLSQLTASIR; TPCEEVYVK; NSFTVDCSK; GAGTGGLGLAIEGPSEAK; AFGPGLEGGLVNK; LEPGGGAEAQAVR; VEAAEIVEGEDSAYSVR; SLTATGGNHVTAR; APSGNEEPCLLK	0.849927	VEESTQVGGDPFPAVFGDFLGR; GPGLSQAFVGQK; AEIAFEDR; FNDEHIPDSPFVVPVASLSDDAR; GAGGQGQLDVR; WGDESVPGSPFK; LEPGGGAEAQAVR; TPCEEVYVK; NSFTVDCSK; GAGTGGLGLAIEGPSEAK; AFGPGLEGGLVNK; YGGPQHIVGSPFK; YADQEVPR; LENVSVALEFLER; SLTATGGNHVTAR; APSGNEEPCLLK
Glucosidase 2 subunit beta	GLU2B	P14314	PRKCSH	NaN	ILIEDWK; AQQEQELAADAFK	1.43308	ILIEDWK; ESLQQMAEVTR; AQQEQELAADAFK
V-type proton ATPase catalytic subunit A	VATA	P38606	ATP6V1A	NaN	EILQEEEDLAEIVQLVGK	2.81377	TALVANTSNMPVAAR; EILQEEEDLAEIVQLVGK
Striatin	STRN	O43815	STRN	2.32374	LPEHEINR; LQDMLANLR; CYIASAGADALAK; AQWEVER; SVIDTSTIVR; STSLDVEPIYTFR; SHFDGIR; SELTDSASVLDNFK	3.5648	LPEHEINR; LQDMLANLR; SVIDTSTIVR; ALPDSGEDR; STSLDVEPIYTFR; LLSCSADGTLR; SELTDSASVLDNFK
Vimentin	VIME	P08670	VIM	1.01243	LQEEMLQR; ISLPLPNFSSLNLRETNLDSLPLVDTHSK; VESLQEEIAFLKK; QVQSLTCEVDALK; SYVTTSTR; KVESLQEEIAFLK; LGDLYEEEMR; EMEENFAVEAANYQDTIGR; ILLAELEQLK; DGQVINETSQHHDDLE; LLQDSVDFSLADAINTEFK; LQDEIQNMK; QVDQLTNDK; EKLQEEMLQR; FADLSEAANR; SLYASSPGGVYATR; DNLAEDIMR; VESLQEEIAFLK; ILLAELEQLKGQGK; FANYIDK; QDVDNASLAR; TVETRDGQVINETSQHHDDLE; ETNLDSLPLVDTHSKR; FADLSEAANRNNDALR; EEAENTLQSFR; LQDEIQNMKEEMAR; ETNLDSL…	0.679179	LQEEMLQR; VESLQEEIAFLKK; QVQSLTCEVDALK; SYVTTSTR; KVESLQEEIAFLKK; KVESLQEEIAFLK; LGDLYEEEMR; FLEQQNKILLAELEQLKGQGK; EMEENFAVEAANYQDTIGR; ILLAELEQLK; DGQVINETSQHHDDLE; LLQDSVDFSLADAINTEFK; LHEEEIQELQAQIQEQHVQIDVDVSKPDLTAALR; QVDQLTNDK; EKLQEEMLQR; FADLSEAANR; FANYIDKVR; LGDLYEEEMRELRR; LQEEMLQREEAENTLQSFRQDVDNASLAR; DNLAEDIMR; LQDEIQNMK; VESLQEEIAFLK; ILLAELEQLKGQGK; QQYESVAAK; QDVDNASLAR; QVQSLTC…
Alpha-parvin	PARVA	Q9NVD7	PARVA	nd		0.796361	VLIDWINDVLVGER
Putative thiamine transporter SLC35F3	S35F3	Q8IY50	SLC35F3	nd		1.07118	LLLGSAK
60S ribosomal protein L9	RL9	P32969	RPL9	1.0506	DELILEGNDIELVSNSAALIQQATTVK; TILSNQTVDIPENVDITLK; FLDGIYVSEK	1.09181	DELILEGNDIELVSNSAALIQQATTVK; TICSHVQNMIK; FLDGIYVSEK; TILSNQTVDIPENVDITLK
Cytochrome b-c1 complex subunit 1, mitochondrial	QCR1	P31930	UQCRC1	0.440159	LCTSATESEVAR; NALVSHLDGTTPVCEDIGR; IAEVDASVVR	0.44578	NALVSHLDGTTPVCEDIGR; LCTSATESEVAR; AVELLGDIVQNCSLEDSQIEK; HLGGIPWTYAEDAVPTLTPCR; IAEVDASVVR
Torsin-1A-interacting protein 1	TOIP1	Q5JTV8	TOR1AIP1	nd		0.94606	SELGNQSPSTSSR
Dolichyl-diphosphooligosaccharide--protein glycosyltransferase subunit 2	RPN2	P04844	RPN2	0.749342	SIVEEIEDLVAR	1.24303	SIVEEIEDLVAR; EETVLATVQALQTASHLSQQADLR
Dolichyl-diphosphooligosaccharide--protein glycosyltransferase subunit 1	RPN1	P04843	RPN1	NaN	IDHILDAL	NaN	IDHILDAL
Cyclin-dependent kinase-like 2	CDKL2	Q92772	CDKL2	0.152702	FLESDDDK	5.26228	FLESDDDK
Ubiquitin carboxyl-terminal hydrolase isozyme L1	UCHL1	P09936	UCHL1	NaN	FSAVALCK; LGFEDGSVLK	1.39691	FSAVALCK; LGFEDGSVLK; NEAIQAAHDAVAQEGQCR
Replication protein A 14 kDa subunit	RFA3	P35244	RPA3	nd		NaN	IIHDFPQFYPLGIVQHD
CREB-regulated transcription coactivator 2	CRTC2	Q53ET0	CRTC2	nd		NaN	LPSALNR
Eukaryotic translation initiation factor 3 subunit M	EIF3M	Q7L2H7	EIF3M	0.672899	WISDWNLTTEK	nd
Prohibitin-2	PHB2	Q99623	PHB2	0.556696	AQNLKDLAGR; IGGVQQDTILAEGLHFR; AQFLVEK; ESVFTVEGGHR; FNASQLITQR; IVQAEGEAEAAK; LGLDYEER	2.11087	IGGVQQDTILAEGLHFR; EYTAAVEAK; IYLTADNLVLNLQDESFTR; FNASQLITQR; IVQAEGEAEAAK; LGLDYEER
Prolyl 4-hydroxylase subunit alpha-2	P4HA2	O15460	P4HA2	NaN	QLDAGEEATTTK; APQLLIAPFKEEDEWDSPHIVR	0.991636	SAADAEGYLAHPVNAYK
28S ribosomal protein S27, mitochondrial	RT27	Q92552	MRPS27	0.701366	VELQQGLR; EALDVLGAVLK	NaN	EALDVLGAVLK
Serine/arginine-rich splicing factor 5	SRSF5	Q13243	SRSF5	1.07761	GFGFVEFEDPR	nd
Sodium channel protein type 8 subunit alpha	SCN8A	Q9UQD0	SCN8A	nd		NaN	TFVVLNR
Disabled homolog 2	DAB2	P98082	DAB2	2.33213	TGQQAEPLVVDLK; LIGIDDVPDAR	2.33528	TDEYLLAR; INEPPKPAPR; DLFQVIYNVK; TGQQAEPLVVDLK; LIGIDDVPDAR
Eukaryotic translation initiation factor 5B	IF2P	O60841	EIF5B	NaN	LAHCEELR	nd
Isoform 2 of Sciellin	SCEL	O95171-2	SCEL	0.820388	NISEELDNLIK	nd
Ubiquinol-cytochrome-c reductase complex assembly factor 1	UQCC1	Q9NVA1	UQCC1	NaN	TDFEEFFLR	nd
Glutamine--tRNA ligase	SYQ	P47897	QARS	1.16872	ECGVGVIVTPEQIEEAVEAAINR	1.39688	ECGVGVIVTPEQIEEAVEAAINR; LGYFSVDPDSHQGK
Synaptosomal-associated protein 23	SNP23	O00161	SNAP23	0.798564	AHQITDESLESTR; IDIANAR; TTWGDGGENSPCNVVSK; ILGLAIESQDAGIK; IEEGLDQINK	0.954586	TTWGDGGENSPCNVVSK; ILGLAIESQDAGIK; EDEMEENLTQVGSILGNLK; IDIANAR; AHQITDESLESTR; TITMLDEQK; IEEGLDQINK
Heat shock protein beta-1	HSPB1	P04792	HSPB1	nd		1.50388	LFDQAFGLPR; LATQSNEITIPVTFESR
Protein SOGA3	SOGA3	Q5TF21	SOGA3	NaN	ATPLAPKGAAPGAVQPVAGAEAAPAATLAALGGR	nd
ATP-binding cassette sub-family D member 3	ABCD3	P28288	ABCD3	NaN	IANPDQLLTQDVEK	nd
39S ribosomal protein L11, mitochondrial	RM11	Q9Y3B7	MRPL11	0.752927	AQDEAFALQDVPLSSVVR; EVAGLVTLK	nd
Splicing factor 3B subunit 6	SF3B6	Q9Y3B4	SF3B6	0.690728	GTAYVVYEDIFDAK; ITAEEMYDIFGK	nd
Filamin-A	FLNA	P21333	FLNA	2.43772	AWGPGLEGGVVGK; ENGVYLIDVK; DQEFTVK; AFGPGLQGGSAGSPAR; AHVVPCFDASK; VEPGLGADNSVVR; ASGPGLNTTGVPASLPVEFTIDAK; THEAEIVEGENHTYCIR; DKGEYTLVVK; ANLPQSFQVDTSK; YGGPYHIGGSPFK; FVPAEMGTHTVSVK; KDGSCGVAYVVQEPGDYEVSVK; DNGNGTYSCSYVPR; EGPYSISVLYGDEEVPR; VQVQDNEGCPVEALVK; VNVGAGSHPNK; TFSVWYVPEVTGTHK; SPYTVTVGQACNPSACR; GEITGEVR; AEAGVPAEFSIWTR; VGSAADIPINISETDLSLLTATVVPPSGR; DVDIIDHHDNTYTVK; YGGDEIPFSPYR; …	2.70743	TGVELGKPTHFTVNAK; ENGVYLIDVK; AFGPGLQGGSAGSPAR; FGGEHVPNSPFQVTALAGDQPSVQPPLR; VPVHDVTDASK; YGGQPVPNFPSK; SADFVVEAIGDDVGTLGFSVEGPSQAK; SPYTVTVGQACNPSACR; SPFEVYVDK; ETGEHLVHVK; SPFSVAVSPSLDLSK; VDINTEDLEDGTCR; LDVQFSGLTK; LTVSSLQESGLK; EEGPYEVEVTYDGVPVPGSPFPLEAVAPTKPSK; MDCQECPEGYR; AHEPTYFTVDCAEAGQGDVSIGIK; NGQHVASSPIPVVISQSEIGDASR; VAQPTITDNK; IANLQTDLSDGLR; AWGPGLEGGVVGK; DQEFTVK; FNGTHIPGSPFK;…
AP-3 complex subunit delta-1	AP3D1	O14617	AP3D1	0.826968	DVPVAEEVSALFAGELNPVAPK	0.99561	DVPVAEEVSALFAGELNPVAPK
Splicing factor, proline- and glutamine-rich	SFPQ	P23246	SFPQ	0.886194	LFVGNLPADITEDEFKR; ISDSEGFK; AELDDTPMR; ANLSLLR; LFVGNLPADITEDEFK; FGQGGAGPVGGQGPR; NLSPYVSNELLEEAFSQFGPIER	1.14058	LFVGNLPADITEDEFKR; ISDSEGFK; YGEPGEVFINK; ALAEIAK; ANLSLLR; LFVGNLPADITEDEFK; FGQGGAGPVGGQGPR; NLSPYVSNELLEEAFSQFGPIER
Succinate dehydrogenase [ubiquinone] iron-sulfur subunit, mitochondrial	SDHB	P21912	SDHB	nd		NaN	QQYLQSIEER
Mitochondrial carrier homolog 1	MTCH1	Q9NZJ7	MTCH1	nd		0.524304	YIVQVDGK; GSSLLFR
Staphylococcal nuclease domain-containing protein 1	SND1	Q7KZF4	SND1	1.30584	VITEYLNAQESAK; NLPGLVQEGEPFSEEATLFTK; DTNGENIAESLVAEGLATR	0.696662	GDVGLGLVK; QINLSNIR; LGTLSPAFSTR; VITEYLNAQESAK; NLPGLVQEGEPFSEEATLFTK; EADGSETPEPFAAEAK
Acetyl-CoA acetyltransferase, mitochondrial	THIL	P24752	ACAT1	nd		NaN	LEDLIVK
Translocon-associated protein subunit gamma	SSRG	Q9UNL2	SSR3	NaN	QQSEEDLLLQDFSR	nd
Protein phosphatase 1B	PPM1B	O75688	PPM1B	1.06709	QLLEEMLTSYR; NVIEAVYSR; VEEIMEK; ALGDYDYK; SGSALELSVENVK; GPTEQLVSPEPEVYEILR; SGEEGMPDLAHVMR; ILSAENIPNLPPGGGLAGK; LEVSDDLENVCNWVVDTCLHK; VANYCSTHLLEHITTNEDFR; NGQVCFSTQDHKPCNPR; HIYFINCGDSR	1.13341	QLLEEMLTSYR; NVIEAVYSR; SRLEVSDDLENVCNWVVDTCLHK; VEEIMEK; ALGDYDYK; SGSALELSVENVK; GPTEQLVSPEPEVYEILR; ILSAENIPNLPPGGGLAGK; SGSTAVGVMISPK; SGEEGMPDLAHVMR; LEVSDDLENVCNWVVDTCLHK; VANYCSTHLLEHITTNEDFR; NGQVCFSTQDHKPCNPR; HIYFINCGDSR
B-cell receptor-associated protein 31	BAP31	P51572	BCAP31	nd		NaN	AENQVLAMR
Neuroblast differentiation-associated protein AHNAK	AHNK	Q09666	AHNAK	1.09612	VDINTPDVDVHGPDWHLK; VDINAPDVEVHGPDWHLK; VTAPDVDLHLK; VDVEVPDVSLEGPEGK; GSEVGFHGAAPDISVK; VNVEAPDVNLEGLGGK; VDVECPDVNIEGPEGK; APDVDVNIAGPDAALK; IGIPGVK; EVDVNLPK; VDVDVPDVNIEGPDAK; FNFSGSK; VGIDTPDIDIHGPEGK; GEGPDVDVNLPK; VGGSGVNVNAK; VQANLGAPDINIEGLDAK; IKGDVPSVGLEGPDVDLQGPEAK; GEGPEVDVK; ISMSEVDLNVAAPK; VDIDVPDVNLEAPEGK; VDIDAPDVDVHGPDWHLK; GSLGATGEIK; GPEVDIK; LEGDLTGPSVGVEVPDVELECPDAK; VDIDTPD…	1.3733	ADIEISGPK; VDVEVPDVSLEGPEGK; VDTNAPDLSLEGPEGK; ADVDVSGPK; GEGPEVDVK; ISMPDFDLHLK; LEGPDVSLK; MEGGGAEVHAQLPSLEGDLR; MPEMNIK; SPSLDVTVPEAELNLETPEISVGGK; MDIDVPDVEVQGPDWHLK; IDVTAPDVSIEEPEGK; VDINAPDVEVQGK; FGTFGGLGSK; VDIDAPDVDVHGPDWHLK; VDIDVPDVNVQGPDWHLK; VDVDIPDVNIEGPDAK; VSVGAPDLSLEASEGSIK; GEGPEVDMNLPK; VSMPDVELNLK; GSEVGFHGAAPDISVK; AEGPEVDVNLPK; APDVDVNIAGPDAALK; FNFSGSK; VQANLGAPDINIEGLDAK;…
60S ribosomal protein L17	RL17	P18621	RPL17	1.18287	QWGWTQGR; GLDVDSLVIEHIQVNK; EQIVPKPEEEVAQK	1.07244	QWGWTQGR; YSLDPENPTK; GLDVDSLVIEHIQVNK; EQIVPKPEEEVAQK
Anoctamin-10	ANO10	Q9NW15	ANO10	NaN	WGTLLMK	nd
Programmed cell death protein 6	PDCD6	O75340	PDCD6	1.05721	LSDQFHDILIR	NaN	LSDQFHDILIR; YITDWQNVFR
14-3-3 protein theta	1433T	P27348	YWHAQ	1.25553	QTIDNSQGAYQEAFDISK; TAFDEAIAELDTLNEDSYK; AVTEQGAELSNEER; YLAEVACGDDR; YLAEVACGDDRK	1.31689	YLAEVACGDDRK; YLAEVACGDDR; TAFDEAIAELDTLNEDSYK; AVTEQGAELSNEER; SICTTVLELLDK
Centrosome and spindle pole-associated protein 1	CSPP1	Q1MSJ5	CSPP1	nd		NaN	TRARSPEICK
Caprin-1	CAPR1	Q14444	CAPRIN1	1.36404	QGLNGVPILSEEELSLLDEFYK; QILGVIDK; YQEVTNNLEFAK; TVLELQYVLDK; LNQDQLDAVSK	1.39923	DGYQQNFK; YQEVTNNLEFAK; QILGVIDK; TVLELQYVLDK; QGLNGVPILSEEELSLLDEFYK; LNQDQLDAVSK
40S ribosomal protein S29	RS29	P62273	RPS29	nd		NaN	YGLNMCR
RNA-binding motif protein, X chromosome	RBMX	P38159	RBMX	0.745748	ALEAVFGK; VEQATKPSFESGR	1.39616	ALEAVFGK; VEQATKPSFESGR
NADH dehydrogenase [ubiquinone] flavoprotein 2, mitochondrial	NDUV2	P19404	NDUFV2	0.357612	DIEEIIDELK; AAAVLPVLDLAQR	0.493968	DIEEIIDELK; AAAVLPVLDLAQR; NSDSILEAIQK
Acidic leucine-rich nuclear phosphoprotein 32 family member B	AN32B	Q92688	ANP32B	nd		1.41753	IFGGLDMLAEK
NADH dehydrogenase [ubiquinone] 1 alpha subcomplex subunit 8	NDUA8	P51970	NDUFA8	0.329001	CALDFFR; PGIVELPTLEELK; LGWVRPDLGELSK; PGIVELPTLEELKVDEVK; FDECVLDK	0.555116	CALDFFR; PGIVELPTLEELK; ISSAVLK; PGIVELPTLEELKVDEVK; FDECVLDK
Major vault protein	MVP	Q14764	MVP	0.889171	QMTEAIGPSTIR; SFFLQPGEQLEQGIQDVYVLSEQQGLLLR; AQLELEVSK; IEGEGSVLQAK; AQQLAEVEVK; GAVASVTFDDFHK; ALQPLEEGEDEEK; LFSVPDFVGDACK; QAIPLDENEGIYVQDVK; ELELVYAR; VEVVEER; ALLDFEDK; DQAVFPQNGLVVSSVDVQSVEPVDQR; DAQGLVLFDVTGQVR; EVEVVEIIQATIIR; VASGPSPGEGISPQSAQAPQAPGDNHVVPVLR; HYCTVANPVSR; DLAVAGPEMQVK; LAQDPFPLYPGEVLEK; VSHQAGDHWLIR; GPLEYVPSAK; AQALAIETEAELQR; VVAGDEWLFEGPGTYIPR; ALLDFEDKDGDK; TAVFGFETS…	1.05051	QMTEAIGPSTIR; AQLELEVSK; IEGEGSVLQAK; AQQLAEVEVK; GAVASVTFDDFHK; ALQPLEEGEDEEK; HADLEIR; LFSVPDFVGDACK; QAIPLDENEGIYVQDVK; VEVVEER; ELELVYAR; ALLDFEDK; DQAVFPQNGLVVSSVDVQSVEPVDQR; EVEVVEIIQATIIR; GQDPLADR; HYCTVANPVSR; LAQDPFPLYPGEVLEK; VSHQAGDHWLIR; AQALAIETEAELQR; VVAGDEWLFEGPGTYIPR; ALLDFEDKDGDK; TAVFGFETSEAK; ILDQSEAEK; VASGPSPGEGISPQSAQAPQAPGDNHVVPVLR; VPHNAAVQVYDYR; ELPPGVEELLNK
Cofilin-2	COF2	Q9Y281	CFL2	1.61262	LLPLNDCR; QIIVEEAK; QILVGDIGDTVEDPYTSFVK	1.239	HEWQVNGLDDIKDR; LLPLNDCR; QIIVEEAK; QILVGDIGDTVEDPYTSFVK
Endoplasmin	ENPL	P14625	HSP90B1	NaN	SGTSEFLNK; GYEVIYLTEPVDEYCIQALPEFDGK	1.80098	SGTSEFLNK; EEASDYLELDTIK; EEEAIQLDGLNASQIR; IADDKYNDTFWK; SILFVPTSAPR; SGYLLPDTK; FAFQAEVNR; NLLHVTDTGVGMTR; LIINSLYK
3-hydroxyacyl-CoA dehydrogenase type-2	HCD2	Q99714	HSD17B10	nd		NaN	LVGQGASAVLLDLPNSGGEAQAK; LGNNCVFAPADVTSEK; DLAPIGIR
Liprin-beta-1	LIPB1	Q86W92	PPFIBP1	NaN	DTEGLIQEINDLR	nd
U1 small nuclear ribonucleoprotein 70 kDa	RU17	P08621	SNRNP70	0.930521	EFEVYGPIK	NaN	EFEVYGPIK
Peptidyl-prolyl cis-trans isomerase FKBP10	FKB10	Q96AY3	FKBP10	nd		NaN	IIIPPFLAYGEK
Isocitrate dehydrogenase [NADP], mitochondrial	IDHP	P48735	IDH2	NaN	DIFQEIFDK	nd
40S ribosomal protein SA	RSSA	P08865	RPSA	1.08907	YVDIAIPCNNK; ADHQPLTEASYVNLPTIALCNTDSPLR; LLVVTDPR; SDGIYIINLK; FAAATGATPIAGR; AIVAIENPADVSVISSR	1.22493	FTPGTFTNQIQAAFR; YVDIAIPCNNK; KSDGIYIINLK; ADHQPLTEASYVNLPTIALCNTDSPLR; LLVVTDPR; SDGIYIINLK; FAAATGATPIAGR; AIVAIENPADVSVISSR
Glycylpeptide N-tetradecanoyltransferase 1	NMT1	P30419	NMT1	nd		2.34514	GSETDSAQDQPVK
Lysosome-associated membrane glycoprotein 1	LAMP1	P11279	LAMP1	nd		NaN	ALQATVGNSYK
Metaxin-2	MTX2	O75431	MTX2	0.278435	GHSLSDGLEEVQK; ANAEYMSPSGK; RIEQHYFEDR; QPTELDALVFGHLYTILTTQLTNDELSEK; IEQHYFEDR; TLDQVLEDVDQCCQALSQR	0.300267	GHSLSDGLEEVQK; TLDQVLEDVDQCCQALSQR; ANAEYMSPSGK
Contactin-5	CNTN5	O94779	CNTN5	nd		NaN	NTVTNAR
PRKC apoptosis WT1 regulator protein	PAWR	Q96IZ0	PAWR	0.803915	STTSVSEEDVSSR; DANVSGTLVSSSTLEK; LKEEIDLLNR; TSSGLGGSTTDFLEEWK	0.704014	DLDDIEDENEQLKQENK; DANVSGTLVSSSTLEK; LKEEIDLLNR; STTSVSEEDVSSR; TSSGLGGSTTDFLEEWK
60S ribosomal protein L18	RL18	Q07020	RPL18	1.00478	TNSTFNQVVLK; TNRPPLSLSR; ILTFDQLALDSPK; GCGTVLLSGPR; TAVVVGTITDDVR	1.13787	TNSTFNQVVLK; ILTFDQLALDSPK; SQDIYLR; GCGTVLLSGPR; TNRPPLSLSR; TAVVVGTITDDVR
Complement component 1 Q subcomponent-binding protein, mitochondrial	C1QBP	Q07021	C1QBP	0.834763	AFVDFLSDEIK; GVDNTFADELVELSTALEHQEYITFLEDLK; EVSFQSTGESEWK; ALVLDCHYPEDEVGQEDEAESDIFSIR; AFVDFLSDEIKEER; VEEQEPELTSTPNFVVEVIK	1.17971	ALVLDCHYPEDEVGQEDEAESDIFSIR; AFVDFLSDEIKEER; AFVDFLSDEIK; VEEQEPELTSTPNFVVEVIK; EVSFQSTGESEWK
Density-regulated protein	DENR	O43583	DENR	nd		0.858021	LTVENSPK
DNA-directed RNA polymerases I, II, and III subunit RPABC1	RPAB1	P19388	POLR2E	1.54459	IIRPSETAGR; GYLVTQDELDQTLEEFK	NaN	IIRPSETAGR
Zinc finger protein 436	ZN436	Q9C0F3	ZNF436	0.188509	SDLIKHYR	NaN	SDLIKHYR
EF-hand domain-containing protein D2	EFHD2	Q96C19	EFHD2	0.94697	VQAINVSSR; EFLLIFR; ADLNQGIGEPQSPSR; VFNPYTEFK; EVDEDFDSK; LSEIDVSSEGVK; AAAGELQEDSGLCVLAR	0.878401	VQAINVSSR; EFLLIFR; ADLNQGIGEPQSPSR; VFNPYTEFK; EVDEDFDSK; LSEIDVSSEGVK; AAAGELQEDSGLCVLAR
Cysteine and glycine-rich protein 1	CSRP1	P21291	CSRP1	0.451643	GFGFGQGAGALVHSE; GLESTTLADKDGEIYCK	0.566421	GFGFGQGAGALVHSE; GLESTTLADKDGEIYCK
Integrin alpha-3	ITA3	P26006	ITGA3	nd		1.60471	YTQVLWSGSEDQR; AAFVSEQQQK; TGAVYLCPLTAHK; SETVLTCATGR
X-ray repair cross-complementing protein 5	XRCC5	P13010	XRCC5	1.1596	AFREEAIK; DQVTAQEIFQDNHEDGPTAK; TDTLEDLFPTTK; ETVYCLNDDDETEVLK; YAPTEAQLNAVDALIDSMSLAK; EEASGSSVTAEEAK; TLFPLIEAK; EDIIQGFR; EDGSGDRGDGPFR; EGLEIVK; ETVYCLNDDDETEVLKEDIIQGFR	1.10718	DQVTAQEIFQDNHEDGPTAK; ETVYCLNDDDETEVLK; TDTLEDLFPTTK; HIEIFTDLSSR; LFQCLLHR; YAPTEAQLNAVDALIDSMSLAK; EEASGSSVTAEEAK; HLMLPDFDLLEDIESK; SQLDIIIHSLK; TLFPLIEAK; CFSVLGFCK; EDIIQGFR; QYMFSSLK; IQPGSQQADFLDALIVSMDVIQHETIGK; EDGSGDRGDGPFR; EGLEIVK; ETVYCLNDDDETEVLKEDIIQGFR
Protein phosphatase 1 regulatory subunit 12A	MYPT1	O14974	PPP1R12A	1.40882	TGSYGALAEITASK; LYEQILAENEK; STQGVTLTDLQEAEK; SGSYSYLEER; SYLTPVRDEESESQR; WIGSETDLEPPVVK; TYDETYQR; VGQTAFDVADEDILGYLEELQK	1.476	SLLEMEK; TGSYGALAEITASK; LYEQILAENEK; STQGVTLTDLQEAEK; SGSYSYLEER; LAYVAPTIPR; LASTSDIEEK; VGQTAFDVADEDILGYLEELQK; AQLHDTNMELTDLK
E3 SUMO-protein ligase PIAS4	PIAS4	Q8N2W9	PIAS4	nd		1.80736	QVELIRNSR
Zinc finger CCCH-type antiviral protein 1	ZCCHV	Q7Z2W4	ZC3HAV1	0.981471	ATDLGGTSQAGTSQR	nd
Programmed cell death 6-interacting protein	PDC6I	Q8WUM4	PDCD6IP	nd		NaN	FTDLFEK
Heterogeneous nuclear ribonucleoprotein D-like	HNRDL	O14979	HNRNPDL	NaN	VFVGGLSPDTSEEQIK	1.12975	MFIGGLSWDTSK; DLTEYLSR; VFVGGLSPDTSEEQIK
RNA-binding protein PNO1	PNO1	Q9NRX1	PNO1	NaN	QAEQLSAAGEGGDAGR	nd
Isoform 5 of cAMP-specific 3',5'-cyclic phosphodiesterase 4D	PDE4D	Q08499-6	PDE4D	0.00942397	LSPVISPR	102.88	LSPVISPR
Thyroid hormone receptor-associated protein 3	TR150	Q9Y2W1	THRAP3	0.879063	SPPSTGSTYGSSQK; GSFSDTGLGDGK; SPLQSVVVR; EQTFSGGTSQDTK	1.07835	GSFSDTGLGDGK; SPLQSVVVR; YKDDPVDLR; EQTFSGGTSQDTK
Protein disulfide-isomerase	PDIA1	P07237	P4HB	0.969435	QFLQAAEAIDDIPFGITSNSDVFSK; EADDIVNWLK; DGVVLFK; HNQLPLVIEFTEQTAPK; ITEFCHR; QLAPIWDK; TGPAATTLPDGAAAESLVESSEVAVIGFFK; DHENIVIAK; YKPESEELTAER; ENLLDFIK; ILEFFGLK; NNFEGEVTK; SNFAEALAAHK; NFEDVAFDEK; MDSTANEVEAVK	1.39241	EADDIVNWLK; TVIDYNGER; LITLEEEMTK; ALAPEYAK; DGVVLFK; HNQLPLVIEFTEQTAPK; ITEFCHR; QLAPIWDK; TGPAATTLPDGAAAESLVESSEVAVIGFFK; YKPESEELTAER; ENLLDFIK; ILEFFGLK; SNFAEALAAHK; QFLQAAEAIDDIPFGITSNSDVFSK; NFEDVAFDEK; MDSTANEVEAVK
Cytochrome c oxidase subunit 6B1	CX6B1	P14854	COX6B1	0.358848	TAPFDSR; GGDISVCEWYQR; VYQSLCPTSWVTDWDEQR; NCWQNYLDFHR	0.468195	TAPFDSR; GGDISVCEWYQR; VYQSLCPTSWVTDWDEQR; NCWQNYLDFHR
Aminopeptidase N	AMPN	P15144	ANPEP	0.955749	STVYCNAIAQGGEEEWDFAWEQFR; GVGGSQPPDIDKTELVEPTEYLVVHLK; ENSLLFDPLSSSSSNK; SEYMEGNVR; TELVEPTEYLVVHLK; ALEQALEK; FSTEYELQQLEQFK; QASNGVLIR; VNYDEENWR; VVATTQMQAADAR; IQTQLQR; YLSYTLNPDLIR; DLMVLNDVYR; QQQDYWLIDVR; ELWILNR; AQIINDAFNLASAHK; FSTEYELQQLEQFKK; DNEETGFGSGTR; EATDVIIIHSK; DHSAIPVINR; EVVLQWFTENSK; DLTALSNMLPK	1.14616	STVYCNAIAQGGEEEWDFAWEQFR; GVGGSQPPDIDKTELVEPTEYLVVHLK; ENSLLFDPLSSSSSNK; TELVEPTEYLVVHLK; ALEQALEK; FSTEYELQQLEQFK; QASNGVLIR; VNYDEENWR; VVATTQMQAADAR; IQTQLQR; YLSYTLNPDLIR; DLMVLNDVYR; QQQDYWLIDVR; DSQYEMDSEFEGELADDLAGFYR; ELWILNR; AQIINDAFNLASAHK; FSTEYELQQLEQFKK; DNEETGFGSGTR; EATDVIIIHSK; DHSAIPVINR; EVVLQWFTENSK; DLTALSNMLPK
Isoform 2 of F-actin-capping protein subunit beta	CAPZB	P47756-2	CAPZB	0.617464	SVQTFADK; NDLVEALK	0.837889	SVQTFADK; NDLVEALK
Lamin-B2	LMNB2	Q03252	LMNB2	0.617872	ISEKEEVTTR; LQIEIGK; EGELTVAQGR	1.052	ISEKEEVTTR; LQIEIGK
CD44 antigen	CD44	P16070	CD44	0.911192	SQEMVHLVNK; ESSETPDQFMTADETR; FAGVFHVEK; LVINSGNGAVEDR; ALSIGFETCR; NLQNVDMK	1.21219	YGFIEGHVVIPR; LVINSGNGAVEDR; ESSETPDQFMTADETR; FAGVFHVEK; SQEMVHLVNK; ALSIGFETCR; NLQNVDMK
SH3 domain-binding glutamic acid-rich-like protein 3	SH3L3	Q9H299	SH3BGRL3	0.998945	ATPPQIVNGDQYCGDYELFVEAVEQNTLQEFLK; VYSTSVTGSR; IQYQLVDISQDNALRDEMR; IQYQLVDISQDNALR	0.98453	ATPPQIVNGDQYCGDYELFVEAVEQNTLQEFLK; IQYQLVDISQDNALRDEMR; VYSTSVTGSR; IQYQLVDISQDNALR
Phosphatidylinositol-binding clathrin assembly protein	PICAL	Q13492	PICALM	0.671049	EGLDIYK; QAALEEEQAR; ITAAQHSVTGSAVSK; QVAFDFTK; LTGGSNWQPK; NDVNWSQPGEK; GDIPDLSQAPSSLLDALEQHLASLEGK	1.16361	TTNSSWVVVFK; QAALEEEQAR; ITAAQHSVTGSAVSK; QVAFDFTK; LVSDDLDSSLANLVGNLGIGNGTTK; LTGGSNWQPK; NDVNWSQPGEK
Centrosomal protein of 170 kDa	CE170	Q5SW79	CEP170	NaN	STGSATSLASQGER	NaN	STGSATSLASQGER; IDLLAQPR
26S proteasome non-ATPase regulatory subunit 11	PSD11	O00231	PSMD11	1.27792	LYDNLLEQNLIR; EQSILELGSLLAK	1.58829	TGQAAELGGLLK; EQSILELGSLLAK
14-3-3 protein eta	1433F	Q04917	YWHAH	1.04269	ELETVCNDVLSLLDK; AVTELNEPLSNEDR; NCNDFQYESK; YLAEVASGEK; QAFDDAIAELDTLNEDSYK; NSVVEASEAAYK	1.12353	ELETVCNDVLSLLDK; AVTELNEPLSNEDR; NCNDFQYESK; YLAEVASGEK; QAFDDAIAELDTLNEDSYK; NSVVEASEAAYK; EQMQPTHPIR
Isoform 3 of Drebrin-like protein	DBNL	Q9UJU6-3	DBNL	nd		NaN	YQEQGGEASPQSR
Membrane-associated progesterone receptor component 1	PGRC1	O00264	PGRMC1	nd		2.00567	EALKDEYDDLSDLTAAQQETLSDWESQFTFK; DFTPAELR
Hsp90 co-chaperone Cdc37	CDC37	Q16543	CDC37	1.29391	LGPGGLDPVEVYESLPEELQK; ELEVAEGGK	NaN	ELEVAEGGK
Procollagen galactosyltransferase 1	GT251	Q8NBJ5	COLGALT1	0.527655	ALQAQEIECR; NSDVLQSPLDSAAR; EGLDWDLIYVGR; EWLVAVK	0.671485	ALQAQEIECR; EGLDWDLIYVGR; EEYGFLPVPLR
T-complex protein 1 subunit gamma	TCPG	P49368	CCT3	1.46502	ELGIWEPLAVK; IDDIVSGHK; TIADIIR; ALDDMISTLK; IPGGIIEDSCVLR; KGESQTDIEITR; IVLLDSSLEYK; TLIQNCGASTIR; TAVETAVLLLR; AVAQALEVIPR	1.4293	IDDIVSGHK; TIADIIR; ALDDMISTLK; IPGGIIEDSCVLR; IVLLDSSLEYK; TLIQNCGASTIR; TAVETAVLLLR; AVAQALEVIPR
Polyadenylate-binding protein 4	PABP4	Q13310	PABPC4	1.1046	EFSPFGSITSAK; GFGFVSYEK; NFGEEVDDESLK; NFGEEVDDESLKELFSQFGK	0.828573	FSPAGPVLSIR; EFSPFGSITSAK; NFGEEVDDESLKELFSQFGK; GFGFVSYEK
Triosephosphate isomerase	TPIS	P60174	TPI1	1.35526	TATPQQAQEVHEK	1.68476	TATPQQAQEVHEK; SNVSDAVAQSTR; IAVAAQNCYK; VVLAYEPVWAIGTGK; IIYGGSVTGATCK
Peroxiredoxin-2	PRDX2	P32119	PRDX2	NaN	GLFIIDGK; ATAVVDGAFK; TDEGIAYR	1.53097	KEGGLGPLNIPLLADVTR; IGKPAPDFK; GLFIIDGK; ATAVVDGAFK; EGGLGPLNIPLLADVTR
Fragile X mental retardation syndrome-related protein 2	FXR2	P51116	FXR2	nd		NaN	GSFFKVTMAVPEDLR
40S ribosomal protein S27	RS27	P42677	RPS27	NaN	DLLHPSPEEEK	nd
DNA topoisomerase 1	TOP1	P11387	TOP1	0.975343	LEVQATDREENK	1.31712	LEVQATDREENK; LNTGILNK
Voltage-dependent anion-selective channel protein 2	VDAC2	P45880	VDAC2	0.319387	SCSGVEFSTSGSSNTDTGK; LTFDTTFSPNTGK; LTLSALVDGK; WCEYGLTFTEK; GFGFGLVK; WNTDNTLGTEIAIEDQICQGLK; YQLDPTASISAK	0.348893	SCSGVEFSTSGSSNTDTGK; NNFAVGYR; LTFDTTFSPNTGK; LTLSALVDGK; WCEYGLTFTEK; GFGFGLVK; WNTDNTLGTEIAIEDQICQGLK; YQLDPTASISAK
Bcl-2-associated transcription factor 1	BCLF1	Q9NYF8	BCLAF1	NaN	TIAPQNAPR	1.33667	MIASDSHRPEVK
High mobility group protein HMGI-C	HMGA2	P52926	HMGA2	NaN	GEGAGQPSTSAQGQPAAPAPQK	0.31435	GEGAGQPSTSAQGQPAAPAPQK
Lamina-associated polypeptide 2, isoforms beta/gamma	LAP2B	P42167	TMPO	1.22571	SSTPLPTISSSAENTR; QEDKDDLDVTELTNEDLLDQLVK	1.37064	SSTPLPTISSSAENTR; QEDKDDLDVTELTNEDLLDQLVK; SELVANNVTLPAGEQR
Selenoprotein F	SEP15	O60613	SELENOF	0.652786	LLDDNGNIAEELSILK	nd
Isoform 2 of Heterogeneous nuclear ribonucleoprotein A/B	ROAA	Q99729-2	HNRNPAB	1.10523	IFVGGLNPEATEEK	1.32464	IFVGGLNPEATEEK
Probable ATP-dependent RNA helicase DDX6	DDX6	P26196	DDX6	1.07217	SIEEQLGTEIKPIPSNIDK; NLVCTDLFTR; SGAYLIPLLER	0.95764	SIEEQLGTEIKPIPSNIDK; NLVCTDLFTR; LAETYLHR; SGAYLIPLLER
BTB/POZ domain-containing protein KCTD2	KCTD2	Q14681	KCTD2	1.13114	ELAEEGVLEEAEFYNIASLVR	nd
AP-2 complex subunit alpha-1	AP2A1	O95782	AP2A1	1.50066	KGPGAGSALDDGR; DFLTPPLLSVR; LEPNAQAQMYR; FINLFPETK; FFQPTEMAAQDFFQR; LVECLETVLNK; LLQCYPPPEDAAVK; QLSLPQQEAQK; FHLCSVATR; YLETADYAIR; ATIQGVLR; LLGFGSALLDNVDPNPENFVGAGIIQTK; AADLLYAMCDR	1.07853	DFLTPPLLSVR; ALQVGCLLR; FINLFPETK; FFQPTEMAAQDFFQR; LVECLETVLNK; LLQCYPPPEDAAVK; QLSLPQQEAQK; IVSSASTDLQDYTYYFVPAPWLSVK; ILVAGDSMDSVK; ATIQGVLR; NNGVLFENQLLQIGVK; LLGFGSALLDNVDPNPENFVGAGIIQTK; AADLLYAMCDR
Actin-related protein 2/3 complex subunit 1A	ARC1A	Q92747	ARPC1A	0.988926	TLESSIQGLR; WSPLENK; LAWVSHDSTVSVADASK; SVQVSTLK	1.46788	TLESSIQGLR; WSPLENK; DGVWKPTLVILR; LAWVSHDSTVSVADASK
Eukaryotic translation initiation factor 4 gamma 1	IF4G1	Q04637	EIF4G1	0.957282	VDVAVLK; EAVGDLLDAFK	1.08773	VDVAVLK; EAVGDLLDAFK; EFLPEGQDIGAFVAEQK
Heat shock protein HSP 90-beta	HS90B	P08238	HSP90AB1	1.32377	LGIHEDSTNR; LGLGIDEDEVAAEEPNAAVPDEIPPLEGDEDASR; NPDDITQEEYGEFYK; HLEINPDHPIVETLR	1.02184	NPDDITQEEYGEFYK; VFIMDSCDELIPEYLNFIR; LGIHEDSTNR; LGLGIDEDEVAAEEPNAAVPDEIPPLEGDEDASR; YHTSQSGDEMTSLSEYVSR; ALLFIPR; CLELFSELAEDKENYK; HLEINPDHPIVETLR
F-actin-capping protein subunit alpha-2	CAZA2	P47755	CAPZA2	nd		NaN	EGAAHAFAQYNLDQFTPVK; TSVETALR
NADH-ubiquinone oxidoreductase 75 kDa subunit, mitochondrial	NDUS1	P28331	NDUFS1	0.253239	LEEVSPNLVR; NDGAAILAAVSSIAQK; FAYDGLK; VALIGSPVDLTYTYDHLGDSPK; SATYVNTEGR; FASEIAGVDDLGTTGR; FEAPLFNAR	0.502255	LEEVSPNLVR; SWLHNDLK; NDGAAILAAVSSIAQK; VAVTPPGLAR; VALIGSPVDLTYTYDHLGDSPK; SATYVNTEGR; IASQVAALDLGYKPGVEAIR; LVNQQLLADPLVPPQLTIK; FASEIAGVDDLGTTGR; ILQDIASGSHPFSQVLK; FEAPLFNAR
60S ribosomal protein L23	RL23	P62829	RPL23	1.00442	IASNAGSIA; ISLGLPVGAVINCADNTGAK; GSAITGPVAK	1.10965	ECADLWPR; ISLGLPVGAVINCADNTGAK
OCIA domain-containing protein 1	OCAD1	Q9NX40	OCIAD1	0.511491	VFAECNDESFWFR	0.531745	ESYEVSLTQK
Galectin-3	LEG3	P17931	LGALS3	nd		9.92854	IALDFQR
La-related protein 4	LARP4	Q71RC2	LARP4	0.425393	LTTDPDLILEVLR	NaN	LTTDPDLILEVLR
Aconitate hydratase, mitochondrial	ACON	Q99798	ACO2	nd		1.37987	NDANPETHAFVTSPEIVTALAIAGTLK; DINQEVYNFLATAGAK
GTP-binding nuclear protein Ran	RAN	P62826	RAN	1.28041	LVLVGDGGTGK; NLQYYDISAK; HLTGEFEK	1.44328	LVLVGDGGTGK; FNVWDTAGQEK; VCENIPIVLCGNK; NLQYYDISAK; HLTGEFEK
39S ribosomal protein L49, mitochondrial	RM49	Q13405	MRPL49	0.630273	DVEDFLSPLLGK	1.35484	DVEDFLSPLLGK
Guanine nucleotide-binding protein subunit alpha-11	GNA11	P29992	GNA11	nd		NaN	IATLGYLPTQQDVLRVRVPTTGIIEYPFDLENIIFR; IATLGYLPTQQDVLR; YYLTDVDR
Histone H1.0	H10	P07305	H1F0	NaN	VGENADSQIK	nd
Heterogeneous nuclear ribonucleoprotein A3	ROA3	P51991	HNRNPA3	0.698485	EDTEEYNLR; RGEEGHDPKEPEQLR; SSGSPYGGGYGSGGGSGGYGSR; WGTLTDCVVMR; GFAFVTFDDHDTVDK; LFIGGLSFETTDDSLR; YHTINGHNCEVK; EDSVKPGAHLTVK	0.961933	EDTEEYNLR; IETIEVMEDR; RGEEGHDPKEPEQLR; LFIGGLSFETTDDSLR; WGTLTDCVVMR; GFAFVTFDDHDTVDK; SSGSPYGGGYGSGGGSGGYGSR; EDSVKPGAHLTVK
Cytospin-B	CYTSB	Q5M775	SPECC1	0.606524	ELGDVQGHGR	NaN	EICDHQAEQLSR
CUB domain-containing protein 1	CDCP1	Q9H5V8	CDCP1	NaN	ISFLCDDLTR; IYVVDLSNER	1.83352	ISFLCDDLTR; TFIWDVK; IYVVDLSNER
Cytoplasmic dynein 1 intermediate chain 2	DC1I2	Q13409	DYNC1I2	NaN	SVSTPSEAGSQDSGDGAVGSR	nd
Isoform 4 of Plectin	PLEC	Q15149-4	PLEC	0.339391	TSSEDNLYLAVLR; VPQPEGLGR	0.46399	TSSEDNLYLAVLR; VPQPEGLGR
Caveolae-associated protein 1	CAVN1	Q6NZI2	CAVIN1	0.855042	SDQVNGVLVLSLLDK; IIGAVDQIQLTQAQLEER; EGQVEVLK	0.808463	SDQVNGVLVLSLLDK; IIGAVDQIQLTQAQLEER
Isoform 3 of Microtubule-actin cross-linking factor 1, isoforms 1/2/3/5	MACF1	Q9UPN3-3	MACF1	nd		NaN	AALLDQALSNAR
Epsin-2	EPN2	O95208	EPN2	nd		NaN	ALTLLDYLIK
Leucine--tRNA ligase, cytoplasmic	SYLC	Q9P2J5	LARS	1.1863	SFITTDVNPYYDSFVR; QEFEFWYPVDLR; VDIGDTIIYLVH	1.47589	SFITTDVNPYYDSFVR; EVWDYVFFK; VDIGDTIIYLVH; LALADAGDTVEDANFVEAMADAGILR
BEN domain-containing protein 3	BEND3	Q5T5X7	BEND3	0.781654	LFPELFDHR; HSVDSVLTALQDSSK; LFPELFTAENLR; NPPSGDLLNVYELFEK; QIVDQSLSGGDLACR	0.976461	IPLDELVVPSPDFPVPSPYLLSDK; QIVDQSLSGGDLACR
S-phase kinase-associated protein 1	SKP1	P63208	SKP1	1.14996	TDDIPVWDQEFLK; NDFTEEEEAQVR; RTDDIPVWDQEFLK; GLLDVTCK	1.2894	TDDIPVWDQEFLK; NDFTEEEEAQVR; GLLDVTCK
F-actin-capping protein subunit beta	CAPZB	P47756	CAPZB	0.757606	LEVEANNAFDQYR; DYLLCDYNR; GCWDSIHVVEVQEK; DIVNGLR; STLNEIYFGK; KLEVEANNAFDQYR; LVEDMENK	0.649976	STLNEIYFGK; DYLLCDYNR; SGSGTMNLGGSLTR; LVEDMENK; GCWDSIHVVEVQEK
Solute carrier family 2, facilitated glucose transporter member 1	GTR1	P11166	SLC2A1	0.640041	TPEELFHPLGADSQV; VTILELFR; TFDEIASGFR	0.866471	TPEELFHPLGADSQV; VTILELFR; SFEMLILGR; TFDEIASGFR
Beta-2-glycoprotein 1	APOH	P02749	APOH	0.0237317	EHSSLAFWK; TDASDVKPC	47.7111	EHSSLAFWK; TDASDVKPC
Calumenin	CALU	O43852	CALU	0.502977	EEIVDKYDLFVGSQATDFGEALVR; IDGDKDGFVTVDELK; GHDLNEDGLVSWEEYK; DWILPSDYDHAEAEAR; WIYEDVER; TFDQLTPEESK; EQFVEFR	0.753709	GHDLNEDGLVSWEEYK; DWILPSDYDHAEAEAR; VHNDAQSFDYDHDAFLGAEEAK; DGFVTVDELK; EQFVEFR; WIYEDVER
EGF-like repeat and discoidin I-like domain-containing protein 3	EDIL3	O43854	EDIL3	nd		NaN	VTGVITQGAK
Translocon-associated protein subunit alpha	SSRA	P43307	SSR1	0.758728	GEDFPANNIVK; GTEDFIVESLDASFR	1.21053	FLVGFTNK; GTEDFIVESLDASFR
Heat shock protein 105 kDa	HS105	Q92598	HSPH1	1.22863	FVVQNVSAQK; NAVEEYVYEFR; AGGIETIANEFSDR; AFNDPFIQK	1.15202	FVVQNVSAQK; IEVPLYSLLEQTHLK; AGGIETIANEFSDR; SQFEELCAELLQK; NAVEEYVYEFR; FICEQDHQNFLR; DLLNMYIETEGK
Small nuclear ribonucleoprotein Sm D3	SMD3	P62318	SNRPD3	1.49997	FLILPDMLK	1.26036	FLILPDMLK; VAQLEQVYIR
60S ribosomal protein L14	RL14	P50914	RPL14	1.00399	LVAIVDVIDQNR; CMQLTDFILK; ALVDGPCTQVR	1.07021	LVAIVDVIDQNR; CMQLTDFILK; ALVDGPCTQVR
Unconventional myosin-XVIIIa	MY18A	Q92614	MYO18A	NaN	AVEELLECLDLEK	0.235092	DLALGLVPGDR; TALEEQLSR
Ubiquitin-conjugating enzyme E2 Q2	UB2Q2	Q8WVN8	UBE2Q2	10.9786	MSVSGLK	nd
60S ribosomal protein L29	RL29	P47914	RPL29	NaN	AQAAAPASVPAQAPK; LAYIAHPK	1.17739	AQAAAPASVPAQAPK; LAYIAHPK
Translocator protein	TSPO	P30536	TSPO	nd		0.530721	FVHGEGLR
AP-2 complex subunit sigma	AP2S1	P53680	AP2S1	1.54306	FILIQNR; QLLMLQSLE; HTNFVEFR; WYMQFDDDEK	0.66975	FILIQNR; QLLMLQSLE; HTNFVEFR; WYMQFDDDEK; VYTVVDEMFLAGEIR
Serine/threonine-protein kinase 38	STK38	Q15208	STK38	0.76655	RFEGLTAR; LGLEDFESLK; FCCEWEHR; SNSFFEGVDWEHIR; VTLENFYSNLIAQHEER; DILVEADSLWVVK; DIKPDNLLLDSK; ETLTFPPEVPISEK; IGAPGVEEIK; VMEEEGLKDEEKR	0.79439	RFEGLTAR; FCCEWEHR; SNSFFEGVDWEHIR; FEGLTAR; VMEEEGLKDEEK; VTLENFYSNLIAQHEER; DILVEADSLWVVK; DIKPDNLLLDSK; LGLEDFESLK; NLNHSLPSDFTFQNMNSK
Ribosomal oxygenase 1	RIOX1	Q9H6W3	RIOX1	0.952563	VLAELNR	nd
Junction plakoglobin	PLAK	P14923	JUP	0.616754	SAIVHLINYQDDAELATR; LLNDEDPVVVTK; QEGLESVLK; ATIGLIR; NLALCPANHAPLQEAAVIPR; ISEDKNPDYR; SGGIPALVR; LAEPSQLLK; AGDKDDITEPAVCALR; NEGTATYAAAVLFR	0.997077	SAIVHLINYQDDAELATR; LLNDEDPVVVTK; HVAAGTQQPYTDGVR; NLSDVATK; NLALCPANHAPLQEAAVIPR; ATIGLIR; ISEDKNPDYR; SGGIPALVR; LAEPSQLLK; QEGLESVLK
Calponin-3	CNN3	Q15417	CNN3	1.18892	DGIILCELINK; YDHQAEEDLR; GASQAGMLAPGTR	1.13157	DGIILCELINK; YDHQAEEDLR; GASQAGMLAPGTR
Transmembrane emp24 domain-containing protein 10	TMEDA	P49755	TMED10	nd		NaN	LKPLEVELR
Epsin-1	EPN1	Q9Y6I3	EPN1	1.37119	ENMYAVQTLK; TALPTSGSSAGELELLAGEVPAR	nd
BTB/POZ domain-containing protein KCTD5	KCTD5	Q9NXV2	KCTD5	0.759934	GGIGAGLGGGLCR; LCQADPDLDSDKDETGAYLIDR; LCQADPDLDSDKDETGAYLIDRDPTYFGPVLNYLR; ELHNTPYGTASEPSEK	0.950074	GGIGAGLGGGLCR; LCQADPDLDSDKDETGAYLIDR; ELHNTPYGTASEPSEK
Prohibitin	PHB	P35232	PHB	0.965655	QVSDDLTER; AAIISAEGDSK; DLQNVNITLR; IFTSIGEDYDER; FDAGELITQR	1.12601	VLPSITTEILK; AAIISAEGDSK; IFTSIGEDYDER; FDAGELITQR
Destrin	DEST	P60981	DSTN	1.16311	CIIVEEGK; YALYDASFETK; HECQANGPEDLNR	1.1552	YALYDASFETK; HECQANGPEDLNR; HFVGMLPEK
NADH dehydrogenase [ubiquinone] iron-sulfur protein 3, mitochondrial	NDUS3	O75489	NDUFS3	0.372888	SLVDLTAVDVPTR; VVAEPVELAQEFR	0.517931	SLVDLTAVDVPTR; DFPLSGYVELR; TYTDELTPIESAVSVFK; ILTDYGFEGHPFR; QLSAFGEYVAEILPK
Desmoplakin	DESP	P15924	DSP	nd		NaN	YEVTSGGGGTSR
Endoplasmic reticulum resident protein 44	ERP44	Q9BS26	ERP44	nd		1.05179	VDCDQHSDIAQR
Sialic acid synthase	SIAS	Q9NR45	NANS	nd		4.20225	GSDHSASLEPGELAELVR
Mitochondrial import receptor subunit TOM6 homolog	TOM6	Q96B49	TOMM6	NaN	NLSDIDLMAPQPGV	NaN	NLSDIDLMAPQPGV
Isoform 8 of Filamin-B	FLNB	O75369-8	FLNB	1.21856	ALSEFFK	1.32039	ALSEFFK
Serine-threonine kinase receptor-associated protein	STRAP	Q9Y3F4	STRAP	0.910253	SFEAPATINSASLHPEK; TVDFTQDSNYLLTGGQDK; YDYNSGEELESYK; VWDAVSGDELMTLAHK; QGDTGDWIGTFLGHK	1.2184	QGDTGDWIGTFLGHK; YDYNSGEELESYK
40S ribosomal protein S7	RS7	P62081	RPS7	1.11251	DVNFEFPEFQL; VETFSGVYK; HVVFIAQR; IVKPNGEKPDEFESGISQALLELEMNSDLK; ELNITAAK	1.04782	ELNITAAK; IVKPNGEKPDEFESGISQALLELEMNSDLK; AIIIFVPVPQLK; HVVFIAQR; TLTAVHDAILEDLVFPSEIVGK; DVNFEFPEFQL; VETFSGVYK
40S ribosomal protein S8	RS8	P62241	RPS8	1.08545	LTPEEEEILNK; ELEFYLR; LDVGNFSWGSECCTR; ADGYVLEGK; IIDVVYNASNNELVR; NCIVLIDSTPYR; ISSLLEEQFQQGK	1.00764	LTPEEEEILNK; ELEFYLR; LDVGNFSWGSECCTR; QWYESHYALPLGR; IIDVVYNASNNELVR; NCIVLIDSTPYR; ISSLLEEQFQQGK
Phospholipid phosphatase 2	PLPP2	O43688	PLPP2	nd		3.0952	GNPADVTEAR
26S proteasome regulatory subunit 6A	PRS6A	P17980	PSMC3	1.80367	DSYLILETLPTEYDSR	NaN	EKAPSIIFIDELDAIGTK
40S ribosomal protein S15a	RS15A	P62244	RPS15A	0.937232	WQNNLLPSR; MNVLADALK	1.04463	WQNNLLPSR; MNVLADALK; HGYIGEFEIIDDHR
Protein kinase C and casein kinase substrate in neurons protein 3	PACN3	Q9UKS6	PACSIN3	2.1993	ADSAVSQEQLR	nd
Serpin H1	SERPH	P50454	SERPINH1	0.828756	DEEVHAGLGELLR; LYGPSSVSFADDFVR; DTQSGSLLFIGR	1.14711	DEEVHAGLGELLR; TGLYNYYDDEKEK; LYGPSSVSFADDFVR; AVLSAEQLR; LQIVEMPLAHK; DTQSGSLLFIGR; DQAVENILVSPVVVASSLGLVSLGGK
40S ribosomal protein S16	RS16	P62249	RPS16	0.951206	LLEPVLLLGK; DILIQYDR; FAGVDIR; ALVAYYQK	1.03574	LLEPVLLLGK; DILIQYDR; FAGVDIR; ALVAYYQK
MTOR-associated protein MEAK7	MEAK7	Q6P9B6	MEAK7	0.976158	LLGPQWLDYDCDR	nd
Casein kinase II subunit alpha	CSK21	P68400	CSNK2A1	1.51719	VLGTEDLYDYIDK	nd
Ras-related protein Rab-3B	RAB3B	P20337	RAB3B	nd		NaN	GQLLAEQLGFDFFEASAK
Homeobox protein SIX5	SIX5	Q8N196	SIX5	nd		0.0949464	ALVAFQR
Isoform LCRMP-4 of Dihydropyrimidinase-related protein 3	DPYL3	Q14195-2	DPYSL3	NaN	GSGSRPGIEGDTPR	1.81382	TLDFDALSVGQR
60S ribosomal protein L35	RL35	P42766	RPL35	1.07715	QLDDLKVELSQLR; VLTVINQTQK	1.00914	QLDDLKVELSQLR; VLTVINQTQK
rRNA 2'-O-methyltransferase fibrillarin	FBRL	P22087	FBL	NaN	DLINLAK	NaN	VSISEGDDKIEYR
5'-3' exoribonuclease 2	XRN2	Q9H0D6	XRN2	NaN	NSPGSQVASNPR; DPQFAEDYIFK	NaN	NSPGSQVASNPR
Tubulin beta-4B chain	TBB4B	P68371	TUBB4B	NaN	INVYYNEATGGK	0.893379	INVYYNEATGGK
Pre-mRNA-splicing factor ATP-dependent RNA helicase DHX15	DHX15	O43143	DHX15	1.00631	VESLLVTAISK; FTDILVR; VAAMSVAQR	1.48574	FTDILVR; VESLLVTAISK
Janus kinase and microtubule-interacting protein 1	JKIP1	Q96N16	JAKMIP1	nd		NaN	GRSKGEKPEMETDAVQMANEELR
Transmembrane protein 214	TM214	Q6NUQ4	TMEM214	nd		NaN	SLQETIQSLK
Serine/threonine-protein phosphatase 2A catalytic subunit alpha isoform	PP2AA	P67775	PPP2CA	1.59653	ELDQWIEQLNECK	2.11899	ELDQWIEQLNECK
Leucine-rich repeat flightless-interacting protein 1	LRRF1	Q32MZ4	LRRFIP1	0.786597	DMLLELEEQLAESR; EFTNQEAAEPK; EVPAHSTEVGR	NaN	NEIVANVGK; EFTNQEAAEPK
Vacuolar protein sorting-associated protein VTA1 homolog	VTA1	Q9NP79	VTA1	nd		NaN	QLGDNEAITQEIVGCAHLENYALK
Prefoldin subunit 5	PFD5	Q99471	PFDN5	nd		1.24084	NQLDQEVEFLSTSIAQLK
Sarcolemmal membrane-associated protein	SLMAP	Q14BN4	SLMAP	1.46143	SLSNTEDECTHLK; TQTVLSELK; CRPAQNNATFDCK; IEALQADNDFTNER	2.65033	SDVIHAPLPSPVDK; SLSNTEDECTHLK; DDLQGAQSEIEAK; IEALQADNDFTNER
Isoform 5 of Heterogeneous nuclear ribonucleoprotein Q	HNRPQ	O60506-5	SYNCRIP	NaN	GVEAGPDLLQ	nd
Coatomer subunit beta	COPB	P53618	COPB1	1.603	TNNVSEHEDTDKYR	0.800559	TNNVSEHEDTDKYR
E3 ubiquitin-protein ligase TRIM38	TRI38	O00635	TRIM38	NaN	LEKEEQQTLSR	0.607102	LEKEEQQTLSR
Splicing factor 3B subunit 2	SF3B2	Q13435	SF3B2	NaN	FTVAELK; GIEKPPFELPDFIK; AAVLLEQER	NaN	FTVAELK; AAVLLEQER
Protein FAM227A	F227A	F5H4B4	FAM227A	NaN	IADINLR	nd
Splicing factor U2AF 65 kDa subunit	U2AF2	P26368	U2AF2	0.948255	NFAFLEFR; ELLTSFGPLK; YCDPDSYHR; LFIGGLPNYLNDDQVK; SIEIPRPVDGVEVPGCGK	1.23035	NFAFLEFR; ELLTSFGPLK; LFIGGLPNYLNDDQVK; SIEIPRPVDGVEVPGCGK
Histone H1.5	H15	P16401	HIST1H1B	0.846891	KATGPPVSELITK; ATGPPVSELITK; NGLSLAALK; ALAAGGYDVEK	0.998193	KATGPPVSELITK; ATGPPVSELITK; NGLSLAALK; ALAAGGYDVEK
Desmoglein-2	DSG2	Q14126	DSG2	1.04098	IVAISEDYPR; VVPSFLPVDQGGSLVGR; FLDDLGLK; QESTSVLLQQSEK; LPDFESR; DTGEIYTTSVTLDR; ILDVNDNIPVVENK; GQIIGNFQAFDEDTGLPAHAR; DNWISVDSVTSEIK; VTQEIVTER; SEIQFLISDNQGFSCPEK; EETPFFLLTGYALDAR	1.04043	IVAISEDYPR; VVPSFLPVDQGGSLVGR; FLDDLGLK; QESTSVLLQQSEK; DTGEIYTTSVTLDR; ILDVNDNIPVVENK; EETPFFLLTGYALDAR; ATQFTGATGAIMTTETTK; DNWISVDSVTSEIK; VTQEIVTER; SEIQFLISDNQGFSCPEK; GQIIGNFQAFDEDTGLPAHAR
BMP-2-inducible protein kinase	BMP2K	Q9NSY1	BMP2K	1.4472	ITDTIGPTETSIAPR; ENISVALTDGK	NaN	VLQQLQQGDWR
Transgelin-3	TAGL3	Q9UI15	TAGLN3	0.644642	QGQNVIGLQMGSNK; LINSLYPPGQEPIPK; YDADLENK; QMEQISQFLK; LVDWIILQCAEDIEHPPPGR; TTDIFQTVDLWEGK; GFSEEQLR; GPSYGLSR	0.756618	TTDIFQTVDLWEGK; LINSLYPPGQEPIPK; YDADLENK; QMEQISQFLK; LVDWIILQCAEDIEHPPPGR; QGQNVIGLQMGSNK; WLMDGTVLCK; GPSYGLSR
NADH dehydrogenase [ubiquinone] 1 alpha subcomplex subunit 6	NDUA6	P56556	NDUFA6	NaN	VVDLLVIK	0.458186	VVDLLVIK; FFHETEAPRPK
T-complex protein 1 subunit delta	TCPD	P50991	CCT4	1.2429	IDDVVNTR; DALSDLALHFLNK; SIHDALCVIR; VIDPATATSVDLR; LGGTIDDCELVEGLVLTQK; GDVTITNDGATILK; FSNISAAK	0.943275	IDDVVNTR; DALSDLALHFLNK; VIDPATATSVDLR; LGGTIDDCELVEGLVLTQK; GDVTITNDGATILK; ALIAGGGAPEIELALR; FSNISAAK
Nucleophosmin	NPM	P06748	NPM1	1.23981	VDNDENEHQLSLR; MTDQEAIQDLWQWRK; DELHIVEAEAMNYEGSPIK; MTDQEAIQDLWQWR; GPSSVEDIKAK; VTLATLK; GPSSVEDIK	1.47638	VDNDENEHQLSLR; MTDQEAIQDLWQWRK; DELHIVEAEAMNYEGSPIK; MTDQEAIQDLWQWR; GPSSVEDIKAK; VTLATLK; GPSSVEDIK; MSVQPTVSLGGFEITPPVVLR
Alpha-actinin-4	ACTN4	O43707	ACTN4	0.906598	STLPDADR; STLPDADRER; QLEAIDQLHLEYAK; AGTQIENIDEDFRDGLK; TIPWLEDR; DYETATLSDIK; MLDAEDIVNTARPDEK; VEQIAAIAQELNELDYYDSHNVNTR; LVSIGAEEIVDGNAK; ETTDTDTADQVIASFK; VLAVNQENEHLMEDYEK; QGEAEFNR; EAILAIHK; KDDPVTNLNNAFEVAEK; DHGGALGPEEFK; GISQEQMQEFR; ACLISLGYDVENDR; HRPELIEYDK; LSGSNPYTTVTPQIINSK; AGTQIENIDEDFR; NFITAEELR; MAPYQGPDAVPGALDYK; ASFNHFDK; DDPVTNLNNAFEVAEK; VQQLVPK; DHALLEEQSK; KAGTQIENIDED…	0.917779	STLPDADR; STLPDADRER; LSGSNPYTTVTPQIINSK; QLEAIDQLHLEYAK; AGTQIENIDEDFRDGLK; ETTDTDTADQVIASFK; DYETATLSDIK; MLDAEDIVNTARPDEK; VEQIAAIAQELNELDYYDSHNVNTR; LVSIGAEEIVDGNAK; TIPWLEDR; VLAVNQENEHLMEDYEK; QGEAEFNR; NVNVQNFHISWK; EAILAIHK; KDDPVTNLNNAFEVAEK; DHGGALGPEEFK; GISQEQMQEFR; NFITAEELR; QFASQANVVGPWIQTK; ACLISLGYDVENDR; HRPELIEYDK; ISIEMNGTLEDQLSHLK; AGTQIENIDEDFR; ASFNHFDK; ICDQWDALGSLTHSR; VQ…
T-complex protein 1 subunit theta	TCPQ	P50990	CCT8	1.4578	LFVTNDAATILR; ETEGDVTSVK; HFSGLEEAVYR; LVPGGGATEIELAK; AVDDGVNTFK; DIDEVSSLLR	1.589	FAEAFEAIPR; LFVTNDAATILR; ETEGDVTSVK; HFSGLEEAVYR; GSTDNLMDDIER; TVGATALPR; QITSYGETCPGLEQYAIK; AVDDGVNTFK; YNIMLVR; LVPGGGATEIELAK; DIDEVSSLLR
Pleckstrin homology-like domain family A member 1	PHLA1	Q8WV24	PHLDA1	0.63145	SDGLLQLWK	NaN	SDGLLQLWK
Olfactory receptor 1B1	OR1B1	Q8NGR6	OR1B1	NaN	IGAAILR	nd
Coordinator of PRMT5 and differentiation stimulator	COPRS	Q9NQ92	COPRS	0.97922	EQPGDLFNEDWDSELK; GTQSIPNDSPAR	1.14883	EQPGDLFNEDWDSELK
Dolichyl-diphosphooligosaccharide--protein glycosyltransferase subunit DAD1	DAD1	P61803	DAD1	NaN	FLEEYLSSTPQR	1.61004	FLEEYLSSTPQR
Plasminogen activator inhibitor 1 RNA-binding protein	PAIRB	Q8NC51	SERBP1	1.06765	RPDQQLQGEGK; PGHLQEGFGCVVTNR; FDQLFDDESDPFEVLK	1.20192	RPDQQLQGEGK; PGHLQEGFGCVVTNR; FDQLFDDESDPFEVLK; RFEKPLEEK
Heat shock 70 kDa protein 4	HSP74	P34932	HSPA4	1.86893	AFSDPFVEAEK; QDLPALEEKPR; EDIYAVEIVGGATR; VLATAFDTTLGGR; TSTVDLPIENQLLWQIDR; KPVVDCVVSVPCFYTDAER; LFEELGK; SNLAYDIVQLPTGLTGIK; ELSTTLNADEAVTR; AGGIETIANEYSDR; AESEEMETSQAGSK; WNSPAEEGSSDCEVFSK	1.67982	AFSDPFVEAEK; CTPACISFGPK; QDLPALEEKPR; VTYMEEER; NFTTEQVTAMLLSK; KFDEVLVNHFCEEFGK; TSTVDLPIENQLLWQIDR; KPVVDCVVSVPCFYTDAER; LFEELGK; QSLTMDPVVK; SNLAYDIVQLPTGLTGIK; ELSTTLNADEAVTR; AGGIETIANEYSDR; EFSITDVVPYPISLR; AESEEMETSQAGSK; WNSPAEEGSSDCEVFSK
SRA stem-loop-interacting RNA-binding protein, mitochondrial	SLIRP	Q9GZT3	SLIRP	0.788656	NALQQENHIIDGVK; CILPFDK; LPQTSDDEKKDF; GLGWVQFSSEEGLR; SINQPVAFVR	0.994334	NALQQENHIIDGVK; CILPFDK; LPQTSDDEKKDF; GLGWVQFSSEEGLR; SINQPVAFVR
Ventricular zone-expressed PH domain-containing protein homolog 1	MELT	Q14D04	VEPH1	nd		160.702	RDRSLPR
40S ribosomal protein S12	RS12	P25398	RPS12	1.00846	VVGCSCVVVK; LVEALCAEHQINLIK; TALIHDGLAR; QAHLCVLASNCDEPMYVK; LGEWVGLCK; DVIEEYFK	0.981963	VVGCSCVVVK; LVEALCAEHQINLIK; TALIHDGLAR; QAHLCVLASNCDEPMYVK; LGEWVGLCK; DVIEEYFK
26S proteasome non-ATPase regulatory subunit 7	PSMD7	P51665	PSMD7	NaN	DLGLPTEAYISVEEVHDDGTPTSK	nd
Abnormal spindle-like microcephaly-associated protein	ASPM	Q8IZT6	ASPM	0.620822	MNTERILYK; QQSIAALK	0.660999	QQSIAALK
Annexin A11	ANX11	P50995	ANXA11	nd		NaN	SETDLLDIR
Cadherin-2	CADH2	P19022	CDH2	0.983287	SAAPHPGDIGDFINEGLK; FLEAGIYEVPIIITDSGNPPK; IDPVNGQITTIAVLDR; LSDPANWLK; VCQCDSNGDCTDVDR; DWVIPPINLPENSR; FAIQTDPNSNDGLVTVVKPIDFETNR	1.46481	SAAPHPGDIGDFINEGLK; FAIQTDPNSNDGLVTVVKPIDFETNR; DWVIPPINLPENSR; VCQCDSNGDCTDVDR
Kinesin-like protein KIF11	KIF11	P52732	KIF11	1.3366	ETTIDGEELVK; TVYFSEQWVSSLNER; ASAHSIVECDPVR; TLHQIFEK; FCADSDGFSQELR; LDIPTGTTPQR; ILQDSLGGR; VEETTEHLVTK; NLNSLFNNMEELIK; LTDNGTEFSVK; VITALVER; LNLVDLAGSENIGR; SYLYPSTLVR; EHLLDQLK; IGAVEEELNR; LTVQEEQIVELIEK; TSLTVADKIEDQK; LMNLWTER; LLNTVEETTK; LNCFLEQDLK; NGVYISEENFR; EYTEEIER; SKVEETTEHLVTK; QCGNLTEDLK; EEYITSALESTEEK; EQELHNLLEVVSQCCEASSSDITEK; VTELFMDNK; AVDQHNAEAQDIFGK; SPNEEYTWEEDPLAGII…	1.54242	NILNKPEVNQK; ETTIDGEELVK; TVYFSEQWVSSLNER; ASAHSIVECDPVR; TLHQIFEK; LIAQNLELNETIK; LDIPTGTTPQR; ILQDSLGGR; GLEEITVHNKDEVYQILEK; NLNSLFNNMEELIK; LNCFLEQDLK; LTDNGTEFSVK; VITALVER; LNLVDLAGSENIGR; SYLYPSTLVR; EHLLDQLK; IGAVEEELNR; LTVQEEQIVELIEK; TSLTVADKIEDQK; LMNLWTER; LLNTVEETTK; FCADSDGFSQELR; NGVYISEENFR; SKVEETTEHLVTK; QCGNLTEDLK; EEYITSALESTEEK; EQELHNLLEVVSQCCEASSSDITEK; VTELFMDNK; DEVYQILE…
Semaphorin-3B	SEM3B	Q13214	SEMA3B	NaN	IEDGKGK	nd
Translocation protein SEC62	SEC62	Q99442	SEC62	0.308253	IQEVGEPSKEEK	nd
Exosome RNA helicase MTR4	MTREX	P42285	MTREX	0.839685	DLRPVDNR; EYPFILDAFQR; AIGNTELENK; LTEQLAGPLR	nd
Mitotic checkpoint protein BUB3	BUB3	O43684	BUB3	0.672281	VAVEYLDPSPEVQK; TPCNAGTFSQPEK	NaN	VAVEYLDPSPEVQK
Nuclear autoantigenic sperm protein	NASP	P49321	NASP	nd		NaN	ELLPEIR
Enhancer of rudimentary homolog	ERH	P84090	ERH	0.874026	ADTQTYQPYNK; TYADYESVNECMEGVCK	1.13586	ADTQTYQPYNK; TYADYESVNECMEGVCK
60S ribosomal protein L7a	RL7A	P62424	RPL7A	1.04004	NFGIGQDIQPK; AGVNTVTTLVENK; KVVNPLFEK; TCTTVAFTQVNSEDK; VVNPLFEK; HWGGNVLGPK	1.01388	NFGIGQDIQPK; AGVNTVTTLVENK; KVVNPLFEK; TCTTVAFTQVNSEDK; HWGGNVLGPK; LKVPPAINQFTQALDR; QTATQLLK
60S ribosomal protein L12	RL12	P30050	RPL12	1.01499	CTGGEVGATSALAPK; IGPLGLSPK; HPHDIIDDINSGAVECPAS; EILGTAQSVGCNVDGR; QAQIEVVPSASALIIK; HSGNITFDEIVNIAR	1.12584	CTGGEVGATSALAPK; IGPLGLSPK; HPHDIIDDINSGAVECPAS; EILGTAQSVGCNVDGR; QAQIEVVPSASALIIK; HSGNITFDEIVNIAR
ATPase family AAA domain-containing protein 1	ATAD1	Q8NBU5	ATAD1	NaN	DAAFQNVLTHVCLD	NaN	DAAFQNVLTHVCLD
Polyadenylate-binding protein 1	PABP1	P11940	PABPC1	1.00549	EFSPFGTITSAK; GYGFVHFETQEAAER	0.761761	EFSPFGTITSAK; GYGFVHFETQEAAER
Sorting nexin-9	SNX9	Q9Y5X1	SNX9	NaN	FEEEFIK	nd
Ephrin type-A receptor 2	EPHA2	P29317	EPHA2	1.64716	FADIVSILDK	0.818779	FADIVSILDK
39S ribosomal protein L54, mitochondrial	RM54	Q6P161	MRPL54	nd		1.10766	TLEELDPESR
Heterogeneous nuclear ribonucleoprotein A/B	ROAA	Q99729	HNRNPAB	NaN	EYFGEFGEIEAIELPMDPK; EVYQQQQYGSGGR; GFGFILFK	1.24286	EVYQQQQYGSGGR; GFGFILFK; MFVGGLSWDTSK
60 kDa heat shock protein, mitochondrial	CH60	P10809	HSPD1	0.926653	IGIEIIK; VGGTSDVEVNEK; AAVEEGIVLGGGCALLR; GIIDPTK; IQEIIEQLDVTTSEYEK; LVQDVANNTNEEAGDGTTTATVLAR; DDAMLLK; IPAMTIAK; TLNDELEIIEGMK; VGEVIVTK; LSDGVAVLK; CIPALDSLTPANEDQK; NAGVEGSLIVEK; VTDALNATR; CEFQDAYVLLSEK	1.36536	VGGTSDVEVNEK; EIGNIISDAMK; IGIEIIK; LSDGVAVLK; VTDALNATR; TALLDAAGVASLLTTAEVVVTEIPK; CEFQDAYVLLSEK; LVQDVANNTNEEAGDGTTTATVLAR; IQEIIEQLDVTTSEYEK; GANPVEIR; IPAMTIAK; TLNDELEIIEGMK; VGEVIVTK; GIIDPTK; ISSIQSIVPALEIANAHR; TALLDAAGVASLLTTAEVVVTEIPKEEK; DDAMLLK; CIPALDSLTPANEDQK; NAGVEGSLIVEK; TVIIEQSWGSPK; AAVEEGIVLGGGCALLR; VGLQVVAVK
Pyruvate kinase PKM	KPYM	P14618	PKM	1.06127	NTGIICTIGPASR; LAPITSDPTEATAVGAVEASFK; CCSGAIIVLTK; LDIDSPPITAR; CDENILWLDYK; GSGTAEVELK; GDYPLEAVR; GADFLVTEVENGGSLGSK; GVNLPGAAVDLPAVSEK; DPVQEAWAEDVDLR; APIIAVTR; TATESFASDPILYRPVAVALDTK	1.47601	NTGIICTIGPASR; LAPITSDPTEATAVGAVEASFK; AEGSDVANAVLDGADCIMLSGETAK; CCSGAIIVLTK; GIFPVLCK; LDIDSPPITAR; GADFLVTEVENGGSLGSK; CDENILWLDYK; TATESFASDPILYRPVAVALDTK; GSGTAEVELK; ITLDNAYMEK; RFDEILEASDGIMVAR; EAEAAIYHLQLFEELR; FGVEQDVDMVFASFIR; IYVDDGLISLQVK; GVNLPGAAVDLPAVSEK; DPVQEAWAEDVDLR; APIIAVTR; GDYPLEAVR
Netrin receptor UNC5B	UNC5B	Q8IZJ1	UNC5B	nd		1.2425	NKPVELR
Calnexin	CALX	P27824	CANX	1.0317	AEEDEILNR; TPELNLDQFHDK; KPEDWDERPK	1.76105	AEEDEILNR; TPELNLDQFHDK; IPDPEAVKPDDWDEDAPAK; APVPTGEVYFADSFDR; KPEDWDERPK
DnaJ homolog subfamily B member 1	DNJB1	P25685	DNAJB1	NaN	EALCGCTVNVPTLDGR	nd
Protein LYRIC	LYRIC	Q86UE4	MTDH	NaN	EEAAAVPAAAPDDLALLK; EVDEGAWETK; LSSQISAGEEK	NaN	LSSQISAGEEK
AP-2 complex subunit beta	AP2B1	P63010	AP2B1	1.23767	LLSTDPVTAK; YPNKYESIIATLCENLDSLDEPDAR; LHDINAQMVEDQGFLDSLR; LQNNNVYTIAK; ECHLNADTVSSK; KPSETQELVQQVLSLATQDSDNPDLR; APEVSQYIYQVYDSILK; DVSSLFPDVVNCMQTDNLELK; DIPNENELQFQIK; QVFLATWK; IQPGNPNYTLSLK	1.28741	LLSTDPVTAK; FLELLPK; IQPGNPNYTLSLK; LQNNNVYTIAK; ECHLNADTVSSK; LAPPLVTLLSGEPEVQYVALR; APEVSQYIYQVYDSILK; DLIADSNPMVVANAVAALSEISESHPNSNLLDLNPQNINK; DVSSLFPDVVNCMQTDNLELK; YESIIATLCENLDSLDEPDAR; DIPNENELQFQIK; QVFLATWK
Ubiquitin-associated protein 2-like	UBP2L	Q14157	UBAP2L	1.02183	QRPQATAEQIR	NaN	IDLAVLLGK
Suppressor of IKBKE 1	SIKE1	Q9BRV8	SIKE1	NaN	LAQLELENK	nd
60S ribosomal protein L4	RL4	P36578	RPL4	0.987694	GPCIIYNEDNGIIK; KLDELYGTWR; IEEVPELPLVVEDK; EAVLLLK; NVTLPAVFK; AAAAAAALQAK; SGQGAFGNMCR; FCIWTESAFR	1.12958	GPCIIYNEDNGIIK; IEEVPELPLVVEDK; EAVLLLK; NVTLPAVFK; AAAAAAALQAK; NIPGITLLNVSK; FCIWTESAFR
Eukaryotic translation initiation factor 3 subunit A	EIF3A	Q14152	EIF3A	0.982962	ILQEHEQIK; TLSFGSDLNYATR	0.702933	ILQEHEQIK; VSTVFWK
Coactosin-like protein	COTL1	Q14019	COTL1	nd		1.16424	EFVISDR; ELEEDFIK; YDGSTIVPGEQGAEYQHFIQQCTDDVR; EVVQNFAK
Urokinase plasminogen activator surface receptor	UPAR	Q03405	PLAUR	0.800163	SGCNHPDLDVQYR	1.12205	SGCNHPDLDVQYR
La-related protein 1	LARP1	Q6PKG0	LARP1	2.42783	FQQVPTDALANK	nd
Proteasome subunit beta type-6	PSB6	P28072	PSMB6	1.5295	TTTGSYIANR	NaN	TTTGSYIANR
Cold-inducible RNA-binding protein	CIRBP	Q14011	CIRBP	1.17373	GFGFVTFENIDDAK; YGQISEVVVVK; DSYDSYATHNE	1.04042	GFGFVTFENIDDAK; YGQISEVVVVK; DSYDSYATHNE; LFVGGLSFDTNEQSLEQVFSK
V-type proton ATPase subunit B, brain isoform	VATB2	P21281	ATP6V1B2	nd		NaN	AVVQVFEGTSGIDAK
60S ribosomal protein L10a	RL10A	P62906	RPL10A	1.03093	YDAFLASESLIK; DTLYEAVR; AVDIPHMDIEALKK; AVDIPHMDIEALK; ILGPGLNK; FSVCVLGDQQHCDEAK; KYDAFLASESLIK	1.06785	YDAFLASESLIK; AVDIPHMDIEALKK; FPSLLTHNENMVAK; AVDIPHMDIEALK; ILGPGLNK; FSVCVLGDQQHCDEAK; KYDAFLASESLIK
V-type proton ATPase subunit C 1	VATC1	P21283	ATP6V1C1	nd		2.35043	IDCNLLEFK
Splicing factor 1	SF01	Q15637	SF1	NaN	FQRPGDPQSAQDK	NaN	SITNTTVCTK
60S ribosomal protein L24	RL24	P83731	RPL24	1.15578	VFQFLNAK; CESAFLSK; AITGASLADIMAK; VELCSFSGYK	1.06369	VELCSFSGYK; CESAFLSK; AITGASLADIMAK
60S ribosomal protein L38	RL38	P63173	RPL38	0.986986	DFLLTAR; QSLPPGLAVK; IEEIKDFLLTAR	1.00446	DFLLTAR; KIEEIKDFLLTAR; QSLPPGLAVK
Moesin	MOES	P26038	MSN	0.829689	FYPEDVSEELIQDITQR; EALLQASR; EGILNDDIYCPPETAVLLASYAVQSK; AQQELEEQTR; ALTSELANAR	1.03355	EGILNDDIYCPPETAVLLASYAVQSK; ISQLEMAR; EDAVLEYLK; EALLQASR; FYPEDVSEELIQDITQR; ALTSELANAR; ALELEQER; AQQELEEQTR
Signal-induced proliferation-associated protein 1	SIPA1	Q96FS4	SIPA1	NaN	AALEEEVR	NaN	LFTDPLALLGLPAEEPEPAFPPVLEPR; AALEEEVR
Myosin light chain kinase, smooth muscle	MYLK	Q15746	MYLK	1.08062	IIDEDFELTER; QQEVEQLDFR; VSDFYDIEER; QPGLGSQDVVSK; STSFNVQDLLPDHEYK; LQDVHVAEGK; DCAVIEGQDFVLQCSVR; SESQGTAPAFK; QISEGVEYIHK; SSTGSPTSPLNAEK; AGESVELFGK; LVQCVDAFEEK; DLEVVEGSAAR; TVTINTEQK	0.661861	LTILAAR; TLSEDDLK; IIDEDFELTER; FLLDCGIR; QQEVEQLDFR; VSDFYDIEER; QPGLGSQDVVSK; LQDVHVAEGK; SESQGTAPAFK; AGESVELFGK; LVQCVDAFEEK; APGLGVLSPSGEER; DLEVVEGSAAR; TVTINTEQK
40S ribosomal protein S30	RS30	P62861	FAU	1.04223	FVNVVPTFGK	0.929931	FVNVVPTFGK
Vitamin D-binding protein	VTDB	P02774	GC	NaN	ELSSFIDK	nd
Tight junction protein ZO-1	ZO1	Q07157	TJP1	0.922237	EISQDSLAAR; AIPVSPSAVEEDEDEDGHTVVATAR; EEAVLFLLDLPK; HEEQPAPGYDTHGR	0.925526	EISQDSLAAR; LAGGNDVGIFVAGVLEDSPAAK; FLKPVELR; EEAVLFLLDLPK
Nucleolin	NUCL	P19338	NCL	1.08899	TGISDVFAK; ALELTGLK; EAMEDGEIDGNK; VEGTEPTTAFNLFVGNLNFNK; GYAFIEFASFEDAK; GFGFVDFNSEEDAK; LELQGPR; NDLAVVDVR; KFGYVDFESAEDLEK; VTLDWAKPK; GLSEDTTEETLKESFDGSVR; FGYVDFESAEDLEK; SISLYYTGEK; ESFDGSVR; ALVATPGK; TLVLSNLSYSATEETLQEVFEK; GLSEDTTEETLK; EVFEDAAEIR; VFGNEIK	1.16045	TGISDVFAK; ALELTGLK; EAMEDGEIDGNK; VEGTEPTTAFNLFVGNLNFNK; SISLYYTGEK; GFGFVDFNSEEDAK; LELQGPR; NDLAVVDVR; KFGYVDFESAEDLEK; VTLDWAKPK; GLSEDTTEETLKESFDGSVR; FGYVDFESAEDLEK; GYAFIEFASFEDAK; ESFDGSVR; ALVATPGK; TLVLSNLSYSATEETLQEVFEK; GLSEDTTEETLK; EVFEDAAEIR
Rho GDP-dissociation inhibitor 1	GDIR1	P52565	ARHGDIA	nd		8.25768	SRFTDDDK
Serine hydroxymethyltransferase, mitochondrial	GLYM	P34897	SHMT2	0.504784	YYGGAEVVDEIELLCQR; AALEALGSCLNNK	1.40871	YSEGYPGK; TGLIDYNQLALTAR; LGAPALTSR; YYGGAEVVDEIELLCQR; SGLIFYR; VLELVSITANK; AALEALGSCLNNK
NADH dehydrogenase [ubiquinone] iron-sulfur protein 5	NDUS5	O43920	NDUFS5	0.415039	WLTIQSGEQPYK; IEYDDFVECLLR; FGLNIDR; EWIECAHGIGYTR	0.496211	EWIECAHGIGYTR; IEYDDFVECLLR; FGLNIDR; WLTIQSGEQPYK
Mitochondrial import inner membrane translocase subunit Tim8 B	TIM8B	Q9Y5J9	TIMM8B	NaN	TENCLSSCVDR	nd
Golgi apparatus protein 1	GSLG1	Q92896	GLG1	0.715201	FCENTQAGEGR; VAELSSDDFHLDR; IQVSELCK; AKDDSELEGQVISCLK; ALNEACESVIQTACK; LSSDCEDQIR; LDPVLYR	0.997306	FCENTQAGEGR; VAELSSDDFHLDR; AKDDSELEGQVISCLK; HTWSNNLAVLECLQDVR; LSSDCEDQIR; ALNEACESVIQTACK
Multifunctional protein ADE2	PUR6	P22234	PAICS	nd		NaN	EVYELLDSPGK
Serine/threonine-protein phosphatase PGAM5, mitochondrial	PGAM5	Q96HS1	PGAM5	NaN	AIETTDIISR	nd
Phosphate carrier protein, mitochondrial	MPCP	Q00325	SLC25A3	0.696103	FGFYEVFK; TVEALYK; IQTQPGYANTLR	0.980214	FGFYEVFK; IQTQPGYANTLR
CD2-associated protein	CD2AP	Q9Y5K6	CD2AP	nd		NaN	SVDFDSLTVR; GIGFGDIFK
Splicing factor 3B subunit 3	SF3B3	Q15393	SF3B3	0.817304	IVILEYQPSK; WVTTASLLDYDTVAGADK; NENQLIIFADDTYPR; TVLDPVTGDLSDTR; FGNICVVR	1.19461	FGNICVVR; TVLDPVTGDLSDTR; IVPGQFLAVDPK
Septin-2	SEPT2	Q15019	SEPT2	1.07259	YLHDESGLNR; TVQIEASTVEIEER; TIISYIDEQFER; LYPWGVVEVENPEHNDFLK; ADTLTLK	1.27194	LTVVDTPGYGDAINCR; STLINSLFLTDLYPER; TIISYIDEQFER; LYPWGVVEVENPEHNDFLK; ADTLTLK; YLHDESGLNR; TVQIEASTVEIEER
Multifunctional procollagen lysine hydroxylase and glycosyltransferase LH3	PLOD3	O60568	PLOD3	0.343993	LYLDPGLR; TLGLGEEWR; LVGPEEALSPGEAR; QVGYEDQWLQLLR; IFQNLNGALDEVVLK	1.28859	LYLDPGLR
C-terminal-binding protein 1	CTBP1	Q13363	CTBP1	NaN	IGSGFDNIDIK	NaN	IGSGFDNIDIK
Receptor of activated protein C kinase 1	RACK1	P63244	RACK1	1.00242	IWDLEGK; IIVDELK; YTVQDESHSEWVSCVR; DETNYGIPQR	0.905675	DGQAMLWDLNEGK; LWNTLGVCK; YTVQDESHSEWVSCVR; IIVDELK; HLYTLDGGDIINALCFSPNR; FSPNSSNPIIVSCGWDK; DVLSVAFSSDNR; LWDLTTGTTTR; DETNYGIPQR
Brain acid soluble protein 1	BASP1	P80723	BASP1	1.1808	AEPPKAPEQEQAAPGPAAGGEAPK; APEQEQAAPGPAAGGEAPK; AQGPAASAEEPKPVEAPAANSDQTVTVKE; ESEPQAAAEPAEAK; KTEAPAAPAAQETK; ETPAATEAPSSTPK; SDGAPASDSKPGSSEAAPSSK; TEAPAAPAAQETK; AAEAAAAPAESAAPAAGEEPSKEEGEPK; AQGPAASAEEPKPVEAPAANSDQTVTVK	1.65486	AEPPKAPEQEQAAPGPAAGGEAPK; APEQEQAAPGPAAGGEAPK; ESEPQAAAEPAEAK; KTEAPAAPAAQETK; ETPAATEAPSSTPK; SDGAPASDSKPGSSEAAPSSK; TEAPAAPAAQETK; AQGPAASAEEPKPVEAPAANSDQTVTVK
RNA-binding protein 14	RBM14	Q96PK6	RBM14	NaN	VIECDVVK; LAELSDYR; LPDAHSDYAR	NaN	VIECDVVK
Magnesium transporter NIPA4	NIPA4	Q0D2K0	NIPAL4	0.855804	GLGITIK	0.847098	GLGITIK
Isoform 3 of LIM domain only protein 7	LMO7	Q8WWI1-3	LMO7	0.948143	SWASPVYTEADGTFSR	nd
Calponin-2	CNN2	Q99439	CNN2	NaN	GLQSGVDIGVK	0.843026	LQPGSVPK
Fibroblast growth factor 2	FGF2	P09038	FGF2	NaN	LESNNYNTYR	nd
Actin-related protein 2/3 complex subunit 1B	ARC1B	O15143	ARPC1B	0.755972	FAVGSGSR; EVEERPAPTPWGSK; SLESALK; ASSEGGTAAGAGLDSLHK; EHNGQVTGIDWAPESNR; NSVSQISVLSGGK	0.87535	NSVSQISVLSGGK; ASSEGGTAAGAGLDSLHK; FAVGSGSR; SLESALK
Actin-related protein 2/3 complex subunit 2	ARPC2	O15144	ARPC2	0.720296	DDETMYVESK; DSIVHQAGMLK; VFMQEFK; IIEETLALK; YFQFQEEGK; NCFASVFEK; ELQAHGADELLK; DDDDVVIGK; DNTINLIHTFR	0.972279	DDETMYVESK; DSIVHQAGMLK; VFMQEFK; IIEETLALK; YFQFQEEGK; DNTINLIHTFR; NCFASVFEK; DDDDVVIGK; DTDAAVGDNIGYITFVLFPR
Actin-related protein 2/3 complex subunit 3	ARPC3	O15145	ARPC3	0.807892	DTDIVDEAIYYFK; VFDPQNDKPSK; AYLQQLR	0.999558	DTDIVDEAIYYFK; PAYHSSLMDPDTK; VFDPQNDKPSK; AYLQQLR
Prefoldin subunit 2	PFD2	Q9UHV9	PFDN2	nd		1.84778	GAVSAEQVIAGFNR
Nuclear migration protein nudC	NUDC	Q9Y266	NUDC	1.42537	LVSSDPEINTK; VEESSWLIEDGK; LQLEIDQK	1.33582	LVSSDPEINTK; ELTDEEAER; GQPAIIDGELYNEVK
RuvB-like 1	RUVB1	Q9Y265	RUVBL1	NaN	LDPSIFESLQK	NaN	QAASGLVGQENAR
Phospholipid phosphatase 3	PLPP3	O14495	PLPP3	0.928586	EILSPVDIIDR	nd
Eukaryotic translation initiation factor 3 subunit L	EIF3L	Q9Y262	EIF3L	1.0057	LAGFLDLTEQEFR; VSSDVIDQK; VYELQASR	0.850241	LAGFLDLTEQEFR; YGDFFIR; VSSDVIDQK
Nexilin	NEXN	Q0ZGT2	NEXN	0.641137	LEINFEELLK; AIDLEIK	0.720893	LEINFEELLK
Constitutive coactivator of PPAR-gamma-like protein 1	F120A	Q9NZB2	FAM120A	0.993826	AEGSSTASSGSQLAEGK; NQAAIQGRPPYAASAEEVAK; LYEPDQLQELK; SPQTPELVEALAFR; SQGGVQPIPSQGGK	nd
ATP-dependent RNA helicase A	DHX9	Q08211	DHX9	0.946826	LAQFEPSQR; QPAIISQLDPVNER; DINTDFLLVVLR; FSDHVALLSVFQAWDDAR; TTQVPQFILDDFIQNDR; DFVNYLVR; SSVNCPFSSQDMK; AAMEALVVEVTK; LNQYFQK; KVFDPVPVGVTK; MGGEEAEIR; ELDALDANDELTPLGR; AIEPPPLDAVIEAEHTLR; VFDPVPVGVTK; AAECNIVVTQPR; EGETVEPYK; ISAVSVAER; NELMYQLEQDHDLQAILQER; LGGIGQFLAK; VQSDGQIVLVDDWIK; AENNSEVGASGYGVPGPTWDR; YPSPFFVFGEK; GISHVIVDEIHER	1.23512	DVVQAYPEVR; LAQFEPSQR; QPAIISQLDPVNER; LETHMTPEMFR; VFDPVPVGVTK; FSDHVALLSVFQAWDDAR; TTQVPQFILDDFIQNDR; DFVNYLVR; SSVNCPFSSQDMK; EGETVEPYK; AAMEALVVEVTK; LNQYFQK; MTPSYEIR; MGGEEAEIR; ELDALDANDELTPLGR; AIEPPPLDAVIEAEHTLR; DKDDDGGEDDDANCNLICGDEYGPETR; DINTDFLLVVLR; ISAVSVAER; LGGIGQFLAK; VQSDGQIVLVDDWIK; AENNSEVGASGYGVPGPTWDR; YPSPFFVFGEK; AAECNIVVTQPR
26S proteasome regulatory subunit 10B	PRS10	P62333	PSMC6	nd		1.81098	ALQSVGQIVGEVLK; VVSSSIVDK
cAMP-dependent protein kinase type I-alpha regulatory subunit	KAP0	P10644	PRKAR1A	1.32177	NVLFSHLDDNER; LTVADALEPVQFEDGQK; VSILESLDK	1.90479	NVLFSHLDDNER; LTVADALEPVQFEDGQK; VSILESLDK
Myosin-10	MYH10	P35580	MYH10	1.50306	SLEAEILQLQEELASSER	nd
Nuclear RNA export factor 1	NXF1	Q9UBU9	NXF1	NaN	SDPDLVAQNIDVVLNR	nd
Striatin-interacting protein 1	STRP1	Q5VSL9	STRIP1	2.6705	KPAISLADSTDLR; LLDGLEVTAR; QDNLDAFNER; AHSNPDFLPVDNCLQSVLGQR; WTELDTNQHR; AAAGLLPGGK	3.45894	YTSIAEVQAQMEEEYLR; KPAISLADSTDLR; LLDGLEVTAR; VDLPEDFQMNYDLWLER; QDNLDAFNER; WTELDTNQHR; AAAGLLPGGK
Eukaryotic translation initiation factor 3 subunit E	EIF3E	P60228	EIF3E	NaN	QLQAETEPIVK	NaN	QLQAETEPIVK; YLTTAVITNK
Tight junction protein ZO-2	ZO2	Q9UDY2	TJP2	0.93075	SSEPVQHEESIR; VNTQDFR; EDAVLYLLEIPK; LAGGNDVGIFVAGIQEGTSAEQEGLQEGDQILK	0.956999	SSEPVQHEESIR; VNTQDFR
cAMP-dependent protein kinase catalytic subunit alpha	KAPCA	P17612	PRKACA	0.841347	WESPAQNTAHLDQFER	NaN	ILQAVNFPFLVK
Signal recognition particle receptor subunit alpha	SRPRA	P08240	SRPRA	NaN	NQGFDVVLVDTAGR	nd
60S ribosomal protein L27a	RL27A	P46776	RPL27A	1.11344	LWTLVSEQTR; NQSFCPTVNLDK; TGAAPIIDVVR	0.934488	LWTLVSEQTR; NQSFCPTVNLDK; TGAAPIIDVVR
14-3-3 protein gamma	1433G	P61981	YWHAG	1.00884	TAFDDAIAELDTLNEDSYK; YLAEVATGEK; NVTELNEPLSNEER	1.24454	TAFDDAIAELDTLNEDSYK; YLAEVATGEK; ELEAVCQDVLSLLDNYLIK; NVTELNEPLSNEER
Cytochrome c oxidase subunit 6C	COX6C	P09669	COX6C	0.37707	AGIFQSVK; AYADFYR	0.510173	AGIFQSVK; AYADFYR
Sequestosome-1	SQSTM	Q13501	SQSTM1	1.06045	NYDIGAALDTIQYSK; DHRPPCAQEAPR	nd
Poly(U)-binding-splicing factor PUF60	PUF60	Q9UHX1	PUF60	NaN	VYVGSIYYELGEDTIR	1.40858	IYVASVHQDLSDDDIK
Transcriptional activator protein Pur-beta	PURB	Q96QR8	PURB	1.17392	GGGEQETQELASK; VSEVKPSYR	1.00544	GGGEQETQELASK; VSEVKPSYR
Thioredoxin-related transmembrane protein 1	TMX1	Q9H3N1	TMX1	nd		NaN	DFINFISDK
Mitochondrial import receptor subunit TOM22 homolog	TOM22	Q9NS69	TOMM22	0.274307	LQMEQQQQLQQR; GDAEKPEEELEEDDDEELDETLSER	0.299245	LWGLTEMFPER; LQMEQQQQLQQR
26S proteasome non-ATPase regulatory subunit 8	PSMD8	P48556	PSMD8	nd		1.49803	VAEFHTELER
Vasodilator-stimulated phosphoprotein	VASP	P50552	VASP	nd		1.0394	QQPGPSEHIER; DESANQEEPEAR; VKEEIIEAFVQELR
5'-nucleotidase	5NTD	P21589	NT5E	0.986689	LDVLCTK; ETPFLSNPGTNLVFEDEITALQPEVDK; TIVYLDGSSQSCR; IIALGHSGFEMDK; YPFIVTSDDGR; GPLASQISGLYLPYK; VIYPAVEGR; VLPVGDEVVGIVGYTSK; VPSYDPLK	1.39475	TIVYLDGSSQSCR; ETPFLSNPGTNLVFEDEITALQPEVDK; LDVLCTK; YDAMALGNHEFDNGVEGLIEPLLK; YPFIVTSDDGR; GPLASQISGLYLPYK; VIYPAVEGR; VLPVGDEVVGIVGYTSK; VPSYDPLK
Fascin	FSCN1	Q16658	FSCN1	0.679846	LSCFAQTVSPAEK; YSVQTADHR; YLTAEAFGFK; YLAADKDGNVTCER; ASAETVDPASLWEY; YLAPSGPSGTLK	0.983125	LSCFAQTVSPAEK; QIWTLEQPPDEAGSAAVCLR; YSVQTADHR; YLTAEAFGFK; DVPWGVDSLITLAFQDQR; YLAADKDGNVTCER; YFGGTEDR; FLIVAHDDGR; YLAPSGPSGTLK
Peptidyl-prolyl cis-trans isomerase A	PPIA	P62937	PPIA	1.43404	FEDENFILK; KITIADCGQLE; VSFELFADK	1.51289	FEDENFILK; KITIADCGQLE; VSFELFADK
NADH dehydrogenase [ubiquinone] 1 alpha subcomplex subunit 5	NDUA5	Q16718	NDUFA5	nd		0.562409	ILDVLEEIPK; KLEDQLQGGQLEEVILQAEHELNLAR
Eukaryotic translation initiation factor 2 subunit 3	IF2G	P41091	EIF2S3	1.29414	VGQEIEVRPGIVSK; LDDPSCPRPECYR	1.03692	VGQEIEVRPGIVSK; LDDPSCPRPECYR
MICOS complex subunit MIC60	MIC60	Q16891	IMMT	0.270354	ELDSITPEVLPGWK	0.262295	YSTSGSSGLTTGK; ERPPEEVAAR
Mitogen-activated protein kinase kinase kinase kinase 4	M4K4	O95819	MAP4K4	1	SSSSFTPFIDPR; GNTLKEDWIAYISR; VMDVTEDEEEEIKLEINMLK; SLVDIDLSSLR; DSPLQGSGQQNSQAGQR; AVEDVRPPHK; EVFRPLKPADLTALAK; FFSFIEGCLVK; LEINMLK; RDSPLQGSGQQNSQAGQR; VYPLINR; QLQQEQAYLLSLQHDHR; TTSRSPVLSR; LVPRPGSGSSSGSSNSGSQPGSHPGSQSGSGER; SNQTMGWGEK; RQQLLQEQQLR; AHYEPADR; NYMQRPSTEQLLK; HLEVLQQQLLQEQAMLLECR; GSVVNVNPTNTRPQSDTPEIR; QGWTTVGDLEGCVHYK; QQLLQEQQLR; EDWIAYISR; EGTLIVR; AASSLNLSNGETESVK; GEKDE…	1	SSSSFTPFIDPR; GNTLKEDWIAYISR; SDLWSCGITAIEMAEGAPPLCDMHPMR; SLVDIDLSSLR; DSPLQGSGQQNSQAGQR; AVEDVRPPHK; EVFRPLKPADLTALAK; FFSFIEGCLVK; LEINMLK; RDSPLQGSGQQNSQAGQR; SPPGHDDQLWLVMEFCGAGSITDLVK; VYPLINR; QLQQEQAYLLSLQHDHR; TTSRSPVLSR; LVPRPGSGSSSGSSNSGSQPGSHPGSQSGSGER; VMDVTEDEEEEIKLEINMLK; SNQTMGWGEK; RQQLLQEQQLR; AHYEPADR; SGGSSQVYFMTLGR; NYMQRPSTEQLLK; HLEVLQQQLLQEQAMLLECR; GSVVNVNPTNTRPQSDTPEIR; …
BAG family molecular chaperone regulator 2	BAG2	O95816	BAG2	1.38712	LLESLDQLELR	0.629103	LLESLDQLELR
Far upstream element-binding protein 2	FUBP2	Q92945	KHSRP	0.572294	VQISPDSGGLPER; IGGGIDVPVPR	1.12611	VQISPDSGGLPER; IGGGIDVPVPR
Protein disulfide-isomerase A6	PDIA6	Q15084	PDIA6	0.905424	GESPVDYDGGR; TGEAIVDAALSALR; GSFSEQGINEFLR; NSYLEVLLK; GSTAPVGGGAFPTIVER; ALDLFSDNAPPPELLEIINEDIAK; DGELPVEDDIDLSDVELDDLGKDEL	1.25706	TGEAIVDAALSALR; GSFSEQGINEFLR; GESPVDYDGGR; LAAVDATVNQVLASR; GSTAPVGGGAFPTIVER; DVIELTDDSFDK; ALDLFSDNAPPPELLEIINEDIAK; NLEPEWAAAASEVK; NSYLEVLLK; DGELPVEDDIDLSDVELDDLGKDEL
Coiled-coil domain-containing protein 50	CCD50	Q8IVM0	CCDC50	1.01764	LVQHDLQVAK; LAIEAER; AAQVAQDEEIAR	1.09507	LVQHDLQVAK; LAIEAER
E3 ubiquitin/ISG15 ligase TRIM25	TRI25	Q14258	TRIM25	nd		NaN	FDTIYQILLK
Calcineurin B homologous protein 1	CHP1	Q99653	CHP1	0.76424	IPELAINPLGDR; IINAFFPEGEDQVNFR; DELLQVLR	1.16692	IPELAINPLGDR; ETGFSHSQITR; IINAFFPEGEDQVNFR; DELLQVLR
Zinc finger CCCH domain-containing protein 3	ZC3H3	Q8IXZ2	ZC3H3	nd		11.0414	MVKSVGSVGDSPR
60S ribosomal protein L28	RL28	P46779	RPL28	1.14595	TVGVEPAADGK; QTYSTEPNNLK	1.02515	TVGVEPAADGK; QTYSTEPNNLK
TAR DNA-binding protein 43	TADBP	Q13148	TARDBP	nd		1.35833	TSDLIVLGLPWK
Protein arginine N-methyltransferase 1	ANM1	Q99873	PRMT1	1.05936	WLAPDGLIFPDR; QLVTNACLIK; VIGIECSSISDYAVK; LDHVVTIIK; GQLCELSCSTDYR	1.06385	WLAPDGLIFPDR; QLVTNACLIK; VIGIECSSISDYAVK; GQLCELSCSTDYR; TGFSTSPESPYTHWK
Protein S100-A9	S10A9	P06702	S100A9	nd		9.79974	DLQNFLKK; LGHPDTLNQGEFK; NIETIINTFHQYSVK
NHP2-like protein 1	NH2L1	P55769	SNU13	1.31613	LLDLVQQSCNYK; QQIQSIQQSIER	1.80455	LLDLVQQSCNYK; QQIQSIQQSIER
Protein XRP2	XRP2	O75695	RP2	nd		1.4481	APDFLPLLNK
Heterogeneous nuclear ribonucleoprotein H2	HNRH2	P55795	HNRNPH2	NaN	SNSVEMDWVLK	nd
Caldesmon	CALD1	Q05682	CALD1	0.749491	MPEDGLSDDKKPFK; RGETESEEFEK; TTTTNTQVEGDDEAAFLER; EAEGAPQVEAGK; EFDPTITDASLSLPSR; QQEAALELEELK; LEQYTSAIEGTK; INEWLTK; GNVFSSPTAAGTPNK; MQNDTAENETTEKEEK; YEIEETETVTK; QKQEEESLGQVTDQVEVNAQNSVPDEEAK; EAEGAPQVEAGKR; SAKPTKPAASDLPVPAEGVR; VLEEEEQR; GETESEEFEK; QQEAALELEELKK	0.756011	MPEDGLSDDKKPFK; TTTTNTQVEGDDEAAFLER; EAEGAPQVEAGK; EFDPTITDASLSLPSR; QQEAALELEELK; LEQYTSAIEGTK; GNVFSSPTAAGTPNK; MQNDTAENETTEKEEK; VLEEEEQR; GETESEEFEK; QQEAALELEELKK; EAEGAPQVEAGKR; SAKPTKPAASDLPVPAEGVR; INEWLTK; YEIEETETVTK; RGETESEEFEK
Pyruvate dehydrogenase E1 component subunit beta, mitochondrial	ODPB	P11177	PDHB	nd		NaN	DFLIPIGK
28S ribosomal protein S29, mitochondrial	RT29	P51398	DAP3	NaN	FDQPLEASTWLK	nd
U1 small nuclear ribonucleoprotein A	SNRPA	P09012	SNRPA	1.08805	EVSSATNALR	1.28559	EVSSATNALR
Zinc finger RNA-binding protein	ZFR	Q96KR1	ZFR	NaN	AISSASSPQSPGDALR	NaN	AISSASSPQSPGDALR
Probable 28S rRNA (cytosine(4447)-C(5))-methyltransferase	NOP2	P46087	NOP2	nd		NaN	NTGVILANDANAER
RuvB-like 2	RUVB2	Q9Y230	RUVBL2	1.00188	TQGFLALFSGDTGEIK	NaN	AVLIAGQPGTGK; FVQCPDGELQK
40S ribosomal protein S3a	RS3A	P61247	RPS3A	1.08197	ACQSIYPLHDVFVR; TTDGYLLR; VVDPFSK; LITEDVQGK; LIPDSIGK; VFEVSLADLQNDEVAFR; LMELHGEGSSSGK; ADGYEPPVQESV	0.922728	ACQSIYPLHDVFVR; TTDGYLLR; VVDPFSK; LITEDVQGK; NCLTNFHGMDLTR; VFEVSLADLQNDEVAFR; LMELHGEGSSSGK; LFCVGFTK; ADGYEPPVQESV
Cullin-3	CUL3	Q13618	CUL3	NaN	NNSGLSFEELYR	nd
Protein arginine N-methyltransferase 5	ANM5	O14744	PRMT5	1.20946	AAILPTSIFLTNK; GPLVNASLR; LSPWIRPDSK; YSQYQQAIYK; GYEDYLQSPLQPLMDNLESQTYEVFEKDPIK; ADIIVSELLGSFADNELSPECLDGAQHFLK; DPMIDNNR; VPLVAPEDLR; VPEEEKDTNVQVLMVLGAGR; DDIIENAPTTHTEEYSGEEK; DDGVSIPGEYTSFLAPISSSK; GYEDYLQSPLQPLMDNLESQTYEVFEK; DLNCVPEIADTLGAVAK; TLCDYSK; EGQTICVR; SDLLLSGR; VWYEWAVTAPVCSAIHNPTGR; GFPVLSK; EWVAPEK; WLGEPIK; EKDRDPEAQFEMPYVVR; DRDPEAQFEMPYVVR; DWNTLIVGK	1.20586	AAILPTSIFLTNK; GPLVNASLR; LSPWIRPDSK; YSQYQQAIYK; GYEDYLQSPLQPLMDNLESQTYEVFEKDPIK; ADIIVSELLGSFADNELSPECLDGAQHFLK; DPMIDNNR; VPLVAPEDLR; VPEEEKDTNVQVLMVLGAGR; DDIIENAPTTHTEEYSGEEK; DDGVSIPGEYTSFLAPISSSK; GYEDYLQSPLQPLMDNLESQTYEVFEK; DLNCVPEIADTLGAVAK; TLCDYSK; EGQTICVR; SDLLLSGR; VWYEWAVTAPVCSAIHNPTGR; GFPVLSK; WLGEPIK; EKDRDPEAQFEMPYVVR; DRDPEAQFEMPYVVR; DWNTLIVGK; QGFDFLCMPVFHPR
Myosin-9	MYH9	P35579	MYH9	1.1361	DELADEIANSSGK; EQEVNILK; KVEAQLQELQVK; SGFEPASLK; NMDPLNDNIATLLHQSSDK; LEGDSTDLSDQIAELQAQIAELK; DLEAHIDSANK; ALEQQVEEMK; ELESQISELQEDLESER; FVSELWK; EQLEEEEEAK; KLEEEQIILEDQNCK; EQADFAIEALAK; DVLLQVDDER; ALELDSNLYR; QLEEAEEEAQR; LQQELDDLLVDLDHQR; KLEGDSTDLSDQIAELQAQIAELK; LQVELDNVTGLLSQSDSK; IAQLEEELEEEQGNTELINDR; TDLLLEPYNK; DLEGLSQR; ASITALEAK; HSQAVEELAEQLEQTK; LVWVPSDK; VVFQEFR; DFSALESQLQDTQ…	1.22789	DELADEIANSSGK; EQEVNILK; NMDPLNDNIATLLHQSSDK; LEGDSTDLSDQIAELQAQIAELK; DLEAHIDSANK; ALEQQVEEMK; IIGLDQVAGMSETALPGAFK; ELESQISELQEDLESER; RGDLPFVVPR; FVSELWK; EQLEEEEEAK; KLEEEQIILEDQNCK; EQADFAIEALAK; DVLLQVDDER; ALELDSNLYR; QLEEAEEEAQR; LQQELDDLLVDLDHQR; KLEGDSTDLSDQIAELQAQIAELK; ANLQIDQINTDLNLER; VVFQEFR; LQVELDNVTGLLSQSDSK; TDLLLEPYNK; ASITALEAK; MQQNIQELEEQLEEEESAR; VSHLLGINVTDFTR; DFSALESQLQ…
Galectin-1	LEG1	P09382	LGALS1	0.760702	LPDGYEFK; SFVLNLGK; FNAHGDANTIVCNSK; DGGAWGTEQR; DSNNLCLHFNPR; LNLEAINYMAADGDFK	0.751487	LPDGYEFK; SFVLNLGK; FNAHGDANTIVCNSK; DGGAWGTEQR; DSNNLCLHFNPR; LNLEAINYMAADGDFK
Guanine nucleotide-binding protein subunit beta-4	GBB4	Q9HAV0	GNB4	0.922697	TFVSGACDASSK	1.01053	TFVSGACDASSK; LLLAGYDDFNCNVWDTLK
GrpE protein homolog 1, mitochondrial	GRPE1	Q9HAV7	GRPEL1	0.954698	DLLEVADVLEK	1.41264	DLLEVADVLEK
60S ribosomal protein L30	RL30	P62888	RPL30	1.00889	TGVHHYSGNNIELGTACGK; VCTLAIIDPGDSDIIR; LVILANNCPALR; SLESINSR	1.08801	TGVHHYSGNNIELGTACGK; VCTLAIIDPGDSDIIR; LVILANNCPALR; SLESINSR
40S ribosomal protein S23	RS23	P62266	RPS23	1.05122	ITAFVPNDGCLNFIEENDEVLVAGFGR; GHAVGDIPGVR	0.922293	ITAFVPNDGCLNFIEENDEVLVAGFGR; GHAVGDIPGVR
DnaJ homolog subfamily C member 8	DNJC8	O75937	DNAJC8	nd		1.35765	QREEEIEAQEK
Ezrin	EZRI	P15311	EZR	0.757407	FYPEDVAEELIQDITQK; IALLEEAR	0.889032	SGYLSSER; FYPEDVAEELIQDITQK; IALLEEAR
Dynactin subunit 3	DCTN3	O75935	DCTN3	NaN	ALLEEYNK	1.04846	QFVQWDELLCQLEAATQVKPAEE; ALLEEYNK
TOM1-like protein 2	TM1L2	Q6ZVM7	TOM1L2	0.840776	QSSEGIPVAQPSVMDDIEVWLR; VSNEEVTEELLHVNDDLNNVFLR; ATDGSLQSEDWTLNMEICDIINETEEGPK; SEDALFAL; TVTYEDPQAVGGLASALDNR	0.989033	DFIDSVLVK; TVTYEDPQAVGGLASALDNR; VLALIQAWADAFR; SEDALFAL; VSNEEVTEELLHVNDDLNNVFLR; QSSEGIPVAQPSVMDDIEVWLR
40S ribosomal protein S20	RS20	P60866	RPS20	0.902219	VCADLIR; LIDLHSPSEIVK; TPVEPEVAIHR	1.06162	VCADLIR; LIDLHSPSEIVK; TPVEPEVAIHR
Oxysterol-binding protein-related protein 8	OSBL8	Q9BZF1	OSBPL8	1.21545	GIELGDIQSSIESIK	nd
Caveolin-1	CAV1	Q03135	CAV1	nd		0.784678	IDFEDVIAEPEGTHSFDGIWK
26S proteasome regulatory subunit 6B	PRS6B	P43686	PSMC4	1.0865	ENAPAIIFIDEIDAIATK	2.23425	ENAPAIIFIDEIDAIATK
Proteasome activator complex subunit 1	PSME1	Q06323	PSME1	NaN	IEDGNNFGVAVQEK	NaN	IEDGNNFGVAVQEK
Serine/arginine-rich splicing factor 7	SRSF7	Q16629	SRSF7	0.941221	RPFDPNDR; VYVGNLGTGAGK; VELSTGMPR	1.0464	VYVGNLGTGAGK; VELSTGMPR
U4/U6 small nuclear ribonucleoprotein Prp4	PRP4	O43172	PRPF4	NaN	QINVSTDDSEVK	NaN	QINVSTDDSEVK
Isoform 7 of Tropomyosin alpha-3 chain	TPM3	P06753-7	TPM3	0.977345	MLDQTLLDLNEM; TIDDLEDK; TIDDLEDKLK	0.907571	MLDQTLLDLNEM; TIDDLEDK; TIDDLEDKLK
MOB kinase activator 2	MOB2	Q70IA6	MOB2	NaN	LVTDEDVFPTK	nd
Protein furry homolog-like	FRYL	O94915	FRYL	1.20133	EAAEQWLDDCKR; YSSSSGGSYEEEK; TYGGDTGSPEISFTK	3.6166	LSLIGDR; TCIAAIPR; FGEITNEAVSFLGDSLQR; ELIEELHPIIK
D-3-phosphoglycerate dehydrogenase	SERA	O43175	PHGDH	2.35214	DLPLLLFR; AGTGVDNVDLEAATR; TLGILGLGR; ILQDGGLQVVEK; QADVNLVNAK; VLISDSLDPCCR; GTIQVITQGTSLK	2.01488	DLPLLLFR; AGTGVDNVDLEAATR; TLGILGLGR; ILQDGGLQVVEK; QADVNLVNAK; VLISDSLDPCCR; GGIVDEGALLR; GTIQVITQGTSLK
Thioredoxin	THIO	P10599	TXN	1.20749	EKLEATINELV; TAFQEALDAAGDK; LEATINELV	1.38793	TAFQEALDAAGDK; CMPTFQFFK; LEATINELV
DnaJ homolog subfamily A member 2	DNJA2	O60884	DNAJA2	1.24485	NVLCSACSGQGGK; EISFAYEVLSNPEK; FDVQFPENNWINPDK; ITFTGEADQAPGVEPGDIVLLLQEK; VIEPGCVR; ILEVHVDK	NaN	ILEVHVDK
Eukaryotic translation initiation factor 6	IF6	P56537	EIF6	1.50822	LNEAQPSTIATSMR; ETEEILADVLK; TSIEDQDELSSLLQVPLVAGTVNR; DSLIDSLT	1.00415	LNEAQPSTIATSMR; TSIEDQDELSSLLQVPLVAGTVNR; DSLIDSLT; ASFENNCEIGCFAK
S-adenosylmethionine synthase isoform type-2	METK2	P31153	MAT2A	NaN	FVIGGPQGDAGLTGR; ELLEIVK	1.24286	FVIGGPQGDAGLTGR; ELLEIVK
Importin-7	IPO7	O95373	IPO7	NaN	GIDQCIPLFVEAALER	0.709167	GIDQCIPLFVEAALER
NADH dehydrogenase [ubiquinone] iron-sulfur protein 2, mitochondrial	NDUS2	O75306	NDUFS2	0.338327	LDELEELLTNNR; APGFAHLAGLDK	0.581624	TYLQALPYFDR; LDELEELLTNNR; APGFAHLAGLDK; IIAQCLNK
60S ribosomal protein L34	RL34	P49207	RPL34	1.00216	AFLIEEQK	1.14363	AFLIEEQK
Coatomer subunit delta	COPD	P48444	ARCN1	1.12617	ENVNLAQIR; IEGLLAAFPK; NSNILEDLETLR	0.91732	ENVNLAQIR; IEGLLAAFPK; NSNILEDLETLR
Isoform 5 of Caldesmon	CALD1	Q05682-5	CALD1	0.667301	GSIGENQIK; GSIGENQIKDEK; RGSIGENQIKDEK	0.857195	GSIGENQIKDEK; RGSIGENQIKDEK
Protein transport protein Sec23A	SC23A	Q15436	SEC23A	NaN	HFEALANR	nd
Heterogeneous nuclear ribonucleoprotein U-like protein 1	HNRL1	Q9BUJ2	HNRNPUL1	0.859775	NYILDQTNVYGSAQR; INEEISVK	NaN	INEEISVK
NADH dehydrogenase [ubiquinone] iron-sulfur protein 8, mitochondrial	NDUS8	O00217	NDUFS8	nd		1.14074	TLLWTELFR
A-kinase anchor protein 2	AKAP2	Q9Y2D5	AKAP2	1.04467	LWAEDGEFTSAR; DDDHGILDQFSR; AVLTVVK	NaN	LWAEDGEFTSAR; AVLTVVK; QVLQSTQSPR; DGEFTLTTLK
Gamma-adducin	ADDG	Q9UEY8	ADD3	1.23934	TLDNLGYR; VNIIGEVVDQGSTNLK; SDVEIPATVTAFSFEDDTVPLSPLK	1.1028	GLSFSEATASNLVK; VGEIEFEGLMR; VNIIGEVVDQGSTNLK; INENDPEYIR; EQDHIIIIPR
Non-POU domain-containing octamer-binding protein	NONO	Q15233	NONO	0.822078	AGEVFIHK; RMEELHNQEVQK; NLPQYVSNELLEEAFSVFGQVER; VELDNMPLR; ALIEMEK	1.20424	AGEVFIHK; RMEELHNQEVQK; VELDNMPLR; ALIEMEK
Sec1 family domain-containing protein 2	SCFD2	Q8WU76	SCFD2	10.9726	HKEAVMEVR	nd
Tropomyosin alpha-3 chain	TPM3	P06753	TPM3	1.03157	TIDDLEDELYAQK; KLVIIEGDLER; YSQKEDKYEEEIK; LVIIEGDLER	0.857918	KLVIIEGDLER; YSQKEDKYEEEIK; LVIIEGDLER
Interleukin enhancer-binding factor 3	ILF3	Q12906	ILF3	0.82664	LFPDTPLALDANK; VPTWGPLR; EDITQSAQHALR; AYAALAALEK; VLAGETLSVNDPPDVLDR; VLQDMGLPTGAEGR; LAAFGQLHK; EKPTTALLDK; VLGMDPLPSK; CLAALASLR; SCVIVIR; GDLDLELVLLCK; EATDAIGHLDR	1.08016	LFPDTPLALDANK; VPTWGPLR; EDITQSAQHALR; AYAALAALEK; VLAGETLSVNDPPDVLDR; VLQDMGLPTGAEGR; LAAFGQLHK; EKPTTALLDK; IFVNDDR; VLGMDPLPSK; CLAALASLR; GDLDLELVLLCK; EATDAIGHLDR
Interleukin enhancer-binding factor 2	ILF2	Q12905	ILF2	0.882366	CLQILAAGLFLPGSVGITDPCESGNFR; ILPTLEAVAALGNK; INNVIDNLIVAPGTFEVQIEEVR; WFEENASQSTVK; ILGQEGDASYLASEISTWDGVIVTPSEK; NQDLAPNSAEQASILSLVTK; VKPAPDETSFSEALLK	1.04078	VLQSALAAIR; ILPTLEAVAALGNK; INNVIDNLIVAPGTFEVQIEEVR; WFEENASQSTVK; ILGQEGDASYLASEISTWDGVIVTPSEK; NQDLAPNSAEQASILSLVTK; VKPAPDETSFSEALLK
Voltage-dependent anion-selective channel protein 1	VDAC1	P21796	VDAC1	0.390521	VTQSNFAVGYK; YQIDPDACFSAK; SENGLEFTSSGSANTETTK; TDEFQLHTNVNDGTEFGGSIYQK; WTEYGLTFTEK; WNTDNTLGTEITVEDQLAR; LTFDSSFSPNTGK	0.440961	VTQSNFAVGYK; YQIDPDACFSAK; LTFDSSFSPNTGK; TDEFQLHTNVNDGTEFGGSIYQK; WTEYGLTFTEK; WNTDNTLGTEITVEDQLAR; EHINLGCDMDFDIAGPSIR; SENGLEFTSSGSANTETTK
Cadherin-13	CAD13	P55290	CDH13	1.49292	DIQGSLQDIFK; SIVVSPILIPENQR; INENTGSVSVTR; TLEGPVPLEVIVIDQNDNRPIFR	1.83895	SIVVSPILIPENQR; VNSDGGLVALR; DIQGSLQDIFK; TLEGPVPLEVIVIDQNDNRPIFR; INENTGSVSVTR
60S ribosomal protein L7	RL7	P18124	RPL7	1.0668	EVPAVPETLK; TTHFVEGGDAGNREDQINR; TTHFVEGGDAGNR; EANNFLWPFK; IALTDNALIAR	0.992276	IALTDNALIAR; TTHFVEGGDAGNR; EVPAVPETLK; AGNFYVPAEPK; EANNFLWPFK; YGIICMEDLIHEIYTVGK
LIM domain only protein 7	LMO7	Q8WWI1	LMO7	0.926802	ISINQTPGK; GISSLPR; TSTTGVATTQSPTPR; SLTSCSSDITLR; VTTEIQLPSQSPVEEQSPASLSSLR; MYSFDDVLEEGK; EAQLFHPGDLQDLSNR; NPSSSVPPPSAGSVK; EPSLATWEATWSEGSK; TPLHNDNSWIR; EVAATEEDVTR; CVACECDLGGSSSGAEVR; ALEDSSFLK; ASESISLK; EGFESDTDSEFTFK; RQPQEEVVHEDQGK; TEEASSGFLPGDR; WIDATSGIYNSEK; DSGYGDIWCPER; SYTSDLQK	1.10232	SQFFEQGSSDSVVPDLPVPTISAPSR; ISINQTPGK; TSTTGVATTQSPTPR; ACEQIGLK; SLTSCSSDITLR; STTELDDYSTNK; GISSLPR; EPSLATWEATWSEGSK; EVAATEEDVTR; ALEDSSFLK; AFENLLGQALTK; RQPQEEVVHEDQGK; WIDATSGIYNSEK; ASLENGVLLCDLINK; SQDQFSDMR
Neuralized-like protein 4	NEUL4	Q96JN8	NEURL4	nd		NaN	GATLLCALLVR
Phenylalanine--tRNA ligase beta subunit	SYFB	Q9NSD9	FARSB	NaN	LFEISDIVIK	0.987704	LFEISDIVIK; DLLFQALGR
NADH dehydrogenase [ubiquinone] 1 alpha subcomplex subunit 2	NDUA2	O43678	NDUFA2	NaN	YAFGQETNVPLNNFSADQVTR	NaN	YAFGQETNVPLNNFSADQVTR
Polypyrimidine tract-binding protein 1	PTBP1	P26599	PTBP1	1.03088	VLFSSNGGVVK; HQNVQLPR; LPIDVTEGEVISLGLPFGK; NNQFQALLQYADPVSAQHAK; LSLDGQNIYNACCTLR; DYGNSPLHR	1.25019	LSLDGQNIYNACCTLR; IAIPGLAGAGNSVLLVSNLNPER; LPIDVTEGEVISLGLPFGK; DYGNSPLHR; NNQFQALLQYADPVSAQHAK
Procollagen-lysine,2-oxoglutarate 5-dioxygenase 1	PLOD1	Q02809	PLOD1	0.651297	VGVDYEGGGCR; SEDYVDIVQGR; IFQNLDGALDEVVLK	1.58441	IFQNLDGALDEVVLK
Leucine-rich repeat flightless-interacting protein 2	LRRF2	Q9Y608	LRRFIP2	1.01677	AEQDITTLEQSISR; LAGEKEELLSQIR; ESLSEVEEK; LQLEEER	NaN	AEQDITTLEQSISR
ATP synthase subunit alpha, mitochondrial	ATPA	P25705	ATP5F1A	0.905042	TGTAEMSSILEER; HALIIYDDLSK; ELIIGDR; ILGADTSVDLEETGR; VLSIGDGIAR; STVAQLVK; EVAAFAQFGSDLDAATQQLLSR; TGAIVDVPVGEELLGR	1.27261	TGTAEMSSILEER; AVDSLVPIGR; TGAIVDVPVGEELLGR; ILGADTSVDLEETGR; QMSLLLR; STVAQLVK; EVAAFAQFGSDLDAATQQLLSR; ELIIGDR
Syndecan-4	SDC4	P31431	SDC4	nd		NaN	AGSGSQVPTEPK
Cytochrome b-c1 complex subunit 7	QCR7	P14927	UQCRB	0.356037	DDTIYEDEDVK; YEEENFYLEPYLK	0.531748	ALDLNLK; DDTIYEDEDVK; YEEENFYLEPYLK
Isoform 3 of Nucleolar and coiled-body phosphoprotein 1	NOLC1	Q14978-3	NOLC1	nd		1.19378	ATGATQQDANASSLLDIYSFWLNR
KH domain-containing, RNA-binding, signal transduction-associated protein 1	KHDR1	Q07666	KHDRBS1	0.878221	DSLDPSFTHAMQLLTAEIEK; KDDEENYLDLFSHK; SGSMDPSGAHPSVR	1.08005	DSLDPSFTHAMQLLTAEIEK; SGSMDPSGAHPSVR
Fos-related antigen 1	FOSL1	P15407	FOSL1	0.921413	ELTDFLQAETDKLEDEK	nd
Myosin regulatory light polypeptide 9	MYL9	P24844	MYL9	1.36015	FTDEEVDEMYR; NAFACFDEEASGFIHEDHLR; GNFNYVEFTR	0.98742	FTDEEVDEMYR; NAFACFDEEASGFIHEDHLR; GNFNYVEFTR
Adenylyl cyclase-associated protein 1	CAP1	Q01518	CAP1	0.9548	LEAVSHTSDMHR; VENQENVSNLVIEDTELK; LSDLLAPISEQIK	1.08412	LEAVSHTSDMHR; NSLDCEIVSAK; ALLVTASQCQQPAENK; INSITVDNCK; LVTTVTEIAG; VENQENVSNLVIEDTELK; LSDLLAPISEQIK
Eukaryotic translation initiation factor 4H	IF4H	Q15056	EIF4H	nd		NaN	ELPTEPPYTAYVGNLPFNTVQGDIDAIFK
Heterogeneous nuclear ribonucleoprotein R	HNRPR	O43390	HNRNPR	0.861916	EFNEEGALSVLQQFK; STAYEDYYYHPPPR; NLATTVTEEILEK; TLIEAGLPQK; VWGNVVTVEWADPVEEPDPEVMAK; ENILEEFSK; VTEGLVDVILYHQPDDK; TKENILEEFSK; DLYEDELVPLFEK; SFSEFGK	1.19138	EFNEEGALSVLQQFK; NLATTVTEEILEK; TLIEAGLPQK; TKENILEEFSK; ENILEEFSK; VTEGLVDVILYHQPDDK; DLYEDELVPLFEK
Guanine nucleotide-binding protein G(I)/G(S)/G(O) subunit gamma-12	GBG12	Q9UBI6	GNG12	0.937044	LEASIER; TASTNNIAQAR; ASADLMSYCEEHAR; SDPLLIGIPTSENPFK	1.3119	LEASIER; TASTNNIAQAR; ASADLMSYCEEHAR; SDPLLIGIPTSENPFK
X-ray repair cross-complementing protein 6	XRCC6	P12956	XRCC6	1.15131	TFNTSTGGLLLPSDTK; KQELLEALTK; LGSLVDEFK; NIPPYFVALVPQEEELDDQK; DTGIFLDLMHLK; DLLAVVFYGTEK; ELVYPPDYNPEGK; VEYSEEELK; DIISIAEDEDLR; DSLIFLVDASK; NIYVLQELDNPGAK; ILELDQFK; SDSFENPVLQQHFR	1.10291	LGSLVDEFK; TFNTSTGGLLLPSDTK; KQELLEALTK; EVAALCR; NIPPYFVALVPQEEELDDQK; DTGIFLDLMHLK; IMLFTNEDNPHGNDSAK; NLEALALDLMEPEQAVDLTLPK; DLLAVVFYGTEK; ELVYPPDYNPEGK; VEYSEEELK; DIISIAEDEDLR; IQVTPPGFQLVFLPFADDK; IQVTPPGFQLVFLPFADDKR; FTVPMLK; DSLIFLVDASK; NIYVLQELDNPGAK; ILELDQFK; SDSFENPVLQQHFR
Tropomyosin beta chain	TPM2	P07951	TPM2	NaN	QLEEEQQALQK	0.65645	QLEEEQQALQK; AISEELDNALNDITSL
Transmembrane emp24 domain-containing protein 9	TMED9	Q9BVK6	TMED9	0.894773	QLVEQVEQIQK; LSELQLR	1.72421	QLVEQVEQIQK; LSELQLR
Transcription factor IIIB 90 kDa subunit	TF3B	Q92994	BRF1	0.648638	ENAEYLR	0.586294	ENAEYLR
Serine/arginine repetitive matrix protein 2	SRRM2	Q9UQ35	SRRM2	0.555476	TPQAPASANLVGPR	NaN	TPQAPASANLVGPR
Very-long-chain enoyl-CoA reductase	TECR	Q9NZ01	TECR	NaN	HYEVEILDAK	nd
Spindlin-1	SPIN1	Q9Y657	SPIN1	0.753551	YDGFDCVYGLELNKDER; VSALEVLPDR	NaN	VSALEVLPDR
Microtubule-associated protein 4	MAP4	P27816	MAP4	1.12903	TDYIPLLDVDEK; VGSLDNVGHLPAGGAVK; TTTLSGTAPAAGVVPSR; CSLPAEEDSVLEK; LATNTSAPDLK	1.39733	VGSLDNVGHLPAGGAVK; LDVTLAK; NVVLPTETEVAPAK; TTTLSGTAPAAGVVPSR; TDYIPLLDVDEK; LATNTSAPDLK
Heterogeneous nuclear ribonucleoprotein U	HNRPU	Q00839	HNRNPU	0.910416	NGQDLGVAFK; FIEIAAR; NFILDQTNVSAAAQR; DIDIHEVR; GNFTLPEVAECFDEITYVELQK; LLEQYKEESK; EKPYFPIPEEYTFIQNVPLEDR; FDENDVITCFANFESDEVELSYAK; TCNCETEDYGEK	0.950798	DIDIHEVR; FIEIAAR; NFILDQTNVSAAAQR; NGQDLGVAFK; GYFEYIEENK; GNFTLPEVAECFDEITYVELQK; LLEQYKEESK; EKPYFPIPEEYTFIQNVPLEDR; FDENDVITCFANFESDEVELSYAK; LNTLLQR; TCNCETEDYGEK
Splicing factor 3A subunit 3	SF3A3	Q12874	SF3A3	1.03199	SLESLDTSLFAK	NaN	SLESLDTSLFAK
Reticulon-3	RTN3	O95197	RTN3	nd		NaN	SVIQAVQK
ATP synthase subunit beta, mitochondrial	ATPB	P06576	ATP5F1B	1.00019	VALTGLTVAEYFR; AIAELGIYPAVDPLDSTSR; FTQAGSEVSALLGR; IMNVIGEPIDER; DQEGQDVLLFIDNIFR; VLDSGAPIK	1.18865	VVDLLAPYAK; VALTGLTVAEYFR; IPVGPETLGR; AIAELGIYPAVDPLDSTSR; TIAMDGTEGLVR; FTQAGSEVSALLGR; IMNVIGEPIDER; DQEGQDVLLFIDNIFR; IMDPNIVGSEHYDVAR
RNA transcription, translation and transport factor protein	RTRAF	Q9Y224	RTRAF	1.05906	NFIVWLEDQK; LLHIEELR	0.786234	NFIVWLEDQK; HILGFDTGDAVLNEAAQILR; LLHIEELR
Serine/arginine-rich splicing factor 6	SRSF6	Q13247	SRSF6	0.876508	FFSGYGR; LDGTEINGR	NaN	FFSGYGR; LDGTEINGR
Proteasome activator complex subunit 2	PSME2	Q9UL46	PSME2	1.28051	QNLFQEAEEFLYR	1.69228	IEDGNDFGVAIQEK; QNLFQEAEEFLYR
Oxygen-regulated protein 1	RP1	P56715	RP1	nd		NaN	KSLVSKVTDSHITLK
CTTNBP2 N-terminal-like protein	CT2NL	Q9P2B4	CTTNBP2NL	3.32525	TNGHCDPEIQTTR; DLVIEALK; LEEELAAER; NTVTQVLSR; DLEASHQHSSPNEQLK; KVILDLEEER; LTQQLEFEK; NLANTANPR; DVELLLPTSS; DLSPTLIDNSAAK	3.47523	DLVIEALK; LEEELAAER; YNISDPLMALQR; KLSSQLEEER; LTQQLEFEK; LSSQLEEER; HAQDTAEGDDVTYMLEK; DVELLLPTSS; VSSPLSPLSPGIK; GLQTEAQVEK
Serine/arginine-rich splicing factor 9	SRSF9	Q13242	SRSF9	0.473701	IYVGNLPTDVR; EAGDVCYADVQK; EKDLEDLFYK; DLEDLFYK	1.38307	IYVGNLPTDVR; EAGDVCYADVQK
Reticulocalbin-1	RCN1	Q15293	RCN1	0.763334	EQFNEFR; AADLNGDLTATR; ISWEEYK; HWILPQDYDHAQAEAR; TFDQLTPDESK; EIVVLETLEDIDK; IDNDGDGFVTTEELK	1.07246	EQFNEFR; AADLNGDLTATR; ISWEEYK; HWILPQDYDHAQAEAR; TFDQLTPDESK; EIVVLETLEDIDK; IDNDGDGFVTTEELK
Fatty acid synthase	FAS	P49327	FASN	nd		NaN	DNLEFFLAGIGR
U4/U6.U5 tri-snRNP-associated protein 1	SNUT1	O43290	SART1	0.797702	DLQGLTVEHAIDSFR	nd
Serine/threonine-protein kinase RIO1	RIOK1	Q9BRS2	RIOK1	0.76748	TSILVFK; VPALLENQVEER	NaN	VPALLENQVEER; LNVTDSVINK
Ubiquitin carboxyl-terminal hydrolase 10	UBP10	Q14694	USP10	1.77256	TVQDALESLVAR	nd
Neutral alpha-glucosidase AB	GANAB	Q14697	GANAB	nd		1.415	TCEESSFCK; GLLEFEHQR; VTEGGEPYR; NPEPELLVR; DENSVELTMAEGPYK; FGAVWTGDNTAEWDHLK
ELAV-like protein 1	ELAV1	Q15717	ELAVL1	0.906271	VLVDQTTGLSR; SEAEEAITSFNGHKPPGSSEPITVK; DVEDMFSR; DANLYISGLPR; SLFSSIGEVESAK	1.23079	VLVDQTTGLSR; DVEDMFSR
Guanine nucleotide-binding protein G(i) subunit alpha-2	GNAI2	P04899	GNAI2	1.08402	YDEAASYIQSK; EYQLNDSAAYYLNDLER; IIHEDGYSEEECR; QLFALSCTAEEQGVLPDDLSGVIR; IAQSDYIPTQQDVLR; AMGNLQIDFADPSR	1.39245	YDEAASYIQSK; EYQLNDSAAYYLNDLER; IIHEDGYSEEECR; QLFALSCTAEEQGVLPDDLSGVIR; ITHSPLTICFPEYTGANK; LWADHGVQACFGR; IAQSDYIPTQQDVLR
Ferric-chelate reductase 1	FRRS1	Q6ZNA5	FRRS1	nd		NaN	GFLLEAR
Annexin A5	ANXA5	P08758	ANXA5	0.977196	SEIDLFNIR; DPDAGIDEAQVEQDAQALFQAGELK; GLGTDEESILTLLTSR	1.5164	VLTEIIASR; DPDAGIDEAQVEQDAQALFQAGELK; ETSGNLEQLLLAVVK; SEIDLFNIR; DLLDDLKSELTGK; GLGTDEESILTLLTSR; GTVTDFPGFDER; GAGTDDHTLIR
Guanine nucleotide-binding protein G(k) subunit alpha	GNAI3	P08754	GNAI3	0.995229	EYQLNDSASYYLNDLDR; DGGVQACFSR; ISQSNYIPTQQDVLR; IDFGEAAR	1.31618	EYQLNDSASYYLNDLDR; IDFGEAAR; ISQSNYIPTQQDVLR; IIHEDGYSEDECK
Mitochondrial import receptor subunit TOM5 homolog	TOM5	Q8N4H5	TOMM5	nd		NaN	EDVISSIR; IEGLAPK
Apolipoprotein A-I	APOA1	P02647	APOA1	NaN	LAARLEALK	nd
Peptidyl-prolyl cis-trans isomerase B	PPIB	P23284	PPIB	0.9257	VLEGMEVVR; IGDEDVGR; DVIIADCGK; DTNGSQFFITTVK; DFMIQGGDFTR; TVDNFVALATGEK	1.43155	VLEGMEVVR; DVIIADCGK; DTNGSQFFITTVK; DFMIQGGDFTR; TAWLDGK; TVDNFVALATGEK; IEVEKPFAIAK
Hexokinase-1	HXK1	P19367	HK1	0.270564	ASGVEGADVVK; FNTSDVSAIEK; LVPDSDVR; ATDCVGHDVVTLLR; ITPELLTR; EGLLFEGR; LSDETLIDIMTR; LVDEYSLNAGK; GDFIALDLGGSSFR; AEMELGLR	0.377068	TTVGVDGSLYK; ASGVEGADVVK; FNTSDVSAIEK; ATDCVGHDVVTLLR; EGLLFEGR; LSDETLIDIMTR; LVDEYSLNAGK; LGVEPSDDDCVSVQHVCTIVSFR; HIDLVEGDEGR; AEMELGLR; DFNPTATVK
OCIA domain-containing protein 2	OCAD2	Q56VL3	OCIAD2	NaN	FHFFEDQLR	0.587964	FHFFEDQLR
Dynein heavy chain 7, axonemal	DYH7	Q8WXX0	DNAH7	nd		NaN	LAAAEGELK
Proteasome subunit alpha type-7	PSA7	O14818	PSMA7	NaN	ILNPEEIEK	nd
Metaxin-1	MTX1	Q13505	MTX1	nd		0.253693	ISNPWQSPSGTLPALR; YNADYDLSAR; QTPAGPETEEEPYR; NYVEVTR
Cell growth-regulating nucleolar protein	LYAR	Q9NX58	LYAR	0.865582	ELLEQISAFDNVPR	nd
Dihydrolipoyl dehydrogenase, mitochondrial	DLDH	P09622	DLD	0.932104	IDVSIEAASGGK; NLGLEELGIELDPR; ADGGTQVIDTK	0.863279	IDVSIEAASGGK; NLGLEELGIELDPR; ADGGTQVIDTK; AAQLGFK
Serine/threonine-protein phosphatase PP1-gamma catalytic subunit	PP1G	P36873	PPP1CC	0.898838	NVQLQENEIR	NaN	LNIDSIIQR
Prolyl 3-hydroxylase 1	P3H1	Q32P28	P3H1	nd		1.55959	LTNVAATSGDGYR; DLSFFGGLLR
2,4-dienoyl-CoA reductase, mitochondrial	DECR	Q16698	DECR1	1.99516	VHAIQCDVR; EQWDTIEELIR; ATAEQISSQTGNK	NaN	ATAEQISSQTGNK; FFSPLQK; EQWDTIEELIR
5'-nucleotidase domain-containing protein 2	NT5D2	Q9H857	NT5DC2	NaN	QGNLFDFLR	NaN	QGNLFDFLR
Methylosome protein 50	MEP50	Q9BQA1	WDR77	1.20892	VWDLAQQVVLSSYR; ILLWDTR; KETPPPLVPPAAR; DPCAAPNEGFCSAGVQTEAGVADLTWVGER; SDGALLLGASSLSGR; EWNLPPNAPACMER; DSVFLSCSEDNR; GILVASDSGAVELWELDENETLIVSK; AHAAQVTCVAASPHK; ETPPPLVPPAAR; YEHDDIVSTVSVLSSGTQAVSGSK	1.17235	VWDLAQQVVLSSYR; ILLWDTR; KETPPPLVPPAAR; DPCAAPNEGFCSAGVQTEAGVADLTWVGER; SDGALLLGASSLSGR; EWNLPPNAPACMER; DSVFLSCSEDNR; GILVASDSGAVELWELDENETLIVSK; AHAAQVTCVAASPHK; ETPPPLVPPAAR; YEHDDIVSTVSVLSSGTQAVSGSK
Insulin-like growth factor 2 mRNA-binding protein 2	IF2B2	Q9Y6M1	IGF2BP2	0.866543	LYIGNLSPAVTADDLR; SGYAFVDYPDQNWAIR; DQTPDENEEVIVR; YPQGVASQR; LAEEIPLK; QIDFPLR; ISYIPDEEVSSPSPPQR; IAPAEGPDVSER	1.02196	LSGHQFENYSFK; DQTPDENEEVIVR; LAEEIPLK; YPQGVASQR; IAPAEGPDVSER
Alpha-2-macroglobulin	A2MG	P01023	A2M	NaN	GEAFTLK	6.2718	QTVSWAVTPK
Guanine nucleotide-binding protein G(s) subunit alpha isoforms XLas	GNAS1	Q5JWF2	GNAS	1.18926	VLTSGIFETK; SNEYQLIDCAQYFLDK; IEDYFPEFAR; ALWEDEGVR; QADYVPSDQDLLR; LQEALNLFK; YTTPEDATPEPGEDPR	2.18663	YTTPEDATPEPGEDPR; IEDYFPEFAR; VLTSGIFETK; ALWEDEGVR; SNEYQLIDCAQYFLDK
Proteasome subunit alpha type-6	PSA6	P60900	PSMA6	nd		NaN	AINQGGLTSVAVR
Protein mono-ADP-ribosyltransferase PARP4	PARP4	Q9UKK3	PARP4	0.623273	TTPVDLCLLEESVGSLEGSR	1.12187	SPVDVLQIFR; TTPVDLCLLEESVGSLEGSR
tRNA-splicing ligase RtcB homolog	RTCB	Q9Y3I0	RTCB	0.872616	NVTDVVNTCHDAGISK	nd
IST1 homolog	IST1	P53990	IST1	nd		1.5617	ELDSGLAESVSTLIWAAPR
Ras-related protein R-Ras	RRAS	P10301	RRAS	NaN	LNVDEAFEQLVR	2.82876	LNVDEAFEQLVR
Cytochrome b reductase 1	CYBR1	Q53TN4	CYBRD1	1.00823	EPNSTILHPNGGTEQGAR; NLALDEAGQR	NaN	NLALDEAGQR
Neuronal growth regulator 1	NEGR1	Q7Z3B1	NEGR1	nd		NaN	VVVNFAPTIQEIK
T-complex protein 1 subunit beta	TCPB	P78371	CCT2	1.07947	GATQQILDEAER; AAHSEGNTTAGLDMR; VQDDEVGDGTTSVTVLAAELLR; LGGSLADSYLDEGFLLDK; LALVTGGEIASTFDHPELVK; LGGSLADSYLDEGFLLDKK; GSGNLEAIHIIK; ILIANTGMDTDK; EALLSSAVDHGSDEVK	1.29592	SLHDALCVLAQTVK; KLGGSLADSYLDEGFLLDK; GATQQILDEAER; LALVTGGEIASTFDHPELVK; VQDDEVGDGTTSVTVLAAELLR; LGGSLADSYLDEGFLLDK; LIEEVMIGEDK; GSGNLEAIHIIK; ILIANTGMDTDK; EALLSSAVDHGSDEVK
Dynein light chain Tctex-type 1	DYLT1	P63172	DYNLT1	nd		1.38696	VNQWTTNVVEQTLSQLTK
Delta-1-pyrroline-5-carboxylate synthase	P5CS	P54886	ALDH18A1	nd		NaN	QIAASSQDSVGR
Twinfilin-2	TWF2	Q6IBS0	TWF2	1.024	TEISVESK; ETIELVHTEPTDVAQLPSR; VVIEDEQLVLGASQEPVGR; DDLSFAGYQK; HLSSCAAPAPLTSAER	1.10136	TEISVESK; ETIELVHTEPTDVAQLPSR; VVIEDEQLVLGASQEPVGR; HLSSCAAPAPLTSAER
Protein phosphatase 1G	PPM1G	O15355	PPM1G	NaN	NTAELQPESGK	nd
Dual specificity protein phosphatase 10	DUS10	Q9Y6W6	DUSP10	nd		NaN	GGLSSFK
NADH dehydrogenase [ubiquinone] iron-sulfur protein 4, mitochondrial	NDUS4	O43181	NDUFS4	0.38033	EDAVSFAEK; LDITTLTGVPEEHIK	0.452989	EDAVSFAEK
Proteasome activator complex subunit 3	PSME3	P61289	PSME3	1.51528	LLELDSFLK; TVESEAASYLDQISR	1.30584	SNQQLVDIIEK; TVESEAASYLDQISR
60S ribosomal protein L5	RL5	P46777	RPL5	1.12361	EFNAEVHR; GAVDGGLSIPHSTK; IEGDMIVCAAYAHELPK; FPGYDSESK; RFPGYDSESK; YLMEEDEDAYKK; QFSQYIK	1.15022	EFNAEVHR; GAVDGGLSIPHSTK; IEGDMIVCAAYAHELPK; RFPGYDSESK; YLMEEDEDAYKK; NSVTPDMMEEMYK
T-complex protein 1 subunit eta	TCPH	Q99832	CCT7	1.42995	LPIGDVATQYFADR; ALEIIPR; SQDAEVGDGTTSVTLLAAEFLK; ATISNDGATILK	1.15748	INALTAASEAACLIVSVDETIK; YNFFTGCPK; SQDAEVGDGTTSVTLLAAEFLK; ALEIIPR; TATQLAVNK; CQVFEETQIGGER; ATISNDGATILK; TCTFILR; EGTDSSQGIPQLVSNISACQVIAEAVR
60S ribosomal protein L21	RL21	P46778	RPL21	1.30954	EPELLEPIPYEFMA; GDIVDIK; KGDIVDIK; GTWVQLK	1.10961	KGDIVDIK; GTWVQLK
Striatin-4	STRN4	Q9NRL3	STRN4	2.63495	APPGPAGLSGGESLLVK; LWSLDNK; ALIASAGADALAK; LASCSADGTVR; QIEEQIKR; FGTDLNQGEK; ADVSEQVSNGPVESVTLENSPLVWK; CTVDGSPHELESR; NAALDVEPIHAFR; LQGILADLR; SLELNGAVEPSEGAPR; GSSGPTQINQVVSHPNQPLTITAHDDR; SGDTVLYDMEVGSALLTLESR	3.62094	APPGPAGLSGGESLLVK; SGDTVLYDMEVGSALLTLESR; LWSLDNK; ALIASAGADALAK; LASCSADGTVR; FGTDLNQGEK; CTVDGSPHELESR; SLELNGAVEPSEGAPR; GSSGPTQINQVVSHPNQPLTITAHDDR; LQGILADLR
Sarcoplasmic/endoplasmic reticulum calcium ATPase 2	AT2A2	P16615	ATP2A2	NaN	DIVPGDIVEIAVGDK	nd
Paraspeckle component 1	PSPC1	Q8WXF1	PSPC1	nd		1.36834	NLSPVVSNELLEQAFSQFGPVEK
Nucleolar and coiled-body phosphoprotein 1	NOLC1	Q14978	NOLC1	0.869105	DNQLSEVANK; ITPVTVK	1.50152	DNQLSEVANK; ITPVTVK; ATGATQQDANASSLLDIYSFWLK
DnaJ homolog subfamily C member 10	DJC10	Q8IXB1	DNAJC10	0.563352	IGAVNCGDDR; YDFGIYDDDPEIITLER	NaN	IGAVNCGDDR
Mitochondrial import receptor subunit TOM20 homolog	TOM20	Q15388	TOMM20	0.435321	FFLEEIQLGEELLAQGEYEK	nd
Coiled-coil-helix-coiled-coil-helix domain-containing protein 2	CHCH2	Q9Y6H1	CHCHD2	NaN	LCEGFNEVLK	nd
Protein THEMIS	THMS1	Q8N1K5	THEMIS	2.20636	ILASEIR	0.388531	ILASEIR
Ragulator complex protein LAMTOR1	LTOR1	Q6IAA8	LAMTOR1	NaN	TDEQALLSSILAK	3.02404	TDEQALLSSILAK
Catenin delta-1	CTND1	O60716	CTNND1	0.900407	VGGSSVDLHR; YQEAAPNVANNTGPHAASCFGAK; HAIPNLVK; SLDNNYSTPNER; SDFQVNLNNASR; SQSSHSYDDSTLPLIDR; GYELLFQPEVVR; ALSAIADLLTNEHER	1.13791	VGGSSVDLHR; ALSAIADLLTNEHER; SLDNNYSTPNER; GYELLFQPEVVR
Ran-specific GTPase-activating protein	RANG	P43487	RANBP1	nd		NaN	TLEEDEEELFK
Inverted formin-2	INF2	Q27J81	INF2	0.5224	QEEVCVIDALLADIR	NaN	LPSNVAR
Glutamate-rich WD repeat-containing protein 1	GRWD1	Q9BQ67	GRWD1	0.667221	VSWLGEEPVAGVWSEK	nd
Importin subunit beta-1	IMB1	Q14974	KPNB1	1.00105	VLANPGNSQVAR	1.14518	AAVENLPTFLVELSR; VLANPGNSQVAR; LAATNALLNSLEFTK
Regulator of nonsense transcripts 1	RENT1	Q92900	UPF1	0.906694	AYQHGGVTGLSQY; WDLGLNK; DINWDSSQWQPLIQDR; VPDNYGDEIAIELR; ESQTQDNITVR; EAIDSPVSFLALHNQIR; QITAQQINK; LLGHEVEDVIIK; ENPSATLEDLEKPGVDEEPQHVLLR; YEDAYQYQNIFGPLVK	0.944796	AYQHGGVTGLSQY; EKDFIILSCVR; LMQGDEICLR; ESQTQDNITVR; ADSVVVLLCR; QITAQQINK; LLGHEVEDVIIK
Cytochrome c oxidase subunit 7C, mitochondrial	COX7C	P15954	COX7C	0.516872	NLPFSVENK	0.558171	NLPFSVENK
Major prion protein	PRIO	P04156	PRNP	1.06003	VVEQMCITQYER	1.88008	ESQAYYQR; GENFTETDVK; VVEQMCITQYER
Kinesin light chain 1	KLC1	Q07866	KLC1	0.0319875	DAANLLNDALAIR	4.31913	DAANLLNDALAIR
Vacuolar protein sorting-associated protein 45	VPS45	Q9NRW7	VPS45	NaN	LVMLYALHYERHSSNSLPGLMMDLR	NaN	LVMLYALHYERHSSNSLPGLMMDLR
Cytochrome b-c1 complex subunit 2, mitochondrial	QCR2	P22695	UQCRC2	0.386921	NALANPLYCPDYR; YEDFSNLGTTHLLR; TIAQGNLSNTDVQAAK; WEVADLQPQLK; LSVTATR	0.473945	LSVTATR; ATAAPAGAPPQPQDLEFTK; TIAQGNLSNTDVQAAK; YEDFSNLGTTHLLR; SMAASGNLGHTPFVDEL; NALANPLYCPDYR
A-kinase anchor protein 12	AKA12	Q02952	AKAP12	0.716134	SDEVDEQVACQEVK; VKEESQLPGTGGPEDVLQPVQR	1.16766	AATIIEER; LTASEQAHPQEPAESAHEPR; LVQNIIQTAVDQFVR; TEGTQEADQYADEK; VKEESQLPGTGGPEDVLQPVQR
Isoform 3 of Tropomyosin beta chain	TPM2	P07951-3	TPM2	0.846822	SLMASEEEYSTK; QLEEELR; TIDDLEETLASAK; EENVEIHQTLDQTLLELNNL	0.924943	SLMASEEEYSTK; QLEEELR; TIDDLEETLASAK; EENVEIHQTLDQTLLELNNL
Pre-mRNA-processing-splicing factor 8	PRP8	Q6P2Q9	PRPF8	0.632407	TAEEVAALIR; SQEPLPDDDEEFELPEFVEPFLK; FGDLILK; TEDPDLPAFYFDPLINPISHR	NaN	FGDLILK
RNA-binding protein FUS	FUS	P35637	FUS	7.96311	EFSGNPIK	0.239624	APKPDGPGGGPGGSHMGGNYGDDR; EFSGNPIK
Lupus La protein	LA	P05455	SSB	1.91846	EVTWEVLEGEVEK; IIEDQQESLNK; EGIILFK; ETDLLILFK; GSIFVVFDSIESAK	1.86712	IIEDQQESLNK; EGIILFK; ICHQIEYYFGDFNLPR; ETDLLILFK; FSGDLDDQTCR
GTPase HRas	RASH	P01112	HRAS	1.16976	SFEDIHQYR; SYGIPYIETSAK; LNPPDESGPGCMSCK	1.57992	SYGIPYIETSAK; SFEDIHQYR; LNPPDESGPGCMSCK
Protein S100-A10	S10AA	P60903	S100A10	0.629069	EFPGFLENQKDPLAVDK; DPLAVDK	0.980781	EFPGFLENQKDPLAVDK; DPLAVDK
Glucose-6-phosphate isomerase	G6PI	P06744	GPI	nd		NaN	EWFLQAAK
Endoplasmic reticulum chaperone BiP	BIP	P11021	HSPA5	1.15463	VTHAVVTVPAYFNDAQR; LYGSAGPPPTGEEDTAEKDEL; ETAEAYLGK; FEELNMDLFR; ITITNDQNR; TWNDPSVQQDIK; VMEHFIK; TFAPEEISAMVLTK; VLEDSDLK; DNHLLGTFDLTGIPPAPR; KSDIDEIVLVGGSTR; VLEDSDLKK; SDIDEIVLVGGSTR; NELESYAYSLK; IEWLESHQDADIEDFK; VYEGERPLTK; LTPEEIER; IEIESFYEGEDFSETLTR; ELEEIVQPIISK; NQLTSNPENTVFDAK; SQIFSTASDNQPTVTIK; DAGTIAGLNVMR; ITPSYVAFTPEGER	1.38446	VTHAVVTVPAYFNDAQR; LYGSAGPPPTGEEDTAEKDEL; ETAEAYLGK; FEELNMDLFR; ITITNDQNR; TWNDPSVQQDIK; DNHLLGTFDLTGIPPAPR; VLEDSDLKK; TFAPEEISAMVLTK; KSDIDEIVLVGGSTR; VLEDSDLK; SDIDEIVLVGGSTR; AKFEELNMDLFR; IEWLESHQDADIEDFK; VYEGERPLTK; IEIESFYEGEDFSETLTR; ELEEIVQPIISK; NQLTSNPENTVFDAK; SQIFSTASDNQPTVTIK; MKETAEAYLGK; DAGTIAGLNVMR; ITPSYVAFTPEGER
Serine/arginine-rich splicing factor 3	SRSF3	P84103	SRSF3	NaN	VYVGNLGNNGNK; AFGYYGPLR	1.12145	VYVGNLGNNGNK; AFGYYGPLR
Protein LSM14 homolog A	LS14A	Q8ND56	LSM14A	1.75841	VSRPENEQLR	1.32413	VSRPENEQLR
YTH domain-containing family protein 3	YTHD3	Q7Z739	YTHDF3	4.87078	AITDGQAGFGNDTLSK	NaN	AITDGQAGFGNDTLSK
Gamma-interferon-inducible protein 16	IF16	Q16666	IFI16	0.975869	VFNIDLK; EVDATSPAPSTSSTVK	NaN	EVDATSPAPSTSSTVK
Caveolae-associated protein 3	CAVN3	Q969G5	CAVIN3	0.769644	LEANHGLLVAR	0.930114	LEANHGLLVAR; LASMLETLR; IQSGLGALSR
