# Supplementary material for: STRIPAK directs PP2A activity toward MAP4K4 to promote oncogenic transformation of human cells
Source: eLife. 2020 Jan 8;9:e53003. doi: 10.7554/eLife.53003 (PMC6984821; doi:10.7554/eLife.53003)
Supplement: Supplementary file 4. [file elife-53003-supp4.xlsx]

## Sheet: S4
Supplementary file 4. Results of the SILAC experiment representing targeted MAP4K4 phospho-profiling.
Protein Description	Protein Name	UniProt Accession	Gene Symbol	Site	AS-20190516-IP1 Ratio (ST/GFP)	AS-20190516-IP1 Peptide Sequences	AS-20190516-IP2 Ratio (ST/GFP)	AS-20190516-IP2 Peptide Sequences
Transcription factor E2F7	E2F7	Q96AV8	E2F7	S410	1.49083	HGsFNTVQASER	2.41564	HGsFNTVQASER
Gamma-interferon-inducible protein 16	IF16	Q16666	IFI16	S106	0.927692	EVDATsPAPSTSSTVK	1.06616	EVDATsPAPSTSSTVK
Serine/arginine repetitive matrix protein 2	SRRM2	Q9UQ35	SRRM2	S1869	0.789605	SRAsPATHR	nd
La-related protein 4	LARP4	Q71RC2	LARP4	S583	1.29175	DGLNQTTIPVsPPSTTKPSR	1.00614	DGLNQTTIPVsPPSTTKPSR
E3 ubiquitin-protein ligase HUWE1	HUWE1	Q7Z6Z7	HUWE1	S1907	nd		1.28056	GSGTAsDDEFENLR
Thyroid hormone receptor-associated protein 3	TR150	Q9Y2W1	THRAP3	S928; S939	NaN	WAHDKFsGEEGEIEDDEsGTENR	1.55782	WAHDKFsGEEGEIEDDEsGTENREEK; WAHDKFsGEEGEIEDDEsGTENR
60S acidic ribosomal protein P1	RLA1	P05386	RPLP1	S104	1.01365	KEESEEsDDDMGFGLFD	1.08098	KEESEEsDDDMGFGLFD
LIM domain only protein 7	LMO7	Q8WWI1	LMO7	S988	1.02979	LPsPTSPFSSLSQDQAATSK; EVAATEEDVTRLPsPTSPFSSLSQDQAATSK	1.31696	LPsPTSPFSSLSQDQAATSK
Serine/arginine-rich splicing factor 10	SRS10	O75494	SRSF10	S133	0.835805	sFDYNYR	0.933112	sFDYNYR
Beta-2-syntrophin	SNTB2	Q13425	SNTB2	S395	nd		1.05032	SPsLGSDLTFATR
Abscission/NoCut checkpoint regulator	ANCHR	Q96K21	ZFYVE19	S144	nd		NaN	WsPPQNYK
Serine/arginine-rich splicing factor 9	SRSF9	Q13242	SRSF9	S211	0.883568	GsPHYFSPFRPY	1.32521	GsPHYFSPFRPY
Isoform 2 of Epsin-2	EPN2	O95208-2	EPN2	S192; S195	1.06558	AGGsPAsYHGSTSPR	1.44572	AGGsPAsYHGSTSPR
Serine/arginine repetitive matrix protein 2	SRRM2	Q9UQ35	SRRM2	S2020; T2022	nd		1.08796	sRtPPAIR
Guanine nucleotide-binding protein-like 1	GNL1	P36915	GNL1	S51	nd		1.29186	EEQTDTsDGESVTHHIR
Myelin expression factor 2	MYEF2	Q9P2K5	MYEF2	T13	0.476441	AEVPGAtGGDSPHLQPAEPPGEPR	nd
A-kinase anchor protein 2	AKAP2	Q9Y2D5	AKAP2	S152	1.08575	DALGDSLQVPVsPSSTTSSR	1.45978	DALGDSLQVPVsPSSTTSSR
PHD and RING finger domain-containing protein 1	PHRF1	Q9P1Y6	PHRF1	S867	nd		NaN	TISINsPK
Serine/arginine repetitive matrix protein 2	SRRM2	Q9UQ35	SRRM2	S994	0.86523	QSHSGSIsPYPK	0.767456	QSHSGSIsPYPK
Serine/arginine repetitive matrix protein 1	SRRM1	Q8IYB3	SRRM1	S414	NaN	TRHsPTPQQSNR	nd
Nuclear pore complex protein Nup155	NU155	O75694	NUP155	S992	NaN	AAPQsPSVPK	NaN	AAPQsPSVPK
Splicing factor U2AF 65 kDa subunit	U2AF2	P26368	U2AF2	S79	0.991086	EEHGGLIRsPR	0.971896	EEHGGLIRsPR
Serine/arginine repetitive matrix protein 2	SRRM2	Q9UQ35	SRRM2	S2032; T2034	0.811473	sRtPLLPR	1.01184	sRtPLLPR
Serine/arginine repetitive matrix protein 2	SRRM2	Q9UQ35	SRRM2	S323	0.737144	RGEGDAPFSEPGTTSTQRPSsPETATK	1.14293	RGEGDAPFSEPGTTSTQRPSsPETATK; GEGDAPFSEPGTTSTQRPSsPETATK
Cleavage stimulation factor subunit 3	CSTF3	Q12996	CSTF3	S691	nd		0.936645	RPNEDsDEDEEKGAVVPPVHDIYR
Triosephosphate isomerase	TPIS	P60174	TPI1	S58	nd		1.00144	KQsLGELIGTLNAAK
Nardilysin	NRDC	O43847	NRDC	S96	NaN	RGSLsNAGDPEIVK	1.9303	RGSLsNAGDPEIVK
Gamma-adducin	ADDG	Q9UEY8	ADD3	S679	nd		1.9388	IEEVLSPEGSPsKSPSK
Importin subunit alpha-1	IMA1	P52292	KPNA2	T61	nd		1.62238	NVSSFPDDAtSPLQENR
Cytospin-B	CYTSB	Q5M775	SPECC1	S810	0.18892	TsPTPPESATTVK	0.803106	TsPTPPESATTVK
[F-actin]-monooxygenase MICAL3	MICA3	Q7RTP6	MICAL3	S1649	2.40944	RPDsPTRPTLR	2.32266	RPDsPTRPTLR
Bcl-2-associated transcription factor 1	BCLF1	Q9NYF8	BCLAF1	S531	0.818679	STFREEsPLR	1.25698	STFREEsPLR
Nuclease-sensitive element-binding protein 1	YBOX1	P67809	YBX1	S102	1.14142	sVGDGETVEFDVVEGEK	NaN	sVGDGETVEFDVVEGEK
Zinc finger protein 185	ZN185	O15231	ZNF185	S512	nd		NaN	GGQGDPAVPTQQPADPsTPEQQNSPSGSEQFVR
Filamin-B	FLNB	O75369	FLNB	S983	NaN	LDVTILsPSR	1.33498	LDVTILsPSR
Stathmin	STMN1	P16949	STMN1	S25	NaN	ASGQAFELILsPR	2.1285	ASGQAFELILsPR
Myotubularin-related protein 5	MTMR5	O95248	SBF1	T1138	NaN	LGLGtLSSSLSR	nd
Plectin	PLEC	Q15149	PLEC	S4389; S4390; S4391	nd		0.704498	SRSSSVGsssSYPISPAVSR
Peroxisomal membrane protein PEX14	PEX14	O75381	PEX14	S275	NaN	SPSPSSPAAVNHHSSSDISPVSNESTSSsPGK	nd
Tyrosine-protein kinase Lyn	LYN	P07948	LYN	S11	nd		0.834097	GKDsLSDDGVDLK
Nuclear mitotic apparatus protein 1	NUMA1	Q14980	NUMA1	S1757	nd		NaN	TQPDGTSVPGEPAsPISQR
Protein TANC2	TANC2	Q9HCD6	TANC2	S1457	1.30006	DSAYISsSPLGSHQVFDFR	nd
Serine/arginine repetitive matrix protein 2	SRRM2	Q9UQ35	SRRM2	S1042	nd		1.23402	SsTPPGESYFGVSSLQLK
Density-regulated protein	DENR	O43583	DENR	S73	0.948508	LTVENsPKQEAGISEGQGTAGEEEEK	1.3316	LTVENsPKQEAGISEGQGTAGEEEEK
Drebrin	DREB	Q16643	DBN1	T343	1.10786	SPSDSStASTPVAEQIER; MAPTPIPTRSPSDSStASTPVAEQIER	1.43889	SPSDSStASTPVAEQIER; MAPTPIPTRSPSDSStASTPVAEQIER
Thyroid hormone receptor-associated protein 3	TR150	Q9Y2W1	THRAP3	S248; S253	0.876899	ERsPALKsPLQSVVVR	1.17186	ERsPALKsPLQSVVVR
RNA-binding protein 14	RBM14	Q96PK6	RBM14	S582	0.858514	TRLsPPR	1.09678	TRLsPPR
Src substrate cortactin	SRC8	Q14247	CTTN	T401; S405	1.34036	AKTQtPPVsPAPQPTEER; TQtPPVsPAPQPTEER	1.98662	AKTQtPPVsPAPQPTEER; TQtPPVsPAPQPTEER
Isoform 5 of Peripheral plasma membrane protein CASK	CSKP	O14936-5	CASK	S192	0.925041	TQSSsCEDLPSTTQPK	1.00725	TQSSsCEDLPSTTQPK
Nuclease-sensitive element-binding protein 1	YBOX1	P67809	YBX1	S176	nd		0.983344	NYQQNYQNSESGEKNEGSEsAPEGQAQQR
Spectrin beta chain, non-erythrocytic 1	SPTB2	Q01082	SPTBN1	S2341	1.14681	AQTLPTSVVTITSESsPGK; AQTLPTSVVTITSESsPGKR	1.18554	AQTLPTSVVTITSESsPGK; AQTLPTSVVTITSESsPGKR
Glycogen synthase kinase-3 beta	GSK3B	P49841	GSK3B	S219	1.21572	GEPNVSYICsR	1.17685	GEPNVSYICsR
Piezo-type mechanosensitive ion channel component 1	PIEZ1	Q92508	PIEZO1	S1646	nd		NaN	TAsELLLDR
Src substrate cortactin	SRC8	Q14247	CTTN	S261	nd		0.472924	LQLHEsQKDYK
POTE ankyrin domain family member E	POTEE	Q6S8J3	POTEE	S939	0.865874	sYELPDGQVITIGNER	0.872487	sYELPDGQVITIGNER
Calmodulin-regulated spectrin-associated protein 2	CAMP2	Q08AD1	CAMSAP2	S599	0.471033	LNQSsPDNVTDTK	1.83542	LNQSsPDNVTDTK
Talin-1	TLN1	Q9Y490	TLN1	S1231	nd		NaN	LLSDSLPPsTGTFQEAQSR
Transcriptional coactivator YAP1	YAP1	P46937	YAP1	T110	0.839455	QAStDAGTAGALTPQHVR	0.858877	QAStDAGTAGALTPQHVR
Isoform Alpha of Striatin-3	STRN3	Q13033-2	STRN3	T327	NaN	SSGDGtEWAEPITFPSGGGK	4.72359	SSGDGtEWAEPITFPSGGGK
Pleckstrin homology domain-containing family A member 6	PKHA6	Q9Y2H5	PLEKHA6	T779	1.02594	TKSPtDDEVTPSAVVR	NaN	TKSPtDDEVTPSAVVR
Beta-1-syntrophin	SNTB1	Q13884	SNTB1	S87	0.785297	GAGAGHPGAGGAQPPDsPAGVR	0.954348	GAGAGHPGAGGAQPPDsPAGVR
Cdc42-interacting protein 4	CIP4	Q15642	TRIP10	S298	nd		1.37048	APSDsSLGTPSDGRPELR
Thyroid hormone receptor-associated protein 3	TR150	Q9Y2W1	THRAP3	S320	0.825325	sPPSTGSTYGSSQK; SPVGKsPPSTGSTYGSSQK	1.07712	sPPSTGSTYGSSQK; SPVGKsPPSTGSTYGSSQK
A-kinase anchor protein 11	AKA11	Q9UKA4	AKAP11	S1240	0.670446	sVSPTFLNPSDENLK	nd
Endophilin-A2	SH3G1	Q99961	SH3GL1	S288	NaN	IAASSsFR	NaN	IAASSsFR
60S acidic ribosomal protein P2	RLA2	P05387	RPLP2	S79	nd		1.69436	LASVPAGGAVAVSAAPGsAAPAAGSAPAAAEEK
Programmed cell death protein 4	PDCD4	Q53EL6	PDCD4	S94	NaN	SGLTVPTsPK	NaN	SGLTVPTsPK
Protein IWS1 homolog	IWS1	Q96ST2	IWS1	S235; S237	1.06365	HQAsDsENEELPKPR	1.40769	HQAsDsENEELPKPR
Isoform 6 of Mitogen-activated protein kinase kinase kinase kinase 4	M4K4	O95819-6	MAP4K4	S800	nd		0.782515	TMIVHDDVESEPAMTPsK
cAMP-dependent protein kinase catalytic subunit beta	KAPCB	P22694	PRKACB	T198	1.54762	TWtLCGTPEYLAPEIILSK	1.61523	TWtLCGTPEYLAPEIILSK
Serrate RNA effector molecule homolog	SRRT	Q9BXP5	SRRT	T544	nd		1.45737	TQLWASEPGtPPLPTSLPSQNPILK
BMP-2-inducible protein kinase	BMP2K	Q9NSY1	BMP2K	S1029	nd		1.22125	RDsQSSNEFLTISDSK
Heterogeneous nuclear ribonucleoprotein A3	ROA3	P51991	HNRNPA3	S356	0.883432	SsGSPYGGGYGSGGGSGGYGSR	1.03375	SsGSPYGGGYGSGGGSGGYGSR
Zinc finger CCCH domain-containing protein 13	ZC3HD	Q5T200	ZC3H13	S877	0.67957	SLsPSHLTEDR	NaN	SLsPSHLTEDR
LIM and calponin homology domains-containing protein 1	LIMC1	Q9UPQ0	LIMCH1	S207	nd		1.05115	DDSFDSLDsFGSR
Choline-phosphate cytidylyltransferase A	PCY1A	P49585	PCYT1A	S343	nd		1.42589	TsPPCSPANLSR
Gamma-adducin	ADDG	Q9UEY8	ADD3	S693	3.63953	TPsFLKK	3.01248	TPsFLKK
Isoform 6 of Mitogen-activated protein kinase kinase kinase kinase 4	M4K4	O95819-6	MAP4K4	S600	1.34138	TTSRsPVLSR	1.0494	TTSRsPVLSR
Neuroblast differentiation-associated protein AHNAK	AHNK	Q09666	AHNAK	S5841	1.29023	GHYEVTGsDDETGKLQGSGVSLASK	1.07504	GHYEVTGsDDETGKLQGSGVSLASK
BMP-2-inducible protein kinase	BMP2K	Q9NSY1	BMP2K	S1031	1.56144	RDSQsSNEFLTISDSK	nd
NCK-interacting protein with SH3 domain	SPN90	Q9NZQ3	NCKIPSD	T181	0.983345	AAPTtPPPPVK	1.28709	AAPTtPPPPVK
La-related protein 4	LARP4	Q71RC2	LARP4	S722	nd		0.841858	EQYVPPRsPK
Bcl-2-associated transcription factor 1	BCLF1	Q9NYF8	BCLAF1	S285; S290	1.00616	YsPSQNsPIHHIPSR	1.23311	YsPSQNsPIHHIPSR
RNA-binding protein 39	RBM39	Q14498	RBM39	S97	1.04311	YRsPYSGPK	1.32429	YRsPYSGPK
Fatty acid synthase	FAS	P49327	FASN	T2204	2.73963	ADEASELACPtPK	nd
60S ribosomal protein L12	RL12	P30050	RPL12	S38	NaN	IGPLGLsPK	NaN	IGPLGLsPK
Spectrin alpha chain, non-erythrocytic 1	SPTN1	Q13813	SPTAN1	S1029	nd		1.00133	LDPAQsASRENLLEEQGSIALR
Isoform 6 of Mitogen-activated protein kinase kinase kinase kinase 4	M4K4	O95819-6	MAP4K4	S324	NaN	RGEKDETEYEYsGSEEEEEEVPEQEGEPSSIVNVPGESTLR	0.695825	DETEYEYsGSEEEEEEVPEQEGEPSSIVNVPGESTLR
La-related protein 1	LARP1	Q6PKG0	LARP1	S774	NaN	SLPTTVPEsPNYR	1.05422	SLPTTVPEsPNYR
Cytospin-A	CYTSA	Q69YQ0	SPECC1L	S385; S389	nd		0.586453	KGSsGNAsEVSVACLTER
Actin filament-associated protein 1	AFAP1	Q8N556	AFAP1	S668	NaN	SGTSSPQsPVFR	1.19025	SGTSSPQsPVFR
LIM domain only protein 7	LMO7	Q8WWI1	LMO7	S867	0.708438	VTTEIQLPSQsPVEEQSPASLSSLR	0.871594	VTTEIQLPSQsPVEEQSPASLSSLR
Serine/threonine-protein kinase PAK 2	PAK2	Q13177	PAK2	S141	NaN	YLsFTPPEK	1.06931	YLsFTPPEK
Serine/arginine repetitive matrix protein 2	SRRM2	Q9UQ35	SRRM2	S2407; T2409	0.608315	sRtPPSAPSQSR	0.925164	sRtPPSAPSQSR
SWI/SNF complex subunit SMARCC1	SMRC1	Q92922	SMARCC1	S328; S330	0.799883	KHsPsPPPPTPTESR	1.27478	KHsPsPPPPTPTESR
Clathrin interactor 1	EPN4	Q14677	CLINT1	S299	nd		NaN	TIDLGAAAHYTGDKAsPDQNASTHTPQSSVK
Tight junction protein ZO-1	ZO1	Q07157	TJP1	S912	nd		NaN	IDsPGFKPASQQK
Anillin	ANLN	Q9NQW6	ANLN	S189	nd		NaN	AASPPRPLLsNASATPVGR
Lamina-associated polypeptide 2, isoforms beta/gamma	LAP2B	P42167	TMPO	S180	nd		1.42015	QNGSNDsDRYSDNEEDSKIELK
Serine/arginine repetitive matrix protein 2	SRRM2	Q9UQ35	SRRM2	S2102; T2104	0.855153	NHSGsRtPPVALNSSR	1.11524	NHSGsRtPPVALNSSR
Isoform 4 of Interleukin enhancer-binding factor 3	ILF3	Q12906-4	ILF3	T486	nd		NaN	GEDSAEEtEAKPAVVAPAPVVEAVSTPSAAFPSDATAENVK
CD44 antigen	CD44	P16070	CD44	S183	nd		NaN	TNPEDIYPSNPTDDDVSSGSsSER
Ubiquitin-associated protein 2-like	UBP2L	Q14157	UBAP2L	T495	NaN	KASLtSK	nd
Nuclear cap-binding protein subunit 1	NCBP1	Q09161	NCBP1	S22	1.11457	KTsDANETEDHLESLICK; TsDANETEDHLESLICK	1.1804	KTsDANETEDHLESLICK; TsDANETEDHLESLICK
Catenin alpha-2	CTNA2	P26232	CTNNA2	T653; S654; T657	1.47159	SRtsVQtEDDQLIAGQSAR	nd
Serine/arginine repetitive matrix protein 2	SRRM2	Q9UQ35	SRRM2	T866	0.782158	QGSITSPQANEQSVtPQRR; QGSITSPQANEQSVtPQR	0.950117	QGSITSPQANEQSVtPQRR; QGSITSPQANEQSVtPQR
Leucine-rich repeat flightless-interacting protein 2	LRRF2	Q9Y608	LRRFIP2	S332	nd		NaN	GSGDTsSLIDPDTSLSELR
Dual specificity protein kinase CLK3	CLK3	P49761	CLK3	S283	nd		1.47334	sVEDDKEGHLVCR
Serine/arginine repetitive matrix protein 1	SRRM1	Q8IYB3	SRRM1	T220	0.85832	EKtPELPEPSVK	1.14753	EKtPELPEPSVK
Signal-induced proliferation-associated protein 1	SIPA1	Q96FS4	SIPA1	S55	1.00838	SGsDAGEARPPTPASPR	1.26156	SGsDAGEARPPTPASPR
Transcription elongation factor A protein 1	TCEA1	P23193	TCEA1	S100	NaN	EPAITSQNsPEAR	1.27284	EPAITSQNsPEAR
Heat shock 70 kDa protein 4	HSP74	P34932	HSPA4	S641	nd		NaN	FVsEDDRNSFTLK
Isoform 2 of Epsin-2	EPN2	O95208-2	EPN2	S192	nd		NaN	AGGsPASYHGSTSPR
Coiled-coil domain-containing protein 86	CCD86	Q9H6F5	CCDC86	S58	0.63781	AGLGsPERPPK	0.875478	AGLGsPERPPK
Myb-binding protein 1A	MBB1A	Q9BQG0	MYBBP1A	S1163	0.68519	EIPSATQsPISK	1.15607	EIPSATQsPISK
Chromosome alignment-maintaining phosphoprotein 1	CHAP1	Q96JM3	CHAMP1	S476	NaN	GGsPDLWK	0.996922	GGsPDLWK
Rho guanine nucleotide exchange factor 11	ARHGB	O15085	ARHGEF11	S1480	1.25301	WTDGSLsPPAKEPLASDSR	0.976856	WTDGSLsPPAKEPLASDSR
Isoform 6 of Mitogen-activated protein kinase kinase kinase kinase 4	M4K4	O95819-6	MAP4K4	S771; S775	0.239526	AASsLNLsNGETESVK	0.238796	AASsLNLsNGETESVK
Plectin	PLEC	Q15149	PLEC	S4613	nd		0.791726	GYYsPYSVSGSGSTAGSR
Catenin beta-1	CTNB1	P35222	CTNNB1	S552	1.32041	RTsMGGTQQQFVEGVR	1.28377	TsMGGTQQQFVEGVR; RTsMGGTQQQFVEGVR
Isoform 6 of Mitogen-activated protein kinase kinase kinase kinase 4	M4K4	O95819-6	MAP4K4	S887; S888	nd		0.415241	HKSssSFTPFIDPR
A-kinase anchor protein 12	AKA12	Q02952	AKAP12	S1390	nd		0.942142	EVsSLEGSPPPCLGQEEAVCTK
Thyroid hormone receptor-associated protein 3	TR150	Q9Y2W1	THRAP3	S682	0.782122	IDIsPSTFR; RIDIsPSTFR	1.28883	IDIsPSTFR; RIDIsPSTFR
CD44 antigen	CD44	P16070	CD44	S706	0.830593	sQEMVHLVNK	0.937242	sQEMVHLVNK; KPSGLNGEASKsQEMVHLVNK
PH and SEC7 domain-containing protein 3	PSD3	Q9NYI0	PSD3	S1020	nd		NaN	SHSSPSLNPDTsPITAK
Serine/threonine-protein kinase MARK2	MARK2	Q7KZI7	MARK2	S212	0.82345	LDTFCGsPPYAAPELFQGK	0.959112	LDTFCGsPPYAAPELFQGK
Drebrin	DREB	Q16643	DBN1	T346	NaN	SPSDSSTAStPVAEQIER	1.42534	SPSDSSTAStPVAEQIER
Catenin alpha-2	CTNA2	P26232	CTNNA2	S654; T657	1.89718	SRTsVQtEDDQLIAGQSAR	2.21733	SRTsVQtEDDQLIAGQSAR
Rho GTPase-activating protein 22	RHG22	Q7Z5H3	ARHGAP22	S395	NaN	TSsLDGAAVAVLSR	nd
Serine/arginine-rich splicing factor 6	SRSF6	Q13247	SRSF6	S303	1.04115	SNsPLPVPPSK	1.1739	SNsPLPVPPSK
Protein LSM14 homolog A	LS14A	Q8ND56	LSM14A	S216	1.34248	sPVSTRPLPSASQK	1.39659	sPVSTRPLPSASQK
Kinesin light chain 2	KLC2	Q9H0B6	KLC2	S582	nd		NaN	ASsLNFLNK
Coiled-coil domain-containing protein 86	CCD86	Q9H6F5	CCDC86	S18	NaN	LGGLRPEsPESLTSVSR	1.12111	LGGLRPEsPESLTSVSR
Cyclin-Y	CCNY	Q8ND76	CCNY	S326	1.11376	SAsADNLTLPR	1.311	SAsADNLTLPR
E3 ubiquitin-protein ligase UHRF1	UHRF1	Q96T88	UHRF1	T93	0.416073	ERDSELSDtDSGCCLGQSESDK	nd
Heat shock protein 105 kDa	HS105	Q92598	HSPH1	S809	1.15593	IEsPKLER	1.24767	IEsPKLER
Ubiquitin carboxyl-terminal hydrolase 15	UBP15	Q9Y4E8	USP15	S229	nd		NaN	sPGASNFSTLPK
Suppressor of SWI4 1 homolog	SSF1	Q9NQ55	PPAN	S359	0.953818	VGGsDEEASGIPSR	1.10736	VGGsDEEASGIPSR
14-3-3 protein theta	1433T	P27348	YWHAQ	S230	NaN	DNLTLWTsDSAGEECDAAEGAEN	nd
Guanine nucleotide-binding protein-like 1	GNL1	P36915	GNL1	T50	nd		1.25348	REEQTDtSDGESVTHHIR
Pericentriolar material 1 protein	PCM1	Q15154	PCM1	S542	NaN	KDEETEESEYDSEHENsEPVTNIR	1.04491	KDEETEESEYDSEHENsEPVTNIR
Serine/arginine repetitive matrix protein 1	SRRM1	Q8IYB3	SRRM1	S393	0.776566	RLSPSAsPPR; LSPSAsPPR	1.03855	RLSPSAsPPR; LSPSAsPPR
RalA-binding protein 1	RBP1	Q15311	RALBP1	S92; S93	nd		1.66322	RTEGYAAFQEDssGDEAESPSK
Drebrin	DREB	Q16643	DBN1	S337; S339	nd		NaN	sPsDSSTASTPVAEQIER
60S acidic ribosomal protein P0	RLA0	P05388	RPLP0	S304	0.963804	VEAKEEsEESDEDMGFGLFD; EEsEESDEDMGFGLFD	1.276	VEAKEEsEESDEDMGFGLFD; EEsEESDEDMGFGLFD
U4/U6.U5 tri-snRNP-associated protein 1	SNUT1	O43290	SART1	S448	nd		1.87367	RVsEVEEEKEPVPQPLPSDDTR
Isoform 2 of Zinc finger Ran-binding domain-containing protein 2	ZRAB2	O95218-2	ZRANB2	S305; S307	1.04471	sRsPESQVIGENTK	1.06414	TRsRsPESQVIGENTK; sRsPESQVIGENTK
WD repeat-containing protein 20	WDR20	Q8TBZ3	WDR20	S434	1.32895	SNsLPHSAVSNAGSK	0.993731	SNsLPHSAVSNAGSK
Derlin-1	DERL1	Q9BUN8	DERL1	S143	nd		6.13954	DMIVsFWFGTR
RNA polymerase-associated protein CTR9 homolog	CTR9	Q6PD62	CTR9	T925	NaN	KGGEFDEFVNDDtDDDLPISK	1.27129	KGGEFDEFVNDDtDDDLPISK; GGEFDEFVNDDtDDDLPISK
LIM and calponin homology domains-containing protein 1	LIMC1	Q9UPQ0	LIMCH1	S233	0.810577	GSSDGRGSDsESDLPHR	1.2977	GSSDGRGSDsESDLPHR
Ataxin-2	ATX2	Q99700	ATXN2	S889	NaN	RGPEVTSQGVQTSsPACK	1.29647	RGPEVTSQGVQTSsPACK
Plectin	PLEC	Q15149	PLEC	S4626	0.444556	GYYSPYSVSGSGSTAGsR	NaN	GYYSPYSVSGSGSTAGsR
Nardilysin	NRDC	O43847	NRDC	S94	1.44568	RGsLSNAGDPEIVK	1.86198	GsLSNAGDPEIVK; RGsLSNAGDPEIVK
Isoform 2 of NADH dehydrogenase [ubiquinone] flavoprotein 3, mitochondrial	NDUV3	P56181-2	NDUFV3	S162	0.212137	KVTSPSSSSSSSSSDsESDDEADVSEVTPR	nd
Isoform 6 of Mitogen-activated protein kinase kinase kinase kinase 4	M4K4	O95819-6	MAP4K4	T597	nd		1.07752	TtSRSPVLSR
182 kDa tankyrase-1-binding protein	TB182	Q9C0C2	TNKS1BP1	S1029	NaN	GSGGLFsPSTAHVPDGALGQR	nd
Plectin	PLEC	Q15149	PLEC	S1435	0.575977	AQLEPVAsPAK	0.687831	AQLEPVAsPAK
PDZ and LIM domain protein 4	PDLI4	P50479	PDLIM4	T122	0.962211	RPSGtGTGPEDGRPSLGSPYGQPPR	nd
Bcl-2-associated transcription factor 1	BCLF1	Q9NYF8	BCLAF1	S285	0.697454	YsPSQNSPIHHIPSR	1.07365	YsPSQNSPIHHIPSR
Kinectin	KTN1	Q86UP2	KTN1	S75	0.77311	EIQNGNLHEsDSESVPR	1.28239	EIQNGNLHEsDSESVPR
Inositol 1,4,5-trisphosphate receptor type 3	ITPR3	Q14573	ITPR3	S1832	NaN	VAsFSIPGSSSR	0.59421	VAsFSIPGSSSR
Phospholipid-transporting ATPase IG	AT11C	Q8NB49	ATP11C	S1126	nd		NaN	TFsDESNVL
60S acidic ribosomal protein P2	RLA2	P05387	RPLP2	S64	1.11815	LAsVPAGGAVAVSAAPGSAAPAAGSAPAAAEEK	1.41154	LAsVPAGGAVAVSAAPGSAAPAAGSAPAAAEEK
Survival motor neuron protein	SMN	Q16637	SMN1	S28	0.767892	GTGQsDDSDIWDDTALIK	NaN	GTGQsDDSDIWDDTALIK
Spindlin interactor and repressor of chromatin-binding protein	SPNDC	Q9BUA3	SPINDOC	S248; S251	0.440496	NLDPDPEPPsPDsPTETFAAPAEVR	1.11409	NLDPDPEPPsPDsPTETFAAPAEVR
Isoform 4 of Plectin	PLEC	Q15149-4	PLEC	S21	0.452422	TSsEDNLYLAVLR	0.647659	TSsEDNLYLAVLR
Serine/threonine-protein phosphatase 6 regulatory subunit 3	PP6R3	Q5H9R7	PPP6R3	S617	1.51632	IQQFDDGGsDEEDIWEEK	1.49088	IQQFDDGGsDEEDIWEEK
Filamin-B	FLNB	O75369	FLNB	S1505	nd		0.95446	YADEEIPRsPFK
Protein EFR3 homolog A	EFR3A	Q14156	EFR3A	S219	1.05243	IGPPsSPSATDKEENPAVLAENCFR	nd
Striatin-3	STRN3	Q13033	STRN3	S202	3.74051	sLLGLSNSEPNGSVETK; VRsLLGLSNSEPNGSVETK	4.29862	sLLGLSNSEPNGSVETK; VRsLLGLSNSEPNGSVETK
AMSH-like protease	STALP	Q96FJ0	STAMBPL1	S242	nd		0.837661	SDATNYASHsPPVNR
182 kDa tankyrase-1-binding protein	TB182	Q9C0C2	TNKS1BP1	S712	nd		2.42137	DTQsPSTCSEGLLGWSQK
Kinetochore-associated protein DSN1 homolog	DSN1	Q9H410	DSN1	S81	NaN	SLHLsPQEQSASYQDR	1.36139	SLHLsPQEQSASYQDR
Filamin-A	FLNA	P21333	FLNA	S2327	2.28963	FNEEHIPDSPFVVPVAsPSGDAR	2.90273	FNEEHIPDSPFVVPVAsPSGDAR
Tensin-1	TENS1	Q9HBL0	TNS1	S1381	nd		NaN	QGsPTPALPEK
CTTNBP2 N-terminal-like protein	CT2NL	Q9P2B4	CTTNBP2NL	S560; S568	nd		6.09943	VSSPLsPLSPGIKsPTIPR
Serine/arginine repetitive matrix protein 2	SRRM2	Q9UQ35	SRRM2	S778	0.828667	sLSGSSPCPK	0.920642	sLSGSSPCPK
Cytospin-A	CYTSA	Q69YQ0	SPECC1L	S220	0.610566	AQLGINEDHsEGDEKSEK; AQLGINEDHsEGDEK	0.484503	AQLGINEDHsEGDEKSEK
Transformer-2 protein homolog beta	TRA2B	P62995	TRA2B	S264	0.75879	sPSPYYSR; RsPSPYYSR	1.06253	sPSPYYSR
LIM domain and actin-binding protein 1	LIMA1	Q9UHB6	LIMA1	S362	0.562248	SEVQQPVHPKPLsPDSR	0.6621	SEVQQPVHPKPLsPDSR
Rho guanine nucleotide exchange factor 11	ARHGB	O15085	ARHGEF11	S1519	nd		NaN	NSHELGPCPEDGSDAPLEDSTADAAAsPGP
Neuroblast differentiation-associated protein AHNAK	AHNK	Q09666	AHNAK	S210	1.07917	LPsGSGAASPTGSAVDIR	1.2891	LPsGSGAASPTGSAVDIR
Isoform 2 of Zinc finger Ran-binding domain-containing protein 2	ZRAB2	O95218-2	ZRANB2	S305; S310	1.05389	sRSPEsQVIGENTK	nd
Treacle protein	TCOF	Q13428	TCOF1	S381	1.08054	TSQVGAASAPAKEsPR	1.28037	TSQVGAASAPAKEsPR
Thyroid hormone receptor-associated protein 3	TR150	Q9Y2W1	THRAP3	S379	1.19018	GSFsDTGLGDGK	1.56323	GSFsDTGLGDGK
Drebrin	DREB	Q16643	DBN1	S312	nd		1.57555	VASASAGSCDVPsPFNHRPGSHLDSHR
Catenin alpha-2	CTNA2	P26232	CTNNA2	T653	nd		1.92839	SRtSVQTEDDQLIAGQSAR
Isoform 6 of Mitogen-activated protein kinase kinase kinase kinase 4	M4K4	O95819-6	MAP4K4	S324; S326	0.221771	GEKDETEYEYsGsEEEEEEVPEQEGEPSSIVNVPGESTLR; DETEYEYsGsEEEEEEVPEQEGEPSSIVNVPGESTLR	0.918753	GEKDETEYEYsGsEEEEEEVPEQEGEPSSIVNVPGESTLR; RGEKDETEYEYsGsEEEEEEVPEQEGEPSSIVNVPGESTLR; DETEYEYsGsEEEEEEVPEQEGEPSSIVNVPGESTLR
Myosin phosphatase Rho-interacting protein	MPRIP	Q6WCQ1	MPRIP	S1016	nd		1.31049	SKsVIEQVSWDT
Spindlin interactor and repressor of chromatin-binding protein	SPNDC	Q9BUA3	SPINDOC	T49	0.635951	tPPPRPSPLEAGSDGCEEPK	0.963419	tPPPRPSPLEAGSDGCEEPK; VTQQEKtPPPRPSPLEAGSDGCEEPK
General transcription factor IIF subunit 1	T2FA	P35269	GTF2F1	S391	nd		1.38994	GNSRPGTPsAEGGSTSSTLR
Target of Myb protein 1	TOM1	O60784	TOM1	S464	nd		2.60982	LPNLSSPsAEGPPGPPSGPAPR
Zinc finger and BTB domain-containing protein 7A	ZBT7A	O95365	ZBTB7A	S526	0.601907	GGAPDPSPGATATPGAPAQPSsPDAR	1.30417	GGAPDPSPGATATPGAPAQPSsPDAR
Protein ITPRID2	ITPI2	P28290	ITPRID2	S92	nd		0.976316	TPLGAsLDEQSSSTLK
Cyclin-dependent kinase 11A	CD11A	Q9UQ88	CDK11A	S577	NaN	EYGsPLK	NaN	EYGsPLK
A-kinase anchor protein 12	AKA12	Q02952	AKAP12	S483	NaN	LKETCVSGEDPTQGADLsPDEK	nd
Emerin	EMD	P50402	EMD	S49	5.531	RLsPPSSSAASSYSFSDLNSTR	nd
F-box only protein 46	FBX46	Q6PJ61	FBXO46	S240	nd		NaN	VAEAVAHFEAQRDsPPTK
Filamin-A	FLNA	P21333	FLNA	S1084	2.83927	AFGPGLQGGSAGsPAR	3.54371	AFGPGLQGGSAGsPAR
PHD finger protein 6	PHF6	Q8IWS0	PHF6	S155	0.91322	TAHNSEADLEESFNEHELEPSsPK	1.22636	TAHNSEADLEESFNEHELEPSsPK
Isoform Non-brain of Clathrin light chain A	CLCA	P09496-2	CLTA	S175	nd		1.93744	AAEEAFVNDIDEsSPGTEWER
RalBP1-associated Eps domain-containing protein 1	REPS1	Q96D71	REPS1	S709	2.51184	LKsEDELRPEVDEHTQK	2.11716	LKsEDELRPEVDEHTQK
C2 domain-containing protein 5	C2CD5	Q86YS7	C2CD5	S295	nd		NaN	NQTYSFsPSK
STARD3 N-terminal-like protein	STR3N	O95772	STARD3NL	S193	nd		NaN	LLIVQDAsER
Plectin	PLEC	Q15149	PLEC	S4386	0.562336	SSsVGSSSSYPISPAVSR	0.510947	SSsVGSSSSYPISPAVSR
182 kDa tankyrase-1-binding protein	TB182	Q9C0C2	TNKS1BP1	S494	1.63963	LDsPPPSPITEASEAAEAAEAGNLAVSSR	3.04466	LDsPPPSPITEASEAAEAAEAGNLAVSSR
Nucleolar protein 58	NOP58	Q9Y2X3	NOP58	S502; S514	nd		0.729415	HIKEEPLsEEEPCTSTAIAsPEK
Protein SCAF8	SCAF8	Q9UPN6	SCAF8	S617	NaN	ETVQTTQsPTPVEK	NaN	ETVQTTQsPTPVEK
Cyclin-Y-like protein 1	CCYL1	Q8N7R7	CCNYL1	T125	1.02994	YSSCStIFLDDSTVSQPNLR	nd
Filamin-A	FLNA	P21333	FLNA	S1459	2.57682	CSGPGLsPGMVR	2.65118	CSGPGLsPGMVR
Microtubule-associated protein 1B	MAP1B	P46821	MAP1B	S1817	nd		NaN	TATCHSsSSPPIDAASAEPYGFR
FK506-binding protein 15	FKB15	Q5T1M5	FKBP15	S960	nd		1.26364	RPSQEQsASASSGQPQAPLNR
Serine/arginine repetitive matrix protein 2	SRRM2	Q9UQ35	SRRM2	S1384	0.81654	SSGHSSsELSPDAVEK	1.05256	SSGHSSsELSPDAVEK
Plectin	PLEC	Q15149	PLEC	S125	0.430506	TPHVQAVQGPLGsPPKR	0.824255	TPHVQAVQGPLGsPPK
Protein transport protein Sec31A	SC31A	O94979	SEC31A	S799	0.60731	AQGEPVAGHEsPKIPYEK	0.792272	AQGEPVAGHEsPKIPYEK
Microtubule-associated protein 1B	MAP1B	P46821	MAP1B	T1949	nd		1.57774	TTRtPEEGGYSYDISEK; tPEEGGYSYDISEK
Myosin phosphatase Rho-interacting protein	MPRIP	Q6WCQ1	MPRIP	S993	NaN	SKsNPDFLK	0.753485	SKsNPDFLKK
Zinc finger MYM-type protein 4	ZMYM4	Q5VZL5	ZMYM4	S122	nd		1.05553	VTQHEsDNENEIQIQNK
Isoform Non-brain of Clathrin light chain A	CLCA	P09496-2	CLTA	S176	NaN	AAEEAFVNDIDESsPGTEWER	1.93744	AAEEAFVNDIDESsPGTEWER
Myb-binding protein 1A	MBB1A	Q9BQG0	MYBBP1A	S1267	0.758543	NQKPSQVNGAPGsPTEPAGQK	1.23826	NQKPSQVNGAPGsPTEPAGQK
Microtubule-associated protein 1B	MAP1B	P46821	MAP1B	S831; S832	nd		1.27909	SLMssPEDLTK
PHD and RING finger domain-containing protein 1	PHRF1	Q9P1Y6	PHRF1	S915	nd		0.986917	GAVAAEGAsDTEREEPTESQGLAAR
Serine/threonine-protein kinase N2	PKN2	Q16513	PKN2	S583	0.850545	ASsLGEIDESSELR	1.01396	ASsLGEIDESSELR
Proline-, glutamic acid- and leucine-rich protein 1	PELP1	Q8IZL8	PELP1	S481	nd		0.730934	GsPDGSLQTGKPSAPK
Signal-induced proliferation-associated protein 1	SIPA1	Q96FS4	SIPA1	S67	1.00838	SGSDAGEARPPTPAsPR	1.26156	SGSDAGEARPPTPAsPR
Serine/arginine-rich splicing factor 9	SRSF9	Q13242	SRSF9	S216	NaN	GSPHYFsPFRPY	1.32521	GSPHYFsPFRPY
Integrin alpha-5	ITA5	P08648	ITGA5	S127	nd		NaN	LLESSLSsSEGEEPVEYK
Nexilin	NEXN	Q0ZGT2	NEXN	S365	0.492017	TIsQEFLTPGK	0.503821	TIsQEFLTPGK
Vimentin	VIME	P08670	VIM	S73	2.62449	LRSsVPGVR	1.44658	LRSsVPGVR
Spindlin interactor and repressor of chromatin-binding protein	SPNDC	Q9BUA3	SPINDOC	S148	nd		0.863709	AEQPsPPNSDSGQDAHPDPDANPDAAR
Microtubule-associated protein 1B	MAP1B	P46821	MAP1B	S1785	nd		NaN	SDIsPLTPR
Transformer-2 protein homolog beta	TRA2B	P62995	TRA2B	S266	0.756168	SPsPYYSR; RSPsPYYSR	1.0806	SPsPYYSR; RSPsPYYSR
cAMP-dependent protein kinase type II-alpha regulatory subunit	KAP2	P13861	PRKAR2A	S78; S80	1.03404	VADAKGDsEsEEDEDLEVPVPSR	1.22216	VADAKGDsEsEEDEDLEVPVPSR
Isoform 2 of Zinc finger protein 185	ZN185	O15231-2	ZNF185	S66	1.16277	STGsPTQETQAPFIAK	1.39725	STGsPTQETQAPFIAK
Serine/arginine repetitive matrix protein 1	SRRM1	Q8IYB3	SRRM1	T406	0.74232	HRPSPPAtPPPK	nd
Microtubule-associated protein 1B	MAP1B	P46821	MAP1B	S1792; S1793	nd		1.71202	EssPLYSPTFSDSTSAVK
Telomeric repeat-binding factor 2-interacting protein 1	TE2IP	Q9NYB0	TERF2IP	S203	nd		0.95158	YLLGDAPVsPSSQK
Coiled-coil domain-containing protein 86	CCD86	Q9H6F5	CCDC86	S102	nd		0.824199	QQDLHLEsPQR
PDZ and LIM domain protein 4	PDLI4	P50479	PDLIM4	S120	0.990533	RPsGTGTGPEDGRPSLGSPYGQPPR	1.64995	RPsGTGTGPEDGRPSLGSPYGQPPR
PHD and RING finger domain-containing protein 1	PHRF1	Q9P1Y6	PHRF1	S1124	nd		NaN	ECsPTSSLER
UV excision repair protein RAD23 homolog B	RD23B	P54727	RAD23B	S160	1.25859	QEKPAEKPAETPVATsPTATDSTSGDSSR	1.67466	QEKPAEKPAETPVATsPTATDSTSGDSSR
CTTNBP2 N-terminal-like protein	CT2NL	Q9P2B4	CTTNBP2NL	S568	4.2255	VSSPLSPLSPGIKsPTIPR	5.35097	VSSPLSPLSPGIKsPTIPR
Protein phosphatase 1 regulatory subunit 12A	MYPT1	O14974	PPP1R12A	S862; S871	nd		NaN	STGVSFWTQDsDENEQEQQsDTEEGSNKK
Catenin alpha-2	CTNA2	P26232	CTNNA2	T657	nd		2.61367	TSVQtEDDQLIAGQSAR
Epidermal growth factor receptor kinase substrate 8-like protein 2	ES8L2	Q9H6S3	EPS8L2	S570	nd		0.570435	YWGPAsPTHK
Leucine-rich repeat flightless-interacting protein 1	LRRF1	Q32MZ4	LRRFIP1	S124	nd		2.25437	RGSGDTsISIDTEASIR
Isoform 5 of Caldesmon	CALD1	Q05682-5	CALD1	S196	0.983807	RGsIGENQIK; RGsIGENQIKDEK	1.08902	RGsIGENQIK; RGsIGENQIKDEK
Monocarboxylate transporter 1	MOT1	P53985	SLC16A1	S467	1.65602	KESKEEETsIDVAGKPNEVTK	NaN	EEETsIDVAGKPNEVTK
Filamin-A	FLNA	P21333	FLNA	T2336	5.13015	RLtVSSLQESGLK	NaN	RLtVSSLQESGLK
Smoothelin	SMTN	P53814	SMTN	S514	nd		NaN	VNsPGTLAR
Glutamine--fructose-6-phosphate aminotransferase [isomerizing] 1	GFPT1	Q06210	GFPT1	T262	nd		1.02712	VDStTCLFPVEEK
Drebrin	DREB	Q16643	DBN1	S341; S342	nd		1.36626	SPSDssTASTPVAEQIER
CAD protein	PYR1	P27708	CAD	S1859	0.865225	IHRAsDPGLPAEEPK	0.616718	IHRAsDPGLPAEEPK
Leucine-rich repeat-containing protein 47	LRC47	Q8N1G4	LRRC47	T522	NaN	EEGSLSDtEADAVSGQLPDPTTNPSAGK	nd
Calcium-regulated heat-stable protein 1	CHSP1	Q9Y2V2	CARHSP1	S41	NaN	GNVVPsPLPTR	1.26896	GNVVPsPLPTR
La-related protein 1	LARP1	Q6PKG0	LARP1	S627; S631	nd		1.35257	NTFTAWsDEEsDYEIDDRDVNK
A-kinase anchor protein 11	AKA11	Q9UKA4	AKAP11	S1242	0.670446	SVsPTFLNPSDENLK	0.816383	SVsPTFLNPSDENLK
Protein bicaudal C homolog 1	BICC1	Q9H694	BICC1	S612	nd		1.77833	VLSANHGDPSIQTSGSEQTsPK
RNA-binding protein 34	RBM34	P42696	RBM34	S28	nd		1.76108	SVQEGENPDDGVRGsPPEDYR
Synaptopodin	SYNPO	Q8N3V7	SYNPO	S685	NaN	DRAsPAAAEEVVPEWASCLK	0.530889	DRAsPAAAEEVVPEWASCLK
WD repeat-containing protein 26	WDR26	Q9H7D7	WDR26	S121	0.808064	RLsQSDEDVIR	0.90889	RLsQSDEDVIR
Palmitoyltransferase ZDHHC5	ZDHC5	Q9C0B5	ZDHHC5	S380	1.01354	GDsLKEPTSIAESSR	1.01934	GDsLKEPTSIAESSR
Zinc finger CCCH domain-containing protein 13	ZC3HD	Q5T200	ZC3H13	T364	NaN	TLtPPLR	2.21288	TLtPPLR
Zinc finger E-box-binding homeobox 1	ZEB1	P37275	ZEB1	S322	nd		3.84777	TSQCSSPSLSASPGsPTRPQIR
Splicing factor 3B subunit 2	SF3B2	Q13435	SF3B2	S307; S309	nd		0.960079	SSLGQsAsETEEDTVSVSK
Splicing factor 3B subunit 2	SF3B2	Q13435	SF3B2	S309	0.780315	SSLGQSAsETEEDTVSVSK	0.972449	SSLGQSAsETEEDTVSVSK
Neuroblast differentiation-associated protein AHNAK	AHNK	Q09666	AHNAK	T5798	nd		1.88529	EFSGPSTPTGtLEFEGGEVSLEGGK
SH2 domain-containing protein 4A	SH24A	Q9H788	SH2D4A	S315	NaN	TLsSSAQEDIIR	nd
Serine/arginine repetitive matrix protein 2	SRRM2	Q9UQ35	SRRM2	T2104	1.05798	tPPVALNSSR	1.20175	tPPVALNSSR
G-rich sequence factor 1	GRSF1	Q12849	GRSF1	S244	NaN	SsPVVNDGVVR	NaN	SsPVVNDGVVR
Phostensin	PPR18	Q6NYC8	PPP1R18	S224	1.02259	LsPGESAYQK	1.18861	LsPGESAYQK
Protein scribble homolog	SCRIB	Q14160	SCRIB	S1445	NaN	QsPASPPPLGGGAPVR	NaN	QsPASPPPLGGGAPVR
Myosin-10	MYH10	P35580	MYH10	S1956	NaN	QLHLEGASLELsDDDTESK	1.69783	QLHLEGASLELsDDDTESK
Catenin delta-1	CTND1	O60716	CTNND1	S346; S349	0.600384	GsLAsLDSLR	NaN	GsLAsLDSLR
Spectrin beta chain, non-erythrocytic 1	SPTB2	Q01082	SPTBN1	S2161; S2164	nd		0.572946	TSsKEsSPIPSPTSDR
Microtubule cross-linking factor 1	MTCL1	Q9Y4B5	MTCL1	T1417; S1421	nd		NaN	EDVtPPLsPDDLK
Gamma-adducin	ADDG	Q9UEY8	ADD3	S683	1.43505	IEEVLSPEGSPSKSPsK	2.26003	IEEVLSPEGSPSKSPsK
Supervillin	SVIL	O95425	SVIL	S221	NaN	QAHDLsPAAESSSTFSFSGR	0.612352	QAHDLsPAAESSSTFSFSGR
Transcription intermediary factor 1-beta	TIF1B	Q13263	TRIM28	T34	NaN	StAPSAAASASASAAASSPAGGGAEALELLEHCGVCR	nd
Microtubule-associated protein 1B	MAP1B	P46821	MAP1B	T2034	nd		1.00839	tPDTSTYCYETAEK
Anillin	ANLN	Q9NQW6	ANLN	S182	NaN	AAsPPRPLLSNASATPVGR	nd
CCR4-NOT transcription complex subunit 2	CNOT2	Q9NZN8	CNOT2	S165	nd		1.45038	TNSMSSSGLGsPNR
A-kinase anchor protein 12	AKA12	Q02952	AKAP12	S286	1.6487	SAESPTsPVTSETGSTFK	nd
Treacle protein	TCOF	Q13428	TCOF1	S1378	0.893326	KLGAGEGGEASVsPEK; LGAGEGGEASVsPEK	1.15673	KLGAGEGGEASVsPEK; LGAGEGGEASVsPEK
Inactive tyrosine-protein kinase PEAK1	PEAK1	Q9H792	PEAK1	S572	nd		1.04873	SAPTsPTATNISSK
Protein kinase C and casein kinase substrate in neurons protein 3	PACN3	Q9UKS6	PACSIN3	S354	nd		2.23352	DGTAPPPQSPGSPGTGQDEEWsDEESPRK
LIM domain and actin-binding protein 1	LIMA1	Q9UHB6	LIMA1	S726	nd		NaN	sQDVELWEGEVVK
Cyclin-dependent kinase 1	CDK1	P06493	CDK1	T161	NaN	VYtHEVVTLWYR	nd
Serine/arginine repetitive matrix protein 2	SRRM2	Q9UQ35	SRRM2	S954	0.838904	SVsPCSNVESR	1.00968	SVsPCSNVESR
Disintegrin and metalloproteinase domain-containing protein 17	ADA17	P78536	ADAM17	S791	nd		1.50488	sFEDLTDHPVTR
Junction plakoglobin	PLAK	P14923	JUP	S665	0.84884	RVsVELTNSLFK	1.18135	RVsVELTNSLFK
Golgi-specific brefeldin A-resistance guanine nucleotide exchange factor 1	GBF1	Q92538	GBF1	S1318	1.02841	GYTsDSEVYTDHGRPGK	nd
Isoform 6 of Mitogen-activated protein kinase kinase kinase kinase 4	M4K4	O95819-6	MAP4K4	T319	NaN	DEtEYEYSGSEEEEEEVPEQEGEPSSIVNVPGESTLR	nd
Isoform 6 of Mitogen-activated protein kinase kinase kinase kinase 4	M4K4	O95819-6	MAP4K4	T880	NaN	LTANETQSASStLQK	nd
Glutamate receptor ionotropic, kainate 5	GRIK5	Q16478	GRIK5	S756	nd		13.0887	GYGIGMPLGsPFR
Monocarboxylate transporter 1	MOT1	P53985	SLC16A1	S213	nd		NaN	DKSKAsLEK
Splicing factor 45	SPF45	Q96I25	RBM17	S222	nd		0.834251	sPTGPSNSFLANMGGTVAHK
TP53-binding protein 1	TP53B	Q12888	TP53BP1	S1462	NaN	SDsPEIPFQAAAGPSDGLDASSPGNSFVGLR	nd
Uncharacterized protein C18orf25	CR025	Q96B23	C18orf25	S67	1.5385	RDSsESQLASTESDKPTTGR	1.83809	RDSsESQLASTESDKPTTGR
Nexilin	NEXN	Q0ZGT2	NEXN	S218	nd		NaN	YEEQRPsLK
Isoform 6 of Mitogen-activated protein kinase kinase kinase kinase 4	M4K4	O95819-6	MAP4K4	S519	nd		0.230647	SKPsFHAPEPK
Eukaryotic translation initiation factor 5B	IF2P	O60841	EIF5B	S214	1.12849	NKPGPNIEsGNEDDDASFK	1.11713	NKPGPNIEsGNEDDDASFK
Neuroblast differentiation-associated protein AHNAK	AHNK	Q09666	AHNAK	S135	1.66927	LKsEDGVEGDLGETQSR	1.59731	LKsEDGVEGDLGETQSR
Catenin alpha-2	CTNA2	P26232	CTNNA2	T653; S654	nd		2.2907	SRtsVQTEDDQLIAGQSAR
Acidic leucine-rich nuclear phosphoprotein 32 family member B	AN32B	Q92688	ANP32B	T244	NaN	KREtDDEGEDD	nd
Mediator of DNA damage checkpoint protein 1	MDC1	Q14676	MDC1	S168	nd		NaN	LLLAEDsEEEVDFLSER
Leucine-rich repeat flightless-interacting protein 2	LRRF2	Q9Y608	LRRFIP2	S333	nd		0.64612	GSGDTSsLIDPDTSLSELR
Drebrin	DREB	Q16643	DBN1	T331	0.970215	MAPtPIPTRSPSDSSTASTPVAEQIER	nd
Striatin-interacting protein 2	STRP2	Q9ULQ0	STRIP2	S321	1.95512	AASPPsYTLDLGESQLAPPPSK	NaN	AASPPsYTLDLGESQLAPPPSK
DnaJ homolog subfamily C member 5	DNJC5	Q9H3Z4	DNAJC5	S8	nd		1.01099	sLSTSGESLYHVLGLDK
ATPase MORC2	MORC2	Q9Y6X9	MORC2	S615	nd		1.27758	sPPLPAVIR
Hepatoma-derived growth factor	HDGF	P51858	HDGF	S132; S133	0.972824	GNAEGssDEEGKLVIDEPAK; KGNAEGssDEEGKLVIDEPAK	1.03264	GNAEGssDEEGKLVIDEPAK; KGNAEGssDEEGKLVIDEPAK
Interferon-inducible double-stranded RNA-dependent protein kinase activator A	PRKRA	O75569	PRKRA	S18	2.12657	EDsGTFSLGK	NaN	EDsGTFSLGK
Isoform 8 of Filamin-B	FLNB	O75369-8	FLNB	S1474	nd		1.27779	ADDTDSQSWRsPLK
Vimentin	VIME	P08670	VIM	S325	0.709294	QVQsLTCEVDALK	0.403459	QVQsLTCEVDALK
Spindlin interactor and repressor of chromatin-binding protein	SPNDC	Q9BUA3	SPINDOC	S82	1.04007	QQVSWEQEFLVGSsPGGSGR	1.05279	QQVSWEQEFLVGSsPGGSGR
182 kDa tankyrase-1-binding protein	TB182	Q9C0C2	TNKS1BP1	S429	3.0925	RFsEGVLQSPSQDQEK	2.13775	RFsEGVLQSPSQDQEK
Vinexin	VINEX	O60504	SORBS3	S530	nd		NaN	LCDDGPQLPTsPR
Ubiquitin-associated protein 2-like	UBP2L	Q14157	UBAP2L	S454	1.48883	SPAVATSTAAPPPPSsPLPSK	1.36517	SPAVATSTAAPPPPSsPLPSK
LIM domain and actin-binding protein 1	LIMA1	Q9UHB6	LIMA1	S490	0.550504	ETPHsPGVEDAPIAK	0.633929	ETPHsPGVEDAPIAK
Signal-induced proliferation-associated 1-like protein 3	SI1L3	O60292	SIPA1L3	S1544	NaN	TLsDESLCSGR	1.27261	TLsDESLCSGR
Cyclin-dependent kinase 12	CDK12	Q9NYV4	CDK12	S423	nd		NaN	GsPVFLPR
Nucleophosmin	NPM	P06748	NPM1	S125	1.0439	CGSGPVHISGQHLVAVEEDAEsEDEEEEDVK	1.39744	CGSGPVHISGQHLVAVEEDAEsEDEEEEDVK
Epsin-1	EPN1	Q9Y6I3	EPN1	S447	nd		1.774	GsLAEAVGSPPPAATPTPTPPTR
60S ribosomal protein L23a	RL23A	P62750	RPL23A	S43	nd		1.0007	IRTsPTFR
cAMP-dependent protein kinase catalytic subunit beta	KAPCB	P22694	PRKACB	T202	nd		1.54262	TWTLCGtPEYLAPEIILSK
Serine/arginine repetitive matrix protein 2	SRRM2	Q9UQ35	SRRM2	S1048	nd		1.03826	SSTPPGEsYFGVSSLQLK
Structural maintenance of chromosomes protein 4	SMC4	Q9NTJ3	SMC4	T44	nd		NaN	TESPAtAAETASEELDNR
Filamin-B	FLNB	O75369	FLNB	S2478	0.920671	LVsPGSANETSSILVESVTR	1.01657	LVsPGSANETSSILVESVTR
Drebrin	DREB	Q16643	DBN1	S345; T346	nd		0.916007	SPSDSSTAstPVAEQIER
Alpha-actinin-1	ACTN1	P12814	ACTN1	S140	0.728385	FAIQDIsVEETSAK	0.663578	FAIQDIsVEETSAK
G-protein coupled receptor family C group 5 member C	GPC5C	Q9NQ84	GPRC5C	S383	3.02673	VPsEGAYDIILPR	NaN	VPsEGAYDIILPR
Isoform 6 of Mitogen-activated protein kinase kinase kinase kinase 4	M4K4	O95819-6	MAP4K4	S679	NaN	SsSKSEGSPSQR	nd
Gamma-adducin	ADDG	Q9UEY8	ADD3	S677; S683	NaN	IEEVLSPEGsPSKSPsK	nd
Uncharacterized protein C7orf50	CG050	Q9BRJ6	C7orf50	S175	1.03053	ELDEEGsDPPLPGR	1.37766	ELDEEGsDPPLPGR
Microtubule-associated protein 1B	MAP1B	P46821	MAP1B	T1067	1.69371	AAEAGGAEEQYGFLTtPTK	1.25933	AAEAGGAEEQYGFLTtPTK
Vimentin	VIME	P08670	VIM	S55	2.54013	SLYAsSPGGVYATR	1.85426	SLYAsSPGGVYATR
RNA-binding protein 14	RBM14	Q96PK6	RBM14	T206	0.520937	QPtPPFFGR	0.97541	QPtPPFFGR
HMG box transcription factor BBX	BBX	Q8WY36	BBX	S844	nd		2.55027	TADGRVsPAGGTLDDKPK
Protein PRRC2C	PRC2C	Q9Y520	PRRC2C	S1249	nd		NaN	SESsDFEVVPK
Serine/arginine repetitive matrix protein 2	SRRM2	Q9UQ35	SRRM2	S1103	1.01266	SSsPVTELASR	0.986932	SSsPVTELASR
Target of EGR1 protein 1	TOE1	Q96GM8	TOE1	S5	NaN	AADsDDGAVSAPAASDGGVSK	1.43041	AADsDDGAVSAPAASDGGVSK
Protein phosphatase Slingshot homolog 1	SSH1	Q8WYL5	SSH1	S576	nd		NaN	KLEFGsPK
LIM domain only protein 7	LMO7	Q8WWI1	LMO7	S276	0.245117	EGFEsDTDSEFTFK	0.439396	EGFEsDTDSEFTFK
Target of Myb protein 1	TOM1	O60784	TOM1	S355	NaN	AGLQsLEASGR	0.711122	AGLQsLEASGR
THUMP domain-containing protein 1	THUM1	Q9NXG2	THUMPD1	S86; S88	0.76012	FTDKDQQPsGsEGEDDDAEAALKK	0.957777	FTDKDQQPsGsEGEDDDAEAALKK
Probable 28S rRNA (cytosine(4447)-C(5))-methyltransferase	NOP2	P46087	NOP2	S732	0.867957	GTDTQTPAVLsPSK	1.19193	GTDTQTPAVLsPSK
Thyroid hormone receptor-associated protein 3	TR150	Q9Y2W1	THRAP3	S243	0.924475	ASAVSELsPR	1.19531	ASAVSELsPR
DNA replication licensing factor MCM2	MCM2	P49736	MCM2	S27	0.91156	GNDPLTSsPGR	0.8699	RGNDPLTSsPGR; GNDPLTSsPGR
WW domain-containing adapter protein with coiled-coil	WAC	Q9BTA9	WAC	S523	nd		2.52171	sPSPGPNHTSNSSNASNATVVPQNSSAR
Bcl-2-associated transcription factor 1	BCLF1	Q9NYF8	BCLAF1	S512	0.868988	LKDLFDYsPPLHK; DLFDYsPPLHK	1.36693	LKDLFDYsPPLHK; DLFDYsPPLHK
Cadherin-9	CADH9	Q9ULB4	CDH9	S648	0.59928	KKEPLIIsK	1.5389	KKEPLIIsK
Microtubule-associated protein 1B	MAP1B	P46821	MAP1B	S1779	2.01837	VQSLEGEKLsPK	1.57315	VQSLEGEKLsPK
Sequestosome-1	SQSTM	Q13501	SQSTM1	S272	1.35254	LTPVsPESSSTEEK	1.61481	LTPVsPESSSTEEK
Fragile X mental retardation syndrome-related protein 2	FXR2	P51116	FXR2	S601; S603	nd		0.816975	TDGsIsGDRQPVTVADYISR
La-related protein 1	LARP1	Q6PKG0	LARP1	S847	NaN	TAsISSSPSEGTPTVGSYGCTPQSLPK	nd
Glutamine--fructose-6-phosphate aminotransferase [isomerizing] 1	GFPT1	Q06210	GFPT1	S261	nd		0.997254	VDsTTCLFPVEEK
LIM domain only protein 7	LMO7	Q8WWI1	LMO7	S257	nd		NaN	sLTSCSSDITLR
Centrin-2	CETN2	P41208	CETN2	S20	1.45149	RMsPKPELTEEQK	2.73438	RMsPKPELTEEQK
Drebrin	DREB	Q16643	DBN1	S337	1.11524	sPSDSSTASTPVAEQIER; MAPTPIPTRsPSDSSTASTPVAEQIER	1.42914	sPSDSSTASTPVAEQIER; MAPTPIPTRsPSDSSTASTPVAEQIER
182 kDa tankyrase-1-binding protein	TB182	Q9C0C2	TNKS1BP1	S987	nd		NaN	SFGTRPLSSGFsPEEAQQQDEEFEK
Rho guanine nucleotide exchange factor 11	ARHGB	O15085	ARHGEF11	T1461; T1462	NaN	SLGGESSGGttPVGSFHTEAAR	1.38631	SLGGESSGGttPVGSFHTEAAR
Heterogeneous nuclear ribonucleoprotein A1	ROA1	P09651	HNRNPA1	S6	0.97805	SEsPKEPEQLR; SEsPKEPEQLRK	1.35688	SEsPKEPEQLR; SEsPKEPEQLRK
Unconventional myosin-XVIIIa	MY18A	Q92614	MYO18A	S2041; S2043	1.08733	YSHSYLsDsDTEAK	1.56604	YSHSYLsDsDTEAK
Calcium-regulated heat-stable protein 1	CHSP1	Q9Y2V2	CARHSP1	S52	NaN	TFsATVR	NaN	TFsATVR
Forkhead box protein K1	FOXK1	P85037	FOXK1	S445	nd		0.873768	EGsPIPHDPEFGSK
RNA-binding protein 15	RBM15	Q96T37	RBM15	T568	NaN	DRtPPLLYR	1.19412	DRtPPLLYR
Zyxin	ZYX	Q15942	ZYX	S344	0.75598	sPGAPGPLTLK	NaN	sPGAPGPLTLK
RNA-binding protein 39	RBM39	Q14498	RBM39	S136	0.771121	DKsPVREPIDNLTPEER	1.21496	DKsPVREPIDNLTPEER
Myosin light chain kinase, smooth muscle	MYLK	Q15746	MYLK	S947	2.04364	VHsPQQVDFR; KVHsPQQVDFR	0.217588	VHsPQQVDFR; KVHsPQQVDFR
La-related protein 4	LARP4	Q71RC2	LARP4	S597	0.732801	ASTAsPCNNNINAATAVALQEPR	0.915745	ASTAsPCNNNINAATAVALQEPR
Eukaryotic translation initiation factor 5B	IF2P	O60841	EIF5B	S190	0.807734	INSSGESGDEsDEFLQSR	1.03782	INSSGESGDEsDEFLQSR
Striatin-interacting protein 1	STRP1	Q5VSL9	STRIP1	S339	nd		3.48657	AASPPAsASDLIEQQQK
Interferon regulatory factor 2-binding protein 2	I2BP2	Q7Z5L9	IRF2BP2	S360	nd		1.91277	RKPsPEPEGEVGPPK
Probable E3 ubiquitin-protein ligase IRF2BPL	I2BPL	Q9H1B7	IRF2BPL	S547	0.887176	KAsPEPPDSAEGALK	1.87492	KAsPEPPDSAEGALK
Serine/arginine repetitive matrix protein 2	SRRM2	Q9UQ35	SRRM2	S1382	NaN	SSGHsSSELSPDAVEK	nd
Pre-mRNA 3'-end-processing factor FIP1	FIP1	Q6UN15	FIP1L1	S492; S500	nd		1.37508	DHsPTPSVFNsDEER
Ribonucleases P/MRP protein subunit POP1	POP1	Q99575	POP1	S730	NaN	VQAYEEPSVASsPNGK	nd
Leucine-rich repeat flightless-interacting protein 2	LRRF2	Q9Y608	LRRFIP2	S324	NaN	NSASATTPLSGNSsR	1.2501	NSASATTPLSGNSsR
Ras-related protein R-Ras2	RRAS2	P62070	RRAS2	S186	1.28476	KFQEQECPPsPEPTR; FQEQECPPsPEPTR; FQEQECPPsPEPTRK	2.02542	KFQEQECPPsPEPTR; FQEQECPPsPEPTR; KFQEQECPPsPEPTRK
RNA-binding protein 10	RBM10	P98175	RBM10	S736; S738	nd		1.92617	GLVAAYSGEsDsEEEQER
Prelamin-A/C	LMNA	P02545	LMNA	S390	0.762156	LRLsPSPTSQR	1.26439	LRLsPSPTSQR
Serine/arginine repetitive matrix protein 2	SRRM2	Q9UQ35	SRRM2	S2067; S2071	0.62002	sLTRsPPAIR	nd
Coordinator of PRMT5 and differentiation stimulator	COPRS	Q9NQ92	COPRS	S66	0.885112	GTQSIPNDsPAR	1.13777	GTQSIPNDsPAR
E1A-binding protein p400	EP400	Q96L91	EP400	S736	nd		NaN	ALsPVTSR
DNA replication licensing factor MCM2	MCM2	P49736	MCM2	S139	0.83119	GLLYDsDEEDEERPAR	0.862942	GLLYDsDEEDEERPAR
Nuclease-sensitive element-binding protein 1	YBOX1	P67809	YBX1	S165; S176	nd		1.13152	NYQQNYQNsESGEKNEGSEsAPEGQAQQR
LIM domain only protein 7	LMO7	Q8WWI1	LMO7	S988; T990	1.2365	LPsPtSPFSSLSQDQAATSK; EVAATEEDVTRLPsPtSPFSSLSQDQAATSK	1.49718	LPsPtSPFSSLSQDQAATSK; EVAATEEDVTRLPsPtSPFSSLSQDQAATSK
Ubiquitin carboxyl-terminal hydrolase 10	UBP10	Q14694	USP10	S576	NaN	NHSVNEEEQEEQGEGsEDEWEQVGPR	NaN	NHSVNEEEQEEQGEGsEDEWEQVGPR
Very-long-chain (3R)-3-hydroxyacyl-CoA dehydratase 3	HACD3	Q9P035	HACD3	S114	0.457748	WLDEsDAEMELR	1.11623	WLDEsDAEMELR
Ubiquitin carboxyl-terminal hydrolase 10	UBP10	Q14694	USP10	S365	nd		NaN	YsPPAISPLVSEK
Ubiquitin-associated protein 2-like	UBP2L	Q14157	UBAP2L	S467	nd		1.13466	STSAPQMsPGSSDNQSSSPQPAQQK
Septin-9	SEPT9	Q9UHD8	SEPT9	S30	nd		1.15149	sFEVEEVETPNSTPPR
YTH domain-containing protein 1	YTDC1	Q96MU7	YTHDC1	S308	0.754018	GIsPIVFDR	1.08788	GIsPIVFDR
Discoidin, CUB and LCCL domain-containing protein 2	DCBD2	Q96PD2	DCBLD2	S726	1.53986	TDSCsSAQAQYDTPK	nd
Cyclin-T2	CCNT2	O60583	CCNT2	S480	nd		1.19409	QGQSQAASSSSVTsPIK
Semaphorin-4B	SEM4B	Q9NPR2	SEMA4B	S793	nd		2.05072	GYQSLSDsPPGSR
Protein scribble homolog	SCRIB	Q14160	SCRIB	S1448	nd		NaN	QSPAsPPPLGGGAPVR
PDZ and LIM domain protein 4	PDLI4	P50479	PDLIM4	S112	0.959614	IHIDPEIQDGsPTTSR	0.921989	IHIDPEIQDGsPTTSR
Isoform 4 of Interleukin enhancer-binding factor 3	ILF3	Q12906-4	ILF3	S482	nd		NaN	DSSKGEDsAEETEAKPAVVAPAPVVEAVSTPSAAFPSDATAENVK
Putative annexin A2-like protein	AXA2L	A6NMY6	ANXA2P2	S12	0.90838	LsLEGDHSTPPSAYGSVK	1.19889	LsLEGDHSTPPSAYGSVK
Rho guanine nucleotide exchange factor 11	ARHGB	O15085	ARHGEF11	S1458	nd		0.98099	SLGGESsGGTTPVGSFHTEAAR
Supervillin	SVIL	O95425	SVIL	S245	0.504103	DSSFTEVPRsPK	0.68793	DSSFTEVPRsPK
Nuclear ubiquitous casein and cyclin-dependent kinase substrate 1	NUCKS	Q9H1E3	NUCKS1	S181	1.03074	ATVTPsPVK	0.840951	ATVTPsPVK
Rho guanine nucleotide exchange factor 11	ARHGB	O15085	ARHGEF11	T1461	1.52028	SLGGESSGGtTPVGSFHTEAAR	nd
ATP-binding cassette sub-family F member 1	ABCF1	Q8NE71	ABCF1	S109	1.17258	LSVPTsDEEDEVPAPKPR	0.889088	LSVPTsDEEDEVPAPKPR
Emerin	EMD	P50402	EMD	S52	5.531	RLSPPsSSAASSYSFSDLNSTR	3.75049	RLSPPsSSAASSYSFSDLNSTR
Heterogeneous nuclear ribonucleoproteins A2/B1	ROA2	P22626	HNRNPA2B1	S259	NaN	GFGDGYNGYGGGPGGGNFGGsPGYGGGR	1.61082	GFGDGYNGYGGGPGGGNFGGsPGYGGGR
Protein phosphatase 1 regulatory subunit 12A	MYPT1	O14974	PPP1R12A	S862	nd		NaN	STGVSFWTQDsDENEQEQQSDTEEGSNKK
BEN domain-containing protein 3	BEND3	Q5T5X7	BEND3	S489	nd		NaN	INDELEGLGLDAGsEGDPPRDDCYDSSSLPDDISVVK
Isoform 2 of A-kinase anchor protein 2	AKAP2	Q9Y2D5-5	AKAP2	S84	NaN	SEGDNYSATLLEPAASSLsPDHK	1.60342	SEGDNYSATLLEPAASSLsPDHK
Beta-1-syntrophin	SNTB1	Q13884	SNTB1	S389	4.53422	GsPQAGVDLSFATR	NaN	GsPQAGVDLSFATR
Tyrosine-protein phosphatase non-receptor type 12	PTN12	Q05209	PTPN12	S435	nd		NaN	NLsFEIK
RB1-inducible coiled-coil protein 1	RBCC1	Q8TDY2	RB1CC1	S653	1.09636	ASVSQTSPQSASsPR	0.89716	ASVSQTSPQSASsPR
Coatomer subunit beta'	COPB2	P35606	COPB2	S859	1.20702	STAQQELDGKPAsPTPVIVASHTANK; STAQQELDGKPAsPTPVIVASHTANKEEK	1.37524	STAQQELDGKPAsPTPVIVASHTANK
Crossover junction endonuclease MUS81	MUS81	Q96NY9	MUS81	S95	nd		1.58768	TSGGDHAPDsPSGENSPAPQGR
Isoform 2 of Spectrin beta chain, non-erythrocytic 1	SPTB2	Q01082-3	SPTBN1	S8	1.24693	TSsISGPLSPAYTGQVPYNYNQLEGR	1.18859	TSsISGPLSPAYTGQVPYNYNQLEGR
Treacle protein	TCOF	Q13428	TCOF1	S1228	1.40007	LDSsPSVSSTLAAK	NaN	LDSsPSVSSTLAAK
Connector enhancer of kinase suppressor of ras 2	CNKR2	Q8WXI2	CNKSR2	S390	nd		1.69724	GSEsPNSFLDQEYR
Striatin-4	STRN4	Q9NRL3	STRN4	S276	nd		3.19534	LGGSVLGQIPFLQNCEDEDsDEDDELDSVQHK
Isoform 2 of Synaptopodin	SYNPO	Q8N3V7-2	SYNPO	S784	nd		0.60373	SAGAENPRPFsPPR
182 kDa tankyrase-1-binding protein	TB182	Q9C0C2	TNKS1BP1	S228	nd		2.90282	GWSQEGPVKsPAECR
Zinc finger and BTB domain-containing protein 7A	ZBT7A	O95365	ZBTB7A	S549	0.729152	HFKDEDEDEDVAsPDGLGR	nd
Insulin receptor substrate 1	IRS1	P35568	IRS1	T1103	nd		NaN	RHSSEtFSSTPSATR
CTP synthase 1	PYRG1	P17812	CTPS1	S575	nd		NaN	SGSSsPDSEITELK
TRAF-type zinc finger domain-containing protein 1	TRAD1	O14545	TRAFD1	S327	NaN	ALPSLNTGSSsPR	1.46218	ALPSLNTGSSsPR
Sodium bicarbonate cotransporter 3	S4A7	Q9Y6M7	SLC4A7	S242	nd		1.95993	KHsDPHLLER; HsDPHLLER
Coatomer subunit beta'	COPB2	P35606	COPB2	T861	1.22339	STAQQELDGKPASPtPVIVASHTANK; STAQQELDGKPASPtPVIVASHTANKEEK	nd
Protein flightless-1 homolog	FLII	Q13045	FLII	S856	1.3414	NAEAVLQsPGLSGK	NaN	NAEAVLQsPGLSGK
Monocarboxylate transporter 1	MOT1	P53985	SLC16A1	S461	nd		2.30661	KEsKEEETSIDVAGKPNEVTK
FK506-binding protein 15	FKB15	Q5T1M5	FKBP15	S962	0.995085	RPSQEQSAsASSGQPQAPLNR	nd
Isoform 6 of Mitogen-activated protein kinase kinase kinase kinase 4	M4K4	O95819-6	MAP4K4	S1251	0.393598	VFFAsVR	0.392388	VFFAsVR
Methylosome subunit pICln	ICLN	P54105	CLNS1A	S102	1.00606	FEEESKEPVADEEEEDsDDDVEPITEFR	1.60567	FEEESKEPVADEEEEDsDDDVEPITEFR; EPVADEEEEDsDDDVEPITEFR
U1 small nuclear ribonucleoprotein 70 kDa	RU17	P08621	SNRNP70	S226	1.51949	YDERPGPsPLPHR	1.21247	YDERPGPsPLPHR
Serine/threonine-protein kinase OSR1	OXSR1	O95747	OXSR1	S339	1.02398	TEDGGWEWsDDEFDEESEEGK	0.934608	TEDGGWEWsDDEFDEESEEGK
Isoform 6 of Mitogen-activated protein kinase kinase kinase kinase 4	M4K4	O95819-6	MAP4K4	S886	nd		0.638777	sSSSFTPFIDPR
Protein TANC2	TANC2	Q9HCD6	TANC2	S1517	nd		NaN	FsPPPVGGQGK
RNA-binding motif, single-stranded-interacting protein 2	RBMS2	Q15434	RBMS2	S106	nd		1.08477	GYGFVDFDsPSAAQK
CTTNBP2 N-terminal-like protein	CT2NL	Q9P2B4	CTTNBP2NL	S444	nd		NaN	LLGSSASsPGYQSSYQVGINQR
Leucine zipper protein 1	LUZP1	Q86V48	LUZP1	S659	0.509738	EKPDsDDDLDIASLVTAK	0.767756	EKPDsDDDLDIASLVTAK
LIM domain only protein 7	LMO7	Q8WWI1	LMO7	T1048	1.0955	ISINQtPGK	1.31093	ISINQtPGK
Isoform B of Ras GTPase-activating protein-binding protein 2	G3BP2	Q9UN86-2	G3BP2	T227	0.79332	STtPPPAEPVSLPQEPPKPR	1.20134	STtPPPAEPVSLPQEPPKPR
Cytospin-A	CYTSA	Q69YQ0	SPECC1L	S385	0.529207	KGSsGNASEVSVACLTER	0.521165	KGSsGNASEVSVACLTER
A-kinase anchor protein 2	AKAP2	Q9Y2D5	AKAP2	S720	nd		NaN	TLsMIEEEIR
Serine/arginine repetitive matrix protein 2	SRRM2	Q9UQ35	SRRM2	S1329	NaN	ENSFGsPLEFR	NaN	ENSFGsPLEFR
Protein TANC2	TANC2	Q9HCD6	TANC2	S1458	nd		1.20831	DSAYISSsPLGSHQVFDFR
Importin subunit alpha-4	IMA4	O00505	KPNA3	S60	0.774497	NVPQEESLEDsDVDADFK	2.22147	NVPQEESLEDsDVDADFK
Insulin-like growth factor 2 mRNA-binding protein 2	IF2B2	Q9Y6M1	IGF2BP2	S164	0.915486	ISYIPDEEVSSPsPPQR	1.02385	ISYIPDEEVSSPsPPQR
Neuroblast differentiation-associated protein AHNAK	AHNK	Q09666	AHNAK	S177	1.07259	DIDISsPEFK	1.16301	DIDISsPEFK
Actin-binding LIM protein 1	ABLM1	O14639	ABLIM1	S431	nd		NaN	TLsPTPSAEGYQDVR
Apoptosis-stimulating of p53 protein 2	ASPP2	Q13625	TP53BP2	S698	NaN	IPRPLsPTK	0.719693	IPRPLsPTK
Supervillin	SVIL	O95425	SVIL	S707	nd		NaN	sFDEQNVPK
Tyrosine-protein kinase Lyn	LYN	P07948	LYN	S13	NaN	GKDSLsDDGVDLK	0.964054	GKDSLsDDGVDLK
Vimentin	VIME	P08670	VIM	S42	4.12125	TYSLGsALRPSTSR	2.93645	TYSLGsALRPSTSR
Scaffold attachment factor B1	SAFB1	Q15424	SAFB	S604	NaN	SVVsFDK	NaN	SVVsFDK; SVVsFDKVK
Bifunctional glutamate/proline--tRNA ligase	SYEP	P07814	EPRS	S886	nd		1.42858	EYIPGQPPLSQSSDSsPTR
Neuroblast differentiation-associated protein AHNAK	AHNK	Q09666	AHNAK	S216	1.07917	LPSGSGAAsPTGSAVDIR	1.13966	LPSGSGAAsPTGSAVDIR
Nuclease-sensitive element-binding protein 1	YBOX1	P67809	YBX1	S167	0.880046	NYQQNYQNSEsGEKNEGSESAPEGQAQQR	0.990442	NYQQNYQNSEsGEKNEGSESAPEGQAQQR
tRNA 2'-phosphotransferase 1	TRPT1	Q86TN4	TRPT1	S240	1.18662	KPLSLAGDEETECQSsPK	1.21755	KPLSLAGDEETECQSsPK
Thyroid hormone receptor-associated protein 3	TR150	Q9Y2W1	THRAP3	S939	NaN	FSGEEGEIEDDEsGTENREEKDNIQPTTE	nd
Src substrate cortactin	SRC8	Q14247	CTTN	S417	1.4715	LPsSPVYEDAASFK	nd
Prostaglandin E synthase 3	TEBP	Q15185	PTGES3	S113	nd		1.65744	DWEDDsDEDMSNFDR
SH3 domain-containing kinase-binding protein 1	SH3K1	Q96B97	SH3KBP1	S230	nd		NaN	sIEVENDFLPVEK
RNA-binding protein 10	RBM10	P98175	RBM10	S61	nd		NaN	HDYDDSsEEQSAEDSYEASPGSETQR
Cyclin-dependent kinase 3	CDK3	Q00526	CDK3	T14	1.34965	IGEGtYGVVYK	1.19697	IGEGtYGVVYK
Ankyrin repeat and SAM domain-containing protein 3	ANKS3	Q6ZW76	ANKS3	S320	nd		NaN	DVTsPINER
Sodium-driven chloride bicarbonate exchanger	S4A10	Q6U841	SLC4A10	S238	nd		NaN	sFADIGK
GRB10-interacting GYF protein 2	GGYF2	Q6Y7W6	GIGYF2	T373	0.821621	VGVEASEETPQtSSSSARPGTPSDHQSQEASQFER	nd
Ribosomal L1 domain-containing protein 1	RL1D1	O76021	RSL1D1	S361	0.855277	ATNEsEDEIPQLVPIGK	1.37177	ATNEsEDEIPQLVPIGK
Protein SDA1 homolog	SDA1	Q9NVU7	SDAD1	S585	nd		NaN	YIEIDsDEEPR
Pleckstrin homology domain-containing family G member 3	PKHG3	A1L390	PLEKHG3	S76	nd		NaN	GPLsPFNSR
RNA-binding protein 25	RBM25	P49756	RBM25	S677	0.794395	LGASNsPGQPNSVK	1.19121	LGASNsPGQPNSVK
Neuroblast differentiation-associated protein AHNAK	AHNK	Q09666	AHNAK	S5749	0.985045	AsLGSLEGEAEAEASSPK	nd
Neuroblast differentiation-associated protein AHNAK	AHNK	Q09666	AHNAK	S115	4.77356	EVFSSCSSEVVLsGDDEEYQR	nd
BUD13 homolog	BUD13	Q9BRD0	BUD13	S163	nd		NaN	HDTPDPsPLR
Junctional protein associated with coronary artery disease	JCAD	Q9P266	JCAD	S757	NaN	SLsPSSNSAFSR	NaN	SLsPSSNSAFSR
Zinc finger protein 185	ZN185	O15231	ZNF185	S468; S469	nd		1.80329	RESCGssVLTDFEGK
Protein PML	PML	P29590	PML	S518; S527	nd		1.37408	AVsPPHLDGPPsPR
Phosphorylated adapter RNA export protein	PHAX	Q9H814	PHAX	T353	nd		2.23934	EtFASDTNEALASLDESQEGHAEAK
182 kDa tankyrase-1-binding protein	TB182	Q9C0C2	TNKS1BP1	S836	2.54619	sQEADVQDWEFR	3.50809	sQEADVQDWEFR
Isoform Short of Tight junction protein ZO-1	ZO1	Q07157-2	TJP1	S912	1.01341	IDsPGFKPASQQVYR	1.12933	IDsPGFKPASQQVYR
182 kDa tankyrase-1-binding protein	TB182	Q9C0C2	TNKS1BP1	S672	nd		1.99766	TEAQDLCRAsPEPPGPESSSR
Centrosomal protein of 170 kDa	CE170	Q5SW79	CEP170	S1522; S1529	1.18963	SsPVNNHHsPGQTPTLGQPEAR	1.23513	SsPVNNHHsPGQTPTLGQPEAR
Spectrin beta chain, non-erythrocytic 1	SPTB2	Q01082	SPTBN1	S2340	nd		1.20462	AQTLPTSVVTITSEsSPGK
Ankyrin repeat and IBR domain-containing protein 1	AKIB1	Q9P2G1	ANKIB1	S737	0.466433	GVAPADsPEAPR	1.42014	GVAPADsPEAPR
Microtubule-associated protein 1B	MAP1B	P46821	MAP1B	S1785; T1788	nd		0.985878	SDIsPLtPR
EF-hand domain-containing protein D2	EFHD2	Q96C19	EFHD2	S74	NaN	ADLNQGIGEPQsPSR	1.13199	ADLNQGIGEPQsPSR; RADLNQGIGEPQsPSR
Myosin light chain kinase, smooth muscle	MYLK	Q15746	MYLK	S1779	1.54474	SSTGSPTsPLNAEK	1.75406	KSSTGSPTsPLNAEK; SSTGSPTsPLNAEK
Serine/arginine repetitive matrix protein 2	SRRM2	Q9UQ35	SRRM2	T1043	0.85087	SStPPGESYFGVSSLQLK	1.03826	SStPPGESYFGVSSLQLK
RNA binding motif protein, X-linked-like-1	RMXL1	Q96E39	RBMXL1	S208	nd		NaN	DVYLsPR
Lamin-B1	LMNB1	P20700	LMNB1	S391; S393	nd		1.08126	LKLsPsPSSR
Cyclin-dependent kinase 11A	CD11A	Q9UQ88	CDK11A	S740	nd		1.25966	GTsPRPPEGGLGYSQLGDDDLK
Histone H1.5	H15	P16401	HIST1H1B	S18	0.518818	SETAPAETATPAPVEKsPAK	0.724114	SETAPAETATPAPVEKsPAK; SETAPAETATPAPVEKsPAKK
CTTNBP2 N-terminal-like protein	CT2NL	Q9P2B4	CTTNBP2NL	S285	3.64414	DLEASHQHSsPNEQLK	nd
TP53-binding protein 1	TP53B	Q12888	TP53BP1	S380	nd		1.26434	STPFIVPSsPTEQEGR
Rho GTPase-activating protein 29	RHG29	Q52LW3	ARHGAP29	S499	1.00247	HLNSSQPSGFGPANsLEDVVR	1.26575	HLNSSQPSGFGPANsLEDVVR
Myelin expression factor 2	MYEF2	Q9P2K5	MYEF2	S17	0.440019	AEVPGATGGDsPHLQPAEPPGEPR	0.994186	AEVPGATGGDsPHLQPAEPPGEPR
DnaJ homolog subfamily C member 5	DNJC5	Q9H3Z4	DNAJC5	S12	nd		1.00511	SLSTsGESLYHVLGLDK
182 kDa tankyrase-1-binding protein	TB182	Q9C0C2	TNKS1BP1	S1024	1.31798	GsGGLFSPSTAHVPDGALGQR	1.40225	GsGGLFSPSTAHVPDGALGQR
Nucleolar protein 4-like	NOL4L	Q96MY1	NOL4L	T127	nd		1.85435	TtPESPPYSSGSYDSIK
Cyclin-Y-like protein 1	CCYL1	Q8N7R7	CCNYL1	S112	nd		1.69931	SNHLNHVsPGQLTK
Catenin alpha-2	CTNA2	P26232	CTNNA2	S654	1.34409	SRTsVQTEDDQLIAGQSAR	1.95022	SRTsVQTEDDQLIAGQSAR
Niban-like protein 1	NIBL1	Q96TA1	FAM129B	S692; S696	nd		1.53514	AAPEASsPPAsPLQHLLPGK
Aladin	AAAS	Q9NRG9	AAAS	S495	nd		1.10132	FsPVLGR
14-3-3 protein theta	1433T	P27348	YWHAQ	S232	nd		NaN	DNLTLWTSDsAGEECDAAEGAEN
Serine/arginine repetitive matrix protein 2	SRRM2	Q9UQ35	SRRM2	S876	0.889949	SCFESsPDPELK	NaN	SCFESsPDPELK
Zinc finger protein 185	ZN185	O15231	ZNF185	S155	NaN	RSSTsGDTEEEEEEEVVPFSSDEQKR	1.03792	RSSTsGDTEEEEEEEVVPFSSDEQKR; SSTsGDTEEEEEEEVVPFSSDEQKR
Tight junction protein ZO-1	ZO1	Q07157	TJP1	S617	1.6237	sREDLSAQPVQTK	NaN	sREDLSAQPVQTK
LIM domain only protein 7	LMO7	Q8WWI1	LMO7	T979	nd		NaN	EVAAtEEDVTRLPSPTSPFSSLSQDQAATSK
Synaptojanin-1	SYNJ1	O43426	SYNJ1	S1565	nd		NaN	AsPTLDFTER
Elongation factor 1-delta	EF1D	P29692	EEF1D	S162	NaN	KPATPAEDDEDDDIDLFGsDNEEEDKEAAQLR	1.16907	KPATPAEDDEDDDIDLFGsDNEEEDKEAAQLR
BMP-2-inducible protein kinase	BMP2K	Q9NSY1	BMP2K	S1031; S1032	1.73955	RDSQssNEFLTISDSK	1.41079	RDSQssNEFLTISDSK
Nuclease-sensitive element-binding protein 1	YBOX1	P67809	YBX1	S174	0.890244	NYQQNYQNSESGEKNEGsESAPEGQAQQR	0.983305	NYQQNYQNSESGEKNEGsESAPEGQAQQR
Serine/arginine-rich splicing factor 7	SRSF7	Q16629	SRSF7	S192	NaN	YFQsPSR	NaN	YFQsPSR
Microtubule-associated protein 1B	MAP1B	P46821	MAP1B	S937	nd		NaN	QGVDDIEKFEDEGAGFEESsETGDYEEK
Isoform 6 of Mitogen-activated protein kinase kinase kinase kinase 4	M4K4	O95819-6	MAP4K4	S1029	nd		1.0607	VYYLsWLR
Transmembrane protein 230	TM230	Q96A57	TMEM230	T25	nd		2.90482	LSStDDGYIDLQFK
Catenin delta-1	CTND1	O60716	CTNND1	S268	NaN	VGGsSVDLHR	nd
DNA-directed RNA polymerase I subunit RPA34	RPA34	O15446	CD3EAP	S285	0.871286	QEQINTEPLEDTVLsPTK	nd
Surfeit locus protein 6	SURF6	O75683	SURF6	S138	1.05251	ELsPAALEK	1.51568	ELsPAALEK
cAMP-dependent protein kinase type I-alpha regulatory subunit	KAP0	P10644	PRKAR1A	S77; S83	nd		2.9972	TDsREDEIsPPPPNPVVK
Signal-induced proliferation-associated 1-like protein 3	SI1L3	O60292	SIPA1L3	S172	0.829922	SSsEITLSECDAEDAGEPR	0.773765	SSsEITLSECDAEDAGEPR
Protein phosphatase 1 regulatory subunit 12A	MYPT1	O14974	PPP1R12A	S871	1.19914	STGVSFWTQDSDENEQEQQsDTEEGSNKK	1.53854	STGVSFWTQDSDENEQEQQsDTEEGSNKK; STGVSFWTQDSDENEQEQQsDTEEGSNK
Serine/arginine-rich splicing factor 1	SRSF1	Q07955	SRSF1	S199	nd		1.19983	VKVDGPRsPSYGR
Protein PRRC2C	PRC2C	Q9Y520	PRRC2C	S878	nd		0.755563	sVEDVRPHHTDANNQSACFEAPDQK
7SK snRNA methylphosphate capping enzyme	MEPCE	Q7L2J0	MEPCE	S69	nd		1.24	EsPGAAATSSSGPQAQQHR
Tight junction protein ZO-1	ZO1	Q07157	TJP1	S277; S280	nd		1.1753	ATLLNVPDLSDsIHsANASER
RUN and SH3 domain-containing protein 1	RUSC1	Q9BVN2	RUSC1	S742; T745	nd		NaN	VYAsGGtEGFPLSR
Isoform 6 of Mitogen-activated protein kinase kinase kinase kinase 4	M4K4	O95819-6	MAP4K4	S651	0.576616	LVPRPGSGSSsGSSNSGSQPGSHPGSQSGSGER	0.520132	LVPRPGSGSSsGSSNSGSQPGSHPGSQSGSGER
Catenin alpha-2	CTNA2	P26232	CTNNA2	S651; S654	1.81391	sRTsVQTEDDQLIAGQSAR	nd
Nucleolar and coiled-body phosphoprotein 1	NOLC1	Q14978	NOLC1	T188	nd		NaN	ItPVTVK
Histone H1.4	H14	P10412	HIST1H1E	S36	nd		NaN	KAsGPPVSELITK
Cytospin-B	CYTSB	Q5M775	SPECC1	S134	0.658649	SVSsPTSSNTPTPTK	0.830837	SVSsPTSSNTPTPTK
Actin-binding LIM protein 3	ABLM3	O94929	ABLIM3	S504	NaN	RFSsGGEEDDFDR	NaN	RFSsGGEEDDFDR
LIM and calponin homology domains-containing protein 1	LIMC1	Q9UPQ0	LIMCH1	T215; S217	0.315581	SRQtPsPDVVLR	0.589489	SRQtPsPDVVLR
AF4/FMR2 family member 4	AFF4	Q9UHB7	AFF4	S180	0.875806	SSsPGKPQAVSSLNSSHSR	1.15699	SSsPGKPQAVSSLNSSHSR
Paxillin	PAXI	P49023	PXN	S85	0.936154	FIHQQPQSSsPVYGSSAK	0.917684	FIHQQPQSSsPVYGSSAK
Glycogen synthase kinase-3 beta	GSK3B	P49841	GSK3B	S215	1.1949	GEPNVsYICSR	1.17685	GEPNVsYICSR
Epidermal growth factor receptor substrate 15-like 1	EP15R	Q9UBC2	EPS15L1	S255	1.37441	STPSHGSVSSLNSTGSLsPK	0.943917	STPSHGSVSSLNSTGSLsPK
Obscurin	OBSCN	Q5VST9	OBSCN	T473	nd		NaN	VAISAEGtR
LIM and calponin homology domains-containing protein 1	LIMC1	Q9UPQ0	LIMCH1	S204	nd		1.05115	DDSFDsLDSFGSR
Filamin-A	FLNA	P21333	FLNA	S968	1.73152	SPFSVAVSPsLDLSK	1.97175	SPFSVAVSPsLDLSK
182 kDa tankyrase-1-binding protein	TB182	Q9C0C2	TNKS1BP1	T715	1.8921	DTQSPStCSEGLLGWSQK	nd
Pleckstrin homology domain-containing family A member 5	PKHA5	Q9HAU0	PLEKHA5	T857	nd		1.50186	AKSPtPESSTIASYVTLR
Synaptosomal-associated protein 23	SNP23	O00161	SNAP23	S20	nd		1.05408	AHQITDEsLESTR
Bcl-2-like protein 12	B2L12	Q9HB09	BCL2L12	S242	nd		NaN	LsSDSFAR
Heat shock protein beta-1	HSPB1	P04792	HSPB1	S15	NaN	GPsWDPFR	nd
Leucine-rich repeat flightless-interacting protein 2	LRRF2	Q9Y608	LRRFIP2	S309	0.955997	QYAENYTRPSsR	0.968112	QYAENYTRPSsR
Lamin-B2	LMNB2	Q03252	LMNB2	S37	nd		0.992815	AGGPATPLsPTR
Isoform 6 of Mitogen-activated protein kinase kinase kinase kinase 4	M4K4	O95819-6	MAP4K4	S854; T857	nd		NaN	IHLLPDLLQQSHSSSTSSTSSSPSSsQPtPTMSPQTPQDK
Protein PRRC2B	PRC2B	Q5JSZ5	PRRC2B	S226	NaN	HIISATSLSTsPTELGSR	nd
Methylosome protein 50	MEP50	Q9BQA1	WDR77	T5	1.09896	KEtPPPLVPPAAR; EtPPPLVPPAAR	1.26463	KEtPPPLVPPAAR; EtPPPLVPPAAR
6-phosphofructo-2-kinase/fructose-2,6-bisphosphatase 3	F263	Q16875	PFKFB3	T463	0.984603	RNSVtPLASPEPTK	1.11271	RNSVtPLASPEPTK
Zinc finger protein 185	ZN185	O15231	ZNF185	T447	0.864194	GGQGDPAVPAQQPADPStPER	1.26157	GGQGDPAVPAQQPADPStPER
RNA-binding protein 10	RBM10	P98175	RBM10	S723	0.838873	LASDDRPsPPR	1.34382	LASDDRPsPPR
Drebrin	DREB	Q16643	DBN1	S141; S142	nd		NaN	LssPVLHR
Stathmin	STMN1	P16949	STMN1	S16	nd		0.539899	RAsGQAFELILSPR
Cadherin-6	CADH6	P55285	CDH6	S786	NaN	LADMYGGVDsDKDS	nd
Mitogen-activated protein kinase kinase kinase 7	M3K7	O43318	MAP3K7	S439	1.99084	sIQDLTVTGTEPGQVSSR	2.16449	sIQDLTVTGTEPGQVSSR
Unconventional myosin-XVIIIa	MY18A	Q92614	MYO18A	S2043	1.007	YSHSYLSDsDTEAK	1.65517	YSHSYLSDsDTEAK
Poly(A)-specific ribonuclease PARN	PARN	O95453	PARN	S619	nd		NaN	ELsPAGSISK
TRAF2 and NCK-interacting protein kinase	TNIK	Q9UKE5	TNIK	S766	nd		NaN	sEGSPVLPHEPAK
BMP-2-inducible protein kinase	BMP2K	Q9NSY1	BMP2K	S1032	1.56144	RDSQSsNEFLTISDSK	1.19462	RDSQSsNEFLTISDSK
Sarcolemmal membrane-associated protein	SLMAP	Q14BN4	SLMAP	S452	1.54179	ESDFSDTLsPSK; ESDFSDTLsPSKEK	2.1776	ESDFSDTLsPSK; ESDFSDTLsPSKEK
Centrosomal protein of 170 kDa	CE170	Q5SW79	CEP170	S1521; S1522	nd		1.23513	ssPVNNHHSPGQTPTLGQPEAR
Cingulin-like protein 1	CGNL1	Q0VF96	CGNL1	S283	nd		3.50863	RQDsAGPVLDGAR
Drebrin	DREB	Q16643	DBN1	S345	nd		NaN	SPSDSSTAsTPVAEQIER
Raftlin	RFTN1	Q14699	RFTN1	S199	nd		1.60915	GDHAsLENEKPGTGDVCSAPAGR
Telomere-associated protein RIF1	RIF1	Q5UIP0	RIF1	S1688	nd		3.55347	RDsFDNCSLGESSK
182 kDa tankyrase-1-binding protein	TB182	Q9C0C2	TNKS1BP1	S601	1.31886	YESQEPLAGQEsPLPLATR	1.98064	YESQEPLAGQEsPLPLATR
Gamma-adducin	ADDG	Q9UEY8	ADD3	T651	NaN	LStSTTIENIEITIK	NaN	LStSTTIENIEITIK
Unconventional myosin-IXb	MYO9B	Q13459	MYO9B	S1354	nd		0.722784	RTsFSTSDVSK
Microtubule-associated protein 1B	MAP1B	P46821	MAP1B	S1917	1.98955	SPsDSGYSYETIGK	1.72722	TTKSPsDSGYSYETIGK
Ubiquitin-associated protein 2-like	UBP2L	Q14157	UBAP2L	S608	NaN	YPSSISsSPQK	1.16718	YPSSISsSPQK
ADP-ribosylation factor GTPase-activating protein 1	ARFG1	Q8N6T3	ARFGAP1	S361	nd		0.491303	RSsDSWEVWGSASTNR
Transcription factor AP-1	JUN	P05412	JUN	S63	nd		2.46742	NSDLLTsPDVGLLK
Ribosomal L1 domain-containing protein 1	RL1D1	O76021	RSL1D1	T358	0.860307	AtNESEDEIPQLVPIGK	1.38734	AtNESEDEIPQLVPIGK
General transcription factor 3C polypeptide 3	TF3C3	Q9Y5Q9	GTF3C3	S51	0.63838	GKLSAEENPDDsEVPSSSGINSTK	nd
Guanine nucleotide-binding protein G(I)/G(S)/G(O) subunit gamma-12	GBG12	Q9UBI6	GNG12	T8	NaN	TAStNNIAQAR	nd
Nucleolin	NUCL	P19338	NCL	S563	nd		1.4518	AIRLELQGPRGsPNAR
Protein virilizer homolog	VIR	Q69YN4	VIRMA	S1579	NaN	SFLSEPSsPGR	NaN	SFLSEPSsPGR
Serine/arginine-rich splicing factor 1	SRSF1	Q07955	SRSF1	S199; S201	1.05731	VKVDGPRsPsYGR	1.27843	VDGPRsPsYGR; VKVDGPRsPsYGR
Nuclear fragile X mental retardation-interacting protein 2	NUFP2	Q7Z417	NUFIP2	S629	0.842396	DYEIESQNPLAsPTNTLLGSAK	1.38429	DYEIESQNPLAsPTNTLLGSAK
182 kDa tankyrase-1-binding protein	TB182	Q9C0C2	TNKS1BP1	S1138	1.47437	VSGAGFsPSSK	1.62434	VSGAGFsPSSK
Kinesin light chain 1	KLC1	Q07866	KLC1	S524	nd		0.601279	SREsLNVDVVK
GRB10-interacting GYF protein 2	GGYF2	Q6Y7W6	GIGYF2	S26	0.816105	ALSSGGSITsPPLSPALPK	0.826103	ALSSGGSITsPPLSPALPK
Drebrin	DREB	Q16643	DBN1	S142	1.23398	LSsPVLHR	1.3837	LSsPVLHRLR; LSsPVLHR
Nuclease-sensitive element-binding protein 1	YBOX1	P67809	YBX1	S165; S167	nd		1.0829	NYQQNYQNsEsGEKNEGSESAPEGQAQQR
Drebrin	DREB	Q16643	DBN1	T591	1.3164	EGtQASEGYFSQSQEEEFAQSEELCAK	nd
Drebrin	DREB	Q16643	DBN1	S141	nd		1.37496	LsSPVLHR
Splicing factor 1	SF01	Q15637	SF1	S80; S82	nd		NaN	TGDLGIPPNPEDRsPsPEPIYNSEGK
Leucine-rich repeat flightless-interacting protein 1	LRRF1	Q32MZ4	LRRFIP1	S733	NaN	CTLPEHEsPSQDISDACEAESTER	nd
E3 ubiquitin-protein ligase UBR4	UBR4	Q5T4S7	UBR4	S2719	nd		1.1992	HVTLPSsPR
Microtubule-associated protein 4	MAP4	P27816	MAP4	T521	1.31287	DVtPPPETEVVLIK	1.34802	DVtPPPETEVVLIK
A-kinase anchor protein 2	AKAP2	Q9Y2D5	AKAP2	S393	0.788959	sPGALETPSAAGSQGNTASQGK; GQKsPGALETPSAAGSQGNTASQGK	1.9188	sPGALETPSAAGSQGNTASQGK
Isoform 6 of Mitogen-activated protein kinase kinase kinase kinase 4	M4K4	O95819-6	MAP4K4	S888; S889	0.404022	SSssFTPFIDPR	nd
Microtubule-associated protein 1B	MAP1B	P46821	MAP1B	S1819	nd		1.47598	TATCHSSSsPPIDAASAEPYGFR
ARF GTPase-activating protein GIT1	GIT1	Q9Y2X7	GIT1	S362	nd		NaN	SLSsPTDNLELSLR
Microtubule-associated protein 1B	MAP1B	P46821	MAP1B	S1818	nd		1.47598	TATCHSSsSPPIDAASAEPYGFR
Ras GTPase-activating-like protein IQGAP1	IQGA1	P46940	IQGAP1	S330	nd		0.687665	ALQsPALGLR
Isoform 2 of Deoxyuridine 5'-triphosphate nucleotidohydrolase, mitochondrial	DUT	P33316-2	DUT	S11	nd		2.53722	PCSEETPAIsPSK
Securin-2	PTTG2	Q9NZH5	PTTG2	S165	nd		1.85604	LFQLGPPsPVK
Prelamin-A/C	LMNA	P02545	LMNA	S392	nd		1.31819	LRLSPsPTSQR
HAUS augmin-like complex subunit 7	HAUS7	Q99871	HAUS7	T84	nd		NaN	LEILEWMCtR
Synaptosomal-associated protein 23	SNP23	O00161	SNAP23	S110	0.763527	TTWGDGGENsPCNVVSK	0.925069	TTWGDGGENsPCNVVSK
Kinesin-like protein KIF11	KIF11	P52732	KIF11	T926	1.06264	LDIPTGTtPQR; LDIPTGTtPQRK	1.26885	LDIPTGTtPQR; LDIPTGTtPQRK
Neuroblast differentiation-associated protein AHNAK	AHNK	Q09666	AHNAK	S1286	NaN	ADIDVsGPK	nd
Nuclear fragile X mental retardation-interacting protein 2	NUFP2	Q7Z417	NUFIP2	S572	NaN	TsPQVLGSILK	1.01024	TsPQVLGSILK
Microtubule-associated protein 1B	MAP1B	P46821	MAP1B	S1330	nd		2.29858	TLEVVSPSQSVTGsAGHTPYYQSPTDEK
LIM and calponin homology domains-containing protein 1	LIMC1	Q9UPQ0	LIMCH1	T724	1.08984	SPEPEAtLTFPFLDK	1.5354	SPEPEAtLTFPFLDK
Serine/arginine repetitive matrix protein 2	SRRM2	Q9UQ35	SRRM2	S2449	0.790972	sPVPSAFSDQSR	1.00307	sPVPSAFSDQSR
Eukaryotic translation initiation factor 3 subunit C-like protein	EIFCL	B5ME19	EIF3CL	S39	1.00957	QPLLLsEDEEDTKR	1.00074	QPLLLsEDEEDTKR
Filamin-A	FLNA	P21333	FLNA	S1630	2.4063	YGGDEIPFsPYR	2.23198	YGGDEIPFsPYR
SWI/SNF complex subunit SMARCC2	SMRC2	Q8TAQ2	SMARCC2	S283	0.643942	TLTDEVNsPDSDRR	0.775172	TLTDEVNsPDSDRR
Dedicator of cytokinesis protein 4	DOCK4	Q8N1I0	DOCK4	S1620	nd		NaN	NSAPASVsPDGTR
Striatin-interacting protein 1	STRP1	Q5VSL9	STRIP1	S335	2.65238	AAsPPASASDLIEQQQK	3.4098	AAsPPASASDLIEQQQK; AAsPPASASDLIEQQQKR
RalBP1-associated Eps domain-containing protein 1	REPS1	Q96D71	REPS1	S482	2.26935	TGSDHTNPTsPLLVKPSDLLEENK	2.43633	TGSDHTNPTsPLLVKPSDLLEENK
Cyclin-dependent kinase 11B	CD11B	P21127	CDK11B	S283	nd		1.02517	DLLSDLQDIsDSER
LIM domain only protein 7	LMO7	Q8WWI1	LMO7	S960	0.832743	TPNNVVSTPAPsPDASQLASSLSSQK	1.06144	TPNNVVSTPAPsPDASQLASSLSSQK
RNA-binding protein 10	RBM10	P98175	RBM10	S73	1.14384	HDYDDSSEEQSAEDSYEAsPGSETQR	nd
Fatty acid synthase	FAS	P49327	FASN	T430	nd		NaN	tPEAVQK
60S acidic ribosomal protein P0	RLA0	P05388	RPLP0	S304; S307	1.07153	VEAKEEsEEsDEDMGFGLFD	1.14726	VEAKEEsEEsDEDMGFGLFD
Synaptopodin	SYNPO	Q8N3V7	SYNPO	S833	0.481722	AAsPAKPSSLDLVPNLPK	NaN	AAsPAKPSSLDLVPNLPK
Serine/arginine repetitive matrix protein 2	SRRM2	Q9UQ35	SRRM2	S1383	nd		1.05256	SSGHSsSELSPDAVEK
Zinc finger CCCH-type antiviral protein 1	ZCCHV	Q7Z2W4	ZC3HAV1	S284	0.900901	AsLEDAPVDDLTR	NaN	AsLEDAPVDDLTR
Protein kinase C and casein kinase substrate in neurons protein 3	PACN3	Q9UKS6	PACSIN3	T324	nd		2.55225	GGRSPDEVtLTSIVPTR
Neuroblast differentiation-associated protein AHNAK	AHNK	Q09666	AHNAK	S5752	0.970455	ASLGsLEGEAEAEASSPK	1.11809	ASLGsLEGEAEAEASSPK
Isoform 6 of Mitogen-activated protein kinase kinase kinase kinase 4	M4K4	O95819-6	MAP4K4	S876	0.371257	LTANETQsASSTLQK	0.38845	LTANETQsASSTLQK
Isoform 6 of Mitogen-activated protein kinase kinase kinase kinase 4	M4K4	O95819-6	MAP4K4	T319; S324	0.350848	DEtEYEYsGSEEEEEEVPEQEGEPSSIVNVPGESTLR	nd
Leucine-rich repeat flightless-interacting protein 2	LRRF2	Q9Y608	LRRFIP2	S312	nd		0.332351	NsASATTPLSGNSSR
Serine/arginine repetitive matrix protein 1	SRRM1	Q8IYB3	SRRM1	S695	nd		1.10009	APQTSsSPPPVR
Beta-2-syntrophin	SNTB2	Q13425	SNTB2	S110	0.924446	GPAGEAGAsPPVR	1.228	GPAGEAGAsPPVR; GPAGEAGAsPPVRR
Ephrin type-A receptor 2	EPHA2	P29317	EPHA2	S901	nd		1.1958	LPSTSGsEGVPFR
182 kDa tankyrase-1-binding protein	TB182	Q9C0C2	TNKS1BP1	S691	1.59944	WLDDLLAsPPPSGGGAR	2.40359	WLDDLLAsPPPSGGGAR
TRAF2 and NCK-interacting protein kinase	TNIK	Q9UKE5	TNIK	S769	nd		NaN	SEGsPVLPHEPAK
CTTNBP2 N-terminal-like protein	CT2NL	Q9P2B4	CTTNBP2NL	S592	NaN	KPGLTPsPSATTPLTK	NaN	KPGLTPsPSATTPLTK
Neuroblast differentiation-associated protein AHNAK	AHNK	Q09666	AHNAK	S5749; S5752	nd		1.08633	AsLGsLEGEAEAEASSPK
Src substrate cortactin	SRC8	Q14247	CTTN	T399	nd		2.00251	AKtQTPPVSPAPQPTEER
Protein PRRC2C	PRC2C	Q9Y520	PRRC2C	S2105	NaN	LPDLsPVENK	1.00718	LPDLsPVENK
Nuclear-interacting partner of ALK	NIPA	Q86WB0	ZC3HC1	S344	nd		1.18639	SQDATFSPGSEQAEKsPGPIVSR
Lamina-associated polypeptide 2, isoforms beta/gamma	LAP2B	P42167	TMPO	S184	nd		1.62651	QNGSNDSDRYsDNEEDSKIELK
Ankycorbin	RAI14	Q9P0K7	RAI14	S293	NaN	sITSTPLSGK	NaN	sITSTPLSGK
U7 snRNA-associated Sm-like protein LSm11	LSM11	P83369	LSM11	S15	1.22074	SAGAGsPARPPSPR	nd
Leucine-rich repeat-containing protein 47	LRC47	Q8N1G4	LRRC47	S518	NaN	EEGsLSDTEADAVSGQLPDPTTNPSAGK	0.969825	EEGsLSDTEADAVSGQLPDPTTNPSAGK
Eukaryotic translation initiation factor 4 gamma 1	IF4G1	Q04637	EIF4G1	S1231	0.808327	EAALPPVsPLK	0.930951	EAALPPVsPLK
Desmoglein-2	DSG2	Q14126	DSG2	S680	0.658548	VVPSFLPVDQGGsLVGR	0.630301	VVPSFLPVDQGGsLVGR
Isoform 8 of Sodium bicarbonate cotransporter 3	S4A7	Q9Y6M7-8	SLC4A7	S1220	nd		NaN	SNMsPDKPVSVK
Zinc finger protein 292	ZN292	O60281	ZNF292	T1017	0.986733	IGDLtPQNLER	NaN	IGDLtPQNLER
Thyroid hormone receptor-associated protein 3	TR150	Q9Y2W1	THRAP3	S253	nd		1.43466	SPALKsPLQSVVVR
MAP7 domain-containing protein 1	MA7D1	Q3KQU3	MAP7D1	S116	nd		0.744	RSSQPsPTAVPASDSPPTK
General transcription factor II-I	GTF2I	P78347	GTF2I	S823	0.709216	ESTSSKsPPRK	nd
Vimentin	VIME	P08670	VIM	S47	NaN	TYSLGSALRPsTSR	1.25553	TYSLGSALRPsTSR
Scaffold attachment factor B1	SAFB1	Q15424	SAFB	S344	nd		1.49165	TDCEPVGLEPAVEQSSAASELAEASSEELAEAPTEAPsPEAR
Band 4.1-like protein 2	E41L2	O43491	EPB41L2	S715	nd		1.71512	EIsPGSGPGEIR
Neuroblast differentiation-associated protein AHNAK	AHNK	Q09666	AHNAK	S5110	1.02743	AEAPLPsPK	1.13852	AEAPLPsPK
FERM, ARHGEF and pleckstrin domain-containing protein 1	FARP1	Q9Y4F1	FARP1	S427	nd		1.25051	VSAGEPGSHPsPAPR
Hepatoma-derived growth factor	HDGF	P51858	HDGF	S133	1.00007	GNAEGSsDEEGKLVIDEPAK	1.29044	GNAEGSsDEEGKLVIDEPAK
PDZ domain-containing protein GIPC1	GIPC1	O14908	GIPC1	S232	1.96388	SAGGRPGsGPQLGTGR	1.11393	SAGGRPGsGPQLGTGR
Heterogeneous nuclear ribonucleoprotein K	HNRPK	P61978	HNRNPK	S121	nd		NaN	IIPTLEEGLQLPSPTATsQLPLESDAVECLNYQHYK
Zinc finger and BTB domain-containing protein 16	ZBT16	Q05516	ZBTB16	T282	nd		NaN	VEERGKEGPGtPTR
Drebrin	DREB	Q16643	DBN1	S381	nd		NaN	ALDEVTSSQPPPLPPPPPPAQETQEPsPILDSEETR
Cation-independent mannose-6-phosphate receptor	MPRI	P11717	IGF2R	S2409	0.90564	ALSSLHGDDQDsEDEVLTIPEVK	NaN	ALSSLHGDDQDsEDEVLTIPEVK
Unconventional myosin-XVIIIa	MY18A	Q92614	MYO18A	S2041	1.00737	YSHSYLsDSDTEAK	1.65517	YSHSYLsDSDTEAK
Protein scribble homolog	SCRIB	Q14160	SCRIB	S504	0.892742	RSEACPCQPDSGsPLPAEEEK	1.36552	RSEACPCQPDSGsPLPAEEEK
FACT complex subunit SSRP1	SSRP1	Q08945	SSRP1	S444	NaN	EGMNPSYDEYADsDEDQHDAYLER	nd
Protein phosphatase Slingshot homolog 1	SSH1	Q8WYL5	SSH1	S897	nd		NaN	sPPPFFYR
Src substrate cortactin	SRC8	Q14247	CTTN	S405	1.36687	TQTPPVsPAPQPTEER	1.72926	TQTPPVsPAPQPTEER
RNA-binding protein 15	RBM15	Q96T37	RBM15	S294	NaN	SLsPGGAALGYR	1.03264	SLsPGGAALGYR
Signal-induced proliferation-associated 1-like protein 2	SI1L2	Q9P2F8	SIPA1L2	S1488	NaN	TLsDESICSNR	nd
Guanine nucleotide-binding protein G(I)/G(S)/G(O) subunit gamma-12	GBG12	Q9UBI6	GNG12	S7	0.916559	TAsTNNIAQAR	0.708156	TAsTNNIAQAR
Zinc finger Ran-binding domain-containing protein 2	ZRAB2	O95218	ZRANB2	S120	1.02139	ENVEYIEREEsDGEYDEFGR	0.963744	ENVEYIEREEsDGEYDEFGR
Tumor protein D54	TPD54	O43399	TPD52L2	S166	nd		NaN	NSATFKsFEDR
LIM domain only protein 7	LMO7	Q8WWI1	LMO7	S1423	1.50015	SRsTTELDDYSTNK	NaN	SRsTTELDDYSTNK
Catenin alpha-1	CTNA1	P35221	CTNNA1	S641	1.04368	TPEELDDsDFETEDFDVR	1.41727	TPEELDDsDFETEDFDVR
Protein LSM12 homolog	LSM12	Q3MHD2	LSM12	T75	0.776724	TEtPPPLASLNVSK	0.978355	TEtPPPLASLNVSK
Basigin	BASI	P35613	BSG	S362	1.28689	RKPEDVLDDDDAGsAPLK	2.17926	RKPEDVLDDDDAGsAPLK
60S acidic ribosomal protein P1	RLA1	P05386	RPLP1	S101	1.01388	KEEsEESDDDMGFGLFD	1.08098	KEEsEESDDDMGFGLFD
Catenin beta-1	CTNB1	P35222	CTNNB1	S675	1.25338	RLsVELTSSLFR	1.34663	RLsVELTSSLFR
Lamina-associated polypeptide 2, isoforms beta/gamma	LAP2B	P42167	TMPO	S177	0.829021	QNGsNDSDRYSDNEEDSKIELK	nd
Striatin-3	STRN3	Q13033	STRN3	S229	2.9879	NLEQILNGGEsPK	3.89864	NLEQILNGGEsPKQK; NLEQILNGGEsPK
Beta-2-syntrophin	SNTB2	Q13425	SNTB2	S393	1.00347	sPSLGSDLTFATR	1.05032	sPSLGSDLTFATR
Zinc finger CCCH-type antiviral protein 1	ZCCHV	Q7Z2W4	ZC3HAV1	S378	NaN	TVFsPTLPAAR	0.739479	TVFsPTLPAAR
Signal-induced proliferation-associated 1-like protein 1	SI1L1	O43166	SIPA1L1	S1549	NaN	LIDLEsPTPESQK	1.12452	LIDLEsPTPESQK
Merlin	MERL	P35240	NF2	S518	nd		NaN	RLsMEIEK
Heterogeneous nuclear ribonucleoprotein A1	ROA1	P09651	HNRNPA1	S365	0.725508	NQGGYGGSSSSSsYGSGR	nd
Guanine nucleotide-binding protein G(I)/G(S)/G(O) subunit gamma-12	GBG12	Q9UBI6	GNG12	S49	nd		NaN	sDPLLIGIPTSENPFK
Striatin-interacting protein 1	STRP1	Q5VSL9	STRIP1	S65	3.25427	KDSEGYSEsPDLEFEYADTDK	4.08875	KDSEGYSEsPDLEFEYADTDK
Hepatoma-derived growth factor	HDGF	P51858	HDGF	S165	0.975038	RAGDLLEDsPK; AGDLLEDsPKRPK	1.13028	RAGDLLEDsPKRPK; RAGDLLEDsPK; AGDLLEDsPKRPK
Transcription intermediary factor 1-beta	TIF1B	Q13263	TRIM28	S473	nd		1.76573	SRsGEGEVSGLMR
Striatin	STRN	O43815	STRN	S239	nd		3.68686	FLEsAAADFSDEDEDDDVDGR
Protein furry homolog-like	FRYL	O94915	FRYL	S2272	NaN	TYGGDTGsPEISFTK	1.09286	TYGGDTGsPEISFTK
Sciellin	SCEL	O95171	SCEL	S475	3.07183	SSEQGLDEHINVsPK	3.27927	SSEQGLDEHINVsPK
Periphilin-1	PPHLN	Q8NEY8	PPHLN1	S133	1.10385	DNTFFREsPVGR	1.30702	DNTFFREsPVGR
Ubiquitin-associated protein 2-like	UBP2L	Q14157	UBAP2L	S462	1.38155	STsAPQMSPGSSDNQSSSPQPAQQK	1.24187	STsAPQMSPGSSDNQSSSPQPAQQK
Isoform 2 of Zinc finger protein 185	ZN185	O15231-2	ZNF185	T64	1.16277	StGSPTQETQAPFIAK	nd
LIM domain only protein 7	LMO7	Q8WWI1	LMO7	T1424	1.57681	StTELDDYSTNK; SRStTELDDYSTNK	NaN	StTELDDYSTNK
Isoform 6 of Mitogen-activated protein kinase kinase kinase kinase 4	M4K4	O95819-6	MAP4K4	T943	nd		0.785055	GSVVNVNPTNtRPQSDTPEIR
Isoform 6 of Mitogen-activated protein kinase kinase kinase kinase 4	M4K4	O95819-6	MAP4K4	S9	0.451847	sLVDIDLSSLR	0.47594	sLVDIDLSSLR
Connector enhancer of kinase suppressor of ras 2	CNKR2	Q8WXI2	CNKSR2	S908	nd		NaN	LGDsLQDLYR
Pre-mRNA 3'-end-processing factor FIP1	FIP1	Q6UN15	FIP1L1	T494	0.933967	ERDHSPtPSVFNSDEER	NaN	ERDHSPtPSVFNSDEER
Heterogeneous nuclear ribonucleoprotein A3	ROA3	P51991	HNRNPA3	S358	0.875243	SSGsPYGGGYGSGGGSGGYGSR	1.03375	SSGsPYGGGYGSGGGSGGYGSR
LEM domain-containing protein 2	LEMD2	Q8NC56	LEMD2	S499	0.842906	WTKPSSFsDSER	1.49624	WTKPSSFsDSER
RalBP1-associated Eps domain-containing protein 1	REPS1	Q96D71	REPS1	S272	1.35809	RQsSSYDDPWK	0.910052	RQsSSYDDPWK
Serine/threonine-protein kinase RIO2	RIOK2	Q9BVS4	RIOK2	S337	nd		NaN	EGSEFSFsDGEVAEK
Spindlin interactor and repressor of chromatin-binding protein	SPNDC	Q9BUA3	SPINDOC	S55	0.651733	VTQQEKTPPPRPsPLEAGSDGCEEPK	nd
Prelamin-A/C	LMNA	P02545	LMNA	S390; S392	0.804572	LRLsPsPTSQR	1.04082	LRLsPsPTSQR
Condensin complex subunit 3	CND3	Q9BPX3	NCAPG	S32; T34; T37	NaN	LVVALsRtYRtMDDK	nd
CTTNBP2 N-terminal-like protein	CT2NL	Q9P2B4	CTTNBP2NL	S481	4.29931	FQSQADQDQQASGLQsPPSR	5.80302	FQSQADQDQQASGLQsPPSR
Serine/arginine repetitive matrix protein 2	SRRM2	Q9UQ35	SRRM2	T289; S297	nd		1.05921	THTtALAGRSPsPASGR
Tight junction protein ZO-1	ZO1	Q07157	TJP1	S297; S300	nd		1.02661	DDISEIQSLAsDHsGR
Spindlin interactor and repressor of chromatin-binding protein	SPNDC	Q9BUA3	SPINDOC	S308	0.577395	AEsPSPAPPPGLR	0.881009	AEsPSPAPPPGLR
Drebrin	DREB	Q16643	DBN1	S601	NaN	EGTQASEGYFSQsQEEEFAQSEELCAK	1.57561	EGTQASEGYFSQsQEEEFAQSEELCAK
Zinc finger CCCH-type antiviral protein 1	ZCCHV	Q7Z2W4	ZC3HAV1	S275	0.826195	SCTPsPDQISHR	0.614102	SCTPsPDQISHR
Bcl-2-associated transcription factor 1	BCLF1	Q9NYF8	BCLAF1	S287	nd		1.13268	YSPsQNSPIHHIPSR
Afadin	AFAD	P55196	AFDN	S1182	nd		0.940464	SSPNVANQPPsPGGK
Chromobox protein homolog 1	CBX1	P83916	CBX1	S89	0.479599	KADsDSEDKGEESKPK	nd
Unconventional myosin-XVIIIa	MY18A	Q92614	MYO18A	S2007	NaN	SSsPTSYWK	NaN	SSsPTSYWK
LIM domain only protein 7	LMO7	Q8WWI1	LMO7	S991	1.03594	LPSPTsPFSSLSQDQAATSK	1.32224	LPSPTsPFSSLSQDQAATSK
E3 ubiquitin-protein ligase TRIP12	TRIPC	Q14669	TRIP12	S312	nd		1.40484	SEsPPAELPSLR
E3 ubiquitin-protein ligase TRIP12	TRIPC	Q14669	TRIP12	S310	nd		NaN	sESPPAELPSLR
Microtubule-associated protein 1B	MAP1B	P46821	MAP1B	S1298; S1312	1.89632	VSAEAEVAPVsPEVTQEVVEEHCAsPEDK	nd
BTB/POZ domain-containing protein KCTD5	KCTD5	Q9NXV2	KCTD5	S29	1.45512	CsAGLGALAQRPGSVSK; RCsAGLGALAQRPGSVSK	0.766431	CsAGLGALAQRPGSVSK; RCsAGLGALAQRPGSVSK
Catenin beta-1	CTNB1	P35222	CTNNB1	T556	1.33999	RTSMGGtQQQFVEGVR	1.32209	TSMGGtQQQFVEGVR; RTSMGGtQQQFVEGVR
Leucine-rich repeat-containing protein 56	LRC56	Q8IYG6	LRRC56	S465	nd		0.725082	DSGSSsPR
Cytoplasmic dynein 1 light intermediate chain 1	DC1L1	Q9Y6G9	DYNC1LI1	S207	nd		0.798938	DFQEYVEPGEDFPAsPQR
Serine/arginine repetitive matrix protein 1	SRRM1	Q8IYB3	SRRM1	S715	nd		1.04526	QSPsPSTRPIR
Cation-independent mannose-6-phosphate receptor	MPRI	P11717	IGF2R	S2484	NaN	LVSFHDDsDEDLLHI	NaN	LVSFHDDsDEDLLHI
Isoform 6 of Mitogen-activated protein kinase kinase kinase kinase 4	M4K4	O95819-6	MAP4K4	S598; S600	0.712419	TTsRsPVLSR	0.506866	TTsRsPVLSR
Serine/threonine-protein kinase N2	PKN2	Q16513	PKN2	S582	NaN	AsSLGEIDESSELR	nd
Transformer-2 protein homolog beta	TRA2B	P62995	TRA2B	S264; S266	0.735883	RRsPsPYYSR	1.30807	RRsPsPYYSR; RsPsPYYSR
182 kDa tankyrase-1-binding protein	TB182	Q9C0C2	TNKS1BP1	S872	1.27984	DsLGTYSSR; RDsLGTYSSR	1.38385	DsLGTYSSR; RDsLGTYSSR
Spindlin interactor and repressor of chromatin-binding protein	SPNDC	Q9BUA3	SPINDOC	S152; S154	nd		1.29916	AEQPSPPNsDsGQDAHPDPDANPDAAR
Rho guanine nucleotide exchange factor 12	ARHGC	Q9NZN5	ARHGEF12	S637	nd		1.56688	HLSTPSSVsPEPQDSAK
Rho guanine nucleotide exchange factor 11	ARHGB	O15085	ARHGEF11	S1295	1.19036	TRNsGIWESPELDR	1.25693	TRNsGIWESPELDR
CTTNBP2 N-terminal-like protein	CT2NL	Q9P2B4	CTTNBP2NL	S557	NaN	VSsPLSPLSPGIK	NaN	VSsPLSPLSPGIK
Spectrin alpha chain, non-erythrocytic 1	SPTN1	Q13813	SPTAN1	S1323	NaN	CTELNQAWSsLGK	0.755607	CTELNQAWSsLGK
Microtubule-associated protein 1B	MAP1B	P46821	MAP1B	S1322	NaN	TLEVVsPSQSVTGSAGHTPYYQSPTDEK	nd
Catenin beta-1	CTNB1	P35222	CTNNB1	S191	NaN	sPQMVSAIVR	NaN	sPQMVSAIVR
LIM domain and actin-binding protein 1	LIMA1	Q9UHB6	LIMA1	S686	NaN	EGHSLEMENENLVENGADsDEDDNSFLK	nd
6-pyruvoyl tetrahydrobiopterin synthase	PTPS	Q03393	PTS	S19	0.59889	RIsFSASHR	0.615844	RIsFSASHR
Transformer-2 protein homolog alpha	TRA2A	Q13595	TRA2A	T88	0.548734	SYtPEYR	0.678416	SYtPEYR
Synapse-associated protein 1	SYAP1	Q96A49	SYAP1	T248	NaN	tPPVVIK	1.37014	tPPVVIK
Piezo-type mechanosensitive ion channel component 2	PIEZ2	Q9H5I5	PIEZO2	S1857	NaN	NRMAVsPDDSR	nd
Vesicle-trafficking protein SEC22b	SC22B	O75396	SEC22B	S137	1.14784	NLGsINTELQDVQR	1.81933	NLGsINTELQDVQR
Sodium/hydrogen exchanger 1	SL9A1	P19634	SLC9A1	S703	nd		NaN	IGsDPLAYEPK
U2 small nuclear ribonucleoprotein auxiliary factor 35 kDa subunit-related protein 2	U2AFM	Q15696	ZRSR2	S349	nd		NaN	DIYLsPDR
Rho guanine nucleotide exchange factor 12	ARHGC	Q9NZN5	ARHGEF12	S341	nd		1.72568	SETIQDTDTQSLVGsPSTR
Signal-induced proliferation-associated 1-like protein 1	SI1L1	O43166	SIPA1L1	S1650	NaN	SLHGEFSASDSsLTDIQETR	NaN	SLHGEFSASDSsLTDIQETR
Rho guanine nucleotide exchange factor 11	ARHGB	O15085	ARHGEF11	S1478	1.25301	WTDGsLSPPAKEPLASDSR	nd
Isoform 6 of Mitogen-activated protein kinase kinase kinase kinase 4	M4K4	O95819-6	MAP4K4	S854	nd		1.19905	IHLLPDLLQQSHSSSTSSTSSSPSSsQPTPTMSPQTPQDK
Kinesin-like protein KIF11	KIF11	P52732	KIF11	S39	nd		3.02559	KASAHsIVECDPVR
Zinc finger CCCH domain-containing protein 18	ZCH18	Q86VM9	ZC3H18	S534	0.753009	LGVSVsPSR	0.882114	LGVSVsPSR
Filamin-A	FLNA	P21333	FLNA	T2599	NaN	tPCEEILVK	3.51128	tPCEEILVK
Proline-rich protein PRCC	PRCC	Q92733	PRCC	S267	nd		1.17759	QITQEEDDsDEEVAPENFFSLPEK
Serum response factor-binding protein 1	SRFB1	Q8NEF9	SRFBP1	S203	1.29443	AVTIANsPSKPSEK	1.59415	AVTIANsPSKPSEK
Eukaryotic translation initiation factor 5B	IF2P	O60841	EIF5B	S183; S190	nd		1.48135	INSsGESGDEsDEFLQSR
Serine/threonine-protein kinase PRP4 homolog	PRP4B	Q13523	PRPF4B	S852	nd		1.23766	LCDFGSASHVADNDITPYLVsR
Isoform 6 of Mitogen-activated protein kinase kinase kinase kinase 4	M4K4	O95819-6	MAP4K4	S775	0.640644	AASSLNLsNGETESVK	0.61735	AASSLNLsNGETESVK
Protein LYRIC	LYRIC	Q86UE4	MTDH	S308	nd		1.43495	WNSVsPASAGK
Elongation factor 1-beta	EF1B	P24534	EEF1B2	S106	1.18463	YGPADVEDTTGSGATDSKDDDDIDLFGsDDEEESEEAKR	NaN	YGPADVEDTTGSGATDSKDDDDIDLFGsDDEEESEEAK
LIM and calponin homology domains-containing protein 1	LIMC1	Q9UPQ0	LIMCH1	S235	nd		1.37345	GSSDGRGSDSEsDLPHR
LIM domain only protein 7	LMO7	Q8WWI1	LMO7	S805	1.58265	MYsFDDVLEEGK	1.5626	MYsFDDVLEEGK
Catenin delta-1	CTND1	O60716	CTNND1	S346	nd		NaN	GsLASLDSLR
cAMP-dependent protein kinase type II-alpha regulatory subunit	KAP2	P13861	PRKAR2A	S99	NaN	RVsVCAETYNPDEEEEDTDPR	1.20112	RVsVCAETYNPDEEEEDTDPR
182 kDa tankyrase-1-binding protein	TB182	Q9C0C2	TNKS1BP1	S221	NaN	GWsQEGPVK	4.54909	GWsQEGPVK
Regulator of nonsense transcripts 1	RENT1	Q92900	UPF1	S1107	nd		0.350419	SQIDVALsQDSTYQGER
Insulin receptor substrate 2	IRS2	Q9Y4H2	IRS2	S915	nd		1.5291	sPGEYINIDFGEPGAR
DNA repair protein XRCC1	XRCC1	P18887	XRCC1	S266	nd		1.27986	KTPSKPPAQLsPSVPK
Serine/arginine repetitive matrix protein 1	SRRM1	Q8IYB3	SRRM1	S597	0.916523	RYsPPIQR	1.02774	RYsPPIQR
Suppressor of fused homolog	SUFU	Q9UMX1	SUFU	S351	nd		NaN	KDSLESDsSTAIIPHELIR
60S acidic ribosomal protein P2	RLA2	P05387	RPLP2	S74	1.11815	LASVPAGGAVAVsAAPGSAAPAAGSAPAAAEEK	nd
DnaJ homolog subfamily C member 5	DNJC5	Q9H3Z4	DNAJC5	T11	nd		1.00511	SLStSGESLYHVLGLDK
Nascent polypeptide-associated complex subunit alpha	NACA	Q13765	NACA	S166	NaN	VQGEAVSNIQENTQTPTVQEEsEEEEVDETGVEVK	nd
Src substrate cortactin	SRC8	Q14247	CTTN	T401	1.34203	TQtPPVSPAPQPTEER	1.78909	TQtPPVSPAPQPTEER
Anillin	ANLN	Q9NQW6	ANLN	S323	NaN	TPIsPLK	1.03813	TPIsPLK
Melanophilin	MELPH	Q9BV36	MLPH	S266	nd		2.30153	AEGLEEADTGASGCHSHPEEQPTSIsPSR
RB1-inducible coiled-coil protein 1	RBCC1	Q8TDY2	RB1CC1	S647	1.09636	ASVSQTsPQSASSPR	0.89716	ASVSQTsPQSASSPR
Colorectal mutant cancer protein	CRCM	P23508	MCC	S294	NaN	LQSVQATGPSsPGR	NaN	LQSVQATGPSsPGR
Golgi-specific brefeldin A-resistance guanine nucleotide exchange factor 1	GBF1	Q92538	GBF1	S1298	0.766738	ADAPDAGAQsDSELPSYHQNDVSLDR	nd
Isoform 2 of Zinc finger Ran-binding domain-containing protein 2	ZRAB2	O95218-2	ZRANB2	S307; S310	nd		1.06605	SRsPEsQVIGENTK
PH and SEC7 domain-containing protein 3	PSD3	Q9NYI0	PSD3	S1012	nd		NaN	SHSsPSLNPDTSPITAK
Kinesin light chain 1	KLC1	Q07866	KLC1	S521	NaN	sRESLNVDVVK	nd
Cytochrome b reductase 1	CYBR1	Q53TN4	CYBRD1	T233	0.613229	EPNStILHPNGGTEQGAR	nd
A-kinase anchor protein 12	AKA12	Q02952	AKAP12	S627; S629	nd		0.827811	RPsEsDKEDELDKVK
Vimentin	VIME	P08670	VIM	S459	NaN	DGQVINETsQHHDDLE	NaN	DGQVINETsQHHDDLE
Serine/arginine repetitive matrix protein 2	SRRM2	Q9UQ35	SRRM2	S1541	0.98702	SGsSQELDVKPSASPQER	0.825787	SGsSQELDVKPSASPQER
Ataxin-2	ATX2	Q99700	ATXN2	S667	nd		1.20288	TsPSGGTWSSVVSGVPR
Tight junction protein ZO-2	ZO2	Q9UDY2	TJP2	S266	1.0242	AYsPEYR	1.00481	AYsPEYR
Coiled-coil domain-containing protein 86	CCD86	Q9H6F5	CCDC86	S91	nd		1.14394	LQQGAGLESPQGQPEPGAAsPQR
Cytospin-A	CYTSA	Q69YQ0	SPECC1L	S384; S385	0.417364	KGssGNASEVSVACLTER	NaN	KGssGNASEVSVACLTER
Microtubule-associated protein 1B	MAP1B	P46821	MAP1B	T1932	nd		0.946519	TTKtPEDGDYSYEIIEK
Cellular tumor antigen p53	P53	P04637	TP53	S315	0.960833	ALPNNTSSsPQPK	1.17093	ALPNNTSSsPQPK
Serine/threonine-protein phosphatase 4 regulatory subunit 2	PP4R2	Q9NY27	PPP4R2	S226	0.917236	NHSDSSTSESEVSSVsPLK	NaN	NHSDSSTSESEVSSVsPLK
Epsin-2	EPN2	O95208	EPN2	S173	0.927906	GSsQPNLSTSHSEQEYGK	1.16732	GSsQPNLSTSHSEQEYGK
Thyroid hormone receptor-associated protein 3	TR150	Q9Y2W1	THRAP3	S315; S320	0.777154	sPVGKsPPSTGSTYGSSQK	1.32757	sPVGKsPPSTGSTYGSSQK; KsPVGKsPPSTGSTYGSSQK
Protein scribble homolog	SCRIB	Q14160	SCRIB	S1220	1.51584	NsLESISSIDR	1.21985	NsLESISSIDR
LIM and calponin homology domains-containing protein 1	LIMC1	Q9UPQ0	LIMCH1	S718	1.03738	sPEPEATLTFPFLDK	1.46033	sPEPEATLTFPFLDK
cAMP-dependent protein kinase type I-alpha regulatory subunit	KAP0	P10644	PRKAR1A	S83	1.38441	EDEIsPPPPNPVVK; TDSREDEIsPPPPNPVVK	2.01621	EDEIsPPPPNPVVK; TDSREDEIsPPPPNPVVK
Osteoclast-stimulating factor 1	OSTF1	Q92882	OSTF1	S213	nd		NaN	TLSNAEDYLDDEDsD
Actin filament-associated protein 1	AFAP1	Q8N556	AFAP1	T689	nd		NaN	TLENSPISSCDTSDtEGPVPVNSAAVLK
Supervillin	SVIL	O95425	SVIL	S968	1.03901	YGsFEEAEASYPILNR	0.947814	YGsFEEAEASYPILNR
Synaptosomal-associated protein 23	SNP23	O00161	SNAP23	T24	NaN	AHQITDESLEStR	nd
E3 ubiquitin-protein ligase CHIP	CHIP	Q9UNE7	STUB1	S19	0.965803	LGAGGGsPEKSPSAQELK	1.03555	LGAGGGsPEKSPSAQELK
Protein XRP2	XRP2	O75695	RP2	S28	nd		NaN	QYsWDQR
Striatin-interacting protein 1	STRP1	Q5VSL9	STRIP1	S59	3.14457	KDsEGYSESPDLEFEYADTDK	4.09264	KDsEGYSESPDLEFEYADTDK
182 kDa tankyrase-1-binding protein	TB182	Q9C0C2	TNKS1BP1	S1385	1.66698	HNGSLsPGLEAR	3.08293	HNGSLsPGLEAR
Isoform 6 of Mitogen-activated protein kinase kinase kinase kinase 4	M4K4	O95819-6	MAP4K4	S1257	nd		NaN	SGGsSQVYFMTLGR
A-kinase anchor protein 2	AKAP2	Q9Y2D5	AKAP2	S748	1.18482	QVLQSTQsPR	1.04709	QVLQSTQsPR
Apoptotic chromatin condensation inducer in the nucleus	ACINU	Q9UKV3	ACIN1	S657	0.685074	SLsPGVSR	1.30262	SLsPGVSR
182 kDa tankyrase-1-binding protein	TB182	Q9C0C2	TNKS1BP1	T1032	nd		1.41041	GSGGLFSPStAHVPDGALGQR
Small acidic protein	SMAP	O00193	SMAP	S17	1.15865	SAsPDDDLGSSNWEAADLGNEER	1.51041	SAsPDDDLGSSNWEAADLGNEER
Clathrin interactor 1	EPN4	Q14677	CLINT1	T294	nd		NaN	TIDLGAAAHYtGDKASPDQNASTHTPQSSVK
BMP-2-inducible protein kinase	BMP2K	Q9NSY1	BMP2K	S1107	1.4915	QNsLHGSFHSADVLK	nd
RNA-binding protein 10	RBM10	P98175	RBM10	S738	0.903427	GLVAAYSGESDsEEEQER	1.25643	GLVAAYSGESDsEEEQER
A-kinase anchor protein 12	AKA12	Q02952	AKAP12	S627	0.541016	RPsESDKEDELDKVK	0.876476	RPsESDKEDELDKVK
Ephrin type-B receptor 2	EPHB2	P29323	EPHB2	S776	nd		1.58283	FLEDDTsDPTYTSALGGK
Dedicator of cytokinesis protein 7	DOCK7	Q96N67	DOCK7	S900	nd		0.809424	SLSNsNPDISGTPTSPDDEVR
Protein bassoon	BSN	Q9UPA5	BSN	T1783	nd		0.05996	QVEQAVQtAPYR
Spindle and kinetochore-associated protein 3	SKA3	Q8IX90	SKA3	S155	nd		NaN	sPQLSDFGLER
RNA-binding protein 5	RBM5	P52756	RBM5	S78	0.697957	SEDGYHsDGDYGEHDYR	0.850374	SEDGYHsDGDYGEHDYR
U2 snRNP-associated SURP motif-containing protein	SR140	O15042	U2SURP	S485	nd		NaN	LYSILQGDsPTK
6-phosphofructo-2-kinase/fructose-2,6-bisphosphatase 3	F263	Q16875	PFKFB3	S461	nd		1.11271	RNsVTPLASPEPTK
Leucine-rich repeat flightless-interacting protein 2	LRRF2	Q9Y608	LRRFIP2	T331	0.95977	GSGDtSSLIDPDTSLSELR	0.847257	GSGDtSSLIDPDTSLSELR
A-kinase anchor protein 2	AKAP2	Q9Y2D5	AKAP2	S785	0.713615	VKPPPSPTTEGPsLQPDLAPEEAAGTQRPK	1.38292	VKPPPSPTTEGPsLQPDLAPEEAAGTQRPK
Sequestosome-1	SQSTM	Q13501	SQSTM1	T269; S272	0.808302	SRLtPVsPESSSTEEK	1.36811	SRLtPVsPESSSTEEK
Thyroid hormone receptor-associated protein 3	TR150	Q9Y2W1	THRAP3	S928	0.783785	WAHDKFsGEEGEIEDDESGTENR	1.02839	FsGEEGEIEDDESGTENREEKDNIQPTTE; WAHDKFsGEEGEIEDDESGTENR
Cytospin-A	CYTSA	Q69YQ0	SPECC1L	S384	0.538235	KGsSGNASEVSVACLTER	0.616984	KGsSGNASEVSVACLTER
AP2-associated protein kinase 1	AAK1	Q2M2I8	AAK1	T606	1.46697	VQTtPPPAVQGQK	0.914449	VQTtPPPAVQGQK
Supervillin	SVIL	O95425	SVIL	S238	nd		0.554685	DSsFTEVPRSPK
H/ACA ribonucleoprotein complex non-core subunit NAF1	NAF1	Q96HR8	NAF1	S315	1.24822	NDQEPPPEALDFsDDEKEK	NaN	NDQEPPPEALDFsDDEKEK
Conserved oligomeric Golgi complex subunit 2	COG2	Q14746	COG2	S682; S686	NaN	KTTPANPVGPsGGMsDDDK	nd
Striatin	STRN	O43815	STRN	S376	nd		4.43192	DVDELPSLQPSVGsPSRPSSSR
RING finger protein 219	RN219	Q5W0B1	RNF219	S719	nd		1.88071	IQSSLSSAsPSK
CTTNBP2 N-terminal-like protein	CT2NL	Q9P2B4	CTTNBP2NL	S488	4.38926	DLsPTLIDNSAAK	6.35689	DLsPTLIDNSAAK
Serine/arginine-rich splicing factor 6	SRSF6	Q13247	SRSF6	S301	1.04661	sNSPLPVPPSK	1.18582	sNSPLPVPPSK
Leucine-rich repeat flightless-interacting protein 1	LRRF1	Q32MZ4	LRRFIP1	S16	NaN	EIDCLsPEAQK	nd
Thyroid hormone receptor-associated protein 3	TR150	Q9Y2W1	THRAP3	S535	NaN	SSsPPPR	nd
Filamin-A	FLNA	P21333	FLNA	S2152	2.80421	APsVANVGSHCDLSLK; RAPsVANVGSHCDLSLK	3.40337	APsVANVGSHCDLSLK; RAPsVANVGSHCDLSLK
Ephrin type-A receptor 2	EPHA2	P29317	EPHA2	S897	nd		1.34253	LPsTSGSEGVPFR
Isoform 6 of Mitogen-activated protein kinase kinase kinase kinase 4	M4K4	O95819-6	MAP4K4	S613	nd		NaN	DSPLQGsGQQNSQAGQR
Solute carrier family 12 member 4	S12A4	Q9UP95	SLC12A4	S967	nd		1.68387	LESLYsDEEDESAVGADK
Isoform 6 of Mitogen-activated protein kinase kinase kinase kinase 4	M4K4	O95819-6	MAP4K4	S888	0.878831	SSsSFTPFIDPR	0.638777	SSsSFTPFIDPR
Bcl-2-associated transcription factor 1	BCLF1	Q9NYF8	BCLAF1	S385	NaN	AEGEWEDQEALDYFsDK; AEGEWEDQEALDYFsDKESGK	1.0862	AEGEWEDQEALDYFsDKESGK
Gamma-adducin	ADDG	Q9UEY8	ADD3	S677; S681	nd		2.30029	IEEVLSPEGsPSKsPSK
Neuroblast differentiation-associated protein AHNAK	AHNK	Q09666	AHNAK	S5749; S5763	1.34954	AsLGSLEGEAEAEASsPK	1.32455	AsLGSLEGEAEAEASsPK
[F-actin]-monooxygenase MICAL3	MICA3	Q7RTP6	MICAL3	S1310	nd		NaN	LGsPLAVDEALR
Microtubule-associated protein 1B	MAP1B	P46821	MAP1B	S1501	1.68359	LGDVsPTQIDVSQFGSFK	1.53444	LGDVsPTQIDVSQFGSFK
Jupiter microtubule associated homolog 1	JUPI1	Q9UK76	JPT1	S88	0.834257	RNSsEASSGDFLDLK	1.2	RNSsEASSGDFLDLK
Bcl-2-associated transcription factor 1	BCLF1	Q9NYF8	BCLAF1	S660	0.837802	RIDISPsTLR	nd
Transcription factor jun-D	JUND	P17535	JUND	S100	0.887033	LAsPELER	1.53977	LAsPELER
E3 ubiquitin-protein ligase HECTD1	HECD1	Q9ULT8	HECTD1	S1387	nd		NaN	KGSSSsVCSVASSSDISLGSTK
Beta-1-syntrophin	SNTB1	Q13884	SNTB1	S219	1.02613	GSPVSEIGWETPPPEsPR; KGSPVSEIGWETPPPEsPR	1.3019	GSPVSEIGWETPPPEsPR; KGSPVSEIGWETPPPEsPR
Striatin-4	STRN4	Q9NRL3	STRN4	S206	nd		2.60733	sLELNGAVEPSEGAPR
Pumilio homolog 1	PUM1	Q14671	PUM1	S709	nd		NaN	RDsLTGSSDLYK
Actin-binding LIM protein 3	ABLM3	O94929	ABLIM3	S373	NaN	ASsPGYIDSPTYSR	0.876413	ASsPGYIDSPTYSR
Protein bicaudal D homolog 2	BICD2	Q8TD16	BICD2	S582	nd		1.29763	sPILLPK
Proliferation marker protein Ki-67	KI67	P46013	MKI67	S308	1.0462	SGGSGHAVAEPAsPEQELDQNK	1.72244	SGGSGHAVAEPAsPEQELDQNK
E3 ubiquitin-protein ligase NEDD4-like	NED4L	Q96PU5	NEDD4L	S449	nd		NaN	SLSsPTVTLSAPLEGAK
Sequestosome-1	SQSTM	Q13501	SQSTM1	T269	0.776317	SRLtPVSPESSSTEEK	0.960638	SRLtPVSPESSSTEEK
182 kDa tankyrase-1-binding protein	TB182	Q9C0C2	TNKS1BP1	S1383	nd		NaN	HNGsLSPGLEAR
Protein PAT1 homolog 1	PATL1	Q86TB9	PATL1	S179	nd		1.51149	STsPIIGSPPVR
Pre-mRNA 3'-end-processing factor FIP1	FIP1	Q6UN15	FIP1L1	S492	0.83735	DHsPTPSVFNSDEER; ERDHsPTPSVFNSDEER	1.24688	DHsPTPSVFNSDEER; ERDHsPTPSVFNSDEER
Tight junction protein ZO-1	ZO1	Q07157	TJP1	S277	0.932053	ATLLNVPDLSDsIHSANASER	0.917248	ATLLNVPDLSDsIHSANASER
Phostensin	PPR18	Q6NYC8	PPP1R18	S195	nd		0.893026	WRLsPGETPER
Dihydropyrimidinase-related protein 3	DPYL3	Q14195	DPYSL3	T524	nd		1.56503	GSPtRPNPPVR
Elongation factor 1-delta	EF1D	P29692	EEF1D	T147; S162	nd		NaN	KPAtPAEDDEDDDIDLFGsDNEEEDKEAAQLR
Vesicle-associated membrane protein-associated protein A	VAPA	Q9P0L0	VAPA	S214	nd		0.997345	VAHSDKPGsTSTASFR
40S ribosomal protein S3	RS3	P23396	RPS3	T221	1.04934	DEILPTtPISEQK	1.28828	DEILPTtPISEQK
General transcription factor IIF subunit 1	T2FA	P35269	GTF2F1	T389	1.59822	GNSRPGtPSAEGGSTSSTLR	nd
Neuroblast differentiation-associated protein AHNAK	AHNK	Q09666	AHNAK	S5752; S5763	1.20736	ASLGsLEGEAEAEASsPK	1.26575	ASLGsLEGEAEAEASsPK
Microtubule-associated protein 1B	MAP1B	P46821	MAP1B	T1282	nd		2.1406	SVNFSLtPNEIK
Serine/arginine repetitive matrix protein 2	SRRM2	Q9UQ35	SRRM2	T2409; S2412	nd		0.925164	SRtPPsAPSQSR
Isoform 6 of Mitogen-activated protein kinase kinase kinase kinase 4	M4K4	O95819-6	MAP4K4	S608	0.996028	RDsPLQGSGQQNSQAGQR; DsPLQGSGQQNSQAGQR	0.938048	RDsPLQGSGQQNSQAGQR; DsPLQGSGQQNSQAGQR
Bcl-2-associated transcription factor 1	BCLF1	Q9NYF8	BCLAF1	S290	0.896834	YSPSQNsPIHHIPSR	1.16016	YSPSQNsPIHHIPSR
Zyxin	ZYX	Q15942	ZYX	S281	nd		0.216815	FsPGAPGGSGSQPNQK
Filamin-A	FLNA	P21333	FLNA	S2128	NaN	FADQHVPGsPFSVK	2.53453	FADQHVPGsPFSVK
Protein PAXX	PAXX	Q9BUH6	PAXX	S148	0.735865	LAAAEETAVsPR	0.770523	LAAAEETAVsPR
AT-rich interactive domain-containing protein 1A	ARI1A	O14497	ARID1A	S696	nd		NaN	GPsPSPVGSPASVAQSR
40S ribosomal protein S6	RS6	P62753	RPS6	S235; S236; S240	nd		0.741333	RLssLRAsTSK
Transcription intermediary factor 1-beta	TIF1B	Q13263	TRIM28	S601	nd		NaN	LASPSGSTSsGLEVVAPEGTSAPGGGPGTLDDSATICR
Trinucleotide repeat-containing gene 6A protein	TNR6A	Q8NDV7	TNRC6A	S943	nd		NaN	SNQSLGWGDSSKPVSsPDWNK
Protein phosphatase Slingshot homolog 2	SSH2	Q76I76	SSH2	S899	nd		2.62121	KNsKNDSSVADLAPK
FK506-binding protein 15	FKB15	Q5T1M5	FKBP15	S956	0.995085	RPsQEQSASASSGQPQAPLNR	nd
Partitioning defective 3 homolog	PARD3	Q8TEW0	PARD3	S728	nd		4.18473	ISHSLYSGIEGLDEsPSR
Vimentin	VIME	P08670	VIM	S39	4.12125	TYsLGSALRPSTSR	2.93645	TYsLGSALRPSTSR
Ataxin-2	ATX2	Q99700	ATXN2	S784	nd		NaN	GIsPVVSEHR
Isoform 2 of NADH dehydrogenase [ubiquinone] flavoprotein 3, mitochondrial	NDUV3	P56181-2	NDUFV3	S160	nd		0.49624	KVTSPSSSSSSSSsDSESDDEADVSEVTPR
Sorbin and SH3 domain-containing protein 2	SRBS2	O94875	SORBS2	S302	NaN	SFTSSSPSsPSR	NaN	SFTSSSPSsPSR
COP9 signalosome complex subunit 1	CSN1	Q13098	GPS1	S474	nd		1.27583	EGsQGELTPANSQSR
Serine/arginine-rich splicing factor 9	SRSF9	Q13242	SRSF9	S189	0.791138	STsYGYSR	1.09197	STsYGYSR
Leucine zipper putative tumor suppressor 2	LZTS2	Q9BRK4	LZTS2	S570	NaN	AAAGVGGsLR	1.04001	AAAGVGGsLR
Mapk-regulated corepressor-interacting protein 1	MCRI1	C9JLW8	MCRIP1	S21	1.3857	sPPSSSEIFTPAHEENVR	1.35719	sPPSSSEIFTPAHEENVR
Phosphatidylinositol 4-phosphate 3-kinase C2 domain-containing subunit alpha	P3C2A	O00443	PIK3C2A	S338	2.41492	SQsLNIR	NaN	SQsLNIR
Unconventional myosin-IXb	MYO9B	Q13459	MYO9B	S1290	0.951362	VQEKPDsPGGSTQIQR	0.963326	VQEKPDsPGGSTQIQR
60S ribosomal protein L30	RL30	P62888	RPL30	S10	nd		NaN	sLESINSR
A-kinase anchor protein 12	AKA12	Q02952	AKAP12	S629	nd		0.876476	RPSEsDKEDELDKVK
Nucleolar protein 8	NOL8	Q76FK4	NOL8	S1099	NaN	NSsPGEASLLEK	nd
Unconventional myosin-Ic	MYO1C	O00159	MYO1C	S408	0.836286	DVEsPSWR	1.25676	DVEsPSWR
Myosin phosphatase Rho-interacting protein	MPRIP	Q6WCQ1	MPRIP	S269	nd		NaN	VESGYFsLEK
E3 UFM1-protein ligase 1	UFL1	O94874	UFL1	S458	NaN	KDDDsDDESQSSHTGK	nd
Cyclin-Y	CCNY	Q8ND76	CCNY	S25	1.56347	LEsYRPDTDLSR	1.68878	LEsYRPDTDLSR
Putative annexin A2-like protein	AXA2L	A6NMY6	ANXA2P2	S18	0.90838	LSLEGDHsTPPSAYGSVK	1.19889	LSLEGDHsTPPSAYGSVK
14-3-3 protein theta	1433T	P27348	YWHAQ	T229	NaN	DNLTLWtSDSAGEECDAAEGAEN	nd
Heterogeneous nuclear ribonucleoprotein A1	ROA1	P09651	HNRNPA1	S4	nd		1.31173	sESPKEPEQLRK
LIM domain only protein 7	LMO7	Q8WWI1	LMO7	S246	1.61068	REDsFESLDSLGSR	1.99201	EDsFESLDSLGSR; REDsFESLDSLGSR
Anaphase-promoting complex subunit CDC26	CDC26	Q8NHZ8	CDC26	S42	0.603992	QKEDVEVVGGsDGEGAIGLSSDPK	nd
CTTNBP2 N-terminal-like protein	CT2NL	Q9P2B4	CTTNBP2NL	S523	4.76025	FTSQQGPIKPVsPNSSPFGTDYR	4.017	FTSQQGPIKPVsPNSSPFGTDYR
Myristoylated alanine-rich C-kinase substrate	MARCS	P29966	MARCKS	S27	1.7139	GEAAAERPGEAAVASsPSK	1.98131	GEAAAERPGEAAVASsPSK
BMP-2-inducible protein kinase	BMP2K	Q9NSY1	BMP2K	S14	1.13997	SEGGsGGGAAGGGAGGAGAGAGCGSGGSSVGVR	NaN	SEGGsGGGAAGGGAGGAGAGAGCGSGGSSVGVR
2-oxoisovalerate dehydrogenase subunit alpha, mitochondrial	ODBA	P12694	BCKDHA	S347	nd		NaN	sVDEVNYWDK
Plectin	PLEC	Q15149	PLEC	S4386; S4389	0.388794	SSsVGsSSSYPISPAVSR	0.387439	SSsVGsSSSYPISPAVSR
Tight junction protein ZO-2	ZO2	Q9UDY2	TJP2	S130	1.1189	KVQVAALQAsPPLDQDDR	0.981774	KVQVAALQAsPPLDQDDR
Bcl-2-associated transcription factor 1	BCLF1	Q9NYF8	BCLAF1	S222	nd		1.44722	SSATSGDIWPGLSAYDNsPR
40S ribosomal protein S27	RS27	P42677	RPS27	S11	NaN	DLLHPsPEEEK	0.974175	DLLHPsPEEEK
Myosin phosphatase Rho-interacting protein	MPRIP	Q6WCQ1	MPRIP	S220; S224	NaN	TKDQPDGSSLsPAQsPSQSQPPAASSLR	0.635288	TKDQPDGSSLsPAQsPSQSQPPAASSLR
Anaphase-promoting complex subunit 1	APC1	Q9H1A4	ANAPC1	S688	nd		2.02382	NFDFEGSLsPVIAPK
Catenin delta-1	CTND1	O60716	CTNND1	S230	0.85435	HYEDGYPGGSDNYGsLSR	0.773434	HYEDGYPGGSDNYGsLSR
Cytospin-B	CYTSB	Q5M775	SPECC1	S425	0.394549	TILETsFHQHR	0.566715	TILETsFHQHR
Angiomotin	AMOT	Q4VCS5	AMOT	S714	nd		NaN	DTTVISHsPNTSYDTALEAR
Spindlin interactor and repressor of chromatin-binding protein	SPNDC	Q9BUA3	SPINDOC	S148; S152	0.647307	AEQPsPPNsDSGQDAHPDPDANPDAAR	1.07821	AEQPsPPNsDSGQDAHPDPDANPDAAR
TP53-binding protein 1	TP53B	Q12888	TP53BP1	S500	nd		1.03265	NsPEDLGLSLTGDSCK
Coordinator of PRMT5 and differentiation stimulator	COPRS	Q9NQ92	COPRS	T59	nd		NaN	GtQSIPNDSPAR
Unconventional myosin-XVIIIa	MY18A	Q92614	MYO18A	S140	NaN	RFsFSQR	1.3376	RFsFSQR
Supervillin	SVIL	O95425	SVIL	S920	NaN	FSSSIENSDsPVR	NaN	FSSSIENSDsPVR
Tetratricopeptide repeat protein 7B	TTC7B	Q86TV6	TTC7B	S160	nd		1.05983	LPISSsTSNLHVDR
OTU domain-containing protein 4	OTUD4	Q01804	OTUD4	S1024	nd		3.07483	EESsEDENEVSNILR
60S ribosomal protein L4	RL4	P36578	RPL4	S295	1.21738	ILKsPEIQR	1.38277	ILKsPEIQR
Zinc finger protein 185	ZN185	O15231	ZNF185	S468	nd		NaN	RESCGsSVLTDFEGK
Serine/arginine repetitive matrix protein 2	SRRM2	Q9UQ35	SRRM2	T2069; S2071	0.62002	SLtRsPPAIR	0.941076	SLtRsPPAIR
Microtubule-associated protein 1B	MAP1B	P46821	MAP1B	S1400	nd		1.49213	sPPLIGSESAYESFLSADDK
Cytochrome b reductase 1	CYBR1	Q53TN4	CYBRD1	S232	nd		1.53751	EPNsTILHPNGGTEQGAR
Signal-induced proliferation-associated 1-like protein 1	SI1L1	O43166	SIPA1L1	S1585	0.676863	TLsDESIYNSQR	0.943102	TLsDESIYNSQR
Treacle protein	TCOF	Q13428	TCOF1	S1111	NaN	TQPSSGVDSAVGTLPATsPQSTSVQAK	nd
Serine/arginine-rich splicing factor 3	SRSF3	P84103	SRSF3	S108	0.808338	RRsPPPR	nd
Transcription initiation factor TFIID subunit 12	TAF12	Q16514	TAF12	S51	nd		NaN	LsPENNQVLTK
Septin-2	SEPT2	Q15019	SEPT2	S218	1.17031	IYHLPDAEsDEDEDFK; IYHLPDAEsDEDEDFKEQTR	1.24957	IYHLPDAEsDEDEDFK; IYHLPDAEsDEDEDFKEQTR
FERM, ARHGEF and pleckstrin domain-containing protein 1	FARP1	Q9Y4F1	FARP1	T24	0.690163	LGAPENSGIStLER	NaN	LGAPENSGIStLER
Microtubule-associated protein 1B	MAP1B	P46821	MAP1B	T1964	1.56979	TtSPPEVSGYSYEK	1.4007	TtSPPEVSGYSYEK
LIM domain only protein 7	LMO7	Q8WWI1	LMO7	S1586	1.16124	TSTTGVATTQsPTPR	1.44289	TSTTGVATTQsPTPR
La-related protein 1	LARP1	Q6PKG0	LARP1	S766; S774	nd		0.759341	sLPTTVPEsPNYR
Tight junction protein ZO-1	ZO1	Q07157	TJP1	S1617	NaN	AIPVsPSAVEEDEDEDGHTVVATAR	1.21421	AIPVsPSAVEEDEDEDGHTVVATAR
60S acidic ribosomal protein P0	RLA0	P05388	RPLP0	S307	NaN	EESEEsDEDMGFGLFD	NaN	EESEEsDEDMGFGLFD
Serine/arginine repetitive matrix protein 2	SRRM2	Q9UQ35	SRRM2	T2397	0.918005	tSPPLLDR	nd
Microtubule-associated protein 1B	MAP1B	P46821	MAP1B	S614	1.27388	EVPSKEEPsPVKAEVAEK	1.37621	EVPSKEEPsPVKAEVAEK
Microtubule-associated protein 1S	MAP1S	Q66K74	MAP1S	S657	1.09697	LSLsPLR	NaN	LSLsPLR
Plectin	PLEC	Q15149	PLEC	S4396	NaN	SSSVGSSSSYPIsPAVSR	nd
Receptor-binding cancer antigen expressed on SiSo cells	RCAS1	O00559	EBAG9	S36	nd		NaN	KLsGDQITLPTTVDYSSVPK
Alpha-taxilin	TXLNA	P40222	TXLNA	S515	0.946468	RPEGPGAQAPSsPR	1.12941	RPEGPGAQAPSsPR
ESF1 homolog	ESF1	Q9H501	ESF1	S198	0.404723	TLDSGTSEIVKsPR	nd
Ras GTPase-activating protein-binding protein 2	G3BP2	Q9UN86	G3BP2	T227	1.01097	STtPPPAEPVSLPQEPPK	1.52518	STtPPPAEPVSLPQEPPK
TRAF-type zinc finger domain-containing protein 1	TRAD1	O14545	TRAFD1	S415	nd		NaN	LDSQPQETsPELPR
Cyclin-Y	CCNY	Q8ND76	CCNY	T103	nd		1.11956	YSSCStIFLDDSTVSQPNLK; KYSSCStIFLDDSTVSQPNLK
Kinesin-like protein KIF11	KIF11	P52732	KIF11	T925	nd		1.28317	LDIPTGtTPQR
Isoform 6 of Mitogen-activated protein kinase kinase kinase kinase 4	M4K4	O95819-6	MAP4K4	T124	nd		0.788864	GNtLKEDWIAYISR
Isoform 6 of Mitogen-activated protein kinase kinase kinase kinase 4	M4K4	O95819-6	MAP4K4	S878	nd		NaN	LTANETQSAsSTLQK
Isoform 6 of Mitogen-activated protein kinase kinase kinase kinase 4	M4K4	O95819-6	MAP4K4	S680	NaN	SSsKSEGSPSQR	nd
LIM domain only protein 7	LMO7	Q8WWI1	LMO7	S1026	0.891567	ATLSSTSGLDLMSESGEGEIsPQR	1.71397	ATLSSTSGLDLMSESGEGEIsPQR
Spectrin alpha chain, non-erythrocytic 1	SPTN1	Q13813	SPTAN1	S1217	NaN	sLQQLAEER	0.82653	sLQQLAEER
RNA-binding protein 10	RBM10	P98175	RBM10	S797	nd		1.04569	AHLsENELEALEK
Serine/arginine-rich splicing factor 7	SRSF7	Q16629	SRSF7	S194	0.866452	YFQSPsR	1.00713	YFQSPsR
General transcription factor 3C polypeptide 3	TF3C3	Q9Y5Q9	GTF3C3	S43	nd		1.52664	GKLsAEENPDDSEVPSSSGINSTK
Proto-oncogene tyrosine-protein kinase Src	SRC	P12931	SRC	S17	0.659211	sLEPAENVHGAGGGAFPASQTPSKPASADGHR	nd
Cyclin-H	CCNH	P51946	CCNH	T315	NaN	HEEEEWtDDDLVESL	nd
Insulin receptor substrate 1	IRS1	P35568	IRS1	S1078	nd		NaN	VNLsPNR
ATP-dependent RNA helicase DHX29	DHX29	Q7Z478	DHX29	S200	nd		0.906606	FQSPQIQATIsPPLQPK
La-related protein 1	LARP1	Q6PKG0	LARP1	S548	NaN	GLSAsLPDLDSENWIEVK	nd
Drebrin	DREB	Q16643	DBN1	S272	1.18755	KsESEVEEAAAIIAQRPDNPR	nd
Calmodulin-regulated spectrin-associated protein 2	CAMP2	Q08AD1	CAMSAP2	S464	1.53399	SIsNEGLTLNNSHVSK	1.17876	SIsNEGLTLNNSHVSK
Cytospin-B	CYTSB	Q5M775	SPECC1	S847	nd		NaN	sPLSGIPVR
Serine/threonine-protein kinase RIO1	RIOK1	Q9BRS2	RIOK1	S22	0.747184	VVPGQFDDADSsDSENR	0.738764	VVPGQFDDADSsDSENR
E3 ubiquitin-protein ligase UBR4	UBR4	Q5T4S7	UBR4	S365	nd		1.24287	TGSTSsKEDDYESDAATIVQK
Isoform 6 of Mitogen-activated protein kinase kinase kinase kinase 4	M4K4	O95819-6	MAP4K4	T181	nd		0.70676	LVDFGVSAQLDRtVGR
Lupus La protein	LA	P05455	SSB	S366	1.55667	FAsDDEHDEHDENGATGPVK	1.61661	TKFAsDDEHDEHDENGATGPVK; FAsDDEHDEHDENGATGPVK; FAsDDEHDEHDENGATGPVKR
La-related protein 4B	LAR4B	Q92615	LARP4B	S601	nd		0.996331	SPsPAHLPDDPK
Mitogen-activated protein kinase 6	MK06	Q16659	MAPK6	S189	1.04959	GHLsEGLVTK	1.3912	GHLsEGLVTK
OTU domain-containing protein 4	OTUD4	Q01804	OTUD4	S1006	NaN	TAADVVsPGANSVDSR	1.93592	TAADVVsPGANSVDSR
Isoform 6 of Mitogen-activated protein kinase kinase kinase kinase 4	M4K4	O95819-6	MAP4K4	T949	0.601473	GSVVNVNPTNTRPQSDtPEIR; KGSVVNVNPTNTRPQSDtPEIR	0.773077	GSVVNVNPTNTRPQSDtPEIR; KGSVVNVNPTNTRPQSDtPEIR
Vimentin	VIME	P08670	VIM	S56	2.55492	SLYASsPGGVYATR	1.85753	SLYASsPGGVYATR
Neuroblast differentiation-associated protein AHNAK	AHNK	Q09666	AHNAK	S93	1.03008	KGDRsPEPGQTWTR; sPEPGQTWTR; GDRsPEPGQTWTR	1.27337	KGDRsPEPGQTWTR; sPEPGQTWTR; GDRsPEPGQTWTR
Beta-2-syntrophin	SNTB2	Q13425	SNTB2	S95	0.971898	GLGPPsPPAPPR	1.09886	GLGPPsPPAPPR
NF-kappa-B-activating protein	NKAP	Q8N5F7	NKAP	S149	0.997906	IGELGAPEVWGLsPK	1.21679	IGELGAPEVWGLsPK
Ankyrin repeat domain-containing protein 17	ANR17	O75179	ANKRD17	S2067	0.690513	NSPLDCGSAsPNK	1.05959	NSPLDCGSAsPNK
Proliferation marker protein Ki-67	KI67	P46013	MKI67	S357	nd		1.43514	TPVQYSQQQNsPQK
Putative 3-phosphoinositide-dependent protein kinase 2	PDPK2	Q6A1A2	PDPK2P	S214	nd		1.18737	ANsFVGTAQYVSPELLTEK
Src substrate cortactin	SRC8	Q14247	CTTN	S418	1.4795	LPSsPVYEDAASFK	1.94186	LPSsPVYEDAASFK
Serine/arginine repetitive matrix protein 2	SRRM2	Q9UQ35	SRRM2	S2692; S2694	0.957034	SLsYsPVER	0.966784	SLsYsPVER
Influenza virus NS1A-binding protein	NS1BP	Q9Y6Y0	IVNS1ABP	S277	1.52524	QISSSSTGCLSsPNATVQSPK	1.98095	QISSSSTGCLSsPNATVQSPK
Protein ITPRID2	ITPI2	P28290	ITPRID2	S668	NaN	SLAsIEAK	NaN	SLAsIEAK
Serine/arginine repetitive matrix protein 2	SRRM2	Q9UQ35	SRRM2	T1205	nd		NaN	DtLRTPPR
Sec1 family domain-containing protein 1	SCFD1	Q8WVM8	SCFD1	S303	NaN	VNLEESSGVENsPAGARPK	1.20273	VNLEESSGVENsPAGARPK
Torsin-1A-interacting protein 1	TOIP1	Q5JTV8	TOR1AIP1	S156	NaN	DSHsSEEDEASSQTDLSQTISK	0.708365	DSHsSEEDEASSQTDLSQTISK
Arf-GAP domain and FG repeat-containing protein 1	AGFG1	P52594	AGFG1	S181	0.69057	GTPSQsPVVGR	NaN	GTPSQsPVVGR
Myosin light chain kinase, smooth muscle	MYLK	Q15746	MYLK	S1776	nd		NaN	SSTGsPTSPLNAEK
Striatin	STRN	O43815	STRN	S245	2.57519	FLESAAADFsDEDEDDDVDGR	3.79567	FLESAAADFsDEDEDDDVDGR
Peroxisomal membrane protein PEX14	PEX14	O75381	PEX14	S232	nd		NaN	QFPPsPSAPK
RNA-binding protein Raly	RALY	Q9UKM9	RALY	S135	NaN	GRLsPVPVPR	1.07569	GRLsPVPVPR
Protein EFR3 homolog A	EFR3A	Q14156	EFR3A	S694	0.705077	LSVPYVPQVTDEDRLsR	nd
Catenin delta-1	CTND1	O60716	CTNND1	S864	NaN	SQSSHsYDDSTLPLIDR	1.31377	SQSSHsYDDSTLPLIDR
WD repeat-containing protein 26	WDR26	Q9H7D7	WDR26	S123	nd		NaN	RLSQsDEDVIR
Microtubule-actin cross-linking factor 1, isoforms 1/2/3/5	MACF1	Q9UPN3	MACF1	S7333	nd		1.53286	RGSDAsDFDLLETQSACSDTSESSAAGGQGNSR
Heterogeneous nuclear ribonucleoprotein A1	ROA1	P09651	HNRNPA1	S362	nd		0.969877	NQGGYGGSSsSSSYGSGR
Serine/threonine-protein kinase Nek1	NEK1	Q96PY6	NEK1	S1052	nd		NaN	TCsLPDLSK
LIM domain and actin-binding protein 1	LIMA1	Q9UHB6	LIMA1	S132	nd		NaN	LRsPPEALVQGR
Phosphatidylinositol 4-phosphate 3-kinase C2 domain-containing subunit alpha	P3C2A	O00443	PIK3C2A	S259	1.71466	VSNLQVsPK	1.7318	VSNLQVsPK
Tight junction-associated protein 1	TJAP1	Q5JTD0	TJAP1	S300	nd		1.80969	GsPEEELPLPAFEK
Synergin gamma	SYNRG	Q9UMZ2	SYNRG	S752	NaN	QLsLEGSGLGVEDLK	nd
La-related protein 1	LARP1	Q6PKG0	LARP1	S546	nd		NaN	GLsASLPDLDSENWIEVK
Tyrosine-protein phosphatase non-receptor type 14	PTN14	Q15678	PTPN14	S594	1.22267	YVSGSsPDLVTR	1.9905	YVSGSsPDLVTR
Signal-induced proliferation-associated 1-like protein 1	SI1L1	O43166	SIPA1L1	S1565	0.596608	FHALSsPQSPFPSTPTSR	0.466669	FHALSsPQSPFPSTPTSR
Protein transport protein Sec31A	SC31A	O94979	SEC31A	T1165	nd		NaN	EQTLSPtITSGLHNIAR
Gap junction alpha-1 protein	CXA1	P17302	GJA1	S255	0.669075	SDPYHATSGALsPAK	1.2274	SDPYHATSGALsPAK
Rho GTPase-activating protein 5	RHG05	Q13017	ARHGAP5	S1218	nd		0.615047	GGIDNPAITsDQELDDKK
GDP-L-fucose synthase	FCL	Q13630	TSTA3	S203	nd		NaN	SSGsALTVWGTGNPR
Nuclear fragile X mental retardation-interacting protein 2	NUFP2	Q7Z417	NUFIP2	S112	nd		NaN	NLsSDEATNPISR
Serine/arginine-rich splicing factor 6	SRSF6	Q13247	SRSF6	S118	nd		NaN	LIVENLsSR
Apoptotic chromatin condensation inducer in the nucleus	ACINU	Q9UKV3	ACIN1	S1004	0.820852	TAQVPsPPR	1.09814	TAQVPsPPR
Isoform 6 of Mitogen-activated protein kinase kinase kinase kinase 4	M4K4	O95819-6	MAP4K4	S889	0.741577	SSSsFTPFIDPR	0.726364	SSSsFTPFIDPR
Isoform 6 of Mitogen-activated protein kinase kinase kinase kinase 4	M4K4	O95819-6	MAP4K4	S887	nd		0.723108	SsSSFTPFIDPR
Serine/arginine repetitive matrix protein 2	SRRM2	Q9UQ35	SRRM2	S780	0.786851	SLsGSSPCPK	0.920642	SLsGSSPCPK
Nuclear fragile X mental retardation-interacting protein 2	NUFP2	Q7Z417	NUFIP2	S652	1.15447	NDsWGSFDLR	1.28495	NDsWGSFDLR
Cyclin-dependent kinase 12	CDK12	Q9NYV4	CDK12	S1083	nd		0.806571	NSsPAPPQPAPGK
Multiple PDZ domain protein	MPDZ	O75970	MPDZ	T345	0.834121	TAPtALGITLSSSPTSTPELR	nd
Tight junction protein ZO-1	ZO1	Q07157	TJP1	S297	nd		1.02421	DDISEIQSLAsDHSGR
Protein eva-1 homolog A	EVA1A	Q9H8M9	EVA1A	S114	NaN	NVFTsAEELER	NaN	NVFTsAEELER
Vimentin	VIME	P08670	VIM	T426	nd		1.00927	EtNLDSLPLVDTHSK
Partitioning defective 3 homolog	PARD3	Q8TEW0	PARD3	S144	1.01826	RSsDPALIGLSTSVSDSNFSSEEPSR	NaN	RSsDPALIGLSTSVSDSNFSSEEPSR
Src substrate cortactin	SRC8	Q14247	CTTN	T399; S405	nd		2.07724	tQTPPVsPAPQPTEER
Bcl-2-associated transcription factor 1	BCLF1	Q9NYF8	BCLAF1	S658	0.785947	RIDIsPSTLR; IDIsPSTLR	1.25192	RIDIsPSTLR; IDIsPSTLR
Protein TANC2	TANC2	Q9HCD6	TANC2	S169	nd		NaN	DCSYGAVTsPTSTLESR
MAP7 domain-containing protein 1	MA7D1	Q3KQU3	MAP7D1	S460	NaN	LSASTASELsPK	1.25971	LSASTASELsPK
Heterogeneous nuclear ribonucleoprotein K	HNRPK	P61978	HNRNPK	S379	1.08945	GsYGDLGGPIITTQVTIPK	1.25232	GsYGDLGGPIITTQVTIPK
Centrosomal protein of 170 kDa	CE170	Q5SW79	CEP170	T503	NaN	NQATSATSEKDNDDDQSDKGTYtIELENPNSEEVEAR	nd
RB1-inducible coiled-coil protein 1	RBCC1	Q8TDY2	RB1CC1	S642	nd		0.89716	AsVSQTSPQSASSPR
Zinc finger protein 185	ZN185	O15231	ZNF185	S453	NaN	QSsPSGSEQLVR	NaN	QSsPSGSEQLVR
LIM and calponin homology domains-containing protein 1	LIMC1	Q9UPQ0	LIMCH1	S303	1.35191	SWSTATsPLGGERPFR	1.29109	SWSTATsPLGGERPFR
Protein LSM14 homolog A	LS14A	Q8ND56	LSM14A	S183	1.08414	SsPQLDPLRK; SsPQLDPLR	1.32742	SsPQLDPLRK; SsPQLDPLR
Microtubule-associated protein 4	MAP4	P27816	MAP4	S280	nd		1.77308	DMEsPTKLDVTLAK
RNA-binding protein 15	RBM15	Q96T37	RBM15	S670; S674	nd		1.14043	HCAPsPDRsPELSSSR
Formin-like protein 2	FMNL2	Q96PY5	FMNL2	S171	0.509744	sIEDLHR	0.732953	sIEDLHR
Isoform Beta-2 of Protein phosphatase 1B	PPM1B	O75688-2	PPM1B	S376	1.40031	LNPHREsDGGAGDLEDPW	NaN	LNPHREsDGGAGDLEDPW
Nuclease-sensitive element-binding protein 1	YBOX1	P67809	YBX1	S165; S174	nd		1.15818	NYQQNYQNsESGEKNEGsESAPEGQAQQR
OTU domain-containing protein 4	OTUD4	Q01804	OTUD4	S443	nd		2.49261	ESNYFGLsPEER
Drebrin	DREB	Q16643	DBN1	S274	nd		2.15568	SEsEVEEAAAIIAQRPDNPR
Disks large-associated protein 4	DLGP4	Q9Y2H0	DLGAP4	T915	NaN	ANSWQLVEtPEKR	0.811301	ANSWQLVEtPEKR
Discoidin, CUB and LCCL domain-containing protein 2	DCBD2	Q96PD2	DCBLD2	T722	nd		1.87817	tDSCSSAQAQYDTPK
Neuroblast differentiation-associated protein AHNAK	AHNK	Q09666	AHNAK	T5839	1.23293	GHYEVtGSDDETGKLQGSGVSLASK	nd
OTU domain-containing protein 4	OTUD4	Q01804	OTUD4	S1023; S1024	0.950173	EEssEDENEVSNILR	1.44371	EEssEDENEVSNILR
FK506-binding protein 15	FKB15	Q5T1M5	FKBP15	S1162	nd		NaN	SsLSGDEEDELFK
Alpha-adducin	ADDA	P35611	ADD1	S358	1.6193	SPGsPVGEGTGSPPK	1.91957	SPGsPVGEGTGSPPK
Helicase MOV-10	MOV10	Q9HCE1	MOV10	S969	2.08907	LsPSTSGPHSHDYLPQER	0.809186	LsPSTSGPHSHDYLPQER
Microtubule-associated protein 1B	MAP1B	P46821	MAP1B	S1265	1.61904	SPSLSPSPPsPLEK	1.68657	SPSLSPSPPsPLEK
Nucleosome assembly protein 1-like 4	NP1L4	Q99733	NAP1L4	S125	NaN	EFITGDVEPTDAESEWHsENEEEEK	nd
Protein transport protein Sec61 subunit beta	SC61B	P60468	SEC61B	S17	nd		1.12848	PGPTPSGTNVGSSGRsPSKAVAAR; PGPTPSGTNVGSSGRsPSK
A-kinase anchor protein 2	AKAP2	Q9Y2D5	AKAP2	T399	1.28378	GQKSPGALEtPSAAGSQGNTASQGK	1.31781	GQKSPGALEtPSAAGSQGNTASQGK
Isoform 6 of Mitogen-activated protein kinase kinase kinase kinase 4	M4K4	O95819-6	MAP4K4	S947	0.921187	GSVVNVNPTNTRPQsDTPEIR	1.2757	GSVVNVNPTNTRPQsDTPEIR
BMP-2-inducible protein kinase	BMP2K	Q9NSY1	BMP2K	T829	1.19983	SGSGPtQDLNTILLTSAQLSSDVAVETPK	nd
Cytospin-A	CYTSA	Q69YQ0	SPECC1L	S868	nd		NaN	TPLsPSPMK
Drebrin	DREB	Q16643	DBN1	S337; T346	nd		1.63819	sPSDSSTAStPVAEQIER
Catenin delta-1	CTND1	O60716	CTNND1	S349	0.600983	GSLAsLDSLR	0.747704	GSLAsLDSLR; GSLAsLDSLRK
Serine/arginine repetitive matrix protein 1	SRRM1	Q8IYB3	SRRM1	S391; S393	1.0197	RLSPsAsPPR	1.40011	RLSPsAsPPR
Probable 28S rRNA (cytosine(4447)-C(5))-methyltransferase	NOP2	P46087	NOP2	S786	1.10114	GPQPPTVsPIR	1.33268	GPQPPTVsPIR
Eukaryotic translation initiation factor 2A	EIF2A	Q9BY44	EIF2A	S506	0.78001	SDKsPDLAPTPAPQSTPR	1.1757	SDKsPDLAPTPAPQSTPR
DnaJ homolog subfamily C member 5	DNJC5	Q9H3Z4	DNAJC5	S10	nd		1.01099	SLsTSGESLYHVLGLDK
Proline-, glutamic acid- and leucine-rich protein 1	PELP1	Q8IZL8	PELP1	T745	nd		1.03529	AGSNEDPILAPSGtPPPTIPPDETFGGR
Tight junction protein ZO-2	ZO2	Q9UDY2	TJP2	S986	NaN	DNsPPPAFKPEPPK	0.989642	DNsPPPAFKPEPPK
Myristoylated alanine-rich C-kinase substrate	MARCS	P29966	MARCKS	S101	1.55804	GEPAAAAAPEAGAsPVEK	2.01797	GEPAAAAAPEAGAsPVEK
Isoform 6 of Mitogen-activated protein kinase kinase kinase kinase 4	M4K4	O95819-6	MAP4K4	S685	1.26917	SEGsPSQR	nd
A-kinase anchor protein 12	AKA12	Q02952	AKAP12	S1391	0.962956	EVSsLEGSPPPCLGQEEAVCTK	nd
Serine/arginine repetitive matrix protein 2	SRRM2	Q9UQ35	SRRM2	T1208	nd		1.11607	DTLRtPPR
Ubiquitin-associated protein 2-like	UBP2L	Q14157	UBAP2L	S609	1.25273	YPSSISSsPQK; RYPSSISSsPQK	1.16972	YPSSISSsPQK; RYPSSISSsPQK
Cyclin-L1	CCNL1	Q9UK58	CCNL1	S352	nd		1.51837	AEEKsPISINVK
U4/U6.U5 tri-snRNP-associated protein 1	SNUT1	O43290	SART1	S598	nd		NaN	SANGGSEsDGEENIGWSTVNLDEEK
Filamin-A	FLNA	P21333	FLNA	S2338	nd		NaN	RLTVsSLQESGLK
ATPase WRNIP1	WRIP1	Q96S55	WRNIP1	S75	nd		1.58441	RLsESSALK
LIM domain only protein 7	LMO7	Q8WWI1	LMO7	S1510	2.07819	RGEsLDNLDSPR; GEsLDNLDSPR	2.33094	RGEsLDNLDSPR; GEsLDNLDSPR
Myosin phosphatase Rho-interacting protein	MPRIP	Q6WCQ1	MPRIP	S289; S292	nd		0.777426	AEEQQLPPPLsPPsPSTPNHR
Neuroblast differentiation-associated protein AHNAK	AHNK	Q09666	AHNAK	S5731	1.41126	GGVTGsPEASISGSK	1.53194	GGVTGsPEASISGSK
AP2-associated protein kinase 1	AAK1	Q2M2I8	AAK1	T620	NaN	VGSLtPPSSPK	NaN	VGSLtPPSSPK
Lamin-B1	LMNB1	P20700	LMNB1	S391	nd		1.34571	LKLsPSPSSR
LIM and calponin homology domains-containing protein 1	LIMC1	Q9UPQ0	LIMCH1	T302	nd		NaN	SWSTAtSPLGGERPFR
A-kinase anchor protein 12	AKA12	Q02952	AKAP12	S696	NaN	RGsSSDEEGGPK	nd
LIM domain only protein 7	LMO7	Q8WWI1	LMO7	T990; S991	1.26327	LPSPtsPFSSLSQDQAATSK	1.49847	LPSPtsPFSSLSQDQAATSK; EVAATEEDVTRLPSPtsPFSSLSQDQAATSK
Protein Smaug homolog 1	SMAG1	Q9UPU9	SAMD4A	S420	1.06962	AYSsPSTTPEAR	NaN	AYSsPSTTPEAR
Clathrin light chain A	CLCA	P09496	CLTA	S105	NaN	LQsEPESIR	nd
Serine/threonine-protein kinase PRP4 homolog	PRP4B	Q13523	PRPF4B	T847	0.785809	LCDFGSASHVADNDItPYLVSR	nd
PDZ and LIM domain protein 4	PDLI4	P50479	PDLIM4	T124	0.976373	RPSGTGtGPEDGRPSLGSPYGQPPR	NaN	RPSGTGtGPEDGRPSLGSPYGQPPR
Ribonuclease P protein subunit p30	RPP30	P78346	RPP30	S251	0.98115	KPRPsEGDEDCLPASK	nd
HIV Tat-specific factor 1	HTSF1	O43719	HTATSF1	S702	nd		NaN	LFEDDDsNEKLFDEEEDSSEK
Heterogeneous nuclear ribonucleoprotein K	HNRPK	P61978	HNRNPK	S216	1.06381	IILDLISEsPIK	1.15755	IILDLISEsPIK
Leucine-rich repeat flightless-interacting protein 2	LRRF2	Q9Y608	LRRFIP2	S314	0.89185	NSAsATTPLSGNSSR	nd
Membrane-associated progesterone receptor component 1	PGRC1	O00264	PGRMC1	S57	0.762031	GDQPAASGDsDDDEPPPLPR	1.19079	GDQPAASGDsDDDEPPPLPR
Spindlin interactor and repressor of chromatin-binding protein	SPNDC	Q9BUA3	SPINDOC	S251	NaN	NLDPDPEPPSPDsPTETFAAPAEVR	NaN	NLDPDPEPPSPDsPTETFAAPAEVR
Twinfilin-1	TWF1	Q12792	TWF1	S143	1.51826	YLLSQSsPAPLTAAEEELR	NaN	YLLSQSsPAPLTAAEEELR
AP-3 complex subunit delta-1	AP3D1	O14617	AP3D1	S829	nd		2.44565	NTETSKsPEKDVPMVEK
Phosphatidylinositol-binding clathrin assembly protein	PICAL	Q13492	PICALM	S16	4.42793	ITAAQHsVTGSAVSK	4.66579	ITAAQHsVTGSAVSK
Pleckstrin homology domain-containing family A member 6	PKHA6	Q9Y2H5	PLEKHA6	S777	NaN	TKsPTDDEVTPSAVVR	nd
Isoform 6 of Mitogen-activated protein kinase kinase kinase kinase 4	M4K4	O95819-6	MAP4K4	S326	NaN	DETEYEYSGsEEEEEEVPEQEGEPSSIVNVPGESTLR	NaN	DETEYEYSGsEEEEEEVPEQEGEPSSIVNVPGESTLR; RGEKDETEYEYSGsEEEEEEVPEQEGEPSSIVNVPGESTLR; GEKDETEYEYSGsEEEEEEVPEQEGEPSSIVNVPGESTLR
Rho GTPase-activating protein 22	RHG22	Q7Z5H3	ARHGAP22	S359	nd		3.58386	HSQLFTAPVPEGPTsPR
Zinc finger CCCH-type antiviral protein 1	ZCCHV	Q7Z2W4	ZC3HAV1	T273; S275	nd		0.616809	SCtPsPDQISHR
Ras GTPase-activating protein-binding protein 1	G3BP1	Q13283	G3BP1	S149	1.2576	YQDEVFGGFVTEPQEEsEEEVEEPEER	1.66981	YQDEVFGGFVTEPQEEsEEEVEEPEER
Serine/arginine repetitive matrix protein 2	SRRM2	Q9UQ35	SRRM2	T1003; S1014	nd		1.14525	AQtPPGPSLSGSKsPCPQEK
Angiomotin	AMOT	Q4VCS5	AMOT	T709	1.5589	DTtVISHSPNTSYDTALEAR	nd
Drebrin	DREB	Q16643	DBN1	S339; S341	0.779899	SPsDsSTASTPVAEQIER	nd
RNA-binding protein 10	RBM10	P98175	RBM10	S736	nd		1.2105	GLVAAYSGEsDSEEEQER
Catenin alpha-2	CTNA2	P26232	CTNNA2	S651; S654; T657	nd		3.43545	sRTsVQtEDDQLIAGQSAR
Protein PRRC2B	PRC2B	Q5JSZ5	PRRC2B	S388	NaN	LKFsDDEEEEEVVK	0.925515	LKFsDDEEEEEVVK
Microtubule-associated protein 1B	MAP1B	P46821	MAP1B	S2271	nd		NaN	SKPLAAsPKPAGLK
Unconventional myosin-XVIIIa	MY18A	Q92614	MYO18A	S2020	nd		NaN	SLAPDRsDDEHDPLDNTSRPR
Serrate RNA effector molecule homolog	SRRT	Q9BXP5	SRRT	S67	nd		1.28385	ERFsPPR
Isoform 6 of Mitogen-activated protein kinase kinase kinase kinase 4	M4K4	O95819-6	MAP4K4	T1264	NaN	SGGSSQVYFMtLGR	NaN	SGGSSQVYFMtLGR
TRAF2 and NCK-interacting protein kinase	TNIK	Q9UKE5	TNIK	S680	NaN	TTSIsPALAR	NaN	TTSIsPALAR
Ras GTPase-activating protein-binding protein 1	G3BP1	Q13283	G3BP1	S232	1.70885	SSsPAPADIAQTVQEDLR	1.63398	SSsPAPADIAQTVQEDLR
Alpha-adducin	ADDA	P35611	ADD1	S12	1.69664	AAVVTsPPPTTAPHK	2.16133	AAVVTsPPPTTAPHK
ATP-binding cassette sub-family A member 1	ABCA1	O95477	ABCA1	T1586	nd		21.1691	FMTGLDtK
Rho guanine nucleotide exchange factor 11	ARHGB	O15085	ARHGEF11	S1413	nd		NaN	sPPSLALR
E3 ubiquitin-protein ligase UBR4	UBR4	Q5T4S7	UBR4	S362	nd		NaN	TGsTSSKEDDYESDAATIVQK
LIM and calponin homology domains-containing protein 1	LIMC1	Q9UPQ0	LIMCH1	S973	1.10245	SINHQIEsPSER	1.41763	SINHQIEsPSER
Protein phosphatase 1B	PPM1B	O75688	PPM1B	S195	nd		NaN	VNGsLAVSR
Neuroblast differentiation-associated protein AHNAK	AHNK	Q09666	AHNAK	S5763	1.19496	ASLGSLEGEAEAEASsPK	1.44108	ASLGSLEGEAEAEASsPK
Protein IWS1 homolog	IWS1	Q96ST2	IWS1	S237	1.17264	HQASDsENEELPKPR	nd
Inactive tyrosine-protein kinase PEAK1	PEAK1	Q9H792	PEAK1	S281	NaN	ANTLsPVR	1.27794	ANTLsPVR
Nuclease-sensitive element-binding protein 1	YBOX1	P67809	YBX1	S174; S176	1.03276	NYQQNYQNSESGEKNEGsEsAPEGQAQQR	1.15818	NYQQNYQNSESGEKNEGsEsAPEGQAQQR
Serine/arginine repetitive matrix protein 2	SRRM2	Q9UQ35	SRRM2	T1003	0.831264	AQtPPGPSLSGSK	1.11671	AQtPPGPSLSGSK
Microtubule cross-linking factor 1	MTCL1	Q9Y4B5	MTCL1	S1514	0.900128	VLHsPPAVR	nd
Protein SREK1IP1	SR1IP	Q8N9Q2	SREK1IP1	T146	0.536279	HSStPNSSEFSR	nd
CTTNBP2 N-terminal-like protein	CT2NL	Q9P2B4	CTTNBP2NL	S560	4.96981	VSSPLsPLSPGIK	5.61968	VSSPLsPLSPGIK
Spectrin alpha chain, non-erythrocytic 1	SPTN1	Q13813	SPTAN1	S1031	NaN	LDPAQSAsRENLLEEQGSIALR	1.00133	LDPAQSAsRENLLEEQGSIALR
Voltage-dependent anion-selective channel protein 1	VDAC1	P21796	VDAC1	S104	0.365045	LTFDSSFsPNTGK	0.435689	LTFDSSFsPNTGKK; LTFDSSFsPNTGK
Serine/arginine repetitive matrix protein 2	SRRM2	Q9UQ35	SRRM2	S2046	nd		NaN	SRsPLAIR
BMP-2-inducible protein kinase	BMP2K	Q9NSY1	BMP2K	S839	nd		1.27037	SGSGPTQDLNTILLTsAQLSSDVAVETPK
Vimentin	VIME	P08670	VIM	S430	1.40832	ETNLDsLPLVDTHSK	1.0018	ETNLDsLPLVDTHSK
Putative RNA-binding protein 15B	RB15B	Q8NDT2	RBM15B	S552	nd		NaN	TFLEGDWTsPSK
LIM and calponin homology domains-containing protein 1	LIMC1	Q9UPQ0	LIMCH1	S217	NaN	QTPsPDVVLR	0.605267	QTPsPDVVLR
Calnexin	CALX	P27824	CANX	S583	1.19775	AEEDEILNRsPR	1.7452	AEEDEILNRsPR
Jupiter microtubule associated homolog 1	JUPI1	Q9UK76	JPT1	S87	1.40678	RNsSEASSGDFLDLK	1.28253	RNsSEASSGDFLDLK
Pericentriolar material 1 protein	PCM1	Q15154	PCM1	S65	0.749074	VTNDIsPESSPGVGR	1.01588	VTNDIsPESSPGVGR
Isoform 6 of Mitogen-activated protein kinase kinase kinase kinase 4	M4K4	O95819-6	MAP4K4	T798	0.788163	TMIVHDDVESEPAMtPSK	1.00327	TMIVHDDVESEPAMtPSK
[3-methyl-2-oxobutanoate dehydrogenase [lipoamide]] kinase, mitochondrial	BCKD	O14874	BCKDK	T32	nd		1.23481	StSATDTHHVEMAR
Microprocessor complex subunit DGCR8	DGCR8	Q8WYQ5	DGCR8	S377	nd		0.73883	EQSSDLTPSGDVsPVKPLSR
SRSF protein kinase 1	SRPK1	Q96SB4	SRPK1	S311	nd		0.832046	QEESEsPVERPLK
Isoform 2 of Zinc finger Ran-binding domain-containing protein 2	ZRAB2	O95218-2	ZRANB2	T303; S305; S307	0.964221	tRsRsPESQVIGENTK	1.03476	tRsRsPESQVIGENTK
Transforming growth factor beta-1-induced transcript 1 protein	TGFI1	O43294	TGFB1I1	S140; S141	nd		0.649639	KRPSLPssPSPGLPK
Clathrin heavy chain 1	CLH1	Q00610	CLTC	T394	1.73964	GILRtPDTIR	NaN	GILRtPDTIR
Voltage-dependent anion-selective channel protein 2	VDAC2	P45880	VDAC2	S115	0.313883	LTFDTTFsPNTGK	NaN	LTFDTTFsPNTGK
Microtubule-associated protein 1B	MAP1B	P46821	MAP1B	T1788	NaN	SDISPLtPR	1.27301	SDISPLtPR
Protein furry homolog-like	FRYL	O94915	FRYL	S2333	nd		3.48106	STSsTSSGSNSNALVPVSWK
Myristoylated alanine-rich C-kinase substrate	MARCS	P29966	MARCKS	S170	nd		NaN	LSGFsFKK
Leucine-rich repeat flightless-interacting protein 2	LRRF2	Q9Y608	LRRFIP2	S320	0.89185	NSASATTPLsGNSSR	0.985225	NSASATTPLsGNSSR
Lamina-associated polypeptide 2, isoforms beta/gamma	LAP2B	P42167	TMPO	T74	nd		2.17035	GPPDFSSDEEREPtPVLGSGAAAAGR
Serine/arginine repetitive matrix protein 2	SRRM2	Q9UQ35	SRRM2	S2694	0.868635	SLSYsPVER	0.682803	SLSYsPVER
Signal-induced proliferation-associated protein 1	SIPA1	Q96FS4	SIPA1	S839	1.41098	TEFLHSQNSLsPR	1.51532	TEFLHSQNSLsPR
DNA ligase 3	DNLI3	P49916	LIG3	S210	1.07007	LTTTGQVTsPVK	0.865689	LTTTGQVTsPVK
Serine/arginine-rich splicing factor 6	SRSF6	Q13247	SRSF6	S272	NaN	SKDEYEKsR	nd
Rho GTPase-activating protein 29	RHG29	Q52LW3	ARHGAP29	S357	1.00392	AEEEHLSSsGGLAK	0.939028	AEEEHLSSsGGLAK
Microfibrillar-associated protein 1	MFAP1	P55081	MFAP1	T267	nd		1.86932	SLAALDALNtDDENDEEEYEAWK
LIM domain and actin-binding protein 1	LIMA1	Q9UHB6	LIMA1	S609	0.579487	TVsPPIRK; TVsPPIR	0.634824	TVsPPIRK; TVsPPIR
LIM domain and actin-binding protein 1	LIMA1	Q9UHB6	LIMA1	T487	nd		0.633839	EtPHSPGVEDAPIAK
Helicase SKI2W	SKIV2	Q15477	SKIV2L	S256	1.35351	ASsLEDLVLK	1.24063	ASsLEDLVLK
Angiomotin-like protein 1	AMOL1	Q8IY63	AMOTL1	S720	0.520327	DTTIINHsR	NaN	DTTIINHsR
High mobility group protein HMG-I/HMG-Y	HMGA1	P17096	HMGA1	S36	0.500114	KQPPVsPGTALVGSQK	NaN	KQPPVsPGTALVGSQK
LIM domain only protein 7	LMO7	Q8WWI1	LMO7	T1425	nd		1.59716	SRSTtELDDYSTNK
Uncharacterized protein KIAA0754	K0754	O94854	KIAA0754	S43	nd		1.50563	ESSSALTESsGHLDHR
Filamin-C	FLNC	Q14315	FLNC	S2233	1.16318	LGsFGSITR	0.777627	LGsFGSITR
Serine/arginine repetitive matrix protein 2	SRRM2	Q9UQ35	SRRM2	S2100; S2102; T2104	nd		1.05304	NHsGsRtPPVALNSSR
Microtubule-associated protein 1B	MAP1B	P46821	MAP1B	S1797	nd		1.27969	ESSPLYsPTFSDSTSAVK
Actin filament-associated protein 1	AFAP1	Q8N556	AFAP1	S265	1.03015	EAYSGCSGPVDSECPPPPSsPVHK	1.99199	EAYSGCSGPVDSECPPPPSsPVHK
Rho GTPase-activating protein 22	RHG22	Q7Z5H3	ARHGAP22	S587	NaN	SLDLDHSMDEAGAGASNSEPSEPDsPTR	nd
Splicing factor 3B subunit 2	SF3B2	Q13435	SF3B2	S431; S435; S436	nd		1.33297	GFEEEHKDsDDDssDDEQEKKPEAPK
LIM domain only protein 7	LMO7	Q8WWI1	LMO7	S991; S994	1.27755	LPSPTsPFsSLSQDQAATSK	1.49507	LPSPTsPFsSLSQDQAATSK
Cyclin-Y-like protein 1	CCYL1	Q8N7R7	CCNYL1	S344	1.29624	SFsADNFIGIQR	1.42938	SFsADNFIGIQR
Protein phosphatase 1 regulatory subunit 12A	MYPT1	O14974	PPP1R12A	S299	nd		1.43893	DKKsPLIESTANMDNNQSQK
Stathmin	STMN1	P16949	STMN1	S38	1.32337	ESVPEFPLsPPK	1.22601	SKESVPEFPLsPPK; ESVPEFPLsPPK
Zinc finger protein 185	ZN185	O15231	ZNF185	S465	1.14392	REsCGSSVLTDFEGK	1.30844	REsCGSSVLTDFEGK
Protein phosphatase 1 regulatory subunit 12A	MYPT1	O14974	PPP1R12A	S409	nd		NaN	TKPLASVTNANTSSTQAAPVAVTTPTVSSGQATPTsPIKK
Uncharacterized protein C18orf25	CR025	Q96B23	C18orf25	S69	nd		1.82918	RDSSEsQLASTESDKPTTGR
Nuclease-sensitive element-binding protein 1	YBOX1	P67809	YBX1	S165	0.97528	NYQQNYQNsESGEKNEGSESAPEGQAQQR; NYQQNYQNsESGEK	0.976608	NYQQNYQNsESGEKNEGSESAPEGQAQQR; NYQQNYQNsESGEK
E3 ubiquitin-protein ligase CHIP	CHIP	Q9UNE7	STUB1	S19; S23	nd		1.28516	LGAGGGsPEKsPSAQELK
Cytoplasmic dynein 1 heavy chain 1	DYHC1	Q14204	DYNC1H1	S4368	NaN	TDsTSDGRPAWMR	1.44195	TDsTSDGRPAWMR
Regulator of microtubule dynamics protein 3	RMD3	Q96TC7	RMDN3	S46	NaN	SQsLPNSLDYTQTSDPGR	0.20207	SQsLPNSLDYTQTSDPGR
Heterogeneous nuclear ribonucleoprotein H	HNRH1	P31943	HNRNPH1	S104	0.992848	HTGPNsPDTANDGFVR	1.10986	HTGPNsPDTANDGFVR
Elongation factor 1-delta	EF1D	P29692	EEF1D	S133	1.17251	ATAPQTQHVsPMR	1.04086	ATAPQTQHVsPMR
Putative RNA-binding protein 15B	RB15B	Q8NDT2	RBM15B	T532	0.664277	DRtPPHLLYSDR	0.784621	DRtPPHLLYSDR
182 kDa tankyrase-1-binding protein	TB182	Q9C0C2	TNKS1BP1	T239	2.34518	EEHSKtPEER	nd
Zinc finger CCCH domain-containing protein 13	ZC3HD	Q5T200	ZC3H13	S879	0.65211	SLSPsHLTEDR	nd
Heat shock protein beta-1	HSPB1	P04792	HSPB1	S82	NaN	QLsSGVSEIR	1.79469	QLsSGVSEIR
Gamma-adducin	ADDG	Q9UEY8	ADD3	S681	1.66251	IEEVLSPEGSPSKsPSK	1.96398	IEEVLSPEGSPSKsPSK; IEEVLSPEGSPSKsPSKK
Vimentin	VIME	P08670	VIM	S22	nd		1.74156	MFGGPGTAsRPSSSR
Ragulator complex protein LAMTOR1	LTOR1	Q6IAA8	LAMTOR1	S27	nd		2.3477	LLLDPSsPPTK
Heterogeneous nuclear ribonucleoprotein U-like protein 1	HNRL1	Q9BUJ2	HNRNPUL1	S194	nd		NaN	GRsPQPPAEEDEDDFDDTLVAIDTYNCDLHFK
Unconventional myosin-Va	MYO5A	Q9Y4I1	MYO5A	S1652	0.502323	TSsIADEGTYTLDSILR	nd
Microtubule-associated protein 1B	MAP1B	P46821	MAP1B	S1915	1.98955	sPSDSGYSYETIGK	1.65828	sPSDSGYSYETIGK
Nucleolin	NUCL	P19338	NCL	S619	0.945023	GFGFVDFNsEEDAK	0.579781	GFGFVDFNsEEDAK
Serine/arginine repetitive matrix protein 2	SRRM2	Q9UQ35	SRRM2	S1320	0.842456	ELSNsPLR	1.05992	ELSNsPLR
Putative annexin A2-like protein	AXA2L	A6NMY6	ANXA2P2	T19	0.90838	LSLEGDHStPPSAYGSVK	1.19889	LSLEGDHStPPSAYGSVK
Filamin-B	FLNB	O75369	FLNB	S2107	nd		0.87742	APsVATVGSICDLNLK
Formin-binding protein 4	FNBP4	Q8N3X1	FNBP4	S116	nd		1.96735	ATGGLCLLGAYADsDDDDNDVSEK
CTTNBP2 N-terminal-like protein	CT2NL	Q9P2B4	CTTNBP2NL	S563	nd		5.61968	VSSPLSPLsPGIK
Drebrin	DREB	Q16643	DBN1	S339	1.09907	SPsDSSTASTPVAEQIER; MAPTPIPTRSPsDSSTASTPVAEQIER	1.42922	SPsDSSTASTPVAEQIER; MAPTPIPTRSPsDSSTASTPVAEQIER
Cytoplasmic dynein 1 light intermediate chain 1	DC1L1	Q9Y6G9	DYNC1LI1	S516	NaN	KPVTVSPTTPTsPTEGEAS	2.56293	KPVTVSPTTPTsPTEGEAS
Synaptopodin	SYNPO	Q8N3V7	SYNPO	S580	nd		1.56479	sPPSYSVLYPSSDPK
BET1 homolog	BET1	O15155	BET1	S50	nd		NaN	SLsIEIGHEVK
Pyruvate dehydrogenase E1 component subunit alpha, testis-specific form, mitochondrial	ODPAT	P29803	PDHA2	S293	nd		2.39789	YHGHSMsDPGVSYR
Ubiquitin-associated protein 2-like	UBP2L	Q14157	UBAP2L	S471	1.16823	STSAPQMSPGSsDNQSSSPQPAQQK	nd
Protein PRRC2B	PRC2B	Q5JSZ5	PRRC2B	S556	nd		NaN	EVPWsPSAEK
Actin-binding LIM protein 3	ABLM3	O94929	ABLIM3	S503	nd		1.37745	RFsSGGEEDDFDR
Myosin light chain kinase, smooth muscle	MYLK	Q15746	MYLK	T1778	1.54474	SSTGSPtSPLNAEK	nd
Tight junction protein ZO-1	ZO1	Q07157	TJP1	S622	1.45472	SREDLsAQPVQTK	NaN	SREDLsAQPVQTK
Cyclin-Y-like protein 1	CCYL1	Q8N7R7	CCNYL1	S122	nd		0.994025	YSsCSTIFLDDSTVSQPNLR
Prelamin-A/C	LMNA	P02545	LMNA	S22	0.575793	SGAQASSTPLsPTR	0.767202	SGAQASSTPLsPTR
Semaphorin-4B	SEM4B	Q9NPR2	SEMA4B	S791	nd		NaN	GYQSLsDSPPGSR
ARF GTPase-activating protein GIT1	GIT1	Q9Y2X7	GIT1	S592	nd		NaN	HGsGADSDYENTQSGDPLLGLEGK
Ankycorbin	RAI14	Q9P0K7	RAI14	S412	NaN	SsPSVLIHSLGK	0.79511	SsPSVLIHSLGK
Myosin light chain kinase, smooth muscle	MYLK	Q15746	MYLK	S305	0.803272	GGsPPWAANSQPQPPR	1.55421	GGsPPWAANSQPQPPR
Microtubule-associated protein 4	MAP4	P27816	MAP4	S827	NaN	SPsTLLPK	nd
Serine/arginine repetitive matrix protein 2	SRRM2	Q9UQ35	SRRM2	S952	nd		1.00968	sVSPCSNVESR
LIM domain and actin-binding protein 1	LIMA1	Q9UHB6	LIMA1	S228	0.635369	KISENsYSLDDLEIGPGQLSSSTFDSEK	NaN	KISENsYSLDDLEIGPGQLSSSTFDSEK
Tyrosine-protein phosphatase non-receptor type 14	PTN14	Q15678	PTPN14	S314	0.890802	ICTEQSNsPPPIR	1.14418	ICTEQSNsPPPIR
Niban-like protein 1	NIBL1	Q96TA1	FAM129B	S692	nd		1.53917	AAPEASsPPASPLQHLLPGK
60S acidic ribosomal protein P1	RLA1	P05386	RPLP1	S101; S104	1.1266	KEEsEEsDDDMGFGLFD	1.1209	KEEsEEsDDDMGFGLFD
Serine/arginine repetitive matrix protein 1	SRRM1	Q8IYB3	SRRM1	S797	NaN	SPTPSPsPPR	nd
182 kDa tankyrase-1-binding protein	TB182	Q9C0C2	TNKS1BP1	T501; S504	NaN	LDSPPPSPItEAsEAAEAAEAGNLAVSSR	nd
GRB10-interacting GYF protein 2	GGYF2	Q6Y7W6	GIGYF2	S236	0.789901	WRPHsPDGPR	0.935719	WRPHsPDGPR
26S proteasome non-ATPase regulatory subunit 2	PSMD2	Q13200	PSMD2	S16	1.20571	DKAPVQPQQsPAAAPGGTDEKPSGK	1.494	APVQPQQsPAAAPGGTDEKPSGK; DKAPVQPQQsPAAAPGGTDEKPSGK
Corepressor interacting with RBPJ 1	CIR1	Q86X95	CIR1	S202	nd		NaN	NLTANDPSQEYVAsEGEEDPEVEFLK
LIM and calponin homology domains-containing protein 1	LIMC1	Q9UPQ0	LIMCH1	S225	nd		1.28682	GsSDGRGSDSESDLPHR
Leucine-rich repeat flightless-interacting protein 2	LRRF2	Q9Y608	LRRFIP2	S328	1.00861	GsGDTSSLIDPDTSLSELR; RGsGDTSSLIDPDTSLSELR	1.06059	RGsGDTSSLIDPDTSLSELR
Isoform 5 of Zinc finger protein 185	ZN185	O15231-5	ZNF185	S43	0.888319	SsPTQETQAPFIAK	1.34728	SsPTQETQAPFIAK
Microtubule-associated protein 1B	MAP1B	P46821	MAP1B	S1793; S1797	2.52784	ESsPLYsPTFSDSTSAVK	1.76024	ESsPLYsPTFSDSTSAVK
Serine/arginine repetitive matrix protein 2	SRRM2	Q9UQ35	SRRM2	S2398	0.918005	TsPPLLDR	0.978245	TsPPLLDR
Zyxin	ZYX	Q15942	ZYX	S267	NaN	FsPVTPK	NaN	FsPVTPK
Nucleophosmin	NPM	P06748	NPM1	S70	1.25348	DELHIVEAEAMNYEGsPIK	1.73496	DELHIVEAEAMNYEGsPIK
Membrane-associated progesterone receptor component 2	PGRC2	O15173	PGRMC2	T211	nd		1.74838	LLKPGEEPSEYtDEEDTKDHNKQD; LLKPGEEPSEYtDEEDTK; LLKPGEEPSEYtDEEDTKDHNK
Dihydropyrimidinase-related protein 3	DPYL3	Q14195	DPYSL3	S522	1.307	GsPTRPNPPVR	1.59706	GsPTRPNPPVR
RNA-binding protein 6	RBM6	P78332	RBM6	S1025	nd		NaN	LQSFDsPER
Isoform 6 of Mitogen-activated protein kinase kinase kinase kinase 4	M4K4	O95819-6	MAP4K4	T597; S600	0.712419	TtSRsPVLSR	0.523868	TtSRsPVLSR
Protein kinase C and casein kinase substrate in neurons protein 3	PACN3	Q9UKS6	PACSIN3	S319	nd		NaN	GGRsPDEVTLTSIVPTR
26S proteasome non-ATPase regulatory subunit 1	PSMD1	Q99460	PSMD1	T273	nd		NaN	TVGtPIASVPGSTNTGTVPGSEK
182 kDa tankyrase-1-binding protein	TB182	Q9C0C2	TNKS1BP1	S893	1.34209	RDsLGAYASQDANEQGQDLGK	1.51397	RDsLGAYASQDANEQGQDLGK
RalBP1-associated Eps domain-containing protein 1	REPS1	Q96D71	REPS1	S272; S273	NaN	RQssSYDDPWK	nd
MICOS complex subunit MIC19	MIC19	Q9NX63	CHCHD3	S50	NaN	YsGAYGASVSDEELK	0.284369	YsGAYGASVSDEELK
Proliferation marker protein Ki-67	KI67	P46013	MKI67	S1131	nd		NaN	IACKsPPPESVDTPTSTK
Microtubule-associated protein 1B	MAP1B	P46821	MAP1B	S1965	1.56979	TTsPPEVSGYSYEK	1.4007	TTsPPEVSGYSYEK
Signal-induced proliferation-associated 1-like protein 1	SI1L1	O43166	SIPA1L1	S1588	nd		NaN	TLSDEsIYNSQR
Disintegrin and metalloproteinase domain-containing protein 9	ADAM9	Q13443	ADAM9	T761	nd		1.94295	HVSPVtPPR
CLIP-associating protein 1	CLAP1	Q7Z460	CLASP1	S600	nd		1.87365	SRsDIDVNAAASAK
Microtubule-associated protein 1B	MAP1B	P46821	MAP1B	S1396; S1400	nd		1.59381	VLsPLRsPPLIGSESAYESFLSADDK
Isoform 6 of Mitogen-activated protein kinase kinase kinase kinase 4	M4K4	O95819-6	MAP4K4	S934	0.612044	KGsVVNVNPTNTRPQSDTPEIR	0.767487	KGsVVNVNPTNTRPQSDTPEIR
Calponin-2	CNN2	Q99439	CNN2	T158	NaN	NFDDAtMK	nd
Vinculin	VINC	P18206	VCL	S290	nd		NaN	DPSAsPGDAGEQAIR
Fragile X mental retardation syndrome-related protein 2	FXR2	P51116	FXR2	S603	nd		0.633533	TDGSIsGDRQPVTVADYISR
Niban-like protein 1	NIBL1	Q96TA1	FAM129B	S691; S696	1.34566	AAPEAsSPPAsPLQHLLPGK	nd
Microtubule-associated protein 1B	MAP1B	P46821	MAP1B	T1503	2.12755	KLGDVSPtQIDVSQFGSFK	1.53292	KLGDVSPtQIDVSQFGSFK; LGDVSPtQIDVSQFGSFK
Serine/arginine repetitive matrix protein 1	SRRM1	Q8IYB3	SRRM1	S696	0.82029	APQTSSsPPPVR	1.14908	APQTSSsPPPVR
Disabled homolog 2	DAB2	P98082	DAB2	S401	1.28758	SSPNPFVGsPPK	1.58661	SSPNPFVGsPPK
Isoform 5 of Peripheral plasma membrane protein CASK	CSKP	O14936-5	CASK	S191	1.25862	TQSsSCEDLPSTTQPK	0.771708	TQSsSCEDLPSTTQPK
Insulin-like growth factor 2 mRNA-binding protein 2	IF2B2	Q9Y6M1	IGF2BP2	S162	1.06598	ISYIPDEEVSsPSPPQR	1.02385	ISYIPDEEVSsPSPPQR
Serine/arginine repetitive matrix protein 1	SRRM1	Q8IYB3	SRRM1	S616	nd		1.17935	TAsPPPPPK
Filamin-A	FLNA	P21333	FLNA	S972	nd		NaN	SPFSVAVSPSLDLsK
Supervillin	SVIL	O95425	SVIL	S1120	0.783762	TPTGEGLLDsPSK	NaN	TPTGEGLLDsPSK
Spectrin beta chain, non-erythrocytic 1	SPTB2	Q01082	SPTBN1	S2138	0.773227	GEQVSQNGLPAEQGsPR	0.733179	GEQVSQNGLPAEQGsPR; VSEEAESQQQWDTSKGEQVSQNGLPAEQGsPR
Filamin-A	FLNA	P21333	FLNA	S2180	nd		3.02551	IPEISIQDMTAQVTsPSGK
