# Supplementary material for: STRIPAK directs PP2A activity toward MAP4K4 to promote oncogenic transformation of human cells
Source: eLife. 2020 Jan 8;9:e53003. doi: 10.7554/eLife.53003 (PMC6984821; doi:10.7554/eLife.53003)
Supplement: Supplementary file 5. [file elife-53003-supp5.xlsx]

## Sheet: S5
Supplementary file 5. Results of MudPIT experiment showing STRN4 interacting proteins.
Description	Gene	STRN4-IP_GFP dNSAF	STRN4-IP_SV40-ST dNSAF	IgG-Control dNSAF
small t antigen [Macaca mulatta polyomavirus 1]	ST	X	0.00159914	X
serine/threonine-protein phosphatase 2A catalytic subunit beta isoform [Homo sapiens]	PPP2CB	0.00475693	X	X
striatin-4 isoform 2 [Homo sapiens]	STRN4	0.0313139	0.0277211	X
striatin [Homo sapiens]	STRN/STRN1	0.0344222	0.0393035	X
MOB-like protein phocein isoform 1 [Homo sapiens]	MOB4	0.0451511	0.0355541	X
serine/threonine-protein phosphatase 2A 65 kDa regulatory subunit A alpha isoform isoform 1 [Homo sapiens]	PPP2R1A	0.0272933	0.0197231	X
striatin-3 isoform 1 [Homo sapiens]	STRN3	0.0238637	0.0189446	X
striatin-interacting protein 1 isoform 1 [Homo sapiens]	STRIP1	0.0197744	0.0186676	X
serine/threonine-protein phosphatase 2A catalytic subunit alpha isoform isoform 1 [Homo sapiens]	PPP2CA	0.00951386	0.0144077	X
CTTNBP2 N-terminal-like protein [Homo sapiens]	CTTNBP2NL	0.00908473	0.0130634	X
FGFR1 oncogene partner 2 isoform 1 [Homo sapiens]	FGFR1OP2	0.0108843	0.00943423	X
dynein light chain 1, cytoplasmic [Homo sapiens]	DYNLL1	0.00815329	0.0106956	X
suppressor of IKBKE 1 isoform 2 [Homo sapiens]	SIKE1	0.00668745	0.0117618	X
FGFR1 oncogene partner 2 isoform 2 [Homo sapiens]	FGFR1OP2	0.006404	0.00863463	X
striatin-3 isoform 2 [Homo sapiens]	STRN3	0.00508097	0.00920718	X
sarcolemmal membrane-associated protein isoform b [Homo sapiens]	SLMAP	0.00533409	0.0081199	X
programmed cell death protein 10 [Homo sapiens]	PDCD10/CCM3	0.00526591	0.00459374	X
striatin-interacting protein 2 isoform a [Homo sapiens]	STRIP2	0.00391418	0.00562043	X
sarcolemmal membrane-associated protein isoform a [Homo sapiens]	SLMAP	0.00522457	0.00397659	X
serine/threonine-protein kinase 24 isoform b precursor [Homo sapiens]	STK24/GCKII	0.00289968	0.00188297	X
mitogen-activated protein kinase kinase kinase kinase 4 isoform 2 [Homo sapiens]	MAP4K4	0.00135117	0.00194964	X
cortactin-binding protein 2 isoform 2 [Homo sapiens]	CTTNBP2	0.00078044	0.00080346	X
misshapen-like kinase 1 isoform 4 [Homo sapiens]	MINK1	5.042e-05	7.006e-05	X
serum response factor isoform 1 [Homo sapiens]	SRF	0.0026371	0.00424495	X
dynein light chain 2, cytoplasmic [Homo sapiens]	DYNLL2	0.00188153	0.00493642	X
ankyrin repeat and BTB/POZ domain-containing protein BTBD11 isoform a [Homo sapiens]	BTBD11	0.00176961	0.00315047	X
kelch-like protein 29 [Homo sapiens]	KLHL29	0.00184999	0.00302099	X
ATPase family AAA domain-containing protein 3B isoform AAA-TOB3l [Homo sapiens]	ATAD3B	0.00152591	0.00267181	X
T-complex protein 1 subunit theta isoform 1 [Homo sapiens]	CCT8	0.00193532	0.00215796	X
GTP-binding nuclear protein Ran isoform 2 [Homo sapiens]	RAN	0.0026165	0.00108691	X
reticulocalbin-2 isoform b precursor [Homo sapiens]	RCN2	0.00233272	0.00103824	X
fructose-bisphosphate aldolase A isoform 2 [Homo sapiens]	ALDOA	0.00103015	0.00232984	X
ATP synthase subunit f, mitochondrial isoform 2b [Homo sapiens]	ATP5J2	0.00190291	0.00079048	X
U6 snRNA-associated Sm-like protein LSm2 [Homo sapiens]	LSM2	0.00058756	0.00146447	X
actin-related protein 2/3 complex subunit 4 isoform c [Homo sapiens]	ARPC4	0.00059699	0.00111597	X
glutamate dehydrogenase 1, mitochondrial isoform b [Homo sapiens]	GLUD1	0.00118204	0.00049103	X
glucose-induced degradation protein 8 homolog [Homo sapiens]	GID8	0.00097927	0.0006102	X
acyl-coenzyme A thioesterase 13 isoform 2 [Homo sapiens]	ACOT13	0.00095417	0.00059455	X
ras-related protein R-Ras2 isoform c [Homo sapiens]	RRAS2	0.00066058	0.00082322	X
serine/threonine-protein kinase 26 isoform 3 [Homo sapiens]	STK26	0.00066782	0.00065501	X
ATP synthase subunit d, mitochondrial isoform b [Homo sapiens]	ATP5H	0.00081487	0.00050775	X
protein lin-7 homolog C [Homo sapiens]	LIN7C	0.00056669	0.00070622	X
poly(rC)-binding protein 2 isoform c [Homo sapiens]	PCBP2	0.00084318	0.00042032	X
T-complex protein 1 subunit zeta isoform a [Homo sapiens]	CCT6A	0.00084096	0.00039301	X
phosphoglycerate mutase 1 isoform 1 [Homo sapiens]	PGAM1	0.00087903	0.00027387	X
transketolase isoform 1 [Homo sapiens]	TKT	0.00080637	0.00033497	X
endonuclease domain-containing 1 protein precursor [Homo sapiens]	ENDOD1	0.00066982	0.00041737	X
clathrin heavy chain 1 isoform 2 [Homo sapiens]	CLTC	0.00059841	0.00045574	X
T-complex protein 1 subunit epsilon isoform b [Homo sapiens]	CCT5	0.00064406	0.00040132	X
ADP-ribosylation factor 4 [Homo sapiens]	ARF4	0.00046516	0.00054104	X
zinc-alpha-2-glycoprotein precursor [Homo sapiens]	AZGP1	0.00074924	0.00023343	X
14-3-3 protein zeta/delta [Homo sapiens]	YWHAZ	0.00068349	0.00028393	X
ran-binding protein 9 [Homo sapiens]	RANBP9	0.00038284	0.00057253	X
mitochondrial 2-oxoglutarate/malate carrier protein isoform 2 [Homo sapiens]	SLC25A11	0.00036844	0.00045916	X
coatomer subunit epsilon isoform d [Homo sapiens]	COPE	0.00016864	0.00063047	X
glucose-6-phosphate isomerase isoform 2 [Homo sapiens]	GPI	0.00040013	0.00037399	X
dynactin subunit 2 isoform 2 [Homo sapiens]	DCTN2	0.00041552	0.00034522	X
multifunctional protein ADE2 isoform 2 [Homo sapiens]	PAICS	0.00039401	0.00032735	X
galectin-3-binding protein precursor [Homo sapiens]	LGALS3BP	0.00047708	0.00023782	X
citrate synthase, mitochondrial precursor [Homo sapiens]	CS	0.00035935	0.00029855	X
septin-7 isoform 2 [Homo sapiens]	SEP7	0.00012802	0.00047864	X
DNA replication licensing factor MCM7 isoform 2 [Homo sapiens]	MCM7	0.00030839	0.00025622	X
proteasome subunit alpha type-3 isoform 1 [Homo sapiens]	PSMA3	0.0002189	0.00027279	X
alpha-centractin [Homo sapiens]	ACTR1A	0.00029691	0.00018501	X
signal recognition particle receptor subunit beta [Homo sapiens]	SRPRB	0.00020597	0.00025669	X
prohibitin isoform 1 [Homo sapiens]	PHB	0.00020522	0.00025574	X
asparagine--tRNA ligase, cytoplasmic [Homo sapiens]	NARS	0.00020372	0.00025388	X
X-ray repair cross-complementing protein 6 isoform 2 [Homo sapiens]	XRCC6	0.00019654	0.00024494	X
ras GTPase-activating protein-binding protein 1 [Homo sapiens]	G3BP1	0.00023957	0.00014928	X
LIM and senescent cell antigen-like-containing domain protein 1 isoform c [Homo sapiens]	LIMS1	0.00016966	0.00021144	X
coatomer subunit beta' [Homo sapiens]	COPB2	0.00018483	0.00015356	X
paraspeckle component 1 isoform 2 [Homo sapiens]	PSPC1	0.00013386	0.00016682	X
WD repeat-containing protein 26 isoform b [Homo sapiens]	WDR26	0.00017308	0.00010785	X
SH3 domain-binding protein 4 [Homo sapiens]	SH3BP4	0.00011593	0.00014447	X
