# Supplementary material for: STRIPAK directs PP2A activity toward MAP4K4 to promote oncogenic transformation of human cells
Source: eLife. 2020 Jan 8;9:e53003. doi: 10.7554/eLife.53003 (PMC6984821; doi:10.7554/eLife.53003)
Supplement: Supplementary file 6. [file elife-53003-supp6.xlsx]

## Sheet: S6
Supplementary file 6. RNAseq (TPM) profiles of MAP4K4 knockdown (shMAP4K4-82).
Gene_Symbol	shLuc-1	shLuc-2	shLuc-3	shMAP4K4-1	shMAP4K4-2	shMAP4K4-3
A1BG	0.676058	1.58187	1.23362	0.366378	0.0686474	1.24159
A1CF	0	0	0.015712	0	0.0149853	0
A2M	0	0	0	0.616625	0	0.0313282
A2ML1	0	0	0	0.0427515	0	0
A2MP1	0	0	0	0	0	0
A3GALT2	0	0	0	0	0	0
A4GALT	3.42493	3.1671	3.25472	2.98022	3.21162	3.26726
A4GNT	0	0	0	0	0	0
AAAS	1.01384	2.00571	1.2778	1.27297	1.17684	1.83846
AACS	2.5748	1.98896	3.25787	2.46679	3.30466	2.86518
AACSP1	0	0	0	0	0	0
AADAC	0	0	0	0	0	0
AADACL2	0	0	0	0	0	0
AADACL3	0	0	0	0	0	0.0399154
AADACL4	0	0	0	0	0	0
AADACP1	0	0	0.125854	0	0.231324	0
AADAT	0.886516	0.521346	2.42343	1.36848	1.95221	1.57124
AAED1	1.82716	1.69095	1.60368	1.14796	1.03653	1.55304
AAGAB	2.77558	1.39011	2.55222	2.45671	1.90819	1.92659
AAK1	1.41655	1.88013	1.81461	1.98943	1.8465	1.7335
AAMDC	0.78742	0.811721	2.7089	0.610918	3.28229	2.92528
AAMP	4.18385	4.277	4.06144	4.38714	4.37254	4.32279
AANAT	0.235165	0	0	0	0	0
AAR2	3.48792	3.05507	3.4765	3.73781	3.72226	3.7116
AARD	0	0.186722	0	0	0.122125	0
AARS	2.82045	3.7699	3.86809	2.88712	3.82919	2.9896
AARS2	0.365092	1.52971	0.211428	0.450301	0.439476	1.88474
AARSD1	0.822824	0.936744	0.506502	1.03083	0.661167	1.06078
AARSP1	0	0	0	0	0	0
AASDH	0.241791	0.482897	0.478541	1.36916	0.725934	0.997166
AASDHPPT	3.48019	3.05606	2.66641	2.7314	3.797	2.15774
AASS	0.757389	1.82248	1.11216	0.185065	1.47584	2.23403
AATF	1.70775	2.04718	1.54942	1.73293	1.67726	2.11523
AATK	0	0	0	0.218137	0	0
AATK-AS1	0	0	0	0	0	0
ABAT	0.0991718	0.399011	1.13152	0.079299	0.151247	0.0618083
ABBA01000935.1	0	0.499737	0	0	0	0
ABBA01000935.2	0	0.499737	0	0	0	0
ABBA01006766.1	0	0	0	0	0	0
ABBA01006766.2	0	0	0	0	0	0
ABBA01031660.1	0	0	0	0	0	0
ABBA01031661.1	0	0	0	0	0	0
ABBA01031663.1	0	0	0	0.206588	0	0
ABBA01031674.1	0.260583	0.435007	0.738317	0.227388	1.19668	0.754162
ABBA01040607.1	0	0	0	0	0	0
ABCA1	0.816046	1.0439	2.02647	0.770529	0.582186	2.00268
ABCA10	0.14029	0.0791073	0.0301691	0.0264563	0	0.139424
ABCA11P	0.53412	0.386265	0.39143	0	1.27434	0.12928
ABCA12	0.379517	0.0466677	0.173189	0	0.0594131	0.139114
ABCA13	0.0446818	0.269213	0.0957301	0.0335882	0.916707	0.0207273
ABCA17P	0	0	0.417502	0	0	0
ABCA2	2.6567	4.16258	2.30955	2.72277	3.58208	1.11217
ABCA3	0	0.188024	0.0407463	0	0	0.0903707
ABCA4	0.0657634	0.222364	0.159241	0.0569457	0.501536	0
ABCA5	0	0.812178	0.507699	0.245896	0.485561	0.556958
ABCA6	0	0.10419	0.0704082	0	0	0.072422
ABCA7	1.33753	0	0.61197	0.44096	0.521976	0.0479734
ABCA8	0	0	0	0	0	0
ABCA9	0.0273968	0.269874	0	0.0503478	0.367636	0.368048
ABCB1	1.11541	2.13872	2.1777	2.18925	2.73205	3.07959
ABCB10	1.45911	2.36541	2.29255	2.30432	1.49254	2.56273
ABCB10P1	2.55e-08	0	0	0	1.79e-08	0
ABCB10P3	0.00301953	0	0	0	0.00245813	0
ABCB10P4	0	0	0	0	0	0
ABCB11	0	0	0	0	0	0
ABCB4	2.5	2.19224	1.31914	2.25841	2.38045	2.23589
ABCB5	0	0.0675315	0	0.184277	0	0.173014
ABCB6	0	0.367925	1.01698	0.123635	0.371413	0
ABCB7	2.33062	2.54527	2.01913	2.93264	2.24824	2.09899
ABCB8	2.90534	2.53061	1.38547	2.10525	1.63237	2.57173
ABCB9	0.423627	0.387336	0.278388	0.446781	0.143154	0.631842
ABCC1	1.52231	1.05461	2.17214	1.49659	3.22032	1.9165
ABCC10	0.992474	0.547559	1.40232	0.494722	0.615437	0.67307
ABCC11	0	0	0	0.0491508	0.238176	0
ABCC12	0	0	0	0	0.117266	0
ABCC13	0	0	0	0	0	0
ABCC2	0.263291	0	0.0544862	0	0.076909	0
ABCC3	0.404693	0.0651446	0.363062	0	0.117411	0
ABCC4	2.37117	2.42233	1.89879	2.11626	1.88406	2.38609
ABCC5	0.690651	1.01366	1.53803	1.29165	1.93673	1.95694
ABCC6	0	1.00499	0	0.0367822	0.0275793	0.17219
ABCC6P1	0.799226	0	0	0	0	0.626539
ABCC6P2	0.807734	0.935791	0	1.04057	0	0
ABCC8	0	0	0	0	0	0
ABCC9	0.170699	0.171638	0.17568	0.110778	0.166121	0.24915
ABCD1	1.62297	2.18318	2.0635	2.34539	2.13609	2.11644
ABCD1P2	0	0	0	0	0	0
ABCD1P3	0	0	0	0	0	0
ABCD1P4	0	0	0	0	0	0
ABCD1P5	0	0	0	0	0	0
ABCD2	0	0	0.0462898	0	0.022309	0
ABCD3	3.39054	3.48019	3.48636	3.54538	3.29355	3.56146
ABCD4	0.844494	1.18823	0.929108	0.881136	1.09682	0.614177
ABCE1	3.89756	3.82078	4.02514	4.13189	4.21894	3.92306
ABCF1	2.08389	1.3319	2.76927	1.35198	2.2472	0.886495
ABCF2	1.89468	1.83323	3.20963	2.01648	3.15045	2.30984
ABCF2P1	0	0	0	0	0	0
ABCF2P2	0	0	0	0	0	0
ABCF3	2.05929	1.75886	3.02967	2.26364	3.06129	1.79101
ABCG1	0.240871	0.339038	0.212342	0.205975	0.583826	0.437288
ABCG2	0.0387455	0.0674383	0	0.213547	1.10315	1.27348
ABCG4	0	0	0	0	0	0
ABCG5	0.0552656	0	0.0550599	0	0	0
ABCG8	0	0	0	0	0	0
ABHD1	0.105038	0	0.0494854	0	0.0923621	0.100352
ABHD10	2.07987	2.74653	2.91087	1.43343	3.09682	1.62505
ABHD11	0.473694	0.727491	2.28198	0.659413	1.14822	0.889026
ABHD11-AS1	0	0.559683	0	0	0	0
ABHD12	2.60124	3.08202	3.31429	2.58017	3.34924	2.41975
ABHD12B	0.786984	0.567359	0.371558	0.294951	0.86891	0.747451
ABHD13	1.74077	1.74505	0.708381	0.195579	0.442616	0.274843
ABHD14A	0	0.655736	0.644665	0	3.02619	0.318854
ABHD14A-ACY1	2.79012	2.19932	2.4682	2.55407	0.461633	1.48959
ABHD14B	3.25332	2.73511	3.675	2.43038	3.65376	2.70746
ABHD15	1.11219	0.857169	0.659038	0.574274	0.68957	0.926843
ABHD16A	0.052148	0.169056	0.160187	0.702845	0.113392	0.754835
ABHD16B	1.80926	1.2067	0.290437	1.14072	0	2.41115
ABHD17A	2.04317	1.65037	3.22138	3.0964	2.6639	2.47915
ABHD17AP1	0	0	0	0	0	0.299636
ABHD17AP3	0	0	0	0	0	0
ABHD17AP4	0	0	0	0	0.0273777	0
ABHD17AP5	0	0	0	0.201506	0.21371	0
ABHD17AP6	0	0	0	0	0	0
ABHD17AP7	0	0	0	0	0	0
ABHD17AP8	0	0	0	0	0	0
ABHD17AP9	0	0	0	0	0	0
ABHD17B	0.494941	0.163318	0.112589	0.411967	0.372744	0.338074
ABHD17C	0.466129	0.307916	1.11807	1.64501	0.597869	1.52306
ABHD18	0.246795	0.467514	0.940441	0.220606	0.594469	0.79359
ABHD2	4.22974	4.09208	4.34271	4.41277	4.57777	4.23313
ABHD3	1.65644	2.69413	1.71889	1.48758	0.803203	0.741694
ABHD4	1.98303	1.19077	2.69844	1.11196	1.29016	1.84949
ABHD5	2.9096	3.12293	3.0632	3.32255	3.49021	3.13473
ABHD6	0.365057	0.458741	0.885605	0.506279	1.35859	0.239334
ABHD8	1.2917	1.99253	1.53958	1.50501	1.97381	0.813682
ABI1	2.95332	2.10039	3.17394	2.45972	3.04744	1.92512
ABI1P1	0	0	0	0	0	0
ABI2	3.59118	3.02445	3.07118	3.13321	3.45054	2.92598
ABI3	0	0	0	0.0868224	0.133497	0.932813
ABI3BP	1.01191	0.735603	0.757112	0.410595	0.600014	0.528085
ABL1	3.99051	3.87196	4.11275	3.93956	4.07829	3.65063
ABL2	2.47451	2.62881	2.55678	2.88872	2.7051	2.83222
ABLIM1	1.48705	0.838152	1.3298	1.29708	2.10089	1.48774
ABLIM2	0.153547	0	0	0	0	0
ABLIM3	2.66615	1.8532	2.10088	2.19449	2.02658	1.5139
ABO	0	0.022844	0	0.0442149	0	0
ABR	1.87231	1.85722	2.89559	2.9463	2.81255	2.13243
ABRA	0	0	0	0	0	0
ABRACL	4.64057	4.36192	4.10489	4.15748	4.3449	4.76311
ABRAXAS1	1.63533	1.38039	0.469286	1.26959	0.449891	1.04296
ABRAXAS2	0.417982	0.624895	1.10084	0.33394	0.218364	2.45154
ABT1	3.34447	1.91827	1.86184	3.20494	3.02677	2.58634
ABT1P1	0	0	0	0	0	0
ABTB1	1.05639	0.384348	2.432	1.12327	2.92445	0.40245
ABTB2	2.53799	1.57634	1.33542	2.00953	2.67431	1.81208
AC000041.1	0	0	0	0	0	0
AC000041.2	0	0	0	0	0	0
AC000077.1	0	0	0	0	0	0
AC000078.1	0	0	0	0	0	0
AC000081.1	0	0	0	0	0	0
AC000089.1	0	0	0.217275	0	0	0
AC000095.1	0	0	0	0	0	0
AC000095.2	0	0	0.227542	0	0	0
AC000111.2	0	0	0	0	0	0
AC000111.3	0	0	0	0	0	0
AC000362.1	0	0	0	0	0	0
AC000367.1	0	0.487945	0.173198	0.162036	0.160538	0.324617
AC000374.1	0	0	0	0	0	0
AC001226.2	0.956446	0.114751	0	0.11359	0.229837	0.21605
AC002056.1	0	0	0	0	0	0
AC002056.3	0	0	0	0	0	0
AC002069.1	0	0	0	0	0	0
AC002069.2	0	0	0	0	0	0
AC002075.1	0	0	0	0	0	0
AC002075.2	0	0	0	0	0	0.0591677
AC002076.2	0	0	0	0	0	0
AC002094.3	0	0	0	0	0	0
AC002115.2	0	0	0	0	0	0
AC002127.1	0	0	0	0	0	0
AC002310.3	0	0	0	0	0	0
AC002310.4	0	0	0	0	0.833361	0
AC002310.5	0	0	0	0	0	0.111436
AC002350.1	0	0	0	0	0	0
AC002366.1	0	0	0	0	0	0
AC002367.1	0	0	0	0	0	0
AC002381.1	0	0	0	0	0	0
AC002400.1	0	0	0	0	0	0
AC002429.1	0	0	0	0	0	0
AC002429.2	0	0.0725469	0.071524	0.122055	0.116623	0.0847207
AC002456.2	0	0	0	0	0.512912	0
AC002472.2	0	0	0	0.165271	0.307552	0.180122
AC002472.3	0	0.288071	0	0	0.277467	0
AC002472.4	0	0	0	0	0	0
AC002486.1	0	0	0	0	0.497213	0.507097
AC002486.2	0	0	0	0	0	0
AC002487.1	0	0	0	0	0	0
AC002504.1	0	0	0	0	0	0
AC002511.3	0	0	0	0	0	0
AC002519.2	0	0	0	0	0	0
AC002524.1	0.366494	0	0.34109	0.323826	0.325487	0.598438
AC002542.1	0	0	0	0	0	0
AC002543.1	0	0	0	0	0	0
AC002545.1	0	0.124551	0	0	0	0
AC002553.2	0	0	0	0	0	0
AC002553.3	0.665892	0.0633382	0	0	0	0
AC002558.1	0	0	0	0	0	0
AC002984.1	0	0	0	0	0	0
AC002985.1	1.27429	1.55332	3.58708	0	3.05307	0
AC002996.1	1.1291	0.304266	1.15862	0.61039	0	0.116963
AC003001.2	0.406502	0.206568	0.380421	0	0	0
AC003002.1	2.7085	1.75185	2.5596	2.19707	3.10925	3.13279
AC003002.2	1.4461	0	1.11927	0	0	0
AC003002.3	0	0.75631	0	0	0	0.360301
AC003002.4	1.42418	1.0857	0.580481	0	0	1.30169
AC003005.1	0	0	0	0	0	0
AC003006.1	1.68282	1.04789	0	7.92e-07	0.858895	1.56977
AC003029.1	0	0	0	0	0	0
AC003042.2	0	0	0.104524	0	0.0977844	0
AC003045.1	0	0	0	0	0	0
AC003071.1	0	0	0	0	0	0.225714
AC003071.2	0	0	0	0	0	0
AC003072.1	0	0.293138	0	0	0.786159	0.878439
AC003080.1	0	0	0.413294	0	0	0
AC003102.2	0	0	0	0	0	0
AC003669.1	0	0	0	0	0	0
AC003685.2	0	0	0	0	0	0
AC003686.1	0	0	0	0	0	0
AC003688.1	0	0	0	0	0	0
AC003958.1	0	0	0	0	0	0
AC003958.3	0	0	0	0	0	0
AC003958.4	0	0	0	0	0	0
AC003976.1	0	0	0	0	0	0
AC003982.1	0	0	0	0	0	0
AC003989.1	0	0	0	0	0	0
AC003989.2	0	0	0	0	0	0
AC004004.1	0	0	0	0	0	0
AC004006.1	0	0	0	0	0	0
AC004022.1	0	0	0	0	0	0
AC004022.2	0	0	0	0	0	0
AC004024.1	0	0	0	0	0	0
AC004057.1	6.4361	4.84852	6.36809	3.69958	6.28242	4.93601
AC004062.1	0	0	0	0	0	0
AC004066.1	0	0	0	0	0	0
AC004069.2	0	0	0	0	0	0
AC004074.1	0	0	0	0	0	0
AC004076.1	0	0	0	0.274695	0.564167	0
AC004080.3	0.692467	0	2.98801	1.69433	0	0
AC004099.1	0	0	0	0	0	0
AC004129.1	0	0	0	0	0	0
AC004129.2	0	0	0	0	0	0
AC004134.1	0	0	0	0	0	0
AC004217.1	0	0	0	0	0	0
AC004217.3	0	0	0	0	0	0
AC004223.1	0	0	0	0	0	0
AC004223.3	0.532748	0	1.09267	1.7731	2.64573	0
AC004224.1	0	0	0	0	0	0
AC004232.1	0	0	1.83325	0	0	0
AC004233.2	0	0	0	0	0	0
AC004263.1	0	0	0	0	0	0
AC004381.2	0	0	0	0	0	0
AC004383.1	0	0	0	0	1.12977	0
AC004386.1	1.08812	0.933136	1.0329	0.894029	0.677388	0.844958
AC004386.2	0	0	0	0	0	0
AC004448.1	1.68655	0.768885	0.966109	1.00872	1.52841	0.377439
AC004448.2	0	0	0	0	0	0
AC004453.1	0	0	0	0	0	0
AC004461.1	0	0	0	0	0	0
AC004467.1	0	0	0	0	0	0
AC004486.1	0	0	0	0	0	0
AC004522.1	0	0	0	0	0	0
AC004534.1	0	0	0	0	0	0
AC004552.1	0	0	0	0.69203	0	0
AC004554.1	0	0	0	0	0	0
AC004556.1	0	0	0	0	0	0
AC004584.2	0	0	0	0	0	0
AC004674.1	0	0	0	0	0	0
AC004675.2	0	0	0	0	0	0
AC004678.1	0	0.214344	0	0	0	0
AC004686.1	0	0	0	0	0	0.605958
AC004690.1	0	0	0	0	0	0
AC004691.2	0	0.120266	0	0	0	0
AC004692.1	0	0	0	0	0	0
AC004696.1	0.322861	0	1.50144	0.283606	2.07196	1.14175
AC004706.2	0	0	0	0	0	0
AC004706.3	0.237491	0	0	0.19034	0	0.259137
AC004706.4	0	0.0417775	0.471192	0	0.477768	0.200229
AC004754.1	0	0	0	0	0	0
AC004790.1	0	0	0	0	0	0
AC004801.1	0	0	0	0	0	0
AC004801.2	0	0	0	0	0	0
AC004805.1	0.300078	0	0	0	0	0
AC004805.2	0	0	0	0	0	0
AC004805.3	0	0	0	0	0	0
AC004812.1	0	0	0	0	0	0
AC004815.1	0	0	0	0	0	0
AC004825.1	0	0	0	0	0	0
AC004832.2	0	0	0	0	0	0
AC004832.3	2.53385	0	0	0	0	0.355225
AC004835.2	0	0	0	0	0	0
AC004837.1	0	0	0	0.310545	0.312452	0
AC004840.1	0	0	0	0	0	0
AC004840.2	0	0	0	0	0	0
AC004852.1	0	0	0	0	0	0
AC004852.3	0	0	0	0	0	0
AC004853.1	0	0	0	0	0	0
AC004853.2	0	0	0	0	0	0
AC004854.1	0	0	0	0	0	0
AC004858.1	0	0	0	0	0	0
AC004865.1	0	0	0	0	0	0
AC004866.1	0	0	0	0	0	0
AC004866.2	0	0	0	0	0	0
AC004870.1	0	0	0	0	0	0
AC004884.1	0	0	0	0	0	0
AC004890.1	1.3295	0	0	0	0	0
AC004890.2	0	0.0624019	0.720446	0	0.989511	0
AC004890.3	0	0	0	0	0	0
AC004893.1	0	0	0	0	0	0
AC004898.1	0	0	0	0	0	0
AC004899.1	0	0	0	0	0	0
AC004910.1	0.23831	0	0	0	0	0
AC004911.1	0	0	0	0	0	0
AC004922.1	1.36228	3.43999	1.96366	1.74772	1.57652	4.00425
AC004923.1	0	0	0.224991	0	0	0
AC004923.2	0	0	0	0	0	0
AC004923.3	0	0	0	0	0	0
AC004924.1	0	0	0	0	0	0
AC004938.1	0	0	0	0	0	0
AC004941.2	0	0	0	0	0	0
AC004945.1	0	0	0	0	0	0
AC004951.2	0.237603	0.740989	0	0	0	0.331785
AC004951.3	0.291854	0.477327	0.143208	0	0	0.387153
AC004965.1	0	0	0	0	0	0
AC004967.1	2.50675	2.13153	2.53546	2.7078	2.74903	0.429849
AC004975.1	0	0	0	0	0	0
AC004980.1	0.0431523	0.0337886	0.056836	0	0.0524551	0.0302809
AC004980.2	0	0.221735	0	0	0	0
AC004980.3	0	0	0.656762	0	1.44914	1.77132
AC004980.4	0	0	0	0	0	0
AC004980.5	0.0431523	0.0337886	0.056836	0	0.0524551	0.0302809
AC004980.6	0	0.221735	0	0	0	0
AC004986.1	0	0	0	0	0	0
AC004987.1	0	0	0	0	0	0
AC004987.2	0	0	0	0	0	0
AC004987.3	0	0	0	0	0	0
AC004987.4	0	0	0	0	0	0
AC004997.1	0.442555	0.736427	1.67864	1.4822	0.875919	2.07244
AC005000.1	0	0	0	0	0	2.05969
AC005000.2	0	0	0	0	0	0
AC005002.1	0	0	0	0	0	0
AC005002.2	0	0	0	0	0	0
AC005005.1	0	0	0	0	0	0
AC005005.2	0	0	0	0	0	0
AC005008.1	0	0	0	0	0	0
AC005011.1	0	0	0	0	0	0
AC005014.1	0	0	0	0	0	0
AC005017.1	0	0	0	0	0	0.386089
AC005019.1	0	0.444449	0	0	0	0
AC005020.1	0	0	0	0	0	0
AC005020.2	0	0	0	0	0	0
AC005033.1	0	0	0	0	0	0
AC005034.1	0	0	0	0	0	0
AC005040.1	0	0	0	0	0	0
AC005041.1	0.062456	0.022936	0.0550622	0.0531254	0.0393715	0
AC005041.2	0	0	0	0	0	0
AC005042.1	0	0	0.396067	0	0	0.222093
AC005042.3	0	0	0	0	0	0
AC005066.1	0	0	0	0	0	0
AC005070.1	0	0	0	0	0	0
AC005070.2	0	0	0	0	0	0
AC005077.1	0	0	0	0	0	0
AC005077.2	0.277473	0	0	0	0	0
AC005077.3	0	0	0	0	0	0
AC005077.4	0.178519	0.296901	0.122779	0.118751	0.285794	0.238563
AC005084.1	0	0	0	0	0	0
AC005086.2	0	0	0	0	0	0
AC005086.3	0	0	0	0	1.34456	0
AC005086.4	0	0	0	0.757276	0	0
AC005088.1	0	0	0	0	0	0
AC005094.1	0	0	0	0	0	0
AC005099.1	0	0	0	0	0	0
AC005102.1	0	0	0	0	0	0
AC005104.2	0	0	0	0	0	0
AC005105.1	0	0	0	0	0	0
AC005154.2	0	0	0	0	0	0
AC005154.3	0	0.114126	0	0	0	0
AC005154.6	1.59055	0	0	0	0.585752	0
AC005156.1	0	0	0	0	0	0
AC005165.2	0	0	0	0	0	0
AC005176.1	0	0.0897882	0.0848849	0	0.0802858	0.0871665
AC005176.2	0	0	0	0	0	0
AC005178.1	0	0	0	0	0	0
AC005181.1	0	0	0	0	0	0
AC005183.1	0	0	0	0	0	0
AC005185.1	0	0	0	0	0	0
AC005189.1	0	0	0	0	0	0
AC005191.1	0	0	0	0	0	0
AC005225.4	0	0	0	0	0	0
AC005229.1	0	0	0	0	0	0
AC005229.2	0	0	0	0	0	0
AC005229.3	0	0	0	0	0	0
AC005230.1	0	0	0	0	0	0
AC005237.2	0	0	0	0	0	0
AC005242.1	0	0	0	0	0	0
AC005244.1	0	0	0	0	0	0
AC005252.1	0	0	0	0	0	0
AC005255.1	4.32588	0	0	0	0	0.0479993
AC005258.1	0	0	0	0	0	0
AC005261.5	0	0	0	0	0	0
AC005262.1	0	0	0	0	0	0
AC005294.1	0	0	0	0	0	0
AC005296.1	0	0	0	0	0	0
AC005297.1	0	0	0	0	0	0
AC005297.2	0	0	0	0	0	0
AC005297.3	0	0	0	0	0	0
AC005300.1	0	0	0	0	0	0
AC005324.3	0	0	0	0	0	0
AC005324.4	0	0	0	0	0	0
AC005324.6	0	0	0	0	0	0
AC005326.1	0	0	0	0	0	0
AC005332.2	0	0.584815	0	0.444276	0.171277	0
AC005332.3	0	0	0	0	0	0.481591
AC005332.4	0	0	0	0	0	0
AC005336.1	0	0	0	0	0	0
AC005336.2	0	0	0	0	0	0
AC005341.1	0	0	0	0	0	0
AC005345.1	0	0	0	0	0	0
AC005351.1	0	0	0	0	0	0
AC005357.1	0	0	0	0	0	0
AC005357.2	0	0	0	0	0	0
AC005363.1	0	0	0	0	0	0
AC005377.1	0	0	0	0	0	0
AC005410.1	0	0	0	0	0	0
AC005412.1	0	0.169768	0	0	0	0.238205
AC005412.2	0	0	0	0	0	0
AC005412.3	0	0	0	0	0	0
AC005476.1	0	0	0	0	0	0
AC005479.1	0	0	0	0	0	0
AC005480.2	0	0	0	0	0	0
AC005495.1	0	0	0	0	0	0
AC005517.1	0	0	0	0.855062	0.373999	0
AC005517.2	0	0	0	0	0	0
AC005518.2	0	0	0	0	0	0
AC005519.1	0	0	0	0	0	0
AC005520.1	0	0.0883472	0	0	0	0
AC005520.4	0	0	0	0	0	0
AC005521.1	0	0	0	0.184122	0	0
AC005522.1	0	0	0	0	0	0
AC005524.1	0	0	0	0	0	0.504028
AC005531.1	0	0	0.119857	0	0	0
AC005532.2	0	0	0	0	0	0
AC005534.2	0	0	0	0	0	0
AC005539.1	0	0	0	0	0	0
AC005550.2	0	0	0	0	0	0
AC005551.1	0	0	0	0	0	0
AC005559.1	0	0	0	0	0	0
AC005562.2	0	0	0	0	0	0
AC005587.1	0	0	0	0	0	0
AC005588.1	0	0	0	0	0	0
AC005618.2	0	0	0	0	0.0629754	0
AC005622.1	0	0	0	0	0	0
AC005632.1	0	0	0	0	0	0
AC005632.3	0	0	0	0	0	0
AC005668.1	0	0	0	0	0	0
AC005670.2	1.79116	1.34797	0	1.54456	1.00719	0.857254
AC005682.1	0	0	0.108409	0	0.102244	0
AC005697.1	0	0	0	0	0	0
AC005702.2	0	0	0	0.756268	0.283552	0.676491
AC005702.3	0	0	0	0	0	0
AC005702.4	0.857428	0	0	0	0	0
AC005702.5	0	0	0	0	0	0
AC005722.1	0	0	0	0	0	0
AC005726.1	0	0	0	0	0	0
AC005726.2	0.164412	0.10238	0.823921	0.214708	0.406427	0.419954
AC005730.1	0	0	0	0	0	0
AC005740.1	0	0	0	0	0	0.361503
AC005740.2	0	0	0	0	0	0.465706
AC005741.1	0	0	0	0	0	0
AC005758.1	0	0	0	0	0	0
AC005771.1	0	0	0	0	0	0
AC005776.1	0	0	0	0	0	0
AC005777.1	0	0	0	0	0	0
AC005779.2	0	0	0	0	0	0
AC005786.1	0	0	0	0	0	0
AC005798.1	0	0	0	0	0	0.513414
AC005822.1	0	0.170214	0.167316	0	0	0
AC005828.6	0	0	0	0	0	0
AC005828.7	0	0	0	0	0	0
AC005829.1	0	0	0	0	0	0
AC005829.2	0	0	0	0	0	0
AC005832.2	0	0	0	0	0	0
AC005832.3	0	0	0	0	0	0
AC005832.4	0.750316	2.26784	4.1905	0	3.52767	0
AC005833.1	0	0	0	0	0	0
AC005833.3	1.53508	3.06828	1.80828	2.9705	2.29929	1.86645
AC005837.2	0	0	0	0	0	0
AC005838.1	0	0	0.298606	2.48081	0	0
AC005840.1	0	0	0	0	0	0
AC005840.2	0	0	0	0	0	0
AC005840.4	0	0	0	0	0	0
AC005841.2	0	0	0	0	0	0
AC005865.2	0.431278	0.193041	0.56569	0.407796	0.182716	0.213147
AC005868.1	0	0	0	0	0	0
AC005885.1	0.85884	0	0.123132	0	0	0
AC005899.2	0	0	0	0	0	0
AC005906.1	0	0	0	0	0	0
AC005908.1	0	0	0	0	0	0
AC005912.1	0	0	0	0	0.853615	0
AC005921.1	0	0	0	0	0	0
AC005943.1	1.88526	0	4.18941	1.65522	3.76312	2.44042
AC005951.1	0	0	0	0	0	0
AC005951.2	0	0	0	0	0	0
AC005962.1	0	0	0	0	0	0
AC005972.2	0	0	0	0	0	0
AC005972.3	0	0	0	0	0	0
AC005996.1	0	0	0	0	0.133844	0.102992
AC006001.1	0.438425	0	0	0	0	0
AC006001.3	2.07091	0.21178	1.59339	0.96438	2.18182	1.00191
AC006001.4	1.11554	0.406684	0	2.98001	0	0
AC006006.1	0	0	0	0	0	0
AC006011.1	1.85311	0	3.02474	0	3.76763	0
AC006011.2	0	0	0	0	0	0
AC006015.1	0	0	0	0	0	0
AC006020.1	0	0	0	0	0	0
AC006022.1	0	0	0	0	0	0
AC006023.1	0	0	0	0	0	0
AC006023.2	0	0	0	0	0	0
AC006026.1	0	0	0	0	0	0
AC006026.2	0	0	0	0	0	0
AC006028.1	0	0	0	0	0	0
AC006030.1	0	0	0	0	0	0
AC006033.1	0	0	0	0	0	0
AC006042.3	0.119283	0	0	0	0	0
AC006065.1	0	0.215652	0	0	0.204072	0
AC006065.2	0	0	0	0	0	0
AC006070.1	0	0	0	0	0	0
AC006077.1	0	0	0	0	0	0
AC006115.2	0	0	0	0	0	0
AC006116.1	0	0	0	0	0	0
AC006116.2	0	0	0	0	0	0
AC006116.3	0	0	0	0	0	0
AC006116.7	0	0.106483	0	0.20874	1.06658	0
AC006120.1	0	0	0	0	0	0
AC006122.1	0	0	0	0	0	0.438776
AC006130.2	0	0	0	0	0	0
AC006133.1	0	0	0	0	0	0
AC006144.1	0	0	0.106116	0.0937263	0.0930157	0.100971
AC006158.1	0	0	0	0	0	0
AC006160.2	0	0	0	0	0	0
AC006195.1	0	0	0	0	0	0
AC006197.1	0	0	0	0	0	0
AC006199.1	0	0	0	0	0	0
AC006210.1	0	0	0	0	0	0
AC006210.2	0	0	0	0	0	0.105354
AC006236.1	0	0	0	0	0	0
AC006254.1	0.0291759	0.0816588	0.231869	0	0.193608	0
AC006254.2	0	0	0	0	0	0
AC006254.3	0	0	0	0	0	0
AC006262.4	0	0	0	0	0	0
AC006269.1	0.351692	0	0.326052	0	0.899897	0
AC006270.2	0	0	0	0	0	0
AC006270.3	0	0	0	0	0	0
AC006272.2	0	0	0	0	0	0
AC006326.1	0	0	0	0	0	0
AC006328.1	0	0	0	0	0	0
AC006328.2	0	0	0	0	0	0
AC006329.2	0	0	0	0	0	0
AC006335.1	0	0	0	0	0	0
AC006335.2	0	0	0	0	0	0
AC006335.3	0	0	0	0	0	0
AC006338.1	0	0	0	0	0	0
AC006338.2	0	0	0	0	0	0
AC006349.1	0	0	0	0	0	0
AC006355.1	0	0	0	0	0	0
AC006362.1	0	0	0	0	0	0
AC006363.1	0	0	0	0	0	0
AC006366.1	0	0	0	0	0	0
AC006380.1	0	0	0	0	0	0
AC006386.1	0	0	0	0	0	0
AC006386.2	0	0	0	0	0	0
AC006390.1	0	0	0	0	0	0
AC006427.1	0	0	0	0	0	0
AC006441.2	0	0	0	0	0	0
AC006441.5	0	0	0	0	0	0
AC006445.1	0	0	0	0	0	0
AC006445.2	0	0	0	0.389132	0	0
AC006449.4	3.05102	0	2.2176	3.27972	0	1.05105
AC006453.1	0	0	0	0	0	0
AC006453.3	0	0	0	0	0	0
AC006453.4	0.266584	0	0	0	0.328657	0
AC006453.5	0	0	0	0	0	0
AC006455.2	0	0	0	0	0	0
AC006455.3	0	0	0	0	0	0
AC006455.6	0	0	0	0	0	0
AC006455.7	0	0	0	0	0	0
AC006457.1	0	0	0	0	0	0
AC006461.1	0	0	0	0	0	0
AC006463.1	0	0	0	0	0	0
AC006463.2	0	0.619126	0	0	0	0
AC006466.1	0	0	0	0	0	0
AC006480.1	0	0	0.542041	0.517338	0	0
AC006483.1	0	0	0	0	0	0
AC006484.1	0	0	0	0	0	0
AC006486.1	0.172763	1.976	0.822516	0	1.2656	0.891531
AC006499.1	0	0	0	0	0	0
AC006499.2	0	0	0	0	0	0
AC006499.3	0	0	0	0	0	0
AC006499.4	0	0	0	0	0	0
AC006499.5	0	0	0	0	0	0
AC006499.6	0	0	0	0	0	0
AC006499.7	0	0	0	0	0	0
AC006499.8	0	0	0	0	0	0
AC006504.3	0.387144	0	0	0.341045	0	0
AC006504.4	0	0	0	0	0	0
AC006504.6	0	0	0	0	0	0
AC006509.1	0.507453	0.729643	1.12584	0.334434	0	0.859792
AC006509.2	0	0	0	0	0	0
AC006511.1	0	0	0	0	0	0
AC006511.2	0	0	0	0.255941	0	0
AC006512.1	0	0	0	0	0	0
AC006512.2	0	0	0	0	0	0
AC006517.1	0	0	0	0	0	0
AC006518.1	0	0	0	0	0	0
AC006518.2	0	0	0	0	0	0
AC006518.3	0	0	0	0	0	0
AC006518.4	0	0	0	0	0	0
AC006518.5	0	0	0	0	0	0
AC006518.6	0	0	0	0	0	0
AC006529.1	0	0	0	0	0	0
AC006530.1	0	0	0	0	0	0
AC006534.1	0	0	0	0	0	0
AC006538.2	0	0	0	0	0	0.114321
AC006539.1	0	0	0	0	0	0
AC006539.2	0	0	0	0	0	0
AC006539.3	0	0	0	0	0	0
AC006548.1	1.35467	1.01392	1.25174	2.50019	2.35356	0.400065
AC006548.2	0	0	0	0	0	0
AC006557.2	0	0	0	0	0	0
AC006557.4	0	0	0.188187	0	0	0
AC006557.5	0	0	0	0	0	0
AC006600.1	0	0	0	0	0	0
AC006924.1	0	0	0	0	0	0
AC006927.1	0	0	0	0	0	0
AC006927.2	0	0	0	0	0	0
AC006927.3	0	0	0	0	0	0
AC006927.4	0	0	0	0	0	0
AC006946.1	0	0	0	0	0	0.623585
AC006960.1	0	0	0	0	0	0
AC006965.1	0	0	0	0	0	0
AC006967.1	0	0	0	0	0	0
AC006970.1	0	0	0	0	0	0
AC006970.2	0	0	0	0	0	0
AC006971.1	0	0.0333662	0.0655628	0.0321163	0	0
AC006978.1	0	0.246736	0	0	0	0
AC006978.2	0	0.0957846	0.444708	0	0.908968	0
AC006986.1	0	0	0	0	0	0
AC006987.1	0	0	0.356966	0	0	0.355846
AC006987.2	0.383498	0.817698	1.14579	2.00535	1.34596	2.21051
AC006987.3	0	0	0	0	0	0
AC006987.4	0	0	0	0	0	0
AC006989.1	0	0	0	0	0	0
AC006994.1	0	0	0	0	0	0
AC007000.1	0	0	0	0	0	0
AC007000.2	0	0	0	0	0	0
AC007012.1	0	0	0	0	0	0
AC007016.1	0	0	0	0	0	0
AC007040.2	0.201913	0.454517	0.471553	0.406347	0.453531	0.0379304
AC007041.1	0	0	0	0	0	0
AC007064.1	0	0	0	0	0	0
AC007064.3	0	0	0	0	0	0
AC007064.4	0	0	0	0	0	0
AC007066.1	0	0	0	0	0	0
AC007068.1	0.284302	0.597582	0.498511	0.197596	0.712734	0
AC007068.2	0	0	0	0	0	0
AC007098.1	0	0	0	0	0	0
AC007115.1	0	0	0	0	0	0
AC007136.1	0	0	0	0	0	0
AC007151.1	0	0	0	0	0	0
AC007160.1	0	0	0	0	0	0
AC007161.1	0	0	0	0	0	0
AC007161.2	0	0	0	0	0	0
AC007179.3	0	0	0	0	0	0
AC007182.2	0	0	0	0	0	0
AC007192.1	0	0	0	0	0	0
AC007204.1	0	0	0	0	0	0
AC007204.2	0	0	0	0	0	0
AC007207.1	0	0	0	0	0	0
AC007215.1	0	0	0	0	0	0
AC007216.5	0.729518	0	0	0	0	0
AC007224.1	0	0	0	0	0	0
AC007225.1	0	0	0	0	0	0
AC007225.2	0	0	0	0	0	0
AC007228.1	0	0	0	1.16227	0	0
AC007229.1	0	0	0	0	0	0
AC007237.1	0	0	0	0	0	0
AC007238.1	0	0	0	0.0911878	0	0.102975
AC007240.1	0.271242	0	0	0.386583	0.414275	0.615821
AC007241.1	0	0	0	0	0	0
AC007253.1	0	0	0	0	0	0
AC007255.2	0	0	0	0	0	0
AC007256.1	0	0	0	0	0	0
AC007262.1	0	0	0	0	0	0
AC007274.1	0	0	0	0	0	0
AC007274.2	0	0	0	0	0	0
AC007274.3	0	0	0	0	0	0
AC007275.1	0	0	0	0	0	0
AC007279.1	0	0	0	0	0.193923	0
AC007283.2	0	0	0	0	0	0
AC007312.1	0	0	0	0	0	0
AC007318.1	0	0	0.391338	0	0.471084	0.406012
AC007318.2	0	0	0	0.944011	0	0
AC007322.1	0	0	0	0	0	0
AC007322.2	0	0	0	0	0	0
AC007322.3	0	0	0	0	0	0
AC007322.4	0	0	0	0	0	0
AC007325.1	0	0	0	0	0	0
AC007325.2	0	0	0	0	0	0
AC007325.3	0	0	0	0	0.525291	0
AC007325.4	0	0	0	0	0	0
AC007326.1	0	0	0	0	0	0
AC007326.3	0	0	0	0	0	0
AC007326.4	0.954195	1.32196	1.23339	0.385123	0.976727	1.15871
AC007327.1	0	0	0	0	0	0
AC007342.2	0	0	0	0	0	0
AC007342.3	0	0.0771182	0	0	0	0.0912146
AC007346.1	0	0	0	0	0	0
AC007346.2	0	0	0	0	0	0
AC007347.2	1.27068	0	0	0	1.05072	0
AC007363.1	0	0	0	0	0	0
AC007365.2	0	0	0	0	0	0
AC007375.1	0	0	0	0	0	0
AC007375.2	0	0	0	0	0	0
AC007376.1	0	0	0	0	0	0
AC007383.1	0	0	0	0	0	0
AC007383.6	0	0.915082	0	0	0	0
AC007386.1	0	0	0	0	0	0
AC007387.1	0	0	0	0	0	0
AC007389.2	0	0	0	0	0	0
AC007389.4	0.427138	0	0	0	0	0
AC007390.1	0	0	0	0	0	0
AC007394.1	0	0	0	0	0	0
AC007395.1	0	0	0	0	0	0
AC007424.1	0	0	0.0995593	0	0	0
AC007435.1	0	0	0	0	0	0
AC007448.1	0	0	0	0	0	0
AC007450.2	0	0	0	0	0	0
AC007450.3	0	0	0	0	0	0
AC007450.4	0	0.35425	0	0	0	0.358146
AC007458.1	0	0	0	0	0	0
AC007494.1	0	0	0	0	0	0
AC007536.1	0	0	0	0	0	0
AC007537.1	0	0	0	0	0.354203	0
AC007537.2	0	0	0	0	0	0
AC007537.3	0	0	0	0	0	0
AC007537.4	0	0	0	0	0.354203	0
AC007537.5	0	0.399731	0	0.206896	0.208127	0
AC007547.1	0	0	0	0	0	0
AC007547.2	0	0	0	0	0	0
AC007551.1	0	0	0	0	0	0
AC007551.2	0	0	0	0	0	0
AC007552.1	0	0	0	0	0	0
AC007559.1	0	0	0	0	0	0
AC007560.1	0	0	0	0	0	0
AC007562.1	0	0	0	0	0	0
AC007563.3	0	0	0	0	0	0
AC007566.2	0	0	0	0	0	0
AC007568.1	0	0	0	0	0	0
AC007599.1	0	0	0	0	0	0
AC007603.3	0	0	0	0	0	0
AC007610.3	0	0	0	0	0	0
AC007618.1	0	0	0	0	0	0
AC007619.2	0	0	0	0	0	0
AC007619.3	0	0	0	0	0	0
AC007620.1	0	0	0	0	0	0
AC007621.1	0	0	0	0	0	0
AC007621.2	0	0	0	0	0	0
AC007622.1	0	0	0	0	0	0
AC007663.1	0	0	0	0	0	0
AC007671.2	0	0	0	0	0	0
AC007677.1	0	0	0	0	0	0
AC007679.1	0	0	0	0	0	0
AC007679.3	0	0	0	0	0	0
AC007679.4	0	0	0	0	0	0
AC007679.6	0	0	0	0	0	0
AC007683.1	0	0	0	0	0	0
AC007685.1	0	0	0	0	0	0
AC007686.1	0	0.698647	0	0	0	0
AC007688.1	0	0	0	0	0	0
AC007690.1	0	0.404084	0	0	0	0
AC007718.1	0	0	0	0	0	0
AC007731.2	0.193926	0	0.180653	0	0	0.401796
AC007731.5	0	0	0	0	0	0.512631
AC007738.1	0	0	0	0	0	0
AC007742.1	0	0	0	0	0	0
AC007742.2	0	0	0	0	0	0
AC007751.1	0	0	0	0	0	0
AC007751.2	0	0	0	0	0	0
AC007785.2	0	0	0	0	0	0
AC007790.1	0	0	0	0	0	0
AC007834.2	0	0	0	0	0	0
AC007842.1	0.0428126	0.0381959	0	0	0.259685	0
AC007842.2	0.0428126	0.0381959	0	0	0.259685	0
AC007849.2	0	0	0	0	0	0
AC007881.1	0	0	0	0	0	0
AC007899.1	0	0	0	0	0	0
AC007906.2	0	0.444552	0.0928551	0	0	0
AC007908.1	0	0	0	0	0	0
AC007919.1	0	0	0	0	0	0
AC007919.2	0	0	0	0	0	0
AC007923.2	0	0	0	0	0	0
AC007923.3	0	0	0	0	0	0
AC007954.1	0	0	0	0	0	0
AC007956.1	0	0	0	0	0	0
AC007967.1	0	0	0	0	0	0
AC007967.2	0	0	0	0	0	0
AC007967.3	0	0	0	0	0	0
AC007967.4	0	0	0	0	0	0
AC007969.1	0	0.484736	0.853308	0.440088	0.754915	0
AC007969.2	0	0	0	0	0	0
AC007991.1	0	0	0	0	0	0
AC007992.1	0	0	0	0	0	0
AC007992.2	0	0	0	0	0	0
AC007993.1	0	0	0	0	0	0
AC007998.1	0	0	0	0	0.251441	0
AC007998.2	0	0.789257	0	0	0.969649	0.683433
AC008011.1	0	0	0	0	0	0
AC008013.1	0	0	0.482337	0	0	0.534942
AC008013.2	1.03858	0	0	0.575153	0	0
AC008013.3	0.284614	0	0	0	0	0
AC008015.1	0	0	0	0	0	0
AC008021.1	0	0	0	0	0	0.480232
AC008026.1	0.527607	0	0.812786	0	0	0.463038
AC008026.2	0	0	0	0	0	0
AC008033.1	0	0	0	0	0	0
AC008033.2	0	0	0	0	0	0
AC008038.1	1.10206	1.23624	1.16574	0.99566	1.36005	1.43648
AC008040.2	0	0	0	0	0	0
AC008040.3	0	0	0	0	0	0
AC008040.4	0	0	0	0	0	0
AC008055.1	0	0	0	0	0	0
AC008065.1	0	0	0	0	0	0
AC008066.1	0	0	0	0	0	0
AC008069.1	0.192669	0	0	0	0	0
AC008072.1	1.1287	1.04962	1.20577	1.02527	1.08156	1.35145
AC008073.3	0	0.116005	0	0.0833011	0	0
AC008074.2	0	0	0	0	0	0
AC008083.2	0	0	0	0	0	0
AC008121.1	0	0	0	0	0	0
AC008126.1	0	0	0	0	0	0.418776
AC008127.2	0	0	0	0	0	0
AC008132.1	0.037585	0	0	0	0.0237013	0
AC008132.2	0	0	0	0	0	0
AC008134.1	0	0	0	0	0	0
AC008147.3	0	0	0	0	0	0
AC008147.4	0	0	0	0	0	0
AC008155.1	0.69695	0.62673	0	0	0	0
AC008155.2	0	0	0	0	0	0
AC008158.1	0.0983193	0	0.131119	0	0.194287	0
AC008162.1	0	0	0	0	0	0
AC008162.2	0	0	0	0	0	0
AC008163.1	0	0	0.0338373	0	0	0
AC008171.1	0	0	0	0	0	0
AC008173.1	0	0	0	0	0	0
AC008175.2	0	0	0	0	0	0
AC008264.1	0	0	0	0	0	0
AC008267.1	0	0.154638	0	0	0	0
AC008267.2	0	0.173706	0	0	0	0
AC008267.3	0	0	0	0	0	0
AC008267.4	0	0	0	0	0	0
AC008267.5	0	0	0	0	0	0
AC008267.6	0	0	0	0	0	0
AC008277.2	0	0	0	0	0	0
AC008280.1	0	0	0	0	0	0
AC008280.2	0	0.117095	0.511821	0	0	0
AC008379.1	0	0	0	0	0	0
AC008385.1	0	0	0	0	0	0
AC008393.2	0	0	0	0	0	0
AC008403.1	0	0	0	0	0	0
AC008410.1	0	0	0	0	0	0
AC008412.1	0	0	0	0	0	0
AC008413.1	0	0	0	0	0	0
AC008417.1	0	0	0	0	0	0
AC008427.1	0	0	0	0	0	0
AC008429.2	0	0	0	0	0.189443	0
AC008429.4	0	0	0	0	0	0
AC008432.1	0	0	0	0	0	0
AC008443.7	0	0	0	0	0	0
AC008446.1	0	0	0	0	0	0
AC008463.1	0	0	0	0	0	0
AC008481.1	0	0	0.511847	0	0.489921	0
AC008481.2	0	0	0	0.334625	0	0
AC008481.3	0.0366836	0	0	0.213777	0	0
AC008489.1	0	0	0	0	0	0
AC008494.1	0	0	0	0	0.205915	0
AC008496.1	0	0	0	0	0	0
AC008498.1	0.654646	0	0.353608	0.584912	0	0
AC008507.1	0	0.731363	0	0	0.412105	0.748307
AC008507.3	0	0	0	0	0	0
AC008507.4	0	0	1.05792	0	0	0
AC008514.2	0.353523	0	0	0.21618	0	0
AC008521.1	0	0	0	0	0	0
AC008521.2	0	0	0	0	0	0
AC008526.1	0	0	0	0	0	0
AC008537.1	0	0	0	0	0	0
AC008543.2	0	0	0	0	0	0
AC008549.3	0	0	0	0	0	0
AC008550.1	0	0	0	0	0	0
AC008555.4	0	0	0	0	0	0
AC008555.7	0	0	0	0	0	0
AC008560.1	1.32096	0.566558	0.461641	0.234167	0.916799	0.682661
AC008562.1	0	0	0	0	0	0
AC008565.1	0	0	0	0	0	0
AC008567.1	0	0	0	0.129284	0	0
AC008571.1	0	0	0	0	0	0
AC008575.1	0	0	0	0	0	0
AC008575.2	0.845387	0	2.85447	3.0523	2.59078	0.401345
AC008592.3	0	0	0	0	0	0
AC008608.1	0	0	0	0	0	0
AC008620.1	0	0	0	0	0	0
AC008620.2	0	0	0	0	0	0
AC008622.1	0	0	0	0	0	0
AC008622.3	0	0	0	0	0	0
AC008626.1	0	0	0	0	0	0
AC008626.2	0	0	0	0	0	0
AC008628.1	0	0	0	0	0	0
AC008628.2	0	0	0	0	0	0
AC008629.2	0	0	0	0	0	0
AC008629.3	0	0	0	0	0	0
AC008638.1	0	0	0	0	0	0
AC008638.2	0	0	0	0	0	0
AC008638.3	0	0	0	0	0	0
AC008676.3	0	0	0	0	0	0
AC008677.1	0	0	0	0	0	0
AC008677.2	0	0	0	0	0	0
AC008677.3	0	0	0	0	0	0
AC008687.1	0	0	0	0	0	0.484261
AC008687.4	0	0	0	0	0	0
AC008687.5	0	0	0	0	0	0
AC008687.6	0	0	0	0	0	0
AC008687.7	0	0.183332	0	0	0.173465	0
AC008687.8	0	0	0	0	0	0
AC008694.1	0	0	0	0	0	0
AC008694.2	0	0	0.713954	0.680356	0	0
AC008695.1	0	0	0	0	0	0
AC008696.1	0	0	0	0	0	0
AC008716.1	0	0	0	0	0	0
AC008723.1	0	0	0	0	0	0
AC008725.1	0	0	0.0675053	0	0	0
AC008735.6	0	0	0	0	0	0
AC008737.2	0	0	0	0	0	0
AC008739.2	0	0	0	0	0	0
AC008739.3	0	0	0	0	0	0
AC008740.1	0.59679	0	0	0	0	0
AC008740.2	9.83e-08	0	0	0	0	0
AC008745.1	0	0	0	0	0	0
AC008746.2	0	0	0	0	0	0
AC008746.5	0	0	0	0	0	0
AC008749.1	0	0	0	0	0	0
AC008750.6	0	0	0	0	0	0
AC008750.8	0	0	0	0.593111	0	0.50016
AC008751.1	0	0	0	0	0	0
AC008751.2	0	0	0	0	0	0
AC008752.3	0	0	0	0.233501	0	0
AC008753.1	0	0	0	0	0	0
AC008758.1	0.0753263	0.0342803	0.0651843	0	0	0.260004
AC008758.3	0	0	0	0	0	0.0872698
AC008758.4	0.0691835	0	0	0	0	0
AC008758.5	0	0	0.34395	0	0.488983	0
AC008758.6	0.335701	0	0.311093	0	0.526002	0
AC008759.1	0	0	0	0	0	0
AC008763.2	0.671697	0.591888	2.27368	0.839863	0.617828	0.836901
AC008763.3	0	0	0	0	0	0
AC008764.1	0.127306	0	0	0	0	0
AC008764.4	3.55604	3.35145	2.89667	2.8258	3.52672	4.02355
AC008770.2	0	0	0	0.571863	0	0
AC008770.3	0	0	0	0	0.0776576	0
AC008782.1	0	0	0	0	0	0
AC008798.1	0	0	0	0	0	0
AC008799.1	0	0	0	0	0	0
AC008802.1	0	0	0	0	0	0
AC008805.1	0	0	0	0	0	0
AC008813.1	0	0.191768	0.194227	0	0	0
AC008814.1	0	0	0	0	0	0
AC008817.1	0	0	0	0	0	0
AC008825.2	0	0	0	0	0	0
AC008833.1	0	0	0	0	0	0
AC008834.1	0	0	0	0	0	0
AC008837.1	0	0	0	0	0	0
AC008837.2	0	0	0	0	0	0
AC008850.1	0	0	0	0	0	0
AC008868.1	0	0	0	0	0	0
AC008878.1	0	2.46023	0	0	0	1.93609
AC008878.2	0	0	0	0	0	0
AC008878.3	0	0	0.902496	0	0.0176573	0
AC008885.1	0	0	0	0	0	0
AC008897.1	0	0	0	0	0	0
AC008945.1	0	0	0	0	0	0.37834
AC008953.1	0	0	0	0	0	0
AC008958.1	0	0	0	0	0	0
AC008962.1	0	0	0	0	0	0
AC008967.1	0	0	0	0	0	0
AC008982.1	3.10085	0	3.09326	3.07424	2.84932	0
AC008982.3	3.10085	0	3.09326	3.07424	2.84932	0
AC008984.1	0	0	0	0	0	0
AC008984.3	0	0	0	0	0	0
AC008984.4	0	0	0	0	0	0
AC008984.5	0	0	0	0	0	0
AC009014.1	0	0	0	0	0	0
AC009022.1	0	0	0	0	0	0
AC009027.1	0	0	0	0	0	0
AC009053.1	0.905622	0.59246	0.144952	0.868197	0.864661	0.0855135
AC009053.4	0	0	0	0	1.23038	0
AC009060.2	0	0	0	0	0	0
AC009075.2	0	0	0	0	0	0
AC009078.1	0	0	0	0	0	0
AC009078.2	0	0	0	0	0	0
AC009086.1	0	0	0	0	0	0
AC009086.2	0	2.98969	0	0	0	3.54214
AC009088.4	0	0	0	0	0	0
AC009091.1	0	0	0	0	0	0
AC009093.3	0	0	0.084432	0	0	0
AC009093.8	0	1.88809	0	1.47764	0	0
AC009093.9	0	0	0	0	0	0
AC009094.1	0	0	0	0	0	0
AC009101.1	0	0	0	0	0	0
AC009101.2	0	0	0	0	0	0
AC009108.1	0	0	0	0	0	0
AC009117.1	0	0	0	0	0	0
AC009119.2	0	0.759614	0.399681	0	0.534395	0.359608
AC009120.1	0	0	0	0	0.670649	0
AC009120.3	0	0	0	0	0	0
AC009122.1	0	0	0	0	0	0
AC009127.1	0	0	0	0	0	0
AC009127.3	0	0	0	0	0	0
AC009132.1	0	0	0	0	0	0
AC009133.6	0	0	0	0.0212653	0	0
AC009136.2	0	0	0	0	0	0
AC009153.1	0	0	0	0	0	0
AC009161.1	0	0	0	0	0	0
AC009163.2	0	0	0	0	0	0
AC009163.4	0.274502	0.131237	3.1458	0.85831	1.9771	0
AC009163.5	0	0	0	0	0	0
AC009169.1	0	0	0	0	0	0
AC009171.1	0	0	0	0	0	0
AC009220.1	0	0	0	0	0	0
AC009220.2	0	0.0887814	0	0	0	0
AC009220.3	0	0	0	0	0.298486	0
AC009233.1	0	0	0	0	0	0
AC009237.1	0	0	0.235654	0	0	0
AC009237.10	0	0	0	0	0	0
AC009237.11	0	0	0	0	0	0
AC009237.12	0	0	0	0	0	0
AC009237.13	0	0	0	0	0	0
AC009237.16	0.403607	0.369311	0.375741	0.825008	0	0.37243
AC009237.17	0	0.422305	0	0	0	0
AC009237.2	0	0	0	0	0	0
AC009237.3	1.73131	1.63153	1.58003	1.16356	1.14556	1.07913
AC009237.4	0	0	0	0	0	0
AC009237.5	0	0	0	0	0	0
AC009237.6	0.284327	0.453161	0	0.247972	0.616019	1.01056
AC009237.7	0	0	0	0	0	0
AC009237.8	1.60086	0	1.35218	1.10662	0.514484	0
AC009237.9	0	0	0	0	0	0
AC009238.1	0.284327	0.453161	0	0.247972	0.616019	1.01056
AC009238.2	1.01672	0	0	0	0	0
AC009238.3	0	0	0	0	0	0
AC009244.1	0.954299	0.988485	0	0.170176	0.135048	4.69868
AC009245.1	0.405736	0	0.217603	0	0	0.205248
AC009248.1	0	0	0	0	0	0
AC009263.1	0	0	0	0	0	0
AC009268.1	0	0	0	0	0	0
AC009269.1	0.224706	0	0	0	0.331674	0
AC009269.2	0	0	0	0	0	0
AC009286.1	0	0	0	0	0	0
AC009286.2	0	0	0	0	0	0
AC009286.3	0	0	0	0	0	0
AC009296.1	0	0	0	0	0	0
AC009299.1	0	0	0	0	0	0
AC009299.2	0	0	0	0	0	0
AC009302.1	0	0	0	0.0301827	0	0.0189592
AC009303.1	0.639168	0	0	0	0	0
AC009310.1	0	0	0	0	0	0
AC009313.2	0	0	0	0	0	0
AC009314.1	0	0	0	0	0	0
AC009319.1	0	0	0	0	0	0
AC009336.2	0.363009	1.77156	1.12315	1.09535	0.663201	1.07546
AC009362.1	0	0	0	0	0	0
AC009413.1	0	0	0	0	0	0
AC009414.1	0	0	0	0	0	0
AC009414.3	0	0	0	0	0	0
AC009452.1	0	0	0	0	0	0
AC009474.1	0	0	0	0	0	0
AC009474.2	0	0	0	0	0	0
AC009477.1	0	0	0	0	0	0
AC009477.2	0	0	0	0	0	0
AC009480.2	0	0	0	0	0	0
AC009487.2	0.0630418	0.0273926	0.0532591	0.0525439	0.0549481	0.0282148
AC009494.1	0	0	0	0	0	0
AC009500.1	0	0	0	0	0	0
AC009501.2	0	0	0	0	0	0
AC009501.3	0	0	0	0	0	0
AC009502.2	0	0	0	0	0	0
AC009506.2	0	0.204317	0	0	0.193451	0
AC009509.3	0	0	0	0	0	0
AC009517.1	0	0	0	0	0	0
AC009518.2	0.259453	0	0	0	0	0
AC009518.3	0	0	0	0	0	0
AC009533.1	0.586652	0.868553	0.247141	0.435952	0.332821	0.446017
AC009533.2	0	0	0	0	0	0
AC009541.1	0	0	0	0	0	0
AC009542.2	0	0	0	0	0	0
AC009567.2	0	0	0	0	0	0
AC009597.2	0	0	0	0	0	0
AC009643.1	0	0	0	0	0	0
AC009643.2	0	0	0	0	0	0
AC009646.1	0	0	0	0	0	0
AC009660.1	0	0	0	0	0	0
AC009690.1	0	0	0	0	0	0
AC009690.3	0	0	0	0	0	0
AC009712.1	0	0	0	0	0	0
AC009729.1	0	0	0	0	0	0
AC009779.1	0	0	0	0	0	0
AC009779.3	0.737489	1.17514	0	0	0	0.0501322
AC009779.4	0	0	0	0	0	0
AC009779.6	0	0	0	0	0	0
AC009779.7	0	0	0	0	0	0
AC009779.8	0	0	0.0336694	0	0	0
AC009784.1	0	0	0	0	0	0
AC009800.1	0	0	0	0	0	0
AC009804.1	0	1.1628	2.77229	0	1.54873	0
AC009812.2	0	0	0	0	0	0
AC009831.2	0	0	0	0	0	0
AC009831.3	0	0	0	0	0	0
AC009852.2	0	0	0	0	0	0
AC009879.1	0	0	0	0	0.11148	0
AC009884.2	0	0	0	0	0	0
AC009892.2	0	0	0	0	0	0
AC009892.3	0	0	0	0	0	0
AC009901.1	0	0	0	0	0	0
AC009901.2	0	0	0	0	0	0
AC009902.1	0	0	0	0	0	0
AC009927.1	0	0	0	0	0	0
AC009927.2	0	0	0	0	0	0
AC009945.1	0	0	0	0	0	0
AC009947.1	0	0	0	0	0	0
AC009947.2	0	0	0	0	0	0
AC009948.2	0	0	0	0	0.423447	0.254314
AC009950.2	0	0	0	0	0	0
AC009961.2	0	0	0	0	0	0
AC009961.3	0	0	0	0	0	0.234058
AC009963.1	0	0	0	0	0	0
AC009963.2	1.81217	0	1.015	0	0	1.52273
AC009963.3	0	0	0	0	0	0
AC009963.4	0	0	0	0	0	0
AC009965.2	0	0	0	0	0	0
AC009967.1	0	0	0	0	0	0
AC009969.1	0	0	0	0	0	0
AC009977.1	0	0	0	0	0	0
AC009994.1	0	0	0	0	0	0
AC009997.1	0	0	0	0	0	0
AC010086.1	0	0	0	0	0	0
AC010086.2	0	0	0	0	0	0
AC010087.1	0	0	0	0	0	0
AC010095.1	0	0	0	0	0	0
AC010099.1	0	0	0	0	0	0
AC010099.2	0	0	0	0	0	0
AC010099.3	0	0	0	0	0	0
AC010132.2	0	0	0	0.15009	0	0
AC010132.3	3.21167	0.603486	3.31256	3.40722	3.15484	0.381441
AC010133.1	0	0	0	0	0	0
AC010141.1	0	0	0	0	0	0
AC010141.2	0	0	0	0	0	0
AC010141.3	0	0	0	0	0	0
AC010149.2	0	0	0	0	0	0
AC010153.1	0	0	0	0	0	0
AC010154.1	0	0	0	0	0	0
AC010182.1	0	0	0	0	0	0
AC010186.2	0.232102	0	1.57592	0.370124	0.423935	0.115879
AC010198.2	0	0	0	0	0	0
AC010200.1	0.120624	0	0	0	0	0
AC010200.2	0	0	0	0	0	0
AC010202.1	0	0	0	0	0	0
AC010203.1	0	0.714106	0.425452	0	0	0.119735
AC010234.1	0	0	0	0	0	0
AC010240.1	0	0	0	0	0	0
AC010240.2	0	0	0	0	0	0
AC010255.3	0	0	0	0	0	0
AC010265.1	0	0	0	0	0	0
AC010285.1	0	0	0	0	0	0
AC010285.3	0	0	0	0	0	0
AC010287.1	0	0	0	0	0	0
AC010301.1	0	0	0	0	0	0
AC010306.1	0	0	0	0	0	0
AC010307.1	0	0	0	0	0	0
AC010319.1	0	0	0	0.200047	0	0.169857
AC010319.2	0	0	0	0	0	0
AC010320.5	0	0	0	0	0	0
AC010323.1	0	0	0	0	1.24422	0
AC010323.2	0	0	0	0	0	0
AC010325.1	0	0.51901	0.886701	0.513835	0	0.381512
AC010325.3	0	0	0	0	0	0
AC010326.1	0	0	0	0	0	0
AC010326.2	0	0	0	0	0	0
AC010326.4	0.377777	1.87341	1.15725	1.18808	0.329647	1.52964
AC010327.1	0	0	0	0	0	0
AC010327.2	0	0	0	0	0	0
AC010328.2	0	0	0	0	0	0
AC010329.2	0	0.054718	0.0551238	0	0	0
AC010329.3	0	0	0	0	0	0
AC010329.5	0	0	0	0	0	0
AC010332.1	0	0	0	0	0	0
AC010332.2	0	0	0	0	0	0
AC010338.1	0	0	0	0	0	0
AC010342.1	0	0	0	0	0	0
AC010343.1	0	0	0	0	0	0
AC010343.2	0	0	0	0	0	1.07044
AC010350.1	0	0	0	0	0	0
AC010368.1	0	0	0	0	0	0
AC010374.1	0	0	0	0	0	0
AC010374.2	0	0	0	0	0	0
AC010376.1	0	0	0	0	0	0
AC010378.1	0	0	0	0	0	0
AC010385.1	0	0	0	0	0	0
AC010385.2	0	0	0	0	0	0
AC010385.3	0	0	0	0	0	0
AC010395.2	0	0	0	0	0	0
AC010401.1	0	0	0	0	0	0
AC010409.1	0	0	0	0	0	0
AC010409.2	0	0	0	0	0	0
AC010422.3	0	0	0	0	0	0
AC010422.5	0	2.07114	0	3.03737	0	0
AC010422.6	0	0.301061	0	0.115763	0.0759408	0.0492087
AC010424.1	0	0	0	0.707272	0	1.40505
AC010442.1	0	0	0	0	0	0
AC010442.2	0	0	0	0	0	0
AC010460.1	0	0	0	0	0	0
AC010460.2	0	0	0	0	0	0
AC010460.3	0	0	0	0	0	0
AC010463.1	0	0	0	0	0	0
AC010468.1	0	0	0.212683	0	0	0.57775
AC010468.3	0	0	0	0	0	0
AC010469.1	0	0	0	0	0	0
AC010469.2	0	0	0	0	0	0
AC010476.1	0	0	0	0	0	0
AC010487.1	0	0	0	0	0	0
AC010487.3	0	0	0	0	0	0.142498
AC010487.4	0	0	0	0	0	0
AC010492.1	0	0	0	0	0	0
AC010492.2	0	0	0	0	0	0
AC010493.1	0	0	0	0	0	0
AC010503.3	0	0	0	0	0	0
AC010507.1	0	0.702275	1.11166	0.0777467	0.710471	0.502771
AC010507.2	0.466223	0.72139	0	0	0	0.570683
AC010518.1	0	0	0	0	0	0
AC010522.1	1.51429	1.35474	0	0.299915	0	0
AC010525.2	0	0	0	0	0	0
AC010531.1	0	0.51716	0.0929624	0	0	0.671589
AC010531.2	0	0	0	0	0	0
AC010542.3	0	0.888496	0.908384	0.531859	0	0
AC010546.1	0	0	0	0	0	0
AC010547.4	0	0	0	0	0	0
AC010547.5	0	0	0	0	0	0
AC010547.6	0	0	0	0	0	0
AC010547.7	0	0	0	0	0	0
AC010587.1	0	0	0	0	0	0
AC010587.2	0	0	0	0	0	0
AC010591.1	0	0	0	0	0	0
AC010598.1	0	0	0	0	0	0
AC010614.1	0	0	0.714297	0	0	0
AC010615.1	0	0.243196	0.37995	0.364862	0	0
AC010615.3	0	0	0	0	0	0
AC010615.4	0	0	0.637643	0	0	0
AC010616.1	0	0	0	0	0	0
AC010618.1	0	0	0	0	0	0
AC010619.1	0	0	0	0	0	0
AC010620.1	0	0	0	0	0	0
AC010620.2	0	0	0	0	0	0
AC010624.4	0	0	0	0	0	0
AC010625.1	0	0	0	0	0	0
AC010627.1	0	0	0	0	0	0
AC010631.1	0	0	0	0	0	0
AC010632.3	0	0	0	0	0	0
AC010642.1	0	0	0	0	0	0
AC010646.1	0	0	0	0	0	0
AC010650.1	0	0	0.387579	0	0	0
AC010653.1	0	0	0	0	0	0
AC010653.3	0	0	0	0	0	0
AC010655.1	0	0	0	0	0	0
AC010655.3	0.7862	0	0.436706	0	0.936787	0
AC010677.1	0	0	0	0	0	0
AC010678.1	0	0	0	0	0	0
AC010683.1	0	0	0	0	0	0
AC010724.1	1.80331	0	0	0	0	2.29855
AC010724.2	0	0	0	0	0	0
AC010731.1	0	0	0	0	0	0
AC010733.1	0.542563	1.55641	0	0	0	0.491986
AC010738.1	0	0	0	0	0	0
AC010740.1	0	0	0	0	0	0
AC010768.3	0	0	0	0	0	0
AC010867.1	0	0	0	0	0	0
AC010878.1	0	0	0	0	0	0
AC010881.1	0	0	0	0	0	0
AC010886.1	0	0	0	0	0	0
AC010894.1	0	0	0	0	0	0
AC010900.1	0	0	0	0	0	0
AC010900.2	0	0	0	0	0	0
AC010904.1	0	0	0	0	0	0
AC010928.1	0	0	0	0	0	0
AC010928.2	0	0	0	0	0	0
AC010928.3	0	0	0	0	0	0
AC010931.1	0	0	0	0	0	0
AC010967.3	0	0	0	0	0	0
AC010970.1	6.40294	6.31569	6.4317	6.49565	6.58959	6.62018
AC010975.2	0	0	0	0	0	0
AC010975.3	0	0	0	0	0	0
AC010980.1	0	0	0	0	0	0
AC010997.1	0	0	0	0	0	0
AC011005.1	0	0	0	0	0	0
AC011005.2	0	0	0	0	0	0
AC011005.3	0	0	0	0	0	0
AC011037.1	0	0	0	0	0	0
AC011043.1	4.32765	4.36603	4.31427	4.28136	4.26798	4.43585
AC011043.2	0.119372	0.157352	0.295868	0.102879	0.194858	0.302136
AC011092.1	0	0	0	0	0	0
AC011155.1	0	0	0	0	0	0
AC011193.2	0	0	0	0	0	0
AC011195.1	0	0	0	0	0	0
AC011195.2	0	0	0	0	0	0
AC011225.1	0	0	0	0	0	0
AC011233.1	0	0	0	0	0	0
AC011242.1	0	0	0	0	0	0
AC011247.3	0	0	0	0	0	0
AC011260.1	0	0	0	0	0	0
AC011270.1	0	0	0	0	0	0
AC011276.1	0	0	0	0	0	0
AC011290.2	0.925702	0	0	0.361378	0	0.214713
AC011295.1	0	0	0	0	0	0
AC011295.2	0	0.282554	0.0407347	0.228302	0	0
AC011298.2	0	0	0	0	0	0
AC011298.3	0	0	0	0	0	0
AC011330.1	0	0	0	0.160233	0	0
AC011346.1	0	0	0	0	0	0
AC011352.2	0	0	0	0	0	0
AC011406.1	0	0	0	0	0	0
AC011411.1	0	0	0	0.337891	0	0
AC011416.1	0	0	0	0	0	0
AC011416.2	0	0	0	0	0	0
AC011416.3	0	0	0	0	0	0
AC011431.1	0	0	0	0	0	0
AC011444.4	0	0	0	0	0	0
AC011447.1	0	0	0	0	0	0
AC011447.2	0	0	0	0	0	0
AC011447.4	0	0	0	0	0	0
AC011447.5	0	0	0	0	0	0
AC011448.1	0.533825	0.74355	1.42135	0.943108	0.188733	0.979645
AC011451.2	0	0	0	0	0	0
AC011452.1	0	0	0	0	0	0
AC011453.2	0	0	0	0	0	0
AC011455.3	0	0.329011	0.60872	0	0	0
AC011455.4	0	0.329011	0.60872	0	0	0
AC011458.1	0	0	0	0	0	0
AC011458.2	0	0	0	0	0	0
AC011460.1	0	0	0	0	0	0
AC011462.1	0	0.366277	0.475492	0	0.413949	0.18194
AC011467.2	0	0	0	0	0	0
AC011467.4	0	0	0	0	0	0
AC011467.5	0	0	0	0	0	0
AC011467.6	0	0	0	0	0	0
AC011468.4	0	0	0	0	0	0
AC011471.1	0	0	0	0	0	0
AC011471.4	0	0	0	0	0	0
AC011473.4	0	0	0	0	0	0
AC011475.1	0	0	0	0	0	0
AC011476.1	0	0	0	0	0	0
AC011476.5	0	0	0	0	0	0
AC011477.1	0.251323	0.542814	0.676646	0.115052	0.573437	0
AC011477.5	0	0	0	0	0	0
AC011477.6	0	0	0	0	0	0
AC011477.7	0	0	0	0	0	0
AC011479.1	2.71058	0	1.02932	2.08594	0	2.14078
AC011483.1	0	0	0	0	0	0
AC011487.1	0	0	0	0	0	0
AC011487.2	0	0.00274914	0	0	0	0
AC011487.3	0	0	0	0	0	0
AC011487.4	0	0	0	0	0	0
AC011491.1	0	0	0	0	0	0
AC011492.1	0	0	0	0	0	0
AC011493.1	0	0	0	0	0	0
AC011494.1	0	0	0	0	0	0
AC011495.1	0	0.310483	0	0.297476	0.299802	0
AC011497.2	0.542487	0.282819	0	1.14621	0.487655	2.3931
AC011498.4	0	0	0.263961	0	0	0
AC011498.5	0	0	0	0	0	0
AC011499.1	0	0	0	0	0	3.44e-07
AC011500.1	0	0	0	0	0	0
AC011500.2	0	0	0	0	0	0
AC011506.1	0	0	0	0	0	0.3024
AC011511.1	0.252359	0.284303	0	0.0971494	0.125004	0.119837
AC011511.4	1.18008	1.13522	0.536333	1.29186	0.808839	1.55179
AC011515.1	0	0	0	0	0	0
AC011530.1	0	0.889963	1.42506	1.97252	1.24481	0
AC011551.1	0	0	0	0	0	0
AC011591.2	0	0	0	0	0	0
AC011595.2	0	0	0	0	0	0
AC011602.1	0	0	0	0	0	0
AC011603.4	0	0	0	0	0	0
AC011604.1	0	0	0	0	0	0
AC011604.2	0	0	0	0	0	0
AC011611.1	0	0	0	0	0	0
AC011611.5	0	0	0	0	0	0
AC011611.6	0	0	0	0	0	0
AC011626.1	0	0	0	0	0	0
AC011712.1	0	0	0	0	0	0
AC011716.1	0	0	0	0	0	0
AC011726.1	0	0	0	0	0	0
AC011742.1	0	0	0	0	0	0
AC011742.2	0	0	0	0	0	0
AC011742.3	0	0	0	0	0	0
AC011753.1	0	0	0	0	0	0
AC011753.3	0	0	0	0	0	0
AC011753.4	0	0	0	0	0	1.06101
AC011767.1	0	0	0	0.436186	0.438908	0
AC011816.1	0	0	0	0	0	0
AC011825.1	0	0.505184	0	0	0	0
AC011840.4	0	0	0	0	0	0
AC011841.1	0.119372	0.157352	0.295868	0.102879	0.194858	0.302136
AC011853.1	0	0	0	0	0	0
AC011890.1	0.774266	0	0	0	0	0
AC011890.2	0	0	0	0	0	0
AC011891.2	0	0	0	0	0	0
AC011894.1	0	0	0	0	0	0
AC011904.1	0	0	0	0	0	0
AC011921.2	0	0	0	0	0	0
AC011921.3	0	0	0	0	0	0
AC011933.1	0.726176	0	0	0	0	0
AC011939.1	0	0	0	0	0	0
AC011978.1	0	0	0	0	0	0
AC011979.1	0	0	0	0	0	0
AC011979.2	0	0	0	0	0	0
AC011998.1	0	0	0	0	0	0
AC011998.2	0	0	0	0	0	0
AC011999.1	0	0	0	0	0	0
AC012005.1	0	0	0	0	0	0
AC012005.2	0	0	0	0	0	0
AC012044.1	0	0	0	0	0	0
AC012065.2	0	0	0	0	0	0
AC012065.5	0	0	0	0	0	0
AC012066.1	0	0	0	0	0	0
AC012075.1	0	0	0	0	0	0
AC012078.1	0	0	0	0	0	0
AC012085.1	0	0	0	0	1.3385	0
AC012100.1	0	0	0	0	0	0
AC012119.1	0	0	0	0	0	0
AC012123.2	0	0	0	0	0	0
AC012146.2	0	0	0	0	0	0
AC012146.4	0	0	0	0	0	0
AC012158.1	0	0	0	0.111277	0	0
AC012158.2	0	0	0	0	0	0
AC012170.1	0	0	0	0	0	0.560715
AC012175.1	0	0	0	0	0	0
AC012181.1	0	0.45458	0	0	0	0
AC012182.1	0	0	0	0	0	0
AC012184.2	0.66701	0	0	0.207479	0	0
AC012186.1	0	0	0	0	0	0
AC012254.2	1.8967	3.17847	4.07677	0	3.86315	3.41456
AC012254.4	1.35048	0	0	0	0	0
AC012306.1	0	0	0	0	0	0
AC012308.1	0	0	0	0	0	0
AC012309.1	0.50254	0	0.0142138	0.273471	0	0
AC012314.1	1.03775	0.785895	1.07482	0.551925	1.40506	0.53629
AC012314.10	1.03775	0.785895	1.07482	0.551925	1.40506	0.53629
AC012314.11	1.03775	0.785895	1.07482	0.551925	1.40506	0.53629
AC012314.12	1.03775	0.785895	1.07482	0.551925	1.40506	0.53629
AC012314.2	0	0	0	0	0	0
AC012314.4	1.03775	0.785895	1.07482	0.551925	1.40506	0.53629
AC012314.5	1.03775	0.785895	1.07482	0.551925	1.40506	0.53629
AC012314.6	1.03775	0.785895	1.07482	0.551925	1.40506	0.53629
AC012314.7	0	0	0	0	0	0
AC012314.8	1.03775	0.785895	1.07482	0.551925	1.40506	0.53629
AC012339.2	0	0	0	0	0	0
AC012354.2	0	0	0	0	0	0
AC012358.2	0	0.300395	0.111203	0.225214	0	0.472147
AC012362.1	0	0	0	0	0	0
AC012368.3	0	0	0	0	0	0
AC012400.1	0	0	0	0	0	0
AC012414.1	0	0	0	0	0	0
AC012414.2	0	0	0	0	0	0
AC012414.6	0	0	0	0	0	0
AC012414.7	0	0	0	0	0	0
AC012433.1	0	0	0	0	0	0
AC012435.1	0.458861	0.655744	0.503908	0.383	0.340863	0.120691
AC012441.1	0.967098	0.809534	1.41855	0.252871	0.690699	1.17354
AC012441.2	0	0	0.633626	0	0.349151	0.594334
AC012442.3	0	0.333784	0	0.168889	0.169205	0
AC012443.1	0	0	0	0	0	0
AC012454.1	0	0	0	0	0	0
AC012468.1	0	0	0	0	0	0
AC012488.1	0	0	0	0	0	0
AC012491.1	0	0	0	0	0	0
AC012493.1	0	0	0	0	0	0
AC012493.2	0	0	0	0	0	0
AC012493.3	0	0	0	0	0	0
AC012497.1	0	0	0	0	0	0
AC012498.1	0	0	0	0	0	0
AC012498.2	0	0	0	0	0	0
AC012501.2	0	0	0	0	0.118862	0
AC012507.3	0	0	0	0	0	0
AC012512.1	0.264753	0	0	0	0	0
AC012513.2	0	0	0	0	0	0
AC012519.1	0	0	0	0	0	0
AC012531.3	0	0	0	0	0.211713	0
AC012569.1	0	0	0	0	0.0980446	0
AC012616.1	0	0	0	0	0	0
AC012618.1	0	0	0	0	0	0
AC012618.2	0	0	0	0	0	0
AC012618.3	0	0.244474	0	0	0	0
AC012651.1	0	0	0	0	0	0
AC012653.1	0	0	0	0	0	0
AC012669.1	0	0	0	0	0	0
AC012671.1	0	0	0	0	0	0
AC012676.2	0	0	0	0	0	0
AC012676.6	0	0	0	0	0	0
AC013244.1	0	0	0	0	0	0
AC013244.2	0	0	0	0	0	0
AC013244.3	0	0	0	0	0	0
AC013248.2	0	0	0	0	0	0
AC013262.1	0	0	0	0	0	0
AC013267.1	0	0	0	0	0	0
AC013268.1	0	0.057861	0	0.154488	0.0858725	1.01536
AC013268.2	0	0	0	0	0	0
AC013268.3	0	0	0	0	0	0
AC013268.4	0	0	0	0	0	0
AC013269.1	0	0	0	0	0	0
AC013271.1	0.402031	0.494259	0.309222	0.182888	0.267422	0.421069
AC013283.1	0	0	0	0	0	0
AC013290.1	0	0	0	0	0.332787	0
AC013355.1	0	0	0	0	0	0
AC013356.1	0	0	0	0	0	0
AC013394.1	1.40347	2.75587	0.75507	3.2551	3.11155	0.27612
AC013399.1	0	0	0	0	0	0
AC013403.1	0	0	0	0	0	0
AC013404.1	0	0	0	0	0	0
AC013410.1	0	0	0	0	0	0
AC013410.2	0	0	0	0	0	0
AC013412.1	0	0	0	0	0	0
AC013429.1	0	0	0	0	0	0
AC013429.2	0	0	0	0	0	0
AC013437.2	0	0	0	0	0	0
AC013439.1	0	0	0	0	0	0
AC013442.1	0	0	0	0	0	0
AC013444.1	0	0	0	0	0	0
AC013444.2	0	0	0	0	0	0
AC013452.1	0	0	0	0	0	0
AC013467.1	0	0	0	0	0	0
AC013467.2	0	0	0	0	0	0
AC013469.1	0	0	0	0	0	0
AC013470.1	0	0	0	0	0	0
AC013470.2	0	0	0	0	0.0691851	0
AC013470.3	0	0	0	0	0	0.139941
AC013470.4	0	0	0	0	0	0
AC013474.1	0	0.216647	0	0	0	0
AC013476.2	0	0	0	0	0	0
AC013488.1	0	0	0.162473	0	0	0
AC013489.2	0	0	0	0	0	0
AC013553.1	0	0.821219	0	0	0	0.820546
AC013553.2	0	0	0	0	0	0
AC013562.2	0	0	0	0	0	0
AC013565.2	0	0	0	0	0	0
AC013643.1	0	0	0	0	0	0
AC013701.1	0	0	0	0	0	0
AC013734.1	0	0	0	0	0	0
AC013759.1	0	0	0	0	0	0
AC013787.1	0	0	0	0	0	0
AC013828.1	0	0	0	0	0	0
AC013828.2	0	0	0	0	0	0
AC015524.1	0	0	0	0	0	0
AC015688.1	0	0	0	0	0	0
AC015688.2	0	0	0	0	0	0
AC015688.3	0	0	0	0	0	0
AC015688.4	0	0	0	0	0.0689398	0
AC015688.5	0	0	0	0	0	0
AC015688.6	0	0	0	0	0	0
AC015688.7	0	0	0	0	0	0
AC015689.2	0	0	0	0	0	0
AC015712.3	0	0	0	0	0	0
AC015720.1	0	0	0	0	0	0
AC015720.2	0	0	0	0	0	0
AC015724.1	0	0	0	0	0	0
AC015743.1	0	0	0	0	0	0
AC015795.1	0	0	0	0	0	0
AC015801.1	0	0	0	0	0	0
AC015802.2	0	0	0	0	0	0
AC015802.6	0.187897	0.71296	2.05694	0.341533	0.530238	2.12553
AC015813.2	0	0	1.22843	0	3.25702	1.19834
AC015818.1	0	0	0	0	0	0
AC015818.3	0	0	0	0	0	0
AC015818.5	0	0	0	0	0	0
AC015818.6	0	0	0	0	0	0
AC015818.7	0	0	0	0	0	0
AC015820.1	0	0	0	0	0	0
AC015849.6	0	0	0	0	0	0
AC015849.8	0	0	0	0	0	0
AC015864.1	0	0	0	0	0	0
AC015871.1	0	0	0	0	0	0
AC015871.2	0	0	0	0	0	0
AC015908.1	0	0	0	0	0	0
AC015910.1	0	0	0	0	0.270878	0
AC015911.1	0	0	0	0	0	0
AC015911.4	0	0	0	0	0	0
AC015911.7	0	0	0	0	0	0
AC015911.8	0	0	0	0	0	0
AC015912.2	0	0	0	0	0	0
AC015914.2	0	0	0	0	0	0
AC015917.1	0	0	0	0	0	0
AC015922.1	0	0	0	0	0	0
AC015922.2	0	0	0	0	0	0
AC015977.1	0	0	0	0	0	0
AC015978.1	0	0	0	0	0	0
AC015983.1	0	0	0	0	0	0
AC016027.4	0	0	0	0	1.0643	0
AC016027.5	0	0	0	0	0	0
AC016065.2	0	0	0	0	0	0
AC016144.1	0	0	0	0	0	0
AC016180.1	0	0	0	0	0	0
AC016182.1	0	0	0	0	0	0
AC016256.1	0	0	0	0	0	0
AC016292.2	0	0	0	0	0	0
AC016304.1	0	0	0	0	0	0
AC016397.1	0	0	0	0	0	0
AC016482.1	0	0	0	0	0	0
AC016482.2	0	0	0	0.104715	0	0
AC016489.1	0	0	0	0	0	0
AC016546.1	0	0	0	0	0	0
AC016559.1	0	0	0	0	0	0
AC016559.2	0	0	0	0	0	0
AC016582.1	0	0	0	0	0	0.375831
AC016582.2	0	0	0	0	0	0
AC016582.3	0.891863	1.44794	1.27327	1.2143	1.07457	1.53593
AC016596.1	0	0	0	0	0	0
AC016612.1	0	0	0	0	0	0
AC016629.1	0	0	0	0	0	0
AC016629.2	0	0	0	0	0	2.02559
AC016632.1	0	0	0	0	0	0
AC016638.1	0	0	0	0	0	0
AC016687.1	0	0	0	0	0	0
AC016691.1	0	0	0	0	0	0
AC016694.1	0	0	0	0	0	0
AC016696.1	0	0	0	0	0	0
AC016700.1	0	0.673212	0	0	0	0
AC016700.2	0	0	0	0	0	0
AC016712.1	0	0	0	0.518959	0	0
AC016716.1	0	0	0	0	0	0
AC016717.1	0	0	0	0	0	0
AC016724.1	0	0	0	0	0	0
AC016727.2	0	0	0	0	0	0
AC016734.1	0	0	0	0	0	0
AC016739.1	0.686284	0.963907	0	0.588089	0.945904	0.592416
AC016769.1	0	0	0	0	0	0
AC016769.2	0	0	0	0	0	0
AC016769.3	0	0	0	0	0	0
AC016769.4	0	0	0	0	0	0
AC016772.1	0	0	0	0	0	0
AC016831.2	0	0	0	0	0	0
AC016831.3	0	0	0	0	0.0857493	0
AC016831.4	0	0	0	0	0	0
AC016839.1	0	0	0	0	0	0
AC016877.2	0	0	0	0	0	0
AC016885.3	0	0	0	0	0	0
AC016894.1	0	0	0	0	0	0
AC016907.1	0	0	0	0	0	0
AC016908.1	0	0	0	0	0	0
AC016909.1	0	0	0	0	0	0
AC016911.1	0	0	0	0	0	0
AC016925.1	0	0	0	0	0	0
AC016925.2	0	0	0	0	0	0
AC016930.1	0	0	0	0	0	0
AC016954.1	0	0	0	0	0	0
AC016956.1	0	0	0	0	0	0
AC016957.1	0	0	0	0	0	0
AC016991.1	0	0	0	0	0	0
AC016999.2	0	0	0	0	0	0
AC017002.4	0	0	0	0	0	0
AC017007.1	0	0	0	0	0	0
AC017007.2	0.13625	0	0	0	0	0
AC017007.3	0	0	0	0	0	0
AC017007.4	0	0	0	0	0	0
AC017013.1	0	0	0	0	0	0
AC017015.1	0	0	0	0	0	0
AC017019.1	0	0	0	0	0	0
AC017035.1	0	0	0	0	0	0
AC017037.1	0	0	0	0	0	0
AC017037.2	0	0	0	0	0	0
AC017078.1	0	0	0	0	0	0
AC017079.1	0	0	0	0	0	0
AC017079.2	0	0	0	0	0	0
AC017081.1	0	0	0	0	0	0
AC017081.2	0	0	0	0	0	0
AC017081.3	0.515606	0.91307	0.766974	0.960595	0	0
AC017081.4	2.78417	2.16746	1.70307	1.72118	1.96225	2.3604
AC017081.5	1.86304	0.915082	2.08106	1.60907	1.02511	1.50849
AC017083.1	0	0	0	0.377793	0	0
AC017083.4	1.51973	1.85402	1.17781	1.8889	1.41887	1.7983
AC017099.1	0	0	0	0	0	0
AC017100.2	0	0	0	0	0	0
AC017104.2	0	0	0	0	0	0
AC017104.4	0	0	0	0	0.0934648	0
AC017104.5	0	0	0	0	0	0
AC018371.2	0	0	0	0	0	0
AC018437.1	0	0	0	0	0	0
AC018442.1	0	0	0	0	0	0
AC018442.3	0	0	0	0	0	0
AC018448.1	0	0	0	0	0	0
AC018448.2	0	0	0	0	0	0
AC018462.2	0	0	0	0	0	0
AC018463.1	0	0	0	0	0	0
AC018475.1	0.760708	0	0	0	0	0
AC018512.1	0	0	0	0	0	0
AC018523.1	0	0	0	0	0	0.635551
AC018523.2	1.95121	2.31217	3.92847	0.219442	4.26098	3.51768
AC018552.1	0	0	0	0	0	0
AC018552.3	0	0	0	0	0	0
AC018554.2	0	0	0	0	0	0
AC018554.3	0	0	0	0	0	0
AC018555.1	0	0	0	0	0	0
AC018558.4	0	0	0	0	0	0
AC018558.5	0	0	0	0	0	0
AC018618.2	0	0	0	0	0	0
AC018620.1	0	0	0	0	0	0
AC018630.1	0	0	0	0	0	0
AC018630.2	0	0	0	0	0	0
AC018630.3	0	0	0	0	0	0
AC018630.4	0	0	0	0	0	0
AC018630.5	0	0	0	0	0	0
AC018630.6	0	0	0	0	0	0
AC018634.1	0	0	0	0	0	0
AC018635.1	0	0	0	1.22182	0.0961226	0
AC018638.1	0.694461	0.624041	0	1.66074	0	1.48748
AC018638.2	0	0	0	0.796173	0.479176	0
AC018638.3	0	0	0	0	0	0
AC018638.4	0.896578	1.1502	1.62066	0.71554	0.778793	1.05481
AC018638.5	0.49256	0.735244	0.420498	0.366518	0.385917	0.889257
AC018638.8	0	0	0	0	0	0.762239
AC018639.1	0	0	0	0	0	0
AC018641.1	0	0	0	0	0	0
AC018644.1	0	0.33341	0	0	0	0
AC018645.1	0	0	0	0	0	0
AC018653.2	0	0	0	0	0	0
AC018659.1	0	0	0	0	0	0
AC018688.1	0	0	0	0	0	0
AC018692.2	0	0	0	0	0	0
AC018692.3	0	0	0	0	0	0
AC018693.2	0	0	0	0	0	0
AC018695.1	0	0	0	0	0	0
AC018695.5	0	0	0	0	0	0
AC018709.1	0	0	0	0	0	0
AC018710.1	0	0	0	0	0	0
AC018712.1	0	0	0	0	0	0
AC018714.1	0	0	0	0	0	0
AC018717.1	0	0	0	0	0	0
AC018735.1	0	0	0	0	0	0
AC018737.1	0	1.0359	0	0	0	0
AC018738.1	0	0	0	0	0	0
AC018755.2	0	0	0	0	0	0
AC018755.3	0	0	0	0.624737	0	0.49098
AC018793.1	0	0	0	0	0	0
AC018793.2	0	0	0	0	0	0
AC018793.3	0	0	0	0	0	0
AC018793.4	0	0	0	0	0	0
AC018793.5	0	0	0	0	0	0
AC018797.1	0	0	0	0	0	0
AC018797.3	0	0	0	0	0	0
AC018804.1	0	0	0	0	0.966375	0
AC018845.2	0	0	0	0	0	0
AC018846.1	0	0	0	0	0	0
AC018861.1	0	0	0	0	0	0
AC018865.2	0	0	0	0	0	0
AC018868.1	0	0	0	0	1.03583	0
AC018868.2	0	0	0	0	0.121199	0.131795
AC018880.1	0	0	0	0	0	0
AC018880.2	0	0	0	0	0	0
AC018889.1	0	0	0	0	0	0
AC018892.1	0	0	0	0	0	0
AC018892.2	0	0	0	0	0	0
AC018992.1	0	0	0	0	0	0
AC019050.1	0	0	0	0	0	0
AC019070.1	0	0	0	0	0	0
AC019072.1	0	0	0	0	0	0
AC019080.2	0	0	0	0	0	0
AC019084.1	0	0	0	0	0	0
AC019097.1	0.296242	0	0	0.601	0.642225	0.321243
AC019109.1	0	0	0	0.0791185	0	0
AC019117.3	0	1.76211	1.1227	0	0	0.720986
AC019129.1	0	0	0	0	0	0
AC019155.1	0	0	0.320423	0	0	0
AC019159.1	0	0	0	0	0	0
AC019173.1	0	0	0	0	0	0
AC019176.1	0	0	0	0	0	0
AC019176.2	0	0	0	0	0	0
AC019178.1	0	0	0	0	0	0
AC019178.2	0	0	0	0	0	0
AC019181.1	0	1.36455	0	0	0	0
AC019185.1	0	0	0	0	0	0
AC019185.3	0	0	0	0	0	0
AC019193.1	0	0	0	0	0	0
AC019205.1	0	0	0	0	0	0
AC019205.3	0	0	0	0	0	0
AC019206.1	0	0.452001	0	0	0	0
AC019227.1	0	0	0	0	0	0
AC019235.1	0	0	0	0	0	0
AC019288.1	0	0	0	0	0	0
AC019294.1	0	0	0	0	0	0
AC019294.3	0	0	0	0	0	0
AC019322.1	0	0	0	0	0	0
AC019322.2	0	0	0	0	0	0
AC019322.3	0	0	0	4.4e-08	0	0
AC020549.1	0	0	0	0	0	0
AC020549.2	0	0	0	0	0	0
AC020550.1	0	0	0	0	0	0
AC020593.1	0	0	0	0	0	0
AC020611.1	0	0	0	0	0	0
AC020612.1	0	0	0	0	0	0
AC020612.2	0	0	0	0	0	0
AC020629.1	0	0	0	0	0	0
AC020633.1	0	0	0	0	0	0
AC020636.2	0	0	0	0	0	0
AC020658.1	0	0	0	0	0	0
AC020661.2	0	0	0	0	1.08755	1.53995
AC020679.2	0	0	0	0	0	0
AC020688.1	0	0	0	0	0	0
AC020699.1	0	0	0	0	0	0
AC020728.1	0	0	0	0	0	0
AC020765.1	0	0	0	0	0	0
AC020765.3	0	0	0	0	0	0
AC020765.4	0	0	0	0	0	0
AC020779.1	0.237972	0.176472	0.224285	0	0.376584	0.363533
AC020890.1	0	0	0	0	0	0
AC020891.4	0	0	0	0	0	0
AC020893.1	0	0	0	0	0	0
AC020893.2	0	0	0	0	0	0
AC020895.1	0	0	0	0	0	0
AC020898.1	0	0	0	0.38077	0.209008	0
AC020899.1	0.326156	0	0	0.286604	0.288526	0
AC020904.1	0	0	0	0	0	0
AC020904.2	0	0	0	0.0932431	0	0
AC020909.1	0	0	0	0	0	0
AC020910.2	0	0	0	0	0	0
AC020910.3	0	0	0	0	0	0
AC020914.1	0	0	0	0	0	0
AC020914.3	0	0	0	0	0	0
AC020914.4	0	0	0	0	0	0
AC020914.5	0	0	0	0	0	0
AC020914.6	0	0	0	0	0	0
AC020914.7	0	0	0	0	0	0
AC020915.1	3.32139	2.61955	2.67498	1.97618	2.60937	1.50326
AC020915.2	0	0	0	0	0.297958	0.0599208
AC020915.5	0	0	0	0	0	0
AC020915.6	0.532372	0	0	0.484635	0.351415	0
AC020917.1	0	0	0	0	0	0
AC020922.1	0	0	0	0	0	0
AC020934.3	0	0	0	0	0	0
AC020937.1	0	0	0	0	0	0
AC020978.1	0	0	0	0	0	0
AC020983.1	0	0.339806	0.344027	0	0	0
AC021001.1	0	0	0	0	0	0
AC021006.1	0	0	0	0	0	0
AC021006.3	0	0	0	0	0	0
AC021016.1	0	0	0	0	0	0
AC021072.1	0	0	0	0	0	0
AC021074.1	0	0	0	0	0	0
AC021074.2	0	0	0	0	0	0
AC021087.2	0	0	0	0	0	0
AC021106.1	0.17157	0.51746	0	0.147696	0.147644	0
AC021106.2	0	0	0	0	0	0
AC021146.1	0	0	0	0	0	0
AC021146.10	0	0	0	0	0	0
AC021146.11	0	0	0	0	0	0
AC021146.13	0	0	0	0	0	0
AC021146.14	0	0	0	0	0	0
AC021146.15	0	0	0	0	0	0
AC021146.2	0	0	0	0	0	0
AC021146.3	0	0	0	0	0	0
AC021146.4	0	0	0	0	0	0
AC021146.5	0	0	0	0	0	0
AC021146.6	0	0	0	0	0	0
AC021146.7	0	0	0	0	0	0
AC021146.8	0	0	0	0	0	0
AC021146.9	0	0	0	0	0	0
AC021148.1	0	0	0	0	0	0
AC021171.1	0	0	0.249899	0	0	0
AC021171.2	0	0	0	0	0	0
AC021193.1	0	0	0	0	0	0
AC021205.1	0	0	0	0	0	0
AC021205.2	0	0	0	0	0	0
AC021220.1	0	0	0	0	0	0
AC021231.2	0	0.433961	0.240699	0.226645	0	0
AC021231.3	0	0	0	0	0	0
AC021242.1	0	0	0	0	0	0
AC021269.1	0	0	0	0	0	0
AC021269.2	0	0	0	0	0	0
AC021305.1	0	0	0	0	0.0993303	0
AC021382.1	0	0	0	0	0	0
AC021443.1	0	0	0	0	0	0
AC021451.1	0	0	0	0	0	0
AC021506.2	0	0	0	0	0	0
AC021646.1	0	0	0	0	0	0
AC021660.1	0	0	0	0	0	0
AC021678.1	0	0	0	0	0	0
AC021678.3	0	0	0	0	0	0
AC021723.1	0	0	0	0	0	0
AC021733.2	0	0	0	0	0	0
AC021739.1	0	0	0	0	0	0
AC021749.1	0	0	0	0	0	0
AC021753.1	0	0	0	0	0	0
AC021755.1	0	0	0	0	0	0
AC021818.2	0	0	0	0	0	0
AC021820.1	0	0	0	0	0	0
AC021876.1	0	0	0	0	0	0
AC022001.1	0	0	0	0	0	0
AC022016.2	0.962659	0.430627	0.103404	3.00956	1.64211	1.11847
AC022018.1	0	0	0	0	0	0
AC022022.1	0	0	0	0	0	0
AC022022.2	0	0	0	0	0	0
AC022028.1	0	0	0	0	0	0
AC022034.1	0	0	0	0.0681834	0	0
AC022034.3	0	0	0	0	0	0.397292
AC022069.1	0	0	0	0	0	0
AC022080.1	0.240439	0	0	0	0.375056	0
AC022080.2	0	0	0	0	0	0
AC022080.3	0	0	0	0	0	0
AC022106.1	0	0	0	0	0	0
AC022106.2	0	0	0	0	0	0
AC022121.1	0	0	0	0	0	0
AC022133.1	0	0	0	0	0	0.367125
AC022137.1	1.27738	0	0.817778	0	0	0
AC022137.2	0	0	0.29612	0	0	0
AC022145.2	0	0	0	0	0	0
AC022146.1	0	0	0	0	0	0
AC022149.1	0	0	0	0	0	0
AC022149.2	0	0	0	0	0	0
AC022167.5	0	0.190186	0.0217042	0	0.0916082	0
AC022182.3	0.409472	0.666459	0	0.250064	0.188887	0.0727697
AC022202.1	0	0	0	0	0	0
AC022206.1	0	0	0	0	0	0
AC022210.1	0	0.218951	0	0	0	0
AC022215.1	0	0	0	0	0	0
AC022217.1	0	0	0.237856	0	0	0
AC022217.4	0	0	0	0	0	0
AC022254.1	0	0	0	0	0	0
AC022296.1	0	0	0	0	0	0
AC022296.2	0	1.30297	0	0	1.10964	0
AC022306.1	0	0	0	0	0	0
AC022325.1	0	0	0	0	0	0
AC022335.1	0	0	0	0	0	0
AC022336.1	0	0	0	0	0	0
AC022360.1	0	0	0	0	0	0
AC022364.2	0	0	0	0	0	0
AC022384.1	1.12451	0.453993	1.67631	1.05862	1.37757	0.671135
AC022387.2	0	0	0	0	0	0
AC022400.4	0	0	0	0	0	0
AC022400.6	1.42263	0.0438314	0.71167	0.0773089	0.378593	0
AC022404.1	0	0	0	0	0	0
AC022415.1	0	0	1.28186	0	0	0
AC022431.1	0	0.463304	0	0	0	0
AC022432.1	0	0.678704	0	0	0	0
AC022441.3	0	0	0	0	0	0
AC022447.4	0	0	0	0	0	0
AC022483.1	0	0	0	0	0	0
AC022483.2	0	0	0	0	0	0
AC022493.1	0	0	0	0	0	0
AC022493.2	0	0	0	0	0	0
AC022494.1	0	0	0	0	0	0
AC022507.1	0	0	0	0	0	0
AC022523.2	0	0	0	0	0	0
AC022559.1	0	0	0	0	0	0
AC022616.1	0	0	0	0	0	0
AC022616.2	0	0	0	0	0	0
AC022616.3	0	0	0	0	0	0
AC022616.4	0	0	0	0	0	0
AC022616.5	0	0	0	0	0	0
AC022616.6	0	0	0	0	0	0
AC022616.7	0	0	0	0	0	0
AC022616.8	0	0	0	0	0	0
AC022634.1	0	0	0	0	0	0
AC022655.2	0	0	0	0	0	0
AC022662.1	0	0	0	0	0	0
AC022690.1	0	0	0	0	0	0
AC022695.1	0	0	0	0	0	0
AC022701.1	0	0	0	0	0	0
AC022709.1	0	0	0	0	0	0
AC022730.1	0	0	0	0	0	0
AC022730.2	0	0	0	0	0	0
AC022748.1	0	0	0	0	0	0
AC022748.2	0	0	0	0	0	0
AC022748.3	0	0	0	0	0	0
AC022784.5	0	0	0	0	0	0
AC022790.1	0	0	0	0	0	0
AC022795.1	0	0	0	0	0	0
AC022826.1	0	0	0	0	0	0
AC022826.2	1.93101	1.58798	0	0.965926	1.69414	2.33323
[truncated: 33,832 more rows]
