# Supplementary material for: STRIPAK directs PP2A activity toward MAP4K4 to promote oncogenic transformation of human cells
Source: eLife. 2020 Jan 8;9:e53003. doi: 10.7554/eLife.53003 (PMC6984821; doi:10.7554/eLife.53003)
Supplement: Supplementary file 7. [file elife-53003-supp7.xlsx]

## Sheet: S7
Supplementary file 7. Genesets used in the study.
MAP4K4_KD_Signature	MAP4K4_Signature	RPS3AP37	STARD7	SGCA	AC093826.1	SLC5A3	G6PD	FBXO44	AC008620.1	AC009237.3	MMP14	AL355877.3	AL358232.1	ARPC5	EIF2AK1	DUX4L22	CHKB-CPT1B	RFLNB	SLC20A1	TXNDC5	MAP4K4	MSRB1	AC009169.1	FMNL2	SBF1	GNG12	BCAN	WWTR1	APCDD1L	TMEM253	MTND4P31	RPL37A	HDAC1	CELSR1	CD24	AF252830.1	LTBP3	ITIH2	SCEL	ZNF969P	AL157713.1	TOB2	PGM5P2	FTL	RPL12	SLC35B2	APOBEC3AP1	AC120057.1	ZMYM4
Feng_et_al_YAP1_Geneset	Feng_et_al_YAP1_Geneset	AMOTL2	CCND1	CTGF	CYR61	DUSP6	TEAD4	TRIB3
CORDENONSI_YAP_CONSERVED_SIGNATURE	http://www.broadinstitute.org/gsea/msigdb/cards/CORDENONSI_YAP_CONSERVED_SIGNATURE	AMOTL2	ANKRD1	AXL	BICC1	BIRC5	CDC20	CDKN2C	CENPF	COL4A3	CRIM1	CTGF	CYR61	DAB2	DDAH1	ASAP1	DLC1	DUSP1	DUT	ECT2	EMP2	ETV5	FGF2	FLNA	FSCN1	FSTL1	GADD45B	GAS6	GGH	GLS	HEXB	HMMR	AGFG2	ITGB2	ITGB5	LHFP	MARCKS	MDFIC	NDRG1	PDLIM2	PHGDH	PMP22	SCHIP1	SERPINE1	SGK1	SH2D4A	SHCBP1	SLIT2	STMN1
HippoPathwayGenes	Hippo Pathway Genes	AMOT	AMOTL1	AMOTL2	CDKN2A	DCHS1	DCHS2	FAT1	FAT2	FAT3	FAT4	FRMD6	LATS1	LATS2	NF2	PIK3CA	SAV1	STK3	STK4	TEAD1	TEAD2	TEAD3	TEAD4	TP53	WWC1	WWTR1	YAP1
YAP1_UP	YAP1_UP	SPP1	GATA3	GNB5	PRKCQ	TESK1	C21ORF25	PIK3C3	PRKX	FLJ21127	ZNF318	CDK6	HIST2H2BE	SIAHBP1	MALT1	FAT	PTK2B	PRKAG2	APP	S100A4	RALGDS	YKT6	DUSP14	MICAL-L1	NFATC3	PPP1R13B	HIST1H2BK	RALA	UFM1	CANT1	IKBKB	SH3BP5	ASCC3	IFNAR1	RRAGA	PTPN1	CNOT4	TMEM2	ARL4C	SRC	FYN	VAT1	TCEAL4	PSCD1	PYGL	MAPKAPK3	CHIC2	HOXA5	CD44
IPA_TAZ_UP	TAZ_UP	CYR61	DAND5	SFTPC	ANKRD1	PPP1R3B	EDN1	TAGLN
IPA_YAP1_UP	YAP1_UP	PPP1R3B	ANKRD1	EDN1	NLRC4	MYH7	TAGLN	CYR61
YAP1.mtUP	YAP1.mt_UP	IGFBP3	DUSP14	WRB	PTPN6	KDELR2	LIPA	GPR30	CASP3	SPP1	S100A4	ITGB1BP1	FHL2	IKBKB	GATA3	APBB2	ARID5B	PRKCQ	ATP11B	TCEAL4	GFOD1	EPHA3	FAS	PRSS23	GDPD5	SOX2	TIMELESS	PROS1	C21ORF25	USP6NL	TES	PIK3C3	H2AFV	CALU	BMP4	MYLK	KLHL9	TPM1	GPC1	TMEM2	PDIA5	MNAT1	PWP1	PYGL	MALT1	PECR	PSIP1	SRC	GADD45B
Zhao_et_al_YAP1_Geneset	Zhao_et_al_YAP1_Geneset	ANKRD1	AOMTL2	CTGF	CTGF	CYR61	CYR61	EDN1	EGR3	EGR4	PPP1R3B	TAGLN
Yu_et_al_YAP1_Geneset	Yu_et_al_YAP1_Geneset	ALCAM	AXL	C6orf173	CCND1	CENPA	CTGF	CYR61	DTL	DUSP6	EGR1	ETV5
Hiemer_et_al_YAP1_Geneset	Hiemer_et_al_YAP1_Geneset	AURKA	BIRC5	CCNE2	CDC6	CDK2	PCNA	PLK4
[truncated: 452 more columns]
